# Supplementary material for: Growth inhibition at the ice prismatic plane induced by a spruce budworm antifreeze protein: a molecular dynamics simulation study
Source: Royal Society of Chemistry journal article supplement (doi:10.1039/c1cp21929d), 2011-01-01
Supplement: c1cp21929d.pdf [file c1cp21929d.pdf]

Electronic Supplementary Information (ESI)

Initial coordinates (Å) of sbwAFP's atomic types and H<sub>2</sub>O's of ice in the simulation system (in Protein Data Bank format).

sbwAFP with binding conformation A

|      |    |     |       |   |        |        |        |   |
|------|----|-----|-------|---|--------|--------|--------|---|
| ATOM | 1  | N   | ASP A | 1 | 48.542 | 11.384 | 43.963 | N |
| ATOM | 2  | CA  | ASP A | 1 | 48.314 | 12.847 | 44.145 | C |
| ATOM | 3  | C   | ASP A | 1 | 49.275 | 13.645 | 43.259 | C |
| ATOM | 4  | O   | ASP A | 1 | 50.203 | 14.268 | 43.737 | O |
| ATOM | 5  | CB  | ASP A | 1 | 46.867 | 13.079 | 43.710 | C |
| ATOM | 6  | CG  | ASP A | 1 | 45.959 | 13.081 | 44.941 | C |
| ATOM | 7  | OD1 | ASP A | 1 | 46.113 | 13.966 | 45.765 | O |
| ATOM | 8  | OD2 | ASP A | 1 | 45.123 | 12.197 | 45.037 | O |
| ATOM | 9  | H1  | ASP A | 1 | 49.509 | 11.144 | 44.261 | H |
| ATOM | 10 | H2  | ASP A | 1 | 47.859 | 10.853 | 44.543 | H |
| ATOM | 11 | H3  | ASP A | 1 | 48.417 | 11.134 | 42.963 | H |
| ATOM | 12 | N   | GLY A | 2 | 49.057 | 13.633 | 41.972 | N |
| ATOM | 13 | CA  | GLY A | 2 | 49.956 | 14.390 | 41.057 | C |
| ATOM | 14 | C   | GLY A | 2 | 49.332 | 15.749 | 40.735 | C |
| ATOM | 15 | O   | GLY A | 2 | 48.151 | 15.961 | 40.924 | O |
| ATOM | 16 | H   | GLY A | 2 | 48.302 | 13.125 | 41.609 | H |
| ATOM | 17 | N   | SER A | 3 | 50.117 | 16.672 | 40.250 | N |
| ATOM | 18 | CA  | SER A | 3 | 49.570 | 18.019 | 39.918 | C |
| ATOM | 19 | C   | SER A | 3 | 48.271 | 17.881 | 39.119 | C |
| ATOM | 20 | O   | SER A | 3 | 48.008 | 16.860 | 38.515 | O |
| ATOM | 21 | CB  | SER A | 3 | 49.301 | 18.683 | 41.267 | C |
| ATOM | 22 | OG  | SER A | 3 | 49.845 | 19.995 | 41.260 | O |
| ATOM | 23 | H   | SER A | 3 | 51.068 | 16.480 | 40.106 | H |
| ATOM | 24 | HG  | SER A | 3 | 49.788 | 20.335 | 40.365 | H |
| ATOM | 25 | N   | CYS A | 4 | 47.457 | 18.901 | 39.111 | N |
| ATOM | 26 | CA  | CYS A | 4 | 46.175 | 18.830 | 38.352 | C |
| ATOM | 27 | C   | CYS A | 4 | 46.456 | 18.715 | 36.851 | C |
| ATOM | 28 | O   | CYS A | 4 | 47.386 | 18.053 | 36.436 | O |
| ATOM | 29 | CB  | CYS A | 4 | 45.475 | 17.573 | 38.870 | C |
| ATOM | 30 | SG  | CYS A | 4 | 43.907 | 18.032 | 39.648 | S |

|      |    |     |       |   |        |        |        |   |
|------|----|-----|-------|---|--------|--------|--------|---|
| ATOM | 31 | H   | CYS A | 4 | 47.689 | 19.715 | 39.606 | H |
| ATOM | 32 | N   | THR A | 5 | 45.650 | 19.344 | 36.038 | N |
| ATOM | 33 | CA  | THR A | 5 | 45.857 | 19.272 | 34.564 | C |
| ATOM | 34 | C   | THR A | 5 | 44.626 | 19.824 | 33.852 | C |
| ATOM | 35 | O   | THR A | 5 | 44.574 | 20.979 | 33.485 | O |
| ATOM | 36 | CB  | THR A | 5 | 47.075 | 20.150 | 34.265 | C |
| ATOM | 37 | OG1 | THR A | 5 | 48.191 | 19.691 | 35.015 | O |
| ATOM | 38 | CG2 | THR A | 5 | 47.395 | 20.076 | 32.770 | C |
| ATOM | 39 | H   | THR A | 5 | 44.898 | 19.862 | 36.397 | H |
| ATOM | 40 | HG1 | THR A | 5 | 48.689 | 19.082 | 34.465 | H |
| ATOM | 41 | N   | ASN A | 6 | 43.635 | 19.004 | 33.665 | N |
| ATOM | 42 | CA  | ASN A | 6 | 42.394 | 19.467 | 32.985 | C |
| ATOM | 43 | C   | ASN A | 6 | 42.713 | 19.903 | 31.547 | C |
| ATOM | 44 | O   | ASN A | 6 | 42.382 | 19.231 | 30.592 | O |
| ATOM | 45 | CB  | ASN A | 6 | 41.482 | 18.241 | 33.017 | C |
| ATOM | 46 | CG  | ASN A | 6 | 42.216 | 17.037 | 32.425 | C |
| ATOM | 47 | OD1 | ASN A | 6 | 42.975 | 17.171 | 31.486 | O |
| ATOM | 48 | ND2 | ASN A | 6 | 42.022 | 15.853 | 32.943 | N |
| ATOM | 49 | H   | ASN A | 6 | 43.701 | 18.079 | 33.980 | H |
| ATOM | 50 | HD2 | ASN A | 6 | 41.412 | 15.744 | 33.701 | H |
| ATOM | 51 | HD2 | ASN A | 6 | 42.489 | 15.075 | 32.572 | H |
| ATOM | 52 | N   | THR A | 7 | 43.366 | 21.028 | 31.401 | N |
| ATOM | 53 | CA  | THR A | 7 | 43.732 | 21.534 | 30.042 | C |
| ATOM | 54 | C   | THR A | 7 | 44.828 | 20.659 | 29.425 | C |
| ATOM | 55 | O   | THR A | 7 | 45.240 | 20.872 | 28.303 | O |
| ATOM | 56 | CB  | THR A | 7 | 42.449 | 21.456 | 29.210 | C |
| ATOM | 57 | OG1 | THR A | 7 | 41.352 | 21.915 | 29.989 | O |
| ATOM | 58 | CG2 | THR A | 7 | 42.597 | 22.332 | 27.967 | C |
| ATOM | 59 | H   | THR A | 7 | 43.625 | 21.543 | 32.193 | H |
| ATOM | 60 | HG1 | THR A | 7 | 41.567 | 22.790 | 30.317 | H |
| ATOM | 61 | N   | ASN A | 8 | 45.300 | 19.683 | 30.154 | N |
| ATOM | 62 | CA  | ASN A | 8 | 46.371 | 18.789 | 29.623 | C |
| ATOM | 63 | C   | ASN A | 8 | 46.647 | 17.666 | 30.627 | C |
| ATOM | 64 | O   | ASN A | 8 | 47.752 | 17.176 | 30.740 | O |
| ATOM | 65 | CB  | ASN A | 8 | 45.805 | 18.203 | 28.331 | C |
| ATOM | 66 | CG  | ASN A | 8 | 46.787 | 17.183 | 27.761 | C |

|      |     |     |     |   |    |        |        |        |   |
|------|-----|-----|-----|---|----|--------|--------|--------|---|
| ATOM | 67  | OD1 | ASN | A | 8  | 46.395 | 16.261 | 27.074 | O |
| ATOM | 68  | ND2 | ASN | A | 8  | 48.059 | 17.309 | 28.019 | N |
| ATOM | 69  | H   | ASN | A | 8  | 44.951 | 19.538 | 31.058 | H |
| ATOM | 70  | HD2 | ASN | A | 8  | 48.374 | 18.054 | 28.572 | H |
| ATOM | 71  | HD2 | ASN | A | 8  | 48.699 | 16.662 | 27.660 | H |
| ATOM | 72  | N   | SER | A | 9  | 45.640 | 17.262 | 31.355 | N |
| ATOM | 73  | CA  | SER | A | 9  | 45.812 | 16.174 | 32.362 | C |
| ATOM | 74  | C   | SER | A | 9  | 45.944 | 14.815 | 31.681 | C |
| ATOM | 75  | O   | SER | A | 9  | 46.927 | 14.527 | 31.026 | O |
| ATOM | 76  | CB  | SER | A | 9  | 47.092 | 16.516 | 33.126 | C |
| ATOM | 77  | OG  | SER | A | 9  | 46.894 | 16.260 | 34.509 | O |
| ATOM | 78  | H   | SER | A | 9  | 44.761 | 17.681 | 31.238 | H |
| ATOM | 79  | HG  | SER | A | 9  | 47.711 | 15.904 | 34.866 | H |
| ATOM | 80  | N   | GLN | A | 10 | 44.963 | 13.971 | 31.843 | N |
| ATOM | 81  | CA  | GLN | A | 10 | 45.029 | 12.622 | 31.224 | C |
| ATOM | 82  | C   | GLN | A | 10 | 44.484 | 11.584 | 32.201 | C |
| ATOM | 83  | O   | GLN | A | 10 | 43.887 | 10.599 | 31.812 | O |
| ATOM | 84  | CB  | GLN | A | 10 | 44.150 | 12.704 | 29.979 | C |
| ATOM | 85  | CG  | GLN | A | 10 | 44.858 | 11.997 | 28.826 | C |
| ATOM | 86  | CD  | GLN | A | 10 | 44.009 | 12.103 | 27.559 | C |
| ATOM | 87  | OE1 | GLN | A | 10 | 43.560 | 11.105 | 27.029 | O |
| ATOM | 88  | NE2 | GLN | A | 10 | 43.768 | 13.278 | 27.046 | N |
| ATOM | 89  | H   | GLN | A | 10 | 44.184 | 14.223 | 32.385 | H |
| ATOM | 90  | HE2 | GLN | A | 10 | 44.129 | 14.082 | 27.472 | H |
| ATOM | 91  | HE2 | GLN | A | 10 | 43.224 | 13.357 | 26.234 | H |
| ATOM | 92  | N   | LEU | A | 11 | 44.683 | 11.799 | 33.470 | N |
| ATOM | 93  | CA  | LEU | A | 11 | 44.176 | 10.827 | 34.476 | C |
| ATOM | 94  | C   | LEU | A | 11 | 44.564 | 9.406  | 34.069 | C |
| ATOM | 95  | O   | LEU | A | 11 | 45.729 | 9.059  | 34.042 | O |
| ATOM | 96  | CB  | LEU | A | 11 | 44.858 | 11.213 | 35.791 | C |
| ATOM | 97  | CG  | LEU | A | 11 | 44.107 | 12.370 | 36.459 | C |
| ATOM | 98  | CD1 | LEU | A | 11 | 42.606 | 12.082 | 36.477 | C |
| ATOM | 99  | CD2 | LEU | A | 11 | 44.365 | 13.661 | 35.682 | C |
| ATOM | 100 | H   | LEU | A | 11 | 45.166 | 12.600 | 33.761 | H |
| ATOM | 101 | N   | SER | A | 12 | 43.593 | 8.595  | 33.748 | N |
| ATOM | 102 | CA  | SER | A | 12 | 43.873 | 7.185  | 33.331 | C |

|      |     |     |       |    |        |        |        |   |
|------|-----|-----|-------|----|--------|--------|--------|---|
| ATOM | 103 | C   | SER A | 12 | 45.100 | 6.630  | 34.065 | C |
| ATOM | 104 | O   | SER A | 12 | 46.126 | 6.375  | 33.465 | O |
| ATOM | 105 | CB  | SER A | 12 | 42.621 | 6.405  | 33.724 | C |
| ATOM | 106 | OG  | SER A | 12 | 42.587 | 6.253  | 35.137 | O |
| ATOM | 107 | H   | SER A | 12 | 42.666 | 8.919  | 33.772 | H |
| ATOM | 108 | HG  | SER A | 12 | 42.220 | 7.058  | 35.513 | H |
| ATOM | 109 | N   | ALA A | 13 | 45.007 | 6.442  | 35.355 | N |
| ATOM | 110 | CA  | ALA A | 13 | 46.178 | 5.905  | 36.110 | C |
| ATOM | 111 | C   | ALA A | 13 | 45.844 | 5.766  | 37.598 | C |
| ATOM | 112 | O   | ALA A | 13 | 46.695 | 5.926  | 38.451 | O |
| ATOM | 113 | CB  | ALA A | 13 | 46.453 | 4.535  | 35.491 | C |
| ATOM | 114 | H   | ALA A | 13 | 44.174 | 6.654  | 35.824 | H |
| ATOM | 115 | N   | ASN A | 14 | 44.615 | 5.465  | 37.920 | N |
| ATOM | 116 | CA  | ASN A | 14 | 44.241 | 5.314  | 39.356 | C |
| ATOM | 117 | C   | ASN A | 14 | 43.259 | 6.413  | 39.769 | C |
| ATOM | 118 | O   | ASN A | 14 | 42.616 | 6.331  | 40.798 | O |
| ATOM | 119 | CB  | ASN A | 14 | 43.577 | 3.940  | 39.449 | C |
| ATOM | 120 | CG  | ASN A | 14 | 42.562 | 3.783  | 38.315 | C |
| ATOM | 121 | OD1 | ASN A | 14 | 42.096 | 4.760  | 37.762 | O |
| ATOM | 122 | ND2 | ASN A | 14 | 42.196 | 2.587  | 37.945 | N |
| ATOM | 123 | H   | ASN A | 14 | 43.941 | 5.336  | 37.220 | H |
| ATOM | 124 | HD2 | ASN A | 14 | 42.571 | 1.799  | 38.391 | H |
| ATOM | 125 | HD2 | ASN A | 14 | 41.548 | 2.475  | 37.219 | H |
| ATOM | 126 | N   | SER A | 15 | 43.141 | 7.443  | 38.980 | N |
| ATOM | 127 | CA  | SER A | 15 | 42.202 | 8.548  | 39.331 | C |
| ATOM | 128 | C   | SER A | 15 | 42.707 | 9.302  | 40.562 | C |
| ATOM | 129 | O   | SER A | 15 | 43.656 | 8.898  | 41.206 | O |
| ATOM | 130 | CB  | SER A | 15 | 42.197 | 9.466  | 38.111 | C |
| ATOM | 131 | OG  | SER A | 15 | 41.614 | 10.711 | 38.470 | O |
| ATOM | 132 | H   | SER A | 15 | 43.670 | 7.492  | 38.155 | H |
| ATOM | 133 | HG  | SER A | 15 | 42.301 | 11.258 | 38.861 | H |
| ATOM | 134 | N   | LYS A | 16 | 42.083 | 10.400 | 40.889 | N |
| ATOM | 135 | CA  | LYS A | 16 | 42.526 | 11.188 | 42.074 | C |
| ATOM | 136 | C   | LYS A | 16 | 42.362 | 12.686 | 41.797 | C |
| ATOM | 137 | O   | LYS A | 16 | 41.413 | 13.109 | 41.168 | O |
| ATOM | 138 | CB  | LYS A | 16 | 41.605 | 10.750 | 43.214 | C |

|      |     |     |       |    |        |        |        |   |
|------|-----|-----|-------|----|--------|--------|--------|---|
| ATOM | 139 | CG  | LYS A | 16 | 42.436 | 10.497 | 44.472 | C |
| ATOM | 140 | CD  | LYS A | 16 | 41.809 | 11.236 | 45.656 | C |
| ATOM | 141 | CE  | LYS A | 16 | 42.645 | 10.987 | 46.914 | C |
| ATOM | 142 | NZ  | LYS A | 16 | 42.423 | 9.552  | 47.244 | N |
| ATOM | 143 | H   | LYS A | 16 | 41.323 | 10.710 | 40.353 | H |
| ATOM | 144 | HZ1 | LYS A | 16 | 42.660 | 9.386  | 48.242 | H |
| ATOM | 145 | HZ2 | LYS A | 16 | 41.425 | 9.309  | 47.079 | H |
| ATOM | 146 | HZ3 | LYS A | 16 | 43.029 | 8.960  | 46.641 | H |
| ATOM | 147 | N   | CYS A | 17 | 43.279 | 13.487 | 42.261 | N |
| ATOM | 148 | CA  | CYS A | 17 | 43.177 | 14.956 | 42.024 | C |
| ATOM | 149 | C   | CYS A | 17 | 43.909 | 15.718 | 43.130 | C |
| ATOM | 150 | O   | CYS A | 17 | 45.064 | 15.467 | 43.410 | O |
| ATOM | 151 | CB  | CYS A | 17 | 43.854 | 15.185 | 40.671 | C |
| ATOM | 152 | SG  | CYS A | 17 | 42.847 | 16.313 | 39.676 | S |
| ATOM | 153 | H   | CYS A | 17 | 44.037 | 13.124 | 42.766 | H |
| ATOM | 154 | N   | GLU A | 18 | 43.245 | 16.647 | 43.764 | N |
| ATOM | 155 | CA  | GLU A | 18 | 43.905 | 17.418 | 44.854 | C |
| ATOM | 156 | C   | GLU A | 18 | 43.792 | 18.922 | 44.589 | C |
| ATOM | 157 | O   | GLU A | 18 | 44.770 | 19.642 | 44.618 | O |
| ATOM | 158 | CB  | GLU A | 18 | 43.141 | 17.038 | 46.124 | C |
| ATOM | 159 | CG  | GLU A | 18 | 43.914 | 15.959 | 46.881 | C |
| ATOM | 160 | CD  | GLU A | 18 | 44.886 | 16.619 | 47.861 | C |
| ATOM | 161 | OE1 | GLU A | 18 | 44.879 | 17.837 | 47.939 | O |
| ATOM | 162 | OE2 | GLU A | 18 | 45.619 | 15.899 | 48.516 | O |
| ATOM | 163 | H   | GLU A | 18 | 42.313 | 16.832 | 43.525 | H |
| ATOM | 164 | N   | LYS A | 19 | 42.604 | 19.404 | 44.336 | N |
| ATOM | 165 | CA  | LYS A | 19 | 42.435 | 20.863 | 44.075 | C |
| ATOM | 166 | C   | LYS A | 19 | 41.097 | 21.129 | 43.382 | C |
| ATOM | 167 | O   | LYS A | 19 | 40.290 | 21.910 | 43.849 | O |
| ATOM | 168 | CB  | LYS A | 19 | 42.460 | 21.516 | 45.456 | C |
| ATOM | 169 | CG  | LYS A | 19 | 41.275 | 21.006 | 46.280 | C |
| ATOM | 170 | CD  | LYS A | 19 | 40.676 | 22.162 | 47.083 | C |
| ATOM | 171 | CE  | LYS A | 19 | 41.491 | 22.371 | 48.361 | C |
| ATOM | 172 | NZ  | LYS A | 19 | 41.774 | 23.833 | 48.402 | N |
| ATOM | 173 | H   | LYS A | 19 | 41.827 | 18.809 | 44.319 | H |
| ATOM | 174 | HZ1 | LYS A | 19 | 40.946 | 24.356 | 48.056 | H |

|      |     |     |     |   |    |        |        |        |   |
|------|-----|-----|-----|---|----|--------|--------|--------|---|
| ATOM | 175 | HZ2 | LYS | A | 19 | 41.982 | 24.118 | 49.381 | H |
| ATOM | 176 | HZ3 | LYS | A | 19 | 42.592 | 24.045 | 47.798 | H |
| ATOM | 177 | N   | SER | A | 20 | 40.854 | 20.490 | 42.270 | N |
| ATOM | 178 | CA  | SER | A | 20 | 39.569 | 20.711 | 41.550 | C |
| ATOM | 179 | C   | SER | A | 20 | 39.786 | 21.659 | 40.366 | C |
| ATOM | 180 | O   | SER | A | 20 | 40.844 | 22.234 | 40.206 | O |
| ATOM | 181 | CB  | SER | A | 20 | 39.143 | 19.329 | 41.059 | C |
| ATOM | 182 | OG  | SER | A | 20 | 39.906 | 18.983 | 39.910 | O |
| ATOM | 183 | H   | SER | A | 20 | 41.519 | 19.866 | 41.909 | H |
| ATOM | 184 | HG  | SER | A | 20 | 40.771 | 18.687 | 40.206 | H |
| ATOM | 185 | N   | THR | A | 21 | 38.794 | 21.826 | 39.536 | N |
| ATOM | 186 | CA  | THR | A | 21 | 38.946 | 22.735 | 38.365 | C |
| ATOM | 187 | C   | THR | A | 21 | 38.381 | 22.071 | 37.106 | C |
| ATOM | 188 | O   | THR | A | 21 | 37.422 | 22.536 | 36.524 | O |
| ATOM | 189 | CB  | THR | A | 21 | 38.138 | 23.983 | 38.726 | C |
| ATOM | 190 | OG1 | THR | A | 21 | 38.343 | 24.298 | 40.096 | O |
| ATOM | 191 | CG2 | THR | A | 21 | 38.592 | 25.158 | 37.857 | C |
| ATOM | 192 | H   | THR | A | 21 | 37.948 | 21.353 | 39.682 | H |
| ATOM | 193 | HG1 | THR | A | 21 | 37.798 | 25.058 | 40.311 | H |
| ATOM | 194 | N   | LEU | A | 22 | 38.969 | 20.983 | 36.687 | N |
| ATOM | 195 | CA  | LEU | A | 22 | 38.467 | 20.284 | 35.469 | C |
| ATOM | 196 | C   | LEU | A | 22 | 38.948 | 20.997 | 34.203 | C |
| ATOM | 197 | O   | LEU | A | 22 | 39.633 | 21.998 | 34.264 | O |
| ATOM | 198 | CB  | LEU | A | 22 | 39.064 | 18.874 | 35.544 | C |
| ATOM | 199 | CG  | LEU | A | 22 | 38.964 | 18.327 | 36.973 | C |
| ATOM | 200 | CD1 | LEU | A | 22 | 39.045 | 16.800 | 36.927 | C |
| ATOM | 201 | CD2 | LEU | A | 22 | 37.631 | 18.737 | 37.607 | C |
| ATOM | 202 | H   | LEU | A | 22 | 39.739 | 20.624 | 37.174 | H |
| ATOM | 203 | N   | THR | A | 23 | 38.599 | 20.481 | 33.055 | N |
| ATOM | 204 | CA  | THR | A | 23 | 39.038 | 21.120 | 31.780 | C |
| ATOM | 205 | C   | THR | A | 23 | 38.850 | 20.147 | 30.613 | C |
| ATOM | 206 | O   | THR | A | 23 | 37.752 | 19.714 | 30.323 | O |
| ATOM | 207 | CB  | THR | A | 23 | 38.133 | 22.339 | 31.610 | C |
| ATOM | 208 | OG1 | THR | A | 23 | 38.449 | 23.305 | 32.607 | O |
| ATOM | 209 | CG2 | THR | A | 23 | 38.343 | 22.939 | 30.216 | C |
| ATOM | 210 | H   | THR | A | 23 | 38.048 | 19.670 | 33.031 | H |

|      |     |     |     |   |    |        |        |        |   |
|------|-----|-----|-----|---|----|--------|--------|--------|---|
| ATOM | 211 | HG1 | THR | A | 23 | 38.708 | 24.118 | 32.167 | H |
| ATOM | 212 | N   | ASN | A | 24 | 39.912 | 19.797 | 29.944 | N |
| ATOM | 213 | CA  | ASN | A | 24 | 39.794 | 18.850 | 28.799 | C |
| ATOM | 214 | C   | ASN | A | 24 | 39.169 | 17.536 | 29.273 | C |
| ATOM | 215 | O   | ASN | A | 24 | 38.277 | 17.002 | 28.646 | O |
| ATOM | 216 | CB  | ASN | A | 24 | 38.876 | 19.545 | 27.793 | C |
| ATOM | 217 | CG  | ASN | A | 24 | 39.722 | 20.314 | 26.776 | C |
| ATOM | 218 | OD1 | ASN | A | 24 | 39.542 | 21.501 | 26.594 | O |
| ATOM | 219 | ND2 | ASN | A | 24 | 40.645 | 19.683 | 26.104 | N |
| ATOM | 220 | H   | ASN | A | 24 | 40.790 | 20.154 | 30.195 | H |
| ATOM | 221 | HD2 | ASN | A | 24 | 40.789 | 18.725 | 26.251 | H |
| ATOM | 222 | HD2 | ASN | A | 24 | 41.192 | 20.166 | 25.450 | H |
| ATOM | 223 | N   | CYS | A | 25 | 39.626 | 17.017 | 30.378 | N |
| ATOM | 224 | CA  | CYS | A | 25 | 39.049 | 15.745 | 30.890 | C |
| ATOM | 225 | C   | CYS | A | 25 | 40.014 | 14.580 | 30.664 | C |
| ATOM | 226 | O   | CYS | A | 25 | 40.861 | 14.608 | 29.793 | O |
| ATOM | 227 | CB  | CYS | A | 25 | 38.844 | 15.965 | 32.392 | C |
| ATOM | 228 | SG  | CYS | A | 25 | 37.096 | 15.739 | 32.808 | S |
| ATOM | 229 | H   | CYS | A | 25 | 40.344 | 17.466 | 30.872 | H |
| ATOM | 230 | N   | TYR | A | 26 | 39.881 | 13.564 | 31.462 | N |
| ATOM | 231 | CA  | TYR | A | 26 | 40.760 | 12.372 | 31.352 | C |
| ATOM | 232 | C   | TYR | A | 26 | 40.549 | 11.530 | 32.605 | C |
| ATOM | 233 | O   | TYR | A | 26 | 41.477 | 11.024 | 33.202 | O |
| ATOM | 234 | CB  | TYR | A | 26 | 40.280 | 11.634 | 30.100 | C |
| ATOM | 235 | CG  | TYR | A | 26 | 40.761 | 10.203 | 30.135 | C |
| ATOM | 236 | CD1 | TYR | A | 26 | 40.046 | 9.242  | 30.859 | C |
| ATOM | 237 | CD2 | TYR | A | 26 | 41.919 | 9.838  | 29.440 | C |
| ATOM | 238 | CE1 | TYR | A | 26 | 40.491 | 7.915  | 30.887 | C |
| ATOM | 239 | CE2 | TYR | A | 26 | 42.364 | 8.511  | 29.470 | C |
| ATOM | 240 | CZ  | TYR | A | 26 | 41.649 | 7.549  | 30.193 | C |
| ATOM | 241 | OH  | TYR | A | 26 | 42.087 | 6.241  | 30.221 | O |
| ATOM | 242 | H   | TYR | A | 26 | 39.188 | 13.584 | 32.154 | H |
| ATOM | 243 | HH  | TYR | A | 26 | 42.132 | 5.963  | 31.139 | H |
| ATOM | 244 | N   | VAL | A | 27 | 39.317 | 11.427 | 33.018 | N |
| ATOM | 245 | CA  | VAL | A | 27 | 38.981 | 10.672 | 34.254 | C |
| ATOM | 246 | C   | VAL | A | 27 | 39.520 | 9.239  | 34.209 | C |

|      |     |     |       |    |        |        |        |   |
|------|-----|-----|-------|----|--------|--------|--------|---|
| ATOM | 247 | O   | VAL A | 27 | 40.535 | 8.953  | 33.607 | O |
| ATOM | 248 | CB  | VAL A | 27 | 39.643 | 11.466 | 35.377 | C |
| ATOM | 249 | CG1 | VAL A | 27 | 39.126 | 10.962 | 36.728 | C |
| ATOM | 250 | CG2 | VAL A | 27 | 39.304 | 12.957 | 35.214 | C |
| ATOM | 251 | H   | VAL A | 27 | 38.606 | 11.878 | 32.522 | H |
| ATOM | 252 | N   | ASP A | 28 | 38.833 | 8.343  | 34.859 | N |
| ATOM | 253 | CA  | ASP A | 28 | 39.271 | 6.918  | 34.893 | C |
| ATOM | 254 | C   | ASP A | 28 | 38.681 | 6.247  | 36.134 | C |
| ATOM | 255 | O   | ASP A | 28 | 37.481 | 6.232  | 36.327 | O |
| ATOM | 256 | CB  | ASP A | 28 | 38.706 | 6.293  | 33.618 | C |
| ATOM | 257 | CG  | ASP A | 28 | 39.582 | 5.112  | 33.194 | C |
| ATOM | 258 | OD1 | ASP A | 28 | 39.866 | 4.280  | 34.039 | O |
| ATOM | 259 | OD2 | ASP A | 28 | 39.953 | 5.061  | 32.034 | O |
| ATOM | 260 | H   | ASP A | 28 | 38.022 | 8.611  | 35.339 | H |
| ATOM | 261 | N   | LYS A | 29 | 39.504 | 5.703  | 36.987 | N |
| ATOM | 262 | CA  | LYS A | 29 | 38.965 | 5.055  | 38.216 | C |
| ATOM | 263 | C   | LYS A | 29 | 37.986 | 6.007  | 38.910 | C |
| ATOM | 264 | O   | LYS A | 29 | 36.848 | 5.669  | 39.159 | O |
| ATOM | 265 | CB  | LYS A | 29 | 38.237 | 3.804  | 37.721 | C |
| ATOM | 266 | CG  | LYS A | 29 | 39.236 | 2.862  | 37.046 | C |
| ATOM | 267 | CD  | LYS A | 29 | 38.486 | 1.891  | 36.133 | C |
| ATOM | 268 | CE  | LYS A | 29 | 37.978 | 0.703  | 36.955 | C |
| ATOM | 269 | NZ  | LYS A | 29 | 38.969 | -0.383 | 36.717 | N |
| ATOM | 270 | H   | LYS A | 29 | 40.471 | 5.732  | 36.826 | H |
| ATOM | 271 | HZ1 | LYS A | 29 | 39.875 | 0.031  | 36.420 | H |
| ATOM | 272 | HZ2 | LYS A | 29 | 39.107 | -0.924 | 37.596 | H |
| ATOM | 273 | HZ3 | LYS A | 29 | 38.618 | -1.016 | 35.970 | H |
| ATOM | 274 | N   | SER A | 30 | 38.417 | 7.201  | 39.215 | N |
| ATOM | 275 | CA  | SER A | 30 | 37.505 | 8.174  | 39.883 | C |
| ATOM | 276 | C   | SER A | 30 | 38.274 | 9.010  | 40.908 | C |
| ATOM | 277 | O   | SER A | 30 | 39.443 | 8.789  | 41.153 | O |
| ATOM | 278 | CB  | SER A | 30 | 36.983 | 9.060  | 38.754 | C |
| ATOM | 279 | OG  | SER A | 30 | 36.089 | 8.307  | 37.943 | O |
| ATOM | 280 | H   | SER A | 30 | 39.337 | 7.459  | 39.001 | H |
| ATOM | 281 | HG  | SER A | 30 | 36.610 | 7.709  | 37.402 | H |
| ATOM | 282 | N   | GLU A | 31 | 37.624 | 9.969  | 41.513 | N |



|      |     |     |       |    |        |        |        |   |
|------|-----|-----|-------|----|--------|--------|--------|---|
| ATOM | 283 | CA  | GLU A | 31 | 38.317 | 10.816 | 42.526 | C |
| ATOM | 284 | C   | GLU A | 31 | 38.126 | 12.303 | 42.207 | C |
| ATOM | 285 | O   | GLU A | 31 | 39.063 | 12.999 | 41.873 | O |
| ATOM | 286 | CB  | GLU A | 31 | 37.651 | 10.464 | 43.858 | C |
| ATOM | 287 | CG  | GLU A | 31 | 38.362 | 9.261  | 44.482 | C |
| ATOM | 288 | CD  | GLU A | 31 | 37.374 | 8.476  | 45.348 | C |
| ATOM | 289 | OE1 | GLU A | 31 | 37.227 | 8.825  | 46.507 | O |
| ATOM | 290 | OE2 | GLU A | 31 | 36.783 | 7.539  | 44.836 | O |
| ATOM | 291 | H   | GLU A | 31 | 36.680 | 10.129 | 41.304 | H |
| ATOM | 292 | N   | VAL A | 32 | 36.921 | 12.795 | 42.314 | N |
| ATOM | 293 | CA  | VAL A | 32 | 36.673 | 14.239 | 42.023 | C |
| ATOM | 294 | C   | VAL A | 32 | 37.449 | 15.118 | 43.004 | C |
| ATOM | 295 | O   | VAL A | 32 | 38.462 | 14.718 | 43.546 | O |
| ATOM | 296 | CB  | VAL A | 32 | 37.171 | 14.451 | 40.594 | C |
| ATOM | 297 | CG1 | VAL A | 32 | 36.669 | 15.801 | 40.079 | C |
| ATOM | 298 | CG2 | VAL A | 32 | 36.632 | 13.335 | 39.698 | C |
| ATOM | 299 | H   | VAL A | 32 | 36.180 | 12.217 | 42.590 | H |
| ATOM | 300 | N   | TYR A | 33 | 36.978 | 16.312 | 43.243 | N |
| ATOM | 301 | CA  | TYR A | 33 | 37.683 | 17.216 | 44.196 | C |
| ATOM | 302 | C   | TYR A | 33 | 37.465 | 18.679 | 43.798 | C |
| ATOM | 303 | O   | TYR A | 33 | 38.377 | 19.480 | 43.819 | O |
| ATOM | 304 | CB  | TYR A | 33 | 37.043 | 16.929 | 45.555 | C |
| ATOM | 305 | CG  | TYR A | 33 | 37.734 | 15.750 | 46.197 | C |
| ATOM | 306 | CD1 | TYR A | 33 | 38.862 | 15.953 | 47.001 | C |
| ATOM | 307 | CD2 | TYR A | 33 | 37.245 | 14.454 | 45.989 | C |
| ATOM | 308 | CE1 | TYR A | 33 | 39.502 | 14.859 | 47.596 | C |
| ATOM | 309 | CE2 | TYR A | 33 | 37.887 | 13.361 | 46.584 | C |
| ATOM | 310 | CZ  | TYR A | 33 | 39.015 | 13.563 | 47.387 | C |
| ATOM | 311 | OH  | TYR A | 33 | 39.647 | 12.486 | 47.974 | O |
| ATOM | 312 | H   | TYR A | 33 | 36.157 | 16.610 | 42.800 | H |
| ATOM | 313 | HH  | TYR A | 33 | 39.671 | 12.637 | 48.922 | H |
| ATOM | 314 | N   | GLY A | 34 | 36.261 | 19.032 | 43.438 | N |
| ATOM | 315 | CA  | GLY A | 34 | 35.985 | 20.442 | 43.039 | C |
| ATOM | 316 | C   | GLY A | 34 | 35.074 | 20.454 | 41.811 | C |
| ATOM | 317 | O   | GLY A | 34 | 34.349 | 21.399 | 41.572 | O |
| ATOM | 318 | H   | GLY A | 34 | 35.538 | 18.370 | 43.428 | H |

|      |     |     |       |    |        |        |        |   |
|------|-----|-----|-------|----|--------|--------|--------|---|
| ATOM | 319 | N   | THR A | 35 | 35.101 | 19.407 | 41.033 | N |
| ATOM | 320 | CA  | THR A | 35 | 34.233 | 19.354 | 39.821 | C |
| ATOM | 321 | C   | THR A | 35 | 34.752 | 20.314 | 38.747 | C |
| ATOM | 322 | O   | THR A | 35 | 35.932 | 20.592 | 38.666 | O |
| ATOM | 323 | CB  | THR A | 35 | 34.324 | 17.907 | 39.334 | C |
| ATOM | 324 | OG1 | THR A | 35 | 33.585 | 17.067 | 40.208 | O |
| ATOM | 325 | CG2 | THR A | 35 | 33.748 | 17.808 | 37.920 | C |
| ATOM | 326 | H   | THR A | 35 | 35.690 | 18.654 | 41.247 | H |
| ATOM | 327 | HG1 | THR A | 35 | 34.049 | 17.033 | 41.048 | H |
| ATOM | 328 | N   | THR A | 36 | 33.879 | 20.818 | 37.918 | N |
| ATOM | 329 | CA  | THR A | 36 | 34.320 | 21.753 | 36.845 | C |
| ATOM | 330 | C   | THR A | 36 | 34.219 | 21.066 | 35.479 | C |
| ATOM | 331 | O   | THR A | 36 | 33.567 | 21.551 | 34.577 | O |
| ATOM | 332 | CB  | THR A | 36 | 33.355 | 22.938 | 36.924 | C |
| ATOM | 333 | OG1 | THR A | 36 | 33.366 | 23.467 | 38.243 | O |
| ATOM | 334 | CG2 | THR A | 36 | 33.788 | 24.021 | 35.934 | C |
| ATOM | 335 | H   | THR A | 36 | 32.932 | 20.577 | 37.999 | H |
| ATOM | 336 | HG1 | THR A | 36 | 34.230 | 23.294 | 38.627 | H |
| ATOM | 337 | N   | CYS A | 37 | 34.859 | 19.938 | 35.328 | N |
| ATOM | 338 | CA  | CYS A | 37 | 34.806 | 19.208 | 34.026 | C |
| ATOM | 339 | C   | CYS A | 37 | 34.891 | 20.195 | 32.859 | C |
| ATOM | 340 | O   | CYS A | 37 | 35.626 | 21.159 | 32.901 | O |
| ATOM | 341 | CB  | CYS A | 37 | 36.027 | 18.288 | 34.046 | C |
| ATOM | 342 | SG  | CYS A | 37 | 36.250 | 17.532 | 32.416 | S |
| ATOM | 343 | H   | CYS A | 37 | 35.374 | 19.568 | 36.073 | H |
| ATOM | 344 | N   | THR A | 38 | 34.142 | 19.959 | 31.816 | N |
| ATOM | 345 | CA  | THR A | 38 | 34.178 | 20.883 | 30.645 | C |
| ATOM | 346 | C   | THR A | 38 | 34.530 | 20.103 | 29.376 | C |
| ATOM | 347 | O   | THR A | 38 | 34.384 | 20.590 | 28.273 | O |
| ATOM | 348 | CB  | THR A | 38 | 32.764 | 21.458 | 30.549 | C |
| ATOM | 349 | OG1 | THR A | 38 | 32.466 | 22.177 | 31.739 | O |
| ATOM | 350 | CG2 | THR A | 38 | 32.672 | 22.395 | 29.343 | C |
| ATOM | 351 | H   | THR A | 38 | 33.554 | 19.176 | 31.803 | H |
| ATOM | 352 | HG1 | THR A | 38 | 31.963 | 22.957 | 31.497 | H |
| ATOM | 353 | N   | GLY A | 39 | 34.991 | 18.893 | 29.529 | N |
| ATOM | 354 | CA  | GLY A | 39 | 35.353 | 18.072 | 28.345 | C |

|      |     |     |       |    |        |        |        |   |
|------|-----|-----|-------|----|--------|--------|--------|---|
| ATOM | 355 | C   | GLY A | 39 | 34.660 | 16.711 | 28.445 | C |
| ATOM | 356 | O   | GLY A | 39 | 33.996 | 16.270 | 27.529 | O |
| ATOM | 357 | H   | GLY A | 39 | 35.099 | 18.523 | 30.427 | H |
| ATOM | 358 | N   | SER A | 40 | 34.812 | 16.043 | 29.559 | N |
| ATOM | 359 | CA  | SER A | 40 | 34.161 | 14.710 | 29.728 | C |
| ATOM | 360 | C   | SER A | 40 | 35.152 | 13.711 | 30.332 | C |
| ATOM | 361 | O   | SER A | 40 | 36.334 | 13.973 | 30.428 | O |
| ATOM | 362 | CB  | SER A | 40 | 33.000 | 14.959 | 30.689 | C |
| ATOM | 363 | OG  | SER A | 40 | 32.432 | 16.235 | 30.420 | O |
| ATOM | 364 | H   | SER A | 40 | 35.350 | 16.421 | 30.285 | H |
| ATOM | 365 | HG  | SER A | 40 | 31.598 | 16.292 | 30.889 | H |
| ATOM | 366 | N   | ARG A | 41 | 34.677 | 12.565 | 30.740 | N |
| ATOM | 367 | CA  | ARG A | 41 | 35.590 | 11.548 | 31.338 | C |
| ATOM | 368 | C   | ARG A | 41 | 34.853 | 10.739 | 32.410 | C |
| ATOM | 369 | O   | ARG A | 41 | 33.650 | 10.840 | 32.560 | O |
| ATOM | 370 | CB  | ARG A | 41 | 35.996 | 10.646 | 30.172 | C |
| ATOM | 371 | CG  | ARG A | 41 | 34.823 | 9.740  | 29.790 | C |
| ATOM | 372 | CD  | ARG A | 41 | 35.063 | 8.334  | 30.349 | C |
| ATOM | 373 | NE  | ARG A | 41 | 34.333 | 7.423  | 29.422 | N |
| ATOM | 374 | CZ  | ARG A | 41 | 34.858 | 6.276  | 29.085 | C |
| ATOM | 375 | NH1 | ARG A | 41 | 36.127 | 6.202  | 28.788 | N |
| ATOM | 376 | NH2 | ARG A | 41 | 34.115 | 5.205  | 29.045 | N |
| ATOM | 377 | H   | ARG A | 41 | 33.720 | 12.373 | 30.654 | H |
| ATOM | 378 | HE  | ARG A | 41 | 33.460 | 7.686  | 29.063 | H |
| ATOM | 379 | HH1 | ARG A | 41 | 36.696 | 7.024  | 28.817 | H |
| ATOM | 380 | HH1 | ARG A | 41 | 36.530 | 5.323  | 28.532 | H |
| ATOM | 381 | HH2 | ARG A | 41 | 33.143 | 5.262  | 29.272 | H |
| ATOM | 382 | HH2 | ARG A | 41 | 34.517 | 4.326  | 28.790 | H |
| ATOM | 383 | N   | PHE A | 42 | 35.562 | 9.937  | 33.155 | N |
| ATOM | 384 | CA  | PHE A | 42 | 34.900 | 9.119  | 34.214 | C |
| ATOM | 385 | C   | PHE A | 42 | 35.344 | 7.658  | 34.105 | C |
| ATOM | 386 | O   | PHE A | 42 | 36.151 | 7.306  | 33.268 | O |
| ATOM | 387 | CB  | PHE A | 42 | 35.368 | 9.724  | 35.537 | C |
| ATOM | 388 | CG  | PHE A | 42 | 35.052 | 11.200 | 35.554 | C |
| ATOM | 389 | CD1 | PHE A | 42 | 33.804 | 11.656 | 35.111 | C |
| ATOM | 390 | CD2 | PHE A | 42 | 36.008 | 12.115 | 36.013 | C |

|      |     |     |     |   |    |        |        |        |   |
|------|-----|-----|-----|---|----|--------|--------|--------|---|
| ATOM | 391 | CE1 | PHE | A | 42 | 33.512 | 13.025 | 35.127 | C |
| ATOM | 392 | CE2 | PHE | A | 42 | 35.716 | 13.483 | 36.028 | C |
| ATOM | 393 | CZ  | PHE | A | 42 | 34.469 | 13.937 | 35.585 | C |
| ATOM | 394 | H   | PHE | A | 42 | 36.530 | 9.867  | 33.018 | H |
| ATOM | 395 | N   | ASP | A | 43 | 34.823 | 6.806  | 34.943 | N |
| ATOM | 396 | CA  | ASP | A | 43 | 35.217 | 5.370  | 34.884 | C |
| ATOM | 397 | C   | ASP | A | 43 | 34.688 | 4.626  | 36.110 | C |
| ATOM | 398 | O   | ASP | A | 43 | 33.845 | 3.757  | 36.007 | O |
| ATOM | 399 | CB  | ASP | A | 43 | 34.569 | 4.831  | 33.608 | C |
| ATOM | 400 | CG  | ASP | A | 43 | 35.554 | 3.909  | 32.886 | C |
| ATOM | 401 | OD1 | ASP | A | 43 | 35.991 | 2.947  | 33.498 | O |
| ATOM | 402 | OD2 | ASP | A | 43 | 35.856 | 4.180  | 31.735 | O |
| ATOM | 403 | H   | ASP | A | 43 | 34.173 | 7.110  | 35.611 | H |
| ATOM | 404 | N   | GLY | A | 44 | 35.180 | 4.960  | 37.271 | N |
| ATOM | 405 | CA  | GLY | A | 44 | 34.708 | 4.271  | 38.501 | C |
| ATOM | 406 | C   | GLY | A | 44 | 33.742 | 5.177  | 39.258 | C |
| ATOM | 407 | O   | GLY | A | 44 | 32.663 | 4.770  | 39.634 | O |
| ATOM | 408 | H   | GLY | A | 44 | 35.861 | 5.662  | 37.332 | H |
| ATOM | 409 | N   | VAL | A | 45 | 34.102 | 6.408  | 39.481 | N |
| ATOM | 410 | CA  | VAL | A | 45 | 33.166 | 7.313  | 40.204 | C |
| ATOM | 411 | C   | VAL | A | 45 | 33.845 | 7.945  | 41.422 | C |
| ATOM | 412 | O   | VAL | A | 45 | 34.980 | 7.654  | 41.743 | O |
| ATOM | 413 | CB  | VAL | A | 45 | 32.755 | 8.389  | 39.180 | C |
| ATOM | 414 | CG1 | VAL | A | 45 | 32.729 | 7.784  | 37.772 | C |
| ATOM | 415 | CG2 | VAL | A | 45 | 33.746 | 9.554  | 39.211 | C |
| ATOM | 416 | H   | VAL | A | 45 | 34.972 | 6.739  | 39.168 | H |
| ATOM | 417 | N   | THR | A | 46 | 33.143 | 8.811  | 42.091 | N |
| ATOM | 418 | CA  | THR | A | 46 | 33.709 | 9.485  | 43.290 | C |
| ATOM | 419 | C   | THR | A | 46 | 33.026 | 10.839 | 43.467 | C |
| ATOM | 420 | O   | THR | A | 46 | 32.453 | 11.130 | 44.498 | O |
| ATOM | 421 | CB  | THR | A | 46 | 33.371 | 8.556  | 44.452 | C |
| ATOM | 422 | OG1 | THR | A | 46 | 34.046 | 7.317  | 44.279 | O |
| ATOM | 423 | CG2 | THR | A | 46 | 33.807 | 9.199  | 45.770 | C |
| ATOM | 424 | H   | THR | A | 46 | 32.231 | 9.023  | 41.802 | H |
| ATOM | 425 | HG1 | THR | A | 46 | 33.548 | 6.640  | 44.744 | H |
| ATOM | 426 | N   | ILE | A | 47 | 33.063 | 11.662 | 42.455 | N |

|      |     |     |       |    |        |        |        |   |
|------|-----|-----|-------|----|--------|--------|--------|---|
| ATOM | 427 | CA  | ILE A | 47 | 32.395 | 12.988 | 42.549 | C |
| ATOM | 428 | C   | ILE A | 47 | 33.290 | 14.001 | 43.268 | C |
| ATOM | 429 | O   | ILE A | 47 | 34.426 | 13.724 | 43.594 | O |
| ATOM | 430 | CB  | ILE A | 47 | 32.155 | 13.404 | 41.094 | C |
| ATOM | 431 | CG1 | ILE A | 47 | 31.471 | 14.773 | 41.054 | C |
| ATOM | 432 | CG2 | ILE A | 47 | 33.493 | 13.483 | 40.356 | C |
| ATOM | 433 | CD1 | ILE A | 47 | 30.749 | 14.946 | 39.717 | C |
| ATOM | 434 | H   | ILE A | 47 | 33.516 | 11.398 | 41.626 | H |
| ATOM | 435 | N   | THR A | 48 | 32.776 | 15.173 | 43.522 | N |
| ATOM | 436 | CA  | THR A | 48 | 33.578 | 16.217 | 44.220 | C |
| ATOM | 437 | C   | THR A | 48 | 33.182 | 17.602 | 43.687 | C |
| ATOM | 438 | O   | THR A | 48 | 33.023 | 17.790 | 42.498 | O |
| ATOM | 439 | CB  | THR A | 48 | 33.209 | 16.068 | 45.699 | C |
| ATOM | 440 | OG1 | THR A | 48 | 31.798 | 16.166 | 45.844 | O |
| ATOM | 441 | CG2 | THR A | 48 | 33.689 | 14.706 | 46.206 | C |
| ATOM | 442 | H   | THR A | 48 | 31.854 | 15.369 | 43.257 | H |
| ATOM | 443 | HG1 | THR A | 48 | 31.503 | 15.447 | 46.408 | H |
| ATOM | 444 | N   | THR A | 49 | 33.015 | 18.566 | 44.549 | N |
| ATOM | 445 | CA  | THR A | 49 | 32.621 | 19.923 | 44.075 | C |
| ATOM | 446 | C   | THR A | 49 | 31.302 | 19.847 | 43.309 | C |
| ATOM | 447 | O   | THR A | 49 | 30.253 | 20.109 | 43.856 | O |
| ATOM | 448 | CB  | THR A | 49 | 32.429 | 20.743 | 45.347 | C |
| ATOM | 449 | OG1 | THR A | 49 | 33.656 | 20.805 | 46.062 | O |
| ATOM | 450 | CG2 | THR A | 49 | 31.974 | 22.154 | 44.976 | C |
| ATOM | 451 | H   | THR A | 49 | 33.140 | 18.400 | 45.505 | H |
| ATOM | 452 | HG1 | THR A | 49 | 34.113 | 19.970 | 45.937 | H |
| ATOM | 453 | N   | SER A | 50 | 31.334 | 19.492 | 42.057 | N |
| ATOM | 454 | CA  | SER A | 50 | 30.060 | 19.404 | 41.287 | C |
| ATOM | 455 | C   | SER A | 50 | 30.255 | 19.890 | 39.851 | C |
| ATOM | 456 | O   | SER A | 50 | 31.298 | 19.699 | 39.256 | O |
| ATOM | 457 | CB  | SER A | 50 | 29.700 | 17.919 | 41.301 | C |
| ATOM | 458 | OG  | SER A | 50 | 28.562 | 17.704 | 40.477 | O |
| ATOM | 459 | H   | SER A | 50 | 32.188 | 19.280 | 41.624 | H |
| ATOM | 460 | HG  | SER A | 50 | 28.867 | 17.580 | 39.575 | H |
| ATOM | 461 | N   | THR A | 51 | 29.258 | 20.514 | 39.283 | N |
| ATOM | 462 | CA  | THR A | 51 | 29.393 | 21.003 | 37.881 | C |

|      |     |     |       |    |        |        |        |   |
|------|-----|-----|-------|----|--------|--------|--------|---|
| ATOM | 463 | C   | THR A | 51 | 28.745 | 20.015 | 36.911 | C |
| ATOM | 464 | O   | THR A | 51 | 27.604 | 19.629 | 37.069 | O |
| ATOM | 465 | CB  | THR A | 51 | 28.652 | 22.338 | 37.845 | C |
| ATOM | 466 | OG1 | THR A | 51 | 28.518 | 22.842 | 39.166 | O |
| ATOM | 467 | CG2 | THR A | 51 | 29.431 | 23.337 | 36.989 | C |
| ATOM | 468 | H   | THR A | 51 | 28.420 | 20.658 | 39.777 | H |
| ATOM | 469 | HG1 | THR A | 51 | 27.881 | 23.560 | 39.147 | H |
| ATOM | 470 | N   | SER A | 52 | 29.463 | 19.607 | 35.904 | N |
| ATOM | 471 | CA  | SER A | 52 | 28.894 | 18.645 | 34.915 | C |
| ATOM | 472 | C   | SER A | 52 | 29.353 | 19.009 | 33.500 | C |
| ATOM | 473 | O   | SER A | 52 | 30.527 | 19.208 | 33.252 | O |
| ATOM | 474 | CB  | SER A | 52 | 29.448 | 17.280 | 35.324 | C |
| ATOM | 475 | OG  | SER A | 52 | 30.563 | 16.963 | 34.501 | O |
| ATOM | 476 | H   | SER A | 52 | 30.379 | 19.932 | 35.799 | H |
| ATOM | 477 | HG  | SER A | 52 | 30.731 | 16.021 | 34.579 | H |
| ATOM | 478 | N   | THR A | 53 | 28.442 | 19.091 | 32.570 | N |
| ATOM | 479 | CA  | THR A | 53 | 28.836 | 19.437 | 31.171 | C |
| ATOM | 480 | C   | THR A | 53 | 28.763 | 18.192 | 30.287 | C |
| ATOM | 481 | O   | THR A | 53 | 27.695 | 17.736 | 29.928 | O |
| ATOM | 482 | CB  | THR A | 53 | 27.814 | 20.480 | 30.716 | C |
| ATOM | 483 | OG1 | THR A | 53 | 27.401 | 21.255 | 31.833 | O |
| ATOM | 484 | CG2 | THR A | 53 | 28.446 | 21.392 | 29.664 | C |
| ATOM | 485 | H   | THR A | 53 | 27.499 | 18.924 | 32.786 | H |
| ATOM | 486 | HG1 | THR A | 53 | 26.723 | 21.866 | 31.535 | H |
| ATOM | 487 | N   | GLY A | 54 | 29.888 | 17.630 | 29.939 | N |
| ATOM | 488 | CA  | GLY A | 54 | 29.870 | 16.408 | 29.085 | C |
| ATOM | 489 | C   | GLY A | 54 | 28.924 | 15.383 | 29.710 | C |
| ATOM | 490 | O   | GLY A | 54 | 27.739 | 15.376 | 29.440 | O |
| ATOM | 491 | H   | GLY A | 54 | 30.741 | 18.005 | 30.243 | H |
| ATOM | 492 | N   | SER A | 55 | 29.432 | 14.526 | 30.551 | N |
| ATOM | 493 | CA  | SER A | 55 | 28.550 | 13.513 | 31.199 | C |
| ATOM | 494 | C   | SER A | 55 | 29.361 | 12.284 | 31.615 | C |
| ATOM | 495 | O   | SER A | 55 | 30.270 | 12.369 | 32.417 | O |
| ATOM | 496 | CB  | SER A | 55 | 27.985 | 14.219 | 32.431 | C |
| ATOM | 497 | OG  | SER A | 55 | 29.035 | 14.900 | 33.105 | O |
| ATOM | 498 | H   | SER A | 55 | 30.387 | 14.552 | 30.761 | H |

|      |     |     |       |    |        |        |        |   |
|------|-----|-----|-------|----|--------|--------|--------|---|
| ATOM | 499 | HG  | SER A | 55 | 28.701 | 15.755 | 33.389 | H |
| ATOM | 500 | N   | ARG A | 56 | 29.033 | 11.138 | 31.082 | N |
| ATOM | 501 | CA  | ARG A | 56 | 29.776 | 9.903  | 31.453 | C |
| ATOM | 502 | C   | ARG A | 56 | 29.394 | 9.477  | 32.874 | C |
| ATOM | 503 | O   | ARG A | 56 | 28.344 | 8.909  | 33.099 | O |
| ATOM | 504 | CB  | ARG A | 56 | 29.323 | 8.852  | 30.437 | C |
| ATOM | 505 | CG  | ARG A | 56 | 30.457 | 7.854  | 30.194 | C |
| ATOM | 506 | CD  | ARG A | 56 | 29.956 | 6.437  | 30.480 | C |
| ATOM | 507 | NE  | ARG A | 56 | 29.416 | 5.946  | 29.182 | N |
| ATOM | 508 | CZ  | ARG A | 56 | 28.931 | 4.737  | 29.093 | C |
| ATOM | 509 | NH1 | ARG A | 56 | 27.817 | 4.434  | 29.700 | N |
| ATOM | 510 | NH2 | ARG A | 56 | 29.561 | 3.832  | 28.395 | N |
| ATOM | 511 | H   | ARG A | 56 | 28.292 | 11.091 | 30.442 | H |
| ATOM | 512 | HE  | ARG A | 56 | 29.423 | 6.531  | 28.396 | H |
| ATOM | 513 | HH1 | ARG A | 56 | 27.333 | 5.127  | 30.235 | H |
| ATOM | 514 | HH1 | ARG A | 56 | 27.446 | 3.507  | 29.632 | H |
| ATOM | 515 | HH2 | ARG A | 56 | 30.415 | 4.065  | 27.928 | H |
| ATOM | 516 | HH2 | ARG A | 56 | 29.190 | 2.906  | 28.326 | H |
| ATOM | 517 | N   | ILE A | 57 | 30.232 | 9.752  | 33.835 | N |
| ATOM | 518 | CA  | ILE A | 57 | 29.903 | 9.368  | 35.238 | C |
| ATOM | 519 | C   | ILE A | 57 | 30.296 | 7.911  | 35.496 | C |
| ATOM | 520 | O   | ILE A | 57 | 30.325 | 7.455  | 36.622 | O |
| ATOM | 521 | CB  | ILE A | 57 | 30.729 | 10.315 | 36.111 | C |
| ATOM | 522 | CG1 | ILE A | 57 | 30.608 | 11.745 | 35.570 | C |
| ATOM | 523 | CG2 | ILE A | 57 | 30.208 | 10.270 | 37.548 | C |
| ATOM | 524 | CD1 | ILE A | 57 | 29.144 | 12.053 | 35.241 | C |
| ATOM | 525 | H   | ILE A | 57 | 31.073 | 10.215 | 33.639 | H |
| ATOM | 526 | N   | SER A | 58 | 30.596 | 7.177  | 34.460 | N |
| ATOM | 527 | CA  | SER A | 58 | 30.985 | 5.749  | 34.641 | C |
| ATOM | 528 | C   | SER A | 58 | 30.070 | 5.072  | 35.668 | C |
| ATOM | 529 | O   | SER A | 58 | 28.938 | 5.468  | 35.860 | O |
| ATOM | 530 | CB  | SER A | 58 | 30.791 | 5.115  | 33.267 | C |
| ATOM | 531 | OG  | SER A | 58 | 32.038 | 5.069  | 32.590 | O |
| ATOM | 532 | H   | SER A | 58 | 30.563 | 7.565  | 33.558 | H |
| ATOM | 533 | HG  | SER A | 58 | 32.277 | 5.966  | 32.345 | H |
| ATOM | 534 | N   | GLY A | 59 | 30.552 | 4.051  | 36.326 | N |

|      |     |     |       |    |        |        |        |   |
|------|-----|-----|-------|----|--------|--------|--------|---|
| ATOM | 535 | CA  | GLY A | 59 | 29.705 | 3.352  | 37.332 | C |
| ATOM | 536 | C   | GLY A | 59 | 30.593 | 2.569  | 38.298 | C |
| ATOM | 537 | O   | GLY A | 59 | 31.693 | 2.976  | 38.596 | O |
| ATOM | 538 | H   | GLY A | 59 | 31.469 | 3.745  | 36.158 | H |
| ATOM | 539 | N   | PRO A | 60 | 30.075 | 1.466  | 38.761 | N |
| ATOM | 540 | CA  | PRO A | 60 | 30.826 | 0.620  | 39.716 | C |
| ATOM | 541 | C   | PRO A | 60 | 30.784 | 1.252  | 41.111 | C |
| ATOM | 542 | O   | PRO A | 60 | 30.374 | 0.633  | 42.073 | O |
| ATOM | 543 | CB  | PRO A | 60 | 30.069 | -0.704 | 39.693 | C |
| ATOM | 544 | CG  | PRO A | 60 | 28.677 | -0.354 | 39.263 | C |
| ATOM | 545 | CD  | PRO A | 60 | 28.760 | 0.907  | 38.438 | C |
| ATOM | 546 | N   | GLY A | 61 | 31.202 | 2.484  | 41.222 | N |
| ATOM | 547 | CA  | GLY A | 61 | 31.184 | 3.166  | 42.549 | C |
| ATOM | 548 | C   | GLY A | 61 | 30.365 | 4.459  | 42.450 | C |
| ATOM | 549 | O   | GLY A | 61 | 29.880 | 4.974  | 43.437 | O |
| ATOM | 550 | H   | GLY A | 61 | 31.527 | 2.962  | 40.431 | H |
| ATOM | 551 | N   | CYS A | 62 | 30.205 | 4.982  | 41.264 | N |
| ATOM | 552 | CA  | CYS A | 62 | 29.415 | 6.236  | 41.092 | C |
| ATOM | 553 | C   | CYS A | 62 | 29.829 | 7.295  | 42.122 | C |
| ATOM | 554 | O   | CYS A | 62 | 30.978 | 7.681  | 42.203 | O |
| ATOM | 555 | CB  | CYS A | 62 | 29.757 | 6.714  | 39.684 | C |
| ATOM | 556 | SG  | CYS A | 62 | 28.234 | 7.065  | 38.777 | S |
| ATOM | 557 | H   | CYS A | 62 | 30.600 | 4.546  | 40.480 | H |
| ATOM | 558 | N   | LYS A | 63 | 28.895 | 7.778  | 42.898 | N |
| ATOM | 559 | CA  | LYS A | 63 | 29.229 | 8.826  | 43.910 | C |
| ATOM | 560 | C   | LYS A | 63 | 28.564 | 10.147 | 43.520 | C |
| ATOM | 561 | O   | LYS A | 63 | 27.477 | 10.163 | 42.981 | O |
| ATOM | 562 | CB  | LYS A | 63 | 28.651 | 8.328  | 45.238 | C |
| ATOM | 563 | CG  | LYS A | 63 | 28.838 | 6.817  | 45.359 | C |
| ATOM | 564 | CD  | LYS A | 63 | 30.330 | 6.495  | 45.457 | C |
| ATOM | 565 | CE  | LYS A | 63 | 30.928 | 7.227  | 46.663 | C |
| ATOM | 566 | NZ  | LYS A | 63 | 31.661 | 6.178  | 47.427 | N |
| ATOM | 567 | H   | LYS A | 63 | 27.972 | 7.462  | 42.809 | H |
| ATOM | 568 | HZ1 | LYS A | 63 | 32.536 | 6.581  | 47.818 | H |
| ATOM | 569 | HZ2 | LYS A | 63 | 31.059 | 5.834  | 48.204 | H |
| ATOM | 570 | HZ3 | LYS A | 63 | 31.898 | 5.388  | 46.795 | H |



|      |     |     |       |    |        |        |        |   |
|------|-----|-----|-------|----|--------|--------|--------|---|
| ATOM | 571 | N   | ILE A | 64 | 29.195 | 11.253 | 43.790 | N |
| ATOM | 572 | CA  | ILE A | 64 | 28.575 | 12.559 | 43.433 | C |
| ATOM | 573 | C   | ILE A | 64 | 29.118 | 13.670 | 44.336 | C |
| ATOM | 574 | O   | ILE A | 64 | 30.311 | 13.860 | 44.461 | O |
| ATOM | 575 | CB  | ILE A | 64 | 28.965 | 12.795 | 41.975 | C |
| ATOM | 576 | CG1 | ILE A | 64 | 28.384 | 11.670 | 41.114 | C |
| ATOM | 577 | CG2 | ILE A | 64 | 28.406 | 14.139 | 41.507 | C |
| ATOM | 578 | CD1 | ILE A | 64 | 28.479 | 12.050 | 39.637 | C |
| ATOM | 579 | H   | ILE A | 64 | 30.071 | 11.227 | 44.226 | H |
| ATOM | 580 | N   | SER A | 65 | 28.251 | 14.408 | 44.966 | N |
| ATOM | 581 | CA  | SER A | 65 | 28.720 | 15.506 | 45.857 | C |
| ATOM | 582 | C   | SER A | 65 | 27.875 | 16.759 | 45.624 | C |
| ATOM | 583 | O   | SER A | 65 | 26.752 | 16.858 | 46.074 | O |
| ATOM | 584 | CB  | SER A | 65 | 28.537 | 14.983 | 47.280 | C |
| ATOM | 585 | OG  | SER A | 65 | 27.869 | 15.962 | 48.063 | O |
| ATOM | 586 | H   | SER A | 65 | 27.292 | 14.242 | 44.852 | H |
| ATOM | 587 | HG  | SER A | 65 | 28.184 | 15.887 | 48.966 | H |
| ATOM | 588 | N   | THR A | 66 | 28.412 | 17.711 | 44.916 | N |
| ATOM | 589 | CA  | THR A | 66 | 27.648 | 18.957 | 44.638 | C |
| ATOM | 590 | C   | THR A | 66 | 26.472 | 18.665 | 43.707 | C |
| ATOM | 591 | O   | THR A | 66 | 25.341 | 18.540 | 44.135 | O |
| ATOM | 592 | CB  | THR A | 66 | 27.148 | 19.444 | 45.995 | C |
| ATOM | 593 | OG1 | THR A | 66 | 28.089 | 19.094 | 47.000 | O |
| ATOM | 594 | CG2 | THR A | 66 | 26.987 | 20.964 | 45.946 | C |
| ATOM | 595 | H   | THR A | 66 | 29.318 | 17.603 | 44.559 | H |
| ATOM | 596 | HG1 | THR A | 66 | 27.622 | 18.613 | 47.688 | H |
| ATOM | 597 | N   | CYS A | 67 | 26.729 | 18.564 | 42.435 | N |
| ATOM | 598 | CA  | CYS A | 67 | 25.631 | 18.288 | 41.465 | C |
| ATOM | 599 | C   | CYS A | 67 | 25.828 | 19.142 | 40.216 | C |
| ATOM | 600 | O   | CYS A | 67 | 26.829 | 19.041 | 39.536 | O |
| ATOM | 601 | CB  | CYS A | 67 | 25.756 | 16.805 | 41.110 | C |
| ATOM | 602 | SG  | CYS A | 67 | 24.116 | 16.132 | 40.738 | S |
| ATOM | 603 | H   | CYS A | 67 | 27.649 | 18.678 | 42.114 | H |
| ATOM | 604 | N   | ILE A | 68 | 24.880 | 19.975 | 39.897 | N |
| ATOM | 605 | CA  | ILE A | 68 | 25.024 | 20.814 | 38.680 | C |
| ATOM | 606 | C   | ILE A | 68 | 24.464 | 20.044 | 37.492 | C |

|      |     |     |       |    |        |        |        |   |
|------|-----|-----|-------|----|--------|--------|--------|---|
| ATOM | 607 | O   | ILE A | 68 | 23.347 | 20.250 | 37.063 | O |
| ATOM | 608 | CB  | ILE A | 68 | 24.213 | 22.083 | 38.936 | C |
| ATOM | 609 | CG1 | ILE A | 68 | 24.817 | 22.860 | 40.112 | C |
| ATOM | 610 | CG2 | ILE A | 68 | 24.264 | 22.952 | 37.683 | C |
| ATOM | 611 | CD1 | ILE A | 68 | 24.575 | 22.097 | 41.415 | C |
| ATOM | 612 | H   | ILE A | 68 | 24.074 | 20.035 | 40.447 | H |
| ATOM | 613 | N   | ILE A | 69 | 25.238 | 19.137 | 36.984 | N |
| ATOM | 614 | CA  | ILE A | 69 | 24.779 | 18.307 | 35.841 | C |
| ATOM | 615 | C   | ILE A | 69 | 25.137 | 18.988 | 34.516 | C |
| ATOM | 616 | O   | ILE A | 69 | 26.081 | 19.746 | 34.432 | O |
| ATOM | 617 | CB  | ILE A | 69 | 25.530 | 16.981 | 36.002 | C |
| ATOM | 618 | CG1 | ILE A | 69 | 25.477 | 16.527 | 37.472 | C |
| ATOM | 619 | CG2 | ILE A | 69 | 24.880 | 15.915 | 35.116 | C |
| ATOM | 620 | CD1 | ILE A | 69 | 26.574 | 15.495 | 37.728 | C |
| ATOM | 621 | H   | ILE A | 69 | 26.126 | 18.992 | 37.370 | H |
| ATOM | 622 | N   | THR A | 70 | 24.383 | 18.727 | 33.482 | N |
| ATOM | 623 | CA  | THR A | 70 | 24.675 | 19.369 | 32.165 | C |
| ATOM | 624 | C   | THR A | 70 | 24.226 | 18.460 | 31.017 | C |
| ATOM | 625 | O   | THR A | 70 | 23.060 | 18.401 | 30.680 | O |
| ATOM | 626 | CB  | THR A | 70 | 23.855 | 20.659 | 32.171 | C |
| ATOM | 627 | OG1 | THR A | 70 | 24.473 | 21.607 | 33.035 | O |
| ATOM | 628 | CG2 | THR A | 70 | 23.780 | 21.223 | 30.750 | C |
| ATOM | 629 | H   | THR A | 70 | 23.622 | 18.117 | 33.572 | H |
| ATOM | 630 | HG1 | THR A | 70 | 24.541 | 22.443 | 32.566 | H |
| ATOM | 631 | N   | GLY A | 71 | 25.143 | 17.758 | 30.410 | N |
| ATOM | 632 | CA  | GLY A | 71 | 24.763 | 16.863 | 29.280 | C |
| ATOM | 633 | C   | GLY A | 71 | 24.391 | 15.484 | 29.824 | C |
| ATOM | 634 | O   | GLY A | 71 | 23.535 | 14.806 | 29.289 | O |
| ATOM | 635 | H   | GLY A | 71 | 26.079 | 17.822 | 30.691 | H |
| ATOM | 636 | N   | GLY A | 72 | 25.024 | 15.063 | 30.881 | N |
| ATOM | 637 | CA  | GLY A | 72 | 24.700 | 13.727 | 31.455 | C |
| ATOM | 638 | C   | GLY A | 72 | 23.400 | 13.825 | 32.257 | C |
| ATOM | 639 | O   | GLY A | 72 | 22.780 | 12.832 | 32.577 | O |
| ATOM | 640 | H   | GLY A | 72 | 25.709 | 15.625 | 31.299 | H |
| ATOM | 641 | N   | VAL A | 73 | 22.979 | 15.021 | 32.574 | N |
| ATOM | 642 | CA  | VAL A | 73 | 21.713 | 15.186 | 33.345 | C |

|      |     |     |       |    |        |        |        |   |
|------|-----|-----|-------|----|--------|--------|--------|---|
| ATOM | 643 | C   | VAL A | 73 | 21.951 | 16.026 | 34.605 | C |
| ATOM | 644 | O   | VAL A | 73 | 22.515 | 17.099 | 34.534 | O |
| ATOM | 645 | CB  | VAL A | 73 | 20.777 | 15.929 | 32.395 | C |
| ATOM | 646 | CG1 | VAL A | 73 | 20.754 | 15.227 | 31.037 | C |
| ATOM | 647 | CG2 | VAL A | 73 | 21.279 | 17.364 | 32.219 | C |
| ATOM | 648 | H   | VAL A | 73 | 23.491 | 15.810 | 32.297 | H |
| ATOM | 649 | N   | PRO A | 74 | 21.497 | 15.516 | 35.720 | N |
| ATOM | 650 | CA  | PRO A | 74 | 21.650 | 16.239 | 37.005 | C |
| ATOM | 651 | C   | PRO A | 74 | 20.643 | 17.387 | 37.088 | C |
| ATOM | 652 | O   | PRO A | 74 | 19.526 | 17.280 | 36.622 | O |
| ATOM | 653 | CB  | PRO A | 74 | 21.335 | 15.181 | 38.055 | C |
| ATOM | 654 | CG  | PRO A | 74 | 20.466 | 14.183 | 37.356 | C |
| ATOM | 655 | CD  | PRO A | 74 | 20.811 | 14.231 | 35.887 | C |
| ATOM | 656 | N   | ALAA  | 75 | 21.022 | 18.481 | 37.688 | N |
| ATOM | 657 | CA  | ALAA  | 75 | 20.077 | 19.626 | 37.809 | C |
| ATOM | 658 | C   | ALAA  | 75 | 19.291 | 19.510 | 39.116 | C |
| ATOM | 659 | O   | ALAA  | 75 | 19.689 | 18.798 | 40.016 | O |
| ATOM | 660 | CB  | ALAA  | 75 | 20.962 | 20.873 | 37.820 | C |
| ATOM | 661 | H   | ALAA  | 75 | 21.925 | 18.546 | 38.065 | H |
| ATOM | 662 | N   | PRO A | 76 | 18.199 | 20.217 | 39.179 | N |
| ATOM | 663 | CA  | PRO A | 76 | 17.348 | 20.194 | 40.394 | C |
| ATOM | 664 | C   | PRO A | 76 | 18.070 | 20.884 | 41.554 | C |
| ATOM | 665 | O   | PRO A | 76 | 17.657 | 21.923 | 42.028 | O |
| ATOM | 666 | CB  | PRO A | 76 | 16.101 | 20.970 | 39.976 | C |
| ATOM | 667 | CG  | PRO A | 76 | 16.557 | 21.848 | 38.855 | C |
| ATOM | 668 | CD  | PRO A | 76 | 17.654 | 21.101 | 38.143 | C |
| ATOM | 669 | N   | SER A | 77 | 19.149 | 20.310 | 42.011 | N |
| ATOM | 670 | CA  | SER A | 77 | 19.905 | 20.928 | 43.137 | C |
| ATOM | 671 | C   | SER A | 77 | 19.717 | 20.110 | 44.417 | C |
| ATOM | 672 | O   | SER A | 77 | 19.961 | 18.920 | 44.447 | O |
| ATOM | 673 | CB  | SER A | 77 | 21.367 | 20.896 | 42.691 | C |
| ATOM | 674 | OG  | SER A | 77 | 21.972 | 22.151 | 42.971 | O |
| ATOM | 675 | H   | SER A | 77 | 19.465 | 19.472 | 41.610 | H |
| ATOM | 676 | HG  | SER A | 77 | 21.721 | 22.409 | 43.862 | H |
| ATOM | 677 | N   | ALAA  | 78 | 19.289 | 20.741 | 45.476 | N |
| ATOM | 678 | CA  | ALAA  | 78 | 19.087 | 20.003 | 46.755 | C |

|      |     |     |       |    |        |        |        |   |
|------|-----|-----|-------|----|--------|--------|--------|---|
| ATOM | 679 | C   | ALA A | 78 | 20.438 | 19.631 | 47.373 | C |
| ATOM | 680 | O   | ALA A | 78 | 20.505 | 19.001 | 48.409 | O |
| ATOM | 681 | CB  | ALA A | 78 | 18.334 | 20.979 | 47.660 | C |
| ATOM | 682 | H   | ALA A | 78 | 19.100 | 21.702 | 45.429 | H |
| ATOM | 683 | N   | ALA A | 79 | 21.519 | 20.024 | 46.751 | N |
| ATOM | 684 | CA  | ALA A | 79 | 22.861 | 19.694 | 47.312 | C |
| ATOM | 685 | C   | ALA A | 79 | 23.402 | 18.406 | 46.686 | C |
| ATOM | 686 | O   | ALA A | 79 | 24.225 | 17.724 | 47.262 | O |
| ATOM | 687 | CB  | ALA A | 79 | 23.746 | 20.883 | 46.939 | C |
| ATOM | 688 | H   | ALA A | 79 | 21.448 | 20.536 | 45.919 | H |
| ATOM | 689 | N   | CYS A | 80 | 22.942 | 18.061 | 45.514 | N |
| ATOM | 690 | CA  | CYS A | 80 | 23.431 | 16.810 | 44.867 | C |
| ATOM | 691 | C   | CYS A | 80 | 22.835 | 15.594 | 45.587 | C |
| ATOM | 692 | O   | CYS A | 80 | 21.937 | 15.725 | 46.395 | O |
| ATOM | 693 | CB  | CYS A | 80 | 22.946 | 16.897 | 43.418 | C |
| ATOM | 694 | SG  | CYS A | 80 | 23.458 | 15.418 | 42.510 | S |
| ATOM | 695 | H   | CYS A | 80 | 22.274 | 18.619 | 45.063 | H |
| ATOM | 696 | N   | LYS A | 81 | 23.339 | 14.417 | 45.327 | N |
| ATOM | 697 | CA  | LYS A | 81 | 22.804 | 13.214 | 46.035 | C |
| ATOM | 698 | C   | LYS A | 81 | 21.983 | 12.319 | 45.095 | C |
| ATOM | 699 | O   | LYS A | 81 | 20.957 | 11.792 | 45.475 | O |
| ATOM | 700 | CB  | LYS A | 81 | 24.056 | 12.491 | 46.585 | C |
| ATOM | 701 | CG  | LYS A | 81 | 24.462 | 11.287 | 45.710 | C |
| ATOM | 702 | CD  | LYS A | 81 | 25.274 | 11.766 | 44.502 | C |
| ATOM | 703 | CE  | LYS A | 81 | 25.017 | 10.839 | 43.305 | C |
| ATOM | 704 | NZ  | LYS A | 81 | 25.328 | 9.470  | 43.807 | N |
| ATOM | 705 | H   | LYS A | 81 | 24.078 | 14.327 | 44.689 | H |
| ATOM | 706 | HZ1 | LYS A | 81 | 26.319 | 9.431  | 44.114 | H |
| ATOM | 707 | HZ2 | LYS A | 81 | 24.706 | 9.246  | 44.612 | H |
| ATOM | 708 | HZ3 | LYS A | 81 | 25.176 | 8.778  | 43.046 | H |
| ATOM | 709 | N   | ILE A | 82 | 22.430 | 12.121 | 43.886 | N |
| ATOM | 710 | CA  | ILE A | 82 | 21.670 | 11.237 | 42.956 | C |
| ATOM | 711 | C   | ILE A | 82 | 21.289 | 9.937  | 43.675 | C |
| ATOM | 712 | O   | ILE A | 82 | 20.151 | 9.739  | 44.049 | O |
| ATOM | 713 | CB  | ILE A | 82 | 20.414 | 12.028 | 42.587 | C |
| ATOM | 714 | CG1 | ILE A | 82 | 20.815 | 13.405 | 42.053 | C |

|      |     |     |       |    |        |        |        |   |
|------|-----|-----|-------|----|--------|--------|--------|---|
| ATOM | 715 | CG2 | ILE A | 82 | 19.636 | 11.271 | 41.509 | C |
| ATOM | 716 | CD1 | ILE A | 82 | 21.837 | 13.240 | 40.929 | C |
| ATOM | 717 | H   | ILE A | 82 | 23.265 | 12.538 | 43.596 | H |
| ATOM | 718 | N   | SER A | 83 | 22.232 | 9.053  | 43.883 | N |
| ATOM | 719 | CA  | SER A | 83 | 21.904 | 7.781  | 44.592 | C |
| ATOM | 720 | C   | SER A | 83 | 22.375 | 6.567  | 43.783 | C |
| ATOM | 721 | O   | SER A | 83 | 21.601 | 5.928  | 43.098 | O |
| ATOM | 722 | CB  | SER A | 83 | 22.661 | 7.860  | 45.917 | C |
| ATOM | 723 | OG  | SER A | 83 | 21.732 | 8.023  | 46.981 | O |
| ATOM | 724 | H   | SER A | 83 | 23.151 | 9.226  | 43.584 | H |
| ATOM | 725 | HG  | SER A | 83 | 21.848 | 7.290  | 47.590 | H |
| ATOM | 726 | N   | GLY A | 84 | 23.635 | 6.236  | 43.869 | N |
| ATOM | 727 | CA  | GLY A | 84 | 24.145 | 5.054  | 43.116 | C |
| ATOM | 728 | C   | GLY A | 84 | 25.020 | 5.513  | 41.948 | C |
| ATOM | 729 | O   | GLY A | 84 | 26.020 | 4.896  | 41.632 | O |
| ATOM | 730 | H   | GLY A | 84 | 24.242 | 6.757  | 44.434 | H |
| ATOM | 731 | N   | CYS A | 85 | 24.656 | 6.584  | 41.297 | N |
| ATOM | 732 | CA  | CYS A | 85 | 25.476 | 7.062  | 40.147 | C |
| ATOM | 733 | C   | CYS A | 85 | 24.569 | 7.361  | 38.947 | C |
| ATOM | 734 | O   | CYS A | 85 | 23.364 | 7.218  | 39.021 | O |
| ATOM | 735 | CB  | CYS A | 85 | 26.164 | 8.336  | 40.653 | C |
| ATOM | 736 | SG  | CYS A | 85 | 27.558 | 8.797  | 39.578 | S |
| ATOM | 737 | H   | CYS A | 85 | 23.846 | 7.067  | 41.559 | H |
| ATOM | 738 | N   | THR A | 86 | 25.135 | 7.765  | 37.845 | N |
| ATOM | 739 | CA  | THR A | 86 | 24.311 | 8.065  | 36.642 | C |
| ATOM | 740 | C   | THR A | 86 | 25.196 | 8.659  | 35.549 | C |
| ATOM | 741 | O   | THR A | 86 | 26.387 | 8.428  | 35.509 | O |
| ATOM | 742 | CB  | THR A | 86 | 23.757 | 6.716  | 36.196 | C |
| ATOM | 743 | OG1 | THR A | 86 | 23.213 | 6.839  | 34.890 | O |
| ATOM | 744 | CG2 | THR A | 86 | 24.882 | 5.677  | 36.188 | C |
| ATOM | 745 | H   | THR A | 86 | 26.104 | 7.866  | 37.802 | H |
| ATOM | 746 | HG1 | THR A | 86 | 22.257 | 6.874  | 34.968 | H |
| ATOM | 747 | N   | PHE A | 87 | 24.624 | 9.420  | 34.661 | N |
| ATOM | 748 | CA  | PHE A | 87 | 25.448 | 10.020 | 33.570 | C |
| ATOM | 749 | C   | PHE A | 87 | 24.850 | 9.665  | 32.211 | C |
| ATOM | 750 | O   | PHE A | 87 | 23.682 | 9.345  | 32.098 | O |

|        |     |     |       |    |        |        |        |   |
|--------|-----|-----|-------|----|--------|--------|--------|---|
| ATOM   | 751 | CB  | PHE A | 87 | 25.417 | 11.547 | 33.771 | C |
| ATOM   | 752 | CG  | PHE A | 87 | 25.038 | 11.915 | 35.191 | C |
| ATOM   | 753 | CD1 | PHE A | 87 | 25.684 | 11.312 | 36.279 | C |
| ATOM   | 754 | CD2 | PHE A | 87 | 24.040 | 12.869 | 35.409 | C |
| ATOM   | 755 | CE1 | PHE A | 87 | 25.327 | 11.667 | 37.589 | C |
| ATOM   | 756 | CE2 | PHE A | 87 | 23.685 | 13.221 | 36.714 | C |
| ATOM   | 757 | CZ  | PHE A | 87 | 24.326 | 12.622 | 37.803 | C |
| ATOM   | 758 | H   | PHE A | 87 | 23.661 | 9.593  | 34.707 | H |
| ATOM   | 759 | N   | SER A | 88 | 25.639 | 9.722  | 31.177 | N |
| ATOM   | 760 | CA  | SER A | 88 | 25.120 | 9.393  | 29.820 | C |
| ATOM   | 761 | C   | SER A | 88 | 25.731 | 10.342 | 28.790 | C |
| ATOM   | 762 | O   | SER A | 88 | 25.802 | 10.039 | 27.616 | O |
| ATOM   | 763 | CB  | SER A | 88 | 25.567 | 7.955  | 29.559 | C |
| ATOM   | 764 | OG  | SER A | 88 | 25.004 | 7.505  | 28.335 | O |
| ATOM   | 765 | H   | SER A | 88 | 26.576 | 9.985  | 31.291 | H |
| ATOM   | 766 | HG  | SER A | 88 | 25.641 | 7.670  | 27.636 | H |
| ATOM   | 767 | N   | ALA A | 89 | 26.178 | 11.489 | 29.224 | N |
| ATOM   | 768 | CA  | ALA A | 89 | 26.790 | 12.457 | 28.271 | C |
| ATOM   | 769 | C   | ALA A | 89 | 27.943 | 11.787 | 27.520 | C |
| ATOM   | 770 | O   | ALA A | 89 | 27.795 | 11.344 | 26.398 | O |
| ATOM   | 771 | CB  | ALA A | 89 | 25.661 | 12.830 | 27.311 | C |
| ATOM   | 772 | H   | ALA A | 89 | 26.114 | 11.713 | 30.175 | H |
| ATOM   | 773 | N   | ASN A | 90 | 29.090 | 11.700 | 28.138 | N |
| ATOM   | 774 | CA  | ASN A | 90 | 30.253 | 11.051 | 27.470 | C |
| ATOM   | 775 | C   | ASN A | 90 | 30.725 | 11.895 | 26.279 | C |
| ATOM   | 776 | O   | ASN A | 90 | 31.781 | 11.596 | 25.747 | O |
| ATOM   | 777 | CB  | ASN A | 90 | 31.333 | 10.972 | 28.558 | C |
| ATOM   | 778 | CG  | ASN A | 90 | 32.090 | 12.298 | 28.650 | C |
| ATOM   | 779 | OD1 | ASN A | 90 | 33.301 | 12.315 | 28.743 | O |
| ATOM   | 780 | ND2 | ASN A | 90 | 31.422 | 13.421 | 28.629 | N |
| ATOM   | 781 | OXT | ASN A | 90 | 30.021 | 12.825 | 25.922 | O |
| ATOM   | 782 | H   | ASN A | 90 | 29.184 | 12.059 | 29.046 | H |
| ATOM   | 783 | HD2 | ASN A | 90 | 30.445 | 13.406 | 28.554 | H |
| ATOM   | 784 | HD2 | ASN A | 90 | 31.898 | 14.276 | 28.687 | H |
| TER    | 785 |     | ASP A | 1  |        |        |        |   |
| ENDMOL |     |     |       |    |        |        |        |   |

sbwAFP with binding conformation B

|      |    |     |       |   |        |        |        |   |
|------|----|-----|-------|---|--------|--------|--------|---|
| ATOM | 1  | N   | ASP A | 1 | 18.522 | 67.683 | 28.339 | N |
| ATOM | 2  | CA  | ASP A | 1 | 17.788 | 67.354 | 29.595 | C |
| ATOM | 3  | C   | ASP A | 1 | 16.748 | 66.262 | 29.329 | C |
| ATOM | 4  | O   | ASP A | 1 | 15.558 | 66.512 | 29.326 | O |
| ATOM | 5  | CB  | ASP A | 1 | 18.860 | 66.849 | 30.560 | C |
| ATOM | 6  | CG  | ASP A | 1 | 19.311 | 67.994 | 31.467 | C |
| ATOM | 7  | OD1 | ASP A | 1 | 18.495 | 68.471 | 32.237 | O |
| ATOM | 8  | OD2 | ASP A | 1 | 20.467 | 68.374 | 31.379 | O |
| ATOM | 9  | H1  | ASP A | 1 | 17.854 | 68.056 | 27.635 | H |
| ATOM | 10 | H2  | ASP A | 1 | 19.249 | 68.399 | 28.541 | H |
| ATOM | 11 | H3  | ASP A | 1 | 18.973 | 66.824 | 27.966 | H |
| ATOM | 12 | N   | GLY A | 2 | 17.188 | 65.053 | 29.110 | N |
| ATOM | 13 | CA  | GLY A | 2 | 16.226 | 63.947 | 28.846 | C |
| ATOM | 14 | C   | GLY A | 2 | 15.964 | 63.175 | 30.140 | C |
| ATOM | 15 | O   | GLY A | 2 | 16.715 | 63.266 | 31.091 | O |
| ATOM | 16 | H   | GLY A | 2 | 18.151 | 64.874 | 29.119 | H |
| ATOM | 17 | N   | SER A | 3 | 14.904 | 62.416 | 30.184 | N |
| ATOM | 18 | CA  | SER A | 3 | 14.592 | 61.638 | 31.418 | C |
| ATOM | 19 | C   | SER A | 3 | 15.846 | 60.918 | 31.922 | C |
| ATOM | 20 | O   | SER A | 3 | 16.784 | 60.693 | 31.182 | O |
| ATOM | 21 | CB  | SER A | 3 | 14.128 | 62.679 | 32.436 | C |
| ATOM | 22 | OG  | SER A | 3 | 12.924 | 62.234 | 33.044 | O |
| ATOM | 23 | H   | SER A | 3 | 14.311 | 62.357 | 29.406 | H |
| ATOM | 24 | HG  | SER A | 3 | 12.949 | 61.276 | 33.086 | H |
| ATOM | 25 | N   | CYS A | 4 | 15.869 | 60.554 | 33.175 | N |
| ATOM | 26 | CA  | CYS A | 4 | 17.062 | 59.849 | 33.728 | C |
| ATOM | 27 | C   | CYS A | 4 | 17.221 | 58.479 | 33.060 | C |
| ATOM | 28 | O   | CYS A | 4 | 16.980 | 58.325 | 31.880 | O |
| ATOM | 29 | CB  | CYS A | 4 | 18.249 | 60.753 | 33.395 | C |
| ATOM | 30 | SG  | CYS A | 4 | 19.032 | 61.310 | 34.929 | S |
| ATOM | 31 | H   | CYS A | 4 | 15.103 | 60.746 | 33.755 | H |
| ATOM | 32 | N   | THR A | 5 | 17.637 | 57.491 | 33.806 | N |
| ATOM | 33 | CA  | THR A | 5 | 17.821 | 56.131 | 33.224 | C |
| ATOM | 34 | C   | THR A | 5 | 18.593 | 55.259 | 34.209 | C |

|      |    |     |       |   |        |        |        |   |
|------|----|-----|-------|---|--------|--------|--------|---|
| ATOM | 35 | O   | THR A | 5 | 18.019 | 54.521 | 34.983 | O |
| ATOM | 36 | CB  | THR A | 5 | 16.415 | 55.568 | 33.012 | C |
| ATOM | 37 | OG1 | THR A | 5 | 15.669 | 56.443 | 32.177 | O |
| ATOM | 38 | CG2 | THR A | 5 | 16.517 | 54.190 | 32.352 | C |
| ATOM | 39 | H   | THR A | 5 | 17.838 | 57.644 | 34.754 | H |
| ATOM | 40 | HG1 | THR A | 5 | 15.759 | 56.139 | 31.272 | H |
| ATOM | 41 | N   | ASN A | 6 | 19.890 | 55.349 | 34.188 | N |
| ATOM | 42 | CA  | ASN A | 6 | 20.715 | 54.537 | 35.124 | C |
| ATOM | 43 | C   | ASN A | 6 | 20.502 | 53.041 | 34.850 | C |
| ATOM | 44 | O   | ASN A | 6 | 21.356 | 52.366 | 34.313 | O |
| ATOM | 45 | CB  | ASN A | 6 | 22.148 | 54.971 | 34.818 | C |
| ATOM | 46 | CG  | ASN A | 6 | 22.419 | 54.832 | 33.318 | C |
| ATOM | 47 | OD1 | ASN A | 6 | 21.942 | 53.913 | 32.683 | O |
| ATOM | 48 | ND2 | ASN A | 6 | 23.170 | 55.719 | 32.720 | N |
| ATOM | 49 | H   | ASN A | 6 | 20.326 | 55.960 | 33.559 | H |
| ATOM | 50 | HD2 | ASN A | 6 | 23.552 | 56.461 | 33.232 | H |
| ATOM | 51 | HD2 | ASN A | 6 | 23.349 | 55.639 | 31.760 | H |
| ATOM | 52 | N   | THR A | 7 | 19.354 | 52.529 | 35.216 | N |
| ATOM | 53 | CA  | THR A | 7 | 19.047 | 51.084 | 34.985 | C |
| ATOM | 54 | C   | THR A | 7 | 18.846 | 50.814 | 33.491 | C |
| ATOM | 55 | O   | THR A | 7 | 18.629 | 49.692 | 33.082 | O |
| ATOM | 56 | CB  | THR A | 7 | 20.258 | 50.312 | 35.514 | C |
| ATOM | 57 | OG1 | THR A | 7 | 20.676 | 50.875 | 36.750 | O |
| ATOM | 58 | CG2 | THR A | 7 | 19.876 | 48.848 | 35.720 | C |
| ATOM | 59 | H   | THR A | 7 | 18.683 | 53.103 | 35.642 | H |
| ATOM | 60 | HG1 | THR A | 7 | 19.919 | 50.890 | 37.339 | H |
| ATOM | 61 | N   | ASN A | 8 | 18.912 | 51.837 | 32.681 | N |
| ATOM | 62 | CA  | ASN A | 8 | 18.725 | 51.655 | 31.211 | C |
| ATOM | 63 | C   | ASN A | 8 | 18.975 | 52.983 | 30.493 | C |
| ATOM | 64 | O   | ASN A | 8 | 18.388 | 53.269 | 29.470 | O |
| ATOM | 65 | CB  | ASN A | 8 | 19.779 | 50.630 | 30.793 | C |
| ATOM | 66 | CG  | ASN A | 8 | 19.743 | 50.453 | 29.277 | C |
| ATOM | 67 | OD1 | ASN A | 8 | 20.739 | 50.115 | 28.669 | O |
| ATOM | 68 | ND2 | ASN A | 8 | 18.628 | 50.669 | 28.636 | N |
| ATOM | 69 | H   | ASN A | 8 | 19.085 | 52.732 | 33.040 | H |
| ATOM | 70 | HD2 | ASN A | 8 | 17.826 | 50.940 | 29.129 | H |



|      |     |     |     |   |    |        |        |        |   |
|------|-----|-----|-----|---|----|--------|--------|--------|---|
| ATOM | 71  | HD2 | ASN | A | 8  | 18.592 | 50.558 | 27.664 | H |
| ATOM | 72  | N   | SER | A | 9  | 19.848 | 53.793 | 31.032 | N |
| ATOM | 73  | CA  | SER | A | 9  | 20.158 | 55.111 | 30.405 | C |
| ATOM | 74  | C   | SER | A | 9  | 21.007 | 54.933 | 29.148 | C |
| ATOM | 75  | O   | SER | A | 9  | 20.551 | 54.427 | 28.141 | O |
| ATOM | 76  | CB  | SER | A | 9  | 18.805 | 55.729 | 30.052 | C |
| ATOM | 77  | OG  | SER | A | 9  | 18.827 | 57.115 | 30.365 | O |
| ATOM | 78  | H   | SER | A | 9  | 20.304 | 53.530 | 31.859 | H |
| ATOM | 79  | HG  | SER | A | 9  | 18.332 | 57.582 | 29.687 | H |
| ATOM | 80  | N   | GLN | A | 10 | 22.239 | 55.360 | 29.199 | N |
| ATOM | 81  | CA  | GLN | A | 10 | 23.119 | 55.236 | 28.008 | C |
| ATOM | 82  | C   | GLN | A | 10 | 23.962 | 56.501 | 27.863 | C |
| ATOM | 83  | O   | GLN | A | 10 | 25.092 | 56.461 | 27.418 | O |
| ATOM | 84  | CB  | GLN | A | 10 | 24.008 | 54.026 | 28.286 | C |
| ATOM | 85  | CG  | GLN | A | 10 | 24.117 | 53.191 | 27.014 | C |
| ATOM | 86  | CD  | GLN | A | 10 | 24.972 | 51.952 | 27.284 | C |
| ATOM | 87  | OE1 | GLN | A | 10 | 26.025 | 51.787 | 26.698 | O |
| ATOM | 88  | NE2 | GLN | A | 10 | 24.563 | 51.068 | 28.151 | N |
| ATOM | 89  | H   | GLN | A | 10 | 22.581 | 55.774 | 30.020 | H |
| ATOM | 90  | HE2 | GLN | A | 10 | 23.715 | 51.200 | 28.623 | H |
| ATOM | 91  | HE2 | GLN | A | 10 | 25.103 | 50.271 | 28.332 | H |
| ATOM | 92  | N   | LEU | A | 11 | 23.418 | 57.623 | 28.237 | N |
| ATOM | 93  | CA  | LEU | A | 11 | 24.186 | 58.893 | 28.123 | C |
| ATOM | 94  | C   | LEU | A | 11 | 24.816 | 58.998 | 26.735 | C |
| ATOM | 95  | O   | LEU | A | 11 | 24.126 | 59.104 | 25.740 | O |
| ATOM | 96  | CB  | LEU | A | 11 | 23.157 | 60.007 | 28.328 | C |
| ATOM | 97  | CG  | LEU | A | 11 | 22.911 | 60.234 | 29.824 | C |
| ATOM | 98  | CD1 | LEU | A | 11 | 24.244 | 60.330 | 30.567 | C |
| ATOM | 99  | CD2 | LEU | A | 11 | 22.099 | 59.068 | 30.390 | C |
| ATOM | 100 | H   | LEU | A | 11 | 22.506 | 57.631 | 28.593 | H |
| ATOM | 101 | N   | SER | A | 12 | 26.120 | 58.958 | 26.671 | N |
| ATOM | 102 | CA  | SER | A | 12 | 26.830 | 59.048 | 25.357 | C |
| ATOM | 103 | C   | SER | A | 12 | 26.060 | 59.943 | 24.378 | C |
| ATOM | 104 | O   | SER | A | 12 | 25.539 | 59.477 | 23.382 | O |
| ATOM | 105 | CB  | SER | A | 12 | 28.186 | 59.667 | 25.687 | C |
| ATOM | 106 | OG  | SER | A | 12 | 28.014 | 61.047 | 25.980 | O |

|      |     |     |       |    |        |        |        |   |
|------|-----|-----|-------|----|--------|--------|--------|---|
| ATOM | 107 | H   | SER A | 12 | 26.640 | 58.860 | 27.498 | H |
| ATOM | 108 | HG  | SER A | 12 | 27.741 | 61.123 | 26.898 | H |
| ATOM | 109 | N   | ALA A | 13 | 25.979 | 61.218 | 24.648 | N |
| ATOM | 110 | CA  | ALA A | 13 | 25.237 | 62.125 | 23.724 | C |
| ATOM | 111 | C   | ALA A | 13 | 25.274 | 63.568 | 24.236 | C |
| ATOM | 112 | O   | ALA A | 13 | 24.343 | 64.326 | 24.045 | O |
| ATOM | 113 | CB  | ALA A | 13 | 25.968 | 62.011 | 22.387 | C |
| ATOM | 114 | H   | ALA A | 13 | 26.402 | 61.577 | 25.455 | H |
| ATOM | 115 | N   | ASN A | 14 | 26.340 | 63.958 | 24.880 | N |
| ATOM | 116 | CA  | ASN A | 14 | 26.427 | 65.355 | 25.395 | C |
| ATOM | 117 | C   | ASN A | 14 | 26.446 | 65.358 | 26.925 | C |
| ATOM | 118 | O   | ASN A | 14 | 26.783 | 66.345 | 27.550 | O |
| ATOM | 119 | CB  | ASN A | 14 | 27.743 | 65.900 | 24.841 | C |
| ATOM | 120 | CG  | ASN A | 14 | 28.856 | 64.874 | 25.060 | C |
| ATOM | 121 | OD1 | ASN A | 14 | 28.747 | 64.017 | 25.915 | O |
| ATOM | 122 | ND2 | ASN A | 14 | 29.930 | 64.928 | 24.322 | N |
| ATOM | 123 | H   | ASN A | 14 | 27.083 | 63.334 | 25.022 | H |
| ATOM | 124 | HD2 | ASN A | 14 | 30.018 | 65.619 | 23.633 | H |
| ATOM | 125 | HD2 | ASN A | 14 | 30.648 | 64.274 | 24.453 | H |
| ATOM | 126 | N   | SER A | 15 | 26.085 | 64.265 | 27.535 | N |
| ATOM | 127 | CA  | SER A | 15 | 26.082 | 64.208 | 29.025 | C |
| ATOM | 128 | C   | SER A | 15 | 24.987 | 65.117 | 29.588 | C |
| ATOM | 129 | O   | SER A | 15 | 24.361 | 65.872 | 28.870 | O |
| ATOM | 130 | CB  | SER A | 15 | 25.787 | 62.749 | 29.366 | C |
| ATOM | 131 | OG  | SER A | 15 | 25.423 | 62.658 | 30.736 | O |
| ATOM | 132 | H   | SER A | 15 | 25.815 | 63.479 | 27.013 | H |
| ATOM | 133 | HG  | SER A | 15 | 24.484 | 62.848 | 30.806 | H |
| ATOM | 134 | N   | LYS A | 16 | 24.749 | 65.044 | 30.869 | N |
| ATOM | 135 | CA  | LYS A | 16 | 23.692 | 65.896 | 31.482 | C |
| ATOM | 136 | C   | LYS A | 16 | 22.981 | 65.126 | 32.600 | C |
| ATOM | 137 | O   | LYS A | 16 | 23.594 | 64.379 | 33.336 | O |
| ATOM | 138 | CB  | LYS A | 16 | 24.434 | 67.106 | 32.054 | C |
| ATOM | 139 | CG  | LYS A | 16 | 23.682 | 68.386 | 31.686 | C |
| ATOM | 140 | CD  | LYS A | 16 | 23.484 | 69.241 | 32.940 | C |
| ATOM | 141 | CE  | LYS A | 16 | 22.727 | 70.519 | 32.571 | C |
| ATOM | 142 | NZ  | LYS A | 16 | 23.688 | 71.313 | 31.758 | N |

|      |     |     |       |    |        |        |        |   |
|------|-----|-----|-------|----|--------|--------|--------|---|
| ATOM | 143 | H   | LYS A | 16 | 25.263 | 64.425 | 31.428 | H |
| ATOM | 144 | HZ1 | LYS A | 16 | 23.399 | 72.311 | 31.757 | H |
| ATOM | 145 | HZ2 | LYS A | 16 | 24.641 | 71.228 | 32.167 | H |
| ATOM | 146 | HZ3 | LYS A | 16 | 23.695 | 70.955 | 30.782 | H |
| ATOM | 147 | N   | CYS A | 17 | 21.696 | 65.302 | 32.729 | N |
| ATOM | 148 | CA  | CYS A | 17 | 20.947 | 64.579 | 33.797 | C |
| ATOM | 149 | C   | CYS A | 17 | 19.698 | 65.370 | 34.188 | C |
| ATOM | 150 | O   | CYS A | 17 | 18.895 | 65.733 | 33.352 | O |
| ATOM | 151 | CB  | CYS A | 17 | 20.563 | 63.238 | 33.171 | C |
| ATOM | 152 | SG  | CYS A | 17 | 20.875 | 61.906 | 34.356 | S |
| ATOM | 153 | H   | CYS A | 17 | 21.222 | 65.910 | 32.124 | H |
| ATOM | 154 | N   | GLU A | 18 | 19.528 | 65.643 | 35.454 | N |
| ATOM | 155 | CA  | GLU A | 18 | 18.333 | 66.415 | 35.893 | C |
| ATOM | 156 | C   | GLU A | 18 | 17.577 | 65.654 | 36.986 | C |
| ATOM | 157 | O   | GLU A | 18 | 16.382 | 65.449 | 36.900 | O |
| ATOM | 158 | CB  | GLU A | 18 | 18.891 | 67.728 | 36.443 | C |
| ATOM | 159 | CG  | GLU A | 18 | 18.781 | 68.817 | 35.375 | C |
| ATOM | 160 | CD  | GLU A | 18 | 17.432 | 69.526 | 35.507 | C |
| ATOM | 161 | OE1 | GLU A | 18 | 16.694 | 69.187 | 36.418 | O |
| ATOM | 162 | OE2 | GLU A | 18 | 17.159 | 70.396 | 34.697 | O |
| ATOM | 163 | H   | GLU A | 18 | 20.189 | 65.344 | 36.112 | H |
| ATOM | 164 | N   | LYS A | 19 | 18.262 | 65.238 | 38.017 | N |
| ATOM | 165 | CA  | LYS A | 19 | 17.575 | 64.495 | 39.114 | C |
| ATOM | 166 | C   | LYS A | 19 | 18.596 | 63.736 | 39.964 | C |
| ATOM | 167 | O   | LYS A | 19 | 18.660 | 63.900 | 41.168 | O |
| ATOM | 168 | CB  | LYS A | 19 | 16.883 | 65.573 | 39.947 | C |
| ATOM | 169 | CG  | LYS A | 19 | 17.937 | 66.506 | 40.547 | C |
| ATOM | 170 | CD  | LYS A | 19 | 17.547 | 66.861 | 41.982 | C |
| ATOM | 171 | CE  | LYS A | 19 | 16.528 | 68.003 | 41.966 | C |
| ATOM | 172 | NZ  | LYS A | 19 | 15.427 | 67.548 | 42.861 | N |
| ATOM | 173 | H   | LYS A | 19 | 19.223 | 65.414 | 38.071 | H |
| ATOM | 174 | HZ1 | LYS A | 19 | 15.828 | 67.035 | 43.671 | H |
| ATOM | 175 | HZ2 | LYS A | 19 | 14.895 | 68.376 | 43.203 | H |
| ATOM | 176 | HZ3 | LYS A | 19 | 14.790 | 66.919 | 42.335 | H |
| ATOM | 177 | N   | SER A | 20 | 19.394 | 62.904 | 39.352 | N |
| ATOM | 178 | CA  | SER A | 20 | 20.407 | 62.135 | 40.130 | C |

|      |     |     |       |    |        |        |        |   |
|------|-----|-----|-------|----|--------|--------|--------|---|
| ATOM | 179 | C   | SER A | 20 | 19.915 | 60.703 | 40.361 | C |
| ATOM | 180 | O   | SER A | 20 | 18.784 | 60.370 | 40.068 | O |
| ATOM | 181 | CB  | SER A | 20 | 21.663 | 62.137 | 39.261 | C |
| ATOM | 182 | OG  | SER A | 20 | 21.513 | 61.183 | 38.217 | O |
| ATOM | 183 | H   | SER A | 20 | 19.325 | 62.784 | 38.382 | H |
| ATOM | 184 | HG  | SER A | 20 | 20.959 | 61.573 | 37.536 | H |
| ATOM | 185 | N   | THR A | 21 | 20.755 | 59.853 | 40.884 | N |
| ATOM | 186 | CA  | THR A | 21 | 20.334 | 58.445 | 41.132 | C |
| ATOM | 187 | C   | THR A | 21 | 21.427 | 57.479 | 40.665 | C |
| ATOM | 188 | O   | THR A | 21 | 22.013 | 56.762 | 41.450 | O |
| ATOM | 189 | CB  | THR A | 21 | 20.142 | 58.350 | 42.647 | C |
| ATOM | 190 | OG1 | THR A | 21 | 19.513 | 59.535 | 43.117 | O |
| ATOM | 191 | CG2 | THR A | 21 | 19.267 | 57.141 | 42.979 | C |
| ATOM | 192 | H   | THR A | 21 | 21.664 | 60.141 | 41.114 | H |
| ATOM | 193 | HG1 | THR A | 21 | 19.439 | 59.473 | 44.071 | H |
| ATOM | 194 | N   | LEU A | 22 | 21.706 | 57.461 | 39.390 | N |
| ATOM | 195 | CA  | LEU A | 22 | 22.764 | 56.547 | 38.869 | C |
| ATOM | 196 | C   | LEU A | 22 | 22.225 | 55.120 | 38.741 | C |
| ATOM | 197 | O   | LEU A | 22 | 21.083 | 54.846 | 39.053 | O |
| ATOM | 198 | CB  | LEU A | 22 | 23.127 | 57.104 | 37.488 | C |
| ATOM | 199 | CG  | LEU A | 22 | 23.238 | 58.632 | 37.540 | C |
| ATOM | 200 | CD1 | LEU A | 22 | 24.096 | 59.108 | 36.367 | C |
| ATOM | 201 | CD2 | LEU A | 22 | 23.897 | 59.072 | 38.851 | C |
| ATOM | 202 | H   | LEU A | 22 | 21.224 | 58.051 | 38.774 | H |
| ATOM | 203 | N   | THR A | 23 | 23.039 | 54.211 | 38.276 | N |
| ATOM | 204 | CA  | THR A | 23 | 22.577 | 52.801 | 38.118 | C |
| ATOM | 205 | C   | THR A | 23 | 23.544 | 52.030 | 37.214 | C |
| ATOM | 206 | O   | THR A | 23 | 24.713 | 51.891 | 37.513 | O |
| ATOM | 207 | CB  | THR A | 23 | 22.587 | 52.215 | 39.530 | C |
| ATOM | 208 | OG1 | THR A | 23 | 21.560 | 52.829 | 40.301 | O |
| ATOM | 209 | CG2 | THR A | 23 | 22.351 | 50.703 | 39.455 | C |
| ATOM | 210 | H   | THR A | 23 | 23.954 | 54.457 | 38.027 | H |
| ATOM | 211 | HG1 | THR A | 23 | 20.964 | 52.143 | 40.610 | H |
| ATOM | 212 | N   | ASN A | 24 | 23.066 | 51.533 | 36.107 | N |
| ATOM | 213 | CA  | ASN A | 24 | 23.958 | 50.776 | 35.183 | C |
| ATOM | 214 | C   | ASN A | 24 | 25.130 | 51.660 | 34.752 | C |

|      |     |     |       |    |        |        |        |   |
|------|-----|-----|-------|----|--------|--------|--------|---|
| ATOM | 215 | O   | ASN A | 24 | 26.270 | 51.241 | 34.757 | O |
| ATOM | 216 | CB  | ASN A | 24 | 24.461 | 49.583 | 35.996 | C |
| ATOM | 217 | CG  | ASN A | 24 | 23.555 | 48.376 | 35.746 | C |
| ATOM | 218 | OD1 | ASN A | 24 | 23.023 | 47.800 | 36.673 | O |
| ATOM | 219 | ND2 | ASN A | 24 | 23.354 | 47.969 | 34.523 | N |
| ATOM | 220 | H   | ASN A | 24 | 22.121 | 51.659 | 35.881 | H |
| ATOM | 221 | HD2 | ASN A | 24 | 23.783 | 48.435 | 33.775 | H |
| ATOM | 222 | HD2 | ASN A | 24 | 22.775 | 47.197 | 34.352 | H |
| ATOM | 223 | N   | CYS A | 25 | 24.859 | 52.881 | 34.385 | N |
| ATOM | 224 | CA  | CYS A | 25 | 25.961 | 53.788 | 33.963 | C |
| ATOM | 225 | C   | CYS A | 25 | 25.954 | 53.982 | 32.446 | C |
| ATOM | 226 | O   | CYS A | 25 | 25.460 | 53.164 | 31.696 | O |
| ATOM | 227 | CB  | CYS A | 25 | 25.680 | 55.123 | 34.659 | C |
| ATOM | 228 | SG  | CYS A | 25 | 27.086 | 55.569 | 35.710 | S |
| ATOM | 229 | H   | CYS A | 25 | 23.933 | 53.203 | 34.391 | H |
| ATOM | 230 | N   | TYR A | 26 | 26.501 | 55.076 | 32.007 | N |
| ATOM | 231 | CA  | TYR A | 26 | 26.553 | 55.388 | 30.556 | C |
| ATOM | 232 | C   | TYR A | 26 | 26.962 | 56.849 | 30.417 | C |
| ATOM | 233 | O   | TYR A | 26 | 26.423 | 57.595 | 29.625 | O |
| ATOM | 234 | CB  | TYR A | 26 | 27.623 | 54.454 | 29.984 | C |
| ATOM | 235 | CG  | TYR A | 26 | 28.097 | 54.979 | 28.650 | C |
| ATOM | 236 | CD1 | TYR A | 26 | 29.077 | 55.978 | 28.598 | C |
| ATOM | 237 | CD2 | TYR A | 26 | 27.559 | 54.464 | 27.465 | C |
| ATOM | 238 | CE1 | TYR A | 26 | 29.519 | 56.460 | 27.360 | C |
| ATOM | 239 | CE2 | TYR A | 26 | 28.001 | 54.948 | 26.228 | C |
| ATOM | 240 | CZ  | TYR A | 26 | 28.981 | 55.945 | 26.175 | C |
| ATOM | 241 | OH  | TYR A | 26 | 29.417 | 56.421 | 24.956 | O |
| ATOM | 242 | H   | TYR A | 26 | 26.884 | 55.711 | 32.647 | H |
| ATOM | 243 | HH  | TYR A | 26 | 29.359 | 57.379 | 24.974 | H |
| ATOM | 244 | N   | VAL A | 27 | 27.895 | 57.257 | 31.231 | N |
| ATOM | 245 | CA  | VAL A | 27 | 28.353 | 58.672 | 31.229 | C |
| ATOM | 246 | C   | VAL A | 27 | 28.799 | 59.122 | 29.834 | C |
| ATOM | 247 | O   | VAL A | 27 | 28.307 | 58.666 | 28.823 | O |
| ATOM | 248 | CB  | VAL A | 27 | 27.135 | 59.467 | 31.692 | C |
| ATOM | 249 | CG1 | VAL A | 27 | 27.559 | 60.902 | 32.018 | C |
| ATOM | 250 | CG2 | VAL A | 27 | 26.541 | 58.804 | 32.946 | C |

|      |     |     |       |    |        |        |        |   |
|------|-----|-----|-------|----|--------|--------|--------|---|
| ATOM | 251 | H   | VAL A | 27 | 28.278 | 56.629 | 31.873 | H |
| ATOM | 252 | N   | ASP A | 28 | 29.734 | 60.029 | 29.793 | N |
| ATOM | 253 | CA  | ASP A | 28 | 30.238 | 60.551 | 28.490 | C |
| ATOM | 254 | C   | ASP A | 28 | 30.842 | 61.938 | 28.710 | C |
| ATOM | 255 | O   | ASP A | 28 | 31.742 | 62.110 | 29.509 | O |
| ATOM | 256 | CB  | ASP A | 28 | 31.311 | 59.556 | 28.047 | C |
| ATOM | 257 | CG  | ASP A | 28 | 31.423 | 59.569 | 26.521 | C |
| ATOM | 258 | OD1 | ASP A | 28 | 31.527 | 60.650 | 25.966 | O |
| ATOM | 259 | OD2 | ASP A | 28 | 31.404 | 58.500 | 25.936 | O |
| ATOM | 260 | H   | ASP A | 28 | 30.104 | 60.380 | 30.630 | H |
| ATOM | 261 | N   | LYS A | 29 | 30.354 | 62.935 | 28.027 | N |
| ATOM | 262 | CA  | LYS A | 29 | 30.906 | 64.305 | 28.228 | C |
| ATOM | 263 | C   | LYS A | 29 | 30.955 | 64.621 | 29.726 | C |
| ATOM | 264 | O   | LYS A | 29 | 31.989 | 64.957 | 30.266 | O |
| ATOM | 265 | CB  | LYS A | 29 | 32.319 | 64.254 | 27.645 | C |
| ATOM | 266 | CG  | LYS A | 29 | 32.245 | 63.951 | 26.147 | C |
| ATOM | 267 | CD  | LYS A | 29 | 33.594 | 63.413 | 25.667 | C |
| ATOM | 268 | CE  | LYS A | 29 | 34.529 | 64.582 | 25.347 | C |
| ATOM | 269 | NZ  | LYS A | 29 | 34.457 | 64.740 | 23.867 | N |
| ATOM | 270 | H   | LYS A | 29 | 29.619 | 62.786 | 27.393 | H |
| ATOM | 271 | HZ1 | LYS A | 29 | 33.569 | 64.331 | 23.516 | H |
| ATOM | 272 | HZ2 | LYS A | 29 | 34.493 | 65.752 | 23.624 | H |
| ATOM | 273 | HZ3 | LYS A | 29 | 35.261 | 64.248 | 23.426 | H |
| ATOM | 274 | N   | SER A | 30 | 29.845 | 64.509 | 30.404 | N |
| ATOM | 275 | CA  | SER A | 30 | 29.835 | 64.796 | 31.868 | C |
| ATOM | 276 | C   | SER A | 30 | 28.529 | 65.486 | 32.268 | C |
| ATOM | 277 | O   | SER A | 30 | 27.703 | 65.806 | 31.435 | O |
| ATOM | 278 | CB  | SER A | 30 | 29.942 | 63.426 | 32.536 | C |
| ATOM | 279 | OG  | SER A | 30 | 31.251 | 62.908 | 32.334 | O |
| ATOM | 280 | H   | SER A | 30 | 29.022 | 64.231 | 29.953 | H |
| ATOM | 281 | HG  | SER A | 30 | 31.315 | 62.609 | 31.424 | H |
| ATOM | 282 | N   | GLU A | 31 | 28.336 | 65.722 | 33.539 | N |
| ATOM | 283 | CA  | GLU A | 31 | 27.085 | 66.395 | 33.991 | C |
| ATOM | 284 | C   | GLU A | 31 | 26.411 | 65.589 | 35.106 | C |
| ATOM | 285 | O   | GLU A | 31 | 25.337 | 65.049 | 34.931 | O |
| ATOM | 286 | CB  | GLU A | 31 | 27.539 | 67.759 | 34.516 | C |

|      |     |     |       |    |        |        |        |   |
|------|-----|-----|-------|----|--------|--------|--------|---|
| ATOM | 287 | CG  | GLU A | 31 | 27.578 | 68.763 | 33.362 | C |
| ATOM | 288 | CD  | GLU A | 31 | 28.635 | 69.832 | 33.649 | C |
| ATOM | 289 | OE1 | GLU A | 31 | 28.303 | 70.802 | 34.310 | O |
| ATOM | 290 | OE2 | GLU A | 31 | 29.758 | 69.661 | 33.202 | O |
| ATOM | 291 | H   | GLU A | 31 | 29.016 | 65.459 | 34.194 | H |
| ATOM | 292 | N   | VAL A | 32 | 27.030 | 65.507 | 36.253 | N |
| ATOM | 293 | CA  | VAL A | 32 | 26.420 | 64.740 | 37.380 | C |
| ATOM | 294 | C   | VAL A | 32 | 25.092 | 65.374 | 37.795 | C |
| ATOM | 295 | O   | VAL A | 32 | 24.434 | 66.032 | 37.012 | O |
| ATOM | 296 | CB  | VAL A | 32 | 26.200 | 63.330 | 36.834 | C |
| ATOM | 297 | CG1 | VAL A | 32 | 25.889 | 62.381 | 37.993 | C |
| ATOM | 298 | CG2 | VAL A | 32 | 27.468 | 62.859 | 36.120 | C |
| ATOM | 299 | H   | VAL A | 32 | 27.893 | 65.954 | 36.376 | H |
| ATOM | 300 | N   | TYR A | 33 | 24.696 | 65.188 | 39.025 | N |
| ATOM | 301 | CA  | TYR A | 33 | 23.414 | 65.787 | 39.495 | C |
| ATOM | 302 | C   | TYR A | 33 | 22.790 | 64.913 | 40.589 | C |
| ATOM | 303 | O   | TYR A | 33 | 21.601 | 64.672 | 40.601 | O |
| ATOM | 304 | CB  | TYR A | 33 | 23.802 | 67.154 | 40.058 | C |
| ATOM | 305 | CG  | TYR A | 33 | 23.838 | 68.167 | 38.939 | C |
| ATOM | 306 | CD1 | TYR A | 33 | 22.678 | 68.868 | 38.592 | C |
| ATOM | 307 | CD2 | TYR A | 33 | 25.034 | 68.405 | 38.249 | C |
| ATOM | 308 | CE1 | TYR A | 33 | 22.712 | 69.807 | 37.554 | C |
| ATOM | 309 | CE2 | TYR A | 33 | 25.067 | 69.343 | 37.211 | C |
| ATOM | 310 | CZ  | TYR A | 33 | 23.907 | 70.044 | 36.863 | C |
| ATOM | 311 | OH  | TYR A | 33 | 23.940 | 70.970 | 35.840 | O |
| ATOM | 312 | H   | TYR A | 33 | 25.244 | 64.660 | 39.640 | H |
| ATOM | 313 | HH  | TYR A | 33 | 23.636 | 71.810 | 36.191 | H |
| ATOM | 314 | N   | GLY A | 34 | 23.587 | 64.439 | 41.508 | N |
| ATOM | 315 | CA  | GLY A | 34 | 23.042 | 63.582 | 42.599 | C |
| ATOM | 316 | C   | GLY A | 34 | 23.993 | 62.411 | 42.850 | C |
| ATOM | 317 | O   | GLY A | 34 | 24.039 | 61.857 | 43.930 | O |
| ATOM | 318 | H   | GLY A | 34 | 24.545 | 64.646 | 41.480 | H |
| ATOM | 319 | N   | THR A | 35 | 24.756 | 62.036 | 41.862 | N |
| ATOM | 320 | CA  | THR A | 35 | 25.709 | 60.903 | 42.043 | C |
| ATOM | 321 | C   | THR A | 35 | 24.954 | 59.573 | 42.123 | C |
| ATOM | 322 | O   | THR A | 35 | 23.890 | 59.417 | 41.558 | O |

|      |     |     |       |    |        |        |        |   |
|------|-----|-----|-------|----|--------|--------|--------|---|
| ATOM | 323 | CB  | THR A | 35 | 26.603 | 60.937 | 40.802 | C |
| ATOM | 324 | OG1 | THR A | 35 | 27.498 | 62.035 | 40.894 | O |
| ATOM | 325 | CG2 | THR A | 35 | 27.398 | 59.633 | 40.711 | C |
| ATOM | 326 | H   | THR A | 35 | 24.705 | 62.500 | 41.000 | H |
| ATOM | 327 | HG1 | THR A | 35 | 26.987 | 62.843 | 40.804 | H |
| ATOM | 328 | N   | THR A | 36 | 25.501 | 58.612 | 42.816 | N |
| ATOM | 329 | CA  | THR A | 36 | 24.820 | 57.290 | 42.927 | C |
| ATOM | 330 | C   | THR A | 36 | 25.589 | 56.238 | 42.122 | C |
| ATOM | 331 | O   | THR A | 36 | 25.990 | 55.216 | 42.641 | O |
| ATOM | 332 | CB  | THR A | 36 | 24.844 | 56.951 | 44.419 | C |
| ATOM | 333 | OG1 | THR A | 36 | 24.250 | 58.012 | 45.153 | O |
| ATOM | 334 | CG2 | THR A | 36 | 24.065 | 55.658 | 44.664 | C |
| ATOM | 335 | H   | THR A | 36 | 26.362 | 58.758 | 43.260 | H |
| ATOM | 336 | HG1 | THR A | 36 | 23.604 | 58.443 | 44.585 | H |
| ATOM | 337 | N   | CYS A | 37 | 25.796 | 56.486 | 40.857 | N |
| ATOM | 338 | CA  | CYS A | 37 | 26.540 | 55.509 | 40.007 | C |
| ATOM | 339 | C   | CYS A | 37 | 26.125 | 54.077 | 40.355 | C |
| ATOM | 340 | O   | CYS A | 37 | 24.970 | 53.799 | 40.603 | O |
| ATOM | 341 | CB  | CYS A | 37 | 26.139 | 55.855 | 38.573 | C |
| ATOM | 342 | SG  | CYS A | 37 | 26.752 | 54.582 | 37.441 | S |
| ATOM | 343 | H   | CYS A | 37 | 25.465 | 57.319 | 40.463 | H |
| ATOM | 344 | N   | THR A | 38 | 27.061 | 53.167 | 40.374 | N |
| ATOM | 345 | CA  | THR A | 38 | 26.721 | 51.752 | 40.706 | C |
| ATOM | 346 | C   | THR A | 38 | 27.174 | 50.828 | 39.573 | C |
| ATOM | 347 | O   | THR A | 38 | 27.223 | 49.624 | 39.721 | O |
| ATOM | 348 | CB  | THR A | 38 | 27.494 | 51.449 | 41.990 | C |
| ATOM | 349 | OG1 | THR A | 38 | 27.052 | 52.321 | 43.023 | O |
| ATOM | 350 | CG2 | THR A | 38 | 27.253 | 49.996 | 42.404 | C |
| ATOM | 351 | H   | THR A | 38 | 27.987 | 53.413 | 40.173 | H |
| ATOM | 352 | HG1 | THR A | 38 | 27.026 | 51.822 | 43.842 | H |
| ATOM | 353 | N   | GLY A | 39 | 27.508 | 51.388 | 38.445 | N |
| ATOM | 354 | CA  | GLY A | 39 | 27.960 | 50.557 | 37.298 | C |
| ATOM | 355 | C   | GLY A | 39 | 29.289 | 51.105 | 36.773 | C |
| ATOM | 356 | O   | GLY A | 39 | 30.256 | 50.385 | 36.625 | O |
| ATOM | 357 | H   | GLY A | 39 | 27.461 | 52.359 | 38.350 | H |
| ATOM | 358 | N   | SER A | 40 | 29.342 | 52.381 | 36.494 | N |



|      |     |     |       |    |        |        |        |   |
|------|-----|-----|-------|----|--------|--------|--------|---|
| ATOM | 359 | CA  | SER A | 40 | 30.608 | 52.984 | 35.982 | C |
| ATOM | 360 | C   | SER A | 40 | 30.313 | 53.904 | 34.793 | C |
| ATOM | 361 | O   | SER A | 40 | 29.219 | 53.920 | 34.264 | O |
| ATOM | 362 | CB  | SER A | 40 | 31.163 | 53.789 | 37.155 | C |
| ATOM | 363 | OG  | SER A | 40 | 30.896 | 53.096 | 38.368 | O |
| ATOM | 364 | H   | SER A | 40 | 28.551 | 52.943 | 36.625 | H |
| ATOM | 365 | HG  | SER A | 40 | 31.413 | 53.508 | 39.063 | H |
| ATOM | 366 | N   | ARG A | 41 | 31.281 | 54.671 | 34.371 | N |
| ATOM | 367 | CA  | ARG A | 41 | 31.057 | 55.589 | 33.216 | C |
| ATOM | 368 | C   | ARG A | 41 | 31.892 | 56.863 | 33.384 | C |
| ATOM | 369 | O   | ARG A | 41 | 32.734 | 56.954 | 34.257 | O |
| ATOM | 370 | CB  | ARG A | 41 | 31.520 | 54.804 | 31.989 | C |
| ATOM | 371 | CG  | ARG A | 41 | 33.049 | 54.738 | 31.967 | C |
| ATOM | 372 | CD  | ARG A | 41 | 33.588 | 55.743 | 30.945 | C |
| ATOM | 373 | NE  | ARG A | 41 | 34.888 | 55.171 | 30.493 | N |
| ATOM | 374 | CZ  | ARG A | 41 | 35.235 | 55.251 | 29.237 | C |
| ATOM | 375 | NH1 | ARG A | 41 | 34.356 | 55.012 | 28.302 | N |
| ATOM | 376 | NH2 | ARG A | 41 | 36.458 | 55.567 | 28.917 | N |
| ATOM | 377 | H   | ARG A | 41 | 32.156 | 54.643 | 34.812 | H |
| ATOM | 378 | HE  | ARG A | 41 | 35.482 | 54.734 | 31.138 | H |
| ATOM | 379 | HH1 | ARG A | 41 | 33.418 | 54.767 | 28.547 | H |
| ATOM | 380 | HH1 | ARG A | 41 | 34.621 | 55.074 | 27.339 | H |
| ATOM | 381 | HH2 | ARG A | 41 | 37.132 | 55.748 | 29.633 | H |
| ATOM | 382 | HH2 | ARG A | 41 | 36.724 | 55.630 | 27.955 | H |
| ATOM | 383 | N   | PHE A | 42 | 31.669 | 57.845 | 32.555 | N |
| ATOM | 384 | CA  | PHE A | 42 | 32.453 | 59.110 | 32.665 | C |
| ATOM | 385 | C   | PHE A | 42 | 33.004 | 59.509 | 31.293 | C |
| ATOM | 386 | O   | PHE A | 42 | 32.759 | 58.851 | 30.302 | O |
| ATOM | 387 | CB  | PHE A | 42 | 31.457 | 60.155 | 33.167 | C |
| ATOM | 388 | CG  | PHE A | 42 | 30.818 | 59.667 | 34.445 | C |
| ATOM | 389 | CD1 | PHE A | 42 | 31.605 | 59.080 | 35.443 | C |
| ATOM | 390 | CD2 | PHE A | 42 | 29.436 | 59.800 | 34.630 | C |
| ATOM | 391 | CE1 | PHE A | 42 | 31.011 | 58.626 | 36.627 | C |
| ATOM | 392 | CE2 | PHE A | 42 | 28.842 | 59.346 | 35.813 | C |
| ATOM | 393 | CZ  | PHE A | 42 | 29.629 | 58.760 | 36.810 | C |
| ATOM | 394 | H   | PHE A | 42 | 30.988 | 57.752 | 31.857 | H |

|      |     |     |       |    |        |        |        |   |
|------|-----|-----|-------|----|--------|--------|--------|---|
| ATOM | 395 | N   | ASP A | 43 | 33.744 | 60.580 | 31.230 | N |
| ATOM | 396 | CA  | ASP A | 43 | 34.308 | 61.017 | 29.921 | C |
| ATOM | 397 | C   | ASP A | 43 | 34.911 | 62.416 | 30.046 | C |
| ATOM | 398 | O   | ASP A | 43 | 36.105 | 62.603 | 29.919 | O |
| ATOM | 399 | CB  | ASP A | 43 | 35.394 | 59.991 | 29.593 | C |
| ATOM | 400 | CG  | ASP A | 43 | 35.329 | 59.637 | 28.105 | C |
| ATOM | 401 | OD1 | ASP A | 43 | 35.439 | 60.544 | 27.296 | O |
| ATOM | 402 | OD2 | ASP A | 43 | 35.169 | 58.467 | 27.801 | O |
| ATOM | 403 | H   | ASP A | 43 | 33.930 | 61.097 | 32.042 | H |
| ATOM | 404 | N   | GLY A | 44 | 34.092 | 63.400 | 30.293 | N |
| ATOM | 405 | CA  | GLY A | 44 | 34.617 | 64.786 | 30.422 | C |
| ATOM | 406 | C   | GLY A | 44 | 34.670 | 65.177 | 31.896 | C |
| ATOM | 407 | O   | GLY A | 44 | 35.674 | 65.656 | 32.382 | O |
| ATOM | 408 | H   | GLY A | 44 | 33.133 | 63.228 | 30.389 | H |
| ATOM | 409 | N   | VAL A | 45 | 33.610 | 64.974 | 32.623 | N |
| ATOM | 410 | CA  | VAL A | 45 | 33.648 | 65.335 | 34.068 | C |
| ATOM | 411 | C   | VAL A | 45 | 32.494 | 66.275 | 34.428 | C |
| ATOM | 412 | O   | VAL A | 45 | 31.722 | 66.690 | 33.587 | O |
| ATOM | 413 | CB  | VAL A | 45 | 33.535 | 64.002 | 34.832 | C |
| ATOM | 414 | CG1 | VAL A | 45 | 34.205 | 62.882 | 34.028 | C |
| ATOM | 415 | CG2 | VAL A | 45 | 32.063 | 63.648 | 35.062 | C |
| ATOM | 416 | H   | VAL A | 45 | 32.802 | 64.578 | 32.230 | H |
| ATOM | 417 | N   | THR A | 46 | 32.384 | 66.602 | 35.681 | N |
| ATOM | 418 | CA  | THR A | 46 | 31.297 | 67.508 | 36.139 | C |
| ATOM | 419 | C   | THR A | 46 | 30.982 | 67.206 | 37.602 | C |
| ATOM | 420 | O   | THR A | 46 | 31.042 | 68.070 | 38.454 | O |
| ATOM | 421 | CB  | THR A | 46 | 31.876 | 68.912 | 35.991 | C |
| ATOM | 422 | OG1 | THR A | 46 | 32.127 | 69.178 | 34.618 | O |
| ATOM | 423 | CG2 | THR A | 46 | 30.883 | 69.939 | 36.540 | C |
| ATOM | 424 | H   | THR A | 46 | 33.024 | 66.247 | 36.333 | H |
| ATOM | 425 | HG1 | THR A | 46 | 32.822 | 69.839 | 34.566 | H |
| ATOM | 426 | N   | ILE A | 47 | 30.670 | 65.976 | 37.903 | N |
| ATOM | 427 | CA  | ILE A | 47 | 30.377 | 65.605 | 39.314 | C |
| ATOM | 428 | C   | ILE A | 47 | 28.930 | 65.949 | 39.680 | C |
| ATOM | 429 | O   | ILE A | 47 | 28.148 | 66.364 | 38.850 | O |
| ATOM | 430 | CB  | ILE A | 47 | 30.612 | 64.093 | 39.374 | C |

|      |     |     |       |    |        |        |        |   |
|------|-----|-----|-------|----|--------|--------|--------|---|
| ATOM | 431 | CG1 | ILE A | 47 | 30.334 | 63.583 | 40.791 | C |
| ATOM | 432 | CG2 | ILE A | 47 | 29.679 | 63.389 | 38.387 | C |
| ATOM | 433 | CD1 | ILE A | 47 | 31.065 | 62.257 | 41.010 | C |
| ATOM | 434 | H   | ILE A | 47 | 30.645 | 65.291 | 37.201 | H |
| ATOM | 435 | N   | THR A | 48 | 28.577 | 65.785 | 40.925 | N |
| ATOM | 436 | CA  | THR A | 48 | 27.188 | 66.097 | 41.367 | C |
| ATOM | 437 | C   | THR A | 48 | 26.778 | 65.121 | 42.479 | C |
| ATOM | 438 | O   | THR A | 48 | 27.033 | 63.937 | 42.394 | O |
| ATOM | 439 | CB  | THR A | 48 | 27.260 | 67.533 | 41.892 | C |
| ATOM | 440 | OG1 | THR A | 48 | 28.266 | 67.619 | 42.893 | O |
| ATOM | 441 | CG2 | THR A | 48 | 27.597 | 68.479 | 40.736 | C |
| ATOM | 442 | H   | THR A | 48 | 29.229 | 65.457 | 41.578 | H |
| ATOM | 443 | HG1 | THR A | 48 | 28.808 | 68.390 | 42.709 | H |
| ATOM | 444 | N   | THR A | 49 | 26.155 | 65.603 | 43.518 | N |
| ATOM | 445 | CA  | THR A | 49 | 25.748 | 64.691 | 44.625 | C |
| ATOM | 446 | C   | THR A | 49 | 26.973 | 63.980 | 45.196 | C |
| ATOM | 447 | O   | THR A | 49 | 27.518 | 64.392 | 46.196 | O |
| ATOM | 448 | CB  | THR A | 49 | 25.146 | 65.606 | 45.687 | C |
| ATOM | 449 | OG1 | THR A | 49 | 24.011 | 66.273 | 45.151 | O |
| ATOM | 450 | CG2 | THR A | 49 | 24.732 | 64.773 | 46.899 | C |
| ATOM | 451 | H   | THR A | 49 | 25.961 | 66.559 | 43.578 | H |
| ATOM | 452 | HG1 | THR A | 49 | 24.180 | 66.445 | 44.222 | H |
| ATOM | 453 | N   | SER A | 50 | 27.417 | 62.923 | 44.578 | N |
| ATOM | 454 | CA  | SER A | 50 | 28.616 | 62.212 | 45.110 | C |
| ATOM | 455 | C   | SER A | 50 | 28.468 | 60.699 | 44.952 | C |
| ATOM | 456 | O   | SER A | 50 | 27.896 | 60.217 | 43.994 | O |
| ATOM | 457 | CB  | SER A | 50 | 29.779 | 62.725 | 44.262 | C |
| ATOM | 458 | OG  | SER A | 50 | 30.958 | 62.008 | 44.601 | O |
| ATOM | 459 | H   | SER A | 50 | 26.970 | 62.598 | 43.768 | H |
| ATOM | 460 | HG  | SER A | 50 | 30.980 | 61.206 | 44.074 | H |
| ATOM | 461 | N   | THR A | 51 | 28.986 | 59.941 | 45.881 | N |
| ATOM | 462 | CA  | THR A | 51 | 28.876 | 58.458 | 45.772 | C |
| ATOM | 463 | C   | THR A | 51 | 30.168 | 57.873 | 45.200 | C |
| ATOM | 464 | O   | THR A | 51 | 31.250 | 58.138 | 45.683 | O |
| ATOM | 465 | CB  | THR A | 51 | 28.661 | 57.962 | 47.200 | C |
| ATOM | 466 | OG1 | THR A | 51 | 28.193 | 59.032 | 48.008 | O |

|      |     |     |     |   |    |        |        |        |   |
|------|-----|-----|-----|---|----|--------|--------|--------|---|
| ATOM | 467 | CG2 | THR | A | 51 | 27.636 | 56.827 | 47.203 | C |
| ATOM | 468 | H   | THR | A | 51 | 29.448 | 60.346 | 46.648 | H |
| ATOM | 469 | HG1 | THR | A | 51 | 28.263 | 58.762 | 48.927 | H |
| ATOM | 470 | N   | SER | A | 52 | 30.061 | 57.073 | 44.177 | N |
| ATOM | 471 | CA  | SER | A | 52 | 31.280 | 56.462 | 43.570 | C |
| ATOM | 472 | C   | SER | A | 52 | 30.996 | 55.013 | 43.161 | C |
| ATOM | 473 | O   | SER | A | 52 | 30.018 | 54.728 | 42.498 | O |
| ATOM | 474 | CB  | SER | A | 52 | 31.581 | 57.316 | 42.339 | C |
| ATOM | 475 | OG  | SER | A | 52 | 31.074 | 56.664 | 41.182 | O |
| ATOM | 476 | H   | SER | A | 52 | 29.178 | 56.875 | 43.807 | H |
| ATOM | 477 | HG  | SER | A | 52 | 31.491 | 57.059 | 40.412 | H |
| ATOM | 478 | N   | THR | A | 53 | 31.845 | 54.099 | 43.545 | N |
| ATOM | 479 | CA  | THR | A | 53 | 31.619 | 52.671 | 43.169 | C |
| ATOM | 480 | C   | THR | A | 53 | 32.601 | 52.261 | 42.071 | C |
| ATOM | 481 | O   | THR | A | 53 | 33.775 | 52.065 | 42.316 | O |
| ATOM | 482 | CB  | THR | A | 53 | 31.883 | 51.877 | 44.449 | C |
| ATOM | 483 | OG1 | THR | A | 53 | 31.511 | 52.659 | 45.575 | O |
| ATOM | 484 | CG2 | THR | A | 53 | 31.064 | 50.585 | 44.428 | C |
| ATOM | 485 | H   | THR | A | 53 | 32.631 | 54.348 | 44.077 | H |
| ATOM | 486 | HG1 | THR | A | 53 | 31.733 | 52.162 | 46.367 | H |
| ATOM | 487 | N   | GLY | A | 54 | 32.136 | 52.139 | 40.858 | N |
| ATOM | 488 | CA  | GLY | A | 54 | 33.054 | 51.750 | 39.750 | C |
| ATOM | 489 | C   | GLY | A | 54 | 34.272 | 52.673 | 39.772 | C |
| ATOM | 490 | O   | GLY | A | 54 | 35.250 | 52.407 | 40.441 | O |
| ATOM | 491 | H   | GLY | A | 54 | 31.188 | 52.308 | 40.674 | H |
| ATOM | 492 | N   | SER | A | 55 | 34.217 | 53.762 | 39.055 | N |
| ATOM | 493 | CA  | SER | A | 55 | 35.372 | 54.704 | 39.050 | C |
| ATOM | 494 | C   | SER | A | 55 | 35.392 | 55.522 | 37.759 | C |
| ATOM | 495 | O   | SER | A | 55 | 34.472 | 56.259 | 37.463 | O |
| ATOM | 496 | CB  | SER | A | 55 | 35.137 | 55.616 | 40.254 | C |
| ATOM | 497 | OG  | SER | A | 55 | 33.777 | 56.032 | 40.269 | O |
| ATOM | 498 | H   | SER | A | 55 | 33.418 | 53.963 | 38.528 | H |
| ATOM | 499 | HG  | SER | A | 55 | 33.468 | 56.005 | 41.178 | H |
| ATOM | 500 | N   | ARG | A | 56 | 36.440 | 55.405 | 36.988 | N |
| ATOM | 501 | CA  | ARG | A | 56 | 36.525 | 56.183 | 35.721 | C |
| ATOM | 502 | C   | ARG | A | 56 | 36.784 | 57.660 | 36.038 | C |

|      |     |     |       |    |        |        |        |   |
|------|-----|-----|-------|----|--------|--------|--------|---|
| ATOM | 503 | O   | ARG A | 56 | 37.892 | 58.051 | 36.348 | O |
| ATOM | 504 | CB  | ARG A | 56 | 37.712 | 55.578 | 34.969 | C |
| ATOM | 505 | CG  | ARG A | 56 | 37.479 | 55.703 | 33.462 | C |
| ATOM | 506 | CD  | ARG A | 56 | 38.654 | 56.446 | 32.825 | C |
| ATOM | 507 | NE  | ARG A | 56 | 39.633 | 55.386 | 32.458 | N |
| ATOM | 508 | CZ  | ARG A | 56 | 40.749 | 55.706 | 31.861 | C |
| ATOM | 509 | NH1 | ARG A | 56 | 41.670 | 56.366 | 32.509 | N |
| ATOM | 510 | NH2 | ARG A | 56 | 40.944 | 55.364 | 30.617 | N |
| ATOM | 511 | H   | ARG A | 56 | 37.174 | 54.811 | 37.249 | H |
| ATOM | 512 | HE  | ARG A | 56 | 39.439 | 54.448 | 32.666 | H |
| ATOM | 513 | HH1 | ARG A | 56 | 41.521 | 56.627 | 33.462 | H |
| ATOM | 514 | HH1 | ARG A | 56 | 42.525 | 56.612 | 32.051 | H |
| ATOM | 515 | HH2 | ARG A | 56 | 40.238 | 54.856 | 30.121 | H |
| ATOM | 516 | HH2 | ARG A | 56 | 41.798 | 55.609 | 30.160 | H |
| ATOM | 517 | N   | ILE A | 57 | 35.773 | 58.481 | 35.969 | N |
| ATOM | 518 | CA  | ILE A | 57 | 35.970 | 59.927 | 36.277 | C |
| ATOM | 519 | C   | ILE A | 57 | 36.482 | 60.668 | 35.039 | C |
| ATOM | 520 | O   | ILE A | 57 | 36.501 | 61.882 | 34.995 | O |
| ATOM | 521 | CB  | ILE A | 57 | 34.585 | 60.436 | 36.680 | C |
| ATOM | 522 | CG1 | ILE A | 57 | 33.936 | 59.441 | 37.649 | C |
| ATOM | 523 | CG2 | ILE A | 57 | 34.722 | 61.797 | 37.365 | C |
| ATOM | 524 | CD1 | ILE A | 57 | 34.954 | 59.009 | 38.709 | C |
| ATOM | 525 | H   | ILE A | 57 | 34.885 | 58.149 | 35.722 | H |
| ATOM | 526 | N   | SER A | 58 | 36.900 | 59.946 | 34.037 | N |
| ATOM | 527 | CA  | SER A | 58 | 37.414 | 60.607 | 32.802 | C |
| ATOM | 528 | C   | SER A | 58 | 38.317 | 61.791 | 33.166 | C |
| ATOM | 529 | O   | SER A | 58 | 38.919 | 61.823 | 34.220 | O |
| ATOM | 530 | CB  | SER A | 58 | 38.225 | 59.527 | 32.092 | C |
| ATOM | 531 | OG  | SER A | 58 | 37.424 | 58.921 | 31.088 | O |
| ATOM | 532 | H   | SER A | 58 | 36.878 | 58.967 | 34.095 | H |
| ATOM | 533 | HG  | SER A | 58 | 36.753 | 58.390 | 31.522 | H |
| ATOM | 534 | N   | GLY A | 59 | 38.418 | 62.762 | 32.297 | N |
| ATOM | 535 | CA  | GLY A | 59 | 39.286 | 63.935 | 32.596 | C |
| ATOM | 536 | C   | GLY A | 59 | 38.867 | 65.121 | 31.728 | C |
| ATOM | 537 | O   | GLY A | 59 | 37.709 | 65.277 | 31.409 | O |
| ATOM | 538 | H   | GLY A | 59 | 37.924 | 62.719 | 31.450 | H |

|      |     |     |       |    |        |        |        |   |
|------|-----|-----|-------|----|--------|--------|--------|---|
| ATOM | 539 | N   | PRO A | 60 | 39.832 | 65.924 | 31.378 | N |
| ATOM | 540 | CA  | PRO A | 60 | 39.559 | 67.118 | 30.548 | C |
| ATOM | 541 | C   | PRO A | 60 | 38.928 | 68.216 | 31.411 | C |
| ATOM | 542 | O   | PRO A | 60 | 39.418 | 69.325 | 31.481 | O |
| ATOM | 543 | CB  | PRO A | 60 | 40.941 | 67.536 | 30.056 | C |
| ATOM | 544 | CG  | PRO A | 60 | 41.900 | 66.996 | 31.073 | C |
| ATOM | 545 | CD  | PRO A | 60 | 41.252 | 65.793 | 31.714 | C |
| ATOM | 546 | N   | GLY A | 61 | 37.845 | 67.908 | 32.072 | N |
| ATOM | 547 | CA  | GLY A | 61 | 37.181 | 68.924 | 32.939 | C |
| ATOM | 548 | C   | GLY A | 61 | 37.063 | 68.382 | 34.369 | C |
| ATOM | 549 | O   | GLY A | 61 | 36.930 | 69.129 | 35.317 | O |
| ATOM | 550 | H   | GLY A | 61 | 37.470 | 67.005 | 32.002 | H |
| ATOM | 551 | N   | CYS A | 62 | 37.119 | 67.087 | 34.529 | N |
| ATOM | 552 | CA  | CYS A | 62 | 37.017 | 66.490 | 35.893 | C |
| ATOM | 553 | C   | CYS A | 62 | 35.853 | 67.104 | 36.680 | C |
| ATOM | 554 | O   | CYS A | 62 | 34.715 | 67.063 | 36.257 | O |
| ATOM | 555 | CB  | CYS A | 62 | 36.756 | 65.007 | 35.643 | C |
| ATOM | 556 | SG  | CYS A | 62 | 37.913 | 64.016 | 36.615 | S |
| ATOM | 557 | H   | CYS A | 62 | 37.233 | 66.502 | 33.751 | H |
| ATOM | 558 | N   | LYS A | 63 | 36.129 | 67.658 | 37.831 | N |
| ATOM | 559 | CA  | LYS A | 63 | 35.038 | 68.258 | 38.656 | C |
| ATOM | 560 | C   | LYS A | 63 | 34.845 | 67.436 | 39.930 | C |
| ATOM | 561 | O   | LYS A | 63 | 35.789 | 66.909 | 40.481 | O |
| ATOM | 562 | CB  | LYS A | 63 | 35.511 | 69.669 | 39.018 | C |
| ATOM | 563 | CG  | LYS A | 63 | 36.244 | 70.299 | 37.834 | C |
| ATOM | 564 | CD  | LYS A | 63 | 35.258 | 70.519 | 36.685 | C |
| ATOM | 565 | CE  | LYS A | 63 | 34.110 | 71.412 | 37.165 | C |
| ATOM | 566 | NZ  | LYS A | 63 | 34.011 | 72.495 | 36.148 | N |
| ATOM | 567 | H   | LYS A | 63 | 37.053 | 67.670 | 38.159 | H |
| ATOM | 568 | HZ1 | LYS A | 63 | 33.012 | 72.738 | 35.994 | H |
| ATOM | 569 | HZ2 | LYS A | 63 | 34.524 | 73.336 | 36.487 | H |
| ATOM | 570 | HZ3 | LYS A | 63 | 34.428 | 72.172 | 35.253 | H |
| ATOM | 571 | N   | ILE A | 64 | 33.640 | 67.322 | 40.409 | N |
| ATOM | 572 | CA  | ILE A | 64 | 33.413 | 66.535 | 41.652 | C |
| ATOM | 573 | C   | ILE A | 64 | 32.144 | 67.014 | 42.362 | C |
| ATOM | 574 | O   | ILE A | 64 | 31.080 | 67.082 | 41.781 | O |

|      |     |     |       |    |        |        |        |   |
|------|-----|-----|-------|----|--------|--------|--------|---|
| ATOM | 575 | CB  | ILE A | 64 | 33.270 | 65.088 | 41.183 | C |
| ATOM | 576 | CG1 | ILE A | 64 | 34.569 | 64.653 | 40.499 | C |
| ATOM | 577 | CG2 | ILE A | 64 | 32.997 | 64.185 | 42.387 | C |
| ATOM | 578 | CD1 | ILE A | 64 | 34.571 | 63.136 | 40.316 | C |
| ATOM | 579 | H   | ILE A | 64 | 32.886 | 67.752 | 39.955 | H |
| ATOM | 580 | N   | SER A | 65 | 32.247 | 67.346 | 43.616 | N |
| ATOM | 581 | CA  | SER A | 65 | 31.045 | 67.817 | 44.359 | C |
| ATOM | 582 | C   | SER A | 65 | 30.999 | 67.162 | 45.740 | C |
| ATOM | 583 | O   | SER A | 65 | 31.719 | 67.537 | 46.643 | O |
| ATOM | 584 | CB  | SER A | 65 | 31.208 | 69.330 | 44.480 | C |
| ATOM | 585 | OG  | SER A | 65 | 30.980 | 69.726 | 45.825 | O |
| ATOM | 586 | H   | SER A | 65 | 33.112 | 67.283 | 44.070 | H |
| ATOM | 587 | HG  | SER A | 65 | 30.595 | 70.605 | 45.815 | H |
| ATOM | 588 | N   | THR A | 66 | 30.160 | 66.180 | 45.902 | N |
| ATOM | 589 | CA  | THR A | 66 | 30.065 | 65.486 | 47.214 | C |
| ATOM | 590 | C   | THR A | 66 | 31.343 | 64.695 | 47.492 | C |
| ATOM | 591 | O   | THR A | 66 | 32.207 | 65.125 | 48.231 | O |
| ATOM | 592 | CB  | THR A | 66 | 29.884 | 66.590 | 48.251 | C |
| ATOM | 593 | OG1 | THR A | 66 | 29.158 | 67.666 | 47.675 | O |
| ATOM | 594 | CG2 | THR A | 66 | 29.112 | 66.027 | 49.444 | C |
| ATOM | 595 | H   | THR A | 66 | 29.595 | 65.892 | 45.154 | H |
| ATOM | 596 | HG1 | THR A | 66 | 29.666 | 68.471 | 47.806 | H |
| ATOM | 597 | N   | CYS A | 67 | 31.465 | 63.536 | 46.912 | N |
| ATOM | 598 | CA  | CYS A | 67 | 32.680 | 62.703 | 47.143 | C |
| ATOM | 599 | C   | CYS A | 67 | 32.274 | 61.241 | 47.301 | C |
| ATOM | 600 | O   | CYS A | 67 | 31.696 | 60.649 | 46.412 | O |
| ATOM | 601 | CB  | CYS A | 67 | 33.541 | 62.874 | 45.890 | C |
| ATOM | 602 | SG  | CYS A | 67 | 35.291 | 62.732 | 46.335 | S |
| ATOM | 603 | H   | CYS A | 67 | 30.749 | 63.206 | 46.328 | H |
| ATOM | 604 | N   | ILE A | 68 | 32.577 | 60.647 | 48.418 | N |
| ATOM | 605 | CA  | ILE A | 68 | 32.213 | 59.218 | 48.608 | C |
| ATOM | 606 | C   | ILE A | 68 | 33.351 | 58.356 | 48.080 | C |
| ATOM | 607 | O   | ILE A | 68 | 34.183 | 57.868 | 48.819 | O |
| ATOM | 608 | CB  | ILE A | 68 | 32.033 | 59.019 | 50.111 | C |
| ATOM | 609 | CG1 | ILE A | 68 | 30.859 | 59.869 | 50.613 | C |
| ATOM | 610 | CG2 | ILE A | 68 | 31.731 | 57.547 | 50.372 | C |

|      |     |     |       |    |        |        |        |   |
|------|-----|-----|-------|----|--------|--------|--------|---|
| ATOM | 611 | CD1 | ILE A | 68 | 31.235 | 61.350 | 50.565 | C |
| ATOM | 612 | H   | ILE A | 68 | 33.054 | 61.133 | 49.119 | H |
| ATOM | 613 | N   | ILE A | 69 | 33.397 | 58.196 | 46.795 | N |
| ATOM | 614 | CA  | ILE A | 69 | 34.482 | 57.396 | 46.172 | C |
| ATOM | 615 | C   | ILE A | 69 | 34.070 | 55.923 | 46.083 | C |
| ATOM | 616 | O   | ILE A | 69 | 32.903 | 55.599 | 46.015 | O |
| ATOM | 617 | CB  | ILE A | 69 | 34.659 | 58.007 | 44.777 | C |
| ATOM | 618 | CG1 | ILE A | 69 | 34.670 | 59.543 | 44.879 | C |
| ATOM | 619 | CG2 | ILE A | 69 | 35.981 | 57.527 | 44.173 | C |
| ATOM | 620 | CD1 | ILE A | 69 | 34.383 | 60.148 | 43.506 | C |
| ATOM | 621 | H   | ILE A | 69 | 32.716 | 58.619 | 46.234 | H |
| ATOM | 622 | N   | THR A | 70 | 35.023 | 55.030 | 46.089 | N |
| ATOM | 623 | CA  | THR A | 70 | 34.683 | 53.577 | 46.015 | C |
| ATOM | 624 | C   | THR A | 70 | 35.809 | 52.800 | 45.327 | C |
| ATOM | 625 | O   | THR A | 70 | 36.818 | 52.488 | 45.929 | O |
| ATOM | 626 | CB  | THR A | 70 | 34.547 | 53.135 | 47.472 | C |
| ATOM | 627 | OG1 | THR A | 70 | 33.325 | 53.633 | 48.005 | O |
| ATOM | 628 | CG2 | THR A | 70 | 34.561 | 51.605 | 47.545 | C |
| ATOM | 629 | H   | THR A | 70 | 35.959 | 55.312 | 46.150 | H |
| ATOM | 630 | HG1 | THR A | 70 | 32.870 | 52.909 | 48.443 | H |
| ATOM | 631 | N   | GLY A | 71 | 35.642 | 52.478 | 44.074 | N |
| ATOM | 632 | CA  | GLY A | 71 | 36.703 | 51.714 | 43.357 | C |
| ATOM | 633 | C   | GLY A | 71 | 37.703 | 52.689 | 42.736 | C |
| ATOM | 634 | O   | GLY A | 71 | 38.881 | 52.406 | 42.639 | O |
| ATOM | 635 | H   | GLY A | 71 | 34.821 | 52.733 | 43.606 | H |
| ATOM | 636 | N   | GLY A | 72 | 37.247 | 53.835 | 42.317 | N |
| ATOM | 637 | CA  | GLY A | 72 | 38.178 | 54.824 | 41.706 | C |
| ATOM | 638 | C   | GLY A | 72 | 38.963 | 55.529 | 42.815 | C |
| ATOM | 639 | O   | GLY A | 72 | 39.972 | 56.159 | 42.571 | O |
| ATOM | 640 | H   | GLY A | 72 | 36.294 | 54.045 | 42.406 | H |
| ATOM | 641 | N   | VAL A | 73 | 38.511 | 55.416 | 44.035 | N |
| ATOM | 642 | CA  | VAL A | 73 | 39.236 | 56.069 | 45.163 | C |
| ATOM | 643 | C   | VAL A | 73 | 38.291 | 56.973 | 45.965 | C |
| ATOM | 644 | O   | VAL A | 73 | 37.227 | 56.548 | 46.369 | O |
| ATOM | 645 | CB  | VAL A | 73 | 39.713 | 54.912 | 46.037 | C |
| ATOM | 646 | CG1 | VAL A | 73 | 40.428 | 53.872 | 45.174 | C |



|      |     |     |       |    |        |        |        |   |
|------|-----|-----|-------|----|--------|--------|--------|---|
| ATOM | 647 | CG2 | VAL A | 73 | 38.503 | 54.266 | 46.716 | C |
| ATOM | 648 | H   | VAL A | 73 | 37.699 | 54.894 | 44.211 | H |
| ATOM | 649 | N   | PRO A | 74 | 38.719 | 58.189 | 46.182 | N |
| ATOM | 650 | CA  | PRO A | 74 | 37.906 | 59.153 | 46.959 | C |
| ATOM | 651 | C   | PRO A | 74 | 37.984 | 58.830 | 48.452 | C |
| ATOM | 652 | O   | PRO A | 74 | 39.009 | 58.414 | 48.953 | O |
| ATOM | 653 | CB  | PRO A | 74 | 38.566 | 60.497 | 46.673 | C |
| ATOM | 654 | CG  | PRO A | 74 | 39.980 | 60.166 | 46.307 | C |
| ATOM | 655 | CD  | PRO A | 74 | 39.984 | 58.773 | 45.726 | C |
| ATOM | 656 | N   | ALA A | 75 | 36.914 | 59.028 | 49.169 | N |
| ATOM | 657 | CA  | ALA A | 75 | 36.938 | 58.741 | 50.631 | C |
| ATOM | 658 | C   | ALA A | 75 | 37.349 | 60.000 | 51.396 | C |
| ATOM | 659 | O   | ALA A | 75 | 37.281 | 61.093 | 50.872 | O |
| ATOM | 660 | CB  | ALA A | 75 | 35.505 | 58.340 | 50.982 | C |
| ATOM | 661 | H   | ALA A | 75 | 36.098 | 59.371 | 48.749 | H |
| ATOM | 662 | N   | PRO A | 76 | 37.761 | 59.805 | 52.617 | N |
| ATOM | 663 | CA  | PRO A | 76 | 38.185 | 60.946 | 53.466 | C |
| ATOM | 664 | C   | PRO A | 76 | 36.976 | 61.812 | 53.826 | C |
| ATOM | 665 | O   | PRO A | 76 | 36.578 | 61.900 | 54.970 | O |
| ATOM | 666 | CB  | PRO A | 76 | 38.775 | 60.273 | 54.704 | C |
| ATOM | 667 | CG  | PRO A | 76 | 38.127 | 58.927 | 54.751 | C |
| ATOM | 668 | CD  | PRO A | 76 | 37.868 | 58.524 | 53.324 | C |
| ATOM | 669 | N   | SER A | 77 | 36.388 | 62.450 | 52.851 | N |
| ATOM | 670 | CA  | SER A | 77 | 35.201 | 63.308 | 53.128 | C |
| ATOM | 671 | C   | SER A | 77 | 35.573 | 64.788 | 52.998 | C |
| ATOM | 672 | O   | SER A | 77 | 36.088 | 65.223 | 51.988 | O |
| ATOM | 673 | CB  | SER A | 77 | 34.178 | 62.919 | 52.061 | C |
| ATOM | 674 | OG  | SER A | 77 | 32.902 | 62.763 | 52.668 | O |
| ATOM | 675 | H   | SER A | 77 | 36.725 | 62.361 | 51.935 | H |
| ATOM | 676 | HG  | SER A | 77 | 32.760 | 63.510 | 53.255 | H |
| ATOM | 677 | N   | ALA A | 78 | 35.311 | 65.564 | 54.014 | N |
| ATOM | 678 | CA  | ALA A | 78 | 35.646 | 67.016 | 53.951 | C |
| ATOM | 679 | C   | ALA A | 78 | 34.694 | 67.740 | 52.995 | C |
| ATOM | 680 | O   | ALA A | 78 | 34.806 | 68.929 | 52.775 | O |
| ATOM | 681 | CB  | ALA A | 78 | 35.462 | 67.526 | 55.380 | C |
| ATOM | 682 | H   | ALA A | 78 | 34.894 | 65.191 | 54.819 | H |

|      |     |     |       |    |        |        |        |   |
|------|-----|-----|-------|----|--------|--------|--------|---|
| ATOM | 683 | N   | ALAA  | 79 | 33.749 | 67.035 | 52.431 | N |
| ATOM | 684 | CA  | ALAA  | 79 | 32.790 | 67.691 | 51.496 | C |
| ATOM | 685 | C   | ALAA  | 79 | 33.268 | 67.546 | 50.048 | C |
| ATOM | 686 | O   | ALAA  | 79 | 32.918 | 68.330 | 49.189 | O |
| ATOM | 687 | CB  | ALAA  | 79 | 31.470 | 66.948 | 51.700 | C |
| ATOM | 688 | H   | ALAA  | 79 | 33.668 | 66.078 | 52.623 | H |
| ATOM | 689 | N   | CYS A | 80 | 34.071 | 66.555 | 49.770 | N |
| ATOM | 690 | CA  | CYS A | 80 | 34.571 | 66.377 | 48.377 | C |
| ATOM | 691 | C   | CYS A | 80 | 35.611 | 67.460 | 48.064 | C |
| ATOM | 692 | O   | CYS A | 80 | 36.064 | 68.164 | 48.946 | O |
| ATOM | 693 | CB  | CYS A | 80 | 35.192 | 64.979 | 48.355 | C |
| ATOM | 694 | SG  | CYS A | 80 | 35.865 | 64.633 | 46.711 | S |
| ATOM | 695 | H   | CYS A | 80 | 34.348 | 65.933 | 50.475 | H |
| ATOM | 696 | N   | LYS A | 81 | 35.977 | 67.620 | 46.820 | N |
| ATOM | 697 | CA  | LYS A | 81 | 36.965 | 68.688 | 46.475 | C |
| ATOM | 698 | C   | LYS A | 81 | 38.328 | 68.098 | 46.088 | C |
| ATOM | 699 | O   | LYS A | 81 | 39.361 | 68.621 | 46.456 | O |
| ATOM | 700 | CB  | LYS A | 81 | 36.313 | 69.466 | 45.309 | C |
| ATOM | 701 | CG  | LYS A | 81 | 36.896 | 69.057 | 43.941 | C |
| ATOM | 702 | CD  | LYS A | 81 | 36.228 | 67.769 | 43.449 | C |
| ATOM | 703 | CE  | LYS A | 81 | 37.226 | 66.954 | 42.613 | C |
| ATOM | 704 | NZ  | LYS A | 81 | 37.700 | 67.894 | 41.558 | N |
| ATOM | 705 | H   | LYS A | 81 | 35.588 | 67.060 | 46.117 | H |
| ATOM | 706 | HZ1 | LYS A | 81 | 36.891 | 68.209 | 40.987 | H |
| ATOM | 707 | HZ2 | LYS A | 81 | 38.151 | 68.719 | 42.006 | H |
| ATOM | 708 | HZ3 | LYS A | 81 | 38.387 | 67.412 | 40.945 | H |
| ATOM | 709 | N   | ILE A | 82 | 38.348 | 67.033 | 45.335 | N |
| ATOM | 710 | CA  | ILE A | 82 | 39.656 | 66.449 | 44.921 | C |
| ATOM | 711 | C   | ILE A | 82 | 40.580 | 67.561 | 44.411 | C |
| ATOM | 712 | O   | ILE A | 82 | 41.505 | 67.966 | 45.086 | O |
| ATOM | 713 | CB  | ILE A | 82 | 40.234 | 65.817 | 46.188 | C |
| ATOM | 714 | CG1 | ILE A | 82 | 39.210 | 64.853 | 46.792 | C |
| ATOM | 715 | CG2 | ILE A | 82 | 41.510 | 65.051 | 45.837 | C |
| ATOM | 716 | CD1 | ILE A | 82 | 38.746 | 63.864 | 45.723 | C |
| ATOM | 717 | H   | ILE A | 82 | 37.511 | 66.629 | 45.033 | H |
| ATOM | 718 | N   | SER A | 83 | 40.334 | 68.069 | 43.230 | N |

|      |     |     |       |    |        |        |        |   |
|------|-----|-----|-------|----|--------|--------|--------|---|
| ATOM | 719 | CA  | SER A | 83 | 41.202 | 69.163 | 42.704 | C |
| ATOM | 720 | C   | SER A | 83 | 41.728 | 68.820 | 41.305 | C |
| ATOM | 721 | O   | SER A | 83 | 42.850 | 68.383 | 41.144 | O |
| ATOM | 722 | CB  | SER A | 83 | 40.296 | 70.392 | 42.642 | C |
| ATOM | 723 | OG  | SER A | 83 | 40.701 | 71.325 | 43.635 | O |
| ATOM | 724 | H   | SER A | 83 | 39.579 | 67.740 | 42.695 | H |
| ATOM | 725 | HG  | SER A | 83 | 40.925 | 72.149 | 43.194 | H |
| ATOM | 726 | N   | GLY A | 84 | 40.931 | 69.029 | 40.293 | N |
| ATOM | 727 | CA  | GLY A | 84 | 41.395 | 68.728 | 38.908 | C |
| ATOM | 728 | C   | GLY A | 84 | 40.682 | 67.485 | 38.373 | C |
| ATOM | 729 | O   | GLY A | 84 | 40.340 | 67.410 | 37.208 | O |
| ATOM | 730 | H   | GLY A | 84 | 40.033 | 69.391 | 40.441 | H |
| ATOM | 731 | N   | CYS A | 85 | 40.459 | 66.504 | 39.205 | N |
| ATOM | 732 | CA  | CYS A | 85 | 39.773 | 65.271 | 38.723 | C |
| ATOM | 733 | C   | CYS A | 85 | 40.545 | 64.030 | 39.189 | C |
| ATOM | 734 | O   | CYS A | 85 | 41.549 | 64.133 | 39.865 | O |
| ATOM | 735 | CB  | CYS A | 85 | 38.375 | 65.323 | 39.352 | C |
| ATOM | 736 | SG  | CYS A | 85 | 37.239 | 64.173 | 38.517 | S |
| ATOM | 737 | H   | CYS A | 85 | 40.745 | 66.577 | 40.138 | H |
| ATOM | 738 | N   | THR A | 86 | 40.090 | 62.863 | 38.827 | N |
| ATOM | 739 | CA  | THR A | 86 | 40.796 | 61.620 | 39.239 | C |
| ATOM | 740 | C   | THR A | 86 | 39.980 | 60.401 | 38.817 | C |
| ATOM | 741 | O   | THR A | 86 | 39.202 | 60.457 | 37.886 | O |
| ATOM | 742 | CB  | THR A | 86 | 42.123 | 61.650 | 38.487 | C |
| ATOM | 743 | OG1 | THR A | 86 | 42.740 | 60.373 | 38.568 | O |
| ATOM | 744 | CG2 | THR A | 86 | 41.873 | 62.010 | 37.020 | C |
| ATOM | 745 | H   | THR A | 86 | 39.287 | 62.800 | 38.277 | H |
| ATOM | 746 | HG1 | THR A | 86 | 43.444 | 60.423 | 39.217 | H |
| ATOM | 747 | N   | PHE A | 87 | 40.151 | 59.300 | 39.490 | N |
| ATOM | 748 | CA  | PHE A | 87 | 39.377 | 58.081 | 39.112 | C |
| ATOM | 749 | C   | PHE A | 87 | 40.333 | 56.915 | 38.863 | C |
| ATOM | 750 | O   | PHE A | 87 | 41.452 | 56.903 | 39.337 | O |
| ATOM | 751 | CB  | PHE A | 87 | 38.449 | 57.751 | 40.296 | C |
| ATOM | 752 | CG  | PHE A | 87 | 38.232 | 58.957 | 41.186 | C |
| ATOM | 753 | CD1 | PHE A | 87 | 37.868 | 60.193 | 40.635 | C |
| ATOM | 754 | CD2 | PHE A | 87 | 38.391 | 58.826 | 42.568 | C |

|      |     |     |     |   |    |        |        |        |   |
|------|-----|-----|-----|---|----|--------|--------|--------|---|
| ATOM | 755 | CE1 | PHE | A | 87 | 37.664 | 61.300 | 41.473 | C |
| ATOM | 756 | CE2 | PHE | A | 87 | 38.189 | 59.929 | 43.402 | C |
| ATOM | 757 | CZ  | PHE | A | 87 | 37.826 | 61.165 | 42.856 | C |
| ATOM | 758 | H   | PHE | A | 87 | 40.785 | 59.273 | 40.237 | H |
| ATOM | 759 | N   | SER | A | 88 | 39.898 | 55.933 | 38.127 | N |
| ATOM | 760 | CA  | SER | A | 88 | 40.776 | 54.762 | 37.848 | C |
| ATOM | 761 | C   | SER | A | 88 | 39.946 | 53.478 | 37.873 | C |
| ATOM | 762 | O   | SER | A | 88 | 40.313 | 52.478 | 37.291 | O |
| ATOM | 763 | CB  | SER | A | 88 | 41.340 | 55.010 | 36.450 | C |
| ATOM | 764 | OG  | SER | A | 88 | 42.298 | 54.004 | 36.147 | O |
| ATOM | 765 | H   | SER | A | 88 | 38.991 | 55.963 | 37.757 | H |
| ATOM | 766 | HG  | SER | A | 88 | 41.848 | 53.299 | 35.675 | H |
| ATOM | 767 | N   | ALA | A | 89 | 38.826 | 53.503 | 38.543 | N |
| ATOM | 768 | CA  | ALA | A | 89 | 37.969 | 52.286 | 38.601 | C |
| ATOM | 769 | C   | ALA | A | 89 | 37.628 | 51.822 | 37.184 | C |
| ATOM | 770 | O   | ALA | A | 89 | 38.238 | 50.915 | 36.652 | O |
| ATOM | 771 | CB  | ALA | A | 89 | 38.818 | 51.242 | 39.326 | C |
| ATOM | 772 | H   | ALA | A | 89 | 38.546 | 54.321 | 39.003 | H |
| ATOM | 773 | N   | ASN | A | 90 | 36.664 | 52.447 | 36.564 | N |
| ATOM | 774 | CA  | ASN | A | 90 | 36.287 | 52.053 | 35.177 | C |
| ATOM | 775 | C   | ASN | A | 90 | 35.661 | 50.653 | 35.171 | C |
| ATOM | 776 | O   | ASN | A | 90 | 35.130 | 50.266 | 34.143 | O |
| ATOM | 777 | CB  | ASN | A | 90 | 35.273 | 53.117 | 34.732 | C |
| ATOM | 778 | CG  | ASN | A | 90 | 33.875 | 52.763 | 35.244 | C |
| ATOM | 779 | OD1 | ASN | A | 90 | 32.907 | 52.860 | 34.517 | O |
| ATOM | 780 | ND2 | ASN | A | 90 | 33.727 | 52.354 | 36.475 | N |
| ATOM | 781 | OXT | ASN | A | 90 | 35.724 | 49.992 | 36.195 | O |
| ATOM | 782 | H   | ASN | A | 90 | 36.191 | 53.180 | 37.011 | H |
| ATOM | 783 | HD2 | ASN | A | 90 | 34.509 | 52.276 | 37.061 | H |
| ATOM | 784 | HD2 | ASN | A | 90 | 32.836 | 52.125 | 36.812 | H |
| TER  | 785 |     | ASP | A | 1  |        |        |        |   |

ENDMOL

Water molecules

|      |   |    |     |   |   |        |        |        |   |
|------|---|----|-----|---|---|--------|--------|--------|---|
| ATOM | 1 | O  | HOH | A | 1 | 22.063 | 46.896 | 21.761 | O |
| ATOM | 2 | H1 | HOH | A | 2 | 22.877 | 46.447 | 21.451 | H |

|      |    |    |       |   |        |        |        |   |
|------|----|----|-------|---|--------|--------|--------|---|
| ATOM | 3  | H2 | HOH A | 3 | 22.072 | 46.896 | 22.741 | H |
| ATOM | 4  | O  | HOH A | 1 | 22.063 | 46.873 | 43.871 | O |
| ATOM | 5  | H1 | HOH A | 2 | 22.873 | 46.417 | 43.561 | H |
| ATOM | 6  | H2 | HOH A | 3 | 22.076 | 46.883 | 44.850 | H |
| ATOM | 7  | O  | HOH A | 1 | 22.067 | 46.995 | 65.964 | O |
| ATOM | 8  | H1 | HOH A | 2 | 22.882 | 46.549 | 65.652 | H |
| ATOM | 9  | H2 | HOH A | 3 | 22.078 | 46.993 | 66.944 | H |
| ATOM | 10 | O  | HOH A | 1 | 44.699 | 46.940 | 21.683 | O |
| ATOM | 11 | H1 | HOH A | 2 | 45.511 | 46.487 | 21.374 | H |
| ATOM | 12 | H2 | HOH A | 3 | 44.703 | 46.934 | 22.663 | H |
| ATOM | 13 | O  | HOH A | 1 | 44.699 | 46.884 | 43.798 | O |
| ATOM | 14 | H1 | HOH A | 2 | 45.516 | 46.441 | 43.489 | H |
| ATOM | 15 | H2 | HOH A | 3 | 44.711 | 46.891 | 44.778 | H |
| ATOM | 16 | O  | HOH A | 1 | 44.671 | 47.090 | 65.925 | O |
| ATOM | 17 | H1 | HOH A | 2 | 45.479 | 46.634 | 65.610 | H |
| ATOM | 18 | H2 | HOH A | 3 | 44.682 | 47.085 | 66.905 | H |
| ATOM | 19 | O  | HOH A | 1 | 67.279 | 46.875 | 21.703 | O |
| ATOM | 20 | H1 | HOH A | 2 | 68.091 | 46.421 | 21.396 | H |
| ATOM | 21 | H2 | HOH A | 3 | 67.282 | 46.870 | 22.683 | H |
| ATOM | 22 | O  | HOH A | 1 | 67.259 | 46.911 | 43.861 | O |
| ATOM | 23 | H1 | HOH A | 2 | 68.073 | 46.457 | 43.555 | H |
| ATOM | 24 | H2 | HOH A | 3 | 67.265 | 46.914 | 44.841 | H |
| ATOM | 25 | O  | HOH A | 1 | 67.278 | 46.913 | 65.957 | O |
| ATOM | 26 | H1 | HOH A | 2 | 68.096 | 46.467 | 65.652 | H |
| ATOM | 27 | H2 | HOH A | 3 | 67.276 | 46.904 | 66.937 | H |
| ATOM | 28 | O  | HOH A | 1 | 4.010  | 46.899 | 21.734 | O |
| ATOM | 29 | H1 | HOH A | 2 | 3.217  | 46.425 | 21.408 | H |
| ATOM | 30 | H2 | HOH A | 3 | 3.983  | 46.897 | 22.713 | H |
| ATOM | 31 | O  | HOH A | 1 | 3.980  | 46.924 | 43.894 | O |
| ATOM | 32 | H1 | HOH A | 2 | 3.189  | 46.449 | 43.563 | H |
| ATOM | 33 | H2 | HOH A | 3 | 3.946  | 46.922 | 44.874 | H |
| ATOM | 34 | O  | HOH A | 1 | 4.013  | 46.925 | 66.005 | O |
| ATOM | 35 | H1 | HOH A | 2 | 3.218  | 46.454 | 65.679 | H |
| ATOM | 36 | H2 | HOH A | 3 | 3.983  | 46.927 | 66.985 | H |
| ATOM | 37 | O  | HOH A | 1 | 26.589 | 46.953 | 21.791 | O |
| ATOM | 38 | H1 | HOH A | 2 | 25.798 | 46.471 | 21.470 | H |

|      |    |    |       |   |        |        |        |   |
|------|----|----|-------|---|--------|--------|--------|---|
| ATOM | 39 | H2 | HOH A | 3 | 26.566 | 46.954 | 22.771 | H |
| ATOM | 40 | O  | HOH A | 1 | 26.606 | 46.895 | 43.867 | O |
| ATOM | 41 | H1 | HOH A | 2 | 25.808 | 46.427 | 43.544 | H |
| ATOM | 42 | H2 | HOH A | 3 | 26.582 | 46.894 | 44.847 | H |
| ATOM | 43 | O  | HOH A | 1 | 26.596 | 47.067 | 65.987 | O |
| ATOM | 44 | H1 | HOH A | 2 | 25.805 | 46.588 | 65.662 | H |
| ATOM | 45 | H2 | HOH A | 3 | 26.574 | 47.059 | 66.966 | H |
| ATOM | 46 | O  | HOH A | 1 | 49.234 | 46.964 | 21.691 | O |
| ATOM | 47 | H1 | HOH A | 2 | 48.433 | 46.502 | 21.364 | H |
| ATOM | 48 | H2 | HOH A | 3 | 49.208 | 46.958 | 22.670 | H |
| ATOM | 49 | O  | HOH A | 1 | 49.225 | 46.928 | 43.827 | O |
| ATOM | 50 | H1 | HOH A | 2 | 48.435 | 46.452 | 43.495 | H |
| ATOM | 51 | H2 | HOH A | 3 | 49.190 | 46.926 | 44.807 | H |
| ATOM | 52 | O  | HOH A | 1 | 49.190 | 47.096 | 65.939 | O |
| ATOM | 53 | H1 | HOH A | 2 | 48.392 | 46.631 | 65.613 | H |
| ATOM | 54 | H2 | HOH A | 3 | 49.166 | 47.089 | 66.919 | H |
| ATOM | 55 | O  | HOH A | 1 | 8.508  | 46.852 | 21.781 | O |
| ATOM | 56 | H1 | HOH A | 2 | 7.704  | 46.397 | 21.453 | H |
| ATOM | 57 | H2 | HOH A | 3 | 8.479  | 46.849 | 22.761 | H |
| ATOM | 58 | O  | HOH A | 1 | 8.475  | 46.913 | 43.935 | O |
| ATOM | 59 | H1 | HOH A | 2 | 7.677  | 46.450 | 43.605 | H |
| ATOM | 60 | H2 | HOH A | 3 | 8.443  | 46.912 | 44.914 | H |
| ATOM | 61 | O  | HOH A | 1 | 8.509  | 46.916 | 66.036 | O |
| ATOM | 62 | H1 | HOH A | 2 | 7.711  | 46.455 | 65.704 | H |
| ATOM | 63 | H2 | HOH A | 3 | 8.481  | 46.902 | 67.015 | H |
| ATOM | 64 | O  | HOH A | 1 | 31.112 | 46.963 | 21.800 | O |
| ATOM | 65 | H1 | HOH A | 2 | 30.304 | 46.510 | 21.482 | H |
| ATOM | 66 | H2 | HOH A | 3 | 31.097 | 46.957 | 22.780 | H |
| ATOM | 67 | O  | HOH A | 1 | 31.110 | 46.886 | 43.880 | O |
| ATOM | 68 | H1 | HOH A | 2 | 30.306 | 46.422 | 43.566 | H |
| ATOM | 69 | H2 | HOH A | 3 | 31.091 | 46.894 | 44.860 | H |
| ATOM | 70 | O  | HOH A | 1 | 31.099 | 47.091 | 66.004 | O |
| ATOM | 71 | H1 | HOH A | 2 | 30.297 | 46.632 | 65.679 | H |
| ATOM | 72 | H2 | HOH A | 3 | 31.074 | 47.090 | 66.983 | H |
| ATOM | 73 | O  | HOH A | 1 | 53.729 | 46.916 | 21.714 | O |
| ATOM | 74 | H1 | HOH A | 2 | 52.924 | 46.462 | 21.387 | H |

|      |     |    |       |   |        |        |        |   |
|------|-----|----|-------|---|--------|--------|--------|---|
| ATOM | 75  | H2 | HOH A | 3 | 53.705 | 46.905 | 22.694 | H |
| ATOM | 76  | O  | HOH A | 1 | 53.716 | 46.929 | 43.860 | O |
| ATOM | 77  | H1 | HOH A | 2 | 52.918 | 46.461 | 43.535 | H |
| ATOM | 78  | H2 | HOH A | 3 | 53.687 | 46.930 | 44.840 | H |
| ATOM | 79  | O  | HOH A | 1 | 53.687 | 47.031 | 65.967 | O |
| ATOM | 80  | H1 | HOH A | 2 | 52.883 | 46.573 | 65.646 | H |
| ATOM | 81  | H2 | HOH A | 3 | 53.669 | 47.023 | 66.947 | H |
| ATOM | 82  | O  | HOH A | 1 | 13.022 | 46.925 | 21.776 | O |
| ATOM | 83  | H1 | HOH A | 2 | 13.814 | 46.453 | 21.443 | H |
| ATOM | 84  | H2 | HOH A | 3 | 12.228 | 46.454 | 21.447 | H |
| ATOM | 85  | O  | HOH A | 1 | 12.992 | 46.931 | 43.902 | O |
| ATOM | 86  | H1 | HOH A | 2 | 13.782 | 46.455 | 43.569 | H |
| ATOM | 87  | H2 | HOH A | 3 | 12.196 | 46.460 | 43.578 | H |
| ATOM | 88  | O  | HOH A | 1 | 13.022 | 46.978 | 65.999 | O |
| ATOM | 89  | H1 | HOH A | 2 | 13.817 | 46.516 | 65.660 | H |
| ATOM | 90  | H2 | HOH A | 3 | 12.232 | 46.498 | 65.674 | H |
| ATOM | 91  | O  | HOH A | 1 | 35.620 | 47.000 | 21.747 | O |
| ATOM | 92  | H1 | HOH A | 2 | 36.412 | 46.532 | 21.408 | H |
| ATOM | 93  | H2 | HOH A | 3 | 34.826 | 46.525 | 21.425 | H |
| ATOM | 94  | O  | HOH A | 1 | 35.627 | 46.925 | 43.840 | O |
| ATOM | 95  | H1 | HOH A | 2 | 36.427 | 46.465 | 43.509 | H |
| ATOM | 96  | H2 | HOH A | 3 | 34.841 | 46.439 | 43.512 | H |
| ATOM | 97  | O  | HOH A | 1 | 35.617 | 47.160 | 65.976 | O |
| ATOM | 98  | H1 | HOH A | 2 | 36.407 | 46.685 | 65.646 | H |
| ATOM | 99  | H2 | HOH A | 3 | 34.822 | 46.689 | 65.650 | H |
| ATOM | 100 | O  | HOH A | 1 | 58.235 | 46.958 | 21.689 | O |
| ATOM | 101 | H1 | HOH A | 2 | 59.023 | 46.480 | 21.356 | H |
| ATOM | 102 | H2 | HOH A | 3 | 57.437 | 46.489 | 21.365 | H |
| ATOM | 103 | O  | HOH A | 1 | 58.228 | 46.962 | 43.850 | O |
| ATOM | 104 | H1 | HOH A | 2 | 59.025 | 46.495 | 43.521 | H |
| ATOM | 105 | H2 | HOH A | 3 | 57.439 | 46.482 | 43.520 | H |
| ATOM | 106 | O  | HOH A | 1 | 58.204 | 47.036 | 65.959 | O |
| ATOM | 107 | H1 | HOH A | 2 | 58.991 | 46.558 | 65.624 | H |
| ATOM | 108 | H2 | HOH A | 3 | 57.406 | 46.570 | 65.632 | H |
| ATOM | 109 | O  | HOH A | 1 | 17.551 | 46.893 | 21.763 | O |
| ATOM | 110 | H1 | HOH A | 2 | 18.357 | 46.435 | 21.446 | H |

|      |     |    |       |   |        |        |        |   |
|------|-----|----|-------|---|--------|--------|--------|---|
| ATOM | 111 | H2 | HOH A | 3 | 17.576 | 47.815 | 21.431 | H |
| ATOM | 112 | O  | HOH A | 1 | 17.547 | 46.886 | 43.897 | O |
| ATOM | 113 | H1 | HOH A | 2 | 18.350 | 46.429 | 43.571 | H |
| ATOM | 114 | H2 | HOH A | 3 | 17.564 | 47.806 | 43.559 | H |
| ATOM | 115 | O  | HOH A | 1 | 17.569 | 46.964 | 65.980 | O |
| ATOM | 116 | H1 | HOH A | 2 | 18.371 | 46.507 | 65.651 | H |
| ATOM | 117 | H2 | HOH A | 3 | 17.587 | 47.885 | 65.647 | H |
| ATOM | 118 | O  | HOH A | 1 | 40.184 | 46.972 | 21.715 | O |
| ATOM | 119 | H1 | HOH A | 2 | 40.983 | 46.514 | 21.382 | H |
| ATOM | 120 | H2 | HOH A | 3 | 40.204 | 47.895 | 21.386 | H |
| ATOM | 121 | O  | HOH A | 1 | 40.191 | 46.896 | 43.823 | O |
| ATOM | 122 | H1 | HOH A | 2 | 40.998 | 46.448 | 43.492 | H |
| ATOM | 123 | H2 | HOH A | 3 | 40.198 | 47.818 | 43.491 | H |
| ATOM | 124 | O  | HOH A | 1 | 40.168 | 47.115 | 65.943 | O |
| ATOM | 125 | H1 | HOH A | 2 | 40.966 | 46.653 | 65.612 | H |
| ATOM | 126 | H2 | HOH A | 3 | 40.189 | 48.035 | 65.607 | H |
| ATOM | 127 | O  | HOH A | 1 | 62.777 | 46.882 | 21.695 | O |
| ATOM | 128 | H1 | HOH A | 2 | 63.580 | 46.428 | 21.363 | H |
| ATOM | 129 | H2 | HOH A | 3 | 62.787 | 47.801 | 21.354 | H |
| ATOM | 130 | O  | HOH A | 1 | 62.762 | 46.921 | 43.856 | O |
| ATOM | 131 | H1 | HOH A | 2 | 63.562 | 46.466 | 43.520 | H |
| ATOM | 132 | H2 | HOH A | 3 | 62.772 | 47.841 | 43.517 | H |
| ATOM | 133 | O  | HOH A | 1 | 62.766 | 46.958 | 65.969 | O |
| ATOM | 134 | H1 | HOH A | 2 | 63.566 | 46.498 | 65.639 | H |
| ATOM | 135 | H2 | HOH A | 3 | 62.788 | 47.880 | 65.638 | H |
| ATOM | 136 | O  | HOH A | 1 | 1.730  | 27.360 | 21.726 | O |
| ATOM | 137 | H1 | HOH A | 2 | 2.530  | 26.885 | 21.420 | H |
| ATOM | 138 | H2 | HOH A | 3 | 1.732  | 27.356 | 22.706 | H |
| ATOM | 139 | O  | HOH A | 1 | 1.696  | 27.389 | 43.883 | O |
| ATOM | 140 | H1 | HOH A | 2 | 2.497  | 26.915 | 43.576 | H |
| ATOM | 141 | H2 | HOH A | 3 | 1.699  | 27.387 | 44.863 | H |
| ATOM | 142 | O  | HOH A | 1 | 1.732  | 27.397 | 65.970 | O |
| ATOM | 143 | H1 | HOH A | 2 | 2.534  | 26.924 | 65.664 | H |
| ATOM | 144 | H2 | HOH A | 3 | 1.726  | 27.381 | 66.950 | H |
| ATOM | 145 | O  | HOH A | 1 | 24.315 | 27.395 | 21.773 | O |
| ATOM | 146 | H1 | HOH A | 2 | 25.121 | 26.929 | 21.469 | H |



|      |     |    |       |   |        |        |        |   |
|------|-----|----|-------|---|--------|--------|--------|---|
| ATOM | 147 | H2 | HOH A | 3 | 24.314 | 27.391 | 22.753 | H |
| ATOM | 148 | O  | HOH A | 1 | 24.315 | 27.372 | 43.876 | O |
| ATOM | 149 | H1 | HOH A | 2 | 25.120 | 26.903 | 43.571 | H |
| ATOM | 150 | H2 | HOH A | 3 | 24.315 | 27.367 | 44.856 | H |
| ATOM | 151 | O  | HOH A | 1 | 24.324 | 27.510 | 65.980 | O |
| ATOM | 152 | H1 | HOH A | 2 | 25.128 | 27.042 | 65.673 | H |
| ATOM | 153 | H2 | HOH A | 3 | 24.323 | 27.499 | 66.960 | H |
| ATOM | 154 | O  | HOH A | 1 | 46.954 | 27.424 | 21.674 | O |
| ATOM | 155 | H1 | HOH A | 2 | 47.755 | 26.953 | 21.364 | H |
| ATOM | 156 | H2 | HOH A | 3 | 46.957 | 27.413 | 22.654 | H |
| ATOM | 157 | O  | HOH A | 1 | 46.954 | 27.388 | 43.810 | O |
| ATOM | 158 | H1 | HOH A | 2 | 47.762 | 26.920 | 43.514 | H |
| ATOM | 159 | H2 | HOH A | 3 | 46.949 | 27.393 | 44.790 | H |
| ATOM | 160 | O  | HOH A | 1 | 46.912 | 27.574 | 65.926 | O |
| ATOM | 161 | H1 | HOH A | 2 | 47.710 | 27.099 | 65.614 | H |
| ATOM | 162 | H2 | HOH A | 3 | 46.918 | 27.565 | 66.906 | H |
| ATOM | 163 | O  | HOH A | 1 | 6.269  | 27.321 | 21.764 | O |
| ATOM | 164 | H1 | HOH A | 2 | 7.061  | 26.849 | 21.432 | H |
| ATOM | 165 | H2 | HOH A | 3 | 5.475  | 26.865 | 21.415 | H |
| ATOM | 166 | O  | HOH A | 1 | 6.225  | 27.363 | 43.926 | O |
| ATOM | 167 | H1 | HOH A | 2 | 7.017  | 26.886 | 43.600 | H |
| ATOM | 168 | H2 | HOH A | 3 | 5.431  | 26.901 | 43.584 | H |
| ATOM | 169 | O  | HOH A | 1 | 6.256  | 27.359 | 66.030 | O |
| ATOM | 170 | H1 | HOH A | 2 | 7.049  | 26.887 | 65.697 | H |
| ATOM | 171 | H2 | HOH A | 3 | 5.463  | 26.894 | 65.690 | H |
| ATOM | 172 | O  | HOH A | 1 | 28.850 | 27.400 | 21.811 | O |
| ATOM | 173 | H1 | HOH A | 2 | 29.647 | 26.938 | 21.476 | H |
| ATOM | 174 | H2 | HOH A | 3 | 28.061 | 26.933 | 21.464 | H |
| ATOM | 175 | O  | HOH A | 1 | 28.854 | 27.343 | 43.903 | O |
| ATOM | 176 | H1 | HOH A | 2 | 29.649 | 26.874 | 43.574 | H |
| ATOM | 177 | H2 | HOH A | 3 | 28.063 | 26.881 | 43.554 | H |
| ATOM | 178 | O  | HOH A | 1 | 28.850 | 27.528 | 66.005 | O |
| ATOM | 179 | H1 | HOH A | 2 | 29.648 | 27.060 | 65.681 | H |
| ATOM | 180 | H2 | HOH A | 3 | 28.063 | 27.060 | 65.657 | H |
| ATOM | 181 | O  | HOH A | 1 | 51.479 | 27.389 | 21.719 | O |
| ATOM | 182 | H1 | HOH A | 2 | 52.270 | 26.912 | 21.391 | H |

|      |     |    |       |   |        |        |        |   |
|------|-----|----|-------|---|--------|--------|--------|---|
| ATOM | 183 | H2 | HOH A | 3 | 50.685 | 26.934 | 21.370 | H |
| ATOM | 184 | O  | HOH A | 1 | 51.482 | 27.382 | 43.860 | O |
| ATOM | 185 | H1 | HOH A | 2 | 52.275 | 26.908 | 43.533 | H |
| ATOM | 186 | H2 | HOH A | 3 | 50.689 | 26.916 | 43.522 | H |
| ATOM | 187 | O  | HOH A | 1 | 51.444 | 27.505 | 65.969 | O |
| ATOM | 188 | H1 | HOH A | 2 | 52.232 | 27.024 | 65.639 | H |
| ATOM | 189 | H2 | HOH A | 3 | 50.647 | 27.051 | 65.626 | H |
| ATOM | 190 | O  | HOH A | 1 | 10.770 | 27.323 | 21.754 | O |
| ATOM | 191 | H1 | HOH A | 2 | 11.582 | 26.871 | 21.442 | H |
| ATOM | 192 | H2 | HOH A | 3 | 10.770 | 27.302 | 22.734 | H |
| ATOM | 193 | O  | HOH A | 1 | 10.742 | 27.357 | 43.897 | O |
| ATOM | 194 | H1 | HOH A | 2 | 11.544 | 26.896 | 43.574 | H |
| ATOM | 195 | H2 | HOH A | 3 | 10.755 | 27.336 | 44.877 | H |
| ATOM | 196 | O  | HOH A | 1 | 10.786 | 27.366 | 65.987 | O |
| ATOM | 197 | H1 | HOH A | 2 | 11.592 | 26.912 | 65.664 | H |
| ATOM | 198 | H2 | HOH A | 3 | 10.801 | 27.349 | 66.967 | H |
| ATOM | 199 | O  | HOH A | 1 | 33.394 | 27.420 | 21.748 | O |
| ATOM | 200 | H1 | HOH A | 2 | 34.198 | 26.967 | 21.418 | H |
| ATOM | 201 | H2 | HOH A | 3 | 33.410 | 27.389 | 22.727 | H |
| ATOM | 202 | O  | HOH A | 1 | 33.391 | 27.328 | 43.846 | O |
| ATOM | 203 | H1 | HOH A | 2 | 34.197 | 26.871 | 43.527 | H |
| ATOM | 204 | H2 | HOH A | 3 | 33.404 | 27.316 | 44.826 | H |
| ATOM | 205 | O  | HOH A | 1 | 33.367 | 27.557 | 65.968 | O |
| ATOM | 206 | H1 | HOH A | 2 | 34.172 | 27.100 | 65.645 | H |
| ATOM | 207 | H2 | HOH A | 3 | 33.380 | 27.537 | 66.947 | H |
| ATOM | 208 | O  | HOH A | 1 | 55.992 | 27.374 | 21.674 | O |
| ATOM | 209 | H1 | HOH A | 2 | 56.795 | 26.914 | 21.352 | H |
| ATOM | 210 | H2 | HOH A | 3 | 56.004 | 27.356 | 22.654 | H |
| ATOM | 211 | O  | HOH A | 1 | 55.974 | 27.374 | 43.833 | O |
| ATOM | 212 | H1 | HOH A | 2 | 56.781 | 26.917 | 43.518 | H |
| ATOM | 213 | H2 | HOH A | 3 | 55.981 | 27.360 | 44.813 | H |
| ATOM | 214 | O  | HOH A | 1 | 55.964 | 27.454 | 65.946 | O |
| ATOM | 215 | H1 | HOH A | 2 | 56.770 | 26.991 | 65.636 | H |
| ATOM | 216 | H2 | HOH A | 3 | 55.963 | 27.438 | 66.926 | H |
| ATOM | 217 | O  | HOH A | 1 | 15.304 | 27.328 | 21.742 | O |
| ATOM | 218 | H1 | HOH A | 2 | 16.110 | 26.868 | 21.427 | H |

|      |     |    |       |   |        |        |        |   |
|------|-----|----|-------|---|--------|--------|--------|---|
| ATOM | 219 | H2 | HOH A | 3 | 15.306 | 27.308 | 22.721 | H |
| ATOM | 220 | O  | HOH A | 1 | 15.271 | 27.346 | 43.858 | O |
| ATOM | 221 | H1 | HOH A | 2 | 16.075 | 26.879 | 43.548 | H |
| ATOM | 222 | H2 | HOH A | 3 | 15.276 | 27.339 | 44.838 | H |
| ATOM | 223 | O  | HOH A | 1 | 15.309 | 27.389 | 65.944 | O |
| ATOM | 224 | H1 | HOH A | 2 | 16.119 | 26.936 | 65.631 | H |
| ATOM | 225 | H2 | HOH A | 3 | 15.316 | 27.381 | 66.924 | H |
| ATOM | 226 | O  | HOH A | 1 | 37.920 | 27.410 | 21.693 | O |
| ATOM | 227 | H1 | HOH A | 2 | 38.724 | 26.953 | 21.369 | H |
| ATOM | 228 | H2 | HOH A | 3 | 37.928 | 27.381 | 22.672 | H |
| ATOM | 229 | O  | HOH A | 1 | 37.924 | 27.338 | 43.793 | O |
| ATOM | 230 | H1 | HOH A | 2 | 38.729 | 26.875 | 43.482 | H |
| ATOM | 231 | H2 | HOH A | 3 | 37.931 | 27.333 | 44.773 | H |
| ATOM | 232 | O  | HOH A | 1 | 37.892 | 27.567 | 65.926 | O |
| ATOM | 233 | H1 | HOH A | 2 | 38.691 | 27.097 | 65.608 | H |
| ATOM | 234 | H2 | HOH A | 3 | 37.899 | 27.549 | 66.905 | H |
| ATOM | 235 | O  | HOH A | 1 | 60.513 | 27.343 | 21.660 | O |
| ATOM | 236 | H1 | HOH A | 2 | 61.312 | 26.873 | 21.343 | H |
| ATOM | 237 | H2 | HOH A | 3 | 60.519 | 27.324 | 22.639 | H |
| ATOM | 238 | O  | HOH A | 1 | 60.502 | 27.381 | 43.823 | O |
| ATOM | 239 | H1 | HOH A | 2 | 61.306 | 26.915 | 43.511 | H |
| ATOM | 240 | H2 | HOH A | 3 | 60.507 | 27.371 | 44.803 | H |
| ATOM | 241 | O  | HOH A | 1 | 60.496 | 27.418 | 65.926 | O |
| ATOM | 242 | H1 | HOH A | 2 | 61.297 | 26.947 | 65.614 | H |
| ATOM | 243 | H2 | HOH A | 3 | 60.496 | 27.399 | 66.906 | H |
| ATOM | 244 | O  | HOH A | 1 | 19.803 | 27.343 | 21.791 | O |
| ATOM | 245 | H1 | HOH A | 2 | 20.617 | 26.892 | 21.482 | H |
| ATOM | 246 | H2 | HOH A | 3 | 19.804 | 27.330 | 22.771 | H |
| ATOM | 247 | O  | HOH A | 1 | 19.791 | 27.332 | 43.900 | O |
| ATOM | 248 | H1 | HOH A | 2 | 20.599 | 26.879 | 43.582 | H |
| ATOM | 249 | H2 | HOH A | 3 | 19.803 | 27.321 | 44.880 | H |
| ATOM | 250 | O  | HOH A | 1 | 19.818 | 27.428 | 65.998 | O |
| ATOM | 251 | H1 | HOH A | 2 | 20.633 | 26.983 | 65.683 | H |
| ATOM | 252 | H2 | HOH A | 3 | 19.822 | 27.408 | 66.978 | H |
| ATOM | 253 | O  | HOH A | 1 | 42.448 | 27.400 | 21.714 | O |
| ATOM | 254 | H1 | HOH A | 2 | 43.255 | 26.940 | 21.400 | H |

|      |     |    |       |   |        |        |        |   |
|------|-----|----|-------|---|--------|--------|--------|---|
| ATOM | 255 | H2 | HOH A | 3 | 42.452 | 27.382 | 22.694 | H |
| ATOM | 256 | O  | HOH A | 1 | 42.437 | 27.333 | 43.834 | O |
| ATOM | 257 | H1 | HOH A | 2 | 43.245 | 26.876 | 43.520 | H |
| ATOM | 258 | H2 | HOH A | 3 | 42.450 | 27.331 | 44.814 | H |
| ATOM | 259 | O  | HOH A | 1 | 42.396 | 27.546 | 65.963 | O |
| ATOM | 260 | H1 | HOH A | 2 | 43.201 | 27.086 | 65.644 | H |
| ATOM | 261 | H2 | HOH A | 3 | 42.411 | 27.536 | 66.943 | H |
| ATOM | 262 | O  | HOH A | 1 | 65.008 | 27.309 | 21.718 | O |
| ATOM | 263 | H1 | HOH A | 2 | 65.817 | 26.856 | 21.403 | H |
| ATOM | 264 | H2 | HOH A | 3 | 65.019 | 27.301 | 22.698 | H |
| ATOM | 265 | O  | HOH A | 1 | 64.997 | 27.359 | 43.876 | O |
| ATOM | 266 | H1 | HOH A | 2 | 65.806 | 26.901 | 43.567 | H |
| ATOM | 267 | H2 | HOH A | 3 | 65.003 | 27.359 | 44.856 | H |
| ATOM | 268 | O  | HOH A | 1 | 65.012 | 27.382 | 66.003 | O |
| ATOM | 269 | H1 | HOH A | 2 | 65.817 | 26.926 | 65.680 | H |
| ATOM | 270 | H2 | HOH A | 3 | 65.025 | 27.364 | 66.982 | H |
| ATOM | 271 | O  | HOH A | 1 | 22.104 | 31.286 | 21.772 | O |
| ATOM | 272 | H1 | HOH A | 2 | 22.071 | 32.210 | 21.448 | H |
| ATOM | 273 | H2 | HOH A | 3 | 22.102 | 31.308 | 22.751 | H |
| ATOM | 274 | O  | HOH A | 1 | 22.092 | 31.276 | 43.876 | O |
| ATOM | 275 | H1 | HOH A | 2 | 22.056 | 32.196 | 43.541 | H |
| ATOM | 276 | H2 | HOH A | 3 | 22.087 | 31.310 | 44.855 | H |
| ATOM | 277 | O  | HOH A | 1 | 22.100 | 31.386 | 65.980 | O |
| ATOM | 278 | H1 | HOH A | 2 | 22.064 | 32.310 | 65.655 | H |
| ATOM | 279 | H2 | HOH A | 3 | 22.100 | 31.409 | 66.960 | H |
| ATOM | 280 | O  | HOH A | 1 | 44.737 | 31.335 | 21.680 | O |
| ATOM | 281 | H1 | HOH A | 2 | 44.698 | 32.258 | 21.355 | H |
| ATOM | 282 | H2 | HOH A | 3 | 44.741 | 31.359 | 22.660 | H |
| ATOM | 283 | O  | HOH A | 1 | 44.738 | 31.273 | 43.809 | O |
| ATOM | 284 | H1 | HOH A | 2 | 44.700 | 32.193 | 43.473 | H |
| ATOM | 285 | H2 | HOH A | 3 | 44.739 | 31.308 | 44.789 | H |
| ATOM | 286 | O  | HOH A | 1 | 44.688 | 31.480 | 65.921 | O |
| ATOM | 287 | H1 | HOH A | 2 | 44.653 | 32.401 | 65.589 | H |
| ATOM | 288 | H2 | HOH A | 3 | 44.685 | 31.511 | 66.901 | H |
| ATOM | 289 | O  | HOH A | 1 | 67.305 | 31.248 | 21.702 | O |
| ATOM | 290 | H1 | HOH A | 2 | 67.272 | 32.170 | 21.372 | H |

|      |     |    |       |   |        |        |        |   |
|------|-----|----|-------|---|--------|--------|--------|---|
| ATOM | 291 | H2 | HOH A | 3 | 67.305 | 31.276 | 22.682 | H |
| ATOM | 292 | O  | HOH A | 1 | 67.292 | 31.300 | 43.856 | O |
| ATOM | 293 | H1 | HOH A | 2 | 67.260 | 32.222 | 43.525 | H |
| ATOM | 294 | H2 | HOH A | 3 | 67.285 | 31.329 | 44.835 | H |
| ATOM | 295 | O  | HOH A | 1 | 67.317 | 31.303 | 65.969 | O |
| ATOM | 296 | H1 | HOH A | 2 | 67.288 | 32.228 | 65.646 | H |
| ATOM | 297 | H2 | HOH A | 3 | 67.319 | 31.325 | 66.949 | H |
| ATOM | 298 | O  | HOH A | 1 | 4.030  | 31.254 | 21.772 | O |
| ATOM | 299 | H1 | HOH A | 2 | 4.814  | 30.771 | 21.435 | H |
| ATOM | 300 | H2 | HOH A | 3 | 3.229  | 30.792 | 21.449 | H |
| ATOM | 301 | O  | HOH A | 1 | 4.009  | 31.298 | 43.925 | O |
| ATOM | 302 | H1 | HOH A | 2 | 4.796  | 30.820 | 43.587 | H |
| ATOM | 303 | H2 | HOH A | 3 | 3.210  | 30.833 | 43.599 | H |
| ATOM | 304 | O  | HOH A | 1 | 4.041  | 31.295 | 66.021 | O |
| ATOM | 305 | H1 | HOH A | 2 | 4.827  | 30.819 | 65.682 | H |
| ATOM | 306 | H2 | HOH A | 3 | 3.242  | 30.832 | 65.694 | H |
| ATOM | 307 | O  | HOH A | 1 | 26.633 | 31.318 | 21.819 | O |
| ATOM | 308 | H1 | HOH A | 2 | 27.420 | 30.848 | 21.473 | H |
| ATOM | 309 | H2 | HOH A | 3 | 25.835 | 30.846 | 21.502 | H |
| ATOM | 310 | O  | HOH A | 1 | 26.634 | 31.278 | 43.906 | O |
| ATOM | 311 | H1 | HOH A | 2 | 27.419 | 30.797 | 43.570 | H |
| ATOM | 312 | H2 | HOH A | 3 | 25.833 | 30.814 | 43.584 | H |
| ATOM | 313 | O  | HOH A | 1 | 26.627 | 31.438 | 66.032 | O |
| ATOM | 314 | H1 | HOH A | 2 | 27.417 | 30.973 | 65.685 | H |
| ATOM | 315 | H2 | HOH A | 3 | 25.832 | 30.965 | 65.709 | H |
| ATOM | 316 | O  | HOH A | 1 | 49.257 | 31.327 | 21.715 | O |
| ATOM | 317 | H1 | HOH A | 2 | 50.040 | 30.844 | 21.376 | H |
| ATOM | 318 | H2 | HOH A | 3 | 48.455 | 30.868 | 21.391 | H |
| ATOM | 319 | O  | HOH A | 1 | 49.264 | 31.304 | 43.856 | O |
| ATOM | 320 | H1 | HOH A | 2 | 50.051 | 30.830 | 43.516 | H |
| ATOM | 321 | H2 | HOH A | 3 | 48.466 | 30.833 | 43.536 | H |
| ATOM | 322 | O  | HOH A | 1 | 49.221 | 31.455 | 65.969 | O |
| ATOM | 323 | H1 | HOH A | 2 | 50.002 | 30.969 | 65.631 | H |
| ATOM | 324 | H2 | HOH A | 3 | 48.417 | 30.996 | 65.648 | H |
| ATOM | 325 | O  | HOH A | 1 | 8.533  | 31.250 | 21.765 | O |
| ATOM | 326 | H1 | HOH A | 2 | 9.338  | 30.798 | 21.434 | H |

|      |     |    |       |   |        |        |        |   |
|------|-----|----|-------|---|--------|--------|--------|---|
| ATOM | 327 | H2 | HOH A | 3 | 8.544  | 32.171 | 21.432 | H |
| ATOM | 328 | O  | HOH A | 1 | 8.500  | 31.272 | 43.903 | O |
| ATOM | 329 | H1 | HOH A | 2 | 9.304  | 30.822 | 43.570 | H |
| ATOM | 330 | H2 | HOH A | 3 | 8.507  | 32.193 | 43.566 | H |
| ATOM | 331 | O  | HOH A | 1 | 8.545  | 31.284 | 65.994 | O |
| ATOM | 332 | H1 | HOH A | 2 | 9.347  | 30.830 | 65.663 | H |
| ATOM | 333 | H2 | HOH A | 3 | 8.554  | 32.203 | 65.654 | H |
| ATOM | 334 | O  | HOH A | 1 | 31.147 | 31.321 | 21.783 | O |
| ATOM | 335 | H1 | HOH A | 2 | 31.949 | 30.870 | 21.444 | H |
| ATOM | 336 | H2 | HOH A | 3 | 31.152 | 32.241 | 21.447 | H |
| ATOM | 337 | O  | HOH A | 1 | 31.153 | 31.245 | 43.879 | O |
| ATOM | 338 | H1 | HOH A | 2 | 31.955 | 30.795 | 43.538 | H |
| ATOM | 339 | H2 | HOH A | 3 | 31.153 | 32.163 | 43.536 | H |
| ATOM | 340 | O  | HOH A | 1 | 31.142 | 31.460 | 65.998 | O |
| ATOM | 341 | H1 | HOH A | 2 | 31.944 | 31.009 | 65.659 | H |
| ATOM | 342 | H2 | HOH A | 3 | 31.150 | 32.382 | 65.665 | H |
| ATOM | 343 | O  | HOH A | 1 | 53.765 | 31.298 | 21.697 | O |
| ATOM | 344 | H1 | HOH A | 2 | 54.563 | 30.842 | 21.355 | H |
| ATOM | 345 | H2 | HOH A | 3 | 53.775 | 32.218 | 21.360 | H |
| ATOM | 346 | O  | HOH A | 1 | 53.766 | 31.299 | 43.844 | O |
| ATOM | 347 | H1 | HOH A | 2 | 54.567 | 30.842 | 43.510 | H |
| ATOM | 348 | H2 | HOH A | 3 | 53.780 | 32.218 | 43.505 | H |
| ATOM | 349 | O  | HOH A | 1 | 53.743 | 31.420 | 65.956 | O |
| ATOM | 350 | H1 | HOH A | 2 | 54.541 | 30.959 | 65.622 | H |
| ATOM | 351 | H2 | HOH A | 3 | 53.763 | 32.340 | 65.621 | H |
| ATOM | 352 | O  | HOH A | 1 | 13.071 | 31.251 | 21.779 | O |
| ATOM | 353 | H1 | HOH A | 2 | 12.275 | 30.780 | 21.454 | H |
| ATOM | 354 | H2 | HOH A | 3 | 13.049 | 31.241 | 22.759 | H |
| ATOM | 355 | O  | HOH A | 1 | 13.050 | 31.272 | 43.909 | O |
| ATOM | 356 | H1 | HOH A | 2 | 12.249 | 30.804 | 43.593 | H |
| ATOM | 357 | H2 | HOH A | 3 | 13.038 | 31.264 | 44.889 | H |
| ATOM | 358 | O  | HOH A | 1 | 13.079 | 31.304 | 65.993 | O |
| ATOM | 359 | H1 | HOH A | 2 | 12.280 | 30.832 | 65.678 | H |
| ATOM | 360 | H2 | HOH A | 3 | 13.072 | 31.292 | 66.972 | H |
| ATOM | 361 | O  | HOH A | 1 | 35.690 | 31.351 | 21.735 | O |
| ATOM | 362 | H1 | HOH A | 2 | 34.891 | 30.881 | 21.416 | H |

|      |     |    |       |   |        |        |        |   |
|------|-----|----|-------|---|--------|--------|--------|---|
| ATOM | 363 | H2 | HOH A | 3 | 35.680 | 31.334 | 22.715 | H |
| ATOM | 364 | O  | HOH A | 1 | 35.693 | 31.255 | 43.844 | O |
| ATOM | 365 | H1 | HOH A | 2 | 34.892 | 30.786 | 43.531 | H |
| ATOM | 366 | H2 | HOH A | 3 | 35.681 | 31.253 | 44.824 | H |
| ATOM | 367 | O  | HOH A | 1 | 35.667 | 31.482 | 65.970 | O |
| ATOM | 368 | H1 | HOH A | 2 | 34.870 | 31.012 | 65.649 | H |
| ATOM | 369 | H2 | HOH A | 3 | 35.649 | 31.477 | 66.950 | H |
| ATOM | 370 | O  | HOH A | 1 | 58.291 | 31.280 | 21.687 | O |
| ATOM | 371 | H1 | HOH A | 2 | 57.492 | 30.810 | 21.369 | H |
| ATOM | 372 | H2 | HOH A | 3 | 58.278 | 31.268 | 22.667 | H |
| ATOM | 373 | O  | HOH A | 1 | 58.279 | 31.301 | 43.862 | O |
| ATOM | 374 | H1 | HOH A | 2 | 57.482 | 30.828 | 43.544 | H |
| ATOM | 375 | H2 | HOH A | 3 | 58.266 | 31.291 | 44.842 | H |
| ATOM | 376 | O  | HOH A | 1 | 58.269 | 31.365 | 65.947 | O |
| ATOM | 377 | H1 | HOH A | 2 | 57.467 | 30.901 | 65.627 | H |
| ATOM | 378 | H2 | HOH A | 3 | 58.255 | 31.352 | 66.927 | H |
| ATOM | 379 | O  | HOH A | 1 | 17.578 | 31.251 | 21.795 | O |
| ATOM | 380 | H1 | HOH A | 2 | 18.371 | 30.791 | 21.447 | H |
| ATOM | 381 | H2 | HOH A | 3 | 16.785 | 30.785 | 21.457 | H |
| ATOM | 382 | O  | HOH A | 1 | 17.557 | 31.255 | 43.906 | O |
| ATOM | 383 | H1 | HOH A | 2 | 18.345 | 30.788 | 43.558 | H |
| ATOM | 384 | H2 | HOH A | 3 | 16.759 | 30.789 | 43.579 | H |
| ATOM | 385 | O  | HOH A | 1 | 17.576 | 31.328 | 65.993 | O |
| ATOM | 386 | H1 | HOH A | 2 | 18.372 | 30.869 | 65.652 | H |
| ATOM | 387 | H2 | HOH A | 3 | 16.786 | 30.853 | 65.659 | H |
| ATOM | 388 | O  | HOH A | 1 | 40.208 | 31.333 | 21.723 | O |
| ATOM | 389 | H1 | HOH A | 2 | 40.994 | 30.862 | 21.374 | H |
| ATOM | 390 | H2 | HOH A | 3 | 39.408 | 30.871 | 21.397 | H |
| ATOM | 391 | O  | HOH A | 1 | 40.219 | 31.248 | 43.832 | O |
| ATOM | 392 | H1 | HOH A | 2 | 41.008 | 30.782 | 43.485 | H |
| ATOM | 393 | H2 | HOH A | 3 | 39.422 | 30.783 | 43.502 | H |
| ATOM | 394 | O  | HOH A | 1 | 40.176 | 31.478 | 65.961 | O |
| ATOM | 395 | H1 | HOH A | 2 | 40.963 | 31.011 | 65.611 | H |
| ATOM | 396 | H2 | HOH A | 3 | 39.377 | 31.017 | 65.629 | H |
| ATOM | 397 | O  | HOH A | 1 | 62.793 | 31.239 | 21.704 | O |
| ATOM | 398 | H1 | HOH A | 2 | 63.578 | 30.762 | 21.362 | H |

|      |     |    |       |   |        |        |        |   |
|------|-----|----|-------|---|--------|--------|--------|---|
| ATOM | 399 | H2 | HOH A | 3 | 61.992 | 30.780 | 21.374 | H |
| ATOM | 400 | O  | HOH A | 1 | 62.778 | 31.290 | 43.885 | O |
| ATOM | 401 | H1 | HOH A | 2 | 63.565 | 30.819 | 43.539 | H |
| ATOM | 402 | H2 | HOH A | 3 | 61.979 | 30.828 | 43.555 | H |
| ATOM | 403 | O  | HOH A | 1 | 62.783 | 31.320 | 65.978 | O |
| ATOM | 404 | H1 | HOH A | 2 | 63.568 | 30.845 | 65.634 | H |
| ATOM | 405 | H2 | HOH A | 3 | 61.983 | 30.857 | 65.652 | H |
| ATOM | 406 | O  | HOH A | 1 | 1.738  | 35.105 | 21.717 | O |
| ATOM | 407 | H1 | HOH A | 2 | 2.544  | 34.659 | 21.381 | H |
| ATOM | 408 | H2 | HOH A | 3 | 1.745  | 36.029 | 21.389 | H |
| ATOM | 409 | O  | HOH A | 1 | 1.698  | 35.164 | 43.863 | O |
| ATOM | 410 | H1 | HOH A | 2 | 2.504  | 34.716 | 43.531 | H |
| ATOM | 411 | H2 | HOH A | 3 | 1.706  | 36.086 | 43.530 | H |
| ATOM | 412 | O  | HOH A | 1 | 1.752  | 35.161 | 65.976 | O |
| ATOM | 413 | H1 | HOH A | 2 | 2.555  | 34.714 | 65.637 | H |
| ATOM | 414 | H2 | HOH A | 3 | 1.757  | 36.084 | 65.648 | H |
| ATOM | 415 | O  | HOH A | 1 | 24.332 | 35.176 | 21.777 | O |
| ATOM | 416 | H1 | HOH A | 2 | 25.137 | 34.732 | 21.440 | H |
| ATOM | 417 | H2 | HOH A | 3 | 24.332 | 36.097 | 21.443 | H |
| ATOM | 418 | O  | HOH A | 1 | 24.318 | 35.143 | 43.862 | O |
| ATOM | 419 | H1 | HOH A | 2 | 25.125 | 34.698 | 43.529 | H |
| ATOM | 420 | H2 | HOH A | 3 | 24.325 | 36.067 | 43.535 | H |
| ATOM | 421 | O  | HOH A | 1 | 24.319 | 35.289 | 65.993 | O |
| ATOM | 422 | H1 | HOH A | 2 | 25.123 | 34.847 | 65.650 | H |
| ATOM | 423 | H2 | HOH A | 3 | 24.318 | 36.213 | 65.666 | H |
| ATOM | 424 | O  | HOH A | 1 | 46.960 | 35.192 | 21.665 | O |
| ATOM | 425 | H1 | HOH A | 2 | 47.764 | 34.747 | 21.323 | H |
| ATOM | 426 | H2 | HOH A | 3 | 46.961 | 36.115 | 21.334 | H |
| ATOM | 427 | O  | HOH A | 1 | 46.961 | 35.165 | 43.805 | O |
| ATOM | 428 | H1 | HOH A | 2 | 47.770 | 34.724 | 43.471 | H |
| ATOM | 429 | H2 | HOH A | 3 | 46.962 | 36.088 | 43.476 | H |
| ATOM | 430 | O  | HOH A | 1 | 46.919 | 35.333 | 65.916 | O |
| ATOM | 431 | H1 | HOH A | 2 | 47.724 | 34.883 | 65.585 | H |
| ATOM | 432 | H2 | HOH A | 3 | 46.928 | 36.254 | 65.583 | H |
| ATOM | 433 | O  | HOH A | 1 | 6.271  | 35.137 | 21.729 | O |
| ATOM | 434 | H1 | HOH A | 2 | 6.282  | 36.066 | 21.420 | H |



|      |     |    |       |   |        |        |        |   |
|------|-----|----|-------|---|--------|--------|--------|---|
| ATOM | 435 | H2 | HOH A | 3 | 6.260  | 35.143 | 22.709 | H |
| ATOM | 436 | O  | HOH A | 1 | 6.226  | 35.178 | 43.875 | O |
| ATOM | 437 | H1 | HOH A | 2 | 6.235  | 36.109 | 43.572 | H |
| ATOM | 438 | H2 | HOH A | 3 | 6.229  | 35.178 | 44.855 | H |
| ATOM | 439 | O  | HOH A | 1 | 6.289  | 35.174 | 65.984 | O |
| ATOM | 440 | H1 | HOH A | 2 | 6.300  | 36.106 | 65.682 | H |
| ATOM | 441 | H2 | HOH A | 3 | 6.283  | 35.174 | 66.964 | H |
| ATOM | 442 | O  | HOH A | 1 | 28.872 | 35.203 | 21.756 | O |
| ATOM | 443 | H1 | HOH A | 2 | 28.885 | 36.133 | 21.448 | H |
| ATOM | 444 | H2 | HOH A | 3 | 28.871 | 35.208 | 22.736 | H |
| ATOM | 445 | O  | HOH A | 1 | 28.874 | 35.147 | 43.859 | O |
| ATOM | 446 | H1 | HOH A | 2 | 28.886 | 36.077 | 43.551 | H |
| ATOM | 447 | H2 | HOH A | 3 | 28.878 | 35.152 | 44.839 | H |
| ATOM | 448 | O  | HOH A | 1 | 28.849 | 35.338 | 65.972 | O |
| ATOM | 449 | H1 | HOH A | 2 | 28.856 | 36.268 | 65.662 | H |
| ATOM | 450 | H2 | HOH A | 3 | 28.842 | 35.346 | 66.952 | H |
| ATOM | 451 | O  | HOH A | 1 | 51.489 | 35.211 | 21.653 | O |
| ATOM | 452 | H1 | HOH A | 2 | 51.502 | 36.145 | 21.355 | H |
| ATOM | 453 | H2 | HOH A | 3 | 51.487 | 35.206 | 22.633 | H |
| ATOM | 454 | O  | HOH A | 1 | 51.494 | 35.188 | 43.808 | O |
| ATOM | 455 | H1 | HOH A | 2 | 51.505 | 36.117 | 43.493 | H |
| ATOM | 456 | H2 | HOH A | 3 | 51.490 | 35.200 | 44.787 | H |
| ATOM | 457 | O  | HOH A | 1 | 51.477 | 35.326 | 65.919 | O |
| ATOM | 458 | H1 | HOH A | 2 | 51.489 | 36.258 | 65.614 | H |
| ATOM | 459 | H2 | HOH A | 3 | 51.473 | 35.328 | 66.899 | H |
| ATOM | 460 | O  | HOH A | 1 | 10.772 | 35.136 | 21.760 | O |
| ATOM | 461 | H1 | HOH A | 2 | 11.579 | 34.687 | 21.432 | H |
| ATOM | 462 | H2 | HOH A | 3 | 10.784 | 36.059 | 21.430 | H |
| ATOM | 463 | O  | HOH A | 1 | 10.724 | 35.164 | 43.891 | O |
| ATOM | 464 | H1 | HOH A | 2 | 11.526 | 34.709 | 43.561 | H |
| ATOM | 465 | H2 | HOH A | 3 | 10.737 | 36.084 | 43.553 | H |
| ATOM | 466 | O  | HOH A | 1 | 10.781 | 35.181 | 65.984 | O |
| ATOM | 467 | H1 | HOH A | 2 | 11.587 | 34.731 | 65.655 | H |
| ATOM | 468 | H2 | HOH A | 3 | 10.793 | 36.104 | 65.654 | H |
| ATOM | 469 | O  | HOH A | 1 | 33.367 | 35.224 | 21.736 | O |
| ATOM | 470 | H1 | HOH A | 2 | 34.174 | 34.777 | 21.408 | H |

|      |     |    |       |   |        |        |        |   |
|------|-----|----|-------|---|--------|--------|--------|---|
| ATOM | 471 | H2 | HOH A | 3 | 33.378 | 36.148 | 21.408 | H |
| ATOM | 472 | O  | HOH A | 1 | 33.387 | 35.149 | 43.843 | O |
| ATOM | 473 | H1 | HOH A | 2 | 34.184 | 34.688 | 43.507 | H |
| ATOM | 474 | H2 | HOH A | 3 | 33.404 | 36.068 | 43.504 | H |
| ATOM | 475 | O  | HOH A | 1 | 33.360 | 35.364 | 65.976 | O |
| ATOM | 476 | H1 | HOH A | 2 | 34.166 | 34.916 | 65.644 | H |
| ATOM | 477 | H2 | HOH A | 3 | 33.374 | 36.290 | 65.655 | H |
| ATOM | 478 | O  | HOH A | 1 | 55.987 | 35.187 | 21.679 | O |
| ATOM | 479 | H1 | HOH A | 2 | 56.790 | 34.729 | 21.355 | H |
| ATOM | 480 | H2 | HOH A | 3 | 56.010 | 36.109 | 21.347 | H |
| ATOM | 481 | O  | HOH A | 1 | 55.976 | 35.205 | 43.830 | O |
| ATOM | 482 | H1 | HOH A | 2 | 56.783 | 34.751 | 43.510 | H |
| ATOM | 483 | H2 | HOH A | 3 | 55.991 | 36.125 | 43.492 | H |
| ATOM | 484 | O  | HOH A | 1 | 55.974 | 35.291 | 65.926 | O |
| ATOM | 485 | H1 | HOH A | 2 | 56.779 | 34.835 | 65.603 | H |
| ATOM | 486 | H2 | HOH A | 3 | 55.993 | 36.212 | 65.590 | H |
| ATOM | 487 | O  | HOH A | 1 | 15.297 | 35.166 | 21.803 | O |
| ATOM | 488 | H1 | HOH A | 2 | 16.094 | 34.695 | 21.482 | H |
| ATOM | 489 | H2 | HOH A | 3 | 14.509 | 34.697 | 21.459 | H |
| ATOM | 490 | O  | HOH A | 1 | 15.271 | 35.186 | 43.900 | O |
| ATOM | 491 | H1 | HOH A | 2 | 16.061 | 34.707 | 43.574 | H |
| ATOM | 492 | H2 | HOH A | 3 | 14.476 | 34.728 | 43.556 | H |
| ATOM | 493 | O  | HOH A | 1 | 15.294 | 35.226 | 66.008 | O |
| ATOM | 494 | H1 | HOH A | 2 | 16.096 | 34.768 | 65.679 | H |
| ATOM | 495 | H2 | HOH A | 3 | 14.510 | 34.749 | 65.663 | H |
| ATOM | 496 | O  | HOH A | 1 | 37.916 | 35.253 | 21.749 | O |
| ATOM | 497 | H1 | HOH A | 2 | 38.706 | 34.781 | 21.413 | H |
| ATOM | 498 | H2 | HOH A | 3 | 37.120 | 34.790 | 21.414 | H |
| ATOM | 499 | O  | HOH A | 1 | 37.919 | 35.161 | 43.846 | O |
| ATOM | 500 | H1 | HOH A | 2 | 38.715 | 34.692 | 43.519 | H |
| ATOM | 501 | H2 | HOH A | 3 | 37.129 | 34.686 | 43.511 | H |
| ATOM | 502 | O  | HOH A | 1 | 37.883 | 35.401 | 65.979 | O |
| ATOM | 503 | H1 | HOH A | 2 | 38.676 | 34.926 | 65.653 | H |
| ATOM | 504 | H2 | HOH A | 3 | 37.090 | 34.936 | 65.641 | H |
| ATOM | 505 | O  | HOH A | 1 | 60.517 | 35.175 | 21.688 | O |
| ATOM | 506 | H1 | HOH A | 2 | 61.305 | 34.696 | 21.356 | H |

|      |     |    |       |   |        |        |        |   |
|------|-----|----|-------|---|--------|--------|--------|---|
| ATOM | 507 | H2 | HOH A | 3 | 59.719 | 34.710 | 21.359 | H |
| ATOM | 508 | O  | HOH A | 1 | 60.493 | 35.213 | 43.862 | O |
| ATOM | 509 | H1 | HOH A | 2 | 61.288 | 34.740 | 43.538 | H |
| ATOM | 510 | H2 | HOH A | 3 | 59.703 | 34.747 | 43.517 | H |
| ATOM | 511 | O  | HOH A | 1 | 60.496 | 35.264 | 65.975 | O |
| ATOM | 512 | H1 | HOH A | 2 | 61.285 | 34.785 | 65.647 | H |
| ATOM | 513 | H2 | HOH A | 3 | 59.699 | 34.802 | 65.639 | H |
| ATOM | 514 | O  | HOH A | 1 | 19.803 | 35.188 | 21.790 | O |
| ATOM | 515 | H1 | HOH A | 2 | 20.605 | 34.745 | 21.441 | H |
| ATOM | 516 | H2 | HOH A | 3 | 19.802 | 36.112 | 21.465 | H |
| ATOM | 517 | O  | HOH A | 1 | 19.791 | 35.191 | 43.881 | O |
| ATOM | 518 | H1 | HOH A | 2 | 20.588 | 34.739 | 43.532 | H |
| ATOM | 519 | H2 | HOH A | 3 | 19.795 | 36.112 | 43.547 | H |
| ATOM | 520 | O  | HOH A | 1 | 19.808 | 35.269 | 65.990 | O |
| ATOM | 521 | H1 | HOH A | 2 | 20.612 | 34.833 | 65.639 | H |
| ATOM | 522 | H2 | HOH A | 3 | 19.803 | 36.196 | 65.672 | H |
| ATOM | 523 | O  | HOH A | 1 | 42.440 | 35.255 | 21.698 | O |
| ATOM | 524 | H1 | HOH A | 2 | 43.238 | 34.810 | 21.343 | H |
| ATOM | 525 | H2 | HOH A | 3 | 42.444 | 36.182 | 21.378 | H |
| ATOM | 526 | O  | HOH A | 1 | 42.443 | 35.177 | 43.816 | O |
| ATOM | 527 | H1 | HOH A | 2 | 43.245 | 34.733 | 43.468 | H |
| ATOM | 528 | H2 | HOH A | 3 | 42.439 | 36.099 | 43.484 | H |
| ATOM | 529 | O  | HOH A | 1 | 42.398 | 35.396 | 65.949 | O |
| ATOM | 530 | H1 | HOH A | 2 | 43.194 | 34.950 | 65.592 | H |
| ATOM | 531 | H2 | HOH A | 3 | 42.394 | 36.319 | 65.620 | H |
| ATOM | 532 | O  | HOH A | 1 | 65.015 | 35.162 | 21.691 | O |
| ATOM | 533 | H1 | HOH A | 2 | 65.815 | 34.717 | 21.341 | H |
| ATOM | 534 | H2 | HOH A | 3 | 65.016 | 36.087 | 21.367 | H |
| ATOM | 535 | O  | HOH A | 1 | 64.989 | 35.204 | 43.863 | O |
| ATOM | 536 | H1 | HOH A | 2 | 65.788 | 34.757 | 43.512 | H |
| ATOM | 537 | H2 | HOH A | 3 | 64.986 | 36.125 | 43.530 | H |
| ATOM | 538 | O  | HOH A | 1 | 65.009 | 35.223 | 65.978 | O |
| ATOM | 539 | H1 | HOH A | 2 | 65.806 | 34.775 | 65.626 | H |
| ATOM | 540 | H2 | HOH A | 3 | 65.015 | 36.149 | 65.656 | H |
| ATOM | 541 | O  | HOH A | 1 | 22.052 | 39.090 | 21.749 | O |
| ATOM | 542 | H1 | HOH A | 2 | 22.864 | 38.632 | 21.449 | H |

|      |     |    |       |   |        |        |        |   |
|------|-----|----|-------|---|--------|--------|--------|---|
| ATOM | 543 | H2 | HOH A | 3 | 22.046 | 39.084 | 22.729 | H |
| ATOM | 544 | O  | HOH A | 1 | 22.053 | 39.067 | 43.861 | O |
| ATOM | 545 | H1 | HOH A | 2 | 22.863 | 38.603 | 43.562 | H |
| ATOM | 546 | H2 | HOH A | 3 | 22.053 | 39.075 | 44.841 | H |
| ATOM | 547 | O  | HOH A | 1 | 22.050 | 39.184 | 65.966 | O |
| ATOM | 548 | H1 | HOH A | 2 | 22.859 | 38.727 | 65.654 | H |
| ATOM | 549 | H2 | HOH A | 3 | 22.057 | 39.177 | 66.946 | H |
| ATOM | 550 | O  | HOH A | 1 | 44.677 | 39.140 | 21.671 | O |
| ATOM | 551 | H1 | HOH A | 2 | 45.479 | 38.669 | 21.361 | H |
| ATOM | 552 | H2 | HOH A | 3 | 44.677 | 39.123 | 22.651 | H |
| ATOM | 553 | O  | HOH A | 1 | 44.671 | 39.091 | 43.797 | O |
| ATOM | 554 | H1 | HOH A | 2 | 45.481 | 38.633 | 43.489 | H |
| ATOM | 555 | H2 | HOH A | 3 | 44.677 | 39.090 | 44.777 | H |
| ATOM | 556 | O  | HOH A | 1 | 44.654 | 39.268 | 65.923 | O |
| ATOM | 557 | H1 | HOH A | 2 | 45.459 | 38.801 | 65.616 | H |
| ATOM | 558 | H2 | HOH A | 3 | 44.655 | 39.264 | 66.903 | H |
| ATOM | 559 | O  | HOH A | 1 | 67.277 | 39.042 | 21.699 | O |
| ATOM | 560 | H1 | HOH A | 2 | 68.086 | 38.575 | 21.401 | H |
| ATOM | 561 | H2 | HOH A | 3 | 67.267 | 39.035 | 22.679 | H |
| ATOM | 562 | O  | HOH A | 1 | 67.232 | 39.088 | 43.857 | O |
| ATOM | 563 | H1 | HOH A | 2 | 68.040 | 38.625 | 43.551 | H |
| ATOM | 564 | H2 | HOH A | 3 | 67.235 | 39.086 | 44.837 | H |
| ATOM | 565 | O  | HOH A | 1 | 67.273 | 39.111 | 65.971 | O |
| ATOM | 566 | H1 | HOH A | 2 | 68.081 | 38.647 | 65.667 | H |
| ATOM | 567 | H2 | HOH A | 3 | 67.273 | 39.107 | 66.951 | H |
| ATOM | 568 | O  | HOH A | 1 | 3.991  | 39.026 | 21.771 | O |
| ATOM | 569 | H1 | HOH A | 2 | 4.799  | 38.581 | 21.439 | H |
| ATOM | 570 | H2 | HOH A | 3 | 3.996  | 39.948 | 21.438 | H |
| ATOM | 571 | O  | HOH A | 1 | 3.949  | 39.083 | 43.913 | O |
| ATOM | 572 | H1 | HOH A | 2 | 4.752  | 38.636 | 43.573 | H |
| ATOM | 573 | H2 | HOH A | 3 | 3.958  | 40.009 | 43.592 | H |
| ATOM | 574 | O  | HOH A | 1 | 3.997  | 39.076 | 66.023 | O |
| ATOM | 575 | H1 | HOH A | 2 | 4.805  | 38.635 | 65.688 | H |
| ATOM | 576 | H2 | HOH A | 3 | 4.004  | 40.003 | 65.707 | H |
| ATOM | 577 | O  | HOH A | 1 | 26.581 | 39.109 | 21.786 | O |
| ATOM | 578 | H1 | HOH A | 2 | 27.389 | 38.669 | 21.450 | H |

|      |     |    |       |   |        |        |        |   |
|------|-----|----|-------|---|--------|--------|--------|---|
| ATOM | 579 | H2 | HOH A | 3 | 26.584 | 40.035 | 21.463 | H |
| ATOM | 580 | O  | HOH A | 1 | 26.597 | 39.045 | 43.889 | O |
| ATOM | 581 | H1 | HOH A | 2 | 27.403 | 38.602 | 43.551 | H |
| ATOM | 582 | H2 | HOH A | 3 | 26.597 | 39.968 | 43.558 | H |
| ATOM | 583 | O  | HOH A | 1 | 26.574 | 39.222 | 66.010 | O |
| ATOM | 584 | H1 | HOH A | 2 | 27.381 | 38.785 | 65.668 | H |
| ATOM | 585 | H2 | HOH A | 3 | 26.576 | 40.151 | 65.697 | H |
| ATOM | 586 | O  | HOH A | 1 | 49.197 | 39.103 | 21.703 | O |
| ATOM | 587 | H1 | HOH A | 2 | 50.001 | 38.659 | 21.363 | H |
| ATOM | 588 | H2 | HOH A | 3 | 49.205 | 40.030 | 21.385 | H |
| ATOM | 589 | O  | HOH A | 1 | 49.201 | 39.088 | 43.845 | O |
| ATOM | 590 | H1 | HOH A | 2 | 50.005 | 38.637 | 43.511 | H |
| ATOM | 591 | H2 | HOH A | 3 | 49.213 | 40.011 | 43.517 | H |
| ATOM | 592 | O  | HOH A | 1 | 49.181 | 39.239 | 65.968 | O |
| ATOM | 593 | H1 | HOH A | 2 | 49.984 | 38.795 | 65.623 | H |
| ATOM | 594 | H2 | HOH A | 3 | 49.185 | 40.165 | 65.648 | H |
| ATOM | 595 | O  | HOH A | 1 | 8.530  | 39.058 | 21.764 | O |
| ATOM | 596 | H1 | HOH A | 2 | 8.535  | 39.982 | 21.437 | H |
| ATOM | 597 | H2 | HOH A | 3 | 8.521  | 39.085 | 22.744 | H |
| ATOM | 598 | O  | HOH A | 1 | 8.499  | 39.091 | 43.899 | O |
| ATOM | 599 | H1 | HOH A | 2 | 8.501  | 40.019 | 43.583 | H |
| ATOM | 600 | H2 | HOH A | 3 | 8.488  | 39.105 | 44.878 | H |
| ATOM | 601 | O  | HOH A | 1 | 8.549  | 39.083 | 66.002 | O |
| ATOM | 602 | H1 | HOH A | 2 | 8.546  | 40.011 | 65.686 | H |
| ATOM | 603 | H2 | HOH A | 3 | 8.535  | 39.096 | 66.981 | H |
| ATOM | 604 | O  | HOH A | 1 | 31.141 | 39.137 | 21.755 | O |
| ATOM | 605 | H1 | HOH A | 2 | 31.138 | 40.064 | 21.437 | H |
| ATOM | 606 | H2 | HOH A | 3 | 31.129 | 39.153 | 22.735 | H |
| ATOM | 607 | O  | HOH A | 1 | 31.163 | 39.054 | 43.855 | O |
| ATOM | 608 | H1 | HOH A | 2 | 31.159 | 39.977 | 43.527 | H |
| ATOM | 609 | H2 | HOH A | 3 | 31.156 | 39.081 | 44.835 | H |
| ATOM | 610 | O  | HOH A | 1 | 31.144 | 39.277 | 65.976 | O |
| ATOM | 611 | H1 | HOH A | 2 | 31.134 | 40.202 | 65.651 | H |
| ATOM | 612 | H2 | HOH A | 3 | 31.133 | 39.300 | 66.955 | H |
| ATOM | 613 | O  | HOH A | 1 | 53.772 | 39.107 | 21.676 | O |
| ATOM | 614 | H1 | HOH A | 2 | 53.774 | 40.032 | 21.354 | H |

|      |     |    |       |   |        |        |        |   |
|------|-----|----|-------|---|--------|--------|--------|---|
| ATOM | 615 | H2 | HOH A | 3 | 53.761 | 39.126 | 22.655 | H |
| ATOM | 616 | O  | HOH A | 1 | 53.753 | 39.091 | 43.826 | O |
| ATOM | 617 | H1 | HOH A | 2 | 53.751 | 40.016 | 43.501 | H |
| ATOM | 618 | H2 | HOH A | 3 | 53.741 | 39.115 | 44.805 | H |
| ATOM | 619 | O  | HOH A | 1 | 53.746 | 39.223 | 65.950 | O |
| ATOM | 620 | H1 | HOH A | 2 | 53.749 | 40.151 | 65.635 | H |
| ATOM | 621 | H2 | HOH A | 3 | 53.735 | 39.236 | 66.930 | H |
| ATOM | 622 | O  | HOH A | 1 | 13.050 | 39.075 | 21.775 | O |
| ATOM | 623 | H1 | HOH A | 2 | 12.237 | 38.627 | 21.460 | H |
| ATOM | 624 | H2 | HOH A | 3 | 13.032 | 39.999 | 21.450 | H |
| ATOM | 625 | O  | HOH A | 1 | 13.027 | 39.114 | 43.895 | O |
| ATOM | 626 | H1 | HOH A | 2 | 12.215 | 38.664 | 43.580 | H |
| ATOM | 627 | H2 | HOH A | 3 | 13.006 | 40.038 | 43.570 | H |
| ATOM | 628 | O  | HOH A | 1 | 13.055 | 39.147 | 65.999 | O |
| ATOM | 629 | H1 | HOH A | 2 | 12.244 | 38.693 | 65.689 | H |
| ATOM | 630 | H2 | HOH A | 3 | 13.027 | 40.072 | 65.675 | H |
| ATOM | 631 | O  | HOH A | 1 | 35.661 | 39.181 | 21.724 | O |
| ATOM | 632 | H1 | HOH A | 2 | 34.845 | 38.736 | 21.415 | H |
| ATOM | 633 | H2 | HOH A | 3 | 35.644 | 40.106 | 21.398 | H |
| ATOM | 634 | O  | HOH A | 1 | 35.687 | 39.105 | 43.826 | O |
| ATOM | 635 | H1 | HOH A | 2 | 34.878 | 38.649 | 43.514 | H |
| ATOM | 636 | H2 | HOH A | 3 | 35.659 | 40.029 | 43.501 | H |
| ATOM | 637 | O  | HOH A | 1 | 35.658 | 39.329 | 65.969 | O |
| ATOM | 638 | H1 | HOH A | 2 | 34.850 | 38.872 | 65.655 | H |
| ATOM | 639 | H2 | HOH A | 3 | 35.632 | 40.251 | 65.640 | H |
| ATOM | 640 | O  | HOH A | 1 | 58.285 | 39.121 | 21.683 | O |
| ATOM | 641 | H1 | HOH A | 2 | 57.470 | 38.675 | 21.372 | H |
| ATOM | 642 | H2 | HOH A | 3 | 58.266 | 40.046 | 21.360 | H |
| ATOM | 643 | O  | HOH A | 1 | 58.260 | 39.146 | 43.836 | O |
| ATOM | 644 | H1 | HOH A | 2 | 57.449 | 38.694 | 43.520 | H |
| ATOM | 645 | H2 | HOH A | 3 | 58.240 | 40.069 | 43.508 | H |
| ATOM | 646 | O  | HOH A | 1 | 58.264 | 39.205 | 65.953 | O |
| ATOM | 647 | H1 | HOH A | 2 | 57.452 | 38.759 | 65.634 | H |
| ATOM | 648 | H2 | HOH A | 3 | 58.247 | 40.131 | 65.634 | H |
| ATOM | 649 | O  | HOH A | 1 | 17.535 | 39.076 | 21.799 | O |
| ATOM | 650 | H1 | HOH A | 2 | 18.325 | 38.614 | 21.450 | H |

|      |     |    |       |   |        |        |        |   |
|------|-----|----|-------|---|--------|--------|--------|---|
| ATOM | 651 | H2 | HOH A | 3 | 16.740 | 38.605 | 21.473 | H |
| ATOM | 652 | O  | HOH A | 1 | 17.520 | 39.097 | 43.906 | O |
| ATOM | 653 | H1 | HOH A | 2 | 18.303 | 38.625 | 43.553 | H |
| ATOM | 654 | H2 | HOH A | 3 | 16.718 | 38.631 | 43.590 | H |
| ATOM | 655 | O  | HOH A | 1 | 17.527 | 39.157 | 66.008 | O |
| ATOM | 656 | H1 | HOH A | 2 | 18.319 | 38.695 | 65.661 | H |
| ATOM | 657 | H2 | HOH A | 3 | 16.734 | 38.676 | 65.691 | H |
| ATOM | 658 | O  | HOH A | 1 | 40.148 | 39.161 | 21.737 | O |
| ATOM | 659 | H1 | HOH A | 2 | 40.937 | 38.692 | 21.392 | H |
| ATOM | 660 | H2 | HOH A | 3 | 39.351 | 38.688 | 21.418 | H |
| ATOM | 661 | O  | HOH A | 1 | 40.163 | 39.081 | 43.834 | O |
| ATOM | 662 | H1 | HOH A | 2 | 40.957 | 38.620 | 43.493 | H |
| ATOM | 663 | H2 | HOH A | 3 | 39.371 | 38.603 | 43.509 | H |
| ATOM | 664 | O  | HOH A | 1 | 40.141 | 39.322 | 65.963 | O |
| ATOM | 665 | H1 | HOH A | 2 | 40.929 | 38.854 | 65.616 | H |
| ATOM | 666 | H2 | HOH A | 3 | 39.344 | 38.847 | 65.649 | H |
| ATOM | 667 | O  | HOH A | 1 | 62.754 | 39.081 | 21.706 | O |
| ATOM | 668 | H1 | HOH A | 2 | 63.539 | 38.610 | 21.355 | H |
| ATOM | 669 | H2 | HOH A | 3 | 61.954 | 38.619 | 21.381 | H |
| ATOM | 670 | O  | HOH A | 1 | 62.731 | 39.122 | 43.860 | O |
| ATOM | 671 | H1 | HOH A | 2 | 63.520 | 38.651 | 43.520 | H |
| ATOM | 672 | H2 | HOH A | 3 | 61.934 | 38.654 | 43.535 | H |
| ATOM | 673 | O  | HOH A | 1 | 62.750 | 39.165 | 65.991 | O |
| ATOM | 674 | H1 | HOH A | 2 | 63.537 | 38.691 | 65.649 | H |
| ATOM | 675 | H2 | HOH A | 3 | 61.951 | 38.696 | 65.670 | H |
| ATOM | 676 | O  | HOH A | 1 | 1.760  | 42.946 | 21.728 | O |
| ATOM | 677 | H1 | HOH A | 2 | 0.951  | 42.495 | 21.408 | H |
| ATOM | 678 | H2 | HOH A | 3 | 1.744  | 42.936 | 22.708 | H |
| ATOM | 679 | O  | HOH A | 1 | 1.717  | 42.974 | 43.866 | O |
| ATOM | 680 | H1 | HOH A | 2 | 0.907  | 42.520 | 43.553 | H |
| ATOM | 681 | H2 | HOH A | 3 | 1.712  | 42.960 | 44.846 | H |
| ATOM | 682 | O  | HOH A | 1 | 1.743  | 42.986 | 65.994 | O |
| ATOM | 683 | H1 | HOH A | 2 | 0.932  | 42.541 | 65.671 | H |
| ATOM | 684 | H2 | HOH A | 3 | 1.731  | 42.964 | 66.974 | H |
| ATOM | 685 | O  | HOH A | 1 | 24.333 | 42.984 | 21.770 | O |
| ATOM | 686 | H1 | HOH A | 2 | 23.526 | 42.527 | 21.454 | H |

|      |     |    |       |   |        |        |        |   |
|------|-----|----|-------|---|--------|--------|--------|---|
| ATOM | 687 | H2 | HOH A | 3 | 24.325 | 42.968 | 22.750 | H |
| ATOM | 688 | O  | HOH A | 1 | 24.342 | 42.944 | 43.856 | O |
| ATOM | 689 | H1 | HOH A | 2 | 23.530 | 42.496 | 43.539 | H |
| ATOM | 690 | H2 | HOH A | 3 | 24.329 | 42.936 | 44.836 | H |
| ATOM | 691 | O  | HOH A | 1 | 24.324 | 43.104 | 65.976 | O |
| ATOM | 692 | H1 | HOH A | 2 | 23.522 | 42.639 | 65.659 | H |
| ATOM | 693 | H2 | HOH A | 3 | 24.315 | 43.089 | 66.956 | H |
| ATOM | 694 | O  | HOH A | 1 | 46.981 | 43.015 | 21.670 | O |
| ATOM | 695 | H1 | HOH A | 2 | 46.168 | 42.569 | 21.353 | H |
| ATOM | 696 | H2 | HOH A | 3 | 46.972 | 43.001 | 22.650 | H |
| ATOM | 697 | O  | HOH A | 1 | 46.961 | 42.979 | 43.808 | O |
| ATOM | 698 | H1 | HOH A | 2 | 46.151 | 42.524 | 43.497 | H |
| ATOM | 699 | H2 | HOH A | 3 | 46.956 | 42.970 | 44.788 | H |
| ATOM | 700 | O  | HOH A | 1 | 46.929 | 43.157 | 65.917 | O |
| ATOM | 701 | H1 | HOH A | 2 | 46.116 | 42.708 | 65.604 | H |
| ATOM | 702 | H2 | HOH A | 3 | 46.923 | 43.147 | 66.897 | H |
| ATOM | 703 | O  | HOH A | 1 | 6.235  | 42.951 | 21.756 | O |
| ATOM | 704 | H1 | HOH A | 2 | 7.051  | 42.518 | 21.427 | H |
| ATOM | 705 | H2 | HOH A | 3 | 6.225  | 43.872 | 21.421 | H |
| ATOM | 706 | O  | HOH A | 1 | 6.208  | 42.999 | 43.909 | O |
| ATOM | 707 | H1 | HOH A | 2 | 7.024  | 42.564 | 43.586 | H |
| ATOM | 708 | H2 | HOH A | 3 | 6.209  | 43.924 | 43.583 | H |
| ATOM | 709 | O  | HOH A | 1 | 6.243  | 42.982 | 66.014 | O |
| ATOM | 710 | H1 | HOH A | 2 | 7.055  | 42.548 | 65.678 | H |
| ATOM | 711 | H2 | HOH A | 3 | 6.237  | 43.906 | 65.690 | H |
| ATOM | 712 | O  | HOH A | 1 | 28.838 | 43.045 | 21.765 | O |
| ATOM | 713 | H1 | HOH A | 2 | 29.652 | 42.615 | 21.428 | H |
| ATOM | 714 | H2 | HOH A | 3 | 28.829 | 43.971 | 21.443 | H |
| ATOM | 715 | O  | HOH A | 1 | 28.836 | 42.968 | 43.858 | O |
| ATOM | 716 | H1 | HOH A | 2 | 29.648 | 42.528 | 43.532 | H |
| ATOM | 717 | H2 | HOH A | 3 | 28.835 | 43.889 | 43.523 | H |
| ATOM | 718 | O  | HOH A | 1 | 28.829 | 43.163 | 65.984 | O |
| ATOM | 719 | H1 | HOH A | 2 | 29.645 | 42.735 | 65.649 | H |
| ATOM | 720 | H2 | HOH A | 3 | 28.817 | 44.087 | 65.659 | H |
| ATOM | 721 | O  | HOH A | 1 | 51.463 | 43.009 | 21.685 | O |
| ATOM | 722 | H1 | HOH A | 2 | 52.279 | 42.573 | 21.362 | H |



|      |     |    |       |   |        |        |        |   |
|------|-----|----|-------|---|--------|--------|--------|---|
| ATOM | 723 | H2 | HOH A | 3 | 51.461 | 43.931 | 21.355 | H |
| ATOM | 724 | O  | HOH A | 1 | 51.455 | 42.997 | 43.828 | O |
| ATOM | 725 | H1 | HOH A | 2 | 52.267 | 42.559 | 43.499 | H |
| ATOM | 726 | H2 | HOH A | 3 | 51.453 | 43.920 | 43.497 | H |
| ATOM | 727 | O  | HOH A | 1 | 51.429 | 43.131 | 65.948 | O |
| ATOM | 728 | H1 | HOH A | 2 | 52.245 | 42.702 | 65.615 | H |
| ATOM | 729 | H2 | HOH A | 3 | 51.417 | 44.054 | 65.619 | H |
| ATOM | 730 | O  | HOH A | 1 | 10.776 | 42.962 | 21.778 | O |
| ATOM | 731 | H1 | HOH A | 2 | 10.778 | 43.888 | 21.457 | H |
| ATOM | 732 | H2 | HOH A | 3 | 10.767 | 42.981 | 22.758 | H |
| ATOM | 733 | O  | HOH A | 1 | 10.747 | 43.000 | 43.905 | O |
| ATOM | 734 | H1 | HOH A | 2 | 10.740 | 43.929 | 43.593 | H |
| ATOM | 735 | H2 | HOH A | 3 | 10.752 | 43.010 | 44.885 | H |
| ATOM | 736 | O  | HOH A | 1 | 10.784 | 43.019 | 66.010 | O |
| ATOM | 737 | H1 | HOH A | 2 | 10.779 | 43.947 | 65.695 | H |
| ATOM | 738 | H2 | HOH A | 3 | 10.783 | 43.031 | 66.990 | H |
| ATOM | 739 | O  | HOH A | 1 | 33.390 | 43.054 | 21.755 | O |
| ATOM | 740 | H1 | HOH A | 2 | 33.377 | 43.981 | 21.437 | H |
| ATOM | 741 | H2 | HOH A | 3 | 33.388 | 43.071 | 22.735 | H |
| ATOM | 742 | O  | HOH A | 1 | 33.389 | 42.969 | 43.857 | O |
| ATOM | 743 | H1 | HOH A | 2 | 33.381 | 43.896 | 43.537 | H |
| ATOM | 744 | H2 | HOH A | 3 | 33.395 | 42.987 | 44.837 | H |
| ATOM | 745 | O  | HOH A | 1 | 33.381 | 43.212 | 65.972 | O |
| ATOM | 746 | H1 | HOH A | 2 | 33.375 | 44.140 | 65.656 | H |
| ATOM | 747 | H2 | HOH A | 3 | 33.378 | 43.226 | 66.952 | H |
| ATOM | 748 | O  | HOH A | 1 | 56.011 | 43.020 | 21.683 | O |
| ATOM | 749 | H1 | HOH A | 2 | 55.994 | 43.948 | 21.369 | H |
| ATOM | 750 | H2 | HOH A | 3 | 56.014 | 43.032 | 22.663 | H |
| ATOM | 751 | O  | HOH A | 1 | 55.981 | 43.019 | 43.847 | O |
| ATOM | 752 | H1 | HOH A | 2 | 55.968 | 43.946 | 43.529 | H |
| ATOM | 753 | H2 | HOH A | 3 | 55.980 | 43.036 | 44.827 | H |
| ATOM | 754 | O  | HOH A | 1 | 55.982 | 43.111 | 65.954 | O |
| ATOM | 755 | H1 | HOH A | 2 | 55.983 | 44.039 | 65.639 | H |
| ATOM | 756 | H2 | HOH A | 3 | 55.983 | 43.124 | 66.934 | H |
| ATOM | 757 | O  | HOH A | 1 | 15.280 | 43.028 | 21.784 | O |
| ATOM | 758 | H1 | HOH A | 2 | 14.470 | 42.577 | 21.466 | H |

|      |     |    |       |   |        |        |        |   |
|------|-----|----|-------|---|--------|--------|--------|---|
| ATOM | 759 | H2 | HOH A | 3 | 15.263 | 43.027 | 22.764 | H |
| ATOM | 760 | O  | HOH A | 1 | 15.269 | 43.028 | 43.909 | O |
| ATOM | 761 | H1 | HOH A | 2 | 14.458 | 42.578 | 43.590 | H |
| ATOM | 762 | H2 | HOH A | 3 | 15.253 | 43.021 | 44.889 | H |
| ATOM | 763 | O  | HOH A | 1 | 15.290 | 43.084 | 65.990 | O |
| ATOM | 764 | H1 | HOH A | 2 | 14.485 | 42.625 | 65.669 | H |
| ATOM | 765 | H2 | HOH A | 3 | 15.274 | 43.074 | 66.970 | H |
| ATOM | 766 | O  | HOH A | 1 | 37.904 | 43.108 | 21.723 | O |
| ATOM | 767 | H1 | HOH A | 2 | 37.096 | 42.653 | 21.406 | H |
| ATOM | 768 | H2 | HOH A | 3 | 37.892 | 43.099 | 22.703 | H |
| ATOM | 769 | O  | HOH A | 1 | 37.909 | 43.027 | 43.829 | O |
| ATOM | 770 | H1 | HOH A | 2 | 37.097 | 42.575 | 43.517 | H |
| ATOM | 771 | H2 | HOH A | 3 | 37.896 | 43.028 | 44.809 | H |
| ATOM | 772 | O  | HOH A | 1 | 37.891 | 43.253 | 65.976 | O |
| ATOM | 773 | H1 | HOH A | 2 | 37.083 | 42.801 | 65.656 | H |
| ATOM | 774 | H2 | HOH A | 3 | 37.872 | 43.249 | 66.955 | H |
| ATOM | 775 | O  | HOH A | 1 | 60.514 | 43.037 | 21.685 | O |
| ATOM | 776 | H1 | HOH A | 2 | 59.707 | 42.582 | 21.364 | H |
| ATOM | 777 | H2 | HOH A | 3 | 60.492 | 43.038 | 22.664 | H |
| ATOM | 778 | O  | HOH A | 1 | 60.494 | 43.057 | 43.843 | O |
| ATOM | 779 | H1 | HOH A | 2 | 59.683 | 42.608 | 43.524 | H |
| ATOM | 780 | H2 | HOH A | 3 | 60.479 | 43.050 | 44.823 | H |
| ATOM | 781 | O  | HOH A | 1 | 60.494 | 43.118 | 65.964 | O |
| ATOM | 782 | H1 | HOH A | 2 | 59.681 | 42.670 | 65.649 | H |
| ATOM | 783 | H2 | HOH A | 3 | 60.482 | 43.114 | 66.943 | H |
| ATOM | 784 | O  | HOH A | 1 | 19.786 | 42.989 | 21.783 | O |
| ATOM | 785 | H1 | HOH A | 2 | 20.575 | 42.513 | 21.448 | H |
| ATOM | 786 | H2 | HOH A | 3 | 18.989 | 42.517 | 21.463 | H |
| ATOM | 787 | O  | HOH A | 1 | 19.778 | 42.971 | 43.901 | O |
| ATOM | 788 | H1 | HOH A | 2 | 20.562 | 42.489 | 43.563 | H |
| ATOM | 789 | H2 | HOH A | 3 | 18.976 | 42.505 | 43.584 | H |
| ATOM | 790 | O  | HOH A | 1 | 19.790 | 43.063 | 65.995 | O |
| ATOM | 791 | H1 | HOH A | 2 | 20.579 | 42.594 | 65.652 | H |
| ATOM | 792 | H2 | HOH A | 3 | 18.994 | 42.586 | 65.681 | H |
| ATOM | 793 | O  | HOH A | 1 | 42.415 | 43.036 | 21.717 | O |
| ATOM | 794 | H1 | HOH A | 2 | 43.201 | 42.561 | 21.375 | H |

|      |     |    |       |   |        |        |        |   |
|------|-----|----|-------|---|--------|--------|--------|---|
| ATOM | 795 | H2 | HOH A | 3 | 41.616 | 42.567 | 21.399 | H |
| ATOM | 796 | O  | HOH A | 1 | 42.404 | 42.991 | 43.821 | O |
| ATOM | 797 | H1 | HOH A | 2 | 43.195 | 42.522 | 43.481 | H |
| ATOM | 798 | H2 | HOH A | 3 | 41.609 | 42.509 | 43.508 | H |
| ATOM | 799 | O  | HOH A | 1 | 42.386 | 43.194 | 65.948 | O |
| ATOM | 800 | H1 | HOH A | 2 | 43.170 | 42.708 | 65.615 | H |
| ATOM | 801 | H2 | HOH A | 3 | 41.584 | 42.728 | 65.630 | H |
| ATOM | 802 | O  | HOH A | 1 | 65.015 | 42.964 | 21.700 | O |
| ATOM | 803 | H1 | HOH A | 2 | 65.803 | 42.482 | 21.372 | H |
| ATOM | 804 | H2 | HOH A | 3 | 64.217 | 42.491 | 21.383 | H |
| ATOM | 805 | O  | HOH A | 1 | 64.978 | 43.007 | 43.869 | O |
| ATOM | 806 | H1 | HOH A | 2 | 65.768 | 42.529 | 43.540 | H |
| ATOM | 807 | H2 | HOH A | 3 | 64.182 | 42.533 | 43.548 | H |
| ATOM | 808 | O  | HOH A | 1 | 65.000 | 43.035 | 65.986 | O |
| ATOM | 809 | H1 | HOH A | 2 | 65.785 | 42.551 | 65.653 | H |
| ATOM | 810 | H2 | HOH A | 3 | 64.199 | 42.567 | 65.671 | H |
| ATOM | 811 | O  | HOH A | 1 | 1.756  | 45.575 | 20.816 | O |
| ATOM | 812 | H1 | HOH A | 2 | 1.751  | 44.652 | 21.145 | H |
| ATOM | 813 | H2 | HOH A | 3 | 1.746  | 45.548 | 19.837 | H |
| ATOM | 814 | O  | HOH A | 1 | 1.725  | 45.600 | 42.970 | O |
| ATOM | 815 | H1 | HOH A | 2 | 1.716  | 44.673 | 43.288 | H |
| ATOM | 816 | H2 | HOH A | 3 | 1.714  | 45.584 | 41.991 | H |
| ATOM | 817 | O  | HOH A | 1 | 1.754  | 45.619 | 65.084 | O |
| ATOM | 818 | H1 | HOH A | 2 | 1.741  | 44.693 | 65.404 | H |
| ATOM | 819 | H2 | HOH A | 3 | 1.744  | 45.601 | 64.104 | H |
| ATOM | 820 | O  | HOH A | 1 | 24.344 | 45.609 | 20.863 | O |
| ATOM | 821 | H1 | HOH A | 2 | 24.330 | 44.681 | 21.178 | H |
| ATOM | 822 | H2 | HOH A | 3 | 24.344 | 45.596 | 19.883 | H |
| ATOM | 823 | O  | HOH A | 1 | 24.329 | 45.575 | 42.953 | O |
| ATOM | 824 | H1 | HOH A | 2 | 24.329 | 44.646 | 43.265 | H |
| ATOM | 825 | H2 | HOH A | 3 | 24.322 | 45.566 | 41.973 | H |
| ATOM | 826 | O  | HOH A | 1 | 24.345 | 45.725 | 65.063 | O |
| ATOM | 827 | H1 | HOH A | 2 | 24.338 | 44.797 | 65.378 | H |
| ATOM | 828 | H2 | HOH A | 3 | 24.340 | 45.713 | 64.083 | H |
| ATOM | 829 | O  | HOH A | 1 | 46.962 | 45.651 | 20.765 | O |
| ATOM | 830 | H1 | HOH A | 2 | 46.962 | 44.722 | 21.079 | H |

|      |     |    |       |   |        |        |        |   |
|------|-----|----|-------|---|--------|--------|--------|---|
| ATOM | 831 | H2 | HOH A | 3 | 46.946 | 45.640 | 19.786 | H |
| ATOM | 832 | O  | HOH A | 1 | 46.979 | 45.599 | 42.892 | O |
| ATOM | 833 | H1 | HOH A | 2 | 46.965 | 44.676 | 43.221 | H |
| ATOM | 834 | H2 | HOH A | 3 | 46.974 | 45.572 | 41.912 | H |
| ATOM | 835 | O  | HOH A | 1 | 46.929 | 45.781 | 65.013 | O |
| ATOM | 836 | H1 | HOH A | 2 | 46.918 | 44.854 | 65.331 | H |
| ATOM | 837 | H2 | HOH A | 3 | 46.929 | 45.766 | 64.033 | H |
| ATOM | 838 | O  | HOH A | 1 | 6.251  | 45.556 | 20.835 | O |
| ATOM | 839 | H1 | HOH A | 2 | 5.458  | 46.036 | 21.153 | H |
| ATOM | 840 | H2 | HOH A | 3 | 6.241  | 45.569 | 19.855 | H |
| ATOM | 841 | O  | HOH A | 1 | 6.235  | 45.610 | 42.997 | O |
| ATOM | 842 | H1 | HOH A | 2 | 5.436  | 46.079 | 43.316 | H |
| ATOM | 843 | H2 | HOH A | 3 | 6.222  | 45.620 | 42.018 | H |
| ATOM | 844 | O  | HOH A | 1 | 6.256  | 45.603 | 65.100 | O |
| ATOM | 845 | H1 | HOH A | 2 | 5.462  | 46.071 | 65.432 | H |
| ATOM | 846 | H2 | HOH A | 3 | 6.231  | 45.620 | 64.121 | H |
| ATOM | 847 | O  | HOH A | 1 | 28.850 | 45.671 | 20.862 | O |
| ATOM | 848 | H1 | HOH A | 2 | 28.052 | 46.132 | 21.195 | H |
| ATOM | 849 | H2 | HOH A | 3 | 28.831 | 45.703 | 19.882 | H |
| ATOM | 850 | O  | HOH A | 1 | 28.853 | 45.576 | 42.953 | O |
| ATOM | 851 | H1 | HOH A | 2 | 28.055 | 46.043 | 43.278 | H |
| ATOM | 852 | H2 | HOH A | 3 | 28.834 | 45.590 | 41.973 | H |
| ATOM | 853 | O  | HOH A | 1 | 28.849 | 45.770 | 65.069 | O |
| ATOM | 854 | H1 | HOH A | 2 | 28.051 | 46.241 | 65.387 | H |
| ATOM | 855 | H2 | HOH A | 3 | 28.835 | 45.779 | 64.089 | H |
| ATOM | 856 | O  | HOH A | 1 | 51.477 | 45.628 | 20.765 | O |
| ATOM | 857 | H1 | HOH A | 2 | 50.685 | 46.100 | 21.096 | H |
| ATOM | 858 | H2 | HOH A | 3 | 51.457 | 45.653 | 19.786 | H |
| ATOM | 859 | O  | HOH A | 1 | 51.473 | 45.608 | 42.909 | O |
| ATOM | 860 | H1 | HOH A | 2 | 50.677 | 46.082 | 43.227 | H |
| ATOM | 861 | H2 | HOH A | 3 | 51.461 | 45.620 | 41.929 | H |
| ATOM | 862 | O  | HOH A | 1 | 51.429 | 45.743 | 65.035 | O |
| ATOM | 863 | H1 | HOH A | 2 | 50.636 | 46.217 | 65.362 | H |
| ATOM | 864 | H2 | HOH A | 3 | 51.419 | 45.775 | 64.056 | H |
| ATOM | 865 | O  | HOH A | 1 | 10.778 | 45.584 | 20.865 | O |
| ATOM | 866 | H1 | HOH A | 2 | 9.962  | 46.019 | 21.190 | H |

|      |     |    |       |   |        |        |        |   |
|------|-----|----|-------|---|--------|--------|--------|---|
| ATOM | 867 | H2 | HOH A | 3 | 10.768 | 45.617 | 19.885 | H |
| ATOM | 868 | O  | HOH A | 1 | 10.735 | 45.616 | 43.016 | O |
| ATOM | 869 | H1 | HOH A | 2 | 9.926  | 46.067 | 43.338 | H |
| ATOM | 870 | H2 | HOH A | 3 | 10.722 | 45.637 | 42.036 | H |
| ATOM | 871 | O  | HOH A | 1 | 10.779 | 45.637 | 65.116 | O |
| ATOM | 872 | H1 | HOH A | 2 | 9.966  | 46.074 | 65.446 | H |
| ATOM | 873 | H2 | HOH A | 3 | 10.762 | 45.667 | 64.136 | H |
| ATOM | 874 | O  | HOH A | 1 | 33.364 | 45.673 | 20.861 | O |
| ATOM | 875 | H1 | HOH A | 2 | 32.555 | 46.113 | 21.194 | H |
| ATOM | 876 | H2 | HOH A | 3 | 33.347 | 45.709 | 19.881 | H |
| ATOM | 877 | O  | HOH A | 1 | 33.374 | 45.586 | 42.961 | O |
| ATOM | 878 | H1 | HOH A | 2 | 32.562 | 46.029 | 43.286 | H |
| ATOM | 879 | H2 | HOH A | 3 | 33.358 | 45.605 | 41.982 | H |
| ATOM | 880 | O  | HOH A | 1 | 33.375 | 45.825 | 65.076 | O |
| ATOM | 881 | H1 | HOH A | 2 | 32.560 | 46.262 | 65.399 | H |
| ATOM | 882 | H2 | HOH A | 3 | 33.363 | 45.849 | 64.096 | H |
| ATOM | 883 | O  | HOH A | 1 | 55.986 | 45.629 | 20.795 | O |
| ATOM | 884 | H1 | HOH A | 2 | 55.172 | 46.066 | 21.123 | H |
| ATOM | 885 | H2 | HOH A | 3 | 55.968 | 45.653 | 19.815 | H |
| ATOM | 886 | O  | HOH A | 1 | 55.980 | 45.635 | 42.945 | O |
| ATOM | 887 | H1 | HOH A | 2 | 55.171 | 46.086 | 43.265 | H |
| ATOM | 888 | H2 | HOH A | 3 | 55.972 | 45.657 | 41.965 | H |
| ATOM | 889 | O  | HOH A | 1 | 55.950 | 45.734 | 65.062 | O |
| ATOM | 890 | H1 | HOH A | 2 | 55.137 | 46.175 | 65.384 | H |
| ATOM | 891 | H2 | HOH A | 3 | 55.943 | 45.764 | 64.082 | H |
| ATOM | 892 | O  | HOH A | 1 | 15.275 | 45.629 | 20.833 | O |
| ATOM | 893 | H1 | HOH A | 2 | 15.286 | 44.714 | 21.185 | H |
| ATOM | 894 | H2 | HOH A | 3 | 16.086 | 46.083 | 21.145 | H |
| ATOM | 895 | O  | HOH A | 1 | 15.261 | 45.633 | 42.975 | O |
| ATOM | 896 | H1 | HOH A | 2 | 15.265 | 44.717 | 43.323 | H |
| ATOM | 897 | H2 | HOH A | 3 | 16.076 | 46.079 | 43.286 | H |
| ATOM | 898 | O  | HOH A | 1 | 15.287 | 45.691 | 65.056 | O |
| ATOM | 899 | H1 | HOH A | 2 | 15.296 | 44.775 | 65.405 | H |
| ATOM | 900 | H2 | HOH A | 3 | 16.097 | 46.143 | 65.371 | H |
| ATOM | 901 | O  | HOH A | 1 | 37.887 | 45.718 | 20.797 | O |
| ATOM | 902 | H1 | HOH A | 2 | 37.891 | 44.800 | 21.140 | H |

|      |     |    |       |   |        |        |        |   |
|------|-----|----|-------|---|--------|--------|--------|---|
| ATOM | 903 | H2 | HOH A | 3 | 38.699 | 46.164 | 21.119 | H |
| ATOM | 904 | O  | HOH A | 1 | 37.895 | 45.635 | 42.899 | O |
| ATOM | 905 | H1 | HOH A | 2 | 37.900 | 44.717 | 43.242 | H |
| ATOM | 906 | H2 | HOH A | 3 | 38.706 | 46.083 | 43.219 | H |
| ATOM | 907 | O  | HOH A | 1 | 37.878 | 45.860 | 65.033 | O |
| ATOM | 908 | H1 | HOH A | 2 | 37.889 | 44.945 | 65.384 | H |
| ATOM | 909 | H2 | HOH A | 3 | 38.691 | 46.312 | 65.342 | H |
| ATOM | 910 | O  | HOH A | 1 | 60.487 | 45.644 | 20.762 | O |
| ATOM | 911 | H1 | HOH A | 2 | 60.493 | 44.725 | 21.104 | H |
| ATOM | 912 | H2 | HOH A | 3 | 61.299 | 46.091 | 21.081 | H |
| ATOM | 913 | O  | HOH A | 1 | 60.482 | 45.658 | 42.916 | O |
| ATOM | 914 | H1 | HOH A | 2 | 60.485 | 44.741 | 43.261 | H |
| ATOM | 915 | H2 | HOH A | 3 | 61.295 | 46.104 | 43.234 | H |
| ATOM | 916 | O  | HOH A | 1 | 60.468 | 45.724 | 65.037 | O |
| ATOM | 917 | H1 | HOH A | 2 | 60.475 | 44.805 | 65.379 | H |
| ATOM | 918 | H2 | HOH A | 3 | 61.283 | 46.169 | 65.351 | H |
| ATOM | 919 | O  | HOH A | 1 | 19.807 | 45.580 | 20.842 | O |
| ATOM | 920 | H1 | HOH A | 2 | 19.822 | 44.656 | 21.168 | H |
| ATOM | 921 | H2 | HOH A | 3 | 20.612 | 46.031 | 21.173 | H |
| ATOM | 922 | O  | HOH A | 1 | 19.801 | 45.571 | 42.959 | O |
| ATOM | 923 | H1 | HOH A | 2 | 19.819 | 44.645 | 43.280 | H |
| ATOM | 924 | H2 | HOH A | 3 | 20.603 | 46.023 | 43.294 | H |
| ATOM | 925 | O  | HOH A | 1 | 19.827 | 45.653 | 65.047 | O |
| ATOM | 926 | H1 | HOH A | 2 | 19.841 | 44.731 | 65.379 | H |
| ATOM | 927 | H2 | HOH A | 3 | 20.630 | 46.106 | 65.380 | H |
| ATOM | 928 | O  | HOH A | 1 | 42.433 | 45.641 | 20.787 | O |
| ATOM | 929 | H1 | HOH A | 2 | 42.444 | 44.713 | 21.103 | H |
| ATOM | 930 | H2 | HOH A | 3 | 43.244 | 46.083 | 21.118 | H |
| ATOM | 931 | O  | HOH A | 1 | 42.435 | 45.582 | 42.882 | O |
| ATOM | 932 | H1 | HOH A | 2 | 42.442 | 44.657 | 43.206 | H |
| ATOM | 933 | H2 | HOH A | 3 | 43.246 | 46.023 | 43.210 | H |
| ATOM | 934 | O  | HOH A | 1 | 42.414 | 45.790 | 64.997 | O |
| ATOM | 935 | H1 | HOH A | 2 | 42.423 | 44.865 | 65.323 | H |
| ATOM | 936 | H2 | HOH A | 3 | 43.220 | 46.236 | 65.331 | H |
| ATOM | 937 | O  | HOH A | 1 | 65.026 | 45.564 | 20.761 | O |
| ATOM | 938 | H1 | HOH A | 2 | 65.039 | 44.639 | 21.086 | H |

|      |     |    |       |   |        |        |        |   |
|------|-----|----|-------|---|--------|--------|--------|---|
| ATOM | 939 | H2 | HOH A | 3 | 65.828 | 46.014 | 21.099 | H |
| ATOM | 940 | O  | HOH A | 1 | 65.009 | 45.604 | 42.921 | O |
| ATOM | 941 | H1 | HOH A | 2 | 65.017 | 44.679 | 43.246 | H |
| ATOM | 942 | H2 | HOH A | 3 | 65.815 | 46.049 | 43.256 | H |
| ATOM | 943 | O  | HOH A | 1 | 65.016 | 45.628 | 65.044 | O |
| ATOM | 944 | H1 | HOH A | 2 | 65.027 | 44.703 | 65.368 | H |
| ATOM | 945 | H2 | HOH A | 3 | 65.828 | 46.072 | 65.369 | H |
| ATOM | 946 | O  | HOH A | 1 | 22.076 | 26.046 | 20.862 | O |
| ATOM | 947 | H1 | HOH A | 2 | 22.096 | 25.125 | 21.198 | H |
| ATOM | 948 | H2 | HOH A | 3 | 22.877 | 26.505 | 21.190 | H |
| ATOM | 949 | O  | HOH A | 1 | 22.068 | 26.028 | 42.971 | O |
| ATOM | 950 | H1 | HOH A | 2 | 22.094 | 25.107 | 43.306 | H |
| ATOM | 951 | H2 | HOH A | 3 | 22.867 | 26.492 | 43.298 | H |
| ATOM | 952 | O  | HOH A | 1 | 22.092 | 26.151 | 65.069 | O |
| ATOM | 953 | H1 | HOH A | 2 | 22.107 | 25.231 | 65.406 | H |
| ATOM | 954 | H2 | HOH A | 3 | 22.892 | 26.609 | 65.402 | H |
| ATOM | 955 | O  | HOH A | 1 | 44.708 | 26.093 | 20.782 | O |
| ATOM | 956 | H1 | HOH A | 2 | 44.726 | 25.174 | 21.121 | H |
| ATOM | 957 | H2 | HOH A | 3 | 45.511 | 26.551 | 21.108 | H |
| ATOM | 958 | O  | HOH A | 1 | 44.718 | 26.031 | 42.905 | O |
| ATOM | 959 | H1 | HOH A | 2 | 44.740 | 25.112 | 43.245 | H |
| ATOM | 960 | H2 | HOH A | 3 | 45.516 | 26.494 | 43.233 | H |
| ATOM | 961 | O  | HOH A | 1 | 44.671 | 26.242 | 65.022 | O |
| ATOM | 962 | H1 | HOH A | 2 | 44.692 | 25.324 | 65.363 | H |
| ATOM | 963 | H2 | HOH A | 3 | 45.470 | 26.706 | 65.349 | H |
| ATOM | 964 | O  | HOH A | 1 | 67.295 | 26.024 | 20.810 | O |
| ATOM | 965 | H1 | HOH A | 2 | 67.312 | 25.104 | 21.147 | H |
| ATOM | 966 | H2 | HOH A | 3 | 68.092 | 26.484 | 21.148 | H |
| ATOM | 967 | O  | HOH A | 1 | 67.270 | 26.053 | 42.953 | O |
| ATOM | 968 | H1 | HOH A | 2 | 67.292 | 25.132 | 43.287 | H |
| ATOM | 969 | H2 | HOH A | 3 | 68.069 | 26.514 | 43.283 | H |
| ATOM | 970 | O  | HOH A | 1 | 67.277 | 26.077 | 65.065 | O |
| ATOM | 971 | H1 | HOH A | 2 | 67.299 | 25.157 | 65.403 | H |
| ATOM | 972 | H2 | HOH A | 3 | 68.078 | 26.538 | 65.389 | H |
| ATOM | 973 | O  | HOH A | 1 | 3.996  | 26.047 | 20.820 | O |
| ATOM | 974 | H1 | HOH A | 2 | 3.991  | 25.120 | 21.138 | H |

|      |      |    |       |   |        |        |        |   |
|------|------|----|-------|---|--------|--------|--------|---|
| ATOM | 975  | H2 | HOH A | 3 | 4.001  | 26.031 | 19.841 | H |
| ATOM | 976  | O  | HOH A | 1 | 3.962  | 26.073 | 42.997 | O |
| ATOM | 977  | H1 | HOH A | 2 | 3.959  | 25.144 | 43.307 | H |
| ATOM | 978  | H2 | HOH A | 3 | 3.972  | 26.066 | 42.017 | H |
| ATOM | 979  | O  | HOH A | 1 | 3.997  | 26.074 | 65.089 | O |
| ATOM | 980  | H1 | HOH A | 2 | 3.988  | 25.143 | 65.392 | H |
| ATOM | 981  | H2 | HOH A | 3 | 4.009  | 26.074 | 64.109 | H |
| ATOM | 982  | O  | HOH A | 1 | 26.583 | 26.100 | 20.872 | O |
| ATOM | 983  | H1 | HOH A | 2 | 26.585 | 25.170 | 21.179 | H |
| ATOM | 984  | H2 | HOH A | 3 | 26.592 | 26.096 | 19.892 | H |
| ATOM | 985  | O  | HOH A | 1 | 26.586 | 26.055 | 42.970 | O |
| ATOM | 986  | H1 | HOH A | 2 | 26.582 | 25.126 | 43.283 | H |
| ATOM | 987  | H2 | HOH A | 3 | 26.597 | 26.044 | 41.991 | H |
| ATOM | 988  | O  | HOH A | 1 | 26.593 | 26.211 | 65.074 | O |
| ATOM | 989  | H1 | HOH A | 2 | 26.589 | 25.283 | 65.388 | H |
| ATOM | 990  | H2 | HOH A | 3 | 26.597 | 26.199 | 64.094 | H |
| ATOM | 991  | O  | HOH A | 1 | 49.214 | 26.114 | 20.775 | O |
| ATOM | 992  | H1 | HOH A | 2 | 49.207 | 25.184 | 21.081 | H |
| ATOM | 993  | H2 | HOH A | 3 | 49.226 | 26.111 | 19.795 | H |
| ATOM | 994  | O  | HOH A | 1 | 49.225 | 26.074 | 42.926 | O |
| ATOM | 995  | H1 | HOH A | 2 | 49.221 | 25.147 | 43.244 | H |
| ATOM | 996  | H2 | HOH A | 3 | 49.234 | 26.059 | 41.947 | H |
| ATOM | 997  | O  | HOH A | 1 | 49.167 | 26.242 | 65.037 | O |
| ATOM | 998  | H1 | HOH A | 2 | 49.154 | 25.314 | 65.350 | H |
| ATOM | 999  | H2 | HOH A | 3 | 49.183 | 26.231 | 64.057 | H |
| ATOM | 1000 | O  | HOH A | 1 | 8.516  | 25.993 | 20.852 | O |
| ATOM | 1001 | H1 | HOH A | 2 | 8.520  | 25.076 | 21.199 | H |
| ATOM | 1002 | H2 | HOH A | 3 | 9.323  | 26.444 | 21.179 | H |
| ATOM | 1003 | O  | HOH A | 1 | 8.478  | 26.042 | 43.012 | O |
| ATOM | 1004 | H1 | HOH A | 2 | 8.486  | 25.124 | 43.354 | H |
| ATOM | 1005 | H2 | HOH A | 3 | 9.288  | 26.491 | 43.332 | H |
| ATOM | 1006 | O  | HOH A | 1 | 8.514  | 26.053 | 65.106 | O |
| ATOM | 1007 | H1 | HOH A | 2 | 8.522  | 25.135 | 65.448 | H |
| ATOM | 1008 | H2 | HOH A | 3 | 9.324  | 26.503 | 65.426 | H |
| ATOM | 1009 | O  | HOH A | 1 | 31.113 | 26.110 | 20.873 | O |
| ATOM | 1010 | H1 | HOH A | 2 | 31.123 | 25.192 | 21.215 | H |



|      |      |    |       |   |        |        |        |   |
|------|------|----|-------|---|--------|--------|--------|---|
| ATOM | 1011 | H2 | HOH A | 3 | 31.924 | 26.560 | 21.189 | H |
| ATOM | 1012 | O  | HOH A | 1 | 31.111 | 26.025 | 42.967 | O |
| ATOM | 1013 | H1 | HOH A | 2 | 31.113 | 25.106 | 43.306 | H |
| ATOM | 1014 | H2 | HOH A | 3 | 31.926 | 26.467 | 43.283 | H |
| ATOM | 1015 | O  | HOH A | 1 | 31.111 | 26.225 | 65.079 | O |
| ATOM | 1016 | H1 | HOH A | 2 | 31.125 | 25.307 | 65.420 | H |
| ATOM | 1017 | H2 | HOH A | 3 | 31.915 | 26.682 | 65.405 | H |
| ATOM | 1018 | O  | HOH A | 1 | 53.718 | 26.057 | 20.802 | O |
| ATOM | 1019 | H1 | HOH A | 2 | 53.728 | 25.138 | 21.142 | H |
| ATOM | 1020 | H2 | HOH A | 3 | 54.528 | 26.507 | 21.122 | H |
| ATOM | 1021 | O  | HOH A | 1 | 53.722 | 26.055 | 42.927 | O |
| ATOM | 1022 | H1 | HOH A | 2 | 53.722 | 25.140 | 43.279 | H |
| ATOM | 1023 | H2 | HOH A | 3 | 54.532 | 26.503 | 43.249 | H |
| ATOM | 1024 | O  | HOH A | 1 | 53.689 | 26.162 | 65.058 | O |
| ATOM | 1025 | H1 | HOH A | 2 | 53.694 | 25.243 | 65.397 | H |
| ATOM | 1026 | H2 | HOH A | 3 | 54.501 | 26.607 | 65.378 | H |
| ATOM | 1027 | O  | HOH A | 1 | 13.031 | 26.037 | 20.814 | O |
| ATOM | 1028 | H1 | HOH A | 2 | 13.030 | 25.117 | 21.152 | H |
| ATOM | 1029 | H2 | HOH A | 3 | 13.839 | 26.481 | 21.144 | H |
| ATOM | 1030 | O  | HOH A | 1 | 12.994 | 26.048 | 42.946 | O |
| ATOM | 1031 | H1 | HOH A | 2 | 13.005 | 25.127 | 43.280 | H |
| ATOM | 1032 | H2 | HOH A | 3 | 13.802 | 26.498 | 43.272 | H |
| ATOM | 1033 | O  | HOH A | 1 | 13.043 | 26.081 | 65.029 | O |
| ATOM | 1034 | H1 | HOH A | 2 | 13.044 | 25.160 | 65.364 | H |
| ATOM | 1035 | H2 | HOH A | 3 | 13.848 | 26.527 | 65.365 | H |
| ATOM | 1036 | O  | HOH A | 1 | 35.640 | 26.113 | 20.776 | O |
| ATOM | 1037 | H1 | HOH A | 2 | 35.634 | 25.194 | 21.117 | H |
| ATOM | 1038 | H2 | HOH A | 3 | 36.451 | 26.553 | 21.107 | H |
| ATOM | 1039 | O  | HOH A | 1 | 35.644 | 26.036 | 42.895 | O |
| ATOM | 1040 | H1 | HOH A | 2 | 35.645 | 25.115 | 43.230 | H |
| ATOM | 1041 | H2 | HOH A | 3 | 36.455 | 26.478 | 43.222 | H |
| ATOM | 1042 | O  | HOH A | 1 | 35.627 | 26.265 | 65.016 | O |
| ATOM | 1043 | H1 | HOH A | 2 | 35.632 | 25.345 | 65.353 | H |
| ATOM | 1044 | H2 | HOH A | 3 | 36.434 | 26.713 | 65.345 | H |
| ATOM | 1045 | O  | HOH A | 1 | 58.237 | 26.066 | 20.724 | O |
| ATOM | 1046 | H1 | HOH A | 2 | 58.239 | 25.147 | 21.064 | H |

|      |      |    |       |   |        |        |        |   |
|------|------|----|-------|---|--------|--------|--------|---|
| ATOM | 1047 | H2 | HOH A | 3 | 59.044 | 26.513 | 21.054 | H |
| ATOM | 1048 | O  | HOH A | 1 | 58.228 | 26.075 | 42.891 | O |
| ATOM | 1049 | H1 | HOH A | 2 | 58.235 | 25.155 | 43.230 | H |
| ATOM | 1050 | H2 | HOH A | 3 | 59.035 | 26.524 | 43.217 | H |
| ATOM | 1051 | O  | HOH A | 1 | 58.213 | 26.144 | 65.011 | O |
| ATOM | 1052 | H1 | HOH A | 2 | 58.211 | 25.224 | 65.348 | H |
| ATOM | 1053 | H2 | HOH A | 3 | 59.024 | 26.586 | 65.340 | H |
| ATOM | 1054 | O  | HOH A | 1 | 17.569 | 26.024 | 20.839 | O |
| ATOM | 1055 | H1 | HOH A | 2 | 18.370 | 26.492 | 21.154 | H |
| ATOM | 1056 | H2 | HOH A | 3 | 17.578 | 26.033 | 19.859 | H |
| ATOM | 1057 | O  | HOH A | 1 | 17.533 | 26.008 | 42.973 | O |
| ATOM | 1058 | H1 | HOH A | 2 | 18.335 | 26.477 | 43.284 | H |
| ATOM | 1059 | H2 | HOH A | 3 | 17.538 | 26.017 | 41.993 | H |
| ATOM | 1060 | O  | HOH A | 1 | 17.583 | 26.088 | 65.059 | O |
| ATOM | 1061 | H1 | HOH A | 2 | 18.383 | 26.561 | 65.369 | H |
| ATOM | 1062 | H2 | HOH A | 3 | 17.589 | 26.093 | 64.079 | H |
| ATOM | 1063 | O  | HOH A | 1 | 40.188 | 26.094 | 20.788 | O |
| ATOM | 1064 | H1 | HOH A | 2 | 40.993 | 26.557 | 21.102 | H |
| ATOM | 1065 | H2 | HOH A | 3 | 40.195 | 26.105 | 19.808 | H |
| ATOM | 1066 | O  | HOH A | 1 | 40.184 | 26.014 | 42.907 | O |
| ATOM | 1067 | H1 | HOH A | 2 | 40.987 | 26.482 | 43.217 | H |
| ATOM | 1068 | H2 | HOH A | 3 | 40.194 | 26.013 | 41.927 | H |
| ATOM | 1069 | O  | HOH A | 1 | 40.156 | 26.235 | 65.019 | O |
| ATOM | 1070 | H1 | HOH A | 2 | 40.957 | 26.709 | 65.329 | H |
| ATOM | 1071 | H2 | HOH A | 3 | 40.165 | 26.235 | 64.039 | H |
| ATOM | 1072 | O  | HOH A | 1 | 62.769 | 25.999 | 20.761 | O |
| ATOM | 1073 | H1 | HOH A | 2 | 63.572 | 26.462 | 21.082 | H |
| ATOM | 1074 | H2 | HOH A | 3 | 62.785 | 26.009 | 19.781 | H |
| ATOM | 1075 | O  | HOH A | 1 | 62.755 | 26.038 | 42.935 | O |
| ATOM | 1076 | H1 | HOH A | 2 | 63.558 | 26.499 | 43.254 | H |
| ATOM | 1077 | H2 | HOH A | 3 | 62.765 | 26.054 | 41.955 | H |
| ATOM | 1078 | O  | HOH A | 1 | 62.768 | 26.083 | 65.052 | O |
| ATOM | 1079 | H1 | HOH A | 2 | 63.570 | 26.549 | 65.367 | H |
| ATOM | 1080 | H2 | HOH A | 3 | 62.776 | 26.096 | 64.072 | H |
| ATOM | 1081 | O  | HOH A | 1 | 1.776  | 29.977 | 20.808 | O |
| ATOM | 1082 | H1 | HOH A | 2 | 1.755  | 29.054 | 21.136 | H |

|      |      |    |       |   |        |        |        |   |
|------|------|----|-------|---|--------|--------|--------|---|
| ATOM | 1083 | H2 | HOH A | 3 | 0.969  | 30.431 | 21.126 | H |
| ATOM | 1084 | O  | HOH A | 1 | 1.754  | 30.014 | 42.960 | O |
| ATOM | 1085 | H1 | HOH A | 2 | 1.725  | 29.095 | 43.300 | H |
| ATOM | 1086 | H2 | HOH A | 3 | 0.952  | 30.480 | 43.277 | H |
| ATOM | 1087 | O  | HOH A | 1 | 1.781  | 30.021 | 65.067 | O |
| ATOM | 1088 | H1 | HOH A | 2 | 1.758  | 29.097 | 65.393 | H |
| ATOM | 1089 | H2 | HOH A | 3 | 0.976  | 30.477 | 65.389 | H |
| ATOM | 1090 | O  | HOH A | 1 | 24.379 | 30.025 | 20.865 | O |
| ATOM | 1091 | H1 | HOH A | 2 | 24.350 | 29.098 | 21.181 | H |
| ATOM | 1092 | H2 | HOH A | 3 | 23.573 | 30.481 | 21.187 | H |
| ATOM | 1093 | O  | HOH A | 1 | 24.368 | 30.004 | 42.970 | O |
| ATOM | 1094 | H1 | HOH A | 2 | 24.340 | 29.081 | 43.298 | H |
| ATOM | 1095 | H2 | HOH A | 3 | 23.568 | 30.467 | 43.297 | H |
| ATOM | 1096 | O  | HOH A | 1 | 24.383 | 30.139 | 65.082 | O |
| ATOM | 1097 | H1 | HOH A | 2 | 24.358 | 29.216 | 65.410 | H |
| ATOM | 1098 | H2 | HOH A | 3 | 23.574 | 30.594 | 65.395 | H |
| ATOM | 1099 | O  | HOH A | 1 | 46.996 | 30.060 | 20.766 | O |
| ATOM | 1100 | H1 | HOH A | 2 | 46.970 | 29.135 | 21.090 | H |
| ATOM | 1101 | H2 | HOH A | 3 | 46.194 | 30.518 | 21.094 | H |
| ATOM | 1102 | O  | HOH A | 1 | 47.013 | 30.008 | 42.910 | O |
| ATOM | 1103 | H1 | HOH A | 2 | 46.987 | 29.084 | 43.235 | H |
| ATOM | 1104 | H2 | HOH A | 3 | 46.210 | 30.466 | 43.234 | H |
| ATOM | 1105 | O  | HOH A | 1 | 46.955 | 30.205 | 65.022 | O |
| ATOM | 1106 | H1 | HOH A | 2 | 46.929 | 29.282 | 65.351 | H |
| ATOM | 1107 | H2 | HOH A | 3 | 46.150 | 30.663 | 65.343 | H |
| ATOM | 1108 | O  | HOH A | 1 | 6.283  | 29.933 | 20.834 | O |
| ATOM | 1109 | H1 | HOH A | 2 | 6.294  | 29.014 | 21.175 | H |
| ATOM | 1110 | H2 | HOH A | 3 | 7.085  | 30.389 | 21.165 | H |
| ATOM | 1111 | O  | HOH A | 1 | 6.247  | 29.966 | 42.990 | O |
| ATOM | 1112 | H1 | HOH A | 2 | 6.258  | 29.047 | 43.331 | H |
| ATOM | 1113 | H2 | HOH A | 3 | 7.054  | 30.419 | 43.312 | H |
| ATOM | 1114 | O  | HOH A | 1 | 6.290  | 29.970 | 65.095 | O |
| ATOM | 1115 | H1 | HOH A | 2 | 6.301  | 29.053 | 65.441 | H |
| ATOM | 1116 | H2 | HOH A | 3 | 7.096  | 30.424 | 65.417 | H |
| ATOM | 1117 | O  | HOH A | 1 | 28.884 | 30.010 | 20.867 | O |
| ATOM | 1118 | H1 | HOH A | 2 | 28.888 | 29.093 | 21.213 | H |

|      |      |    |       |   |        |        |        |   |
|------|------|----|-------|---|--------|--------|--------|---|
| ATOM | 1119 | H2 | HOH A | 3 | 29.688 | 30.462 | 21.199 | H |
| ATOM | 1120 | O  | HOH A | 1 | 28.882 | 29.946 | 42.983 | O |
| ATOM | 1121 | H1 | HOH A | 2 | 28.889 | 29.027 | 43.322 | H |
| ATOM | 1122 | H2 | HOH A | 3 | 29.690 | 30.395 | 43.307 | H |
| ATOM | 1123 | O  | HOH A | 1 | 28.888 | 30.143 | 65.080 | O |
| ATOM | 1124 | H1 | HOH A | 2 | 28.896 | 29.225 | 65.422 | H |
| ATOM | 1125 | H2 | HOH A | 3 | 29.694 | 30.596 | 65.405 | H |
| ATOM | 1126 | O  | HOH A | 1 | 51.506 | 29.996 | 20.780 | O |
| ATOM | 1127 | H1 | HOH A | 2 | 51.515 | 29.077 | 21.121 | H |
| ATOM | 1128 | H2 | HOH A | 3 | 52.312 | 30.447 | 21.107 | H |
| ATOM | 1129 | O  | HOH A | 1 | 51.518 | 29.989 | 42.910 | O |
| ATOM | 1130 | H1 | HOH A | 2 | 51.523 | 29.070 | 43.251 | H |
| ATOM | 1131 | H2 | HOH A | 3 | 52.323 | 30.439 | 43.240 | H |
| ATOM | 1132 | O  | HOH A | 1 | 51.473 | 30.125 | 65.036 | O |
| ATOM | 1133 | H1 | HOH A | 2 | 51.479 | 29.205 | 65.373 | H |
| ATOM | 1134 | H2 | HOH A | 3 | 52.278 | 30.574 | 65.368 | H |
| ATOM | 1135 | O  | HOH A | 1 | 10.798 | 29.945 | 20.872 | O |
| ATOM | 1136 | H1 | HOH A | 2 | 10.801 | 29.014 | 21.175 | H |
| ATOM | 1137 | H2 | HOH A | 3 | 10.790 | 29.945 | 19.892 | H |
| ATOM | 1138 | O  | HOH A | 1 | 10.777 | 29.977 | 43.002 | O |
| ATOM | 1139 | H1 | HOH A | 2 | 10.772 | 29.049 | 43.316 | H |
| ATOM | 1140 | H2 | HOH A | 3 | 10.770 | 29.966 | 42.022 | H |
| ATOM | 1141 | O  | HOH A | 1 | 10.810 | 29.989 | 65.096 | O |
| ATOM | 1142 | H1 | HOH A | 2 | 10.814 | 29.057 | 65.400 | H |
| ATOM | 1143 | H2 | HOH A | 3 | 10.798 | 29.988 | 64.116 | H |
| ATOM | 1144 | O  | HOH A | 1 | 33.416 | 30.035 | 20.849 | O |
| ATOM | 1145 | H1 | HOH A | 2 | 33.428 | 29.105 | 21.157 | H |
| ATOM | 1146 | H2 | HOH A | 3 | 33.393 | 30.030 | 19.870 | H |
| ATOM | 1147 | O  | HOH A | 1 | 33.417 | 29.943 | 42.961 | O |
| ATOM | 1148 | H1 | HOH A | 2 | 33.420 | 29.013 | 43.270 | H |
| ATOM | 1149 | H2 | HOH A | 3 | 33.405 | 29.936 | 41.981 | H |
| ATOM | 1150 | O  | HOH A | 1 | 33.408 | 30.174 | 65.066 | O |
| ATOM | 1151 | H1 | HOH A | 2 | 33.411 | 29.242 | 65.370 | H |
| ATOM | 1152 | H2 | HOH A | 3 | 33.401 | 30.172 | 64.086 | H |
| ATOM | 1153 | O  | HOH A | 1 | 56.027 | 29.989 | 20.777 | O |
| ATOM | 1154 | H1 | HOH A | 2 | 56.027 | 29.057 | 21.081 | H |

|      |      |    |       |   |        |        |        |   |
|------|------|----|-------|---|--------|--------|--------|---|
| ATOM | 1155 | H2 | HOH A | 3 | 56.012 | 29.988 | 19.797 | H |
| ATOM | 1156 | O  | HOH A | 1 | 56.020 | 29.986 | 42.938 | O |
| ATOM | 1157 | H1 | HOH A | 2 | 56.015 | 29.059 | 43.255 | H |
| ATOM | 1158 | H2 | HOH A | 3 | 56.006 | 29.971 | 41.958 | H |
| ATOM | 1159 | O  | HOH A | 1 | 55.987 | 30.079 | 65.050 | O |
| ATOM | 1160 | H1 | HOH A | 2 | 55.985 | 29.149 | 65.361 | H |
| ATOM | 1161 | H2 | HOH A | 3 | 55.976 | 30.071 | 64.071 | H |
| ATOM | 1162 | O  | HOH A | 1 | 15.328 | 29.954 | 20.853 | O |
| ATOM | 1163 | H1 | HOH A | 2 | 15.310 | 29.024 | 21.162 | H |
| ATOM | 1164 | H2 | HOH A | 3 | 14.526 | 30.402 | 21.194 | H |
| ATOM | 1165 | O  | HOH A | 1 | 15.294 | 29.968 | 42.977 | O |
| ATOM | 1166 | H1 | HOH A | 2 | 15.273 | 29.039 | 43.288 | H |
| ATOM | 1167 | H2 | HOH A | 3 | 14.492 | 30.419 | 43.315 | H |
| ATOM | 1168 | O  | HOH A | 1 | 15.332 | 30.020 | 65.064 | O |
| ATOM | 1169 | H1 | HOH A | 2 | 15.316 | 29.090 | 65.374 | H |
| ATOM | 1170 | H2 | HOH A | 3 | 14.528 | 30.466 | 65.403 | H |
| ATOM | 1171 | O  | HOH A | 1 | 37.939 | 30.041 | 20.813 | O |
| ATOM | 1172 | H1 | HOH A | 2 | 37.922 | 29.114 | 21.130 | H |
| ATOM | 1173 | H2 | HOH A | 3 | 37.136 | 30.491 | 21.150 | H |
| ATOM | 1174 | O  | HOH A | 1 | 37.951 | 29.962 | 42.912 | O |
| ATOM | 1175 | H1 | HOH A | 2 | 37.925 | 29.034 | 43.226 | H |
| ATOM | 1176 | H2 | HOH A | 3 | 37.146 | 30.415 | 43.241 | H |
| ATOM | 1177 | O  | HOH A | 1 | 37.913 | 30.190 | 65.033 | O |
| ATOM | 1178 | H1 | HOH A | 2 | 37.899 | 29.261 | 65.346 | H |
| ATOM | 1179 | H2 | HOH A | 3 | 37.104 | 30.633 | 65.365 | H |
| ATOM | 1180 | O  | HOH A | 1 | 60.536 | 29.965 | 20.776 | O |
| ATOM | 1181 | H1 | HOH A | 2 | 60.517 | 29.036 | 21.089 | H |
| ATOM | 1182 | H2 | HOH A | 3 | 59.733 | 30.414 | 21.112 | H |
| ATOM | 1183 | O  | HOH A | 1 | 60.522 | 30.002 | 42.929 | O |
| ATOM | 1184 | H1 | HOH A | 2 | 60.508 | 29.074 | 43.244 | H |
| ATOM | 1185 | H2 | HOH A | 3 | 59.720 | 30.450 | 43.268 | H |
| ATOM | 1186 | O  | HOH A | 1 | 60.523 | 30.047 | 65.045 | O |
| ATOM | 1187 | H1 | HOH A | 2 | 60.506 | 29.119 | 65.360 | H |
| ATOM | 1188 | H2 | HOH A | 3 | 59.716 | 30.493 | 65.376 | H |
| ATOM | 1189 | O  | HOH A | 1 | 19.845 | 29.964 | 20.876 | O |
| ATOM | 1190 | H1 | HOH A | 2 | 19.858 | 29.044 | 21.212 | H |

|      |      |    |       |   |        |        |        |   |
|------|------|----|-------|---|--------|--------|--------|---|
| ATOM | 1191 | H2 | HOH A | 3 | 20.649 | 30.418 | 21.205 | H |
| ATOM | 1192 | O  | HOH A | 1 | 19.822 | 29.952 | 42.988 | O |
| ATOM | 1193 | H1 | HOH A | 2 | 19.834 | 29.032 | 43.326 | H |
| ATOM | 1194 | H2 | HOH A | 3 | 20.623 | 30.407 | 43.322 | H |
| ATOM | 1195 | O  | HOH A | 1 | 19.845 | 30.049 | 65.085 | O |
| ATOM | 1196 | H1 | HOH A | 2 | 19.856 | 29.131 | 65.427 | H |
| ATOM | 1197 | H2 | HOH A | 3 | 20.649 | 30.504 | 65.412 | H |
| ATOM | 1198 | O  | HOH A | 1 | 42.462 | 30.026 | 20.801 | O |
| ATOM | 1199 | H1 | HOH A | 2 | 42.479 | 29.105 | 21.136 | H |
| ATOM | 1200 | H2 | HOH A | 3 | 43.266 | 30.482 | 21.127 | H |
| ATOM | 1201 | O  | HOH A | 1 | 42.474 | 29.950 | 42.920 | O |
| ATOM | 1202 | H1 | HOH A | 2 | 42.483 | 29.030 | 43.256 | H |
| ATOM | 1203 | H2 | HOH A | 3 | 43.278 | 30.401 | 43.252 | H |
| ATOM | 1204 | O  | HOH A | 1 | 42.430 | 30.161 | 65.036 | O |
| ATOM | 1205 | H1 | HOH A | 2 | 42.435 | 29.244 | 65.382 | H |
| ATOM | 1206 | H2 | HOH A | 3 | 43.239 | 30.611 | 65.360 | H |
| ATOM | 1207 | O  | HOH A | 1 | 65.048 | 29.919 | 20.796 | O |
| ATOM | 1208 | H1 | HOH A | 2 | 65.059 | 29.001 | 21.137 | H |
| ATOM | 1209 | H2 | HOH A | 3 | 65.852 | 30.374 | 21.126 | H |
| ATOM | 1210 | O  | HOH A | 1 | 65.027 | 29.976 | 42.962 | O |
| ATOM | 1211 | H1 | HOH A | 2 | 65.041 | 29.055 | 43.298 | H |
| ATOM | 1212 | H2 | HOH A | 3 | 65.834 | 30.428 | 43.285 | H |
| ATOM | 1213 | O  | HOH A | 1 | 65.040 | 29.998 | 65.082 | O |
| ATOM | 1214 | H1 | HOH A | 2 | 65.047 | 29.078 | 65.421 | H |
| ATOM | 1215 | H2 | HOH A | 3 | 65.848 | 30.447 | 65.408 | H |
| ATOM | 1216 | O  | HOH A | 1 | 22.059 | 33.880 | 20.846 | O |
| ATOM | 1217 | H1 | HOH A | 2 | 22.861 | 34.349 | 21.158 | H |
| ATOM | 1218 | H2 | HOH A | 3 | 22.061 | 33.895 | 19.866 | H |
| ATOM | 1219 | O  | HOH A | 1 | 22.040 | 33.862 | 42.941 | O |
| ATOM | 1220 | H1 | HOH A | 2 | 22.841 | 34.332 | 43.252 | H |
| ATOM | 1221 | H2 | HOH A | 3 | 22.045 | 33.871 | 41.961 | H |
| ATOM | 1222 | O  | HOH A | 1 | 22.064 | 33.980 | 65.043 | O |
| ATOM | 1223 | H1 | HOH A | 2 | 22.862 | 34.453 | 65.358 | H |
| ATOM | 1224 | H2 | HOH A | 3 | 22.073 | 33.992 | 64.063 | H |
| ATOM | 1225 | O  | HOH A | 1 | 44.675 | 33.930 | 20.747 | O |
| ATOM | 1226 | H1 | HOH A | 2 | 45.487 | 34.386 | 21.050 | H |

|      |      |    |       |   |        |        |        |   |
|------|------|----|-------|---|--------|--------|--------|---|
| ATOM | 1227 | H2 | HOH A | 3 | 44.662 | 33.955 | 19.767 | H |
| ATOM | 1228 | O  | HOH A | 1 | 44.697 | 33.864 | 42.871 | O |
| ATOM | 1229 | H1 | HOH A | 2 | 45.502 | 34.329 | 43.183 | H |
| ATOM | 1230 | H2 | HOH A | 3 | 44.702 | 33.873 | 41.891 | H |
| ATOM | 1231 | O  | HOH A | 1 | 44.637 | 34.072 | 64.980 | O |
| ATOM | 1232 | H1 | HOH A | 2 | 45.448 | 34.530 | 65.284 | H |
| ATOM | 1233 | H2 | HOH A | 3 | 44.631 | 34.086 | 64.000 | H |
| ATOM | 1234 | O  | HOH A | 1 | 67.269 | 33.838 | 20.758 | O |
| ATOM | 1235 | H1 | HOH A | 2 | 68.075 | 34.300 | 21.071 | H |
| ATOM | 1236 | H2 | HOH A | 3 | 67.276 | 33.847 | 19.778 | H |
| ATOM | 1237 | O  | HOH A | 1 | 67.231 | 33.883 | 42.919 | O |
| ATOM | 1238 | H1 | HOH A | 2 | 68.035 | 34.351 | 43.229 | H |
| ATOM | 1239 | H2 | HOH A | 3 | 67.231 | 33.897 | 41.939 | H |
| ATOM | 1240 | O  | HOH A | 1 | 67.262 | 33.900 | 65.040 | O |
| ATOM | 1241 | H1 | HOH A | 2 | 68.068 | 34.360 | 65.354 | H |
| ATOM | 1242 | H2 | HOH A | 3 | 67.266 | 33.917 | 64.060 | H |
| ATOM | 1243 | O  | HOH A | 1 | 4.018  | 33.841 | 20.781 | O |
| ATOM | 1244 | H1 | HOH A | 2 | 4.033  | 32.925 | 21.129 | H |
| ATOM | 1245 | H2 | HOH A | 3 | 4.803  | 34.311 | 21.134 | H |
| ATOM | 1246 | O  | HOH A | 1 | 3.971  | 33.883 | 42.933 | O |
| ATOM | 1247 | H1 | HOH A | 2 | 3.992  | 32.969 | 43.284 | H |
| ATOM | 1248 | H2 | HOH A | 3 | 4.758  | 34.357 | 43.275 | H |
| ATOM | 1249 | O  | HOH A | 1 | 4.020  | 33.883 | 65.049 | O |
| ATOM | 1250 | H1 | HOH A | 2 | 4.035  | 32.964 | 65.387 | H |
| ATOM | 1251 | H2 | HOH A | 3 | 4.810  | 34.347 | 65.396 | H |
| ATOM | 1252 | O  | HOH A | 1 | 26.612 | 33.907 | 20.838 | O |
| ATOM | 1253 | H1 | HOH A | 2 | 26.631 | 32.990 | 21.182 | H |
| ATOM | 1254 | H2 | HOH A | 3 | 27.399 | 34.377 | 21.184 | H |
| ATOM | 1255 | O  | HOH A | 1 | 26.599 | 33.859 | 42.934 | O |
| ATOM | 1256 | H1 | HOH A | 2 | 26.613 | 32.941 | 43.275 | H |
| ATOM | 1257 | H2 | HOH A | 3 | 27.387 | 34.325 | 43.285 | H |
| ATOM | 1258 | O  | HOH A | 1 | 26.590 | 34.019 | 65.045 | O |
| ATOM | 1259 | H1 | HOH A | 2 | 26.609 | 33.105 | 65.397 | H |
| ATOM | 1260 | H2 | HOH A | 3 | 27.378 | 34.492 | 65.386 | H |
| ATOM | 1261 | O  | HOH A | 1 | 49.227 | 33.914 | 20.726 | O |
| ATOM | 1262 | H1 | HOH A | 2 | 49.249 | 32.998 | 21.073 | H |

|      |      |    |       |   |        |        |        |   |
|------|------|----|-------|---|--------|--------|--------|---|
| ATOM | 1263 | H2 | HOH A | 3 | 50.014 | 34.387 | 21.067 | H |
| ATOM | 1264 | O  | HOH A | 1 | 49.232 | 33.886 | 42.878 | O |
| ATOM | 1265 | H1 | HOH A | 2 | 49.241 | 32.971 | 43.229 | H |
| ATOM | 1266 | H2 | HOH A | 3 | 50.024 | 34.350 | 43.223 | H |
| ATOM | 1267 | O  | HOH A | 1 | 49.200 | 34.044 | 64.999 | O |
| ATOM | 1268 | H1 | HOH A | 2 | 49.216 | 33.125 | 65.338 | H |
| ATOM | 1269 | H2 | HOH A | 3 | 49.996 | 34.506 | 65.338 | H |
| ATOM | 1270 | O  | HOH A | 1 | 8.529  | 33.846 | 20.812 | O |
| ATOM | 1271 | H1 | HOH A | 2 | 7.737  | 34.310 | 21.154 | H |
| ATOM | 1272 | H2 | HOH A | 3 | 9.323  | 34.314 | 21.146 | H |
| ATOM | 1273 | O  | HOH A | 1 | 8.476  | 33.868 | 42.954 | O |
| ATOM | 1274 | H1 | HOH A | 2 | 7.685  | 34.336 | 43.292 | H |
| ATOM | 1275 | H2 | HOH A | 3 | 9.270  | 34.339 | 43.284 | H |
| ATOM | 1276 | O  | HOH A | 1 | 8.541  | 33.885 | 65.047 | O |
| ATOM | 1277 | H1 | HOH A | 2 | 7.751  | 34.349 | 65.395 | H |
| ATOM | 1278 | H2 | HOH A | 3 | 9.336  | 34.351 | 65.379 | H |
| ATOM | 1279 | O  | HOH A | 1 | 31.122 | 33.917 | 20.818 | O |
| ATOM | 1280 | H1 | HOH A | 2 | 30.330 | 34.376 | 21.168 | H |
| ATOM | 1281 | H2 | HOH A | 3 | 31.915 | 34.393 | 21.141 | H |
| ATOM | 1282 | O  | HOH A | 1 | 31.128 | 33.840 | 42.931 | O |
| ATOM | 1283 | H1 | HOH A | 2 | 30.335 | 34.308 | 43.267 | H |
| ATOM | 1284 | H2 | HOH A | 3 | 31.921 | 34.313 | 43.261 | H |
| ATOM | 1285 | O  | HOH A | 1 | 31.115 | 34.060 | 65.039 | O |
| ATOM | 1286 | H1 | HOH A | 2 | 30.320 | 34.517 | 65.384 | H |
| ATOM | 1287 | H2 | HOH A | 3 | 31.906 | 34.536 | 65.370 | H |
| ATOM | 1288 | O  | HOH A | 1 | 53.738 | 33.897 | 20.733 | O |
| ATOM | 1289 | H1 | HOH A | 2 | 52.947 | 34.365 | 21.073 | H |
| ATOM | 1290 | H2 | HOH A | 3 | 54.533 | 34.366 | 21.065 | H |
| ATOM | 1291 | O  | HOH A | 1 | 53.752 | 33.891 | 42.885 | O |
| ATOM | 1292 | H1 | HOH A | 2 | 52.958 | 34.357 | 43.222 | H |
| ATOM | 1293 | H2 | HOH A | 3 | 54.544 | 34.366 | 43.213 | H |
| ATOM | 1294 | O  | HOH A | 1 | 53.725 | 34.009 | 64.991 | O |
| ATOM | 1295 | H1 | HOH A | 2 | 52.935 | 34.479 | 65.332 | H |
| ATOM | 1296 | H2 | HOH A | 3 | 54.521 | 34.477 | 65.319 | H |
| ATOM | 1297 | O  | HOH A | 1 | 13.051 | 33.856 | 20.877 | O |
| ATOM | 1298 | H1 | HOH A | 2 | 13.054 | 32.927 | 21.188 | H |



|      |      |    |       |   |        |        |        |   |
|------|------|----|-------|---|--------|--------|--------|---|
| ATOM | 1299 | H2 | HOH A | 3 | 13.062 | 33.848 | 19.897 | H |
| ATOM | 1300 | O  | HOH A | 1 | 13.003 | 33.892 | 42.989 | O |
| ATOM | 1301 | H1 | HOH A | 2 | 13.017 | 32.965 | 43.305 | H |
| ATOM | 1302 | H2 | HOH A | 3 | 13.009 | 33.878 | 42.009 | H |
| ATOM | 1303 | O  | HOH A | 1 | 13.045 | 33.904 | 65.075 | O |
| ATOM | 1304 | H1 | HOH A | 2 | 13.049 | 32.978 | 65.394 | H |
| ATOM | 1305 | H2 | HOH A | 3 | 13.054 | 33.887 | 64.095 | H |
| ATOM | 1306 | O  | HOH A | 1 | 35.649 | 33.963 | 20.837 | O |
| ATOM | 1307 | H1 | HOH A | 2 | 35.657 | 33.031 | 21.139 | H |
| ATOM | 1308 | H2 | HOH A | 3 | 35.663 | 33.965 | 19.857 | H |
| ATOM | 1309 | O  | HOH A | 1 | 35.658 | 33.864 | 42.935 | O |
| ATOM | 1310 | H1 | HOH A | 2 | 35.660 | 32.935 | 43.246 | H |
| ATOM | 1311 | H2 | HOH A | 3 | 35.668 | 33.856 | 41.955 | H |
| ATOM | 1312 | O  | HOH A | 1 | 35.635 | 34.093 | 65.061 | O |
| ATOM | 1313 | H1 | HOH A | 2 | 35.636 | 33.168 | 65.385 | H |
| ATOM | 1314 | H2 | HOH A | 3 | 35.646 | 34.070 | 64.081 | H |
| ATOM | 1315 | O  | HOH A | 1 | 58.249 | 33.890 | 20.779 | O |
| ATOM | 1316 | H1 | HOH A | 2 | 58.254 | 32.962 | 21.093 | H |
| ATOM | 1317 | H2 | HOH A | 3 | 58.253 | 33.878 | 19.799 | H |
| ATOM | 1318 | O  | HOH A | 1 | 58.243 | 33.909 | 42.938 | O |
| ATOM | 1319 | H1 | HOH A | 2 | 58.249 | 32.983 | 43.257 | H |
| ATOM | 1320 | H2 | HOH A | 3 | 58.250 | 33.892 | 41.959 | H |
| ATOM | 1321 | O  | HOH A | 1 | 58.233 | 33.978 | 65.048 | O |
| ATOM | 1322 | H1 | HOH A | 2 | 58.236 | 33.047 | 65.355 | H |
| ATOM | 1323 | H2 | HOH A | 3 | 58.249 | 33.974 | 64.068 | H |
| ATOM | 1324 | O  | HOH A | 1 | 17.557 | 33.869 | 20.877 | O |
| ATOM | 1325 | H1 | HOH A | 2 | 17.582 | 32.946 | 21.204 | H |
| ATOM | 1326 | H2 | HOH A | 3 | 18.361 | 34.326 | 21.199 | H |
| ATOM | 1327 | O  | HOH A | 1 | 17.532 | 33.875 | 42.974 | O |
| ATOM | 1328 | H1 | HOH A | 2 | 17.551 | 32.951 | 43.301 | H |
| ATOM | 1329 | H2 | HOH A | 3 | 18.336 | 34.329 | 43.301 | H |
| ATOM | 1330 | O  | HOH A | 1 | 17.564 | 33.946 | 65.067 | O |
| ATOM | 1331 | H1 | HOH A | 2 | 17.590 | 33.021 | 65.390 | H |
| ATOM | 1332 | H2 | HOH A | 3 | 18.366 | 34.404 | 65.394 | H |
| ATOM | 1333 | O  | HOH A | 1 | 40.169 | 33.963 | 20.789 | O |
| ATOM | 1334 | H1 | HOH A | 2 | 40.196 | 33.036 | 21.108 | H |

|      |      |    |       |   |        |        |        |   |
|------|------|----|-------|---|--------|--------|--------|---|
| ATOM | 1335 | H2 | HOH A | 3 | 40.973 | 34.418 | 21.116 | H |
| ATOM | 1336 | O  | HOH A | 1 | 40.188 | 33.868 | 42.908 | O |
| ATOM | 1337 | H1 | HOH A | 2 | 40.209 | 32.944 | 43.234 | H |
| ATOM | 1338 | H2 | HOH A | 3 | 40.992 | 34.323 | 43.235 | H |
| ATOM | 1339 | O  | HOH A | 1 | 40.133 | 34.101 | 65.029 | O |
| ATOM | 1340 | H1 | HOH A | 2 | 40.155 | 33.178 | 65.359 | H |
| ATOM | 1341 | H2 | HOH A | 3 | 40.937 | 34.558 | 65.354 | H |
| ATOM | 1342 | O  | HOH A | 1 | 62.762 | 33.858 | 20.769 | O |
| ATOM | 1343 | H1 | HOH A | 2 | 62.783 | 32.935 | 21.100 | H |
| ATOM | 1344 | H2 | HOH A | 3 | 63.564 | 34.316 | 21.097 | H |
| ATOM | 1345 | O  | HOH A | 1 | 62.741 | 33.893 | 42.940 | O |
| ATOM | 1346 | H1 | HOH A | 2 | 62.764 | 32.970 | 43.269 | H |
| ATOM | 1347 | H2 | HOH A | 3 | 63.541 | 34.353 | 43.272 | H |
| ATOM | 1348 | O  | HOH A | 1 | 62.741 | 33.941 | 65.055 | O |
| ATOM | 1349 | H1 | HOH A | 2 | 62.762 | 33.015 | 65.375 | H |
| ATOM | 1350 | H2 | HOH A | 3 | 63.545 | 34.394 | 65.386 | H |
| ATOM | 1351 | O  | HOH A | 1 | 1.742  | 37.721 | 20.807 | O |
| ATOM | 1352 | H1 | HOH A | 2 | 2.543  | 38.189 | 21.125 | H |
| ATOM | 1353 | H2 | HOH A | 3 | 1.759  | 37.725 | 19.827 | H |
| ATOM | 1354 | O  | HOH A | 1 | 1.696  | 37.773 | 42.952 | O |
| ATOM | 1355 | H1 | HOH A | 2 | 2.491  | 38.244 | 43.279 | H |
| ATOM | 1356 | H2 | HOH A | 3 | 1.725  | 37.773 | 41.973 | H |
| ATOM | 1357 | O  | HOH A | 1 | 1.735  | 37.779 | 65.071 | O |
| ATOM | 1358 | H1 | HOH A | 2 | 2.534  | 38.248 | 65.391 | H |
| ATOM | 1359 | H2 | HOH A | 3 | 1.754  | 37.784 | 64.091 | H |
| ATOM | 1360 | O  | HOH A | 1 | 24.326 | 37.784 | 20.846 | O |
| ATOM | 1361 | H1 | HOH A | 2 | 25.126 | 38.254 | 21.162 | H |
| ATOM | 1362 | H2 | HOH A | 3 | 24.338 | 37.791 | 19.866 | H |
| ATOM | 1363 | O  | HOH A | 1 | 24.326 | 37.747 | 42.961 | O |
| ATOM | 1364 | H1 | HOH A | 2 | 25.129 | 38.210 | 43.277 | H |
| ATOM | 1365 | H2 | HOH A | 3 | 24.343 | 37.743 | 41.982 | H |
| ATOM | 1366 | O  | HOH A | 1 | 24.321 | 37.888 | 65.063 | O |
| ATOM | 1367 | H1 | HOH A | 2 | 25.110 | 38.372 | 65.385 | H |
| ATOM | 1368 | H2 | HOH A | 3 | 24.345 | 37.887 | 64.083 | H |
| ATOM | 1369 | O  | HOH A | 1 | 46.930 | 37.807 | 20.763 | O |
| ATOM | 1370 | H1 | HOH A | 2 | 47.730 | 38.271 | 21.086 | H |

|      |      |    |       |   |        |        |        |   |
|------|------|----|-------|---|--------|--------|--------|---|
| ATOM | 1371 | H2 | HOH A | 3 | 46.945 | 37.823 | 19.783 | H |
| ATOM | 1372 | O  | HOH A | 1 | 46.943 | 37.773 | 42.887 | O |
| ATOM | 1373 | H1 | HOH A | 2 | 47.744 | 38.240 | 43.206 | H |
| ATOM | 1374 | H2 | HOH A | 3 | 46.966 | 37.765 | 41.908 | H |
| ATOM | 1375 | O  | HOH A | 1 | 46.918 | 37.940 | 65.010 | O |
| ATOM | 1376 | H1 | HOH A | 2 | 47.716 | 38.408 | 65.334 | H |
| ATOM | 1377 | H2 | HOH A | 3 | 46.939 | 37.949 | 64.030 | H |
| ATOM | 1378 | O  | HOH A | 1 | 6.263  | 37.755 | 20.841 | O |
| ATOM | 1379 | H1 | HOH A | 2 | 7.061  | 38.222 | 21.166 | H |
| ATOM | 1380 | H2 | HOH A | 3 | 6.278  | 37.775 | 19.862 | H |
| ATOM | 1381 | O  | HOH A | 1 | 6.221  | 37.790 | 42.982 | O |
| ATOM | 1382 | H1 | HOH A | 2 | 7.019  | 38.258 | 43.304 | H |
| ATOM | 1383 | H2 | HOH A | 3 | 6.240  | 37.799 | 42.002 | H |
| ATOM | 1384 | O  | HOH A | 1 | 6.277  | 37.791 | 65.094 | O |
| ATOM | 1385 | H1 | HOH A | 2 | 7.077  | 38.256 | 65.416 | H |
| ATOM | 1386 | H2 | HOH A | 3 | 6.287  | 37.813 | 64.114 | H |
| ATOM | 1387 | O  | HOH A | 1 | 28.856 | 37.827 | 20.866 | O |
| ATOM | 1388 | H1 | HOH A | 2 | 29.653 | 38.298 | 21.190 | H |
| ATOM | 1389 | H2 | HOH A | 3 | 28.868 | 37.852 | 19.886 | H |
| ATOM | 1390 | O  | HOH A | 1 | 28.872 | 37.759 | 42.961 | O |
| ATOM | 1391 | H1 | HOH A | 2 | 29.674 | 38.224 | 43.278 | H |
| ATOM | 1392 | H2 | HOH A | 3 | 28.881 | 37.772 | 41.982 | H |
| ATOM | 1393 | O  | HOH A | 1 | 28.862 | 37.959 | 65.071 | O |
| ATOM | 1394 | H1 | HOH A | 2 | 29.657 | 38.431 | 65.396 | H |
| ATOM | 1395 | H2 | HOH A | 3 | 28.879 | 37.976 | 64.091 | H |
| ATOM | 1396 | O  | HOH A | 1 | 51.484 | 37.822 | 20.768 | O |
| ATOM | 1397 | H1 | HOH A | 2 | 52.286 | 38.285 | 21.089 | H |
| ATOM | 1398 | H2 | HOH A | 3 | 51.494 | 37.842 | 19.788 | H |
| ATOM | 1399 | O  | HOH A | 1 | 51.482 | 37.798 | 42.906 | O |
| ATOM | 1400 | H1 | HOH A | 2 | 52.281 | 38.262 | 43.232 | H |
| ATOM | 1401 | H2 | HOH A | 3 | 51.507 | 37.804 | 41.926 | H |
| ATOM | 1402 | O  | HOH A | 1 | 51.460 | 37.947 | 65.038 | O |
| ATOM | 1403 | H1 | HOH A | 2 | 52.258 | 38.411 | 65.365 | H |
| ATOM | 1404 | H2 | HOH A | 3 | 51.477 | 37.969 | 64.058 | H |
| ATOM | 1405 | O  | HOH A | 1 | 10.795 | 37.753 | 20.871 | O |
| ATOM | 1406 | H1 | HOH A | 2 | 9.993  | 38.222 | 21.185 | H |

|      |      |    |       |   |        |        |        |   |
|------|------|----|-------|---|--------|--------|--------|---|
| ATOM | 1407 | H2 | HOH A | 3 | 10.791 | 37.769 | 19.891 | H |
| ATOM | 1408 | O  | HOH A | 1 | 10.763 | 37.784 | 42.997 | O |
| ATOM | 1409 | H1 | HOH A | 2 | 9.960  | 38.250 | 43.311 | H |
| ATOM | 1410 | H2 | HOH A | 3 | 10.758 | 37.800 | 42.017 | H |
| ATOM | 1411 | O  | HOH A | 1 | 10.816 | 37.798 | 65.100 | O |
| ATOM | 1412 | H1 | HOH A | 2 | 10.015 | 38.263 | 65.422 | H |
| ATOM | 1413 | H2 | HOH A | 3 | 10.802 | 37.815 | 64.120 | H |
| ATOM | 1414 | O  | HOH A | 1 | 33.401 | 37.851 | 20.847 | O |
| ATOM | 1415 | H1 | HOH A | 2 | 32.598 | 38.308 | 21.172 | H |
| ATOM | 1416 | H2 | HOH A | 3 | 33.388 | 37.875 | 19.867 | H |
| ATOM | 1417 | O  | HOH A | 1 | 33.431 | 37.762 | 42.947 | O |
| ATOM | 1418 | H1 | HOH A | 2 | 32.631 | 38.227 | 43.268 | H |
| ATOM | 1419 | H2 | HOH A | 3 | 33.416 | 37.774 | 41.967 | H |
| ATOM | 1420 | O  | HOH A | 1 | 33.416 | 37.986 | 65.089 | O |
| ATOM | 1421 | H1 | HOH A | 2 | 32.612 | 38.453 | 65.399 | H |
| ATOM | 1422 | H2 | HOH A | 3 | 33.415 | 37.999 | 64.109 | H |
| ATOM | 1423 | O  | HOH A | 1 | 56.030 | 37.799 | 20.777 | O |
| ATOM | 1424 | H1 | HOH A | 2 | 55.231 | 38.266 | 21.098 | H |
| ATOM | 1425 | H2 | HOH A | 3 | 56.014 | 37.809 | 19.797 | H |
| ATOM | 1426 | O  | HOH A | 1 | 56.025 | 37.811 | 42.928 | O |
| ATOM | 1427 | H1 | HOH A | 2 | 55.224 | 38.273 | 43.251 | H |
| ATOM | 1428 | H2 | HOH A | 3 | 56.010 | 37.826 | 41.949 | H |
| ATOM | 1429 | O  | HOH A | 1 | 56.009 | 37.907 | 65.049 | O |
| ATOM | 1430 | H1 | HOH A | 2 | 55.212 | 38.380 | 65.367 | H |
| ATOM | 1431 | H2 | HOH A | 3 | 56.004 | 37.928 | 64.069 | H |
| ATOM | 1432 | O  | HOH A | 1 | 15.296 | 37.769 | 20.829 | O |
| ATOM | 1433 | H1 | HOH A | 2 | 15.281 | 36.849 | 21.168 | H |
| ATOM | 1434 | H2 | HOH A | 3 | 14.492 | 38.224 | 21.155 | H |
| ATOM | 1435 | O  | HOH A | 1 | 15.272 | 37.800 | 42.956 | O |
| ATOM | 1436 | H1 | HOH A | 2 | 15.251 | 36.882 | 43.298 | H |
| ATOM | 1437 | H2 | HOH A | 3 | 14.469 | 38.261 | 43.278 | H |
| ATOM | 1438 | O  | HOH A | 1 | 15.287 | 37.829 | 65.050 | O |
| ATOM | 1439 | H1 | HOH A | 2 | 15.270 | 36.910 | 65.391 | H |
| ATOM | 1440 | H2 | HOH A | 3 | 14.482 | 38.286 | 65.372 | H |
| ATOM | 1441 | O  | HOH A | 1 | 37.898 | 37.863 | 20.791 | O |
| ATOM | 1442 | H1 | HOH A | 2 | 37.879 | 36.944 | 21.131 | H |

|      |      |    |       |   |        |        |        |   |
|------|------|----|-------|---|--------|--------|--------|---|
| ATOM | 1443 | H2 | HOH A | 3 | 37.094 | 38.322 | 21.113 | H |
| ATOM | 1444 | O  | HOH A | 1 | 37.915 | 37.769 | 42.885 | O |
| ATOM | 1445 | H1 | HOH A | 2 | 37.886 | 36.852 | 43.230 | H |
| ATOM | 1446 | H2 | HOH A | 3 | 37.117 | 38.238 | 43.206 | H |
| ATOM | 1447 | O  | HOH A | 1 | 37.893 | 38.012 | 65.023 | O |
| ATOM | 1448 | H1 | HOH A | 2 | 37.870 | 37.093 | 65.361 | H |
| ATOM | 1449 | H2 | HOH A | 3 | 37.092 | 38.474 | 65.348 | H |
| ATOM | 1450 | O  | HOH A | 1 | 60.509 | 37.789 | 20.733 | O |
| ATOM | 1451 | H1 | HOH A | 2 | 60.484 | 36.867 | 21.063 | H |
| ATOM | 1452 | H2 | HOH A | 3 | 59.710 | 38.250 | 21.062 | H |
| ATOM | 1453 | O  | HOH A | 1 | 60.490 | 37.814 | 42.909 | O |
| ATOM | 1454 | H1 | HOH A | 2 | 60.467 | 36.897 | 43.254 | H |
| ATOM | 1455 | H2 | HOH A | 3 | 59.689 | 38.279 | 43.228 | H |
| ATOM | 1456 | O  | HOH A | 1 | 60.503 | 37.875 | 65.025 | O |
| ATOM | 1457 | H1 | HOH A | 2 | 60.471 | 36.956 | 65.363 | H |
| ATOM | 1458 | H2 | HOH A | 3 | 59.703 | 38.343 | 65.344 | H |
| ATOM | 1459 | O  | HOH A | 1 | 19.793 | 37.786 | 20.863 | O |
| ATOM | 1460 | H1 | HOH A | 2 | 20.597 | 38.249 | 21.178 | H |
| ATOM | 1461 | H2 | HOH A | 3 | 19.801 | 37.800 | 19.883 | H |
| ATOM | 1462 | O  | HOH A | 1 | 19.773 | 37.786 | 42.959 | O |
| ATOM | 1463 | H1 | HOH A | 2 | 20.579 | 38.244 | 43.275 | H |
| ATOM | 1464 | H2 | HOH A | 3 | 19.784 | 37.795 | 41.979 | H |
| ATOM | 1465 | O  | HOH A | 1 | 19.783 | 37.867 | 65.072 | O |
| ATOM | 1466 | H1 | HOH A | 2 | 20.582 | 38.336 | 65.390 | H |
| ATOM | 1467 | H2 | HOH A | 3 | 19.801 | 37.868 | 64.092 | H |
| ATOM | 1468 | O  | HOH A | 1 | 42.403 | 37.861 | 20.790 | O |
| ATOM | 1469 | H1 | HOH A | 2 | 43.210 | 38.325 | 21.093 | H |
| ATOM | 1470 | H2 | HOH A | 3 | 42.398 | 37.870 | 19.810 | H |
| ATOM | 1471 | O  | HOH A | 1 | 42.414 | 37.775 | 42.890 | O |
| ATOM | 1472 | H1 | HOH A | 2 | 43.211 | 38.247 | 43.209 | H |
| ATOM | 1473 | H2 | HOH A | 3 | 42.434 | 37.775 | 41.910 | H |
| ATOM | 1474 | O  | HOH A | 1 | 42.376 | 37.991 | 65.021 | O |
| ATOM | 1475 | H1 | HOH A | 2 | 43.185 | 38.445 | 65.336 | H |
| ATOM | 1476 | H2 | HOH A | 3 | 42.390 | 37.992 | 64.041 | H |
| ATOM | 1477 | O  | HOH A | 1 | 65.005 | 37.755 | 20.780 | O |
| ATOM | 1478 | H1 | HOH A | 2 | 65.810 | 38.214 | 21.100 | H |

|      |      |    |       |   |        |        |        |   |
|------|------|----|-------|---|--------|--------|--------|---|
| ATOM | 1479 | H2 | HOH A | 3 | 65.024 | 37.760 | 19.800 | H |
| ATOM | 1480 | O  | HOH A | 1 | 64.971 | 37.794 | 42.940 | O |
| ATOM | 1481 | H1 | HOH A | 2 | 65.775 | 38.257 | 43.257 | H |
| ATOM | 1482 | H2 | HOH A | 3 | 64.990 | 37.792 | 41.960 | H |
| ATOM | 1483 | O  | HOH A | 1 | 64.994 | 37.826 | 65.077 | O |
| ATOM | 1484 | H1 | HOH A | 2 | 65.804 | 38.278 | 65.393 | H |
| ATOM | 1485 | H2 | HOH A | 3 | 65.006 | 37.833 | 64.097 | H |
| ATOM | 1486 | O  | HOH A | 1 | 22.062 | 41.704 | 20.842 | O |
| ATOM | 1487 | H1 | HOH A | 2 | 22.061 | 40.776 | 21.157 | H |
| ATOM | 1488 | H2 | HOH A | 3 | 22.051 | 41.691 | 19.862 | H |
| ATOM | 1489 | O  | HOH A | 1 | 22.055 | 41.679 | 42.951 | O |
| ATOM | 1490 | H1 | HOH A | 2 | 22.062 | 40.753 | 43.272 | H |
| ATOM | 1491 | H2 | HOH A | 3 | 22.036 | 41.660 | 41.972 | H |
| ATOM | 1492 | O  | HOH A | 1 | 22.069 | 41.799 | 65.050 | O |
| ATOM | 1493 | H1 | HOH A | 2 | 22.060 | 40.875 | 65.374 | H |
| ATOM | 1494 | H2 | HOH A | 3 | 22.057 | 41.777 | 64.070 | H |
| ATOM | 1495 | O  | HOH A | 1 | 44.696 | 41.758 | 20.768 | O |
| ATOM | 1496 | H1 | HOH A | 2 | 44.691 | 40.830 | 21.083 | H |
| ATOM | 1497 | H2 | HOH A | 3 | 44.677 | 41.746 | 19.789 | H |
| ATOM | 1498 | O  | HOH A | 1 | 44.685 | 41.702 | 42.889 | O |
| ATOM | 1499 | H1 | HOH A | 2 | 44.677 | 40.779 | 43.218 | H |
| ATOM | 1500 | H2 | HOH A | 3 | 44.677 | 41.674 | 41.909 | H |
| ATOM | 1501 | O  | HOH A | 1 | 44.649 | 41.882 | 65.017 | O |
| ATOM | 1502 | H1 | HOH A | 2 | 44.648 | 40.956 | 65.338 | H |
| ATOM | 1503 | H2 | HOH A | 3 | 44.631 | 41.863 | 64.038 | H |
| ATOM | 1504 | O  | HOH A | 1 | 67.292 | 41.655 | 20.794 | O |
| ATOM | 1505 | H1 | HOH A | 2 | 67.292 | 40.731 | 21.120 | H |
| ATOM | 1506 | H2 | HOH A | 3 | 67.277 | 41.631 | 19.814 | H |
| ATOM | 1507 | O  | HOH A | 1 | 67.241 | 41.699 | 42.952 | O |
| ATOM | 1508 | H1 | HOH A | 2 | 67.238 | 40.773 | 43.273 | H |
| ATOM | 1509 | H2 | HOH A | 3 | 67.226 | 41.679 | 41.972 | H |
| ATOM | 1510 | O  | HOH A | 1 | 67.266 | 41.723 | 65.070 | O |
| ATOM | 1511 | H1 | HOH A | 2 | 67.264 | 40.796 | 65.388 | H |
| ATOM | 1512 | H2 | HOH A | 3 | 67.250 | 41.707 | 64.090 | H |
| ATOM | 1513 | O  | HOH A | 1 | 4.001  | 41.622 | 20.813 | O |
| ATOM | 1514 | H1 | HOH A | 2 | 3.203  | 42.087 | 21.142 | H |

|      |      |    |       |   |        |        |        |   |
|------|------|----|-------|---|--------|--------|--------|---|
| ATOM | 1515 | H2 | HOH A | 3 | 4.788  | 42.098 | 21.150 | H |
| ATOM | 1516 | O  | HOH A | 1 | 3.971  | 41.674 | 42.956 | O |
| ATOM | 1517 | H1 | HOH A | 2 | 3.171  | 42.136 | 43.284 | H |
| ATOM | 1518 | H2 | HOH A | 3 | 4.757  | 42.157 | 43.287 | H |
| ATOM | 1519 | O  | HOH A | 1 | 3.992  | 41.677 | 65.078 | O |
| ATOM | 1520 | H1 | HOH A | 2 | 3.195  | 42.135 | 65.417 | H |
| ATOM | 1521 | H2 | HOH A | 3 | 4.780  | 42.152 | 65.414 | H |
| ATOM | 1522 | O  | HOH A | 1 | 26.590 | 41.710 | 20.836 | O |
| ATOM | 1523 | H1 | HOH A | 2 | 25.790 | 42.159 | 21.180 | H |
| ATOM | 1524 | H2 | HOH A | 3 | 27.375 | 42.191 | 21.171 | H |
| ATOM | 1525 | O  | HOH A | 1 | 26.589 | 41.637 | 42.937 | O |
| ATOM | 1526 | H1 | HOH A | 2 | 25.790 | 42.097 | 43.269 | H |
| ATOM | 1527 | H2 | HOH A | 3 | 27.375 | 42.116 | 43.273 | H |
| ATOM | 1528 | O  | HOH A | 1 | 26.584 | 41.818 | 65.058 | O |
| ATOM | 1529 | H1 | HOH A | 2 | 25.782 | 42.277 | 65.383 | H |
| ATOM | 1530 | H2 | HOH A | 3 | 27.367 | 42.301 | 65.394 | H |
| ATOM | 1531 | O  | HOH A | 1 | 49.219 | 41.701 | 20.747 | O |
| ATOM | 1532 | H1 | HOH A | 2 | 48.423 | 42.169 | 21.078 | H |
| ATOM | 1533 | H2 | HOH A | 3 | 50.009 | 42.175 | 21.080 | H |
| ATOM | 1534 | O  | HOH A | 1 | 49.212 | 41.674 | 42.889 | O |
| ATOM | 1535 | H1 | HOH A | 2 | 48.412 | 42.139 | 43.212 | H |
| ATOM | 1536 | H2 | HOH A | 3 | 49.997 | 42.154 | 43.225 | H |
| ATOM | 1537 | O  | HOH A | 1 | 49.175 | 41.832 | 65.016 | O |
| ATOM | 1538 | H1 | HOH A | 2 | 48.379 | 42.299 | 65.344 | H |
| ATOM | 1539 | H2 | HOH A | 3 | 49.965 | 42.305 | 65.353 | H |
| ATOM | 1540 | O  | HOH A | 1 | 8.511  | 41.669 | 20.831 | O |
| ATOM | 1541 | H1 | HOH A | 2 | 9.305  | 42.144 | 21.155 | H |
| ATOM | 1542 | H2 | HOH A | 3 | 8.525  | 41.689 | 19.851 | H |
| ATOM | 1543 | O  | HOH A | 1 | 8.473  | 41.705 | 42.998 | O |
| ATOM | 1544 | H1 | HOH A | 2 | 9.274  | 42.175 | 43.311 | H |
| ATOM | 1545 | H2 | HOH A | 3 | 8.476  | 41.722 | 42.018 | H |
| ATOM | 1546 | O  | HOH A | 1 | 8.516  | 41.711 | 65.093 | O |
| ATOM | 1547 | H1 | HOH A | 2 | 9.312  | 42.182 | 65.419 | H |
| ATOM | 1548 | H2 | HOH A | 3 | 8.523  | 41.747 | 64.114 | H |
| ATOM | 1549 | O  | HOH A | 1 | 31.116 | 41.766 | 20.844 | O |
| ATOM | 1550 | H1 | HOH A | 2 | 31.915 | 42.238 | 21.159 | H |

|      |      |    |       |   |        |        |        |   |
|------|------|----|-------|---|--------|--------|--------|---|
| ATOM | 1551 | H2 | HOH A | 3 | 31.117 | 41.789 | 19.865 | H |
| ATOM | 1552 | O  | HOH A | 1 | 31.111 | 41.666 | 42.945 | O |
| ATOM | 1553 | H1 | HOH A | 2 | 31.910 | 42.136 | 43.262 | H |
| ATOM | 1554 | H2 | HOH A | 3 | 31.118 | 41.685 | 41.965 | H |
| ATOM | 1555 | O  | HOH A | 1 | 31.112 | 41.900 | 65.059 | O |
| ATOM | 1556 | H1 | HOH A | 2 | 31.904 | 42.383 | 65.376 | H |
| ATOM | 1557 | H2 | HOH A | 3 | 31.121 | 41.914 | 64.079 | H |
| ATOM | 1558 | O  | HOH A | 1 | 53.740 | 41.723 | 20.773 | O |
| ATOM | 1559 | H1 | HOH A | 2 | 54.538 | 42.196 | 21.089 | H |
| ATOM | 1560 | H2 | HOH A | 3 | 53.742 | 41.746 | 19.793 | H |
| ATOM | 1561 | O  | HOH A | 1 | 53.727 | 41.706 | 42.916 | O |
| ATOM | 1562 | H1 | HOH A | 2 | 54.520 | 42.182 | 43.239 | H |
| ATOM | 1563 | H2 | HOH A | 3 | 53.742 | 41.722 | 41.937 | H |
| ATOM | 1564 | O  | HOH A | 1 | 53.706 | 41.838 | 65.036 | O |
| ATOM | 1565 | H1 | HOH A | 2 | 54.510 | 42.300 | 65.353 | H |
| ATOM | 1566 | H2 | HOH A | 3 | 53.708 | 41.863 | 64.056 | H |
| ATOM | 1567 | O  | HOH A | 1 | 13.048 | 41.688 | 20.864 | O |
| ATOM | 1568 | H1 | HOH A | 2 | 12.244 | 42.138 | 21.199 | H |
| ATOM | 1569 | H2 | HOH A | 3 | 13.018 | 41.706 | 19.885 | H |
| ATOM | 1570 | O  | HOH A | 1 | 13.017 | 41.721 | 42.988 | O |
| ATOM | 1571 | H1 | HOH A | 2 | 12.214 | 42.176 | 43.318 | H |
| ATOM | 1572 | H2 | HOH A | 3 | 12.986 | 41.724 | 42.009 | H |
| ATOM | 1573 | O  | HOH A | 1 | 13.055 | 41.756 | 65.083 | O |
| ATOM | 1574 | H1 | HOH A | 2 | 12.259 | 42.219 | 65.416 | H |
| ATOM | 1575 | H2 | HOH A | 3 | 13.024 | 41.765 | 64.103 | H |
| ATOM | 1576 | O  | HOH A | 1 | 35.660 | 41.791 | 20.824 | O |
| ATOM | 1577 | H1 | HOH A | 2 | 34.860 | 42.245 | 21.161 | H |
| ATOM | 1578 | H2 | HOH A | 3 | 35.629 | 41.807 | 19.845 | H |
| ATOM | 1579 | O  | HOH A | 1 | 35.667 | 41.704 | 42.930 | O |
| ATOM | 1580 | H1 | HOH A | 2 | 34.863 | 42.157 | 43.258 | H |
| ATOM | 1581 | H2 | HOH A | 3 | 35.639 | 41.708 | 41.950 | H |
| ATOM | 1582 | O  | HOH A | 1 | 35.656 | 41.935 | 65.053 | O |
| ATOM | 1583 | H1 | HOH A | 2 | 34.857 | 42.400 | 65.377 | H |
| ATOM | 1584 | H2 | HOH A | 3 | 35.630 | 41.936 | 64.073 | H |
| ATOM | 1585 | O  | HOH A | 1 | 58.277 | 41.729 | 20.765 | O |
| ATOM | 1586 | H1 | HOH A | 2 | 57.478 | 42.191 | 21.095 | H |



|      |      |    |       |   |        |        |        |   |
|------|------|----|-------|---|--------|--------|--------|---|
| ATOM | 1587 | H2 | HOH A | 3 | 58.242 | 41.726 | 19.786 | H |
| ATOM | 1588 | O  | HOH A | 1 | 58.252 | 41.751 | 42.909 | O |
| ATOM | 1589 | H1 | HOH A | 2 | 57.445 | 42.205 | 43.231 | H |
| ATOM | 1590 | H2 | HOH A | 3 | 58.229 | 41.751 | 41.929 | H |
| ATOM | 1591 | O  | HOH A | 1 | 58.250 | 41.815 | 65.044 | O |
| ATOM | 1592 | H1 | HOH A | 2 | 57.450 | 42.279 | 65.370 | H |
| ATOM | 1593 | H2 | HOH A | 3 | 58.228 | 41.824 | 64.064 | H |
| ATOM | 1594 | O  | HOH A | 1 | 17.518 | 41.685 | 20.870 | O |
| ATOM | 1595 | H1 | HOH A | 2 | 17.501 | 40.764 | 21.202 | H |
| ATOM | 1596 | H2 | HOH A | 3 | 16.719 | 42.143 | 21.206 | H |
| ATOM | 1597 | O  | HOH A | 1 | 17.502 | 41.698 | 42.979 | O |
| ATOM | 1598 | H1 | HOH A | 2 | 17.486 | 40.777 | 43.313 | H |
| ATOM | 1599 | H2 | HOH A | 3 | 16.703 | 42.155 | 43.315 | H |
| ATOM | 1600 | O  | HOH A | 1 | 17.531 | 41.753 | 65.078 | O |
| ATOM | 1601 | H1 | HOH A | 2 | 17.501 | 40.831 | 65.409 | H |
| ATOM | 1602 | H2 | HOH A | 3 | 16.734 | 42.219 | 65.408 | H |
| ATOM | 1603 | O  | HOH A | 1 | 40.136 | 41.764 | 20.808 | O |
| ATOM | 1604 | H1 | HOH A | 2 | 40.115 | 40.841 | 21.138 | H |
| ATOM | 1605 | H2 | HOH A | 3 | 39.340 | 42.225 | 21.146 | H |
| ATOM | 1606 | O  | HOH A | 1 | 40.143 | 41.685 | 42.913 | O |
| ATOM | 1607 | H1 | HOH A | 2 | 40.130 | 40.767 | 43.254 | H |
| ATOM | 1608 | H2 | HOH A | 3 | 39.346 | 42.145 | 43.248 | H |
| ATOM | 1609 | O  | HOH A | 1 | 40.116 | 41.918 | 65.038 | O |
| ATOM | 1610 | H1 | HOH A | 2 | 40.101 | 40.994 | 65.365 | H |
| ATOM | 1611 | H2 | HOH A | 3 | 39.325 | 42.377 | 65.390 | H |
| ATOM | 1612 | O  | HOH A | 1 | 62.746 | 41.688 | 20.773 | O |
| ATOM | 1613 | H1 | HOH A | 2 | 62.720 | 40.767 | 21.106 | H |
| ATOM | 1614 | H2 | HOH A | 3 | 61.955 | 42.156 | 21.115 | H |
| ATOM | 1615 | O  | HOH A | 1 | 62.721 | 41.712 | 42.930 | O |
| ATOM | 1616 | H1 | HOH A | 2 | 62.700 | 40.792 | 43.266 | H |
| ATOM | 1617 | H2 | HOH A | 3 | 61.923 | 42.175 | 43.263 | H |
| ATOM | 1618 | O  | HOH A | 1 | 62.728 | 41.767 | 65.067 | O |
| ATOM | 1619 | H1 | HOH A | 2 | 62.705 | 40.844 | 65.396 | H |
| ATOM | 1620 | H2 | HOH A | 3 | 61.927 | 42.226 | 65.397 | H |
| ATOM | 1621 | O  | HOH A | 1 | 1.740  | 45.570 | 18.039 | O |
| ATOM | 1622 | H1 | HOH A | 2 | 1.729  | 44.648 | 17.707 | H |

|      |      |    |       |   |        |        |        |   |
|------|------|----|-------|---|--------|--------|--------|---|
| ATOM | 1623 | H2 | HOH A | 3 | 0.932  | 46.019 | 17.714 | H |
| ATOM | 1624 | O  | HOH A | 1 | 1.724  | 45.594 | 40.199 | O |
| ATOM | 1625 | H1 | HOH A | 2 | 1.715  | 44.675 | 39.859 | H |
| ATOM | 1626 | H2 | HOH A | 3 | 0.917  | 46.045 | 39.873 | H |
| ATOM | 1627 | O  | HOH A | 1 | 1.728  | 45.651 | 62.315 | O |
| ATOM | 1628 | H1 | HOH A | 2 | 1.712  | 44.733 | 61.971 | H |
| ATOM | 1629 | H2 | HOH A | 3 | 0.924  | 46.109 | 61.992 | H |
| ATOM | 1630 | O  | HOH A | 1 | 24.325 | 45.651 | 18.092 | O |
| ATOM | 1631 | H1 | HOH A | 2 | 24.310 | 44.732 | 17.751 | H |
| ATOM | 1632 | H2 | HOH A | 3 | 23.518 | 46.106 | 17.772 | H |
| ATOM | 1633 | O  | HOH A | 1 | 24.323 | 45.587 | 40.182 | O |
| ATOM | 1634 | H1 | HOH A | 2 | 24.306 | 44.666 | 39.848 | H |
| ATOM | 1635 | H2 | HOH A | 3 | 23.514 | 46.039 | 39.864 | H |
| ATOM | 1636 | O  | HOH A | 1 | 24.349 | 45.737 | 62.296 | O |
| ATOM | 1637 | H1 | HOH A | 2 | 24.339 | 44.816 | 61.961 | H |
| ATOM | 1638 | H2 | HOH A | 3 | 23.539 | 46.185 | 61.974 | H |
| ATOM | 1639 | O  | HOH A | 1 | 46.942 | 45.691 | 18.001 | O |
| ATOM | 1640 | H1 | HOH A | 2 | 46.927 | 44.773 | 17.657 | H |
| ATOM | 1641 | H2 | HOH A | 3 | 46.131 | 46.144 | 17.689 | H |
| ATOM | 1642 | O  | HOH A | 1 | 46.970 | 45.575 | 40.124 | O |
| ATOM | 1643 | H1 | HOH A | 2 | 46.957 | 44.651 | 39.795 | H |
| ATOM | 1644 | H2 | HOH A | 3 | 46.160 | 46.022 | 39.801 | H |
| ATOM | 1645 | O  | HOH A | 1 | 46.928 | 45.800 | 62.249 | O |
| ATOM | 1646 | H1 | HOH A | 2 | 46.910 | 44.882 | 61.909 | H |
| ATOM | 1647 | H2 | HOH A | 3 | 46.121 | 46.257 | 61.931 | H |
| ATOM | 1648 | O  | HOH A | 1 | 6.225  | 45.590 | 18.060 | O |
| ATOM | 1649 | H1 | HOH A | 2 | 6.241  | 44.669 | 17.726 | H |
| ATOM | 1650 | H2 | HOH A | 3 | 7.031  | 46.044 | 17.736 | H |
| ATOM | 1651 | O  | HOH A | 1 | 6.212  | 45.635 | 40.224 | O |
| ATOM | 1652 | H1 | HOH A | 2 | 6.224  | 44.717 | 39.883 | H |
| ATOM | 1653 | H2 | HOH A | 3 | 7.014  | 46.092 | 39.893 | H |
| ATOM | 1654 | O  | HOH A | 1 | 6.218  | 45.655 | 62.327 | O |
| ATOM | 1655 | H1 | HOH A | 2 | 6.232  | 44.733 | 61.994 | H |
| ATOM | 1656 | H2 | HOH A | 3 | 7.025  | 46.107 | 62.002 | H |
| ATOM | 1657 | O  | HOH A | 1 | 28.823 | 45.723 | 18.082 | O |
| ATOM | 1658 | H1 | HOH A | 2 | 28.839 | 44.803 | 17.746 | H |

|      |      |    |       |   |        |        |        |   |
|------|------|----|-------|---|--------|--------|--------|---|
| ATOM | 1659 | H2 | HOH A | 3 | 29.630 | 46.177 | 17.761 | H |
| ATOM | 1660 | O  | HOH A | 1 | 28.819 | 45.596 | 40.183 | O |
| ATOM | 1661 | H1 | HOH A | 2 | 28.830 | 44.675 | 39.849 | H |
| ATOM | 1662 | H2 | HOH A | 3 | 29.624 | 46.047 | 39.854 | H |
| ATOM | 1663 | O  | HOH A | 1 | 28.832 | 45.784 | 62.290 | O |
| ATOM | 1664 | H1 | HOH A | 2 | 28.847 | 44.863 | 61.956 | H |
| ATOM | 1665 | H2 | HOH A | 3 | 29.633 | 46.240 | 61.956 | H |
| ATOM | 1666 | O  | HOH A | 1 | 51.435 | 45.686 | 17.997 | O |
| ATOM | 1667 | H1 | HOH A | 2 | 51.449 | 44.767 | 17.657 | H |
| ATOM | 1668 | H2 | HOH A | 3 | 52.240 | 46.141 | 17.673 | H |
| ATOM | 1669 | O  | HOH A | 1 | 51.458 | 45.630 | 40.136 | O |
| ATOM | 1670 | H1 | HOH A | 2 | 51.471 | 44.707 | 39.805 | H |
| ATOM | 1671 | H2 | HOH A | 3 | 52.267 | 46.078 | 39.812 | H |
| ATOM | 1672 | O  | HOH A | 1 | 51.417 | 45.807 | 62.260 | O |
| ATOM | 1673 | H1 | HOH A | 2 | 51.423 | 44.885 | 61.927 | H |
| ATOM | 1674 | H2 | HOH A | 3 | 52.227 | 46.252 | 61.935 | H |
| ATOM | 1675 | O  | HOH A | 1 | 10.771 | 45.579 | 18.103 | O |
| ATOM | 1676 | H1 | HOH A | 2 | 9.980  | 46.053 | 17.772 | H |
| ATOM | 1677 | H2 | HOH A | 3 | 11.566 | 46.048 | 17.771 | H |
| ATOM | 1678 | O  | HOH A | 1 | 10.742 | 45.603 | 40.253 | O |
| ATOM | 1679 | H1 | HOH A | 2 | 9.951  | 46.078 | 39.922 | H |
| ATOM | 1680 | H2 | HOH A | 3 | 11.537 | 46.068 | 39.918 | H |
| ATOM | 1681 | O  | HOH A | 1 | 10.769 | 45.647 | 62.352 | O |
| ATOM | 1682 | H1 | HOH A | 2 | 9.974  | 46.118 | 62.028 | H |
| ATOM | 1683 | H2 | HOH A | 3 | 11.559 | 46.118 | 62.013 | H |
| ATOM | 1684 | O  | HOH A | 1 | 33.363 | 45.700 | 18.096 | O |
| ATOM | 1685 | H1 | HOH A | 2 | 32.570 | 46.178 | 17.775 | H |
| ATOM | 1686 | H2 | HOH A | 3 | 34.156 | 46.163 | 17.754 | H |
| ATOM | 1687 | O  | HOH A | 1 | 33.370 | 45.572 | 40.197 | O |
| ATOM | 1688 | H1 | HOH A | 2 | 32.577 | 46.047 | 39.873 | H |
| ATOM | 1689 | H2 | HOH A | 3 | 34.162 | 46.037 | 39.857 | H |
| ATOM | 1690 | O  | HOH A | 1 | 33.376 | 45.799 | 62.312 | O |
| ATOM | 1691 | H1 | HOH A | 2 | 32.580 | 46.266 | 61.982 | H |
| ATOM | 1692 | H2 | HOH A | 3 | 34.166 | 46.271 | 61.973 | H |
| ATOM | 1693 | O  | HOH A | 1 | 55.974 | 45.636 | 18.034 | O |
| ATOM | 1694 | H1 | HOH A | 2 | 55.183 | 46.112 | 17.704 | H |

|      |      |    |       |   |        |        |        |   |
|------|------|----|-------|---|--------|--------|--------|---|
| ATOM | 1695 | H2 | HOH A | 3 | 56.769 | 46.097 | 17.693 | H |
| ATOM | 1696 | O  | HOH A | 1 | 55.996 | 45.605 | 40.183 | O |
| ATOM | 1697 | H1 | HOH A | 2 | 55.202 | 46.074 | 39.849 | H |
| ATOM | 1698 | H2 | HOH A | 3 | 56.788 | 46.076 | 39.849 | H |
| ATOM | 1699 | O  | HOH A | 1 | 55.956 | 45.731 | 62.302 | O |
| ATOM | 1700 | H1 | HOH A | 2 | 55.171 | 46.216 | 61.971 | H |
| ATOM | 1701 | H2 | HOH A | 3 | 56.757 | 46.187 | 61.969 | H |
| ATOM | 1702 | O  | HOH A | 1 | 15.278 | 45.603 | 18.069 | O |
| ATOM | 1703 | H1 | HOH A | 2 | 15.295 | 44.672 | 17.763 | H |
| ATOM | 1704 | H2 | HOH A | 3 | 15.276 | 45.600 | 19.049 | H |
| ATOM | 1705 | O  | HOH A | 1 | 15.261 | 45.595 | 40.215 | O |
| ATOM | 1706 | H1 | HOH A | 2 | 15.270 | 44.664 | 39.912 | H |
| ATOM | 1707 | H2 | HOH A | 3 | 15.259 | 45.595 | 41.195 | H |
| ATOM | 1708 | O  | HOH A | 1 | 15.291 | 45.665 | 62.289 | O |
| ATOM | 1709 | H1 | HOH A | 2 | 15.303 | 44.733 | 61.985 | H |
| ATOM | 1710 | H2 | HOH A | 3 | 15.286 | 45.663 | 63.269 | H |
| ATOM | 1711 | O  | HOH A | 1 | 37.884 | 45.708 | 18.026 | O |
| ATOM | 1712 | H1 | HOH A | 2 | 37.894 | 44.777 | 17.720 | H |
| ATOM | 1713 | H2 | HOH A | 3 | 37.886 | 45.705 | 19.006 | H |
| ATOM | 1714 | O  | HOH A | 1 | 37.906 | 45.579 | 40.132 | O |
| ATOM | 1715 | H1 | HOH A | 2 | 37.914 | 44.646 | 39.832 | H |
| ATOM | 1716 | H2 | HOH A | 3 | 37.902 | 45.582 | 41.112 | H |
| ATOM | 1717 | O  | HOH A | 1 | 37.893 | 45.820 | 62.264 | O |
| ATOM | 1718 | H1 | HOH A | 2 | 37.899 | 44.890 | 61.955 | H |
| ATOM | 1719 | H2 | HOH A | 3 | 37.886 | 45.814 | 63.243 | H |
| ATOM | 1720 | O  | HOH A | 1 | 60.491 | 45.616 | 17.999 | O |
| ATOM | 1721 | H1 | HOH A | 2 | 60.500 | 44.685 | 17.691 | H |
| ATOM | 1722 | H2 | HOH A | 3 | 60.484 | 45.610 | 18.979 | H |
| ATOM | 1723 | O  | HOH A | 1 | 60.489 | 45.612 | 40.148 | O |
| ATOM | 1724 | H1 | HOH A | 2 | 60.507 | 44.680 | 39.843 | H |
| ATOM | 1725 | H2 | HOH A | 3 | 60.479 | 45.609 | 41.128 | H |
| ATOM | 1726 | O  | HOH A | 1 | 60.467 | 45.717 | 62.275 | O |
| ATOM | 1727 | H1 | HOH A | 2 | 60.479 | 44.787 | 61.968 | H |
| ATOM | 1728 | H2 | HOH A | 3 | 60.459 | 45.712 | 63.255 | H |
| ATOM | 1729 | O  | HOH A | 1 | 19.799 | 45.605 | 18.074 | O |
| ATOM | 1730 | H1 | HOH A | 2 | 19.788 | 44.676 | 17.763 | H |

|      |      |    |       |   |        |        |        |   |
|------|------|----|-------|---|--------|--------|--------|---|
| ATOM | 1731 | H2 | HOH A | 3 | 19.807 | 45.596 | 19.054 | H |
| ATOM | 1732 | O  | HOH A | 1 | 19.790 | 45.586 | 40.186 | O |
| ATOM | 1733 | H1 | HOH A | 2 | 19.780 | 44.656 | 39.877 | H |
| ATOM | 1734 | H2 | HOH A | 3 | 19.803 | 45.578 | 41.166 | H |
| ATOM | 1735 | O  | HOH A | 1 | 19.822 | 45.685 | 62.281 | O |
| ATOM | 1736 | H1 | HOH A | 2 | 19.809 | 44.760 | 61.958 | H |
| ATOM | 1737 | H2 | HOH A | 3 | 19.834 | 45.664 | 63.261 | H |
| ATOM | 1738 | O  | HOH A | 1 | 42.414 | 45.698 | 18.020 | O |
| ATOM | 1739 | H1 | HOH A | 2 | 42.402 | 44.771 | 17.704 | H |
| ATOM | 1740 | H2 | HOH A | 3 | 42.423 | 45.684 | 19.000 | H |
| ATOM | 1741 | O  | HOH A | 1 | 42.448 | 45.567 | 40.111 | O |
| ATOM | 1742 | H1 | HOH A | 2 | 42.430 | 44.636 | 39.804 | H |
| ATOM | 1743 | H2 | HOH A | 3 | 42.453 | 45.562 | 41.091 | H |
| ATOM | 1744 | O  | HOH A | 1 | 42.417 | 45.802 | 62.233 | O |
| ATOM | 1745 | H1 | HOH A | 2 | 42.405 | 44.874 | 61.920 | H |
| ATOM | 1746 | H2 | HOH A | 3 | 42.420 | 45.791 | 63.213 | H |
| ATOM | 1747 | O  | HOH A | 1 | 65.026 | 45.570 | 17.997 | O |
| ATOM | 1748 | H1 | HOH A | 2 | 65.011 | 44.642 | 17.684 | H |
| ATOM | 1749 | H2 | HOH A | 3 | 65.039 | 45.559 | 18.977 | H |
| ATOM | 1750 | O  | HOH A | 1 | 65.008 | 45.602 | 40.151 | O |
| ATOM | 1751 | H1 | HOH A | 2 | 64.995 | 44.672 | 39.843 | H |
| ATOM | 1752 | H2 | HOH A | 3 | 65.017 | 45.596 | 41.131 | H |
| ATOM | 1753 | O  | HOH A | 1 | 64.999 | 45.667 | 62.278 | O |
| ATOM | 1754 | H1 | HOH A | 2 | 64.987 | 44.740 | 61.960 | H |
| ATOM | 1755 | H2 | HOH A | 3 | 65.005 | 45.651 | 63.258 | H |
| ATOM | 1756 | O  | HOH A | 1 | 22.093 | 26.059 | 18.090 | O |
| ATOM | 1757 | H1 | HOH A | 2 | 21.290 | 26.524 | 17.775 | H |
| ATOM | 1758 | H2 | HOH A | 3 | 22.083 | 26.068 | 19.070 | H |
| ATOM | 1759 | O  | HOH A | 1 | 22.089 | 26.008 | 40.203 | O |
| ATOM | 1760 | H1 | HOH A | 2 | 21.284 | 26.478 | 39.899 | H |
| ATOM | 1761 | H2 | HOH A | 3 | 22.089 | 26.012 | 41.183 | H |
| ATOM | 1762 | O  | HOH A | 1 | 22.114 | 26.127 | 62.301 | O |
| ATOM | 1763 | H1 | HOH A | 2 | 21.308 | 26.591 | 61.993 | H |
| ATOM | 1764 | H2 | HOH A | 3 | 22.115 | 26.140 | 63.281 | H |
| ATOM | 1765 | O  | HOH A | 1 | 44.721 | 26.114 | 18.004 | O |
| ATOM | 1766 | H1 | HOH A | 2 | 43.916 | 26.591 | 17.710 | H |

|      |      |    |       |   |        |        |        |   |
|------|------|----|-------|---|--------|--------|--------|---|
| ATOM | 1767 | H2 | HOH A | 3 | 44.734 | 26.119 | 18.984 | H |
| ATOM | 1768 | O  | HOH A | 1 | 44.741 | 25.988 | 40.139 | O |
| ATOM | 1769 | H1 | HOH A | 2 | 43.934 | 26.452 | 39.832 | H |
| ATOM | 1770 | H2 | HOH A | 3 | 44.743 | 25.999 | 41.119 | H |
| ATOM | 1771 | O  | HOH A | 1 | 44.696 | 26.234 | 62.254 | O |
| ATOM | 1772 | H1 | HOH A | 2 | 43.897 | 26.711 | 61.945 | H |
| ATOM | 1773 | H2 | HOH A | 3 | 44.696 | 26.245 | 63.233 | H |
| ATOM | 1774 | O  | HOH A | 1 | 67.306 | 25.997 | 18.033 | O |
| ATOM | 1775 | H1 | HOH A | 2 | 66.505 | 26.470 | 17.724 | H |
| ATOM | 1776 | H2 | HOH A | 3 | 67.305 | 26.009 | 19.013 | H |
| ATOM | 1777 | O  | HOH A | 1 | 67.296 | 26.023 | 40.178 | O |
| ATOM | 1778 | H1 | HOH A | 2 | 66.495 | 26.493 | 39.866 | H |
| ATOM | 1779 | H2 | HOH A | 3 | 67.296 | 26.042 | 41.158 | H |
| ATOM | 1780 | O  | HOH A | 1 | 67.296 | 26.088 | 62.297 | O |
| ATOM | 1781 | H1 | HOH A | 2 | 66.494 | 26.559 | 61.987 | H |
| ATOM | 1782 | H2 | HOH A | 3 | 67.292 | 26.096 | 63.277 | H |
| ATOM | 1783 | O  | HOH A | 1 | 3.993  | 26.036 | 18.051 | O |
| ATOM | 1784 | H1 | HOH A | 2 | 4.003  | 25.110 | 17.731 | H |
| ATOM | 1785 | H2 | HOH A | 3 | 4.808  | 26.477 | 17.731 | H |
| ATOM | 1786 | O  | HOH A | 1 | 3.970  | 26.060 | 40.224 | O |
| ATOM | 1787 | H1 | HOH A | 2 | 3.987  | 25.136 | 39.899 | H |
| ATOM | 1788 | H2 | HOH A | 3 | 4.783  | 26.507 | 39.907 | H |
| ATOM | 1789 | O  | HOH A | 1 | 3.995  | 26.116 | 62.322 | O |
| ATOM | 1790 | H1 | HOH A | 2 | 4.009  | 25.191 | 62.001 | H |
| ATOM | 1791 | H2 | HOH A | 3 | 4.804  | 26.563 | 61.996 | H |
| ATOM | 1792 | O  | HOH A | 1 | 26.581 | 26.132 | 18.096 | O |
| ATOM | 1793 | H1 | HOH A | 2 | 26.592 | 25.208 | 17.770 | H |
| ATOM | 1794 | H2 | HOH A | 3 | 27.391 | 26.577 | 17.771 | H |
| ATOM | 1795 | O  | HOH A | 1 | 26.584 | 26.059 | 40.201 | O |
| ATOM | 1796 | H1 | HOH A | 2 | 26.596 | 25.136 | 39.871 | H |
| ATOM | 1797 | H2 | HOH A | 3 | 27.395 | 26.505 | 39.878 | H |
| ATOM | 1798 | O  | HOH A | 1 | 26.595 | 26.209 | 62.304 | O |
| ATOM | 1799 | H1 | HOH A | 2 | 26.613 | 25.285 | 61.978 | H |
| ATOM | 1800 | H2 | HOH A | 3 | 27.401 | 26.661 | 61.978 | H |
| ATOM | 1801 | O  | HOH A | 1 | 49.198 | 26.144 | 18.008 | O |
| ATOM | 1802 | H1 | HOH A | 2 | 49.202 | 25.219 | 17.683 | H |

|      |      |    |       |   |        |        |        |   |
|------|------|----|-------|---|--------|--------|--------|---|
| ATOM | 1803 | H2 | HOH A | 3 | 50.007 | 26.585 | 17.676 | H |
| ATOM | 1804 | O  | HOH A | 1 | 49.221 | 26.058 | 40.153 | O |
| ATOM | 1805 | H1 | HOH A | 2 | 49.235 | 25.132 | 39.832 | H |
| ATOM | 1806 | H2 | HOH A | 3 | 50.029 | 26.504 | 39.824 | H |
| ATOM | 1807 | O  | HOH A | 1 | 49.176 | 26.255 | 62.271 | O |
| ATOM | 1808 | H1 | HOH A | 2 | 49.190 | 25.332 | 61.945 | H |
| ATOM | 1809 | H2 | HOH A | 3 | 49.993 | 26.699 | 61.960 | H |
| ATOM | 1810 | O  | HOH A | 1 | 8.558  | 26.006 | 18.078 | O |
| ATOM | 1811 | H1 | HOH A | 2 | 7.764  | 26.481 | 17.756 | H |
| ATOM | 1812 | H2 | HOH A | 3 | 8.534  | 26.005 | 19.058 | H |
| ATOM | 1813 | O  | HOH A | 1 | 8.513  | 26.043 | 40.238 | O |
| ATOM | 1814 | H1 | HOH A | 2 | 7.720  | 26.518 | 39.913 | H |
| ATOM | 1815 | H2 | HOH A | 3 | 8.492  | 26.051 | 41.217 | H |
| ATOM | 1816 | O  | HOH A | 1 | 8.547  | 26.077 | 62.333 | O |
| ATOM | 1817 | H1 | HOH A | 2 | 7.755  | 26.561 | 62.016 | H |
| ATOM | 1818 | H2 | HOH A | 3 | 8.528  | 26.074 | 63.312 | H |
| ATOM | 1819 | O  | HOH A | 1 | 31.154 | 26.131 | 18.102 | O |
| ATOM | 1820 | H1 | HOH A | 2 | 30.353 | 26.598 | 17.786 | H |
| ATOM | 1821 | H2 | HOH A | 3 | 31.137 | 26.130 | 19.082 | H |
| ATOM | 1822 | O  | HOH A | 1 | 31.149 | 26.007 | 40.201 | O |
| ATOM | 1823 | H1 | HOH A | 2 | 30.353 | 26.486 | 39.887 | H |
| ATOM | 1824 | H2 | HOH A | 3 | 31.134 | 26.005 | 41.180 | H |
| ATOM | 1825 | O  | HOH A | 1 | 31.142 | 26.220 | 62.306 | O |
| ATOM | 1826 | H1 | HOH A | 2 | 30.346 | 26.690 | 61.983 | H |
| ATOM | 1827 | H2 | HOH A | 3 | 31.123 | 26.229 | 63.286 | H |
| ATOM | 1828 | O  | HOH A | 1 | 53.741 | 26.086 | 18.037 | O |
| ATOM | 1829 | H1 | HOH A | 2 | 52.949 | 26.564 | 17.716 | H |
| ATOM | 1830 | H2 | HOH A | 3 | 53.719 | 26.086 | 19.016 | H |
| ATOM | 1831 | O  | HOH A | 1 | 53.774 | 26.037 | 40.164 | O |
| ATOM | 1832 | H1 | HOH A | 2 | 52.975 | 26.503 | 39.840 | H |
| ATOM | 1833 | H2 | HOH A | 3 | 53.752 | 26.044 | 41.144 | H |
| ATOM | 1834 | O  | HOH A | 1 | 53.728 | 26.197 | 62.290 | O |
| ATOM | 1835 | H1 | HOH A | 2 | 52.933 | 26.675 | 61.974 | H |
| ATOM | 1836 | H2 | HOH A | 3 | 53.707 | 26.188 | 63.270 | H |
| ATOM | 1837 | O  | HOH A | 1 | 13.049 | 26.022 | 18.047 | O |
| ATOM | 1838 | H1 | HOH A | 2 | 12.250 | 26.496 | 17.735 | H |

|      |      |    |       |   |        |        |        |   |
|------|------|----|-------|---|--------|--------|--------|---|
| ATOM | 1839 | H2 | HOH A | 3 | 13.042 | 26.031 | 19.027 | H |
| ATOM | 1840 | O  | HOH A | 1 | 13.004 | 26.026 | 40.182 | O |
| ATOM | 1841 | H1 | HOH A | 2 | 12.206 | 26.499 | 39.865 | H |
| ATOM | 1842 | H2 | HOH A | 3 | 12.998 | 26.046 | 41.162 | H |
| ATOM | 1843 | O  | HOH A | 1 | 13.053 | 26.087 | 62.269 | O |
| ATOM | 1844 | H1 | HOH A | 2 | 12.252 | 26.557 | 61.958 | H |
| ATOM | 1845 | H2 | HOH A | 3 | 13.045 | 26.092 | 63.249 | H |
| ATOM | 1846 | O  | HOH A | 1 | 35.643 | 26.132 | 18.012 | O |
| ATOM | 1847 | H1 | HOH A | 2 | 34.840 | 26.606 | 17.711 | H |
| ATOM | 1848 | H2 | HOH A | 3 | 35.643 | 26.128 | 18.992 | H |
| ATOM | 1849 | O  | HOH A | 1 | 35.661 | 26.001 | 40.131 | O |
| ATOM | 1850 | H1 | HOH A | 2 | 34.864 | 26.476 | 39.818 | H |
| ATOM | 1851 | H2 | HOH A | 3 | 35.657 | 26.014 | 41.111 | H |
| ATOM | 1852 | O  | HOH A | 1 | 35.644 | 26.237 | 62.248 | O |
| ATOM | 1853 | H1 | HOH A | 2 | 34.846 | 26.712 | 61.933 | H |
| ATOM | 1854 | H2 | HOH A | 3 | 35.632 | 26.242 | 63.228 | H |
| ATOM | 1855 | O  | HOH A | 1 | 58.243 | 26.054 | 17.952 | O |
| ATOM | 1856 | H1 | HOH A | 2 | 57.447 | 26.532 | 17.639 | H |
| ATOM | 1857 | H2 | HOH A | 3 | 58.231 | 26.057 | 18.932 | H |
| ATOM | 1858 | O  | HOH A | 1 | 58.251 | 26.039 | 40.132 | O |
| ATOM | 1859 | H1 | HOH A | 2 | 57.451 | 26.506 | 39.812 | H |
| ATOM | 1860 | H2 | HOH A | 3 | 58.238 | 26.053 | 41.112 | H |
| ATOM | 1861 | O  | HOH A | 1 | 58.232 | 26.145 | 62.244 | O |
| ATOM | 1862 | H1 | HOH A | 2 | 57.442 | 26.631 | 61.928 | H |
| ATOM | 1863 | H2 | HOH A | 3 | 58.219 | 26.149 | 63.224 | H |
| ATOM | 1864 | O  | HOH A | 1 | 17.547 | 26.036 | 18.074 | O |
| ATOM | 1865 | H1 | HOH A | 2 | 17.559 | 25.118 | 17.732 | H |
| ATOM | 1866 | H2 | HOH A | 3 | 18.348 | 26.493 | 17.744 | H |
| ATOM | 1867 | O  | HOH A | 1 | 17.511 | 26.025 | 40.216 | O |
| ATOM | 1868 | H1 | HOH A | 2 | 17.535 | 25.107 | 39.874 | H |
| ATOM | 1869 | H2 | HOH A | 3 | 18.311 | 26.490 | 39.893 | H |
| ATOM | 1870 | O  | HOH A | 1 | 17.548 | 26.111 | 62.297 | O |
| ATOM | 1871 | H1 | HOH A | 2 | 17.564 | 25.192 | 61.958 | H |
| ATOM | 1872 | H2 | HOH A | 3 | 18.349 | 26.570 | 61.967 | H |
| ATOM | 1873 | O  | HOH A | 1 | 40.149 | 26.144 | 18.020 | O |
| ATOM | 1874 | H1 | HOH A | 2 | 40.161 | 25.225 | 17.680 | H |



|      |      |    |       |   |        |        |        |   |
|------|------|----|-------|---|--------|--------|--------|---|
| ATOM | 1875 | H2 | HOH A | 3 | 40.955 | 26.598 | 17.696 | H |
| ATOM | 1876 | O  | HOH A | 1 | 40.177 | 26.006 | 40.148 | O |
| ATOM | 1877 | H1 | HOH A | 2 | 40.184 | 25.084 | 39.816 | H |
| ATOM | 1878 | H2 | HOH A | 3 | 40.980 | 26.456 | 39.812 | H |
| ATOM | 1879 | O  | HOH A | 1 | 40.141 | 26.246 | 62.251 | O |
| ATOM | 1880 | H1 | HOH A | 2 | 40.162 | 25.327 | 61.910 | H |
| ATOM | 1881 | H2 | HOH A | 3 | 40.940 | 26.709 | 61.923 | H |
| ATOM | 1882 | O  | HOH A | 1 | 62.749 | 26.026 | 17.991 | O |
| ATOM | 1883 | H1 | HOH A | 2 | 62.770 | 25.104 | 17.659 | H |
| ATOM | 1884 | H2 | HOH A | 3 | 63.552 | 26.483 | 17.665 | H |
| ATOM | 1885 | O  | HOH A | 1 | 62.734 | 26.050 | 40.169 | O |
| ATOM | 1886 | H1 | HOH A | 2 | 62.754 | 25.133 | 39.823 | H |
| ATOM | 1887 | H2 | HOH A | 3 | 63.539 | 26.511 | 39.851 | H |
| ATOM | 1888 | O  | HOH A | 1 | 62.737 | 26.130 | 62.289 | O |
| ATOM | 1889 | H1 | HOH A | 2 | 62.751 | 25.210 | 61.949 | H |
| ATOM | 1890 | H2 | HOH A | 3 | 63.540 | 26.586 | 61.960 | H |
| ATOM | 1891 | O  | HOH A | 1 | 1.756  | 29.941 | 18.031 | O |
| ATOM | 1892 | H1 | HOH A | 2 | 1.743  | 29.009 | 17.726 | H |
| ATOM | 1893 | H2 | HOH A | 3 | 1.750  | 29.938 | 19.011 | H |
| ATOM | 1894 | O  | HOH A | 1 | 1.738  | 29.974 | 40.183 | O |
| ATOM | 1895 | H1 | HOH A | 2 | 1.720  | 29.043 | 39.879 | H |
| ATOM | 1896 | H2 | HOH A | 3 | 1.734  | 29.973 | 41.163 | H |
| ATOM | 1897 | O  | HOH A | 1 | 1.744  | 30.017 | 62.291 | O |
| ATOM | 1898 | H1 | HOH A | 2 | 1.733  | 29.087 | 61.984 | H |
| ATOM | 1899 | H2 | HOH A | 3 | 1.749  | 30.013 | 63.271 | H |
| ATOM | 1900 | O  | HOH A | 1 | 24.347 | 30.011 | 18.077 | O |
| ATOM | 1901 | H1 | HOH A | 2 | 24.330 | 29.080 | 17.771 | H |
| ATOM | 1902 | H2 | HOH A | 3 | 24.342 | 30.009 | 19.057 | H |
| ATOM | 1903 | O  | HOH A | 1 | 24.333 | 29.956 | 40.199 | O |
| ATOM | 1904 | H1 | HOH A | 2 | 24.324 | 29.026 | 39.892 | H |
| ATOM | 1905 | H2 | HOH A | 3 | 24.328 | 29.952 | 41.179 | H |
| ATOM | 1906 | O  | HOH A | 1 | 24.359 | 30.096 | 62.296 | O |
| ATOM | 1907 | H1 | HOH A | 2 | 24.344 | 29.162 | 61.999 | H |
| ATOM | 1908 | H2 | HOH A | 3 | 24.352 | 30.102 | 63.276 | H |
| ATOM | 1909 | O  | HOH A | 1 | 46.960 | 30.063 | 17.985 | O |
| ATOM | 1910 | H1 | HOH A | 2 | 46.945 | 29.131 | 17.682 | H |

|      |      |    |       |   |        |        |        |   |
|------|------|----|-------|---|--------|--------|--------|---|
| ATOM | 1911 | H2 | HOH A | 3 | 46.955 | 30.063 | 18.964 | H |
| ATOM | 1912 | O  | HOH A | 1 | 46.983 | 29.956 | 40.127 | O |
| ATOM | 1913 | H1 | HOH A | 2 | 46.961 | 29.024 | 39.826 | H |
| ATOM | 1914 | H2 | HOH A | 3 | 46.975 | 29.959 | 41.106 | H |
| ATOM | 1915 | O  | HOH A | 1 | 46.940 | 30.177 | 62.239 | O |
| ATOM | 1916 | H1 | HOH A | 2 | 46.920 | 29.245 | 61.937 | H |
| ATOM | 1917 | H2 | HOH A | 3 | 46.935 | 30.177 | 63.219 | H |
| ATOM | 1918 | O  | HOH A | 1 | 6.299  | 29.907 | 18.075 | O |
| ATOM | 1919 | H1 | HOH A | 2 | 5.485  | 30.352 | 17.761 | H |
| ATOM | 1920 | H2 | HOH A | 3 | 6.293  | 29.921 | 19.055 | H |
| ATOM | 1921 | O  | HOH A | 1 | 6.264  | 29.940 | 40.226 | O |
| ATOM | 1922 | H1 | HOH A | 2 | 5.460  | 30.399 | 39.907 | H |
| ATOM | 1923 | H2 | HOH A | 3 | 6.252  | 29.955 | 41.206 | H |
| ATOM | 1924 | O  | HOH A | 1 | 6.289  | 29.979 | 62.333 | O |
| ATOM | 1925 | H1 | HOH A | 2 | 5.474  | 30.431 | 62.031 | H |
| ATOM | 1926 | H2 | HOH A | 3 | 6.289  | 29.976 | 63.313 | H |
| ATOM | 1927 | O  | HOH A | 1 | 28.894 | 30.010 | 18.103 | O |
| ATOM | 1928 | H1 | HOH A | 2 | 28.083 | 30.462 | 17.789 | H |
| ATOM | 1929 | H2 | HOH A | 3 | 28.887 | 30.019 | 19.083 | H |
| ATOM | 1930 | O  | HOH A | 1 | 28.885 | 29.918 | 40.226 | O |
| ATOM | 1931 | H1 | HOH A | 2 | 28.073 | 30.372 | 39.919 | H |
| ATOM | 1932 | H2 | HOH A | 3 | 28.887 | 29.928 | 41.206 | H |
| ATOM | 1933 | O  | HOH A | 1 | 28.910 | 30.112 | 62.308 | O |
| ATOM | 1934 | H1 | HOH A | 2 | 28.096 | 30.561 | 61.998 | H |
| ATOM | 1935 | H2 | HOH A | 3 | 28.908 | 30.125 | 63.288 | H |
| ATOM | 1936 | O  | HOH A | 1 | 51.496 | 30.000 | 18.015 | O |
| ATOM | 1937 | H1 | HOH A | 2 | 50.688 | 30.457 | 17.703 | H |
| ATOM | 1938 | H2 | HOH A | 3 | 51.488 | 30.004 | 18.994 | H |
| ATOM | 1939 | O  | HOH A | 1 | 51.532 | 29.933 | 40.153 | O |
| ATOM | 1940 | H1 | HOH A | 2 | 50.728 | 30.387 | 39.825 | H |
| ATOM | 1941 | H2 | HOH A | 3 | 51.513 | 29.953 | 41.132 | H |
| ATOM | 1942 | O  | HOH A | 1 | 51.490 | 30.120 | 62.278 | O |
| ATOM | 1943 | H1 | HOH A | 2 | 50.686 | 30.587 | 61.967 | H |
| ATOM | 1944 | H2 | HOH A | 3 | 51.483 | 30.124 | 63.258 | H |
| ATOM | 1945 | O  | HOH A | 1 | 10.775 | 29.963 | 18.109 | O |
| ATOM | 1946 | H1 | HOH A | 2 | 10.756 | 29.047 | 17.762 | H |

|      |      |    |       |   |        |        |        |   |
|------|------|----|-------|---|--------|--------|--------|---|
| ATOM | 1947 | H2 | HOH A | 3 | 9.967  | 30.422 | 17.797 | H |
| ATOM | 1948 | O  | HOH A | 1 | 10.750 | 29.996 | 40.243 | O |
| ATOM | 1949 | H1 | HOH A | 2 | 10.729 | 29.079 | 39.900 | H |
| ATOM | 1950 | H2 | HOH A | 3 | 9.940  | 30.454 | 39.934 | H |
| ATOM | 1951 | O  | HOH A | 1 | 10.765 | 30.035 | 62.344 | O |
| ATOM | 1952 | H1 | HOH A | 2 | 10.742 | 29.120 | 61.994 | H |
| ATOM | 1953 | H2 | HOH A | 3 | 9.961  | 30.499 | 62.031 | H |
| ATOM | 1954 | O  | HOH A | 1 | 33.368 | 30.093 | 18.091 | O |
| ATOM | 1955 | H1 | HOH A | 2 | 33.348 | 29.178 | 17.742 | H |
| ATOM | 1956 | H2 | HOH A | 3 | 32.562 | 30.555 | 17.777 | H |
| ATOM | 1957 | O  | HOH A | 1 | 33.396 | 29.959 | 40.204 | O |
| ATOM | 1958 | H1 | HOH A | 2 | 33.375 | 29.040 | 39.864 | H |
| ATOM | 1959 | H2 | HOH A | 3 | 32.590 | 30.417 | 39.887 | H |
| ATOM | 1960 | O  | HOH A | 1 | 33.388 | 30.189 | 62.298 | O |
| ATOM | 1961 | H1 | HOH A | 2 | 33.359 | 29.272 | 61.953 | H |
| ATOM | 1962 | H2 | HOH A | 3 | 32.582 | 30.654 | 61.990 | H |
| ATOM | 1963 | O  | HOH A | 1 | 55.974 | 30.015 | 18.016 | O |
| ATOM | 1964 | H1 | HOH A | 2 | 55.951 | 29.097 | 17.673 | H |
| ATOM | 1965 | H2 | HOH A | 3 | 55.165 | 30.474 | 17.706 | H |
| ATOM | 1966 | O  | HOH A | 1 | 55.997 | 29.978 | 40.177 | O |
| ATOM | 1967 | H1 | HOH A | 2 | 55.976 | 29.061 | 39.833 | H |
| ATOM | 1968 | H2 | HOH A | 3 | 55.193 | 30.439 | 39.859 | H |
| ATOM | 1969 | O  | HOH A | 1 | 55.964 | 30.122 | 62.298 | O |
| ATOM | 1970 | H1 | HOH A | 2 | 55.941 | 29.208 | 61.944 | H |
| ATOM | 1971 | H2 | HOH A | 3 | 55.162 | 30.589 | 61.981 | H |
| ATOM | 1972 | O  | HOH A | 1 | 15.294 | 29.981 | 18.074 | O |
| ATOM | 1973 | H1 | HOH A | 2 | 15.291 | 29.060 | 17.739 | H |
| ATOM | 1974 | H2 | HOH A | 3 | 15.289 | 29.948 | 19.053 | H |
| ATOM | 1975 | O  | HOH A | 1 | 15.261 | 29.971 | 40.196 | O |
| ATOM | 1976 | H1 | HOH A | 2 | 15.255 | 29.045 | 39.876 | H |
| ATOM | 1977 | H2 | HOH A | 3 | 15.253 | 29.952 | 41.176 | H |
| ATOM | 1978 | O  | HOH A | 1 | 15.301 | 30.031 | 62.294 | O |
| ATOM | 1979 | H1 | HOH A | 2 | 15.304 | 29.109 | 61.963 | H |
| ATOM | 1980 | H2 | HOH A | 3 | 15.295 | 30.002 | 63.273 | H |
| ATOM | 1981 | O  | HOH A | 1 | 37.894 | 30.075 | 18.037 | O |
| ATOM | 1982 | H1 | HOH A | 2 | 37.896 | 29.154 | 17.700 | H |

|      |      |    |       |   |        |        |        |   |
|------|------|----|-------|---|--------|--------|--------|---|
| ATOM | 1983 | H2 | HOH A | 3 | 37.895 | 30.038 | 19.017 | H |
| ATOM | 1984 | O  | HOH A | 1 | 37.919 | 29.942 | 40.144 | O |
| ATOM | 1985 | H1 | HOH A | 2 | 37.914 | 29.016 | 39.824 | H |
| ATOM | 1986 | H2 | HOH A | 3 | 37.913 | 29.925 | 41.124 | H |
| ATOM | 1987 | O  | HOH A | 1 | 37.888 | 30.185 | 62.255 | O |
| ATOM | 1988 | H1 | HOH A | 2 | 37.892 | 29.259 | 61.936 | H |
| ATOM | 1989 | H2 | HOH A | 3 | 37.876 | 30.168 | 63.235 | H |
| ATOM | 1990 | O  | HOH A | 1 | 60.489 | 29.974 | 17.995 | O |
| ATOM | 1991 | H1 | HOH A | 2 | 60.495 | 29.050 | 17.667 | H |
| ATOM | 1992 | H2 | HOH A | 3 | 60.487 | 29.947 | 18.974 | H |
| ATOM | 1993 | O  | HOH A | 1 | 60.484 | 29.989 | 40.149 | O |
| ATOM | 1994 | H1 | HOH A | 2 | 60.482 | 29.063 | 39.830 | H |
| ATOM | 1995 | H2 | HOH A | 3 | 60.481 | 29.972 | 41.129 | H |
| ATOM | 1996 | O  | HOH A | 1 | 60.477 | 30.064 | 62.275 | O |
| ATOM | 1997 | H1 | HOH A | 2 | 60.473 | 29.139 | 61.950 | H |
| ATOM | 1998 | H2 | HOH A | 3 | 60.474 | 30.040 | 63.255 | H |
| ATOM | 1999 | O  | HOH A | 1 | 19.826 | 29.956 | 18.108 | O |
| ATOM | 2000 | H1 | HOH A | 2 | 20.620 | 30.425 | 17.777 | H |
| ATOM | 2001 | H2 | HOH A | 3 | 19.847 | 29.979 | 19.088 | H |
| ATOM | 2002 | O  | HOH A | 1 | 19.805 | 29.928 | 40.219 | O |
| ATOM | 2003 | H1 | HOH A | 2 | 20.605 | 30.383 | 39.881 | H |
| ATOM | 2004 | H2 | HOH A | 3 | 19.834 | 29.955 | 41.198 | H |
| ATOM | 2005 | O  | HOH A | 1 | 19.847 | 30.024 | 62.316 | O |
| ATOM | 2006 | H1 | HOH A | 2 | 20.643 | 30.491 | 61.987 | H |
| ATOM | 2007 | H2 | HOH A | 3 | 19.866 | 30.047 | 63.295 | H |
| ATOM | 2008 | O  | HOH A | 1 | 42.448 | 30.040 | 18.030 | O |
| ATOM | 2009 | H1 | HOH A | 2 | 43.246 | 30.499 | 17.692 | H |
| ATOM | 2010 | H2 | HOH A | 3 | 42.481 | 30.058 | 19.009 | H |
| ATOM | 2011 | O  | HOH A | 1 | 42.477 | 29.901 | 40.152 | O |
| ATOM | 2012 | H1 | HOH A | 2 | 43.274 | 30.361 | 39.816 | H |
| ATOM | 2013 | H2 | HOH A | 3 | 42.499 | 29.933 | 41.131 | H |
| ATOM | 2014 | O  | HOH A | 1 | 42.428 | 30.148 | 62.266 | O |
| ATOM | 2015 | H1 | HOH A | 2 | 43.231 | 30.604 | 61.938 | H |
| ATOM | 2016 | H2 | HOH A | 3 | 42.446 | 30.170 | 63.245 | H |
| ATOM | 2017 | O  | HOH A | 1 | 65.029 | 29.917 | 18.025 | O |
| ATOM | 2018 | H1 | HOH A | 2 | 65.830 | 30.375 | 17.696 | H |

|      |      |    |       |   |        |        |        |   |
|------|------|----|-------|---|--------|--------|--------|---|
| ATOM | 2019 | H2 | HOH A | 3 | 65.053 | 29.933 | 19.005 | H |
| ATOM | 2020 | O  | HOH A | 1 | 65.025 | 29.947 | 40.192 | O |
| ATOM | 2021 | H1 | HOH A | 2 | 65.824 | 30.404 | 39.856 | H |
| ATOM | 2022 | H2 | HOH A | 3 | 65.046 | 29.980 | 41.171 | H |
| ATOM | 2023 | O  | HOH A | 1 | 65.020 | 30.013 | 62.314 | O |
| ATOM | 2024 | H1 | HOH A | 2 | 65.819 | 30.474 | 61.984 | H |
| ATOM | 2025 | H2 | HOH A | 3 | 65.043 | 30.028 | 63.293 | H |
| ATOM | 2026 | O  | HOH A | 1 | 22.064 | 33.875 | 18.083 | O |
| ATOM | 2027 | H1 | HOH A | 2 | 21.276 | 34.357 | 17.754 | H |
| ATOM | 2028 | H2 | HOH A | 3 | 22.862 | 34.337 | 17.751 | H |
| ATOM | 2029 | O  | HOH A | 1 | 22.042 | 33.827 | 40.181 | O |
| ATOM | 2030 | H1 | HOH A | 2 | 21.254 | 34.308 | 39.851 | H |
| ATOM | 2031 | H2 | HOH A | 3 | 22.840 | 34.284 | 39.842 | H |
| ATOM | 2032 | O  | HOH A | 1 | 22.067 | 33.956 | 62.280 | O |
| ATOM | 2033 | H1 | HOH A | 2 | 21.279 | 34.436 | 61.948 | H |
| ATOM | 2034 | H2 | HOH A | 3 | 22.864 | 34.421 | 61.952 | H |
| ATOM | 2035 | O  | HOH A | 1 | 44.657 | 33.941 | 17.986 | O |
| ATOM | 2036 | H1 | HOH A | 2 | 43.869 | 34.420 | 17.654 | H |
| ATOM | 2037 | H2 | HOH A | 3 | 45.454 | 34.398 | 17.646 | H |
| ATOM | 2038 | O  | HOH A | 1 | 44.695 | 33.819 | 40.112 | O |
| ATOM | 2039 | H1 | HOH A | 2 | 43.904 | 34.296 | 39.784 | H |
| ATOM | 2040 | H2 | HOH A | 3 | 45.489 | 34.280 | 39.770 | H |
| ATOM | 2041 | O  | HOH A | 1 | 44.643 | 34.049 | 62.216 | O |
| ATOM | 2042 | H1 | HOH A | 2 | 43.860 | 34.534 | 61.884 | H |
| ATOM | 2043 | H2 | HOH A | 3 | 45.445 | 34.507 | 61.887 | H |
| ATOM | 2044 | O  | HOH A | 1 | 67.266 | 33.816 | 17.994 | O |
| ATOM | 2045 | H1 | HOH A | 2 | 66.483 | 34.298 | 17.655 | H |
| ATOM | 2046 | H2 | HOH A | 3 | 68.069 | 34.272 | 17.665 | H |
| ATOM | 2047 | O  | HOH A | 1 | 67.239 | 33.850 | 40.156 | O |
| ATOM | 2048 | H1 | HOH A | 2 | 66.455 | 34.328 | 39.814 | H |
| ATOM | 2049 | H2 | HOH A | 3 | 68.040 | 34.310 | 39.828 | H |
| ATOM | 2050 | O  | HOH A | 1 | 67.249 | 33.897 | 62.277 | O |
| ATOM | 2051 | H1 | HOH A | 2 | 66.464 | 34.384 | 61.950 | H |
| ATOM | 2052 | H2 | HOH A | 3 | 68.050 | 34.353 | 61.942 | H |
| ATOM | 2053 | O  | HOH A | 1 | 4.039  | 33.813 | 18.014 | O |
| ATOM | 2054 | H1 | HOH A | 2 | 4.833  | 34.289 | 17.695 | H |

|      |      |    |       |   |        |        |        |   |
|------|------|----|-------|---|--------|--------|--------|---|
| ATOM | 2055 | H2 | HOH A | 3 | 4.052  | 33.825 | 18.994 | H |
| ATOM | 2056 | O  | HOH A | 1 | 3.994  | 33.854 | 40.172 | O |
| ATOM | 2057 | H1 | HOH A | 2 | 4.785  | 34.336 | 39.852 | H |
| ATOM | 2058 | H2 | HOH A | 3 | 4.012  | 33.860 | 41.152 | H |
| ATOM | 2059 | O  | HOH A | 1 | 4.015  | 33.895 | 62.282 | O |
| ATOM | 2060 | H1 | HOH A | 2 | 4.808  | 34.373 | 61.962 | H |
| ATOM | 2061 | H2 | HOH A | 3 | 4.036  | 33.897 | 63.262 | H |
| ATOM | 2062 | O  | HOH A | 1 | 26.625 | 33.912 | 18.073 | O |
| ATOM | 2063 | H1 | HOH A | 2 | 27.416 | 34.393 | 17.751 | H |
| ATOM | 2064 | H2 | HOH A | 3 | 26.647 | 33.914 | 19.053 | H |
| ATOM | 2065 | O  | HOH A | 1 | 26.624 | 33.833 | 40.169 | O |
| ATOM | 2066 | H1 | HOH A | 2 | 27.418 | 34.311 | 39.850 | H |
| ATOM | 2067 | H2 | HOH A | 3 | 26.638 | 33.843 | 41.149 | H |
| ATOM | 2068 | O  | HOH A | 1 | 26.620 | 34.002 | 62.277 | O |
| ATOM | 2069 | H1 | HOH A | 2 | 27.410 | 34.488 | 61.959 | H |
| ATOM | 2070 | H2 | HOH A | 3 | 26.637 | 34.007 | 63.257 | H |
| ATOM | 2071 | O  | HOH A | 1 | 49.219 | 33.921 | 17.953 | O |
| ATOM | 2072 | H1 | HOH A | 2 | 50.016 | 34.396 | 17.635 | H |
| ATOM | 2073 | H2 | HOH A | 3 | 49.244 | 33.911 | 18.932 | H |
| ATOM | 2074 | O  | HOH A | 1 | 49.257 | 33.836 | 40.104 | O |
| ATOM | 2075 | H1 | HOH A | 2 | 50.050 | 34.312 | 39.780 | H |
| ATOM | 2076 | H2 | HOH A | 3 | 49.270 | 33.857 | 41.084 | H |
| ATOM | 2077 | O  | HOH A | 1 | 49.210 | 34.037 | 62.232 | O |
| ATOM | 2078 | H1 | HOH A | 2 | 50.004 | 34.513 | 61.910 | H |
| ATOM | 2079 | H2 | HOH A | 3 | 49.230 | 34.043 | 63.212 | H |
| ATOM | 2080 | O  | HOH A | 1 | 8.550  | 33.887 | 18.049 | O |
| ATOM | 2081 | H1 | HOH A | 2 | 7.746  | 34.338 | 17.718 | H |
| ATOM | 2082 | H2 | HOH A | 3 | 8.523  | 33.901 | 19.029 | H |
| ATOM | 2083 | O  | HOH A | 1 | 8.496  | 33.911 | 40.195 | O |
| ATOM | 2084 | H1 | HOH A | 2 | 7.695  | 34.364 | 39.859 | H |
| ATOM | 2085 | H2 | HOH A | 3 | 8.467  | 33.931 | 41.175 | H |
| ATOM | 2086 | O  | HOH A | 1 | 8.531  | 33.960 | 62.287 | O |
| ATOM | 2087 | H1 | HOH A | 2 | 7.726  | 34.415 | 61.963 | H |
| ATOM | 2088 | H2 | HOH A | 3 | 8.508  | 33.964 | 63.267 | H |
| ATOM | 2089 | O  | HOH A | 1 | 31.123 | 34.004 | 18.050 | O |
| ATOM | 2090 | H1 | HOH A | 2 | 30.319 | 34.458 | 17.720 | H |

|      |      |    |       |   |        |        |        |   |
|------|------|----|-------|---|--------|--------|--------|---|
| ATOM | 2091 | H2 | HOH A | 3 | 31.092 | 34.008 | 19.029 | H |
| ATOM | 2092 | O  | HOH A | 1 | 31.144 | 33.894 | 40.163 | O |
| ATOM | 2093 | H1 | HOH A | 2 | 30.334 | 34.341 | 39.840 | H |
| ATOM | 2094 | H2 | HOH A | 3 | 31.127 | 33.908 | 41.143 | H |
| ATOM | 2095 | O  | HOH A | 1 | 31.128 | 34.100 | 62.271 | O |
| ATOM | 2096 | H1 | HOH A | 2 | 30.321 | 34.549 | 61.944 | H |
| ATOM | 2097 | H2 | HOH A | 3 | 31.101 | 34.104 | 63.251 | H |
| ATOM | 2098 | O  | HOH A | 1 | 53.740 | 33.964 | 17.972 | O |
| ATOM | 2099 | H1 | HOH A | 2 | 52.937 | 34.421 | 17.647 | H |
| ATOM | 2100 | H2 | HOH A | 3 | 53.718 | 33.972 | 18.952 | H |
| ATOM | 2101 | O  | HOH A | 1 | 53.767 | 33.916 | 40.123 | O |
| ATOM | 2102 | H1 | HOH A | 2 | 52.963 | 34.366 | 39.790 | H |
| ATOM | 2103 | H2 | HOH A | 3 | 53.740 | 33.933 | 41.102 | H |
| ATOM | 2104 | O  | HOH A | 1 | 53.710 | 34.074 | 62.231 | O |
| ATOM | 2105 | H1 | HOH A | 2 | 52.911 | 34.536 | 61.903 | H |
| ATOM | 2106 | H2 | HOH A | 3 | 53.684 | 34.082 | 63.211 | H |
| ATOM | 2107 | O  | HOH A | 1 | 13.031 | 33.861 | 18.104 | O |
| ATOM | 2108 | H1 | HOH A | 2 | 13.019 | 32.938 | 17.776 | H |
| ATOM | 2109 | H2 | HOH A | 3 | 13.834 | 34.298 | 17.749 | H |
| ATOM | 2110 | O  | HOH A | 1 | 12.987 | 33.889 | 40.222 | O |
| ATOM | 2111 | H1 | HOH A | 2 | 12.980 | 32.964 | 39.897 | H |
| ATOM | 2112 | H2 | HOH A | 3 | 13.795 | 34.324 | 39.879 | H |
| ATOM | 2113 | O  | HOH A | 1 | 13.027 | 33.933 | 62.310 | O |
| ATOM | 2114 | H1 | HOH A | 2 | 13.008 | 33.011 | 61.980 | H |
| ATOM | 2115 | H2 | HOH A | 3 | 13.836 | 34.363 | 61.963 | H |
| ATOM | 2116 | O  | HOH A | 1 | 35.626 | 33.995 | 18.071 | O |
| ATOM | 2117 | H1 | HOH A | 2 | 35.609 | 33.069 | 17.751 | H |
| ATOM | 2118 | H2 | HOH A | 3 | 36.430 | 34.425 | 17.711 | H |
| ATOM | 2119 | O  | HOH A | 1 | 35.648 | 33.865 | 40.165 | O |
| ATOM | 2120 | H1 | HOH A | 2 | 35.636 | 32.939 | 39.844 | H |
| ATOM | 2121 | H2 | HOH A | 3 | 36.453 | 34.297 | 39.811 | H |
| ATOM | 2122 | O  | HOH A | 1 | 35.624 | 34.083 | 62.295 | O |
| ATOM | 2123 | H1 | HOH A | 2 | 35.607 | 33.162 | 61.960 | H |
| ATOM | 2124 | H2 | HOH A | 3 | 36.429 | 34.518 | 61.946 | H |
| ATOM | 2125 | O  | HOH A | 1 | 58.224 | 33.901 | 18.013 | O |
| ATOM | 2126 | H1 | HOH A | 2 | 58.212 | 32.977 | 17.687 | H |

|      |      |    |       |   |        |        |        |   |
|------|------|----|-------|---|--------|--------|--------|---|
| ATOM | 2127 | H2 | HOH A | 3 | 59.031 | 34.335 | 17.665 | H |
| ATOM | 2128 | O  | HOH A | 1 | 58.227 | 33.898 | 40.172 | O |
| ATOM | 2129 | H1 | HOH A | 2 | 58.215 | 32.974 | 39.844 | H |
| ATOM | 2130 | H2 | HOH A | 3 | 59.036 | 34.331 | 39.829 | H |
| ATOM | 2131 | O  | HOH A | 1 | 58.218 | 34.004 | 62.286 | O |
| ATOM | 2132 | H1 | HOH A | 2 | 58.202 | 33.080 | 61.958 | H |
| ATOM | 2133 | H2 | HOH A | 3 | 59.026 | 34.435 | 61.937 | H |
| ATOM | 2134 | O  | HOH A | 1 | 17.551 | 33.874 | 18.109 | O |
| ATOM | 2135 | H1 | HOH A | 2 | 17.553 | 32.948 | 17.789 | H |
| ATOM | 2136 | H2 | HOH A | 3 | 17.553 | 33.857 | 19.089 | H |
| ATOM | 2137 | O  | HOH A | 1 | 17.529 | 33.869 | 40.213 | O |
| ATOM | 2138 | H1 | HOH A | 2 | 17.527 | 32.939 | 39.904 | H |
| ATOM | 2139 | H2 | HOH A | 3 | 17.536 | 33.863 | 41.193 | H |
| ATOM | 2140 | O  | HOH A | 1 | 17.563 | 33.956 | 62.300 | O |
| ATOM | 2141 | H1 | HOH A | 2 | 17.560 | 33.024 | 61.994 | H |
| ATOM | 2142 | H2 | HOH A | 3 | 17.563 | 33.953 | 63.280 | H |
| ATOM | 2143 | O  | HOH A | 1 | 40.153 | 33.981 | 18.030 | O |
| ATOM | 2144 | H1 | HOH A | 2 | 40.148 | 33.049 | 17.725 | H |
| ATOM | 2145 | H2 | HOH A | 3 | 40.159 | 33.978 | 19.010 | H |
| ATOM | 2146 | O  | HOH A | 1 | 40.185 | 33.842 | 40.146 | O |
| ATOM | 2147 | H1 | HOH A | 2 | 40.183 | 32.910 | 39.841 | H |
| ATOM | 2148 | H2 | HOH A | 3 | 40.194 | 33.840 | 41.125 | H |
| ATOM | 2149 | O  | HOH A | 1 | 40.147 | 34.092 | 62.263 | O |
| ATOM | 2150 | H1 | HOH A | 2 | 40.154 | 33.163 | 61.951 | H |
| ATOM | 2151 | H2 | HOH A | 3 | 40.146 | 34.082 | 63.243 | H |
| ATOM | 2152 | O  | HOH A | 1 | 62.759 | 33.864 | 18.003 | O |
| ATOM | 2153 | H1 | HOH A | 2 | 62.747 | 32.934 | 17.692 | H |
| ATOM | 2154 | H2 | HOH A | 3 | 62.764 | 33.855 | 18.983 | H |
| ATOM | 2155 | O  | HOH A | 1 | 62.744 | 33.871 | 40.177 | O |
| ATOM | 2156 | H1 | HOH A | 2 | 62.742 | 32.941 | 39.868 | H |
| ATOM | 2157 | H2 | HOH A | 3 | 62.745 | 33.865 | 41.157 | H |
| ATOM | 2158 | O  | HOH A | 1 | 62.733 | 33.958 | 62.288 | O |
| ATOM | 2159 | H1 | HOH A | 2 | 62.728 | 33.028 | 61.979 | H |
| ATOM | 2160 | H2 | HOH A | 3 | 62.740 | 33.951 | 63.268 | H |
| ATOM | 2161 | O  | HOH A | 1 | 1.731  | 37.720 | 18.035 | O |
| ATOM | 2162 | H1 | HOH A | 2 | 1.751  | 36.800 | 17.699 | H |



|      |      |    |       |   |        |        |        |   |
|------|------|----|-------|---|--------|--------|--------|---|
| ATOM | 2163 | H2 | HOH A | 3 | 2.533  | 38.179 | 17.709 | H |
| ATOM | 2164 | O  | HOH A | 1 | 1.711  | 37.765 | 40.182 | O |
| ATOM | 2165 | H1 | HOH A | 2 | 1.732  | 36.843 | 39.849 | H |
| ATOM | 2166 | H2 | HOH A | 3 | 2.514  | 38.223 | 39.858 | H |
| ATOM | 2167 | O  | HOH A | 1 | 1.717  | 37.806 | 62.304 | O |
| ATOM | 2168 | H1 | HOH A | 2 | 1.735  | 36.887 | 61.964 | H |
| ATOM | 2169 | H2 | HOH A | 3 | 2.519  | 38.265 | 61.976 | H |
| ATOM | 2170 | O  | HOH A | 1 | 24.332 | 37.818 | 18.078 | O |
| ATOM | 2171 | H1 | HOH A | 2 | 24.358 | 36.895 | 17.748 | H |
| ATOM | 2172 | H2 | HOH A | 3 | 25.132 | 38.279 | 17.750 | H |
| ATOM | 2173 | O  | HOH A | 1 | 24.321 | 37.733 | 40.196 | O |
| ATOM | 2174 | H1 | HOH A | 2 | 24.333 | 36.811 | 39.865 | H |
| ATOM | 2175 | H2 | HOH A | 3 | 25.125 | 38.185 | 39.864 | H |
| ATOM | 2176 | O  | HOH A | 1 | 24.332 | 37.896 | 62.291 | O |
| ATOM | 2177 | H1 | HOH A | 2 | 24.354 | 36.975 | 61.958 | H |
| ATOM | 2178 | H2 | HOH A | 3 | 25.133 | 38.356 | 61.964 | H |
| ATOM | 2179 | O  | HOH A | 1 | 46.927 | 37.851 | 17.995 | O |
| ATOM | 2180 | H1 | HOH A | 2 | 46.943 | 36.928 | 17.666 | H |
| ATOM | 2181 | H2 | HOH A | 3 | 47.731 | 38.304 | 17.665 | H |
| ATOM | 2182 | O  | HOH A | 1 | 46.959 | 37.740 | 40.117 | O |
| ATOM | 2183 | H1 | HOH A | 2 | 46.979 | 36.821 | 39.779 | H |
| ATOM | 2184 | H2 | HOH A | 3 | 47.764 | 38.199 | 39.797 | H |
| ATOM | 2185 | O  | HOH A | 1 | 46.932 | 37.958 | 62.240 | O |
| ATOM | 2186 | H1 | HOH A | 2 | 46.948 | 37.036 | 61.909 | H |
| ATOM | 2187 | H2 | HOH A | 3 | 47.736 | 38.412 | 61.910 | H |
| ATOM | 2188 | O  | HOH A | 1 | 6.271  | 37.723 | 18.071 | O |
| ATOM | 2189 | H1 | HOH A | 2 | 5.477  | 38.196 | 17.746 | H |
| ATOM | 2190 | H2 | HOH A | 3 | 7.063  | 38.204 | 17.750 | H |
| ATOM | 2191 | O  | HOH A | 1 | 6.233  | 37.773 | 40.217 | O |
| ATOM | 2192 | H1 | HOH A | 2 | 5.438  | 38.239 | 39.884 | H |
| ATOM | 2193 | H2 | HOH A | 3 | 7.024  | 38.253 | 39.894 | H |
| ATOM | 2194 | O  | HOH A | 1 | 6.261  | 37.807 | 62.327 | O |
| ATOM | 2195 | H1 | HOH A | 2 | 5.465  | 38.284 | 62.010 | H |
| ATOM | 2196 | H2 | HOH A | 3 | 7.051  | 38.289 | 62.006 | H |
| ATOM | 2197 | O  | HOH A | 1 | 28.857 | 37.840 | 18.091 | O |
| ATOM | 2198 | H1 | HOH A | 2 | 28.061 | 38.311 | 17.769 | H |

|      |      |    |       |   |        |        |        |   |
|------|------|----|-------|---|--------|--------|--------|---|
| ATOM | 2199 | H2 | HOH A | 3 | 29.646 | 38.323 | 17.768 | H |
| ATOM | 2200 | O  | HOH A | 1 | 28.871 | 37.735 | 40.198 | O |
| ATOM | 2201 | H1 | HOH A | 2 | 28.078 | 38.208 | 39.869 | H |
| ATOM | 2202 | H2 | HOH A | 3 | 29.663 | 38.212 | 39.875 | H |
| ATOM | 2203 | O  | HOH A | 1 | 28.884 | 37.936 | 62.304 | O |
| ATOM | 2204 | H1 | HOH A | 2 | 28.090 | 38.410 | 61.981 | H |
| ATOM | 2205 | H2 | HOH A | 3 | 29.676 | 38.416 | 61.983 | H |
| ATOM | 2206 | O  | HOH A | 1 | 51.474 | 37.819 | 17.995 | O |
| ATOM | 2207 | H1 | HOH A | 2 | 50.682 | 38.296 | 17.668 | H |
| ATOM | 2208 | H2 | HOH A | 3 | 52.268 | 38.295 | 17.674 | H |
| ATOM | 2209 | O  | HOH A | 1 | 51.504 | 37.749 | 40.142 | O |
| ATOM | 2210 | H1 | HOH A | 2 | 50.709 | 38.222 | 39.817 | H |
| ATOM | 2211 | H2 | HOH A | 3 | 52.294 | 38.229 | 39.818 | H |
| ATOM | 2212 | O  | HOH A | 1 | 51.454 | 37.952 | 62.274 | O |
| ATOM | 2213 | H1 | HOH A | 2 | 50.662 | 38.431 | 61.952 | H |
| ATOM | 2214 | H2 | HOH A | 3 | 52.248 | 38.425 | 61.946 | H |
| ATOM | 2215 | O  | HOH A | 1 | 10.785 | 37.787 | 18.107 | O |
| ATOM | 2216 | H1 | HOH A | 2 | 10.802 | 36.867 | 17.772 | H |
| ATOM | 2217 | H2 | HOH A | 3 | 11.588 | 38.243 | 17.778 | H |
| ATOM | 2218 | O  | HOH A | 1 | 10.746 | 37.813 | 40.228 | O |
| ATOM | 2219 | H1 | HOH A | 2 | 10.755 | 36.891 | 39.896 | H |
| ATOM | 2220 | H2 | HOH A | 3 | 11.556 | 38.259 | 39.903 | H |
| ATOM | 2221 | O  | HOH A | 1 | 10.786 | 37.850 | 62.335 | O |
| ATOM | 2222 | H1 | HOH A | 2 | 10.801 | 36.932 | 61.994 | H |
| ATOM | 2223 | H2 | HOH A | 3 | 11.589 | 38.308 | 62.009 | H |
| ATOM | 2224 | O  | HOH A | 1 | 33.376 | 37.913 | 18.080 | O |
| ATOM | 2225 | H1 | HOH A | 2 | 33.391 | 36.990 | 17.749 | H |
| ATOM | 2226 | H2 | HOH A | 3 | 34.182 | 38.365 | 17.754 | H |
| ATOM | 2227 | O  | HOH A | 1 | 33.412 | 37.785 | 40.182 | O |
| ATOM | 2228 | H1 | HOH A | 2 | 33.420 | 36.865 | 39.844 | H |
| ATOM | 2229 | H2 | HOH A | 3 | 34.216 | 38.236 | 39.851 | H |
| ATOM | 2230 | O  | HOH A | 1 | 33.398 | 38.000 | 62.305 | O |
| ATOM | 2231 | H1 | HOH A | 2 | 33.410 | 37.077 | 61.977 | H |
| ATOM | 2232 | H2 | HOH A | 3 | 34.199 | 38.452 | 61.967 | H |
| ATOM | 2233 | O  | HOH A | 1 | 56.002 | 37.837 | 18.008 | O |
| ATOM | 2234 | H1 | HOH A | 2 | 56.015 | 36.914 | 17.679 | H |

|      |      |    |       |   |        |        |        |   |
|------|------|----|-------|---|--------|--------|--------|---|
| ATOM | 2235 | H2 | HOH A | 3 | 56.806 | 38.288 | 17.675 | H |
| ATOM | 2236 | O  | HOH A | 1 | 56.006 | 37.824 | 40.154 | O |
| ATOM | 2237 | H1 | HOH A | 2 | 56.018 | 36.899 | 39.831 | H |
| ATOM | 2238 | H2 | HOH A | 3 | 56.812 | 38.272 | 39.822 | H |
| ATOM | 2239 | O  | HOH A | 1 | 55.995 | 37.952 | 62.275 | O |
| ATOM | 2240 | H1 | HOH A | 2 | 56.000 | 37.028 | 61.947 | H |
| ATOM | 2241 | H2 | HOH A | 3 | 56.804 | 38.395 | 61.943 | H |
| ATOM | 2242 | O  | HOH A | 1 | 15.301 | 37.771 | 18.068 | O |
| ATOM | 2243 | H1 | HOH A | 2 | 15.307 | 36.842 | 17.755 | H |
| ATOM | 2244 | H2 | HOH A | 3 | 15.286 | 37.760 | 19.048 | H |
| ATOM | 2245 | O  | HOH A | 1 | 15.283 | 37.788 | 40.201 | O |
| ATOM | 2246 | H1 | HOH A | 2 | 15.283 | 36.859 | 39.890 | H |
| ATOM | 2247 | H2 | HOH A | 3 | 15.264 | 37.779 | 41.181 | H |
| ATOM | 2248 | O  | HOH A | 1 | 15.281 | 37.833 | 62.285 | O |
| ATOM | 2249 | H1 | HOH A | 2 | 15.279 | 36.905 | 61.971 | H |
| ATOM | 2250 | H2 | HOH A | 3 | 15.268 | 37.822 | 63.265 | H |
| ATOM | 2251 | O  | HOH A | 1 | 37.894 | 37.887 | 18.026 | O |
| ATOM | 2252 | H1 | HOH A | 2 | 37.892 | 36.960 | 17.707 | H |
| ATOM | 2253 | H2 | HOH A | 3 | 37.880 | 37.870 | 19.006 | H |
| ATOM | 2254 | O  | HOH A | 1 | 37.929 | 37.746 | 40.128 | O |
| ATOM | 2255 | H1 | HOH A | 2 | 37.928 | 36.816 | 39.817 | H |
| ATOM | 2256 | H2 | HOH A | 3 | 37.914 | 37.738 | 41.107 | H |
| ATOM | 2257 | O  | HOH A | 1 | 37.905 | 37.988 | 62.253 | O |
| ATOM | 2258 | H1 | HOH A | 2 | 37.907 | 37.061 | 61.938 | H |
| ATOM | 2259 | H2 | HOH A | 3 | 37.884 | 37.975 | 63.233 | H |
| ATOM | 2260 | O  | HOH A | 1 | 60.500 | 37.789 | 17.970 | O |
| ATOM | 2261 | H1 | HOH A | 2 | 60.498 | 36.862 | 17.652 | H |
| ATOM | 2262 | H2 | HOH A | 3 | 60.481 | 37.773 | 18.950 | H |
| ATOM | 2263 | O  | HOH A | 1 | 60.503 | 37.785 | 40.144 | O |
| ATOM | 2264 | H1 | HOH A | 2 | 60.503 | 36.855 | 39.835 | H |
| ATOM | 2265 | H2 | HOH A | 3 | 60.478 | 37.779 | 41.123 | H |
| ATOM | 2266 | O  | HOH A | 1 | 60.513 | 37.884 | 62.257 | O |
| ATOM | 2267 | H1 | HOH A | 2 | 60.505 | 36.959 | 61.935 | H |
| ATOM | 2268 | H2 | HOH A | 3 | 60.491 | 37.864 | 63.237 | H |
| ATOM | 2269 | O  | HOH A | 1 | 19.822 | 37.778 | 18.089 | O |
| ATOM | 2270 | H1 | HOH A | 2 | 19.026 | 38.240 | 17.752 | H |

|      |      |    |       |   |        |        |        |   |
|------|------|----|-------|---|--------|--------|--------|---|
| ATOM | 2271 | H2 | HOH A | 3 | 20.612 | 38.256 | 17.760 | H |
| ATOM | 2272 | O  | HOH A | 1 | 19.804 | 37.742 | 40.197 | O |
| ATOM | 2273 | H1 | HOH A | 2 | 19.009 | 38.210 | 39.866 | H |
| ATOM | 2274 | H2 | HOH A | 3 | 20.594 | 38.219 | 39.869 | H |
| ATOM | 2275 | O  | HOH A | 1 | 19.830 | 37.851 | 62.305 | O |
| ATOM | 2276 | H1 | HOH A | 2 | 19.031 | 38.316 | 61.980 | H |
| ATOM | 2277 | H2 | HOH A | 3 | 20.616 | 38.339 | 61.983 | H |
| ATOM | 2278 | O  | HOH A | 1 | 42.418 | 37.849 | 18.021 | O |
| ATOM | 2279 | H1 | HOH A | 2 | 41.622 | 38.318 | 17.693 | H |
| ATOM | 2280 | H2 | HOH A | 3 | 43.208 | 38.326 | 17.692 | H |
| ATOM | 2281 | O  | HOH A | 1 | 42.462 | 37.712 | 40.130 | O |
| ATOM | 2282 | H1 | HOH A | 2 | 41.665 | 38.177 | 39.798 | H |
| ATOM | 2283 | H2 | HOH A | 3 | 43.251 | 38.190 | 39.800 | H |
| ATOM | 2284 | O  | HOH A | 1 | 42.432 | 37.963 | 62.250 | O |
| ATOM | 2285 | H1 | HOH A | 2 | 41.638 | 38.434 | 61.920 | H |
| ATOM | 2286 | H2 | HOH A | 3 | 43.224 | 38.438 | 61.923 | H |
| ATOM | 2287 | O  | HOH A | 1 | 65.033 | 37.725 | 18.010 | O |
| ATOM | 2288 | H1 | HOH A | 2 | 64.239 | 38.198 | 17.683 | H |
| ATOM | 2289 | H2 | HOH A | 3 | 65.825 | 38.199 | 17.682 | H |
| ATOM | 2290 | O  | HOH A | 1 | 65.014 | 37.748 | 40.169 | O |
| ATOM | 2291 | H1 | HOH A | 2 | 64.218 | 38.214 | 39.836 | H |
| ATOM | 2292 | H2 | HOH A | 3 | 65.803 | 38.230 | 39.846 | H |
| ATOM | 2293 | O  | HOH A | 1 | 65.032 | 37.805 | 62.310 | O |
| ATOM | 2294 | H1 | HOH A | 2 | 64.238 | 38.278 | 61.982 | H |
| ATOM | 2295 | H2 | HOH A | 3 | 65.824 | 38.285 | 61.991 | H |
| ATOM | 2296 | O  | HOH A | 1 | 22.085 | 41.709 | 18.076 | O |
| ATOM | 2297 | H1 | HOH A | 2 | 22.080 | 40.784 | 17.755 | H |
| ATOM | 2298 | H2 | HOH A | 3 | 21.273 | 42.148 | 17.747 | H |
| ATOM | 2299 | O  | HOH A | 1 | 22.071 | 41.670 | 40.183 | O |
| ATOM | 2300 | H1 | HOH A | 2 | 22.061 | 40.743 | 39.864 | H |
| ATOM | 2301 | H2 | HOH A | 3 | 21.262 | 42.113 | 39.852 | H |
| ATOM | 2302 | O  | HOH A | 1 | 22.091 | 41.797 | 62.280 | O |
| ATOM | 2303 | H1 | HOH A | 2 | 22.084 | 40.872 | 61.957 | H |
| ATOM | 2304 | H2 | HOH A | 3 | 21.275 | 42.235 | 61.959 | H |
| ATOM | 2305 | O  | HOH A | 1 | 44.675 | 41.774 | 18.005 | O |
| ATOM | 2306 | H1 | HOH A | 2 | 44.656 | 40.849 | 17.681 | H |

|      |      |    |       |   |        |        |        |   |
|------|------|----|-------|---|--------|--------|--------|---|
| ATOM | 2307 | H2 | HOH A | 3 | 43.862 | 42.222 | 17.689 | H |
| ATOM | 2308 | O  | HOH A | 1 | 44.713 | 41.655 | 40.120 | O |
| ATOM | 2309 | H1 | HOH A | 2 | 44.701 | 40.730 | 39.798 | H |
| ATOM | 2310 | H2 | HOH A | 3 | 43.902 | 42.099 | 39.796 | H |
| ATOM | 2311 | O  | HOH A | 1 | 44.676 | 41.886 | 62.245 | O |
| ATOM | 2312 | H1 | HOH A | 2 | 44.665 | 40.962 | 61.918 | H |
| ATOM | 2313 | H2 | HOH A | 3 | 43.871 | 42.335 | 61.911 | H |
| ATOM | 2314 | O  | HOH A | 1 | 67.287 | 41.647 | 18.033 | O |
| ATOM | 2315 | H1 | HOH A | 2 | 67.272 | 40.723 | 17.706 | H |
| ATOM | 2316 | H2 | HOH A | 3 | 66.477 | 42.095 | 17.712 | H |
| ATOM | 2317 | O  | HOH A | 1 | 67.274 | 41.680 | 40.183 | O |
| ATOM | 2318 | H1 | HOH A | 2 | 67.263 | 40.756 | 39.859 | H |
| ATOM | 2319 | H2 | HOH A | 3 | 66.466 | 42.127 | 39.853 | H |
| ATOM | 2320 | O  | HOH A | 1 | 67.273 | 41.749 | 62.305 | O |
| ATOM | 2321 | H1 | HOH A | 2 | 67.263 | 40.825 | 61.978 | H |
| ATOM | 2322 | H2 | HOH A | 3 | 66.465 | 42.196 | 61.975 | H |
| ATOM | 2323 | O  | HOH A | 1 | 4.002  | 41.640 | 18.049 | O |
| ATOM | 2324 | H1 | HOH A | 2 | 3.197  | 42.096 | 17.726 | H |
| ATOM | 2325 | H2 | HOH A | 3 | 3.978  | 41.640 | 19.029 | H |
| ATOM | 2326 | O  | HOH A | 1 | 3.980  | 41.687 | 40.201 | O |
| ATOM | 2327 | H1 | HOH A | 2 | 3.173  | 42.140 | 39.878 | H |
| ATOM | 2328 | H2 | HOH A | 3 | 3.961  | 41.695 | 41.180 | H |
| ATOM | 2329 | O  | HOH A | 1 | 3.972  | 41.712 | 62.316 | O |
| ATOM | 2330 | H1 | HOH A | 2 | 3.168  | 42.179 | 62.005 | H |
| ATOM | 2331 | H2 | HOH A | 3 | 3.962  | 41.712 | 63.296 | H |
| ATOM | 2332 | O  | HOH A | 1 | 26.593 | 41.758 | 18.079 | O |
| ATOM | 2333 | H1 | HOH A | 2 | 25.784 | 42.210 | 17.760 | H |
| ATOM | 2334 | H2 | HOH A | 3 | 26.576 | 41.763 | 19.059 | H |
| ATOM | 2335 | O  | HOH A | 1 | 26.587 | 41.661 | 40.174 | O |
| ATOM | 2336 | H1 | HOH A | 2 | 25.780 | 42.115 | 39.854 | H |
| ATOM | 2337 | H2 | HOH A | 3 | 26.573 | 41.673 | 41.154 | H |
| ATOM | 2338 | O  | HOH A | 1 | 26.610 | 41.833 | 62.293 | O |
| ATOM | 2339 | H1 | HOH A | 2 | 25.803 | 42.284 | 61.969 | H |
| ATOM | 2340 | H2 | HOH A | 3 | 26.594 | 41.849 | 63.273 | H |
| ATOM | 2341 | O  | HOH A | 1 | 49.202 | 41.748 | 17.982 | O |
| ATOM | 2342 | H1 | HOH A | 2 | 48.393 | 42.208 | 17.675 | H |

|      |      |    |       |   |        |        |        |   |
|------|------|----|-------|---|--------|--------|--------|---|
| ATOM | 2343 | H2 | HOH A | 3 | 49.197 | 41.750 | 18.962 | H |
| ATOM | 2344 | O  | HOH A | 1 | 49.231 | 41.662 | 40.127 | O |
| ATOM | 2345 | H1 | HOH A | 2 | 48.424 | 42.112 | 39.802 | H |
| ATOM | 2346 | H2 | HOH A | 3 | 49.214 | 41.679 | 41.107 | H |
| ATOM | 2347 | O  | HOH A | 1 | 49.184 | 41.871 | 62.259 | O |
| ATOM | 2348 | H1 | HOH A | 2 | 48.383 | 42.333 | 61.935 | H |
| ATOM | 2349 | H2 | HOH A | 3 | 49.160 | 41.872 | 63.238 | H |
| ATOM | 2350 | O  | HOH A | 1 | 8.497  | 41.666 | 18.072 | O |
| ATOM | 2351 | H1 | HOH A | 2 | 7.706  | 42.138 | 17.738 | H |
| ATOM | 2352 | H2 | HOH A | 3 | 9.291  | 42.146 | 17.755 | H |
| ATOM | 2353 | O  | HOH A | 1 | 8.460  | 41.705 | 40.220 | O |
| ATOM | 2354 | H1 | HOH A | 2 | 7.673  | 42.183 | 39.887 | H |
| ATOM | 2355 | H2 | HOH A | 3 | 9.258  | 42.173 | 39.897 | H |
| ATOM | 2356 | O  | HOH A | 1 | 8.491  | 41.740 | 62.317 | O |
| ATOM | 2357 | H1 | HOH A | 2 | 7.697  | 42.205 | 61.981 | H |
| ATOM | 2358 | H2 | HOH A | 3 | 9.282  | 42.220 | 61.995 | H |
| ATOM | 2359 | O  | HOH A | 1 | 31.079 | 41.792 | 18.072 | O |
| ATOM | 2360 | H1 | HOH A | 2 | 30.288 | 42.268 | 17.744 | H |
| ATOM | 2361 | H2 | HOH A | 3 | 31.874 | 42.266 | 17.749 | H |
| ATOM | 2362 | O  | HOH A | 1 | 31.088 | 41.665 | 40.177 | O |
| ATOM | 2363 | H1 | HOH A | 2 | 30.295 | 42.138 | 39.849 | H |
| ATOM | 2364 | H2 | HOH A | 3 | 31.881 | 42.141 | 39.851 | H |
| ATOM | 2365 | O  | HOH A | 1 | 31.103 | 41.880 | 62.287 | O |
| ATOM | 2366 | H1 | HOH A | 2 | 30.309 | 42.350 | 61.957 | H |
| ATOM | 2367 | H2 | HOH A | 3 | 31.894 | 42.358 | 61.963 | H |
| ATOM | 2368 | O  | HOH A | 1 | 53.699 | 41.740 | 18.000 | O |
| ATOM | 2369 | H1 | HOH A | 2 | 52.909 | 42.221 | 17.676 | H |
| ATOM | 2370 | H2 | HOH A | 3 | 54.494 | 42.211 | 17.675 | H |
| ATOM | 2371 | O  | HOH A | 1 | 53.721 | 41.700 | 40.143 | O |
| ATOM | 2372 | H1 | HOH A | 2 | 52.930 | 42.174 | 39.813 | H |
| ATOM | 2373 | H2 | HOH A | 3 | 54.515 | 42.179 | 39.826 | H |
| ATOM | 2374 | O  | HOH A | 1 | 53.688 | 41.859 | 62.265 | O |
| ATOM | 2375 | H1 | HOH A | 2 | 52.899 | 42.337 | 61.934 | H |
| ATOM | 2376 | H2 | HOH A | 3 | 54.485 | 42.329 | 61.939 | H |
| ATOM | 2377 | O  | HOH A | 1 | 13.048 | 41.673 | 18.087 | O |
| ATOM | 2378 | H1 | HOH A | 2 | 12.253 | 42.146 | 17.765 | H |

|      |      |    |       |   |        |        |        |   |
|------|------|----|-------|---|--------|--------|--------|---|
| ATOM | 2379 | H2 | HOH A | 3 | 13.839 | 42.147 | 17.756 | H |
| ATOM | 2380 | O  | HOH A | 1 | 13.001 | 41.683 | 40.221 | O |
| ATOM | 2381 | H1 | HOH A | 2 | 12.214 | 42.170 | 39.897 | H |
| ATOM | 2382 | H2 | HOH A | 3 | 13.800 | 42.149 | 39.897 | H |
| ATOM | 2383 | O  | HOH A | 1 | 13.034 | 41.741 | 62.315 | O |
| ATOM | 2384 | H1 | HOH A | 2 | 12.240 | 42.220 | 61.997 | H |
| ATOM | 2385 | H2 | HOH A | 3 | 13.826 | 42.218 | 61.989 | H |
| ATOM | 2386 | O  | HOH A | 1 | 35.628 | 41.789 | 18.052 | O |
| ATOM | 2387 | H1 | HOH A | 2 | 34.837 | 42.274 | 17.736 | H |
| ATOM | 2388 | H2 | HOH A | 3 | 36.422 | 42.261 | 17.727 | H |
| ATOM | 2389 | O  | HOH A | 1 | 35.650 | 41.661 | 40.165 | O |
| ATOM | 2390 | H1 | HOH A | 2 | 34.851 | 42.133 | 39.851 | H |
| ATOM | 2391 | H2 | HOH A | 3 | 36.437 | 42.139 | 39.830 | H |
| ATOM | 2392 | O  | HOH A | 1 | 35.645 | 41.886 | 62.290 | O |
| ATOM | 2393 | H1 | HOH A | 2 | 34.851 | 42.367 | 61.976 | H |
| ATOM | 2394 | H2 | HOH A | 3 | 36.437 | 42.357 | 61.955 | H |
| ATOM | 2395 | O  | HOH A | 1 | 58.233 | 41.695 | 17.999 | O |
| ATOM | 2396 | H1 | HOH A | 2 | 57.443 | 42.185 | 17.689 | H |
| ATOM | 2397 | H2 | HOH A | 3 | 59.028 | 42.171 | 17.681 | H |
| ATOM | 2398 | O  | HOH A | 1 | 58.256 | 41.702 | 40.143 | O |
| ATOM | 2399 | H1 | HOH A | 2 | 57.463 | 42.179 | 39.821 | H |
| ATOM | 2400 | H2 | HOH A | 3 | 59.048 | 42.176 | 39.814 | H |
| ATOM | 2401 | O  | HOH A | 1 | 58.231 | 41.800 | 62.283 | O |
| ATOM | 2402 | H1 | HOH A | 2 | 57.439 | 42.280 | 61.961 | H |
| ATOM | 2403 | H2 | HOH A | 3 | 59.025 | 42.272 | 61.955 | H |
| ATOM | 2404 | O  | HOH A | 1 | 17.534 | 41.687 | 18.098 | O |
| ATOM | 2405 | H1 | HOH A | 2 | 17.545 | 40.757 | 17.788 | H |
| ATOM | 2406 | H2 | HOH A | 3 | 17.524 | 41.679 | 19.078 | H |
| ATOM | 2407 | O  | HOH A | 1 | 17.533 | 41.678 | 40.217 | O |
| ATOM | 2408 | H1 | HOH A | 2 | 17.542 | 40.748 | 39.906 | H |
| ATOM | 2409 | H2 | HOH A | 3 | 17.518 | 41.669 | 41.196 | H |
| ATOM | 2410 | O  | HOH A | 1 | 17.541 | 41.757 | 62.310 | O |
| ATOM | 2411 | H1 | HOH A | 2 | 17.544 | 40.828 | 61.998 | H |
| ATOM | 2412 | H2 | HOH A | 3 | 17.540 | 41.748 | 63.290 | H |
| ATOM | 2413 | O  | HOH A | 1 | 40.137 | 41.790 | 18.038 | O |
| ATOM | 2414 | H1 | HOH A | 2 | 40.144 | 40.863 | 17.721 | H |

|      |      |    |       |   |        |        |        |   |
|------|------|----|-------|---|--------|--------|--------|---|
| ATOM | 2415 | H2 | HOH A | 3 | 40.134 | 41.774 | 19.018 | H |
| ATOM | 2416 | O  | HOH A | 1 | 40.165 | 41.648 | 40.149 | O |
| ATOM | 2417 | H1 | HOH A | 2 | 40.171 | 40.718 | 39.837 | H |
| ATOM | 2418 | H2 | HOH A | 3 | 40.160 | 41.639 | 41.129 | H |
| ATOM | 2419 | O  | HOH A | 1 | 40.142 | 41.906 | 62.273 | O |
| ATOM | 2420 | H1 | HOH A | 2 | 40.143 | 40.976 | 61.965 | H |
| ATOM | 2421 | H2 | HOH A | 3 | 40.128 | 41.900 | 63.253 | H |
| ATOM | 2422 | O  | HOH A | 1 | 62.742 | 41.676 | 18.009 | O |
| ATOM | 2423 | H1 | HOH A | 2 | 62.749 | 40.745 | 17.701 | H |
| ATOM | 2424 | H2 | HOH A | 3 | 62.737 | 41.670 | 18.989 | H |
| ATOM | 2425 | O  | HOH A | 1 | 62.743 | 41.693 | 40.168 | O |
| ATOM | 2426 | H1 | HOH A | 2 | 62.746 | 40.764 | 39.855 | H |
| ATOM | 2427 | H2 | HOH A | 3 | 62.733 | 41.683 | 41.148 | H |
| ATOM | 2428 | O  | HOH A | 1 | 62.742 | 41.771 | 62.301 | O |
| ATOM | 2429 | H1 | HOH A | 2 | 62.750 | 40.844 | 61.983 | H |
| ATOM | 2430 | H2 | HOH A | 3 | 62.730 | 41.755 | 63.281 | H |
| ATOM | 2431 | O  | HOH A | 1 | 22.061 | 46.934 | 17.159 | O |
| ATOM | 2432 | H1 | HOH A | 2 | 21.263 | 46.471 | 17.490 | H |
| ATOM | 2433 | H2 | HOH A | 3 | 22.041 | 47.853 | 17.499 | H |
| ATOM | 2434 | O  | HOH A | 1 | 22.059 | 46.888 | 39.280 | O |
| ATOM | 2435 | H1 | HOH A | 2 | 21.258 | 46.432 | 39.612 | H |
| ATOM | 2436 | H2 | HOH A | 3 | 22.043 | 47.810 | 39.613 | H |
| ATOM | 2437 | O  | HOH A | 1 | 22.078 | 47.001 | 61.367 | O |
| ATOM | 2438 | H1 | HOH A | 2 | 21.277 | 46.544 | 61.698 | H |
| ATOM | 2439 | H2 | HOH A | 3 | 22.060 | 47.923 | 61.699 | H |
| ATOM | 2440 | O  | HOH A | 1 | 44.681 | 46.990 | 17.087 | O |
| ATOM | 2441 | H1 | HOH A | 2 | 43.880 | 46.540 | 17.426 | H |
| ATOM | 2442 | H2 | HOH A | 3 | 44.670 | 47.914 | 17.415 | H |
| ATOM | 2443 | O  | HOH A | 1 | 44.718 | 46.869 | 39.203 | O |
| ATOM | 2444 | H1 | HOH A | 2 | 43.916 | 46.412 | 39.531 | H |
| ATOM | 2445 | H2 | HOH A | 3 | 44.706 | 47.786 | 39.547 | H |
| ATOM | 2446 | O  | HOH A | 1 | 44.677 | 47.107 | 61.332 | O |
| ATOM | 2447 | H1 | HOH A | 2 | 43.877 | 46.646 | 61.661 | H |
| ATOM | 2448 | H2 | HOH A | 3 | 44.655 | 48.028 | 61.666 | H |
| ATOM | 2449 | O  | HOH A | 1 | 67.297 | 46.871 | 17.106 | O |
| ATOM | 2450 | H1 | HOH A | 2 | 66.493 | 46.413 | 17.429 | H |



|      |      |    |       |   |        |        |        |   |
|------|------|----|-------|---|--------|--------|--------|---|
| ATOM | 2451 | H2 | HOH A | 3 | 67.281 | 47.789 | 17.449 | H |
| ATOM | 2452 | O  | HOH A | 1 | 67.284 | 46.894 | 39.255 | O |
| ATOM | 2453 | H1 | HOH A | 2 | 66.480 | 46.437 | 39.580 | H |
| ATOM | 2454 | H2 | HOH A | 3 | 67.268 | 47.813 | 39.594 | H |
| ATOM | 2455 | O  | HOH A | 1 | 67.280 | 46.960 | 61.381 | O |
| ATOM | 2456 | H1 | HOH A | 2 | 66.477 | 46.501 | 61.704 | H |
| ATOM | 2457 | H2 | HOH A | 3 | 67.260 | 47.879 | 61.720 | H |
| ATOM | 2458 | O  | HOH A | 1 | 3.986  | 46.901 | 17.114 | O |
| ATOM | 2459 | H1 | HOH A | 2 | 4.784  | 46.440 | 17.446 | H |
| ATOM | 2460 | H2 | HOH A | 3 | 3.199  | 46.418 | 17.442 | H |
| ATOM | 2461 | O  | HOH A | 1 | 3.970  | 46.935 | 39.277 | O |
| ATOM | 2462 | H1 | HOH A | 2 | 4.768  | 46.469 | 39.604 | H |
| ATOM | 2463 | H2 | HOH A | 3 | 3.183  | 46.450 | 39.601 | H |
| ATOM | 2464 | O  | HOH A | 1 | 3.979  | 46.976 | 61.388 | O |
| ATOM | 2465 | H1 | HOH A | 2 | 4.775  | 46.510 | 61.718 | H |
| ATOM | 2466 | H2 | HOH A | 3 | 3.189  | 46.497 | 61.714 | H |
| ATOM | 2467 | O  | HOH A | 1 | 26.563 | 47.007 | 17.150 | O |
| ATOM | 2468 | H1 | HOH A | 2 | 27.369 | 46.550 | 17.469 | H |
| ATOM | 2469 | H2 | HOH A | 3 | 25.784 | 46.511 | 17.476 | H |
| ATOM | 2470 | O  | HOH A | 1 | 26.576 | 46.920 | 39.258 | O |
| ATOM | 2471 | H1 | HOH A | 2 | 27.371 | 46.452 | 39.588 | H |
| ATOM | 2472 | H2 | HOH A | 3 | 25.786 | 46.438 | 39.579 | H |
| ATOM | 2473 | O  | HOH A | 1 | 26.584 | 47.077 | 61.356 | O |
| ATOM | 2474 | H1 | HOH A | 2 | 27.381 | 46.610 | 61.684 | H |
| ATOM | 2475 | H2 | HOH A | 3 | 25.795 | 46.596 | 61.683 | H |
| ATOM | 2476 | O  | HOH A | 1 | 49.188 | 47.009 | 17.066 | O |
| ATOM | 2477 | H1 | HOH A | 2 | 49.985 | 46.540 | 17.392 | H |
| ATOM | 2478 | H2 | HOH A | 3 | 48.399 | 46.525 | 17.388 | H |
| ATOM | 2479 | O  | HOH A | 1 | 49.213 | 46.922 | 39.197 | O |
| ATOM | 2480 | H1 | HOH A | 2 | 50.011 | 46.455 | 39.522 | H |
| ATOM | 2481 | H2 | HOH A | 3 | 48.425 | 46.435 | 39.517 | H |
| ATOM | 2482 | O  | HOH A | 1 | 49.181 | 47.118 | 61.324 | O |
| ATOM | 2483 | H1 | HOH A | 2 | 49.975 | 46.650 | 61.655 | H |
| ATOM | 2484 | H2 | HOH A | 3 | 48.390 | 46.639 | 61.649 | H |
| ATOM | 2485 | O  | HOH A | 1 | 8.507  | 46.869 | 17.167 | O |
| ATOM | 2486 | H1 | HOH A | 2 | 8.519  | 47.801 | 17.469 | H |

|      |      |    |       |   |        |        |        |   |
|------|------|----|-------|---|--------|--------|--------|---|
| ATOM | 2487 | H2 | HOH A | 3 | 8.519  | 46.868 | 16.187 | H |
| ATOM | 2488 | O  | HOH A | 1 | 8.487  | 46.916 | 39.322 | O |
| ATOM | 2489 | H1 | HOH A | 2 | 8.491  | 47.846 | 39.629 | H |
| ATOM | 2490 | H2 | HOH A | 3 | 8.496  | 46.920 | 38.342 | H |
| ATOM | 2491 | O  | HOH A | 1 | 8.498  | 46.944 | 61.429 | O |
| ATOM | 2492 | H1 | HOH A | 2 | 8.510  | 47.876 | 61.729 | H |
| ATOM | 2493 | H2 | HOH A | 3 | 8.507  | 46.941 | 60.449 | H |
| ATOM | 2494 | O  | HOH A | 1 | 31.097 | 47.004 | 17.182 | O |
| ATOM | 2495 | H1 | HOH A | 2 | 31.107 | 47.933 | 17.495 | H |
| ATOM | 2496 | H2 | HOH A | 3 | 31.107 | 47.015 | 16.202 | H |
| ATOM | 2497 | O  | HOH A | 1 | 31.097 | 46.877 | 39.277 | O |
| ATOM | 2498 | H1 | HOH A | 2 | 31.104 | 47.807 | 39.586 | H |
| ATOM | 2499 | H2 | HOH A | 3 | 31.106 | 46.883 | 38.297 | H |
| ATOM | 2500 | O  | HOH A | 1 | 31.106 | 47.085 | 61.383 | O |
| ATOM | 2501 | H1 | HOH A | 2 | 31.113 | 48.017 | 61.687 | H |
| ATOM | 2502 | H2 | HOH A | 3 | 31.115 | 47.086 | 60.403 | H |
| ATOM | 2503 | O  | HOH A | 1 | 53.714 | 46.959 | 17.099 | O |
| ATOM | 2504 | H1 | HOH A | 2 | 53.722 | 47.887 | 17.414 | H |
| ATOM | 2505 | H2 | HOH A | 3 | 53.725 | 46.971 | 16.119 | H |
| ATOM | 2506 | O  | HOH A | 1 | 53.736 | 46.904 | 39.242 | O |
| ATOM | 2507 | H1 | HOH A | 2 | 53.745 | 47.836 | 39.547 | H |
| ATOM | 2508 | H2 | HOH A | 3 | 53.748 | 46.906 | 38.262 | H |
| ATOM | 2509 | O  | HOH A | 1 | 53.706 | 47.063 | 61.369 | O |
| ATOM | 2510 | H1 | HOH A | 2 | 53.709 | 47.995 | 61.671 | H |
| ATOM | 2511 | H2 | HOH A | 3 | 53.721 | 47.062 | 60.389 | H |
| ATOM | 2512 | O  | HOH A | 1 | 13.008 | 46.879 | 17.151 | O |
| ATOM | 2513 | H1 | HOH A | 2 | 13.816 | 46.430 | 17.478 | H |
| ATOM | 2514 | H2 | HOH A | 3 | 13.023 | 47.803 | 17.477 | H |
| ATOM | 2515 | O  | HOH A | 1 | 12.995 | 46.886 | 39.296 | O |
| ATOM | 2516 | H1 | HOH A | 2 | 13.804 | 46.443 | 39.626 | H |
| ATOM | 2517 | H2 | HOH A | 3 | 13.000 | 47.810 | 39.622 | H |
| ATOM | 2518 | O  | HOH A | 1 | 13.014 | 46.948 | 61.392 | O |
| ATOM | 2519 | H1 | HOH A | 2 | 13.820 | 46.495 | 61.715 | H |
| ATOM | 2520 | H2 | HOH A | 3 | 13.036 | 47.873 | 61.716 | H |
| ATOM | 2521 | O  | HOH A | 1 | 35.604 | 46.994 | 17.120 | O |
| ATOM | 2522 | H1 | HOH A | 2 | 36.412 | 46.546 | 17.448 | H |

|      |      |    |       |   |        |        |        |   |
|------|------|----|-------|---|--------|--------|--------|---|
| ATOM | 2523 | H2 | HOH A | 3 | 35.614 | 47.916 | 17.451 | H |
| ATOM | 2524 | O  | HOH A | 1 | 35.628 | 46.858 | 39.232 | O |
| ATOM | 2525 | H1 | HOH A | 2 | 36.438 | 46.412 | 39.556 | H |
| ATOM | 2526 | H2 | HOH A | 3 | 35.639 | 47.781 | 39.560 | H |
| ATOM | 2527 | O  | HOH A | 1 | 35.611 | 47.100 | 61.340 | O |
| ATOM | 2528 | H1 | HOH A | 2 | 36.421 | 46.659 | 61.672 | H |
| ATOM | 2529 | H2 | HOH A | 3 | 35.619 | 48.027 | 61.656 | H |
| ATOM | 2530 | O  | HOH A | 1 | 58.220 | 46.909 | 17.071 | O |
| ATOM | 2531 | H1 | HOH A | 2 | 59.028 | 46.464 | 17.401 | H |
| ATOM | 2532 | H2 | HOH A | 3 | 58.228 | 47.833 | 17.397 | H |
| ATOM | 2533 | O  | HOH A | 1 | 58.232 | 46.904 | 39.215 | O |
| ATOM | 2534 | H1 | HOH A | 2 | 59.040 | 46.455 | 39.540 | H |
| ATOM | 2535 | H2 | HOH A | 3 | 58.241 | 47.825 | 39.549 | H |
| ATOM | 2536 | O  | HOH A | 1 | 58.205 | 47.005 | 61.350 | O |
| ATOM | 2537 | H1 | HOH A | 2 | 59.013 | 46.563 | 61.687 | H |
| ATOM | 2538 | H2 | HOH A | 3 | 58.209 | 47.930 | 61.674 | H |
| ATOM | 2539 | O  | HOH A | 1 | 17.540 | 46.893 | 17.155 | O |
| ATOM | 2540 | H1 | HOH A | 2 | 18.334 | 46.429 | 17.494 | H |
| ATOM | 2541 | H2 | HOH A | 3 | 16.748 | 46.422 | 17.489 | H |
| ATOM | 2542 | O  | HOH A | 1 | 17.518 | 46.885 | 39.300 | O |
| ATOM | 2543 | H1 | HOH A | 2 | 18.314 | 46.419 | 39.634 | H |
| ATOM | 2544 | H2 | HOH A | 3 | 16.728 | 46.411 | 39.635 | H |
| ATOM | 2545 | O  | HOH A | 1 | 17.550 | 46.966 | 61.390 | O |
| ATOM | 2546 | H1 | HOH A | 2 | 18.345 | 46.504 | 61.729 | H |
| ATOM | 2547 | H2 | HOH A | 3 | 16.760 | 46.495 | 61.726 | H |
| ATOM | 2548 | O  | HOH A | 1 | 40.149 | 47.004 | 17.119 | O |
| ATOM | 2549 | H1 | HOH A | 2 | 40.944 | 46.536 | 17.449 | H |
| ATOM | 2550 | H2 | HOH A | 3 | 39.359 | 46.530 | 17.453 | H |
| ATOM | 2551 | O  | HOH A | 1 | 40.178 | 46.866 | 39.231 | O |
| ATOM | 2552 | H1 | HOH A | 2 | 40.971 | 46.399 | 39.568 | H |
| ATOM | 2553 | H2 | HOH A | 3 | 39.385 | 46.396 | 39.564 | H |
| ATOM | 2554 | O  | HOH A | 1 | 40.149 | 47.104 | 61.346 | O |
| ATOM | 2555 | H1 | HOH A | 2 | 40.944 | 46.640 | 61.683 | H |
| ATOM | 2556 | H2 | HOH A | 3 | 39.358 | 46.638 | 61.689 | H |
| ATOM | 2557 | O  | HOH A | 1 | 62.767 | 46.885 | 17.104 | O |
| ATOM | 2558 | H1 | HOH A | 2 | 63.558 | 46.412 | 17.437 | H |

|      |      |    |       |   |        |        |        |   |
|------|------|----|-------|---|--------|--------|--------|---|
| ATOM | 2559 | H2 | HOH A | 3 | 61.972 | 46.423 | 17.443 | H |
| ATOM | 2560 | O  | HOH A | 1 | 62.748 | 46.907 | 39.242 | O |
| ATOM | 2561 | H1 | HOH A | 2 | 63.547 | 46.450 | 39.577 | H |
| ATOM | 2562 | H2 | HOH A | 3 | 61.962 | 46.430 | 39.580 | H |
| ATOM | 2563 | O  | HOH A | 1 | 62.737 | 46.989 | 61.384 | O |
| ATOM | 2564 | H1 | HOH A | 2 | 63.529 | 46.521 | 61.720 | H |
| ATOM | 2565 | H2 | HOH A | 3 | 61.944 | 46.522 | 61.720 | H |
| ATOM | 2566 | O  | HOH A | 1 | 1.741  | 27.336 | 17.093 | O |
| ATOM | 2567 | H1 | HOH A | 2 | 2.543  | 26.874 | 17.414 | H |
| ATOM | 2568 | H2 | HOH A | 3 | 0.958  | 26.858 | 17.440 | H |
| ATOM | 2569 | O  | HOH A | 1 | 1.727  | 27.366 | 39.257 | O |
| ATOM | 2570 | H1 | HOH A | 2 | 2.531  | 26.907 | 39.577 | H |
| ATOM | 2571 | H2 | HOH A | 3 | 0.946  | 26.881 | 39.595 | H |
| ATOM | 2572 | O  | HOH A | 1 | 1.741  | 27.412 | 61.366 | O |
| ATOM | 2573 | H1 | HOH A | 2 | 2.541  | 26.946 | 61.688 | H |
| ATOM | 2574 | H2 | HOH A | 3 | 0.955  | 26.939 | 61.712 | H |
| ATOM | 2575 | O  | HOH A | 1 | 24.315 | 27.409 | 17.152 | O |
| ATOM | 2576 | H1 | HOH A | 2 | 25.122 | 26.952 | 17.468 | H |
| ATOM | 2577 | H2 | HOH A | 3 | 23.537 | 26.919 | 17.491 | H |
| ATOM | 2578 | O  | HOH A | 1 | 24.318 | 27.355 | 39.265 | O |
| ATOM | 2579 | H1 | HOH A | 2 | 25.123 | 26.896 | 39.583 | H |
| ATOM | 2580 | H2 | HOH A | 3 | 23.538 | 26.872 | 39.611 | H |
| ATOM | 2581 | O  | HOH A | 1 | 24.335 | 27.490 | 61.363 | O |
| ATOM | 2582 | H1 | HOH A | 2 | 25.141 | 27.035 | 61.684 | H |
| ATOM | 2583 | H2 | HOH A | 3 | 23.556 | 27.010 | 61.714 | H |
| ATOM | 2584 | O  | HOH A | 1 | 46.946 | 27.459 | 17.059 | O |
| ATOM | 2585 | H1 | HOH A | 2 | 47.747 | 26.996 | 17.380 | H |
| ATOM | 2586 | H2 | HOH A | 3 | 46.162 | 26.980 | 17.400 | H |
| ATOM | 2587 | O  | HOH A | 1 | 46.966 | 27.350 | 39.198 | O |
| ATOM | 2588 | H1 | HOH A | 2 | 47.771 | 26.891 | 39.518 | H |
| ATOM | 2589 | H2 | HOH A | 3 | 46.186 | 26.865 | 39.539 | H |
| ATOM | 2590 | O  | HOH A | 1 | 46.928 | 27.569 | 61.321 | O |
| ATOM | 2591 | H1 | HOH A | 2 | 47.731 | 27.107 | 61.641 | H |
| ATOM | 2592 | H2 | HOH A | 3 | 46.145 | 27.095 | 61.672 | H |
| ATOM | 2593 | O  | HOH A | 1 | 6.287  | 27.301 | 17.164 | O |
| ATOM | 2594 | H1 | HOH A | 2 | 6.293  | 28.231 | 17.474 | H |

|      |      |    |       |   |        |        |        |   |
|------|------|----|-------|---|--------|--------|--------|---|
| ATOM | 2595 | H2 | HOH A | 3 | 6.282  | 27.309 | 16.184 | H |
| ATOM | 2596 | O  | HOH A | 1 | 6.240  | 27.333 | 39.316 | O |
| ATOM | 2597 | H1 | HOH A | 2 | 6.251  | 28.262 | 39.626 | H |
| ATOM | 2598 | H2 | HOH A | 3 | 6.233  | 27.340 | 38.336 | H |
| ATOM | 2599 | O  | HOH A | 1 | 6.277  | 27.376 | 61.421 | O |
| ATOM | 2600 | H1 | HOH A | 2 | 6.284  | 28.304 | 61.734 | H |
| ATOM | 2601 | H2 | HOH A | 3 | 6.273  | 27.386 | 60.441 | H |
| ATOM | 2602 | O  | HOH A | 1 | 28.861 | 27.405 | 17.186 | O |
| ATOM | 2603 | H1 | HOH A | 2 | 28.877 | 28.331 | 17.507 | H |
| ATOM | 2604 | H2 | HOH A | 3 | 28.852 | 27.425 | 16.206 | H |
| ATOM | 2605 | O  | HOH A | 1 | 28.870 | 27.314 | 39.298 | O |
| ATOM | 2606 | H1 | HOH A | 2 | 28.883 | 28.243 | 39.609 | H |
| ATOM | 2607 | H2 | HOH A | 3 | 28.864 | 27.323 | 38.318 | H |
| ATOM | 2608 | O  | HOH A | 1 | 28.868 | 27.498 | 61.391 | O |
| ATOM | 2609 | H1 | HOH A | 2 | 28.882 | 28.430 | 61.696 | H |
| ATOM | 2610 | H2 | HOH A | 3 | 28.858 | 27.500 | 60.411 | H |
| ATOM | 2611 | O  | HOH A | 1 | 51.482 | 27.397 | 17.092 | O |
| ATOM | 2612 | H1 | HOH A | 2 | 51.490 | 28.325 | 17.405 | H |
| ATOM | 2613 | H2 | HOH A | 3 | 51.480 | 27.408 | 16.112 | H |
| ATOM | 2614 | O  | HOH A | 1 | 51.501 | 27.322 | 39.243 | O |
| ATOM | 2615 | H1 | HOH A | 2 | 51.514 | 28.249 | 39.560 | H |
| ATOM | 2616 | H2 | HOH A | 3 | 51.499 | 27.338 | 38.263 | H |
| ATOM | 2617 | O  | HOH A | 1 | 51.468 | 27.507 | 61.380 | O |
| ATOM | 2618 | H1 | HOH A | 2 | 51.480 | 28.440 | 61.681 | H |
| ATOM | 2619 | H2 | HOH A | 3 | 51.466 | 27.506 | 60.400 | H |
| ATOM | 2620 | O  | HOH A | 1 | 10.801 | 27.351 | 17.166 | O |
| ATOM | 2621 | H1 | HOH A | 2 | 10.003 | 26.883 | 17.489 | H |
| ATOM | 2622 | H2 | HOH A | 3 | 10.774 | 27.355 | 16.186 | H |
| ATOM | 2623 | O  | HOH A | 1 | 10.761 | 27.380 | 39.305 | O |
| ATOM | 2624 | H1 | HOH A | 2 | 9.964  | 26.910 | 39.629 | H |
| ATOM | 2625 | H2 | HOH A | 3 | 10.732 | 27.387 | 38.326 | H |
| ATOM | 2626 | O  | HOH A | 1 | 10.801 | 27.424 | 61.413 | O |
| ATOM | 2627 | H1 | HOH A | 2 | 10.004 | 26.956 | 61.738 | H |
| ATOM | 2628 | H2 | HOH A | 3 | 10.769 | 27.433 | 60.434 | H |
| ATOM | 2629 | O  | HOH A | 1 | 33.384 | 27.484 | 17.160 | O |
| ATOM | 2630 | H1 | HOH A | 2 | 32.585 | 27.018 | 17.482 | H |

|      |      |    |       |   |        |        |        |   |
|------|------|----|-------|---|--------|--------|--------|---|
| ATOM | 2631 | H2 | HOH A | 3 | 33.354 | 27.496 | 16.180 | H |
| ATOM | 2632 | O  | HOH A | 1 | 33.407 | 27.343 | 39.276 | O |
| ATOM | 2633 | H1 | HOH A | 2 | 32.605 | 26.879 | 39.596 | H |
| ATOM | 2634 | H2 | HOH A | 3 | 33.380 | 27.353 | 38.296 | H |
| ATOM | 2635 | O  | HOH A | 1 | 33.390 | 27.572 | 61.375 | O |
| ATOM | 2636 | H1 | HOH A | 2 | 32.592 | 27.101 | 61.691 | H |
| ATOM | 2637 | H2 | HOH A | 3 | 33.369 | 27.581 | 60.395 | H |
| ATOM | 2638 | O  | HOH A | 1 | 55.992 | 27.402 | 17.095 | O |
| ATOM | 2639 | H1 | HOH A | 2 | 55.191 | 26.937 | 17.416 | H |
| ATOM | 2640 | H2 | HOH A | 3 | 55.965 | 27.410 | 16.115 | H |
| ATOM | 2641 | O  | HOH A | 1 | 56.014 | 27.376 | 39.222 | O |
| ATOM | 2642 | H1 | HOH A | 2 | 55.210 | 26.917 | 39.543 | H |
| ATOM | 2643 | H2 | HOH A | 3 | 55.988 | 27.382 | 38.242 | H |
| ATOM | 2644 | O  | HOH A | 1 | 55.996 | 27.511 | 61.368 | O |
| ATOM | 2645 | H1 | HOH A | 2 | 55.190 | 27.052 | 61.686 | H |
| ATOM | 2646 | H2 | HOH A | 3 | 55.974 | 27.519 | 60.389 | H |
| ATOM | 2647 | O  | HOH A | 1 | 15.299 | 27.360 | 17.136 | O |
| ATOM | 2648 | H1 | HOH A | 2 | 16.093 | 26.887 | 17.459 | H |
| ATOM | 2649 | H2 | HOH A | 3 | 14.508 | 26.885 | 17.466 | H |
| ATOM | 2650 | O  | HOH A | 1 | 15.259 | 27.345 | 39.268 | O |
| ATOM | 2651 | H1 | HOH A | 2 | 16.050 | 26.859 | 39.581 | H |
| ATOM | 2652 | H2 | HOH A | 3 | 14.464 | 26.878 | 39.601 | H |
| ATOM | 2653 | O  | HOH A | 1 | 15.297 | 27.421 | 61.354 | O |
| ATOM | 2654 | H1 | HOH A | 2 | 16.087 | 26.939 | 61.677 | H |
| ATOM | 2655 | H2 | HOH A | 3 | 14.501 | 26.960 | 61.693 | H |
| ATOM | 2656 | O  | HOH A | 1 | 37.899 | 27.467 | 17.098 | O |
| ATOM | 2657 | H1 | HOH A | 2 | 38.695 | 26.991 | 17.415 | H |
| ATOM | 2658 | H2 | HOH A | 3 | 37.109 | 26.991 | 17.430 | H |
| ATOM | 2659 | O  | HOH A | 1 | 37.920 | 27.325 | 39.224 | O |
| ATOM | 2660 | H1 | HOH A | 2 | 38.714 | 26.847 | 39.541 | H |
| ATOM | 2661 | H2 | HOH A | 3 | 37.129 | 26.851 | 39.557 | H |
| ATOM | 2662 | O  | HOH A | 1 | 37.890 | 27.570 | 61.333 | O |
| ATOM | 2663 | H1 | HOH A | 2 | 38.684 | 27.091 | 61.650 | H |
| ATOM | 2664 | H2 | HOH A | 3 | 37.098 | 27.101 | 61.671 | H |
| ATOM | 2665 | O  | HOH A | 1 | 60.505 | 27.362 | 17.044 | O |
| ATOM | 2666 | H1 | HOH A | 2 | 61.295 | 26.878 | 17.362 | H |

|      |      |    |       |   |        |        |        |   |
|------|------|----|-------|---|--------|--------|--------|---|
| ATOM | 2667 | H2 | HOH A | 3 | 59.710 | 26.894 | 17.374 | H |
| ATOM | 2668 | O  | HOH A | 1 | 60.492 | 27.369 | 39.230 | O |
| ATOM | 2669 | H1 | HOH A | 2 | 61.283 | 26.889 | 39.552 | H |
| ATOM | 2670 | H2 | HOH A | 3 | 59.698 | 26.900 | 39.562 | H |
| ATOM | 2671 | O  | HOH A | 1 | 60.490 | 27.450 | 61.337 | O |
| ATOM | 2672 | H1 | HOH A | 2 | 61.284 | 26.975 | 61.660 | H |
| ATOM | 2673 | H2 | HOH A | 3 | 59.699 | 26.981 | 61.673 | H |
| ATOM | 2674 | O  | HOH A | 1 | 19.819 | 27.348 | 17.186 | O |
| ATOM | 2675 | H1 | HOH A | 2 | 19.828 | 28.274 | 17.506 | H |
| ATOM | 2676 | H2 | HOH A | 3 | 19.821 | 27.367 | 16.206 | H |
| ATOM | 2677 | O  | HOH A | 1 | 19.805 | 27.311 | 39.333 | O |
| ATOM | 2678 | H1 | HOH A | 2 | 19.814 | 28.243 | 39.638 | H |
| ATOM | 2679 | H2 | HOH A | 3 | 19.811 | 27.313 | 38.353 | H |
| ATOM | 2680 | O  | HOH A | 1 | 19.832 | 27.414 | 61.407 | O |
| ATOM | 2681 | H1 | HOH A | 2 | 19.844 | 28.344 | 61.716 | H |
| ATOM | 2682 | H2 | HOH A | 3 | 19.850 | 27.421 | 60.427 | H |
| ATOM | 2683 | O  | HOH A | 1 | 42.445 | 27.428 | 17.131 | O |
| ATOM | 2684 | H1 | HOH A | 2 | 42.457 | 28.356 | 17.444 | H |
| ATOM | 2685 | H2 | HOH A | 3 | 42.453 | 27.439 | 16.151 | H |
| ATOM | 2686 | O  | HOH A | 1 | 42.471 | 27.279 | 39.256 | O |
| ATOM | 2687 | H1 | HOH A | 2 | 42.486 | 28.208 | 39.568 | H |
| ATOM | 2688 | H2 | HOH A | 3 | 42.479 | 27.289 | 38.276 | H |
| ATOM | 2689 | O  | HOH A | 1 | 42.432 | 27.533 | 61.362 | O |
| ATOM | 2690 | H1 | HOH A | 2 | 42.436 | 28.465 | 61.665 | H |
| ATOM | 2691 | H2 | HOH A | 3 | 42.441 | 27.533 | 60.382 | H |
| ATOM | 2692 | O  | HOH A | 1 | 65.048 | 27.306 | 17.128 | O |
| ATOM | 2693 | H1 | HOH A | 2 | 65.060 | 28.238 | 17.433 | H |
| ATOM | 2694 | H2 | HOH A | 3 | 65.064 | 27.308 | 16.148 | H |
| ATOM | 2695 | O  | HOH A | 1 | 65.025 | 27.326 | 39.286 | O |
| ATOM | 2696 | H1 | HOH A | 2 | 65.046 | 28.255 | 39.596 | H |
| ATOM | 2697 | H2 | HOH A | 3 | 65.031 | 27.334 | 38.306 | H |
| ATOM | 2698 | O  | HOH A | 1 | 65.031 | 27.406 | 61.411 | O |
| ATOM | 2699 | H1 | HOH A | 2 | 65.043 | 28.336 | 61.720 | H |
| ATOM | 2700 | H2 | HOH A | 3 | 65.038 | 27.413 | 60.431 | H |
| ATOM | 2701 | O  | HOH A | 1 | 22.061 | 31.283 | 17.149 | O |
| ATOM | 2702 | H1 | HOH A | 2 | 22.878 | 30.849 | 17.471 | H |

|      |      |    |       |   |        |        |        |   |
|------|------|----|-------|---|--------|--------|--------|---|
| ATOM | 2703 | H2 | HOH A | 3 | 22.059 | 32.206 | 17.477 | H |
| ATOM | 2704 | O  | HOH A | 1 | 22.048 | 31.224 | 39.254 | O |
| ATOM | 2705 | H1 | HOH A | 2 | 22.860 | 30.785 | 39.581 | H |
| ATOM | 2706 | H2 | HOH A | 3 | 22.049 | 32.147 | 39.583 | H |
| ATOM | 2707 | O  | HOH A | 1 | 22.074 | 31.355 | 61.358 | O |
| ATOM | 2708 | H1 | HOH A | 2 | 22.892 | 30.928 | 61.688 | H |
| ATOM | 2709 | H2 | HOH A | 3 | 22.068 | 32.283 | 61.675 | H |
| ATOM | 2710 | O  | HOH A | 1 | 44.679 | 31.349 | 17.053 | O |
| ATOM | 2711 | H1 | HOH A | 2 | 45.496 | 30.914 | 17.374 | H |
| ATOM | 2712 | H2 | HOH A | 3 | 44.677 | 32.272 | 17.382 | H |
| ATOM | 2713 | O  | HOH A | 1 | 44.705 | 31.224 | 39.179 | O |
| ATOM | 2714 | H1 | HOH A | 2 | 45.518 | 30.788 | 39.511 | H |
| ATOM | 2715 | H2 | HOH A | 3 | 44.704 | 32.149 | 39.503 | H |
| ATOM | 2716 | O  | HOH A | 1 | 44.659 | 31.450 | 61.295 | O |
| ATOM | 2717 | H1 | HOH A | 2 | 45.476 | 31.021 | 61.626 | H |
| ATOM | 2718 | H2 | HOH A | 3 | 44.655 | 32.378 | 61.609 | H |
| ATOM | 2719 | O  | HOH A | 1 | 67.272 | 31.214 | 17.079 | O |
| ATOM | 2720 | H1 | HOH A | 2 | 68.085 | 30.778 | 17.410 | H |
| ATOM | 2721 | H2 | HOH A | 3 | 67.274 | 32.141 | 17.398 | H |
| ATOM | 2722 | O  | HOH A | 1 | 67.259 | 31.252 | 39.224 | O |
| ATOM | 2723 | H1 | HOH A | 2 | 68.077 | 30.825 | 39.553 | H |
| ATOM | 2724 | H2 | HOH A | 3 | 67.252 | 32.179 | 39.542 | H |
| ATOM | 2725 | O  | HOH A | 1 | 67.265 | 31.302 | 61.346 | O |
| ATOM | 2726 | H1 | HOH A | 2 | 68.076 | 30.863 | 61.675 | H |
| ATOM | 2727 | H2 | HOH A | 3 | 67.267 | 32.226 | 61.672 | H |
| ATOM | 2728 | O  | HOH A | 1 | 4.046  | 31.191 | 17.125 | O |
| ATOM | 2729 | H1 | HOH A | 2 | 3.230  | 30.758 | 17.452 | H |
| ATOM | 2730 | H2 | HOH A | 3 | 4.049  | 32.115 | 17.450 | H |
| ATOM | 2731 | O  | HOH A | 1 | 4.020  | 31.239 | 39.269 | O |
| ATOM | 2732 | H1 | HOH A | 2 | 3.211  | 30.795 | 39.599 | H |
| ATOM | 2733 | H2 | HOH A | 3 | 4.013  | 32.163 | 39.595 | H |
| ATOM | 2734 | O  | HOH A | 1 | 4.035  | 31.278 | 61.388 | O |
| ATOM | 2735 | H1 | HOH A | 2 | 3.220  | 30.840 | 61.710 | H |
| ATOM | 2736 | H2 | HOH A | 3 | 4.033  | 32.202 | 61.716 | H |
| ATOM | 2737 | O  | HOH A | 1 | 26.635 | 31.299 | 17.165 | O |
| ATOM | 2738 | H1 | HOH A | 2 | 25.824 | 30.852 | 17.487 | H |



|      |      |    |       |   |        |        |        |   |
|------|------|----|-------|---|--------|--------|--------|---|
| ATOM | 2739 | H2 | HOH A | 3 | 26.626 | 32.220 | 17.501 | H |
| ATOM | 2740 | O  | HOH A | 1 | 26.629 | 31.211 | 39.290 | O |
| ATOM | 2741 | H1 | HOH A | 2 | 25.813 | 30.774 | 39.613 | H |
| ATOM | 2742 | H2 | HOH A | 3 | 26.626 | 32.136 | 39.615 | H |
| ATOM | 2743 | O  | HOH A | 1 | 26.638 | 31.384 | 61.378 | O |
| ATOM | 2744 | H1 | HOH A | 2 | 25.833 | 30.936 | 61.712 | H |
| ATOM | 2745 | H2 | HOH A | 3 | 26.628 | 32.308 | 61.706 | H |
| ATOM | 2746 | O  | HOH A | 1 | 49.253 | 31.317 | 17.056 | O |
| ATOM | 2747 | H1 | HOH A | 2 | 48.438 | 30.878 | 17.378 | H |
| ATOM | 2748 | H2 | HOH A | 3 | 49.246 | 32.243 | 17.379 | H |
| ATOM | 2749 | O  | HOH A | 1 | 49.270 | 31.217 | 39.211 | O |
| ATOM | 2750 | H1 | HOH A | 2 | 48.461 | 30.774 | 39.541 | H |
| ATOM | 2751 | H2 | HOH A | 3 | 49.267 | 32.140 | 39.542 | H |
| ATOM | 2752 | O  | HOH A | 1 | 49.242 | 31.426 | 61.329 | O |
| ATOM | 2753 | H1 | HOH A | 2 | 48.432 | 30.981 | 61.654 | H |
| ATOM | 2754 | H2 | HOH A | 3 | 49.229 | 32.352 | 61.650 | H |
| ATOM | 2755 | O  | HOH A | 1 | 8.537  | 31.268 | 17.179 | O |
| ATOM | 2756 | H1 | HOH A | 2 | 7.725  | 30.826 | 17.503 | H |
| ATOM | 2757 | H2 | HOH A | 3 | 8.518  | 32.199 | 17.485 | H |
| ATOM | 2758 | O  | HOH A | 1 | 8.501  | 31.300 | 39.323 | O |
| ATOM | 2759 | H1 | HOH A | 2 | 7.693  | 30.846 | 39.642 | H |
| ATOM | 2760 | H2 | HOH A | 3 | 8.474  | 32.226 | 39.642 | H |
| ATOM | 2761 | O  | HOH A | 1 | 8.516  | 31.349 | 61.427 | O |
| ATOM | 2762 | H1 | HOH A | 2 | 7.704  | 30.903 | 61.748 | H |
| ATOM | 2763 | H2 | HOH A | 3 | 8.494  | 32.278 | 61.737 | H |
| ATOM | 2764 | O  | HOH A | 1 | 31.111 | 31.390 | 17.172 | O |
| ATOM | 2765 | H1 | HOH A | 2 | 30.308 | 30.939 | 17.507 | H |
| ATOM | 2766 | H2 | HOH A | 3 | 31.087 | 32.319 | 17.482 | H |
| ATOM | 2767 | O  | HOH A | 1 | 31.132 | 31.268 | 39.306 | O |
| ATOM | 2768 | H1 | HOH A | 2 | 30.325 | 30.819 | 39.634 | H |
| ATOM | 2769 | H2 | HOH A | 3 | 31.112 | 32.195 | 39.621 | H |
| ATOM | 2770 | O  | HOH A | 1 | 31.131 | 31.483 | 61.388 | O |
| ATOM | 2771 | H1 | HOH A | 2 | 30.329 | 31.030 | 61.721 | H |
| ATOM | 2772 | H2 | HOH A | 3 | 31.105 | 32.413 | 61.698 | H |
| ATOM | 2773 | O  | HOH A | 1 | 53.733 | 31.349 | 17.112 | O |
| ATOM | 2774 | H1 | HOH A | 2 | 52.919 | 30.907 | 17.432 | H |

|      |      |    |       |   |        |        |        |   |
|------|------|----|-------|---|--------|--------|--------|---|
| ATOM | 2775 | H2 | HOH A | 3 | 53.718 | 32.276 | 17.430 | H |
| ATOM | 2776 | O  | HOH A | 1 | 53.760 | 31.298 | 39.258 | O |
| ATOM | 2777 | H1 | HOH A | 2 | 52.954 | 30.845 | 39.582 | H |
| ATOM | 2778 | H2 | HOH A | 3 | 53.736 | 32.225 | 39.576 | H |
| ATOM | 2779 | O  | HOH A | 1 | 53.726 | 31.454 | 61.366 | O |
| ATOM | 2780 | H1 | HOH A | 2 | 52.919 | 31.005 | 61.693 | H |
| ATOM | 2781 | H2 | HOH A | 3 | 53.699 | 32.386 | 61.670 | H |
| ATOM | 2782 | O  | HOH A | 1 | 13.015 | 31.264 | 17.154 | O |
| ATOM | 2783 | H1 | HOH A | 2 | 13.808 | 30.791 | 17.481 | H |
| ATOM | 2784 | H2 | HOH A | 3 | 12.223 | 30.786 | 17.477 | H |
| ATOM | 2785 | O  | HOH A | 1 | 12.994 | 31.282 | 39.294 | O |
| ATOM | 2786 | H1 | HOH A | 2 | 13.785 | 30.803 | 39.618 | H |
| ATOM | 2787 | H2 | HOH A | 3 | 12.199 | 30.807 | 39.616 | H |
| ATOM | 2788 | O  | HOH A | 1 | 13.019 | 31.326 | 61.400 | O |
| ATOM | 2789 | H1 | HOH A | 2 | 13.812 | 30.852 | 61.726 | H |
| ATOM | 2790 | H2 | HOH A | 3 | 12.226 | 30.851 | 61.727 | H |
| ATOM | 2791 | O  | HOH A | 1 | 35.613 | 31.393 | 17.143 | O |
| ATOM | 2792 | H1 | HOH A | 2 | 36.407 | 30.917 | 17.466 | H |
| ATOM | 2793 | H2 | HOH A | 3 | 34.821 | 30.913 | 17.464 | H |
| ATOM | 2794 | O  | HOH A | 1 | 35.642 | 31.252 | 39.245 | O |
| ATOM | 2795 | H1 | HOH A | 2 | 36.433 | 30.772 | 39.569 | H |
| ATOM | 2796 | H2 | HOH A | 3 | 34.847 | 30.771 | 39.557 | H |
| ATOM | 2797 | O  | HOH A | 1 | 35.616 | 31.484 | 61.335 | O |
| ATOM | 2798 | H1 | HOH A | 2 | 36.409 | 31.006 | 61.656 | H |
| ATOM | 2799 | H2 | HOH A | 3 | 34.824 | 31.006 | 61.658 | H |
| ATOM | 2800 | O  | HOH A | 1 | 58.224 | 31.299 | 17.074 | O |
| ATOM | 2801 | H1 | HOH A | 2 | 59.009 | 30.811 | 17.400 | H |
| ATOM | 2802 | H2 | HOH A | 3 | 57.423 | 30.828 | 17.386 | H |
| ATOM | 2803 | O  | HOH A | 1 | 58.225 | 31.291 | 39.228 | O |
| ATOM | 2804 | H1 | HOH A | 2 | 59.020 | 30.821 | 39.556 | H |
| ATOM | 2805 | H2 | HOH A | 3 | 57.434 | 30.807 | 39.546 | H |
| ATOM | 2806 | O  | HOH A | 1 | 58.214 | 31.401 | 61.361 | O |
| ATOM | 2807 | H1 | HOH A | 2 | 58.999 | 30.916 | 61.691 | H |
| ATOM | 2808 | H2 | HOH A | 3 | 57.413 | 30.931 | 61.674 | H |
| ATOM | 2809 | O  | HOH A | 1 | 17.568 | 31.274 | 17.176 | O |
| ATOM | 2810 | H1 | HOH A | 2 | 18.356 | 30.794 | 17.506 | H |

|      |      |    |       |   |        |        |        |   |
|------|------|----|-------|---|--------|--------|--------|---|
| ATOM | 2811 | H2 | HOH A | 3 | 16.770 | 30.805 | 17.499 | H |
| ATOM | 2812 | O  | HOH A | 1 | 17.544 | 31.258 | 39.309 | O |
| ATOM | 2813 | H1 | HOH A | 2 | 18.335 | 30.779 | 39.635 | H |
| ATOM | 2814 | H2 | HOH A | 3 | 16.749 | 30.785 | 39.632 | H |
| ATOM | 2815 | O  | HOH A | 1 | 17.578 | 31.337 | 61.399 | O |
| ATOM | 2816 | H1 | HOH A | 2 | 18.370 | 30.861 | 61.725 | H |
| ATOM | 2817 | H2 | HOH A | 3 | 16.784 | 30.859 | 61.720 | H |
| ATOM | 2818 | O  | HOH A | 1 | 40.169 | 31.373 | 17.127 | O |
| ATOM | 2819 | H1 | HOH A | 2 | 40.959 | 30.886 | 17.443 | H |
| ATOM | 2820 | H2 | HOH A | 3 | 39.373 | 30.901 | 17.451 | H |
| ATOM | 2821 | O  | HOH A | 1 | 40.205 | 31.222 | 39.248 | O |
| ATOM | 2822 | H1 | HOH A | 2 | 40.997 | 30.743 | 39.570 | H |
| ATOM | 2823 | H2 | HOH A | 3 | 39.411 | 30.747 | 39.572 | H |
| ATOM | 2824 | O  | HOH A | 1 | 40.174 | 31.479 | 61.352 | O |
| ATOM | 2825 | H1 | HOH A | 2 | 40.964 | 31.001 | 61.681 | H |
| ATOM | 2826 | H2 | HOH A | 3 | 39.379 | 31.005 | 61.674 | H |
| ATOM | 2827 | O  | HOH A | 1 | 62.771 | 31.250 | 17.094 | O |
| ATOM | 2828 | H1 | HOH A | 2 | 63.557 | 30.766 | 17.421 | H |
| ATOM | 2829 | H2 | HOH A | 3 | 61.972 | 30.783 | 17.416 | H |
| ATOM | 2830 | O  | HOH A | 1 | 62.768 | 31.268 | 39.256 | O |
| ATOM | 2831 | H1 | HOH A | 2 | 63.553 | 30.786 | 39.592 | H |
| ATOM | 2832 | H2 | HOH A | 3 | 61.967 | 30.799 | 39.570 | H |
| ATOM | 2833 | O  | HOH A | 1 | 62.759 | 31.345 | 61.383 | O |
| ATOM | 2834 | H1 | HOH A | 2 | 63.546 | 30.862 | 61.711 | H |
| ATOM | 2835 | H2 | HOH A | 3 | 61.961 | 30.876 | 61.705 | H |
| ATOM | 2836 | O  | HOH A | 1 | 1.759  | 35.113 | 17.107 | O |
| ATOM | 2837 | H1 | HOH A | 2 | 2.571  | 34.657 | 17.413 | H |
| ATOM | 2838 | H2 | HOH A | 3 | 1.768  | 35.121 | 16.127 | H |
| ATOM | 2839 | O  | HOH A | 1 | 1.714  | 35.152 | 39.272 | O |
| ATOM | 2840 | H1 | HOH A | 2 | 2.515  | 34.685 | 39.589 | H |
| ATOM | 2841 | H2 | HOH A | 3 | 1.735  | 35.158 | 38.292 | H |
| ATOM | 2842 | O  | HOH A | 1 | 1.737  | 35.198 | 61.386 | O |
| ATOM | 2843 | H1 | HOH A | 2 | 2.550  | 34.740 | 61.686 | H |
| ATOM | 2844 | H2 | HOH A | 3 | 1.743  | 35.213 | 60.406 | H |
| ATOM | 2845 | O  | HOH A | 1 | 24.334 | 35.203 | 17.176 | O |
| ATOM | 2846 | H1 | HOH A | 2 | 25.149 | 34.748 | 17.475 | H |

|      |      |    |       |   |        |        |        |   |
|------|------|----|-------|---|--------|--------|--------|---|
| ATOM | 2847 | H2 | HOH A | 3 | 24.338 | 35.216 | 16.196 | H |
| ATOM | 2848 | O  | HOH A | 1 | 24.330 | 35.122 | 39.274 | O |
| ATOM | 2849 | H1 | HOH A | 2 | 25.143 | 34.669 | 39.578 | H |
| ATOM | 2850 | H2 | HOH A | 3 | 24.337 | 35.132 | 38.294 | H |
| ATOM | 2851 | O  | HOH A | 1 | 24.339 | 35.286 | 61.379 | O |
| ATOM | 2852 | H1 | HOH A | 2 | 25.149 | 34.835 | 61.696 | H |
| ATOM | 2853 | H2 | HOH A | 3 | 24.353 | 35.281 | 60.399 | H |
| ATOM | 2854 | O  | HOH A | 1 | 46.934 | 35.247 | 17.079 | O |
| ATOM | 2855 | H1 | HOH A | 2 | 47.744 | 34.783 | 17.377 | H |
| ATOM | 2856 | H2 | HOH A | 3 | 46.938 | 35.263 | 16.099 | H |
| ATOM | 2857 | O  | HOH A | 1 | 46.977 | 35.129 | 39.199 | O |
| ATOM | 2858 | H1 | HOH A | 2 | 47.789 | 34.673 | 39.506 | H |
| ATOM | 2859 | H2 | HOH A | 3 | 46.986 | 35.136 | 38.219 | H |
| ATOM | 2860 | O  | HOH A | 1 | 46.931 | 35.347 | 61.331 | O |
| ATOM | 2861 | H1 | HOH A | 2 | 47.739 | 34.887 | 61.641 | H |
| ATOM | 2862 | H2 | HOH A | 3 | 46.942 | 35.350 | 60.351 | H |
| ATOM | 2863 | O  | HOH A | 1 | 6.283  | 35.133 | 17.091 | O |
| ATOM | 2864 | H1 | HOH A | 2 | 6.270  | 36.059 | 17.413 | H |
| ATOM | 2865 | H2 | HOH A | 3 | 6.276  | 35.153 | 16.111 | H |
| ATOM | 2866 | O  | HOH A | 1 | 6.239  | 35.183 | 39.242 | O |
| ATOM | 2867 | H1 | HOH A | 2 | 6.230  | 36.107 | 39.567 | H |
| ATOM | 2868 | H2 | HOH A | 3 | 6.228  | 35.206 | 38.262 | H |
| ATOM | 2869 | O  | HOH A | 1 | 6.256  | 35.221 | 61.349 | O |
| ATOM | 2870 | H1 | HOH A | 2 | 6.254  | 36.146 | 61.672 | H |
| ATOM | 2871 | H2 | HOH A | 3 | 6.236  | 35.241 | 60.370 | H |
| ATOM | 2872 | O  | HOH A | 1 | 28.850 | 35.250 | 17.114 | O |
| ATOM | 2873 | H1 | HOH A | 2 | 28.838 | 36.173 | 17.443 | H |
| ATOM | 2874 | H2 | HOH A | 3 | 28.829 | 35.278 | 16.134 | H |
| ATOM | 2875 | O  | HOH A | 1 | 28.870 | 35.138 | 39.228 | O |
| ATOM | 2876 | H1 | HOH A | 2 | 28.856 | 36.062 | 39.554 | H |
| ATOM | 2877 | H2 | HOH A | 3 | 28.864 | 35.163 | 38.248 | H |
| ATOM | 2878 | O  | HOH A | 1 | 28.860 | 35.340 | 61.331 | O |
| ATOM | 2879 | H1 | HOH A | 2 | 28.851 | 36.268 | 61.646 | H |
| ATOM | 2880 | H2 | HOH A | 3 | 28.842 | 35.352 | 60.352 | H |
| ATOM | 2881 | O  | HOH A | 1 | 51.471 | 35.229 | 17.020 | O |
| ATOM | 2882 | H1 | HOH A | 2 | 51.457 | 36.150 | 17.353 | H |

|      |      |    |       |   |        |        |        |   |
|------|------|----|-------|---|--------|--------|--------|---|
| ATOM | 2883 | H2 | HOH A | 3 | 51.459 | 35.261 | 16.041 | H |
| ATOM | 2884 | O  | HOH A | 1 | 51.500 | 35.160 | 39.165 | O |
| ATOM | 2885 | H1 | HOH A | 2 | 51.480 | 36.083 | 39.492 | H |
| ATOM | 2886 | H2 | HOH A | 3 | 51.487 | 35.185 | 38.186 | H |
| ATOM | 2887 | O  | HOH A | 1 | 51.457 | 35.350 | 61.290 | O |
| ATOM | 2888 | H1 | HOH A | 2 | 51.447 | 36.275 | 61.613 | H |
| ATOM | 2889 | H2 | HOH A | 3 | 51.444 | 35.371 | 60.310 | H |
| ATOM | 2890 | O  | HOH A | 1 | 10.800 | 35.197 | 17.154 | O |
| ATOM | 2891 | H1 | HOH A | 2 | 11.586 | 34.718 | 17.491 | H |
| ATOM | 2892 | H2 | HOH A | 3 | 10.000 | 34.734 | 17.480 | H |
| ATOM | 2893 | O  | HOH A | 1 | 10.751 | 35.216 | 39.283 | O |
| ATOM | 2894 | H1 | HOH A | 2 | 11.542 | 34.740 | 39.611 | H |
| ATOM | 2895 | H2 | HOH A | 3 | 9.957  | 34.756 | 39.625 | H |
| ATOM | 2896 | O  | HOH A | 1 | 10.788 | 35.270 | 61.385 | O |
| ATOM | 2897 | H1 | HOH A | 2 | 11.577 | 34.793 | 61.717 | H |
| ATOM | 2898 | H2 | HOH A | 3 | 9.991  | 34.812 | 61.725 | H |
| ATOM | 2899 | O  | HOH A | 1 | 33.372 | 35.323 | 17.133 | O |
| ATOM | 2900 | H1 | HOH A | 2 | 34.163 | 34.845 | 17.459 | H |
| ATOM | 2901 | H2 | HOH A | 3 | 32.578 | 34.860 | 17.471 | H |
| ATOM | 2902 | O  | HOH A | 1 | 33.400 | 35.196 | 39.238 | O |
| ATOM | 2903 | H1 | HOH A | 2 | 34.191 | 34.719 | 39.566 | H |
| ATOM | 2904 | H2 | HOH A | 3 | 32.606 | 34.737 | 39.583 | H |
| ATOM | 2905 | O  | HOH A | 1 | 33.381 | 35.418 | 61.365 | O |
| ATOM | 2906 | H1 | HOH A | 2 | 34.171 | 34.940 | 61.694 | H |
| ATOM | 2907 | H2 | HOH A | 3 | 32.585 | 34.961 | 61.709 | H |
| ATOM | 2908 | O  | HOH A | 1 | 56.002 | 35.254 | 17.069 | O |
| ATOM | 2909 | H1 | HOH A | 2 | 56.782 | 34.764 | 17.402 | H |
| ATOM | 2910 | H2 | HOH A | 3 | 55.197 | 34.801 | 17.398 | H |
| ATOM | 2911 | O  | HOH A | 1 | 56.007 | 35.233 | 39.214 | O |
| ATOM | 2912 | H1 | HOH A | 2 | 56.796 | 34.755 | 39.545 | H |
| ATOM | 2913 | H2 | HOH A | 3 | 55.211 | 34.775 | 39.554 | H |
| ATOM | 2914 | O  | HOH A | 1 | 55.982 | 35.357 | 61.343 | O |
| ATOM | 2915 | H1 | HOH A | 2 | 56.766 | 34.874 | 61.678 | H |
| ATOM | 2916 | H2 | HOH A | 3 | 55.180 | 34.903 | 61.676 | H |
| ATOM | 2917 | O  | HOH A | 1 | 15.277 | 35.157 | 17.167 | O |
| ATOM | 2918 | H1 | HOH A | 2 | 16.082 | 34.700 | 17.489 | H |

|      |      |    |       |   |        |        |        |   |
|------|------|----|-------|---|--------|--------|--------|---|
| ATOM | 2919 | H2 | HOH A | 3 | 15.289 | 35.136 | 16.187 | H |
| ATOM | 2920 | O  | HOH A | 1 | 15.246 | 35.171 | 39.296 | O |
| ATOM | 2921 | H1 | HOH A | 2 | 16.045 | 34.700 | 39.613 | H |
| ATOM | 2922 | H2 | HOH A | 3 | 15.251 | 35.152 | 38.317 | H |
| ATOM | 2923 | O  | HOH A | 1 | 15.274 | 35.226 | 61.378 | O |
| ATOM | 2924 | H1 | HOH A | 2 | 16.083 | 34.772 | 61.695 | H |
| ATOM | 2925 | H2 | HOH A | 3 | 15.281 | 35.209 | 60.399 | H |
| ATOM | 2926 | O  | HOH A | 1 | 37.868 | 35.278 | 17.106 | O |
| ATOM | 2927 | H1 | HOH A | 2 | 38.670 | 34.810 | 17.420 | H |
| ATOM | 2928 | H2 | HOH A | 3 | 37.878 | 35.271 | 16.126 | H |
| ATOM | 2929 | O  | HOH A | 1 | 37.905 | 35.143 | 39.227 | O |
| ATOM | 2930 | H1 | HOH A | 2 | 38.706 | 34.677 | 39.545 | H |
| ATOM | 2931 | H2 | HOH A | 3 | 37.913 | 35.125 | 38.247 | H |
| ATOM | 2932 | O  | HOH A | 1 | 37.876 | 35.376 | 61.340 | O |
| ATOM | 2933 | H1 | HOH A | 2 | 38.674 | 34.911 | 61.666 | H |
| ATOM | 2934 | H2 | HOH A | 3 | 37.890 | 35.351 | 60.360 | H |
| ATOM | 2935 | O  | HOH A | 1 | 60.490 | 35.164 | 17.077 | O |
| ATOM | 2936 | H1 | HOH A | 2 | 61.292 | 34.702 | 17.401 | H |
| ATOM | 2937 | H2 | HOH A | 3 | 60.501 | 35.138 | 16.098 | H |
| ATOM | 2938 | O  | HOH A | 1 | 60.479 | 35.170 | 39.235 | O |
| ATOM | 2939 | H1 | HOH A | 2 | 61.282 | 34.711 | 39.557 | H |
| ATOM | 2940 | H2 | HOH A | 3 | 60.484 | 35.139 | 38.256 | H |
| ATOM | 2941 | O  | HOH A | 1 | 60.475 | 35.272 | 61.351 | O |
| ATOM | 2942 | H1 | HOH A | 2 | 61.270 | 34.797 | 61.673 | H |
| ATOM | 2943 | H2 | HOH A | 3 | 60.486 | 35.250 | 60.371 | H |
| ATOM | 2944 | O  | HOH A | 1 | 19.811 | 35.182 | 17.169 | O |
| ATOM | 2945 | H1 | HOH A | 2 | 19.009 | 34.733 | 17.510 | H |
| ATOM | 2946 | H2 | HOH A | 3 | 19.807 | 36.103 | 17.503 | H |
| ATOM | 2947 | O  | HOH A | 1 | 19.790 | 35.147 | 39.260 | O |
| ATOM | 2948 | H1 | HOH A | 2 | 18.991 | 34.696 | 39.603 | H |
| ATOM | 2949 | H2 | HOH A | 3 | 19.787 | 36.067 | 39.598 | H |
| ATOM | 2950 | O  | HOH A | 1 | 19.815 | 35.262 | 61.354 | O |
| ATOM | 2951 | H1 | HOH A | 2 | 19.012 | 34.816 | 61.696 | H |
| ATOM | 2952 | H2 | HOH A | 3 | 19.813 | 36.184 | 61.685 | H |
| ATOM | 2953 | O  | HOH A | 1 | 42.413 | 35.269 | 17.063 | O |
| ATOM | 2954 | H1 | HOH A | 2 | 41.611 | 34.821 | 17.405 | H |

|      |      |    |       |   |        |        |        |   |
|------|------|----|-------|---|--------|--------|--------|---|
| ATOM | 2955 | H2 | HOH A | 3 | 42.413 | 36.189 | 17.399 | H |
| ATOM | 2956 | O  | HOH A | 1 | 42.445 | 35.127 | 39.188 | O |
| ATOM | 2957 | H1 | HOH A | 2 | 41.640 | 34.679 | 39.522 | H |
| ATOM | 2958 | H2 | HOH A | 3 | 42.442 | 36.047 | 39.526 | H |
| ATOM | 2959 | O  | HOH A | 1 | 42.397 | 35.380 | 61.301 | O |
| ATOM | 2960 | H1 | HOH A | 2 | 41.592 | 34.941 | 61.648 | H |
| ATOM | 2961 | H2 | HOH A | 3 | 42.410 | 36.300 | 61.638 | H |
| ATOM | 2962 | O  | HOH A | 1 | 65.019 | 35.137 | 17.062 | O |
| ATOM | 2963 | H1 | HOH A | 2 | 64.217 | 34.690 | 17.403 | H |
| ATOM | 2964 | H2 | HOH A | 3 | 65.019 | 36.058 | 17.398 | H |
| ATOM | 2965 | O  | HOH A | 1 | 64.997 | 35.162 | 39.222 | O |
| ATOM | 2966 | H1 | HOH A | 2 | 64.194 | 34.718 | 39.567 | H |
| ATOM | 2967 | H2 | HOH A | 3 | 65.007 | 36.080 | 39.565 | H |
| ATOM | 2968 | O  | HOH A | 1 | 65.002 | 35.224 | 61.352 | O |
| ATOM | 2969 | H1 | HOH A | 2 | 64.192 | 34.786 | 61.686 | H |
| ATOM | 2970 | H2 | HOH A | 3 | 65.012 | 36.143 | 61.693 | H |
| ATOM | 2971 | O  | HOH A | 1 | 22.066 | 39.103 | 17.154 | O |
| ATOM | 2972 | H1 | HOH A | 2 | 22.879 | 38.639 | 17.444 | H |
| ATOM | 2973 | H2 | HOH A | 3 | 22.063 | 39.126 | 16.174 | H |
| ATOM | 2974 | O  | HOH A | 1 | 22.059 | 39.053 | 39.271 | O |
| ATOM | 2975 | H1 | HOH A | 2 | 22.866 | 38.586 | 39.572 | H |
| ATOM | 2976 | H2 | HOH A | 3 | 22.059 | 39.058 | 38.291 | H |
| ATOM | 2977 | O  | HOH A | 1 | 22.078 | 39.185 | 61.363 | O |
| ATOM | 2978 | H1 | HOH A | 2 | 22.887 | 38.721 | 61.666 | H |
| ATOM | 2979 | H2 | HOH A | 3 | 22.078 | 39.186 | 60.383 | H |
| ATOM | 2980 | O  | HOH A | 1 | 44.668 | 39.164 | 17.086 | O |
| ATOM | 2981 | H1 | HOH A | 2 | 45.478 | 38.699 | 17.383 | H |
| ATOM | 2982 | H2 | HOH A | 3 | 44.671 | 39.180 | 16.106 | H |
| ATOM | 2983 | O  | HOH A | 1 | 44.708 | 39.040 | 39.194 | O |
| ATOM | 2984 | H1 | HOH A | 2 | 45.516 | 38.573 | 39.494 | H |
| ATOM | 2985 | H2 | HOH A | 3 | 44.710 | 39.049 | 38.214 | H |
| ATOM | 2986 | O  | HOH A | 1 | 44.683 | 39.272 | 61.309 | O |
| ATOM | 2987 | H1 | HOH A | 2 | 45.491 | 38.810 | 61.616 | H |
| ATOM | 2988 | H2 | HOH A | 3 | 44.689 | 39.272 | 60.329 | H |
| ATOM | 2989 | O  | HOH A | 1 | 67.288 | 39.037 | 17.098 | O |
| ATOM | 2990 | H1 | HOH A | 2 | 68.090 | 38.566 | 17.408 | H |

|      |      |    |       |   |        |        |        |   |
|------|------|----|-------|---|--------|--------|--------|---|
| ATOM | 2991 | H2 | HOH A | 3 | 67.305 | 39.052 | 16.118 | H |
| ATOM | 2992 | O  | HOH A | 1 | 67.265 | 39.078 | 39.254 | O |
| ATOM | 2993 | H1 | HOH A | 2 | 68.073 | 38.611 | 39.554 | H |
| ATOM | 2994 | H2 | HOH A | 3 | 67.262 | 39.079 | 38.274 | H |
| ATOM | 2995 | O  | HOH A | 1 | 67.274 | 39.133 | 61.393 | O |
| ATOM | 2996 | H1 | HOH A | 2 | 68.083 | 38.669 | 61.693 | H |
| ATOM | 2997 | H2 | HOH A | 3 | 67.271 | 39.133 | 60.413 | H |
| ATOM | 2998 | O  | HOH A | 1 | 4.009  | 39.019 | 17.151 | O |
| ATOM | 2999 | H1 | HOH A | 2 | 4.007  | 39.945 | 17.471 | H |
| ATOM | 3000 | H2 | HOH A | 3 | 4.021  | 39.038 | 16.171 | H |
| ATOM | 3001 | O  | HOH A | 1 | 3.976  | 39.077 | 39.286 | O |
| ATOM | 3002 | H1 | HOH A | 2 | 3.979  | 40.001 | 39.613 | H |
| ATOM | 3003 | H2 | HOH A | 3 | 3.992  | 39.102 | 38.306 | H |
| ATOM | 3004 | O  | HOH A | 1 | 3.989  | 39.103 | 61.406 | O |
| ATOM | 3005 | H1 | HOH A | 2 | 3.982  | 40.028 | 61.729 | H |
| ATOM | 3006 | H2 | HOH A | 3 | 4.006  | 39.124 | 60.426 | H |
| ATOM | 3007 | O  | HOH A | 1 | 26.588 | 39.142 | 17.178 | O |
| ATOM | 3008 | H1 | HOH A | 2 | 26.587 | 40.067 | 17.502 | H |
| ATOM | 3009 | H2 | HOH A | 3 | 26.597 | 39.165 | 16.198 | H |
| ATOM | 3010 | O  | HOH A | 1 | 26.601 | 39.037 | 39.289 | O |
| ATOM | 3011 | H1 | HOH A | 2 | 26.598 | 39.962 | 39.610 | H |
| ATOM | 3012 | H2 | HOH A | 3 | 26.621 | 39.056 | 38.309 | H |
| ATOM | 3013 | O  | HOH A | 1 | 26.603 | 39.212 | 61.395 | O |
| ATOM | 3014 | H1 | HOH A | 2 | 26.595 | 40.139 | 61.715 | H |
| ATOM | 3015 | H2 | HOH A | 3 | 26.618 | 39.231 | 60.415 | H |
| ATOM | 3016 | O  | HOH A | 1 | 49.207 | 39.132 | 17.085 | O |
| ATOM | 3017 | H1 | HOH A | 2 | 49.207 | 40.055 | 17.413 | H |
| ATOM | 3018 | H2 | HOH A | 3 | 49.214 | 39.158 | 16.105 | H |
| ATOM | 3019 | O  | HOH A | 1 | 49.241 | 39.047 | 39.226 | O |
| ATOM | 3020 | H1 | HOH A | 2 | 49.239 | 39.973 | 39.547 | H |
| ATOM | 3021 | H2 | HOH A | 3 | 49.257 | 39.067 | 38.246 | H |
| ATOM | 3022 | O  | HOH A | 1 | 49.194 | 39.261 | 61.339 | O |
| ATOM | 3023 | H1 | HOH A | 2 | 49.190 | 40.189 | 61.656 | H |
| ATOM | 3024 | H2 | HOH A | 3 | 49.212 | 39.277 | 60.359 | H |
| ATOM | 3025 | O  | HOH A | 1 | 8.523  | 39.061 | 17.141 | O |
| ATOM | 3026 | H1 | HOH A | 2 | 9.330  | 38.616 | 17.475 | H |



|      |      |    |       |   |        |        |        |   |
|------|------|----|-------|---|--------|--------|--------|---|
| ATOM | 3027 | H2 | HOH A | 3 | 8.523  | 39.981 | 17.478 | H |
| ATOM | 3028 | O  | HOH A | 1 | 8.477  | 39.103 | 39.275 | O |
| ATOM | 3029 | H1 | HOH A | 2 | 9.283  | 38.656 | 39.607 | H |
| ATOM | 3030 | H2 | HOH A | 3 | 8.477  | 40.021 | 39.618 | H |
| ATOM | 3031 | O  | HOH A | 1 | 8.513  | 39.132 | 61.389 | O |
| ATOM | 3032 | H1 | HOH A | 2 | 9.318  | 38.684 | 61.723 | H |
| ATOM | 3033 | H2 | HOH A | 3 | 8.514  | 40.050 | 61.731 | H |
| ATOM | 3034 | O  | HOH A | 1 | 31.097 | 39.179 | 17.140 | O |
| ATOM | 3035 | H1 | HOH A | 2 | 31.906 | 38.732 | 17.467 | H |
| ATOM | 3036 | H2 | HOH A | 3 | 31.101 | 40.098 | 17.479 | H |
| ATOM | 3037 | O  | HOH A | 1 | 31.130 | 39.054 | 39.260 | O |
| ATOM | 3038 | H1 | HOH A | 2 | 31.941 | 38.612 | 39.587 | H |
| ATOM | 3039 | H2 | HOH A | 3 | 31.130 | 39.975 | 39.596 | H |
| ATOM | 3040 | O  | HOH A | 1 | 31.125 | 39.270 | 61.358 | O |
| ATOM | 3041 | H1 | HOH A | 2 | 31.933 | 38.828 | 61.693 | H |
| ATOM | 3042 | H2 | HOH A | 3 | 31.121 | 40.190 | 61.695 | H |
| ATOM | 3043 | O  | HOH A | 1 | 53.735 | 39.133 | 17.066 | O |
| ATOM | 3044 | H1 | HOH A | 2 | 54.541 | 38.680 | 17.393 | H |
| ATOM | 3045 | H2 | HOH A | 3 | 53.741 | 40.049 | 17.412 | H |
| ATOM | 3046 | O  | HOH A | 1 | 53.740 | 39.093 | 39.196 | O |
| ATOM | 3047 | H1 | HOH A | 2 | 54.550 | 38.649 | 39.522 | H |
| ATOM | 3048 | H2 | HOH A | 3 | 53.744 | 40.014 | 39.531 | H |
| ATOM | 3049 | O  | HOH A | 1 | 53.724 | 39.253 | 61.340 | O |
| ATOM | 3050 | H1 | HOH A | 2 | 54.532 | 38.809 | 61.670 | H |
| ATOM | 3051 | H2 | HOH A | 3 | 53.729 | 40.176 | 61.670 | H |
| ATOM | 3052 | O  | HOH A | 1 | 13.040 | 39.072 | 17.146 | O |
| ATOM | 3053 | H1 | HOH A | 2 | 13.837 | 38.612 | 17.482 | H |
| ATOM | 3054 | H2 | HOH A | 3 | 13.060 | 39.994 | 17.478 | H |
| ATOM | 3055 | O  | HOH A | 1 | 13.014 | 39.083 | 39.288 | O |
| ATOM | 3056 | H1 | HOH A | 2 | 13.815 | 38.629 | 39.625 | H |
| ATOM | 3057 | H2 | HOH A | 3 | 13.025 | 40.005 | 39.621 | H |
| ATOM | 3058 | O  | HOH A | 1 | 13.030 | 39.148 | 61.368 | O |
| ATOM | 3059 | H1 | HOH A | 2 | 13.828 | 38.693 | 61.709 | H |
| ATOM | 3060 | H2 | HOH A | 3 | 13.043 | 40.070 | 61.699 | H |
| ATOM | 3061 | O  | HOH A | 1 | 35.631 | 39.199 | 17.123 | O |
| ATOM | 3062 | H1 | HOH A | 2 | 36.434 | 38.743 | 17.449 | H |

|      |      |    |       |   |        |        |        |   |
|------|------|----|-------|---|--------|--------|--------|---|
| ATOM | 3063 | H2 | HOH A | 3 | 35.649 | 40.120 | 17.458 | H |
| ATOM | 3064 | O  | HOH A | 1 | 35.672 | 39.059 | 39.217 | O |
| ATOM | 3065 | H1 | HOH A | 2 | 36.470 | 38.601 | 39.556 | H |
| ATOM | 3066 | H2 | HOH A | 3 | 35.687 | 39.980 | 39.551 | H |
| ATOM | 3067 | O  | HOH A | 1 | 35.648 | 39.294 | 61.335 | O |
| ATOM | 3068 | H1 | HOH A | 2 | 36.450 | 38.839 | 61.667 | H |
| ATOM | 3069 | H2 | HOH A | 3 | 35.660 | 40.214 | 61.673 | H |
| ATOM | 3070 | O  | HOH A | 1 | 58.251 | 39.111 | 17.041 | O |
| ATOM | 3071 | H1 | HOH A | 2 | 59.048 | 38.655 | 17.384 | H |
| ATOM | 3072 | H2 | HOH A | 3 | 58.262 | 40.032 | 17.375 | H |
| ATOM | 3073 | O  | HOH A | 1 | 58.262 | 39.109 | 39.204 | O |
| ATOM | 3074 | H1 | HOH A | 2 | 59.055 | 38.642 | 39.542 | H |
| ATOM | 3075 | H2 | HOH A | 3 | 58.287 | 40.029 | 39.540 | H |
| ATOM | 3076 | O  | HOH A | 1 | 58.262 | 39.217 | 61.335 | O |
| ATOM | 3077 | H1 | HOH A | 2 | 59.062 | 38.762 | 61.672 | H |
| ATOM | 3078 | H2 | HOH A | 3 | 58.276 | 40.139 | 61.665 | H |
| ATOM | 3079 | O  | HOH A | 1 | 17.559 | 39.069 | 17.164 | O |
| ATOM | 3080 | H1 | HOH A | 2 | 16.756 | 38.604 | 17.482 | H |
| ATOM | 3081 | H2 | HOH A | 3 | 17.537 | 39.075 | 16.185 | H |
| ATOM | 3082 | O  | HOH A | 1 | 17.556 | 39.068 | 39.296 | O |
| ATOM | 3083 | H1 | HOH A | 2 | 16.749 | 38.615 | 39.618 | H |
| ATOM | 3084 | H2 | HOH A | 3 | 17.536 | 39.061 | 38.316 | H |
| ATOM | 3085 | O  | HOH A | 1 | 17.558 | 39.134 | 61.390 | O |
| ATOM | 3086 | H1 | HOH A | 2 | 16.749 | 38.675 | 61.700 | H |
| ATOM | 3087 | H2 | HOH A | 3 | 17.556 | 39.124 | 60.411 | H |
| ATOM | 3088 | O  | HOH A | 1 | 40.170 | 39.180 | 17.113 | O |
| ATOM | 3089 | H1 | HOH A | 2 | 39.362 | 38.724 | 17.430 | H |
| ATOM | 3090 | H2 | HOH A | 3 | 40.154 | 39.178 | 16.133 | H |
| ATOM | 3091 | O  | HOH A | 1 | 40.212 | 39.026 | 39.231 | O |
| ATOM | 3092 | H1 | HOH A | 2 | 39.403 | 38.571 | 39.545 | H |
| ATOM | 3093 | H2 | HOH A | 3 | 40.202 | 39.020 | 38.251 | H |
| ATOM | 3094 | O  | HOH A | 1 | 40.185 | 39.284 | 61.346 | O |
| ATOM | 3095 | H1 | HOH A | 2 | 39.378 | 38.830 | 61.667 | H |
| ATOM | 3096 | H2 | HOH A | 3 | 40.174 | 39.264 | 60.367 | H |
| ATOM | 3097 | O  | HOH A | 1 | 62.794 | 39.060 | 17.092 | O |
| ATOM | 3098 | H1 | HOH A | 2 | 61.982 | 38.610 | 17.405 | H |

|      |      |    |       |   |        |        |        |   |
|------|------|----|-------|---|--------|--------|--------|---|
| ATOM | 3099 | H2 | HOH A | 3 | 62.782 | 39.061 | 16.112 | H |
| ATOM | 3100 | O  | HOH A | 1 | 62.778 | 39.076 | 39.244 | O |
| ATOM | 3101 | H1 | HOH A | 2 | 61.972 | 38.616 | 39.561 | H |
| ATOM | 3102 | H2 | HOH A | 3 | 62.765 | 39.068 | 38.264 | H |
| ATOM | 3103 | O  | HOH A | 1 | 62.798 | 39.152 | 61.377 | O |
| ATOM | 3104 | H1 | HOH A | 2 | 61.987 | 38.699 | 61.689 | H |
| ATOM | 3105 | H2 | HOH A | 3 | 62.789 | 39.148 | 60.397 | H |
| ATOM | 3106 | O  | HOH A | 1 | 1.748  | 42.954 | 17.110 | O |
| ATOM | 3107 | H1 | HOH A | 2 | 0.945  | 42.491 | 17.429 | H |
| ATOM | 3108 | H2 | HOH A | 3 | 1.728  | 42.955 | 16.130 | H |
| ATOM | 3109 | O  | HOH A | 1 | 1.730  | 42.981 | 39.247 | O |
| ATOM | 3110 | H1 | HOH A | 2 | 0.928  | 42.516 | 39.565 | H |
| ATOM | 3111 | H2 | HOH A | 3 | 1.712  | 42.981 | 38.267 | H |
| ATOM | 3112 | O  | HOH A | 1 | 1.728  | 43.045 | 61.376 | O |
| ATOM | 3113 | H1 | HOH A | 2 | 0.921  | 42.592 | 61.698 | H |
| ATOM | 3114 | H2 | HOH A | 3 | 1.709  | 43.037 | 60.396 | H |
| ATOM | 3115 | O  | HOH A | 1 | 24.324 | 43.042 | 17.135 | O |
| ATOM | 3116 | H1 | HOH A | 2 | 23.530 | 42.564 | 17.455 | H |
| ATOM | 3117 | H2 | HOH A | 3 | 24.297 | 43.050 | 16.155 | H |
| ATOM | 3118 | O  | HOH A | 1 | 24.330 | 42.972 | 39.238 | O |
| ATOM | 3119 | H1 | HOH A | 2 | 23.528 | 42.511 | 39.560 | H |
| ATOM | 3120 | H2 | HOH A | 3 | 24.308 | 42.970 | 38.259 | H |
| ATOM | 3121 | O  | HOH A | 1 | 24.344 | 43.121 | 61.351 | O |
| ATOM | 3122 | H1 | HOH A | 2 | 23.547 | 42.656 | 61.679 | H |
| ATOM | 3123 | H2 | HOH A | 3 | 24.320 | 43.111 | 60.372 | H |
| ATOM | 3124 | O  | HOH A | 1 | 46.941 | 43.074 | 17.056 | O |
| ATOM | 3125 | H1 | HOH A | 2 | 46.134 | 42.619 | 17.374 | H |
| ATOM | 3126 | H2 | HOH A | 3 | 46.925 | 43.071 | 16.077 | H |
| ATOM | 3127 | O  | HOH A | 1 | 46.972 | 42.958 | 39.182 | O |
| ATOM | 3128 | H1 | HOH A | 2 | 46.167 | 42.501 | 39.502 | H |
| ATOM | 3129 | H2 | HOH A | 3 | 46.951 | 42.959 | 38.202 | H |
| ATOM | 3130 | O  | HOH A | 1 | 46.939 | 43.181 | 61.311 | O |
| ATOM | 3131 | H1 | HOH A | 2 | 46.139 | 42.716 | 61.634 | H |
| ATOM | 3132 | H2 | HOH A | 3 | 46.924 | 43.166 | 60.332 | H |
| ATOM | 3133 | O  | HOH A | 1 | 6.247  | 42.972 | 17.142 | O |
| ATOM | 3134 | H1 | HOH A | 2 | 5.445  | 42.510 | 17.463 | H |

|      |      |    |       |   |        |        |        |   |
|------|------|----|-------|---|--------|--------|--------|---|
| ATOM | 3135 | H2 | HOH A | 3 | 6.234  | 42.955 | 16.162 | H |
| ATOM | 3136 | O  | HOH A | 1 | 6.216  | 43.029 | 39.292 | O |
| ATOM | 3137 | H1 | HOH A | 2 | 5.419  | 42.557 | 39.613 | H |
| ATOM | 3138 | H2 | HOH A | 3 | 6.202  | 43.016 | 38.312 | H |
| ATOM | 3139 | O  | HOH A | 1 | 6.220  | 43.043 | 61.398 | O |
| ATOM | 3140 | H1 | HOH A | 2 | 5.419  | 42.577 | 61.717 | H |
| ATOM | 3141 | H2 | HOH A | 3 | 6.204  | 43.038 | 60.418 | H |
| ATOM | 3142 | O  | HOH A | 1 | 28.827 | 43.115 | 17.162 | O |
| ATOM | 3143 | H1 | HOH A | 2 | 28.031 | 42.645 | 17.487 | H |
| ATOM | 3144 | H2 | HOH A | 3 | 28.807 | 43.104 | 16.183 | H |
| ATOM | 3145 | O  | HOH A | 1 | 28.831 | 42.985 | 39.261 | O |
| ATOM | 3146 | H1 | HOH A | 2 | 28.026 | 42.523 | 39.576 | H |
| ATOM | 3147 | H2 | HOH A | 3 | 28.821 | 42.978 | 38.282 | H |
| ATOM | 3148 | O  | HOH A | 1 | 28.840 | 43.177 | 61.370 | O |
| ATOM | 3149 | H1 | HOH A | 2 | 28.046 | 42.704 | 61.695 | H |
| ATOM | 3150 | H2 | HOH A | 3 | 28.823 | 43.161 | 60.390 | H |
| ATOM | 3151 | O  | HOH A | 1 | 51.453 | 43.076 | 17.073 | O |
| ATOM | 3152 | H1 | HOH A | 2 | 50.653 | 42.609 | 17.391 | H |
| ATOM | 3153 | H2 | HOH A | 3 | 51.439 | 43.070 | 16.093 | H |
| ATOM | 3154 | O  | HOH A | 1 | 51.471 | 43.012 | 39.213 | O |
| ATOM | 3155 | H1 | HOH A | 2 | 50.672 | 42.541 | 39.533 | H |
| ATOM | 3156 | H2 | HOH A | 3 | 51.459 | 42.995 | 38.233 | H |
| ATOM | 3157 | O  | HOH A | 1 | 51.434 | 43.194 | 61.351 | O |
| ATOM | 3158 | H1 | HOH A | 2 | 50.634 | 42.726 | 61.669 | H |
| ATOM | 3159 | H2 | HOH A | 3 | 51.425 | 43.177 | 60.371 | H |
| ATOM | 3160 | O  | HOH A | 1 | 10.770 | 42.966 | 17.178 | O |
| ATOM | 3161 | H1 | HOH A | 2 | 10.757 | 43.898 | 17.483 | H |
| ATOM | 3162 | H2 | HOH A | 3 | 10.771 | 42.968 | 16.198 | H |
| ATOM | 3163 | O  | HOH A | 1 | 10.743 | 42.991 | 39.314 | O |
| ATOM | 3164 | H1 | HOH A | 2 | 10.742 | 43.921 | 39.622 | H |
| ATOM | 3165 | H2 | HOH A | 3 | 10.736 | 42.996 | 38.334 | H |
| ATOM | 3166 | O  | HOH A | 1 | 10.762 | 43.041 | 61.416 | O |
| ATOM | 3167 | H1 | HOH A | 2 | 10.765 | 43.970 | 61.726 | H |
| ATOM | 3168 | H2 | HOH A | 3 | 10.761 | 43.048 | 60.436 | H |
| ATOM | 3169 | O  | HOH A | 1 | 33.352 | 43.091 | 17.165 | O |
| ATOM | 3170 | H1 | HOH A | 2 | 33.348 | 44.018 | 17.484 | H |

|      |      |    |       |   |        |        |        |   |
|------|------|----|-------|---|--------|--------|--------|---|
| ATOM | 3171 | H2 | HOH A | 3 | 33.345 | 43.109 | 16.185 | H |
| ATOM | 3172 | O  | HOH A | 1 | 33.365 | 42.954 | 39.281 | O |
| ATOM | 3173 | H1 | HOH A | 2 | 33.360 | 43.885 | 39.585 | H |
| ATOM | 3174 | H2 | HOH A | 3 | 33.364 | 42.955 | 38.301 | H |
| ATOM | 3175 | O  | HOH A | 1 | 33.376 | 43.189 | 61.386 | O |
| ATOM | 3176 | H1 | HOH A | 2 | 33.375 | 44.121 | 61.689 | H |
| ATOM | 3177 | H2 | HOH A | 3 | 33.371 | 43.188 | 60.406 | H |
| ATOM | 3178 | O  | HOH A | 1 | 55.976 | 43.028 | 17.100 | O |
| ATOM | 3179 | H1 | HOH A | 2 | 55.978 | 43.957 | 17.410 | H |
| ATOM | 3180 | H2 | HOH A | 3 | 55.977 | 43.036 | 16.120 | H |
| ATOM | 3181 | O  | HOH A | 1 | 55.988 | 42.999 | 39.238 | O |
| ATOM | 3182 | H1 | HOH A | 2 | 55.997 | 43.928 | 39.548 | H |
| ATOM | 3183 | H2 | HOH A | 3 | 55.985 | 43.006 | 38.258 | H |
| ATOM | 3184 | O  | HOH A | 1 | 55.968 | 43.127 | 61.365 | O |
| ATOM | 3185 | H1 | HOH A | 2 | 55.968 | 44.055 | 61.680 | H |
| ATOM | 3186 | H2 | HOH A | 3 | 55.970 | 43.140 | 60.385 | H |
| ATOM | 3187 | O  | HOH A | 1 | 15.288 | 42.993 | 17.169 | O |
| ATOM | 3188 | H1 | HOH A | 2 | 16.088 | 42.528 | 17.491 | H |
| ATOM | 3189 | H2 | HOH A | 3 | 15.302 | 42.979 | 16.189 | H |
| ATOM | 3190 | O  | HOH A | 1 | 15.264 | 42.979 | 39.328 | O |
| ATOM | 3191 | H1 | HOH A | 2 | 16.071 | 42.518 | 39.640 | H |
| ATOM | 3192 | H2 | HOH A | 3 | 15.268 | 42.968 | 38.348 | H |
| ATOM | 3193 | O  | HOH A | 1 | 15.282 | 43.045 | 61.406 | O |
| ATOM | 3194 | H1 | HOH A | 2 | 16.083 | 42.578 | 61.723 | H |
| ATOM | 3195 | H2 | HOH A | 3 | 15.291 | 43.031 | 60.427 | H |
| ATOM | 3196 | O  | HOH A | 1 | 37.880 | 43.094 | 17.137 | O |
| ATOM | 3197 | H1 | HOH A | 2 | 38.685 | 42.630 | 17.449 | H |
| ATOM | 3198 | H2 | HOH A | 3 | 37.889 | 43.091 | 16.157 | H |
| ATOM | 3199 | O  | HOH A | 1 | 37.904 | 42.957 | 39.244 | O |
| ATOM | 3200 | H1 | HOH A | 2 | 38.705 | 42.489 | 39.563 | H |
| ATOM | 3201 | H2 | HOH A | 3 | 37.917 | 42.944 | 38.264 | H |
| ATOM | 3202 | O  | HOH A | 1 | 37.881 | 43.196 | 61.364 | O |
| ATOM | 3203 | H1 | HOH A | 2 | 38.686 | 42.739 | 61.685 | H |
| ATOM | 3204 | H2 | HOH A | 3 | 37.892 | 43.177 | 60.384 | H |
| ATOM | 3205 | O  | HOH A | 1 | 60.491 | 42.995 | 17.100 | O |
| ATOM | 3206 | H1 | HOH A | 2 | 61.293 | 42.527 | 17.414 | H |

|      |      |    |       |   |        |        |        |   |
|------|------|----|-------|---|--------|--------|--------|---|
| ATOM | 3207 | H2 | HOH A | 3 | 60.501 | 42.989 | 16.120 | H |
| ATOM | 3208 | O  | HOH A | 1 | 60.499 | 43.008 | 39.240 | O |
| ATOM | 3209 | H1 | HOH A | 2 | 61.300 | 42.538 | 39.554 | H |
| ATOM | 3210 | H2 | HOH A | 3 | 60.507 | 42.998 | 38.261 | H |
| ATOM | 3211 | O  | HOH A | 1 | 60.487 | 43.095 | 61.389 | O |
| ATOM | 3212 | H1 | HOH A | 2 | 61.289 | 42.627 | 61.702 | H |
| ATOM | 3213 | H2 | HOH A | 3 | 60.492 | 43.083 | 60.409 | H |
| ATOM | 3214 | O  | HOH A | 1 | 19.797 | 42.996 | 17.167 | O |
| ATOM | 3215 | H1 | HOH A | 2 | 18.996 | 42.531 | 17.488 | H |
| ATOM | 3216 | H2 | HOH A | 3 | 19.771 | 43.004 | 16.188 | H |
| ATOM | 3217 | O  | HOH A | 1 | 19.802 | 42.975 | 39.290 | O |
| ATOM | 3218 | H1 | HOH A | 2 | 19.004 | 42.506 | 39.614 | H |
| ATOM | 3219 | H2 | HOH A | 3 | 19.771 | 42.983 | 38.311 | H |
| ATOM | 3220 | O  | HOH A | 1 | 19.803 | 43.080 | 61.388 | O |
| ATOM | 3221 | H1 | HOH A | 2 | 19.008 | 42.609 | 61.714 | H |
| ATOM | 3222 | H2 | HOH A | 3 | 19.775 | 43.080 | 60.408 | H |
| ATOM | 3223 | O  | HOH A | 1 | 42.404 | 43.096 | 17.113 | O |
| ATOM | 3224 | H1 | HOH A | 2 | 41.603 | 42.629 | 17.429 | H |
| ATOM | 3225 | H2 | HOH A | 3 | 42.381 | 43.108 | 16.133 | H |
| ATOM | 3226 | O  | HOH A | 1 | 42.439 | 42.954 | 39.220 | O |
| ATOM | 3227 | H1 | HOH A | 2 | 41.638 | 42.488 | 39.540 | H |
| ATOM | 3228 | H2 | HOH A | 3 | 42.420 | 42.948 | 38.240 | H |
| ATOM | 3229 | O  | HOH A | 1 | 42.418 | 43.190 | 61.337 | O |
| ATOM | 3230 | H1 | HOH A | 2 | 41.616 | 42.731 | 61.664 | H |
| ATOM | 3231 | H2 | HOH A | 3 | 42.392 | 43.185 | 60.358 | H |
| ATOM | 3232 | O  | HOH A | 1 | 65.024 | 42.960 | 17.116 | O |
| ATOM | 3233 | H1 | HOH A | 2 | 64.220 | 42.499 | 17.436 | H |
| ATOM | 3234 | H2 | HOH A | 3 | 65.002 | 42.963 | 16.136 | H |
| ATOM | 3235 | O  | HOH A | 1 | 65.014 | 42.990 | 39.256 | O |
| ATOM | 3236 | H1 | HOH A | 2 | 64.214 | 42.528 | 39.583 | H |
| ATOM | 3237 | H2 | HOH A | 3 | 64.988 | 42.984 | 38.276 | H |
| ATOM | 3238 | O  | HOH A | 1 | 65.008 | 43.060 | 61.390 | O |
| ATOM | 3239 | H1 | HOH A | 2 | 64.205 | 42.601 | 61.712 | H |
| ATOM | 3240 | H2 | HOH A | 3 | 64.988 | 43.056 | 60.410 | H |
| ATOM | 3241 | O  | HOH A | 1 | 22.073 | 46.954 | 14.388 | O |
| ATOM | 3242 | H1 | HOH A | 2 | 21.268 | 46.495 | 14.068 | H |

|      |      |    |       |   |        |        |        |   |
|------|------|----|-------|---|--------|--------|--------|---|
| ATOM | 3243 | H2 | HOH A | 3 | 22.055 | 46.949 | 15.368 | H |
| ATOM | 3244 | O  | HOH A | 1 | 22.068 | 46.881 | 36.514 | O |
| ATOM | 3245 | H1 | HOH A | 2 | 21.258 | 46.432 | 36.194 | H |
| ATOM | 3246 | H2 | HOH A | 3 | 22.048 | 46.881 | 37.493 | H |
| ATOM | 3247 | O  | HOH A | 1 | 22.079 | 47.003 | 58.603 | O |
| ATOM | 3248 | H1 | HOH A | 2 | 21.272 | 46.542 | 58.289 | H |
| ATOM | 3249 | H2 | HOH A | 3 | 22.064 | 47.007 | 59.583 | H |
| ATOM | 3250 | O  | HOH A | 1 | 44.680 | 47.036 | 14.318 | O |
| ATOM | 3251 | H1 | HOH A | 2 | 43.867 | 46.591 | 13.999 | H |
| ATOM | 3252 | H2 | HOH A | 3 | 44.668 | 47.024 | 15.297 | H |
| ATOM | 3253 | O  | HOH A | 1 | 44.713 | 46.869 | 36.441 | O |
| ATOM | 3254 | H1 | HOH A | 2 | 43.901 | 46.414 | 36.135 | H |
| ATOM | 3255 | H2 | HOH A | 3 | 44.703 | 46.879 | 37.421 | H |
| ATOM | 3256 | O  | HOH A | 1 | 44.676 | 47.078 | 58.568 | O |
| ATOM | 3257 | H1 | HOH A | 2 | 43.863 | 46.626 | 58.257 | H |
| ATOM | 3258 | H2 | HOH A | 3 | 44.664 | 47.084 | 59.548 | H |
| ATOM | 3259 | O  | HOH A | 1 | 67.289 | 46.878 | 14.338 | O |
| ATOM | 3260 | H1 | HOH A | 2 | 66.473 | 46.434 | 14.025 | H |
| ATOM | 3261 | H2 | HOH A | 3 | 67.276 | 46.881 | 15.317 | H |
| ATOM | 3262 | O  | HOH A | 1 | 67.266 | 46.903 | 36.491 | O |
| ATOM | 3263 | H1 | HOH A | 2 | 66.454 | 46.456 | 36.173 | H |
| ATOM | 3264 | H2 | HOH A | 3 | 67.250 | 46.900 | 37.470 | H |
| ATOM | 3265 | O  | HOH A | 1 | 67.277 | 46.978 | 58.618 | O |
| ATOM | 3266 | H1 | HOH A | 2 | 66.470 | 46.523 | 58.296 | H |
| ATOM | 3267 | H2 | HOH A | 3 | 67.257 | 46.973 | 59.597 | H |
| ATOM | 3268 | O  | HOH A | 1 | 3.998  | 46.875 | 14.353 | O |
| ATOM | 3269 | H1 | HOH A | 2 | 3.195  | 46.408 | 14.042 | H |
| ATOM | 3270 | H2 | HOH A | 3 | 3.986  | 46.879 | 15.333 | H |
| ATOM | 3271 | O  | HOH A | 1 | 3.977  | 46.929 | 36.516 | O |
| ATOM | 3272 | H1 | HOH A | 2 | 3.173  | 46.466 | 36.200 | H |
| ATOM | 3273 | H2 | HOH A | 3 | 3.966  | 46.922 | 37.496 | H |
| ATOM | 3274 | O  | HOH A | 1 | 3.987  | 46.980 | 58.624 | O |
| ATOM | 3275 | H1 | HOH A | 2 | 3.181  | 46.521 | 58.308 | H |
| ATOM | 3276 | H2 | HOH A | 3 | 3.972  | 46.976 | 59.604 | H |
| ATOM | 3277 | O  | HOH A | 1 | 26.571 | 47.020 | 14.386 | O |
| ATOM | 3278 | H1 | HOH A | 2 | 25.772 | 46.554 | 14.062 | H |

|      |      |    |       |   |        |        |        |   |
|------|------|----|-------|---|--------|--------|--------|---|
| ATOM | 3279 | H2 | HOH A | 3 | 26.554 | 47.006 | 15.365 | H |
| ATOM | 3280 | O  | HOH A | 1 | 26.591 | 46.911 | 36.499 | O |
| ATOM | 3281 | H1 | HOH A | 2 | 25.785 | 46.448 | 36.188 | H |
| ATOM | 3282 | H2 | HOH A | 3 | 26.585 | 46.904 | 37.479 | H |
| ATOM | 3283 | O  | HOH A | 1 | 26.592 | 47.056 | 58.596 | O |
| ATOM | 3284 | H1 | HOH A | 2 | 25.791 | 46.586 | 58.285 | H |
| ATOM | 3285 | H2 | HOH A | 3 | 26.583 | 47.054 | 59.576 | H |
| ATOM | 3286 | O  | HOH A | 1 | 49.192 | 47.021 | 14.300 | O |
| ATOM | 3287 | H1 | HOH A | 2 | 48.389 | 46.554 | 13.986 | H |
| ATOM | 3288 | H2 | HOH A | 3 | 49.183 | 47.012 | 15.280 | H |
| ATOM | 3289 | O  | HOH A | 1 | 49.221 | 46.902 | 36.437 | O |
| ATOM | 3290 | H1 | HOH A | 2 | 48.416 | 46.439 | 36.122 | H |
| ATOM | 3291 | H2 | HOH A | 3 | 49.212 | 46.893 | 37.417 | H |
| ATOM | 3292 | O  | HOH A | 1 | 49.188 | 47.082 | 58.568 | O |
| ATOM | 3293 | H1 | HOH A | 2 | 48.381 | 46.625 | 58.252 | H |
| ATOM | 3294 | H2 | HOH A | 3 | 49.176 | 47.076 | 59.548 | H |
| ATOM | 3295 | O  | HOH A | 1 | 8.511  | 46.862 | 14.384 | O |
| ATOM | 3296 | H1 | HOH A | 2 | 9.301  | 46.387 | 14.052 | H |
| ATOM | 3297 | H2 | HOH A | 3 | 7.715  | 46.400 | 14.046 | H |
| ATOM | 3298 | O  | HOH A | 1 | 8.497  | 46.902 | 36.539 | O |
| ATOM | 3299 | H1 | HOH A | 2 | 9.290  | 46.430 | 36.208 | H |
| ATOM | 3300 | H2 | HOH A | 3 | 7.704  | 46.438 | 36.197 | H |
| ATOM | 3301 | O  | HOH A | 1 | 8.504  | 46.946 | 58.651 | O |
| ATOM | 3302 | H1 | HOH A | 2 | 9.298  | 46.478 | 58.317 | H |
| ATOM | 3303 | H2 | HOH A | 3 | 7.712  | 46.481 | 58.308 | H |
| ATOM | 3304 | O  | HOH A | 1 | 31.103 | 47.030 | 14.388 | O |
| ATOM | 3305 | H1 | HOH A | 2 | 31.891 | 46.564 | 14.038 | H |
| ATOM | 3306 | H2 | HOH A | 3 | 30.305 | 46.576 | 14.046 | H |
| ATOM | 3307 | O  | HOH A | 1 | 31.113 | 46.877 | 36.496 | O |
| ATOM | 3308 | H1 | HOH A | 2 | 31.906 | 46.408 | 36.161 | H |
| ATOM | 3309 | H2 | HOH A | 3 | 30.320 | 46.413 | 36.155 | H |
| ATOM | 3310 | O  | HOH A | 1 | 31.112 | 47.055 | 58.601 | O |
| ATOM | 3311 | H1 | HOH A | 2 | 31.905 | 46.588 | 58.264 | H |
| ATOM | 3312 | H2 | HOH A | 3 | 30.320 | 46.588 | 58.262 | H |
| ATOM | 3313 | O  | HOH A | 1 | 53.721 | 46.961 | 14.316 | O |
| ATOM | 3314 | H1 | HOH A | 2 | 54.501 | 46.472 | 13.982 | H |



|      |      |    |       |   |        |        |        |   |
|------|------|----|-------|---|--------|--------|--------|---|
| ATOM | 3315 | H2 | HOH A | 3 | 52.916 | 46.512 | 13.982 | H |
| ATOM | 3316 | O  | HOH A | 1 | 53.732 | 46.883 | 36.456 | O |
| ATOM | 3317 | H1 | HOH A | 2 | 54.523 | 46.415 | 36.114 | H |
| ATOM | 3318 | H2 | HOH A | 3 | 52.937 | 46.424 | 36.111 | H |
| ATOM | 3319 | O  | HOH A | 1 | 53.704 | 47.044 | 58.587 | O |
| ATOM | 3320 | H1 | HOH A | 2 | 54.492 | 46.570 | 58.248 | H |
| ATOM | 3321 | H2 | HOH A | 3 | 52.906 | 46.583 | 58.255 | H |
| ATOM | 3322 | O  | HOH A | 1 | 13.018 | 46.868 | 14.380 | O |
| ATOM | 3323 | H1 | HOH A | 2 | 12.218 | 46.396 | 14.068 | H |
| ATOM | 3324 | H2 | HOH A | 3 | 13.002 | 46.874 | 15.360 | H |
| ATOM | 3325 | O  | HOH A | 1 | 13.012 | 46.887 | 36.526 | O |
| ATOM | 3326 | H1 | HOH A | 2 | 12.210 | 46.420 | 36.211 | H |
| ATOM | 3327 | H2 | HOH A | 3 | 12.996 | 46.887 | 37.506 | H |
| ATOM | 3328 | O  | HOH A | 1 | 13.022 | 46.948 | 58.626 | O |
| ATOM | 3329 | H1 | HOH A | 2 | 12.225 | 46.472 | 58.313 | H |
| ATOM | 3330 | H2 | HOH A | 3 | 13.010 | 46.948 | 59.606 | H |
| ATOM | 3331 | O  | HOH A | 1 | 35.618 | 47.032 | 14.352 | O |
| ATOM | 3332 | H1 | HOH A | 2 | 34.816 | 46.566 | 14.035 | H |
| ATOM | 3333 | H2 | HOH A | 3 | 35.609 | 47.019 | 15.331 | H |
| ATOM | 3334 | O  | HOH A | 1 | 35.655 | 46.859 | 36.471 | O |
| ATOM | 3335 | H1 | HOH A | 2 | 34.853 | 46.390 | 36.160 | H |
| ATOM | 3336 | H2 | HOH A | 3 | 35.645 | 46.861 | 37.451 | H |
| ATOM | 3337 | O  | HOH A | 1 | 35.627 | 47.078 | 58.576 | O |
| ATOM | 3338 | H1 | HOH A | 2 | 34.829 | 46.605 | 58.260 | H |
| ATOM | 3339 | H2 | HOH A | 3 | 35.609 | 47.079 | 59.556 | H |
| ATOM | 3340 | O  | HOH A | 1 | 58.233 | 46.920 | 14.298 | O |
| ATOM | 3341 | H1 | HOH A | 2 | 57.430 | 46.452 | 13.989 | H |
| ATOM | 3342 | H2 | HOH A | 3 | 58.225 | 46.920 | 15.278 | H |
| ATOM | 3343 | O  | HOH A | 1 | 58.240 | 46.909 | 36.446 | O |
| ATOM | 3344 | H1 | HOH A | 2 | 57.440 | 46.440 | 36.128 | H |
| ATOM | 3345 | H2 | HOH A | 3 | 58.223 | 46.907 | 37.425 | H |
| ATOM | 3346 | O  | HOH A | 1 | 58.224 | 47.010 | 58.579 | O |
| ATOM | 3347 | H1 | HOH A | 2 | 57.421 | 46.542 | 58.268 | H |
| ATOM | 3348 | H2 | HOH A | 3 | 58.211 | 47.016 | 59.559 | H |
| ATOM | 3349 | O  | HOH A | 1 | 17.541 | 46.886 | 14.390 | O |
| ATOM | 3350 | H1 | HOH A | 2 | 17.536 | 47.818 | 14.085 | H |

|      |      |    |       |   |        |        |        |   |
|------|------|----|-------|---|--------|--------|--------|---|
| ATOM | 3351 | H2 | HOH A | 3 | 17.542 | 46.889 | 15.370 | H |
| ATOM | 3352 | O  | HOH A | 1 | 17.520 | 46.871 | 36.539 | O |
| ATOM | 3353 | H1 | HOH A | 2 | 17.522 | 47.804 | 36.238 | H |
| ATOM | 3354 | H2 | HOH A | 3 | 17.522 | 46.869 | 37.519 | H |
| ATOM | 3355 | O  | HOH A | 1 | 17.543 | 46.946 | 58.627 | O |
| ATOM | 3356 | H1 | HOH A | 2 | 17.542 | 47.878 | 58.323 | H |
| ATOM | 3357 | H2 | HOH A | 3 | 17.543 | 46.947 | 59.607 | H |
| ATOM | 3358 | O  | HOH A | 1 | 40.148 | 47.037 | 14.362 | O |
| ATOM | 3359 | H1 | HOH A | 2 | 40.152 | 47.970 | 14.063 | H |
| ATOM | 3360 | H2 | HOH A | 3 | 40.148 | 47.033 | 15.342 | H |
| ATOM | 3361 | O  | HOH A | 1 | 40.174 | 46.842 | 36.479 | O |
| ATOM | 3362 | H1 | HOH A | 2 | 40.166 | 47.773 | 36.175 | H |
| ATOM | 3363 | H2 | HOH A | 3 | 40.174 | 46.844 | 37.459 | H |
| ATOM | 3364 | O  | HOH A | 1 | 40.146 | 47.069 | 58.587 | O |
| ATOM | 3365 | H1 | HOH A | 2 | 40.147 | 48.000 | 58.282 | H |
| ATOM | 3366 | H2 | HOH A | 3 | 40.147 | 47.071 | 59.567 | H |
| ATOM | 3367 | O  | HOH A | 1 | 62.748 | 46.881 | 14.349 | O |
| ATOM | 3368 | H1 | HOH A | 2 | 62.744 | 47.812 | 14.042 | H |
| ATOM | 3369 | H2 | HOH A | 3 | 62.747 | 46.886 | 15.329 | H |
| ATOM | 3370 | O  | HOH A | 1 | 62.741 | 46.886 | 36.485 | O |
| ATOM | 3371 | H1 | HOH A | 2 | 62.737 | 47.817 | 36.180 | H |
| ATOM | 3372 | H2 | HOH A | 3 | 62.741 | 46.889 | 37.465 | H |
| ATOM | 3373 | O  | HOH A | 1 | 62.747 | 46.958 | 58.625 | O |
| ATOM | 3374 | H1 | HOH A | 2 | 62.749 | 47.888 | 58.318 | H |
| ATOM | 3375 | H2 | HOH A | 3 | 62.741 | 46.963 | 59.605 | H |
| ATOM | 3376 | O  | HOH A | 1 | 1.744  | 27.316 | 14.326 | O |
| ATOM | 3377 | H1 | HOH A | 2 | 2.538  | 26.842 | 14.002 | H |
| ATOM | 3378 | H2 | HOH A | 3 | 1.763  | 27.304 | 15.306 | H |
| ATOM | 3379 | O  | HOH A | 1 | 1.704  | 27.357 | 36.490 | O |
| ATOM | 3380 | H1 | HOH A | 2 | 2.501  | 26.887 | 36.167 | H |
| ATOM | 3381 | H2 | HOH A | 3 | 1.718  | 27.340 | 37.470 | H |
| ATOM | 3382 | O  | HOH A | 1 | 1.733  | 27.408 | 58.604 | O |
| ATOM | 3383 | H1 | HOH A | 2 | 2.528  | 26.940 | 58.275 | H |
| ATOM | 3384 | H2 | HOH A | 3 | 1.751  | 27.386 | 59.583 | H |
| ATOM | 3385 | O  | HOH A | 1 | 24.323 | 27.434 | 14.379 | O |
| ATOM | 3386 | H1 | HOH A | 2 | 25.128 | 26.974 | 14.063 | H |

|      |      |    |       |   |        |        |        |   |
|------|------|----|-------|---|--------|--------|--------|---|
| ATOM | 3387 | H2 | HOH A | 3 | 24.330 | 27.419 | 15.359 | H |
| ATOM | 3388 | O  | HOH A | 1 | 24.323 | 27.328 | 36.499 | O |
| ATOM | 3389 | H1 | HOH A | 2 | 25.123 | 26.861 | 36.178 | H |
| ATOM | 3390 | H2 | HOH A | 3 | 24.337 | 27.316 | 37.479 | H |
| ATOM | 3391 | O  | HOH A | 1 | 24.317 | 27.469 | 58.596 | O |
| ATOM | 3392 | H1 | HOH A | 2 | 25.118 | 27.008 | 58.271 | H |
| ATOM | 3393 | H2 | HOH A | 3 | 24.336 | 27.452 | 59.576 | H |
| ATOM | 3394 | O  | HOH A | 1 | 46.927 | 27.484 | 14.296 | O |
| ATOM | 3395 | H1 | HOH A | 2 | 47.720 | 27.010 | 13.969 | H |
| ATOM | 3396 | H2 | HOH A | 3 | 46.945 | 27.464 | 15.275 | H |
| ATOM | 3397 | O  | HOH A | 1 | 46.960 | 27.327 | 36.429 | O |
| ATOM | 3398 | H1 | HOH A | 2 | 47.759 | 26.860 | 36.106 | H |
| ATOM | 3399 | H2 | HOH A | 3 | 46.977 | 27.314 | 37.408 | H |
| ATOM | 3400 | O  | HOH A | 1 | 46.920 | 27.517 | 58.558 | O |
| ATOM | 3401 | H1 | HOH A | 2 | 47.719 | 27.047 | 58.237 | H |
| ATOM | 3402 | H2 | HOH A | 3 | 46.936 | 27.507 | 59.537 | H |
| ATOM | 3403 | O  | HOH A | 1 | 6.268  | 27.290 | 14.389 | O |
| ATOM | 3404 | H1 | HOH A | 2 | 7.061  | 26.816 | 14.062 | H |
| ATOM | 3405 | H2 | HOH A | 3 | 5.475  | 26.827 | 14.045 | H |
| ATOM | 3406 | O  | HOH A | 1 | 6.243  | 27.324 | 36.542 | O |
| ATOM | 3407 | H1 | HOH A | 2 | 7.037  | 26.851 | 36.215 | H |
| ATOM | 3408 | H2 | HOH A | 3 | 5.451  | 26.862 | 36.196 | H |
| ATOM | 3409 | O  | HOH A | 1 | 6.261  | 27.385 | 58.656 | O |
| ATOM | 3410 | H1 | HOH A | 2 | 7.057  | 26.919 | 58.326 | H |
| ATOM | 3411 | H2 | HOH A | 3 | 5.472  | 26.920 | 58.307 | H |
| ATOM | 3412 | O  | HOH A | 1 | 28.857 | 27.438 | 14.414 | O |
| ATOM | 3413 | H1 | HOH A | 2 | 29.656 | 26.976 | 14.085 | H |
| ATOM | 3414 | H2 | HOH A | 3 | 28.071 | 26.967 | 14.067 | H |
| ATOM | 3415 | O  | HOH A | 1 | 28.874 | 27.303 | 36.526 | O |
| ATOM | 3416 | H1 | HOH A | 2 | 29.672 | 26.837 | 36.198 | H |
| ATOM | 3417 | H2 | HOH A | 3 | 28.086 | 26.836 | 36.177 | H |
| ATOM | 3418 | O  | HOH A | 1 | 28.871 | 27.476 | 58.614 | O |
| ATOM | 3419 | H1 | HOH A | 2 | 29.666 | 27.004 | 58.291 | H |
| ATOM | 3420 | H2 | HOH A | 3 | 28.081 | 27.008 | 58.271 | H |
| ATOM | 3421 | O  | HOH A | 1 | 51.472 | 27.403 | 14.318 | O |
| ATOM | 3422 | H1 | HOH A | 2 | 52.263 | 26.926 | 13.991 | H |

|      |      |    |       |   |        |        |        |   |
|------|------|----|-------|---|--------|--------|--------|---|
| ATOM | 3423 | H2 | HOH A | 3 | 50.677 | 26.945 | 13.975 | H |
| ATOM | 3424 | O  | HOH A | 1 | 51.492 | 27.315 | 36.468 | O |
| ATOM | 3425 | H1 | HOH A | 2 | 52.288 | 26.841 | 36.148 | H |
| ATOM | 3426 | H2 | HOH A | 3 | 50.702 | 26.850 | 36.120 | H |
| ATOM | 3427 | O  | HOH A | 1 | 51.467 | 27.485 | 58.612 | O |
| ATOM | 3428 | H1 | HOH A | 2 | 52.260 | 27.011 | 58.287 | H |
| ATOM | 3429 | H2 | HOH A | 3 | 50.675 | 27.019 | 58.273 | H |
| ATOM | 3430 | O  | HOH A | 1 | 10.755 | 27.314 | 14.392 | O |
| ATOM | 3431 | H1 | HOH A | 2 | 11.557 | 26.857 | 14.061 | H |
| ATOM | 3432 | H2 | HOH A | 3 | 10.774 | 28.236 | 14.060 | H |
| ATOM | 3433 | O  | HOH A | 1 | 10.724 | 27.351 | 36.545 | O |
| ATOM | 3434 | H1 | HOH A | 2 | 11.530 | 26.891 | 36.230 | H |
| ATOM | 3435 | H2 | HOH A | 3 | 10.745 | 28.268 | 36.200 | H |
| ATOM | 3436 | O  | HOH A | 1 | 10.746 | 27.401 | 58.652 | O |
| ATOM | 3437 | H1 | HOH A | 2 | 11.550 | 26.945 | 58.324 | H |
| ATOM | 3438 | H2 | HOH A | 3 | 10.763 | 28.322 | 58.319 | H |
| ATOM | 3439 | O  | HOH A | 1 | 33.346 | 27.493 | 14.397 | O |
| ATOM | 3440 | H1 | HOH A | 2 | 34.149 | 27.036 | 14.070 | H |
| ATOM | 3441 | H2 | HOH A | 3 | 33.365 | 28.414 | 14.064 | H |
| ATOM | 3442 | O  | HOH A | 1 | 33.380 | 27.328 | 36.520 | O |
| ATOM | 3443 | H1 | HOH A | 2 | 34.183 | 26.872 | 36.190 | H |
| ATOM | 3444 | H2 | HOH A | 3 | 33.392 | 28.247 | 36.180 | H |
| ATOM | 3445 | O  | HOH A | 1 | 33.355 | 27.518 | 58.617 | O |
| ATOM | 3446 | H1 | HOH A | 2 | 34.155 | 27.060 | 58.287 | H |
| ATOM | 3447 | H2 | HOH A | 3 | 33.368 | 28.437 | 58.275 | H |
| ATOM | 3448 | O  | HOH A | 1 | 55.957 | 27.396 | 14.326 | O |
| ATOM | 3449 | H1 | HOH A | 2 | 56.758 | 26.933 | 14.000 | H |
| ATOM | 3450 | H2 | HOH A | 3 | 55.981 | 28.316 | 13.989 | H |
| ATOM | 3451 | O  | HOH A | 1 | 55.963 | 27.341 | 36.466 | O |
| ATOM | 3452 | H1 | HOH A | 2 | 56.768 | 26.886 | 36.143 | H |
| ATOM | 3453 | H2 | HOH A | 3 | 55.978 | 28.260 | 36.127 | H |
| ATOM | 3454 | O  | HOH A | 1 | 55.952 | 27.473 | 58.618 | O |
| ATOM | 3455 | H1 | HOH A | 2 | 56.754 | 27.015 | 58.290 | H |
| ATOM | 3456 | H2 | HOH A | 3 | 55.967 | 28.392 | 58.276 | H |
| ATOM | 3457 | O  | HOH A | 1 | 15.279 | 27.306 | 14.370 | O |
| ATOM | 3458 | H1 | HOH A | 2 | 15.291 | 28.232 | 14.051 | H |

|      |      |    |       |   |        |        |        |   |
|------|------|----|-------|---|--------|--------|--------|---|
| ATOM | 3459 | H2 | HOH A | 3 | 15.296 | 27.322 | 15.350 | H |
| ATOM | 3460 | O  | HOH A | 1 | 15.264 | 27.310 | 36.508 | O |
| ATOM | 3461 | H1 | HOH A | 2 | 15.270 | 28.239 | 36.198 | H |
| ATOM | 3462 | H2 | HOH A | 3 | 15.266 | 27.317 | 37.488 | H |
| ATOM | 3463 | O  | HOH A | 1 | 15.284 | 27.377 | 58.593 | O |
| ATOM | 3464 | H1 | HOH A | 2 | 15.283 | 28.303 | 58.273 | H |
| ATOM | 3465 | H2 | HOH A | 3 | 15.290 | 27.395 | 59.573 | H |
| ATOM | 3466 | O  | HOH A | 1 | 37.891 | 27.480 | 14.332 | O |
| ATOM | 3467 | H1 | HOH A | 2 | 37.897 | 28.406 | 14.013 | H |
| ATOM | 3468 | H2 | HOH A | 3 | 37.897 | 27.496 | 15.312 | H |
| ATOM | 3469 | O  | HOH A | 1 | 37.922 | 27.291 | 36.466 | O |
| ATOM | 3470 | H1 | HOH A | 2 | 37.921 | 28.215 | 36.142 | H |
| ATOM | 3471 | H2 | HOH A | 3 | 37.925 | 27.313 | 37.446 | H |
| ATOM | 3472 | O  | HOH A | 1 | 37.890 | 27.507 | 58.566 | O |
| ATOM | 3473 | H1 | HOH A | 2 | 37.897 | 28.433 | 58.246 | H |
| ATOM | 3474 | H2 | HOH A | 3 | 37.893 | 27.526 | 59.546 | H |
| ATOM | 3475 | O  | HOH A | 1 | 60.480 | 27.342 | 14.281 | O |
| ATOM | 3476 | H1 | HOH A | 2 | 60.484 | 28.269 | 13.963 | H |
| ATOM | 3477 | H2 | HOH A | 3 | 60.493 | 27.358 | 15.261 | H |
| ATOM | 3478 | O  | HOH A | 1 | 60.486 | 27.327 | 36.460 | O |
| ATOM | 3479 | H1 | HOH A | 2 | 60.492 | 28.254 | 36.142 | H |
| ATOM | 3480 | H2 | HOH A | 3 | 60.496 | 27.343 | 37.440 | H |
| ATOM | 3481 | O  | HOH A | 1 | 60.494 | 27.414 | 58.581 | O |
| ATOM | 3482 | H1 | HOH A | 2 | 60.501 | 28.342 | 58.265 | H |
| ATOM | 3483 | H2 | HOH A | 3 | 60.494 | 27.428 | 59.561 | H |
| ATOM | 3484 | O  | HOH A | 1 | 19.813 | 27.349 | 14.424 | O |
| ATOM | 3485 | H1 | HOH A | 2 | 20.625 | 26.919 | 14.085 | H |
| ATOM | 3486 | H2 | HOH A | 3 | 19.803 | 28.274 | 14.100 | H |
| ATOM | 3487 | O  | HOH A | 1 | 19.805 | 27.293 | 36.574 | O |
| ATOM | 3488 | H1 | HOH A | 2 | 20.614 | 26.859 | 36.232 | H |
| ATOM | 3489 | H2 | HOH A | 3 | 19.794 | 28.215 | 36.244 | H |
| ATOM | 3490 | O  | HOH A | 1 | 19.820 | 27.395 | 58.652 | O |
| ATOM | 3491 | H1 | HOH A | 2 | 20.630 | 26.963 | 58.306 | H |
| ATOM | 3492 | H2 | HOH A | 3 | 19.810 | 28.321 | 58.331 | H |
| ATOM | 3493 | O  | HOH A | 1 | 42.435 | 27.461 | 14.375 | O |
| ATOM | 3494 | H1 | HOH A | 2 | 43.236 | 27.024 | 14.017 | H |

|      |      |    |       |   |        |        |        |   |
|------|------|----|-------|---|--------|--------|--------|---|
| ATOM | 3495 | H2 | HOH A | 3 | 42.428 | 28.387 | 14.055 | H |
| ATOM | 3496 | O  | HOH A | 1 | 42.462 | 27.274 | 36.493 | O |
| ATOM | 3497 | H1 | HOH A | 2 | 43.266 | 26.833 | 36.147 | H |
| ATOM | 3498 | H2 | HOH A | 3 | 42.458 | 28.197 | 36.163 | H |
| ATOM | 3499 | O  | HOH A | 1 | 42.419 | 27.498 | 58.601 | O |
| ATOM | 3500 | H1 | HOH A | 2 | 43.223 | 27.056 | 58.256 | H |
| ATOM | 3501 | H2 | HOH A | 3 | 42.420 | 28.423 | 58.276 | H |
| ATOM | 3502 | O  | HOH A | 1 | 65.020 | 27.301 | 14.369 | O |
| ATOM | 3503 | H1 | HOH A | 2 | 65.828 | 26.866 | 14.023 | H |
| ATOM | 3504 | H2 | HOH A | 3 | 65.015 | 28.228 | 14.050 | H |
| ATOM | 3505 | O  | HOH A | 1 | 65.017 | 27.312 | 36.534 | O |
| ATOM | 3506 | H1 | HOH A | 2 | 65.826 | 26.875 | 36.196 | H |
| ATOM | 3507 | H2 | HOH A | 3 | 65.010 | 28.234 | 36.203 | H |
| ATOM | 3508 | O  | HOH A | 1 | 65.012 | 27.393 | 58.656 | O |
| ATOM | 3509 | H1 | HOH A | 2 | 65.827 | 26.968 | 58.314 | H |
| ATOM | 3510 | H2 | HOH A | 3 | 64.995 | 28.318 | 58.334 | H |
| ATOM | 3511 | O  | HOH A | 1 | 22.068 | 31.321 | 14.379 | O |
| ATOM | 3512 | H1 | HOH A | 2 | 22.874 | 30.865 | 14.060 | H |
| ATOM | 3513 | H2 | HOH A | 3 | 22.089 | 31.323 | 15.359 | H |
| ATOM | 3514 | O  | HOH A | 1 | 22.050 | 31.250 | 36.488 | O |
| ATOM | 3515 | H1 | HOH A | 2 | 22.856 | 30.786 | 36.179 | H |
| ATOM | 3516 | H2 | HOH A | 3 | 22.062 | 31.257 | 37.468 | H |
| ATOM | 3517 | O  | HOH A | 1 | 22.072 | 31.375 | 58.589 | O |
| ATOM | 3518 | H1 | HOH A | 2 | 22.881 | 30.917 | 58.278 | H |
| ATOM | 3519 | H2 | HOH A | 3 | 22.087 | 31.384 | 59.569 | H |
| ATOM | 3520 | O  | HOH A | 1 | 44.668 | 31.396 | 14.285 | O |
| ATOM | 3521 | H1 | HOH A | 2 | 45.470 | 30.932 | 13.967 | H |
| ATOM | 3522 | H2 | HOH A | 3 | 44.687 | 31.397 | 15.265 | H |
| ATOM | 3523 | O  | HOH A | 1 | 44.709 | 31.241 | 36.409 | O |
| ATOM | 3524 | H1 | HOH A | 2 | 45.510 | 30.772 | 36.096 | H |
| ATOM | 3525 | H2 | HOH A | 3 | 44.728 | 31.251 | 37.389 | H |
| ATOM | 3526 | O  | HOH A | 1 | 44.675 | 31.445 | 58.532 | O |
| ATOM | 3527 | H1 | HOH A | 2 | 45.478 | 30.974 | 58.226 | H |
| ATOM | 3528 | H2 | HOH A | 3 | 44.685 | 31.456 | 59.512 | H |
| ATOM | 3529 | O  | HOH A | 1 | 67.280 | 31.240 | 14.312 | O |
| ATOM | 3530 | H1 | HOH A | 2 | 68.081 | 30.769 | 14.000 | H |

|      |      |    |       |   |        |        |        |   |
|------|------|----|-------|---|--------|--------|--------|---|
| ATOM | 3531 | H2 | HOH A | 3 | 67.293 | 31.242 | 15.292 | H |
| ATOM | 3532 | O  | HOH A | 1 | 67.250 | 31.266 | 36.455 | O |
| ATOM | 3533 | H1 | HOH A | 2 | 68.054 | 30.801 | 36.141 | H |
| ATOM | 3534 | H2 | HOH A | 3 | 67.270 | 31.276 | 37.435 | H |
| ATOM | 3535 | O  | HOH A | 1 | 67.256 | 31.328 | 58.582 | O |
| ATOM | 3536 | H1 | HOH A | 2 | 68.056 | 30.856 | 58.270 | H |
| ATOM | 3537 | H2 | HOH A | 3 | 67.269 | 31.331 | 59.562 | H |
| ATOM | 3538 | O  | HOH A | 1 | 4.019  | 31.215 | 14.364 | O |
| ATOM | 3539 | H1 | HOH A | 2 | 3.214  | 30.760 | 14.040 | H |
| ATOM | 3540 | H2 | HOH A | 3 | 4.002  | 31.199 | 15.344 | H |
| ATOM | 3541 | O  | HOH A | 1 | 3.990  | 31.250 | 36.503 | O |
| ATOM | 3542 | H1 | HOH A | 2 | 3.186  | 30.796 | 36.173 | H |
| ATOM | 3543 | H2 | HOH A | 3 | 3.964  | 31.238 | 37.482 | H |
| ATOM | 3544 | O  | HOH A | 1 | 4.000  | 31.308 | 58.625 | O |
| ATOM | 3545 | H1 | HOH A | 2 | 3.201  | 30.848 | 58.295 | H |
| ATOM | 3546 | H2 | HOH A | 3 | 3.976  | 31.294 | 59.604 | H |
| ATOM | 3547 | O  | HOH A | 1 | 26.600 | 31.342 | 14.392 | O |
| ATOM | 3548 | H1 | HOH A | 2 | 25.801 | 30.875 | 14.070 | H |
| ATOM | 3549 | H2 | HOH A | 3 | 26.587 | 31.324 | 15.372 | H |
| ATOM | 3550 | O  | HOH A | 1 | 26.600 | 31.234 | 36.524 | O |
| ATOM | 3551 | H1 | HOH A | 2 | 25.795 | 30.780 | 36.200 | H |
| ATOM | 3552 | H2 | HOH A | 3 | 26.580 | 31.225 | 37.504 | H |
| ATOM | 3553 | O  | HOH A | 1 | 26.604 | 31.383 | 58.608 | O |
| ATOM | 3554 | H1 | HOH A | 2 | 25.807 | 30.916 | 58.282 | H |
| ATOM | 3555 | H2 | HOH A | 3 | 26.580 | 31.377 | 59.587 | H |
| ATOM | 3556 | O  | HOH A | 1 | 49.227 | 31.354 | 14.293 | O |
| ATOM | 3557 | H1 | HOH A | 2 | 48.417 | 30.906 | 13.971 | H |
| ATOM | 3558 | H2 | HOH A | 3 | 49.211 | 31.343 | 15.272 | H |
| ATOM | 3559 | O  | HOH A | 1 | 49.231 | 31.242 | 36.445 | O |
| ATOM | 3560 | H1 | HOH A | 2 | 48.428 | 30.782 | 36.121 | H |
| ATOM | 3561 | H2 | HOH A | 3 | 49.212 | 31.230 | 37.425 | H |
| ATOM | 3562 | O  | HOH A | 1 | 49.206 | 31.417 | 58.564 | O |
| ATOM | 3563 | H1 | HOH A | 2 | 48.401 | 30.957 | 58.245 | H |
| ATOM | 3564 | H2 | HOH A | 3 | 49.189 | 31.412 | 59.544 | H |
| ATOM | 3565 | O  | HOH A | 1 | 8.525  | 31.223 | 14.408 | O |
| ATOM | 3566 | H1 | HOH A | 2 | 7.721  | 30.756 | 14.100 | H |

|      |      |    |       |   |        |        |        |   |
|------|------|----|-------|---|--------|--------|--------|---|
| ATOM | 3567 | H2 | HOH A | 3 | 8.508  | 31.241 | 15.388 | H |
| ATOM | 3568 | O  | HOH A | 1 | 8.484  | 31.270 | 36.550 | O |
| ATOM | 3569 | H1 | HOH A | 2 | 7.682  | 30.802 | 36.239 | H |
| ATOM | 3570 | H2 | HOH A | 3 | 8.466  | 31.286 | 37.529 | H |
| ATOM | 3571 | O  | HOH A | 1 | 8.502  | 31.321 | 58.658 | O |
| ATOM | 3572 | H1 | HOH A | 2 | 7.696  | 30.854 | 58.354 | H |
| ATOM | 3573 | H2 | HOH A | 3 | 8.487  | 31.344 | 59.637 | H |
| ATOM | 3574 | O  | HOH A | 1 | 31.111 | 31.384 | 14.398 | O |
| ATOM | 3575 | H1 | HOH A | 2 | 30.304 | 30.926 | 14.082 | H |
| ATOM | 3576 | H2 | HOH A | 3 | 31.091 | 31.393 | 15.377 | H |
| ATOM | 3577 | O  | HOH A | 1 | 31.123 | 31.237 | 36.533 | O |
| ATOM | 3578 | H1 | HOH A | 2 | 30.316 | 30.771 | 36.227 | H |
| ATOM | 3579 | H2 | HOH A | 3 | 31.106 | 31.260 | 37.512 | H |
| ATOM | 3580 | O  | HOH A | 1 | 31.125 | 31.424 | 58.617 | O |
| ATOM | 3581 | H1 | HOH A | 2 | 30.319 | 30.957 | 58.313 | H |
| ATOM | 3582 | H2 | HOH A | 3 | 31.108 | 31.452 | 59.596 | H |
| ATOM | 3583 | O  | HOH A | 1 | 53.728 | 31.332 | 14.340 | O |
| ATOM | 3584 | H1 | HOH A | 2 | 52.921 | 30.870 | 14.031 | H |
| ATOM | 3585 | H2 | HOH A | 3 | 53.711 | 31.348 | 15.320 | H |
| ATOM | 3586 | O  | HOH A | 1 | 53.736 | 31.262 | 36.487 | O |
| ATOM | 3587 | H1 | HOH A | 2 | 52.932 | 30.791 | 36.183 | H |
| ATOM | 3588 | H2 | HOH A | 3 | 53.726 | 31.278 | 37.467 | H |
| ATOM | 3589 | O  | HOH A | 1 | 53.717 | 31.407 | 58.590 | O |
| ATOM | 3590 | H1 | HOH A | 2 | 52.907 | 30.947 | 58.288 | H |
| ATOM | 3591 | H2 | HOH A | 3 | 53.705 | 31.430 | 59.570 | H |
| ATOM | 3592 | O  | HOH A | 1 | 13.034 | 31.236 | 14.383 | O |
| ATOM | 3593 | H1 | HOH A | 2 | 12.228 | 30.779 | 14.064 | H |
| ATOM | 3594 | H2 | HOH A | 3 | 13.012 | 31.243 | 15.362 | H |
| ATOM | 3595 | O  | HOH A | 1 | 13.003 | 31.267 | 36.523 | O |
| ATOM | 3596 | H1 | HOH A | 2 | 12.199 | 30.805 | 36.207 | H |
| ATOM | 3597 | H2 | HOH A | 3 | 12.987 | 31.266 | 37.503 | H |
| ATOM | 3598 | O  | HOH A | 1 | 13.031 | 31.310 | 58.626 | O |
| ATOM | 3599 | H1 | HOH A | 2 | 12.225 | 30.851 | 58.310 | H |
| ATOM | 3600 | H2 | HOH A | 3 | 13.019 | 31.305 | 59.606 | H |
| ATOM | 3601 | O  | HOH A | 1 | 35.625 | 31.417 | 14.370 | O |
| ATOM | 3602 | H1 | HOH A | 2 | 34.826 | 30.955 | 14.040 | H |



|      |      |    |       |   |        |        |        |   |
|------|------|----|-------|---|--------|--------|--------|---|
| ATOM | 3603 | H2 | HOH A | 3 | 35.602 | 31.403 | 15.349 | H |
| ATOM | 3604 | O  | HOH A | 1 | 35.656 | 31.243 | 36.474 | O |
| ATOM | 3605 | H1 | HOH A | 2 | 34.850 | 30.779 | 36.164 | H |
| ATOM | 3606 | H2 | HOH A | 3 | 35.646 | 31.244 | 37.454 | H |
| ATOM | 3607 | O  | HOH A | 1 | 35.637 | 31.452 | 58.571 | O |
| ATOM | 3608 | H1 | HOH A | 2 | 34.835 | 30.987 | 58.253 | H |
| ATOM | 3609 | H2 | HOH A | 3 | 35.620 | 31.450 | 59.551 | H |
| ATOM | 3610 | O  | HOH A | 1 | 58.234 | 31.299 | 14.304 | O |
| ATOM | 3611 | H1 | HOH A | 2 | 57.430 | 30.837 | 13.988 | H |
| ATOM | 3612 | H2 | HOH A | 3 | 58.222 | 31.295 | 15.284 | H |
| ATOM | 3613 | O  | HOH A | 1 | 58.236 | 31.265 | 36.459 | O |
| ATOM | 3614 | H1 | HOH A | 2 | 57.434 | 30.802 | 36.137 | H |
| ATOM | 3615 | H2 | HOH A | 3 | 58.213 | 31.265 | 37.439 | H |
| ATOM | 3616 | O  | HOH A | 1 | 58.232 | 31.387 | 58.592 | O |
| ATOM | 3617 | H1 | HOH A | 2 | 57.429 | 30.928 | 58.269 | H |
| ATOM | 3618 | H2 | HOH A | 3 | 58.212 | 31.378 | 59.572 | H |
| ATOM | 3619 | O  | HOH A | 1 | 17.547 | 31.252 | 14.396 | O |
| ATOM | 3620 | H1 | HOH A | 2 | 17.556 | 32.174 | 14.062 | H |
| ATOM | 3621 | H2 | HOH A | 3 | 17.550 | 31.285 | 15.375 | H |
| ATOM | 3622 | O  | HOH A | 1 | 17.528 | 31.232 | 36.539 | O |
| ATOM | 3623 | H1 | HOH A | 2 | 17.528 | 32.155 | 36.209 | H |
| ATOM | 3624 | H2 | HOH A | 3 | 17.529 | 31.261 | 37.519 | H |
| ATOM | 3625 | O  | HOH A | 1 | 17.550 | 31.307 | 58.620 | O |
| ATOM | 3626 | H1 | HOH A | 2 | 17.553 | 32.229 | 58.287 | H |
| ATOM | 3627 | H2 | HOH A | 3 | 17.551 | 31.339 | 59.599 | H |
| ATOM | 3628 | O  | HOH A | 1 | 40.146 | 31.400 | 14.344 | O |
| ATOM | 3629 | H1 | HOH A | 2 | 40.137 | 32.325 | 14.020 | H |
| ATOM | 3630 | H2 | HOH A | 3 | 40.152 | 31.423 | 15.324 | H |
| ATOM | 3631 | O  | HOH A | 1 | 40.182 | 31.199 | 36.471 | O |
| ATOM | 3632 | H1 | HOH A | 2 | 40.184 | 32.122 | 36.141 | H |
| ATOM | 3633 | H2 | HOH A | 3 | 40.190 | 31.227 | 37.451 | H |
| ATOM | 3634 | O  | HOH A | 1 | 40.155 | 31.427 | 58.581 | O |
| ATOM | 3635 | H1 | HOH A | 2 | 40.150 | 32.346 | 58.241 | H |
| ATOM | 3636 | H2 | HOH A | 3 | 40.156 | 31.466 | 59.561 | H |
| ATOM | 3637 | O  | HOH A | 1 | 62.754 | 31.227 | 14.322 | O |
| ATOM | 3638 | H1 | HOH A | 2 | 62.752 | 32.149 | 13.991 | H |

|      |      |    |       |   |        |        |        |   |
|------|------|----|-------|---|--------|--------|--------|---|
| ATOM | 3639 | H2 | HOH A | 3 | 62.748 | 31.257 | 15.302 | H |
| ATOM | 3640 | O  | HOH A | 1 | 62.741 | 31.233 | 36.472 | O |
| ATOM | 3641 | H1 | HOH A | 2 | 62.735 | 32.155 | 36.139 | H |
| ATOM | 3642 | H2 | HOH A | 3 | 62.741 | 31.265 | 37.451 | H |
| ATOM | 3643 | O  | HOH A | 1 | 62.734 | 31.330 | 58.611 | O |
| ATOM | 3644 | H1 | HOH A | 2 | 62.727 | 32.253 | 58.283 | H |
| ATOM | 3645 | H2 | HOH A | 3 | 62.734 | 31.357 | 59.591 | H |
| ATOM | 3646 | O  | HOH A | 1 | 1.732  | 35.145 | 14.329 | O |
| ATOM | 3647 | H1 | HOH A | 2 | 2.529  | 34.680 | 13.998 | H |
| ATOM | 3648 | H2 | HOH A | 3 | 1.759  | 36.066 | 13.996 | H |
| ATOM | 3649 | O  | HOH A | 1 | 1.699  | 35.169 | 36.491 | O |
| ATOM | 3650 | H1 | HOH A | 2 | 2.494  | 34.699 | 36.165 | H |
| ATOM | 3651 | H2 | HOH A | 3 | 1.731  | 36.089 | 36.156 | H |
| ATOM | 3652 | O  | HOH A | 1 | 1.704  | 35.237 | 58.610 | O |
| ATOM | 3653 | H1 | HOH A | 2 | 2.505  | 34.773 | 58.289 | H |
| ATOM | 3654 | H2 | HOH A | 3 | 1.735  | 36.159 | 58.279 | H |
| ATOM | 3655 | O  | HOH A | 1 | 24.314 | 35.253 | 14.399 | O |
| ATOM | 3656 | H1 | HOH A | 2 | 25.116 | 34.793 | 14.075 | H |
| ATOM | 3657 | H2 | HOH A | 3 | 24.335 | 36.173 | 14.063 | H |
| ATOM | 3658 | O  | HOH A | 1 | 24.304 | 35.153 | 36.505 | O |
| ATOM | 3659 | H1 | HOH A | 2 | 25.102 | 34.687 | 36.179 | H |
| ATOM | 3660 | H2 | HOH A | 3 | 24.333 | 36.074 | 36.172 | H |
| ATOM | 3661 | O  | HOH A | 1 | 24.319 | 35.296 | 58.619 | O |
| ATOM | 3662 | H1 | HOH A | 2 | 25.117 | 34.833 | 58.289 | H |
| ATOM | 3663 | H2 | HOH A | 3 | 24.343 | 36.217 | 58.282 | H |
| ATOM | 3664 | O  | HOH A | 1 | 46.920 | 35.305 | 14.310 | O |
| ATOM | 3665 | H1 | HOH A | 2 | 47.713 | 34.836 | 13.975 | H |
| ATOM | 3666 | H2 | HOH A | 3 | 46.949 | 36.226 | 13.975 | H |
| ATOM | 3667 | O  | HOH A | 1 | 46.944 | 35.165 | 36.429 | O |
| ATOM | 3668 | H1 | HOH A | 2 | 47.740 | 34.700 | 36.096 | H |
| ATOM | 3669 | H2 | HOH A | 3 | 46.968 | 36.085 | 36.093 | H |
| ATOM | 3670 | O  | HOH A | 1 | 46.909 | 35.350 | 58.560 | O |
| ATOM | 3671 | H1 | HOH A | 2 | 47.706 | 34.886 | 58.228 | H |
| ATOM | 3672 | H2 | HOH A | 3 | 46.932 | 36.270 | 58.223 | H |
| ATOM | 3673 | O  | HOH A | 1 | 6.274  | 35.119 | 14.333 | O |
| ATOM | 3674 | H1 | HOH A | 2 | 5.468  | 34.665 | 14.009 | H |

|      |      |    |       |   |        |        |        |   |
|------|------|----|-------|---|--------|--------|--------|---|
| ATOM | 3675 | H2 | HOH A | 3 | 6.256  | 36.041 | 14.003 | H |
| ATOM | 3676 | O  | HOH A | 1 | 6.233  | 35.166 | 36.481 | O |
| ATOM | 3677 | H1 | HOH A | 2 | 5.425  | 34.716 | 36.159 | H |
| ATOM | 3678 | H2 | HOH A | 3 | 6.218  | 36.089 | 36.151 | H |
| ATOM | 3679 | O  | HOH A | 1 | 6.248  | 35.210 | 58.593 | O |
| ATOM | 3680 | H1 | HOH A | 2 | 5.438  | 34.762 | 58.271 | H |
| ATOM | 3681 | H2 | HOH A | 3 | 6.233  | 36.134 | 58.266 | H |
| ATOM | 3682 | O  | HOH A | 1 | 28.836 | 35.261 | 14.354 | O |
| ATOM | 3683 | H1 | HOH A | 2 | 28.030 | 34.808 | 14.029 | H |
| ATOM | 3684 | H2 | HOH A | 3 | 28.818 | 36.183 | 14.025 | H |
| ATOM | 3685 | O  | HOH A | 1 | 28.874 | 35.127 | 36.468 | O |
| ATOM | 3686 | H1 | HOH A | 2 | 28.059 | 34.679 | 36.161 | H |
| ATOM | 3687 | H2 | HOH A | 3 | 28.858 | 36.048 | 36.134 | H |
| ATOM | 3688 | O  | HOH A | 1 | 28.853 | 35.298 | 58.567 | O |
| ATOM | 3689 | H1 | HOH A | 2 | 28.042 | 34.848 | 58.249 | H |
| ATOM | 3690 | H2 | HOH A | 3 | 28.838 | 36.220 | 58.234 | H |
| ATOM | 3691 | O  | HOH A | 1 | 51.476 | 35.242 | 14.261 | O |
| ATOM | 3692 | H1 | HOH A | 2 | 50.661 | 34.799 | 13.947 | H |
| ATOM | 3693 | H2 | HOH A | 3 | 51.466 | 36.165 | 13.931 | H |
| ATOM | 3694 | O  | HOH A | 1 | 51.482 | 35.152 | 36.401 | O |
| ATOM | 3695 | H1 | HOH A | 2 | 50.669 | 34.703 | 36.087 | H |
| ATOM | 3696 | H2 | HOH A | 3 | 51.465 | 36.075 | 36.073 | H |
| ATOM | 3697 | O  | HOH A | 1 | 51.450 | 35.315 | 58.533 | O |
| ATOM | 3698 | H1 | HOH A | 2 | 50.642 | 34.866 | 58.210 | H |
| ATOM | 3699 | H2 | HOH A | 3 | 51.438 | 36.237 | 58.201 | H |
| ATOM | 3700 | O  | HOH A | 1 | 10.769 | 35.152 | 14.389 | O |
| ATOM | 3701 | H1 | HOH A | 2 | 9.965  | 34.684 | 14.082 | H |
| ATOM | 3702 | H2 | HOH A | 3 | 10.769 | 35.145 | 15.369 | H |
| ATOM | 3703 | O  | HOH A | 1 | 10.713 | 35.196 | 36.519 | O |
| ATOM | 3704 | H1 | HOH A | 2 | 9.910  | 34.726 | 36.213 | H |
| ATOM | 3705 | H2 | HOH A | 3 | 10.716 | 35.183 | 37.499 | H |
| ATOM | 3706 | O  | HOH A | 1 | 10.750 | 35.232 | 58.619 | O |
| ATOM | 3707 | H1 | HOH A | 2 | 9.949  | 34.758 | 58.312 | H |
| ATOM | 3708 | H2 | HOH A | 3 | 10.750 | 35.223 | 59.599 | H |
| ATOM | 3709 | O  | HOH A | 1 | 33.335 | 35.343 | 14.367 | O |
| ATOM | 3710 | H1 | HOH A | 2 | 32.541 | 34.861 | 14.054 | H |

|      |      |    |       |   |        |        |        |   |
|------|------|----|-------|---|--------|--------|--------|---|
| ATOM | 3711 | H2 | HOH A | 3 | 33.335 | 35.321 | 15.347 | H |
| ATOM | 3712 | O  | HOH A | 1 | 33.379 | 35.167 | 36.474 | O |
| ATOM | 3713 | H1 | HOH A | 2 | 32.580 | 34.692 | 36.163 | H |
| ATOM | 3714 | H2 | HOH A | 3 | 33.375 | 35.157 | 37.454 | H |
| ATOM | 3715 | O  | HOH A | 1 | 33.350 | 35.363 | 58.599 | O |
| ATOM | 3716 | H1 | HOH A | 2 | 32.549 | 34.889 | 58.292 | H |
| ATOM | 3717 | H2 | HOH A | 3 | 33.344 | 35.365 | 59.579 | H |
| ATOM | 3718 | O  | HOH A | 1 | 55.972 | 35.251 | 14.308 | O |
| ATOM | 3719 | H1 | HOH A | 2 | 55.170 | 34.782 | 13.995 | H |
| ATOM | 3720 | H2 | HOH A | 3 | 55.970 | 35.234 | 15.287 | H |
| ATOM | 3721 | O  | HOH A | 1 | 55.966 | 35.197 | 36.456 | O |
| ATOM | 3722 | H1 | HOH A | 2 | 55.164 | 34.725 | 36.147 | H |
| ATOM | 3723 | H2 | HOH A | 3 | 55.963 | 35.188 | 37.435 | H |
| ATOM | 3724 | O  | HOH A | 1 | 55.949 | 35.322 | 58.583 | O |
| ATOM | 3725 | H1 | HOH A | 2 | 55.146 | 34.851 | 58.277 | H |
| ATOM | 3726 | H2 | HOH A | 3 | 55.948 | 35.316 | 59.563 | H |
| ATOM | 3727 | O  | HOH A | 1 | 15.281 | 35.135 | 14.404 | O |
| ATOM | 3728 | H1 | HOH A | 2 | 14.476 | 34.687 | 14.070 | H |
| ATOM | 3729 | H2 | HOH A | 3 | 15.271 | 36.059 | 14.078 | H |
| ATOM | 3730 | O  | HOH A | 1 | 15.256 | 35.138 | 36.538 | O |
| ATOM | 3731 | H1 | HOH A | 2 | 14.445 | 34.697 | 36.210 | H |
| ATOM | 3732 | H2 | HOH A | 3 | 15.248 | 36.064 | 36.215 | H |
| ATOM | 3733 | O  | HOH A | 1 | 15.281 | 35.205 | 58.617 | O |
| ATOM | 3734 | H1 | HOH A | 2 | 14.477 | 34.758 | 58.279 | H |
| ATOM | 3735 | H2 | HOH A | 3 | 15.273 | 36.130 | 58.292 | H |
| ATOM | 3736 | O  | HOH A | 1 | 37.867 | 35.308 | 14.344 | O |
| ATOM | 3737 | H1 | HOH A | 2 | 37.057 | 34.865 | 14.017 | H |
| ATOM | 3738 | H2 | HOH A | 3 | 37.858 | 36.233 | 14.020 | H |
| ATOM | 3739 | O  | HOH A | 1 | 37.912 | 35.111 | 36.467 | O |
| ATOM | 3740 | H1 | HOH A | 2 | 37.098 | 34.672 | 36.145 | H |
| ATOM | 3741 | H2 | HOH A | 3 | 37.907 | 36.035 | 36.140 | H |
| ATOM | 3742 | O  | HOH A | 1 | 37.888 | 35.325 | 58.576 | O |
| ATOM | 3743 | H1 | HOH A | 2 | 37.077 | 34.885 | 58.245 | H |
| ATOM | 3744 | H2 | HOH A | 3 | 37.882 | 36.251 | 58.255 | H |
| ATOM | 3745 | O  | HOH A | 1 | 60.496 | 35.153 | 14.322 | O |
| ATOM | 3746 | H1 | HOH A | 2 | 59.681 | 34.720 | 13.991 | H |

|      |      |    |       |   |        |        |        |   |
|------|------|----|-------|---|--------|--------|--------|---|
| ATOM | 3747 | H2 | HOH A | 3 | 60.497 | 36.080 | 14.004 | H |
| ATOM | 3748 | O  | HOH A | 1 | 60.479 | 35.130 | 36.473 | O |
| ATOM | 3749 | H1 | HOH A | 2 | 59.669 | 34.689 | 36.139 | H |
| ATOM | 3750 | H2 | HOH A | 3 | 60.475 | 36.055 | 36.151 | H |
| ATOM | 3751 | O  | HOH A | 1 | 60.481 | 35.245 | 58.593 | O |
| ATOM | 3752 | H1 | HOH A | 2 | 59.665 | 34.813 | 58.264 | H |
| ATOM | 3753 | H2 | HOH A | 3 | 60.483 | 36.171 | 58.272 | H |
| ATOM | 3754 | O  | HOH A | 1 | 19.791 | 35.219 | 14.396 | O |
| ATOM | 3755 | H1 | HOH A | 2 | 20.602 | 34.762 | 14.091 | H |
| ATOM | 3756 | H2 | HOH A | 3 | 19.798 | 35.228 | 15.376 | H |
| ATOM | 3757 | O  | HOH A | 1 | 19.764 | 35.174 | 36.495 | O |
| ATOM | 3758 | H1 | HOH A | 2 | 20.576 | 34.714 | 36.193 | H |
| ATOM | 3759 | H2 | HOH A | 3 | 19.765 | 35.178 | 37.475 | H |
| ATOM | 3760 | O  | HOH A | 1 | 19.799 | 35.263 | 58.590 | O |
| ATOM | 3761 | H1 | HOH A | 2 | 20.611 | 34.805 | 58.287 | H |
| ATOM | 3762 | H2 | HOH A | 3 | 19.804 | 35.274 | 59.570 | H |
| ATOM | 3763 | O  | HOH A | 1 | 42.383 | 35.322 | 14.299 | O |
| ATOM | 3764 | H1 | HOH A | 2 | 43.193 | 34.863 | 13.995 | H |
| ATOM | 3765 | H2 | HOH A | 3 | 42.386 | 35.325 | 15.279 | H |
| ATOM | 3766 | O  | HOH A | 1 | 42.428 | 35.148 | 36.419 | O |
| ATOM | 3767 | H1 | HOH A | 2 | 43.238 | 34.684 | 36.119 | H |
| ATOM | 3768 | H2 | HOH A | 3 | 42.431 | 35.157 | 37.399 | H |
| ATOM | 3769 | O  | HOH A | 1 | 42.394 | 35.363 | 58.533 | O |
| ATOM | 3770 | H1 | HOH A | 2 | 43.207 | 34.899 | 58.241 | H |
| ATOM | 3771 | H2 | HOH A | 3 | 42.391 | 35.381 | 59.513 | H |
| ATOM | 3772 | O  | HOH A | 1 | 64.994 | 35.155 | 14.294 | O |
| ATOM | 3773 | H1 | HOH A | 2 | 65.808 | 34.696 | 13.999 | H |
| ATOM | 3774 | H2 | HOH A | 3 | 64.990 | 35.165 | 15.274 | H |
| ATOM | 3775 | O  | HOH A | 1 | 64.961 | 35.177 | 36.449 | O |
| ATOM | 3776 | H1 | HOH A | 2 | 65.779 | 34.726 | 36.152 | H |
| ATOM | 3777 | H2 | HOH A | 3 | 64.961 | 35.189 | 37.429 | H |
| ATOM | 3778 | O  | HOH A | 1 | 64.973 | 35.254 | 58.590 | O |
| ATOM | 3779 | H1 | HOH A | 2 | 65.781 | 34.788 | 58.287 | H |
| ATOM | 3780 | H2 | HOH A | 3 | 64.978 | 35.263 | 59.570 | H |
| ATOM | 3781 | O  | HOH A | 1 | 22.038 | 39.161 | 14.377 | O |
| ATOM | 3782 | H1 | HOH A | 2 | 22.851 | 38.720 | 14.052 | H |

|      |      |    |       |   |        |        |        |   |
|------|------|----|-------|---|--------|--------|--------|---|
| ATOM | 3783 | H2 | HOH A | 3 | 22.044 | 40.085 | 14.052 | H |
| ATOM | 3784 | O  | HOH A | 1 | 22.038 | 39.074 | 36.502 | O |
| ATOM | 3785 | H1 | HOH A | 2 | 22.849 | 38.632 | 36.175 | H |
| ATOM | 3786 | H2 | HOH A | 3 | 22.042 | 39.997 | 36.174 | H |
| ATOM | 3787 | O  | HOH A | 1 | 22.057 | 39.194 | 58.598 | O |
| ATOM | 3788 | H1 | HOH A | 2 | 22.873 | 38.755 | 58.278 | H |
| ATOM | 3789 | H2 | HOH A | 3 | 22.065 | 40.119 | 58.276 | H |
| ATOM | 3790 | O  | HOH A | 1 | 44.642 | 39.222 | 14.309 | O |
| ATOM | 3791 | H1 | HOH A | 2 | 45.447 | 38.778 | 13.970 | H |
| ATOM | 3792 | H2 | HOH A | 3 | 44.649 | 40.148 | 13.990 | H |
| ATOM | 3793 | O  | HOH A | 1 | 44.688 | 39.067 | 36.414 | O |
| ATOM | 3794 | H1 | HOH A | 2 | 45.500 | 38.631 | 36.082 | H |
| ATOM | 3795 | H2 | HOH A | 3 | 44.689 | 39.993 | 36.093 | H |
| ATOM | 3796 | O  | HOH A | 1 | 44.658 | 39.277 | 58.536 | O |
| ATOM | 3797 | H1 | HOH A | 2 | 45.469 | 38.835 | 58.208 | H |
| ATOM | 3798 | H2 | HOH A | 3 | 44.663 | 40.201 | 58.210 | H |
| ATOM | 3799 | O  | HOH A | 1 | 67.269 | 39.068 | 14.325 | O |
| ATOM | 3800 | H1 | HOH A | 2 | 68.080 | 38.625 | 14.000 | H |
| ATOM | 3801 | H2 | HOH A | 3 | 67.276 | 39.991 | 13.995 | H |
| ATOM | 3802 | O  | HOH A | 1 | 67.241 | 39.085 | 36.472 | O |
| ATOM | 3803 | H1 | HOH A | 2 | 68.058 | 38.647 | 36.153 | H |
| ATOM | 3804 | H2 | HOH A | 3 | 67.249 | 40.011 | 36.152 | H |
| ATOM | 3805 | O  | HOH A | 1 | 67.241 | 39.151 | 58.621 | O |
| ATOM | 3806 | H1 | HOH A | 2 | 68.055 | 38.714 | 58.296 | H |
| ATOM | 3807 | H2 | HOH A | 3 | 67.242 | 40.075 | 58.295 | H |
| ATOM | 3808 | O  | HOH A | 1 | 4.002  | 39.038 | 14.376 | O |
| ATOM | 3809 | H1 | HOH A | 2 | 4.801  | 38.588 | 14.031 | H |
| ATOM | 3810 | H2 | HOH A | 3 | 4.017  | 39.966 | 14.060 | H |
| ATOM | 3811 | O  | HOH A | 1 | 3.969  | 39.083 | 36.521 | O |
| ATOM | 3812 | H1 | HOH A | 2 | 4.775  | 38.635 | 36.189 | H |
| ATOM | 3813 | H2 | HOH A | 3 | 3.985  | 40.009 | 36.203 | H |
| ATOM | 3814 | O  | HOH A | 1 | 3.975  | 39.121 | 58.636 | O |
| ATOM | 3815 | H1 | HOH A | 2 | 4.781  | 38.680 | 58.294 | H |
| ATOM | 3816 | H2 | HOH A | 3 | 3.979  | 40.048 | 58.317 | H |
| ATOM | 3817 | O  | HOH A | 1 | 26.569 | 39.172 | 14.399 | O |
| ATOM | 3818 | H1 | HOH A | 2 | 27.376 | 38.732 | 14.057 | H |

|      |      |    |       |   |        |        |        |   |
|------|------|----|-------|---|--------|--------|--------|---|
| ATOM | 3819 | H2 | HOH A | 3 | 26.574 | 40.100 | 14.084 | H |
| ATOM | 3820 | O  | HOH A | 1 | 26.597 | 39.043 | 36.520 | O |
| ATOM | 3821 | H1 | HOH A | 2 | 27.400 | 38.596 | 36.181 | H |
| ATOM | 3822 | H2 | HOH A | 3 | 26.606 | 39.968 | 36.198 | H |
| ATOM | 3823 | O  | HOH A | 1 | 26.604 | 39.199 | 58.624 | O |
| ATOM | 3824 | H1 | HOH A | 2 | 27.410 | 38.754 | 58.288 | H |
| ATOM | 3825 | H2 | HOH A | 3 | 26.612 | 40.124 | 58.302 | H |
| ATOM | 3826 | O  | HOH A | 1 | 49.185 | 39.175 | 14.314 | O |
| ATOM | 3827 | H1 | HOH A | 2 | 49.990 | 38.732 | 13.972 | H |
| ATOM | 3828 | H2 | HOH A | 3 | 49.194 | 40.103 | 14.001 | H |
| ATOM | 3829 | O  | HOH A | 1 | 49.226 | 39.053 | 36.450 | O |
| ATOM | 3830 | H1 | HOH A | 2 | 50.036 | 38.617 | 36.114 | H |
| ATOM | 3831 | H2 | HOH A | 3 | 49.227 | 39.980 | 36.132 | H |
| ATOM | 3832 | O  | HOH A | 1 | 49.198 | 39.240 | 58.563 | O |
| ATOM | 3833 | H1 | HOH A | 2 | 50.003 | 38.794 | 58.226 | H |
| ATOM | 3834 | H2 | HOH A | 3 | 49.211 | 40.168 | 58.247 | H |
| ATOM | 3835 | O  | HOH A | 1 | 8.510  | 39.058 | 14.379 | O |
| ATOM | 3836 | H1 | HOH A | 2 | 9.308  | 38.592 | 14.052 | H |
| ATOM | 3837 | H2 | HOH A | 3 | 8.532  | 39.047 | 15.358 | H |
| ATOM | 3838 | O  | HOH A | 1 | 8.467  | 39.110 | 36.513 | O |
| ATOM | 3839 | H1 | HOH A | 2 | 9.266  | 38.646 | 36.187 | H |
| ATOM | 3840 | H2 | HOH A | 3 | 8.486  | 39.093 | 37.493 | H |
| ATOM | 3841 | O  | HOH A | 1 | 8.499  | 39.144 | 58.634 | O |
| ATOM | 3842 | H1 | HOH A | 2 | 9.296  | 38.680 | 58.304 | H |
| ATOM | 3843 | H2 | HOH A | 3 | 8.526  | 39.132 | 59.614 | H |
| ATOM | 3844 | O  | HOH A | 1 | 31.082 | 39.228 | 14.377 | O |
| ATOM | 3845 | H1 | HOH A | 2 | 31.881 | 38.768 | 14.046 | H |
| ATOM | 3846 | H2 | HOH A | 3 | 31.104 | 39.206 | 15.357 | H |
| ATOM | 3847 | O  | HOH A | 1 | 31.114 | 39.072 | 36.495 | O |
| ATOM | 3848 | H1 | HOH A | 2 | 31.909 | 38.604 | 36.165 | H |
| ATOM | 3849 | H2 | HOH A | 3 | 31.137 | 39.055 | 37.475 | H |
| ATOM | 3850 | O  | HOH A | 1 | 31.118 | 39.257 | 58.586 | O |
| ATOM | 3851 | H1 | HOH A | 2 | 31.920 | 38.795 | 58.264 | H |
| ATOM | 3852 | H2 | HOH A | 3 | 31.137 | 39.250 | 59.566 | H |
| ATOM | 3853 | O  | HOH A | 1 | 53.706 | 39.175 | 14.304 | O |
| ATOM | 3854 | H1 | HOH A | 2 | 54.501 | 38.707 | 13.973 | H |

|      |      |    |       |   |        |        |        |   |
|------|------|----|-------|---|--------|--------|--------|---|
| ATOM | 3855 | H2 | HOH A | 3 | 53.730 | 39.157 | 15.283 | H |
| ATOM | 3856 | O  | HOH A | 1 | 53.731 | 39.107 | 36.438 | O |
| ATOM | 3857 | H1 | HOH A | 2 | 54.531 | 38.644 | 36.111 | H |
| ATOM | 3858 | H2 | HOH A | 3 | 53.753 | 39.093 | 37.417 | H |
| ATOM | 3859 | O  | HOH A | 1 | 53.702 | 39.242 | 58.583 | O |
| ATOM | 3860 | H1 | HOH A | 2 | 54.503 | 38.781 | 58.257 | H |
| ATOM | 3861 | H2 | HOH A | 3 | 53.725 | 39.232 | 59.563 | H |
| ATOM | 3862 | O  | HOH A | 1 | 13.040 | 39.062 | 14.383 | O |
| ATOM | 3863 | H1 | HOH A | 2 | 12.237 | 38.592 | 14.076 | H |
| ATOM | 3864 | H2 | HOH A | 3 | 13.036 | 39.059 | 15.363 | H |
| ATOM | 3865 | O  | HOH A | 1 | 13.022 | 39.080 | 36.530 | O |
| ATOM | 3866 | H1 | HOH A | 2 | 12.218 | 38.614 | 36.218 | H |
| ATOM | 3867 | H2 | HOH A | 3 | 13.019 | 39.068 | 37.510 | H |
| ATOM | 3868 | O  | HOH A | 1 | 13.042 | 39.145 | 58.609 | O |
| ATOM | 3869 | H1 | HOH A | 2 | 12.242 | 38.669 | 58.301 | H |
| ATOM | 3870 | H2 | HOH A | 3 | 13.043 | 39.132 | 59.588 | H |
| ATOM | 3871 | O  | HOH A | 1 | 35.629 | 39.239 | 14.356 | O |
| ATOM | 3872 | H1 | HOH A | 2 | 34.829 | 38.768 | 14.042 | H |
| ATOM | 3873 | H2 | HOH A | 3 | 35.628 | 39.218 | 15.336 | H |
| ATOM | 3874 | O  | HOH A | 1 | 35.679 | 39.055 | 36.455 | O |
| ATOM | 3875 | H1 | HOH A | 2 | 34.871 | 38.592 | 36.149 | H |
| ATOM | 3876 | H2 | HOH A | 3 | 35.683 | 39.042 | 37.435 | H |
| ATOM | 3877 | O  | HOH A | 1 | 35.659 | 39.262 | 58.567 | O |
| ATOM | 3878 | H1 | HOH A | 2 | 34.856 | 38.789 | 58.266 | H |
| ATOM | 3879 | H2 | HOH A | 3 | 35.658 | 39.268 | 59.547 | H |
| ATOM | 3880 | O  | HOH A | 1 | 58.260 | 39.113 | 14.292 | O |
| ATOM | 3881 | H1 | HOH A | 2 | 57.452 | 38.656 | 13.980 | H |
| ATOM | 3882 | H2 | HOH A | 3 | 58.257 | 39.100 | 15.272 | H |
| ATOM | 3883 | O  | HOH A | 1 | 58.263 | 39.100 | 36.441 | O |
| ATOM | 3884 | H1 | HOH A | 2 | 57.458 | 38.632 | 36.135 | H |
| ATOM | 3885 | H2 | HOH A | 3 | 58.263 | 39.092 | 37.421 | H |
| ATOM | 3886 | O  | HOH A | 1 | 58.250 | 39.206 | 58.575 | O |
| ATOM | 3887 | H1 | HOH A | 2 | 57.442 | 38.743 | 58.269 | H |
| ATOM | 3888 | H2 | HOH A | 3 | 58.252 | 39.195 | 59.555 | H |
| ATOM | 3889 | O  | HOH A | 1 | 17.539 | 39.078 | 14.388 | O |
| ATOM | 3890 | H1 | HOH A | 2 | 18.349 | 38.638 | 14.055 | H |



|      |      |    |       |   |        |        |        |   |
|------|------|----|-------|---|--------|--------|--------|---|
| ATOM | 3891 | H2 | HOH A | 3 | 17.540 | 40.002 | 14.060 | H |
| ATOM | 3892 | O  | HOH A | 1 | 17.529 | 39.059 | 36.531 | O |
| ATOM | 3893 | H1 | HOH A | 2 | 18.336 | 38.620 | 36.190 | H |
| ATOM | 3894 | H2 | HOH A | 3 | 17.523 | 39.981 | 36.200 | H |
| ATOM | 3895 | O  | HOH A | 1 | 17.552 | 39.114 | 58.620 | O |
| ATOM | 3896 | H1 | HOH A | 2 | 18.363 | 38.680 | 58.282 | H |
| ATOM | 3897 | H2 | HOH A | 3 | 17.547 | 40.040 | 58.298 | H |
| ATOM | 3898 | O  | HOH A | 1 | 40.143 | 39.213 | 14.347 | O |
| ATOM | 3899 | H1 | HOH A | 2 | 40.949 | 38.777 | 14.001 | H |
| ATOM | 3900 | H2 | HOH A | 3 | 40.139 | 40.140 | 14.029 | H |
| ATOM | 3901 | O  | HOH A | 1 | 40.193 | 39.020 | 36.456 | O |
| ATOM | 3902 | H1 | HOH A | 2 | 41.001 | 38.582 | 36.116 | H |
| ATOM | 3903 | H2 | HOH A | 3 | 40.190 | 39.945 | 36.132 | H |
| ATOM | 3904 | O  | HOH A | 1 | 40.157 | 39.229 | 58.576 | O |
| ATOM | 3905 | H1 | HOH A | 2 | 40.970 | 38.792 | 58.245 | H |
| ATOM | 3906 | H2 | HOH A | 3 | 40.156 | 40.153 | 58.251 | H |
| ATOM | 3907 | O  | HOH A | 1 | 62.764 | 39.070 | 14.332 | O |
| ATOM | 3908 | H1 | HOH A | 2 | 63.575 | 38.634 | 13.997 | H |
| ATOM | 3909 | H2 | HOH A | 3 | 62.763 | 39.996 | 14.010 | H |
| ATOM | 3910 | O  | HOH A | 1 | 62.743 | 39.058 | 36.473 | O |
| ATOM | 3911 | H1 | HOH A | 2 | 63.554 | 38.620 | 36.139 | H |
| ATOM | 3912 | H2 | HOH A | 3 | 62.739 | 39.980 | 36.141 | H |
| ATOM | 3913 | O  | HOH A | 1 | 62.749 | 39.143 | 58.613 | O |
| ATOM | 3914 | H1 | HOH A | 2 | 63.556 | 38.703 | 58.273 | H |
| ATOM | 3915 | H2 | HOH A | 3 | 62.747 | 40.067 | 58.286 | H |
| ATOM | 3916 | O  | HOH A | 1 | 1.745  | 42.938 | 14.327 | O |
| ATOM | 3917 | H1 | HOH A | 2 | 0.922  | 42.502 | 14.021 | H |
| ATOM | 3918 | H2 | HOH A | 3 | 1.735  | 43.863 | 14.006 | H |
| ATOM | 3919 | O  | HOH A | 1 | 1.719  | 42.980 | 36.466 | O |
| ATOM | 3920 | H1 | HOH A | 2 | 0.904  | 42.545 | 36.141 | H |
| ATOM | 3921 | H2 | HOH A | 3 | 1.712  | 43.909 | 36.154 | H |
| ATOM | 3922 | O  | HOH A | 1 | 1.708  | 43.024 | 58.594 | O |
| ATOM | 3923 | H1 | HOH A | 2 | 0.888  | 42.589 | 58.280 | H |
| ATOM | 3924 | H2 | HOH A | 3 | 1.698  | 43.953 | 58.282 | H |
| ATOM | 3925 | O  | HOH A | 1 | 24.312 | 43.058 | 14.359 | O |
| ATOM | 3926 | H1 | HOH A | 2 | 23.494 | 42.618 | 14.046 | H |

|      |      |    |       |   |        |        |        |   |
|------|------|----|-------|---|--------|--------|--------|---|
| ATOM | 3927 | H2 | HOH A | 3 | 24.298 | 43.984 | 14.041 | H |
| ATOM | 3928 | O  | HOH A | 1 | 24.325 | 42.953 | 36.465 | O |
| ATOM | 3929 | H1 | HOH A | 2 | 23.505 | 42.516 | 36.157 | H |
| ATOM | 3930 | H2 | HOH A | 3 | 24.309 | 43.882 | 36.153 | H |
| ATOM | 3931 | O  | HOH A | 1 | 24.338 | 43.093 | 58.587 | O |
| ATOM | 3932 | H1 | HOH A | 2 | 23.513 | 42.664 | 58.278 | H |
| ATOM | 3933 | H2 | HOH A | 3 | 24.333 | 44.021 | 58.272 | H |
| ATOM | 3934 | O  | HOH A | 1 | 46.923 | 43.084 | 14.282 | O |
| ATOM | 3935 | H1 | HOH A | 2 | 46.101 | 42.644 | 13.980 | H |
| ATOM | 3936 | H2 | HOH A | 3 | 46.906 | 44.010 | 13.963 | H |
| ATOM | 3937 | O  | HOH A | 1 | 46.957 | 42.950 | 36.406 | O |
| ATOM | 3938 | H1 | HOH A | 2 | 46.131 | 42.518 | 36.102 | H |
| ATOM | 3939 | H2 | HOH A | 3 | 46.947 | 43.878 | 36.090 | H |
| ATOM | 3940 | O  | HOH A | 1 | 46.932 | 43.145 | 58.538 | O |
| ATOM | 3941 | H1 | HOH A | 2 | 46.107 | 42.714 | 58.232 | H |
| ATOM | 3942 | H2 | HOH A | 3 | 46.921 | 44.075 | 58.228 | H |
| ATOM | 3943 | O  | HOH A | 1 | 6.239  | 42.942 | 14.357 | O |
| ATOM | 3944 | H1 | HOH A | 2 | 7.052  | 42.497 | 14.041 | H |
| ATOM | 3945 | H2 | HOH A | 3 | 6.252  | 43.866 | 14.031 | H |
| ATOM | 3946 | O  | HOH A | 1 | 6.203  | 43.005 | 36.504 | O |
| ATOM | 3947 | H1 | HOH A | 2 | 7.019  | 42.561 | 36.193 | H |
| ATOM | 3948 | H2 | HOH A | 3 | 6.217  | 43.929 | 36.176 | H |
| ATOM | 3949 | O  | HOH A | 1 | 6.204  | 43.037 | 58.623 | O |
| ATOM | 3950 | H1 | HOH A | 2 | 7.018  | 42.591 | 58.308 | H |
| ATOM | 3951 | H2 | HOH A | 3 | 6.221  | 43.962 | 58.299 | H |
| ATOM | 3952 | O  | HOH A | 1 | 28.809 | 43.106 | 14.375 | O |
| ATOM | 3953 | H1 | HOH A | 2 | 29.624 | 42.661 | 14.060 | H |
| ATOM | 3954 | H2 | HOH A | 3 | 28.821 | 44.028 | 14.045 | H |
| ATOM | 3955 | O  | HOH A | 1 | 28.826 | 42.971 | 36.480 | O |
| ATOM | 3956 | H1 | HOH A | 2 | 29.643 | 42.530 | 36.166 | H |
| ATOM | 3957 | H2 | HOH A | 3 | 28.834 | 43.894 | 36.152 | H |
| ATOM | 3958 | O  | HOH A | 1 | 28.831 | 43.135 | 58.587 | O |
| ATOM | 3959 | H1 | HOH A | 2 | 29.646 | 42.691 | 58.272 | H |
| ATOM | 3960 | H2 | HOH A | 3 | 28.839 | 44.056 | 58.252 | H |
| ATOM | 3961 | O  | HOH A | 1 | 51.423 | 43.082 | 14.291 | O |
| ATOM | 3962 | H1 | HOH A | 2 | 52.235 | 42.635 | 13.972 | H |

|      |      |    |       |   |        |        |        |   |
|------|------|----|-------|---|--------|--------|--------|---|
| ATOM | 3963 | H2 | HOH A | 3 | 51.438 | 44.006 | 13.965 | H |
| ATOM | 3964 | O  | HOH A | 1 | 51.447 | 42.988 | 36.430 | O |
| ATOM | 3965 | H1 | HOH A | 2 | 52.264 | 42.546 | 36.117 | H |
| ATOM | 3966 | H2 | HOH A | 3 | 51.456 | 43.910 | 36.097 | H |
| ATOM | 3967 | O  | HOH A | 1 | 51.419 | 43.151 | 58.569 | O |
| ATOM | 3968 | H1 | HOH A | 2 | 52.233 | 42.705 | 58.258 | H |
| ATOM | 3969 | H2 | HOH A | 3 | 51.431 | 44.072 | 58.235 | H |
| ATOM | 3970 | O  | HOH A | 1 | 10.770 | 42.973 | 14.411 | O |
| ATOM | 3971 | H1 | HOH A | 2 | 11.570 | 42.509 | 14.086 | H |
| ATOM | 3972 | H2 | HOH A | 3 | 9.985  | 42.495 | 14.073 | H |
| ATOM | 3973 | O  | HOH A | 1 | 10.731 | 43.002 | 36.542 | O |
| ATOM | 3974 | H1 | HOH A | 2 | 11.529 | 42.533 | 36.220 | H |
| ATOM | 3975 | H2 | HOH A | 3 | 9.943  | 42.524 | 36.209 | H |
| ATOM | 3976 | O  | HOH A | 1 | 10.753 | 43.053 | 58.650 | O |
| ATOM | 3977 | H1 | HOH A | 2 | 11.547 | 42.582 | 58.321 | H |
| ATOM | 3978 | H2 | HOH A | 3 | 9.961  | 42.578 | 58.323 | H |
| ATOM | 3979 | O  | HOH A | 1 | 33.342 | 43.150 | 14.397 | O |
| ATOM | 3980 | H1 | HOH A | 2 | 34.139 | 42.685 | 14.067 | H |
| ATOM | 3981 | H2 | HOH A | 3 | 32.553 | 42.669 | 14.069 | H |
| ATOM | 3982 | O  | HOH A | 1 | 33.377 | 42.969 | 36.512 | O |
| ATOM | 3983 | H1 | HOH A | 2 | 34.173 | 42.501 | 36.185 | H |
| ATOM | 3984 | H2 | HOH A | 3 | 32.587 | 42.499 | 36.172 | H |
| ATOM | 3985 | O  | HOH A | 1 | 33.361 | 43.180 | 58.617 | O |
| ATOM | 3986 | H1 | HOH A | 2 | 34.161 | 42.714 | 58.295 | H |
| ATOM | 3987 | H2 | HOH A | 3 | 32.576 | 42.698 | 58.283 | H |
| ATOM | 3988 | O  | HOH A | 1 | 55.971 | 43.051 | 14.332 | O |
| ATOM | 3989 | H1 | HOH A | 2 | 56.763 | 42.576 | 14.004 | H |
| ATOM | 3990 | H2 | HOH A | 3 | 55.177 | 42.581 | 14.001 | H |
| ATOM | 3991 | O  | HOH A | 1 | 55.976 | 43.012 | 36.469 | O |
| ATOM | 3992 | H1 | HOH A | 2 | 56.770 | 42.538 | 36.145 | H |
| ATOM | 3993 | H2 | HOH A | 3 | 55.184 | 42.538 | 36.138 | H |
| ATOM | 3994 | O  | HOH A | 1 | 55.960 | 43.141 | 58.591 | O |
| ATOM | 3995 | H1 | HOH A | 2 | 56.758 | 42.671 | 58.269 | H |
| ATOM | 3996 | H2 | HOH A | 3 | 55.172 | 42.665 | 58.256 | H |
| ATOM | 3997 | O  | HOH A | 1 | 15.299 | 42.977 | 14.412 | O |
| ATOM | 3998 | H1 | HOH A | 2 | 14.498 | 42.519 | 14.082 | H |

|      |      |    |       |   |        |        |        |   |
|------|------|----|-------|---|--------|--------|--------|---|
| ATOM | 3999 | H2 | HOH A | 3 | 15.281 | 43.898 | 14.077 | H |
| ATOM | 4000 | O  | HOH A | 1 | 15.269 | 42.966 | 36.569 | O |
| ATOM | 4001 | H1 | HOH A | 2 | 14.467 | 42.515 | 36.230 | H |
| ATOM | 4002 | H2 | HOH A | 3 | 15.260 | 43.889 | 36.241 | H |
| ATOM | 4003 | O  | HOH A | 1 | 15.296 | 43.033 | 58.641 | O |
| ATOM | 4004 | H1 | HOH A | 2 | 14.491 | 42.586 | 58.307 | H |
| ATOM | 4005 | H2 | HOH A | 3 | 15.289 | 43.956 | 58.313 | H |
| ATOM | 4006 | O  | HOH A | 1 | 37.893 | 43.122 | 14.387 | O |
| ATOM | 4007 | H1 | HOH A | 2 | 37.081 | 42.679 | 14.062 | H |
| ATOM | 4008 | H2 | HOH A | 3 | 37.883 | 44.047 | 14.063 | H |
| ATOM | 4009 | O  | HOH A | 1 | 37.936 | 42.924 | 36.488 | O |
| ATOM | 4010 | H1 | HOH A | 2 | 37.128 | 42.477 | 36.160 | H |
| ATOM | 4011 | H2 | HOH A | 3 | 37.923 | 43.849 | 36.165 | H |
| ATOM | 4012 | O  | HOH A | 1 | 37.907 | 43.157 | 58.605 | O |
| ATOM | 4013 | H1 | HOH A | 2 | 37.103 | 42.707 | 58.269 | H |
| ATOM | 4014 | H2 | HOH A | 3 | 37.893 | 44.082 | 58.282 | H |
| ATOM | 4015 | O  | HOH A | 1 | 60.507 | 42.993 | 14.345 | O |
| ATOM | 4016 | H1 | HOH A | 2 | 59.703 | 42.545 | 14.009 | H |
| ATOM | 4017 | H2 | HOH A | 3 | 60.498 | 43.917 | 14.019 | H |
| ATOM | 4018 | O  | HOH A | 1 | 60.507 | 42.986 | 36.483 | O |
| ATOM | 4019 | H1 | HOH A | 2 | 59.701 | 42.539 | 36.148 | H |
| ATOM | 4020 | H2 | HOH A | 3 | 60.498 | 43.911 | 36.158 | H |
| ATOM | 4021 | O  | HOH A | 1 | 60.496 | 43.073 | 58.636 | O |
| ATOM | 4022 | H1 | HOH A | 2 | 59.692 | 42.629 | 58.294 | H |
| ATOM | 4023 | H2 | HOH A | 3 | 60.488 | 44.000 | 58.318 | H |
| ATOM | 4024 | O  | HOH A | 1 | 19.786 | 43.036 | 14.398 | O |
| ATOM | 4025 | H1 | HOH A | 2 | 18.984 | 42.580 | 14.069 | H |
| ATOM | 4026 | H2 | HOH A | 3 | 19.769 | 43.957 | 14.063 | H |
| ATOM | 4027 | O  | HOH A | 1 | 19.782 | 42.997 | 36.526 | O |
| ATOM | 4028 | H1 | HOH A | 2 | 18.973 | 42.547 | 36.203 | H |
| ATOM | 4029 | H2 | HOH A | 3 | 19.772 | 43.917 | 36.189 | H |
| ATOM | 4030 | O  | HOH A | 1 | 19.797 | 43.089 | 58.626 | O |
| ATOM | 4031 | H1 | HOH A | 2 | 18.992 | 42.630 | 58.306 | H |
| ATOM | 4032 | H2 | HOH A | 3 | 19.781 | 44.005 | 58.279 | H |
| ATOM | 4033 | O  | HOH A | 1 | 42.394 | 43.152 | 14.345 | O |
| ATOM | 4034 | H1 | HOH A | 2 | 41.589 | 42.700 | 14.017 | H |

|      |      |    |       |   |        |        |        |   |
|------|------|----|-------|---|--------|--------|--------|---|
| ATOM | 4035 | H2 | HOH A | 3 | 42.382 | 44.072 | 14.009 | H |
| ATOM | 4036 | O  | HOH A | 1 | 42.427 | 42.963 | 36.455 | O |
| ATOM | 4037 | H1 | HOH A | 2 | 41.622 | 42.509 | 36.127 | H |
| ATOM | 4038 | H2 | HOH A | 3 | 42.411 | 43.885 | 36.122 | H |
| ATOM | 4039 | O  | HOH A | 1 | 42.407 | 43.183 | 58.575 | O |
| ATOM | 4040 | H1 | HOH A | 2 | 41.602 | 42.727 | 58.251 | H |
| ATOM | 4041 | H2 | HOH A | 3 | 42.391 | 44.102 | 58.236 | H |
| ATOM | 4042 | O  | HOH A | 1 | 65.015 | 43.003 | 14.350 | O |
| ATOM | 4043 | H1 | HOH A | 2 | 64.212 | 42.548 | 14.021 | H |
| ATOM | 4044 | H2 | HOH A | 3 | 64.996 | 43.927 | 14.022 | H |
| ATOM | 4045 | O  | HOH A | 1 | 65.000 | 43.007 | 36.486 | O |
| ATOM | 4046 | H1 | HOH A | 2 | 64.196 | 42.553 | 36.156 | H |
| ATOM | 4047 | H2 | HOH A | 3 | 64.984 | 43.929 | 36.153 | H |
| ATOM | 4048 | O  | HOH A | 1 | 64.985 | 43.081 | 58.628 | O |
| ATOM | 4049 | H1 | HOH A | 2 | 64.179 | 42.631 | 58.299 | H |
| ATOM | 4050 | H2 | HOH A | 3 | 64.976 | 44.002 | 58.292 | H |
| ATOM | 4051 | O  | HOH A | 1 | 1.751  | 45.554 | 13.420 | O |
| ATOM | 4052 | H1 | HOH A | 2 | 0.946  | 46.008 | 13.748 | H |
| ATOM | 4053 | H2 | HOH A | 3 | 1.730  | 45.570 | 12.441 | H |
| ATOM | 4054 | O  | HOH A | 1 | 1.733  | 45.597 | 35.582 | O |
| ATOM | 4055 | H1 | HOH A | 2 | 0.924  | 46.048 | 35.903 | H |
| ATOM | 4056 | H2 | HOH A | 3 | 1.718  | 45.609 | 34.603 | H |
| ATOM | 4057 | O  | HOH A | 1 | 1.731  | 45.650 | 57.712 | O |
| ATOM | 4058 | H1 | HOH A | 2 | 0.926  | 46.104 | 58.040 | H |
| ATOM | 4059 | H2 | HOH A | 3 | 1.707  | 45.663 | 56.733 | H |
| ATOM | 4060 | O  | HOH A | 1 | 24.340 | 45.669 | 13.459 | O |
| ATOM | 4061 | H1 | HOH A | 2 | 23.534 | 46.119 | 13.789 | H |
| ATOM | 4062 | H2 | HOH A | 3 | 24.316 | 45.684 | 12.479 | H |
| ATOM | 4063 | O  | HOH A | 1 | 24.336 | 45.579 | 35.593 | O |
| ATOM | 4064 | H1 | HOH A | 2 | 23.528 | 46.032 | 35.913 | H |
| ATOM | 4065 | H2 | HOH A | 3 | 24.322 | 45.592 | 34.613 | H |
| ATOM | 4066 | O  | HOH A | 1 | 24.353 | 45.703 | 57.689 | O |
| ATOM | 4067 | H1 | HOH A | 2 | 23.545 | 46.160 | 58.005 | H |
| ATOM | 4068 | H2 | HOH A | 3 | 24.336 | 45.703 | 56.709 | H |
| ATOM | 4069 | O  | HOH A | 1 | 46.933 | 45.705 | 13.391 | O |
| ATOM | 4070 | H1 | HOH A | 2 | 46.133 | 46.161 | 13.726 | H |

|      |      |    |       |   |        |        |        |   |
|------|------|----|-------|---|--------|--------|--------|---|
| ATOM | 4071 | H2 | HOH A | 3 | 46.909 | 45.732 | 12.412 | H |
| ATOM | 4072 | O  | HOH A | 1 | 46.970 | 45.563 | 35.516 | O |
| ATOM | 4073 | H1 | HOH A | 2 | 46.165 | 46.014 | 35.847 | H |
| ATOM | 4074 | H2 | HOH A | 3 | 46.947 | 45.580 | 34.537 | H |
| ATOM | 4075 | O  | HOH A | 1 | 46.933 | 45.761 | 57.649 | O |
| ATOM | 4076 | H1 | HOH A | 2 | 46.123 | 46.212 | 57.967 | H |
| ATOM | 4077 | H2 | HOH A | 3 | 46.918 | 45.768 | 56.669 | H |
| ATOM | 4078 | O  | HOH A | 1 | 6.252  | 45.563 | 13.452 | O |
| ATOM | 4079 | H1 | HOH A | 2 | 5.452  | 46.029 | 13.772 | H |
| ATOM | 4080 | H2 | HOH A | 3 | 6.239  | 45.577 | 12.472 | H |
| ATOM | 4081 | O  | HOH A | 1 | 6.226  | 45.624 | 35.596 | O |
| ATOM | 4082 | H1 | HOH A | 2 | 5.423  | 46.088 | 35.914 | H |
| ATOM | 4083 | H2 | HOH A | 3 | 6.218  | 45.641 | 34.616 | H |
| ATOM | 4084 | O  | HOH A | 1 | 6.229  | 45.657 | 57.716 | O |
| ATOM | 4085 | H1 | HOH A | 2 | 5.430  | 46.124 | 58.036 | H |
| ATOM | 4086 | H2 | HOH A | 3 | 6.216  | 45.671 | 56.736 | H |
| ATOM | 4087 | O  | HOH A | 1 | 28.831 | 45.729 | 13.460 | O |
| ATOM | 4088 | H1 | HOH A | 2 | 28.027 | 46.187 | 13.783 | H |
| ATOM | 4089 | H2 | HOH A | 3 | 28.824 | 45.758 | 12.480 | H |
| ATOM | 4090 | O  | HOH A | 1 | 28.840 | 45.591 | 35.580 | O |
| ATOM | 4091 | H1 | HOH A | 2 | 28.043 | 46.061 | 35.904 | H |
| ATOM | 4092 | H2 | HOH A | 3 | 28.824 | 45.610 | 34.600 | H |
| ATOM | 4093 | O  | HOH A | 1 | 28.846 | 45.750 | 57.675 | O |
| ATOM | 4094 | H1 | HOH A | 2 | 28.043 | 46.214 | 57.992 | H |
| ATOM | 4095 | H2 | HOH A | 3 | 28.833 | 45.757 | 56.695 | H |
| ATOM | 4096 | O  | HOH A | 1 | 51.439 | 45.705 | 13.380 | O |
| ATOM | 4097 | H1 | HOH A | 2 | 50.638 | 46.165 | 13.706 | H |
| ATOM | 4098 | H2 | HOH A | 3 | 51.429 | 45.737 | 12.401 | H |
| ATOM | 4099 | O  | HOH A | 1 | 51.466 | 45.604 | 35.511 | O |
| ATOM | 4100 | H1 | HOH A | 2 | 50.667 | 46.067 | 35.840 | H |
| ATOM | 4101 | H2 | HOH A | 3 | 51.447 | 45.626 | 34.531 | H |
| ATOM | 4102 | O  | HOH A | 1 | 51.433 | 45.765 | 57.654 | O |
| ATOM | 4103 | H1 | HOH A | 2 | 50.633 | 46.233 | 57.973 | H |
| ATOM | 4104 | H2 | HOH A | 3 | 51.421 | 45.777 | 56.674 | H |
| ATOM | 4105 | O  | HOH A | 1 | 10.775 | 45.573 | 13.446 | O |
| ATOM | 4106 | H1 | HOH A | 2 | 10.776 | 44.647 | 13.767 | H |

|      |      |    |       |   |        |        |        |   |
|------|------|----|-------|---|--------|--------|--------|---|
| ATOM | 4107 | H2 | HOH A | 3 | 10.775 | 45.553 | 12.466 | H |
| ATOM | 4108 | O  | HOH A | 1 | 10.752 | 45.599 | 35.590 | O |
| ATOM | 4109 | H1 | HOH A | 2 | 10.739 | 44.672 | 35.909 | H |
| ATOM | 4110 | H2 | HOH A | 3 | 10.743 | 45.583 | 34.611 | H |
| ATOM | 4111 | O  | HOH A | 1 | 10.764 | 45.658 | 57.710 | O |
| ATOM | 4112 | H1 | HOH A | 2 | 10.759 | 44.728 | 58.020 | H |
| ATOM | 4113 | H2 | HOH A | 3 | 10.752 | 45.650 | 56.730 | H |
| ATOM | 4114 | O  | HOH A | 1 | 33.357 | 45.748 | 13.435 | O |
| ATOM | 4115 | H1 | HOH A | 2 | 33.341 | 44.822 | 13.755 | H |
| ATOM | 4116 | H2 | HOH A | 3 | 33.363 | 45.730 | 12.455 | H |
| ATOM | 4117 | O  | HOH A | 1 | 33.382 | 45.583 | 35.566 | O |
| ATOM | 4118 | H1 | HOH A | 2 | 33.372 | 44.655 | 35.882 | H |
| ATOM | 4119 | H2 | HOH A | 3 | 33.389 | 45.569 | 34.586 | H |
| ATOM | 4120 | O  | HOH A | 1 | 33.376 | 45.770 | 57.657 | O |
| ATOM | 4121 | H1 | HOH A | 2 | 33.366 | 44.847 | 57.987 | H |
| ATOM | 4122 | H2 | HOH A | 3 | 33.377 | 45.741 | 56.678 | H |
| ATOM | 4123 | O  | HOH A | 1 | 55.963 | 45.653 | 13.379 | O |
| ATOM | 4124 | H1 | HOH A | 2 | 55.957 | 44.723 | 13.689 | H |
| ATOM | 4125 | H2 | HOH A | 3 | 55.959 | 45.645 | 12.399 | H |
| ATOM | 4126 | O  | HOH A | 1 | 55.997 | 45.612 | 35.503 | O |
| ATOM | 4127 | H1 | HOH A | 2 | 55.988 | 44.687 | 35.826 | H |
| ATOM | 4128 | H2 | HOH A | 3 | 55.996 | 45.592 | 34.524 | H |
| ATOM | 4129 | O  | HOH A | 1 | 55.964 | 45.740 | 57.655 | O |
| ATOM | 4130 | H1 | HOH A | 2 | 55.951 | 44.813 | 57.974 | H |
| ATOM | 4131 | H2 | HOH A | 3 | 55.968 | 45.723 | 56.675 | H |
| ATOM | 4132 | O  | HOH A | 1 | 15.281 | 45.574 | 13.468 | O |
| ATOM | 4133 | H1 | HOH A | 2 | 14.488 | 46.038 | 13.807 | H |
| ATOM | 4134 | H2 | HOH A | 3 | 16.073 | 46.049 | 13.797 | H |
| ATOM | 4135 | O  | HOH A | 1 | 15.258 | 45.567 | 35.625 | O |
| ATOM | 4136 | H1 | HOH A | 2 | 14.463 | 46.031 | 35.962 | H |
| ATOM | 4137 | H2 | HOH A | 3 | 16.049 | 46.041 | 35.957 | H |
| ATOM | 4138 | O  | HOH A | 1 | 15.279 | 45.641 | 57.714 | O |
| ATOM | 4139 | H1 | HOH A | 2 | 14.486 | 46.102 | 58.057 | H |
| ATOM | 4140 | H2 | HOH A | 3 | 16.071 | 46.116 | 58.041 | H |
| ATOM | 4141 | O  | HOH A | 1 | 37.879 | 45.730 | 13.441 | O |
| ATOM | 4142 | H1 | HOH A | 2 | 37.081 | 46.188 | 13.779 | H |

|      |      |    |       |   |        |        |        |   |
|------|------|----|-------|---|--------|--------|--------|---|
| ATOM | 4143 | H2 | HOH A | 3 | 38.666 | 46.209 | 13.775 | H |
| ATOM | 4144 | O  | HOH A | 1 | 37.911 | 45.532 | 35.569 | O |
| ATOM | 4145 | H1 | HOH A | 2 | 37.119 | 45.998 | 35.910 | H |
| ATOM | 4146 | H2 | HOH A | 3 | 38.705 | 46.005 | 35.896 | H |
| ATOM | 4147 | O  | HOH A | 1 | 37.881 | 45.757 | 57.676 | O |
| ATOM | 4148 | H1 | HOH A | 2 | 37.089 | 46.224 | 58.016 | H |
| ATOM | 4149 | H2 | HOH A | 3 | 38.675 | 46.232 | 57.999 | H |
| ATOM | 4150 | O  | HOH A | 1 | 60.486 | 45.592 | 13.414 | O |
| ATOM | 4151 | H1 | HOH A | 2 | 59.693 | 46.060 | 13.750 | H |
| ATOM | 4152 | H2 | HOH A | 3 | 61.278 | 46.060 | 13.750 | H |
| ATOM | 4153 | O  | HOH A | 1 | 60.487 | 45.584 | 35.553 | O |
| ATOM | 4154 | H1 | HOH A | 2 | 59.695 | 46.051 | 35.893 | H |
| ATOM | 4155 | H2 | HOH A | 3 | 61.281 | 46.057 | 35.880 | H |
| ATOM | 4156 | O  | HOH A | 1 | 60.477 | 45.670 | 57.696 | O |
| ATOM | 4157 | H1 | HOH A | 2 | 59.686 | 46.144 | 58.029 | H |
| ATOM | 4158 | H2 | HOH A | 3 | 61.272 | 46.142 | 58.022 | H |
| ATOM | 4159 | O  | HOH A | 1 | 19.827 | 45.644 | 13.468 | O |
| ATOM | 4160 | H1 | HOH A | 2 | 19.022 | 46.105 | 13.785 | H |
| ATOM | 4161 | H2 | HOH A | 3 | 19.822 | 45.664 | 12.488 | H |
| ATOM | 4162 | O  | HOH A | 1 | 19.798 | 45.610 | 35.606 | O |
| ATOM | 4163 | H1 | HOH A | 2 | 18.995 | 46.067 | 35.932 | H |
| ATOM | 4164 | H2 | HOH A | 3 | 19.785 | 45.637 | 34.626 | H |
| ATOM | 4165 | O  | HOH A | 1 | 19.822 | 45.693 | 57.696 | O |
| ATOM | 4166 | H1 | HOH A | 2 | 19.017 | 46.152 | 58.017 | H |
| ATOM | 4167 | H2 | HOH A | 3 | 19.807 | 45.707 | 56.716 | H |
| ATOM | 4168 | O  | HOH A | 1 | 42.407 | 45.760 | 13.429 | O |
| ATOM | 4169 | H1 | HOH A | 2 | 41.610 | 46.222 | 13.763 | H |
| ATOM | 4170 | H2 | HOH A | 3 | 42.386 | 45.789 | 12.450 | H |
| ATOM | 4171 | O  | HOH A | 1 | 42.441 | 45.577 | 35.546 | O |
| ATOM | 4172 | H1 | HOH A | 2 | 41.639 | 46.040 | 35.868 | H |
| ATOM | 4173 | H2 | HOH A | 3 | 42.431 | 45.601 | 34.566 | H |
| ATOM | 4174 | O  | HOH A | 1 | 42.414 | 45.787 | 57.656 | O |
| ATOM | 4175 | H1 | HOH A | 2 | 41.617 | 46.260 | 57.974 | H |
| ATOM | 4176 | H2 | HOH A | 3 | 42.404 | 45.800 | 56.676 | H |
| ATOM | 4177 | O  | HOH A | 1 | 65.017 | 45.611 | 13.429 | O |
| ATOM | 4178 | H1 | HOH A | 2 | 64.216 | 46.077 | 13.750 | H |



|      |      |    |       |   |        |        |        |   |
|------|------|----|-------|---|--------|--------|--------|---|
| ATOM | 4179 | H2 | HOH A | 3 | 65.005 | 45.628 | 12.449 | H |
| ATOM | 4180 | O  | HOH A | 1 | 65.006 | 45.620 | 35.558 | O |
| ATOM | 4181 | H1 | HOH A | 2 | 64.204 | 46.082 | 35.882 | H |
| ATOM | 4182 | H2 | HOH A | 3 | 64.988 | 45.636 | 34.578 | H |
| ATOM | 4183 | O  | HOH A | 1 | 65.015 | 45.690 | 57.710 | O |
| ATOM | 4184 | H1 | HOH A | 2 | 64.216 | 46.153 | 58.037 | H |
| ATOM | 4185 | H2 | HOH A | 3 | 64.995 | 45.705 | 56.730 | H |
| ATOM | 4186 | O  | HOH A | 1 | 22.082 | 26.090 | 13.485 | O |
| ATOM | 4187 | H1 | HOH A | 2 | 22.100 | 25.165 | 13.808 | H |
| ATOM | 4188 | H2 | HOH A | 3 | 22.887 | 26.541 | 13.814 | H |
| ATOM | 4189 | O  | HOH A | 1 | 22.064 | 26.013 | 35.610 | O |
| ATOM | 4190 | H1 | HOH A | 2 | 22.073 | 25.090 | 35.939 | H |
| ATOM | 4191 | H2 | HOH A | 3 | 22.875 | 26.458 | 35.933 | H |
| ATOM | 4192 | O  | HOH A | 1 | 22.080 | 26.127 | 57.696 | O |
| ATOM | 4193 | H1 | HOH A | 2 | 22.098 | 25.203 | 58.021 | H |
| ATOM | 4194 | H2 | HOH A | 3 | 22.884 | 26.580 | 58.025 | H |
| ATOM | 4195 | O  | HOH A | 1 | 44.681 | 26.170 | 13.401 | O |
| ATOM | 4196 | H1 | HOH A | 2 | 44.697 | 25.248 | 13.732 | H |
| ATOM | 4197 | H2 | HOH A | 3 | 45.486 | 26.624 | 13.728 | H |
| ATOM | 4198 | O  | HOH A | 1 | 44.713 | 25.996 | 35.537 | O |
| ATOM | 4199 | H1 | HOH A | 2 | 44.732 | 25.072 | 35.861 | H |
| ATOM | 4200 | H2 | HOH A | 3 | 45.521 | 26.448 | 35.860 | H |
| ATOM | 4201 | O  | HOH A | 1 | 44.672 | 26.196 | 57.654 | O |
| ATOM | 4202 | H1 | HOH A | 2 | 44.687 | 25.273 | 57.983 | H |
| ATOM | 4203 | H2 | HOH A | 3 | 45.479 | 26.647 | 57.977 | H |
| ATOM | 4204 | O  | HOH A | 1 | 67.279 | 26.014 | 13.431 | O |
| ATOM | 4205 | H1 | HOH A | 2 | 67.295 | 25.089 | 13.755 | H |
| ATOM | 4206 | H2 | HOH A | 3 | 68.088 | 26.462 | 13.754 | H |
| ATOM | 4207 | O  | HOH A | 1 | 67.263 | 26.029 | 35.584 | O |
| ATOM | 4208 | H1 | HOH A | 2 | 67.284 | 25.105 | 35.909 | H |
| ATOM | 4209 | H2 | HOH A | 3 | 68.070 | 26.482 | 35.907 | H |
| ATOM | 4210 | O  | HOH A | 1 | 67.271 | 26.105 | 57.716 | O |
| ATOM | 4211 | H1 | HOH A | 2 | 67.286 | 25.182 | 58.045 | H |
| ATOM | 4212 | H2 | HOH A | 3 | 68.082 | 26.553 | 58.034 | H |
| ATOM | 4213 | O  | HOH A | 1 | 4.002  | 26.011 | 13.419 | O |
| ATOM | 4214 | H1 | HOH A | 2 | 4.000  | 25.082 | 13.729 | H |

|      |      |    |       |   |        |        |        |   |
|------|------|----|-------|---|--------|--------|--------|---|
| ATOM | 4215 | H2 | HOH A | 3 | 4.012  | 26.003 | 12.439 | H |
| ATOM | 4216 | O  | HOH A | 1 | 3.967  | 26.054 | 35.593 | O |
| ATOM | 4217 | H1 | HOH A | 2 | 3.964  | 25.127 | 35.910 | H |
| ATOM | 4218 | H2 | HOH A | 3 | 3.985  | 26.039 | 34.614 | H |
| ATOM | 4219 | O  | HOH A | 1 | 3.993  | 26.107 | 57.703 | O |
| ATOM | 4220 | H1 | HOH A | 2 | 3.994  | 25.179 | 58.018 | H |
| ATOM | 4221 | H2 | HOH A | 3 | 4.003  | 26.095 | 56.724 | H |
| ATOM | 4222 | O  | HOH A | 1 | 26.591 | 26.161 | 13.467 | O |
| ATOM | 4223 | H1 | HOH A | 2 | 26.582 | 25.233 | 13.780 | H |
| ATOM | 4224 | H2 | HOH A | 3 | 26.612 | 26.151 | 12.487 | H |
| ATOM | 4225 | O  | HOH A | 1 | 26.589 | 26.047 | 35.588 | O |
| ATOM | 4226 | H1 | HOH A | 2 | 26.586 | 25.119 | 35.903 | H |
| ATOM | 4227 | H2 | HOH A | 3 | 26.596 | 26.033 | 34.608 | H |
| ATOM | 4228 | O  | HOH A | 1 | 26.589 | 26.188 | 57.677 | O |
| ATOM | 4229 | H1 | HOH A | 2 | 26.589 | 25.262 | 57.998 | H |
| ATOM | 4230 | H2 | HOH A | 3 | 26.611 | 26.169 | 56.697 | H |
| ATOM | 4231 | O  | HOH A | 1 | 49.184 | 26.168 | 13.388 | O |
| ATOM | 4232 | H1 | HOH A | 2 | 49.173 | 25.236 | 13.690 | H |
| ATOM | 4233 | H2 | HOH A | 3 | 49.195 | 26.169 | 12.408 | H |
| ATOM | 4234 | O  | HOH A | 1 | 49.224 | 26.033 | 35.520 | O |
| ATOM | 4235 | H1 | HOH A | 2 | 49.221 | 25.104 | 35.832 | H |
| ATOM | 4236 | H2 | HOH A | 3 | 49.234 | 26.024 | 34.540 | H |
| ATOM | 4237 | O  | HOH A | 1 | 49.188 | 26.222 | 57.661 | O |
| ATOM | 4238 | H1 | HOH A | 2 | 49.183 | 25.295 | 57.978 | H |
| ATOM | 4239 | H2 | HOH A | 3 | 49.205 | 26.207 | 56.681 | H |
| ATOM | 4240 | O  | HOH A | 1 | 8.518  | 25.990 | 13.446 | O |
| ATOM | 4241 | H1 | HOH A | 2 | 8.547  | 25.070 | 13.784 | H |
| ATOM | 4242 | H2 | HOH A | 3 | 9.313  | 26.459 | 13.775 | H |
| ATOM | 4243 | O  | HOH A | 1 | 8.495  | 26.025 | 35.602 | O |
| ATOM | 4244 | H1 | HOH A | 2 | 8.526  | 25.106 | 35.943 | H |
| ATOM | 4245 | H2 | HOH A | 3 | 9.295  | 26.493 | 35.920 | H |
| ATOM | 4246 | O  | HOH A | 1 | 8.508  | 26.074 | 57.717 | O |
| ATOM | 4247 | H1 | HOH A | 2 | 8.533  | 25.156 | 58.058 | H |
| ATOM | 4248 | H2 | HOH A | 3 | 9.310  | 26.537 | 58.036 | H |
| ATOM | 4249 | O  | HOH A | 1 | 31.110 | 26.168 | 13.454 | O |
| ATOM | 4250 | H1 | HOH A | 2 | 31.137 | 25.249 | 13.793 | H |

|      |      |    |       |   |        |        |        |   |
|------|------|----|-------|---|--------|--------|--------|---|
| ATOM | 4251 | H2 | HOH A | 3 | 31.911 | 26.633 | 13.773 | H |
| ATOM | 4252 | O  | HOH A | 1 | 31.134 | 26.019 | 35.585 | O |
| ATOM | 4253 | H1 | HOH A | 2 | 31.163 | 25.095 | 35.912 | H |
| ATOM | 4254 | H2 | HOH A | 3 | 31.936 | 26.480 | 35.907 | H |
| ATOM | 4255 | O  | HOH A | 1 | 31.126 | 26.177 | 57.671 | O |
| ATOM | 4256 | H1 | HOH A | 2 | 31.150 | 25.258 | 58.010 | H |
| ATOM | 4257 | H2 | HOH A | 3 | 31.923 | 26.642 | 58.000 | H |
| ATOM | 4258 | O  | HOH A | 1 | 53.721 | 26.089 | 13.382 | O |
| ATOM | 4259 | H1 | HOH A | 2 | 53.750 | 25.167 | 13.713 | H |
| ATOM | 4260 | H2 | HOH A | 3 | 54.520 | 26.552 | 13.707 | H |
| ATOM | 4261 | O  | HOH A | 1 | 53.738 | 26.011 | 35.534 | O |
| ATOM | 4262 | H1 | HOH A | 2 | 53.764 | 25.090 | 35.868 | H |
| ATOM | 4263 | H2 | HOH A | 3 | 54.538 | 26.474 | 35.858 | H |
| ATOM | 4264 | O  | HOH A | 1 | 53.710 | 26.169 | 57.666 | O |
| ATOM | 4265 | H1 | HOH A | 2 | 53.728 | 25.249 | 58.003 | H |
| ATOM | 4266 | H2 | HOH A | 3 | 54.513 | 26.627 | 57.991 | H |
| ATOM | 4267 | O  | HOH A | 1 | 13.007 | 26.010 | 13.469 | O |
| ATOM | 4268 | H1 | HOH A | 2 | 13.014 | 25.086 | 13.795 | H |
| ATOM | 4269 | H2 | HOH A | 3 | 13.807 | 26.458 | 13.814 | H |
| ATOM | 4270 | O  | HOH A | 1 | 12.981 | 26.031 | 35.618 | O |
| ATOM | 4271 | H1 | HOH A | 2 | 12.994 | 25.107 | 35.946 | H |
| ATOM | 4272 | H2 | HOH A | 3 | 13.790 | 26.479 | 35.944 | H |
| ATOM | 4273 | O  | HOH A | 1 | 12.996 | 26.086 | 57.725 | O |
| ATOM | 4274 | H1 | HOH A | 2 | 13.012 | 25.164 | 58.056 | H |
| ATOM | 4275 | H2 | HOH A | 3 | 13.802 | 26.539 | 58.051 | H |
| ATOM | 4276 | O  | HOH A | 1 | 35.600 | 26.187 | 13.469 | O |
| ATOM | 4277 | H1 | HOH A | 2 | 35.611 | 25.261 | 13.789 | H |
| ATOM | 4278 | H2 | HOH A | 3 | 36.411 | 26.630 | 13.797 | H |
| ATOM | 4279 | O  | HOH A | 1 | 35.632 | 26.010 | 35.588 | O |
| ATOM | 4280 | H1 | HOH A | 2 | 35.639 | 25.081 | 35.900 | H |
| ATOM | 4281 | H2 | HOH A | 3 | 36.444 | 26.448 | 35.919 | H |
| ATOM | 4282 | O  | HOH A | 1 | 35.611 | 26.217 | 57.667 | O |
| ATOM | 4283 | H1 | HOH A | 2 | 35.627 | 25.294 | 57.998 | H |
| ATOM | 4284 | H2 | HOH A | 3 | 36.412 | 26.672 | 58.000 | H |
| ATOM | 4285 | O  | HOH A | 1 | 58.193 | 26.069 | 13.396 | O |
| ATOM | 4286 | H1 | HOH A | 2 | 58.207 | 25.141 | 13.710 | H |

|      |      |    |       |   |        |        |        |   |
|------|------|----|-------|---|--------|--------|--------|---|
| ATOM | 4287 | H2 | HOH A | 3 | 59.005 | 26.512 | 13.720 | H |
| ATOM | 4288 | O  | HOH A | 1 | 58.219 | 26.044 | 35.542 | O |
| ATOM | 4289 | H1 | HOH A | 2 | 58.232 | 25.117 | 35.861 | H |
| ATOM | 4290 | H2 | HOH A | 3 | 59.022 | 26.492 | 35.881 | H |
| ATOM | 4291 | O  | HOH A | 1 | 58.202 | 26.153 | 57.692 | O |
| ATOM | 4292 | H1 | HOH A | 2 | 58.212 | 25.227 | 58.012 | H |
| ATOM | 4293 | H2 | HOH A | 3 | 59.015 | 26.594 | 58.013 | H |
| ATOM | 4294 | O  | HOH A | 1 | 17.566 | 26.017 | 13.456 | O |
| ATOM | 4295 | H1 | HOH A | 2 | 16.764 | 26.485 | 13.772 | H |
| ATOM | 4296 | H2 | HOH A | 3 | 18.350 | 26.504 | 13.786 | H |
| ATOM | 4297 | O  | HOH A | 1 | 17.547 | 26.002 | 35.611 | O |
| ATOM | 4298 | H1 | HOH A | 2 | 16.753 | 26.484 | 35.924 | H |
| ATOM | 4299 | H2 | HOH A | 3 | 18.339 | 26.477 | 35.938 | H |
| ATOM | 4300 | O  | HOH A | 1 | 17.569 | 26.070 | 57.689 | O |
| ATOM | 4301 | H1 | HOH A | 2 | 16.769 | 26.546 | 57.994 | H |
| ATOM | 4302 | H2 | HOH A | 3 | 18.354 | 26.558 | 58.017 | H |
| ATOM | 4303 | O  | HOH A | 1 | 40.172 | 26.171 | 13.425 | O |
| ATOM | 4304 | H1 | HOH A | 2 | 39.378 | 26.646 | 13.748 | H |
| ATOM | 4305 | H2 | HOH A | 3 | 40.964 | 26.654 | 13.742 | H |
| ATOM | 4306 | O  | HOH A | 1 | 40.193 | 25.979 | 35.557 | O |
| ATOM | 4307 | H1 | HOH A | 2 | 39.403 | 26.458 | 35.883 | H |
| ATOM | 4308 | H2 | HOH A | 3 | 40.989 | 26.451 | 35.880 | H |
| ATOM | 4309 | O  | HOH A | 1 | 40.165 | 26.189 | 57.650 | O |
| ATOM | 4310 | H1 | HOH A | 2 | 39.368 | 26.668 | 57.961 | H |
| ATOM | 4311 | H2 | HOH A | 3 | 40.954 | 26.671 | 57.973 | H |
| ATOM | 4312 | O  | HOH A | 1 | 62.761 | 26.009 | 13.396 | O |
| ATOM | 4313 | H1 | HOH A | 2 | 61.967 | 26.495 | 13.703 | H |
| ATOM | 4314 | H2 | HOH A | 3 | 63.553 | 26.481 | 13.729 | H |
| ATOM | 4315 | O  | HOH A | 1 | 62.763 | 26.012 | 35.549 | O |
| ATOM | 4316 | H1 | HOH A | 2 | 61.964 | 26.488 | 35.859 | H |
| ATOM | 4317 | H2 | HOH A | 3 | 63.550 | 26.489 | 35.887 | H |
| ATOM | 4318 | O  | HOH A | 1 | 62.768 | 26.088 | 57.690 | O |
| ATOM | 4319 | H1 | HOH A | 2 | 61.975 | 26.569 | 58.006 | H |
| ATOM | 4320 | H2 | HOH A | 3 | 63.561 | 26.567 | 58.011 | H |
| ATOM | 4321 | O  | HOH A | 1 | 1.753  | 29.934 | 13.429 | O |
| ATOM | 4322 | H1 | HOH A | 2 | 1.765  | 29.004 | 13.739 | H |

|      |      |    |       |   |        |        |        |   |
|------|------|----|-------|---|--------|--------|--------|---|
| ATOM | 4323 | H2 | HOH A | 3 | 1.746  | 29.926 | 12.449 | H |
| ATOM | 4324 | O  | HOH A | 1 | 1.716  | 29.973 | 35.566 | O |
| ATOM | 4325 | H1 | HOH A | 2 | 1.721  | 29.043 | 35.877 | H |
| ATOM | 4326 | H2 | HOH A | 3 | 1.712  | 29.964 | 34.586 | H |
| ATOM | 4327 | O  | HOH A | 1 | 1.732  | 30.022 | 57.704 | O |
| ATOM | 4328 | H1 | HOH A | 2 | 1.750  | 29.094 | 58.016 | H |
| ATOM | 4329 | H2 | HOH A | 3 | 1.718  | 30.012 | 56.724 | H |
| ATOM | 4330 | O  | HOH A | 1 | 24.339 | 30.047 | 13.466 | O |
| ATOM | 4331 | H1 | HOH A | 2 | 24.349 | 29.114 | 13.767 | H |
| ATOM | 4332 | H2 | HOH A | 3 | 24.333 | 30.049 | 12.486 | H |
| ATOM | 4333 | O  | HOH A | 1 | 24.324 | 29.944 | 35.601 | O |
| ATOM | 4334 | H1 | HOH A | 2 | 24.334 | 29.015 | 35.912 | H |
| ATOM | 4335 | H2 | HOH A | 3 | 24.319 | 29.935 | 34.621 | H |
| ATOM | 4336 | O  | HOH A | 1 | 24.343 | 30.085 | 57.697 | O |
| ATOM | 4337 | H1 | HOH A | 2 | 24.346 | 29.158 | 58.016 | H |
| ATOM | 4338 | H2 | HOH A | 3 | 24.334 | 30.068 | 56.717 | H |
| ATOM | 4339 | O  | HOH A | 1 | 46.934 | 30.103 | 13.384 | O |
| ATOM | 4340 | H1 | HOH A | 2 | 46.947 | 29.173 | 13.693 | H |
| ATOM | 4341 | H2 | HOH A | 3 | 46.919 | 30.097 | 12.404 | H |
| ATOM | 4342 | O  | HOH A | 1 | 46.973 | 29.940 | 35.517 | O |
| ATOM | 4343 | H1 | HOH A | 2 | 46.989 | 29.009 | 35.824 | H |
| ATOM | 4344 | H2 | HOH A | 3 | 46.970 | 29.935 | 34.537 | H |
| ATOM | 4345 | O  | HOH A | 1 | 46.936 | 30.131 | 57.646 | O |
| ATOM | 4346 | H1 | HOH A | 2 | 46.944 | 29.202 | 57.960 | H |
| ATOM | 4347 | H2 | HOH A | 3 | 46.931 | 30.119 | 56.666 | H |
| ATOM | 4348 | O  | HOH A | 1 | 6.274  | 29.896 | 13.456 | O |
| ATOM | 4349 | H1 | HOH A | 2 | 6.257  | 28.974 | 13.787 | H |
| ATOM | 4350 | H2 | HOH A | 3 | 5.469  | 30.350 | 13.782 | H |
| ATOM | 4351 | O  | HOH A | 1 | 6.240  | 29.927 | 35.599 | O |
| ATOM | 4352 | H1 | HOH A | 2 | 6.231  | 29.007 | 35.938 | H |
| ATOM | 4353 | H2 | HOH A | 3 | 5.432  | 30.377 | 35.922 | H |
| ATOM | 4354 | O  | HOH A | 1 | 6.259  | 29.993 | 57.725 | O |
| ATOM | 4355 | H1 | HOH A | 2 | 6.243  | 29.071 | 58.057 | H |
| ATOM | 4356 | H2 | HOH A | 3 | 5.455  | 30.446 | 58.053 | H |
| ATOM | 4357 | O  | HOH A | 1 | 28.858 | 30.049 | 13.466 | O |
| ATOM | 4358 | H1 | HOH A | 2 | 28.855 | 29.128 | 13.800 | H |

|      |      |    |       |   |        |        |        |   |
|------|------|----|-------|---|--------|--------|--------|---|
| ATOM | 4359 | H2 | HOH A | 3 | 28.053 | 30.496 | 13.804 | H |
| ATOM | 4360 | O  | HOH A | 1 | 28.863 | 29.924 | 35.616 | O |
| ATOM | 4361 | H1 | HOH A | 2 | 28.853 | 28.998 | 35.937 | H |
| ATOM | 4362 | H2 | HOH A | 3 | 28.057 | 30.369 | 35.950 | H |
| ATOM | 4363 | O  | HOH A | 1 | 28.873 | 30.084 | 57.692 | O |
| ATOM | 4364 | H1 | HOH A | 2 | 28.871 | 29.163 | 58.026 | H |
| ATOM | 4365 | H2 | HOH A | 3 | 28.064 | 30.528 | 58.022 | H |
| ATOM | 4366 | O  | HOH A | 1 | 51.477 | 30.019 | 13.395 | O |
| ATOM | 4367 | H1 | HOH A | 2 | 51.462 | 29.093 | 13.716 | H |
| ATOM | 4368 | H2 | HOH A | 3 | 50.675 | 30.470 | 13.733 | H |
| ATOM | 4369 | O  | HOH A | 1 | 51.497 | 29.930 | 35.540 | O |
| ATOM | 4370 | H1 | HOH A | 2 | 51.485 | 29.006 | 35.867 | H |
| ATOM | 4371 | H2 | HOH A | 3 | 50.689 | 30.378 | 35.865 | H |
| ATOM | 4372 | O  | HOH A | 1 | 51.467 | 30.096 | 57.659 | O |
| ATOM | 4373 | H1 | HOH A | 2 | 51.456 | 29.175 | 57.994 | H |
| ATOM | 4374 | H2 | HOH A | 3 | 50.660 | 30.547 | 57.986 | H |
| ATOM | 4375 | O  | HOH A | 1 | 10.783 | 29.914 | 13.493 | O |
| ATOM | 4376 | H1 | HOH A | 2 | 9.975  | 30.380 | 13.796 | H |
| ATOM | 4377 | H2 | HOH A | 3 | 10.785 | 29.917 | 12.513 | H |
| ATOM | 4378 | O  | HOH A | 1 | 10.747 | 29.950 | 35.637 | O |
| ATOM | 4379 | H1 | HOH A | 2 | 9.940  | 30.414 | 35.945 | H |
| ATOM | 4380 | H2 | HOH A | 3 | 10.739 | 29.947 | 34.657 | H |
| ATOM | 4381 | O  | HOH A | 1 | 10.764 | 30.003 | 57.746 | O |
| ATOM | 4382 | H1 | HOH A | 2 | 9.960  | 30.470 | 58.056 | H |
| ATOM | 4383 | H2 | HOH A | 3 | 10.754 | 30.000 | 56.766 | H |
| ATOM | 4384 | O  | HOH A | 1 | 33.381 | 30.089 | 13.481 | O |
| ATOM | 4385 | H1 | HOH A | 2 | 32.569 | 30.543 | 13.788 | H |
| ATOM | 4386 | H2 | HOH A | 3 | 33.375 | 30.088 | 12.501 | H |
| ATOM | 4387 | O  | HOH A | 1 | 33.393 | 29.928 | 35.616 | O |
| ATOM | 4388 | H1 | HOH A | 2 | 32.587 | 30.394 | 35.924 | H |
| ATOM | 4389 | H2 | HOH A | 3 | 33.383 | 29.923 | 34.636 | H |
| ATOM | 4390 | O  | HOH A | 1 | 33.390 | 30.118 | 57.699 | O |
| ATOM | 4391 | H1 | HOH A | 2 | 32.582 | 30.583 | 58.000 | H |
| ATOM | 4392 | H2 | HOH A | 3 | 33.384 | 30.102 | 56.719 | H |
| ATOM | 4393 | O  | HOH A | 1 | 55.978 | 29.995 | 13.417 | O |
| ATOM | 4394 | H1 | HOH A | 2 | 55.176 | 30.465 | 13.729 | H |

|      |      |    |       |   |        |        |        |   |
|------|------|----|-------|---|--------|--------|--------|---|
| ATOM | 4395 | H2 | HOH A | 3 | 55.970 | 30.001 | 12.437 | H |
| ATOM | 4396 | O  | HOH A | 1 | 55.990 | 29.941 | 35.565 | O |
| ATOM | 4397 | H1 | HOH A | 2 | 55.182 | 30.403 | 35.873 | H |
| ATOM | 4398 | H2 | HOH A | 3 | 55.979 | 29.933 | 34.585 | H |
| ATOM | 4399 | O  | HOH A | 1 | 55.977 | 30.066 | 57.700 | O |
| ATOM | 4400 | H1 | HOH A | 2 | 55.173 | 30.540 | 57.997 | H |
| ATOM | 4401 | H2 | HOH A | 3 | 55.976 | 30.053 | 56.720 | H |
| ATOM | 4402 | O  | HOH A | 1 | 15.295 | 29.923 | 13.473 | O |
| ATOM | 4403 | H1 | HOH A | 2 | 14.495 | 30.385 | 13.798 | H |
| ATOM | 4404 | H2 | HOH A | 3 | 16.080 | 30.408 | 13.801 | H |
| ATOM | 4405 | O  | HOH A | 1 | 15.259 | 29.934 | 35.624 | O |
| ATOM | 4406 | H1 | HOH A | 2 | 14.465 | 30.407 | 35.950 | H |
| ATOM | 4407 | H2 | HOH A | 3 | 16.050 | 30.411 | 35.950 | H |
| ATOM | 4408 | O  | HOH A | 1 | 15.283 | 29.997 | 57.698 | O |
| ATOM | 4409 | H1 | HOH A | 2 | 14.484 | 30.461 | 58.024 | H |
| ATOM | 4410 | H2 | HOH A | 3 | 16.070 | 30.479 | 58.028 | H |
| ATOM | 4411 | O  | HOH A | 1 | 37.876 | 30.107 | 13.434 | O |
| ATOM | 4412 | H1 | HOH A | 2 | 37.082 | 30.570 | 13.772 | H |
| ATOM | 4413 | H2 | HOH A | 3 | 38.667 | 30.590 | 13.752 | H |
| ATOM | 4414 | O  | HOH A | 1 | 37.912 | 29.910 | 35.547 | O |
| ATOM | 4415 | H1 | HOH A | 2 | 37.121 | 30.386 | 35.877 | H |
| ATOM | 4416 | H2 | HOH A | 3 | 38.707 | 30.384 | 35.870 | H |
| ATOM | 4417 | O  | HOH A | 1 | 37.892 | 30.117 | 57.654 | O |
| ATOM | 4418 | H1 | HOH A | 2 | 37.096 | 30.588 | 57.980 | H |
| ATOM | 4419 | H2 | HOH A | 3 | 38.682 | 30.600 | 57.976 | H |
| ATOM | 4420 | O  | HOH A | 1 | 60.477 | 29.952 | 13.385 | O |
| ATOM | 4421 | H1 | HOH A | 2 | 59.687 | 30.426 | 13.719 | H |
| ATOM | 4422 | H2 | HOH A | 3 | 61.273 | 30.421 | 13.713 | H |
| ATOM | 4423 | O  | HOH A | 1 | 60.481 | 29.929 | 35.544 | O |
| ATOM | 4424 | H1 | HOH A | 2 | 59.687 | 30.401 | 35.872 | H |
| ATOM | 4425 | H2 | HOH A | 3 | 61.272 | 30.408 | 35.867 | H |
| ATOM | 4426 | O  | HOH A | 1 | 60.468 | 30.029 | 57.674 | O |
| ATOM | 4427 | H1 | HOH A | 2 | 59.678 | 30.504 | 58.006 | H |
| ATOM | 4428 | H2 | HOH A | 3 | 61.263 | 30.506 | 57.993 | H |
| ATOM | 4429 | O  | HOH A | 1 | 19.819 | 29.959 | 13.495 | O |
| ATOM | 4430 | H1 | HOH A | 2 | 19.025 | 30.439 | 13.813 | H |

|      |      |    |       |   |        |        |        |   |
|------|------|----|-------|---|--------|--------|--------|---|
| ATOM | 4431 | H2 | HOH A | 3 | 20.611 | 30.439 | 13.816 | H |
| ATOM | 4432 | O  | HOH A | 1 | 19.788 | 29.897 | 35.632 | O |
| ATOM | 4433 | H1 | HOH A | 2 | 19.000 | 30.386 | 35.950 | H |
| ATOM | 4434 | H2 | HOH A | 3 | 20.586 | 30.373 | 35.947 | H |
| ATOM | 4435 | O  | HOH A | 1 | 19.824 | 30.008 | 57.728 | O |
| ATOM | 4436 | H1 | HOH A | 2 | 19.029 | 30.491 | 58.037 | H |
| ATOM | 4437 | H2 | HOH A | 3 | 20.615 | 30.493 | 58.044 | H |
| ATOM | 4438 | O  | HOH A | 1 | 42.397 | 30.074 | 13.431 | O |
| ATOM | 4439 | H1 | HOH A | 2 | 41.609 | 30.557 | 13.755 | H |
| ATOM | 4440 | H2 | HOH A | 3 | 43.194 | 30.552 | 13.740 | H |
| ATOM | 4441 | O  | HOH A | 1 | 42.451 | 29.889 | 35.557 | O |
| ATOM | 4442 | H1 | HOH A | 2 | 41.659 | 30.369 | 35.876 | H |
| ATOM | 4443 | H2 | HOH A | 3 | 43.245 | 30.369 | 35.873 | H |
| ATOM | 4444 | O  | HOH A | 1 | 42.410 | 30.110 | 57.673 | O |
| ATOM | 4445 | H1 | HOH A | 2 | 41.624 | 30.601 | 57.992 | H |
| ATOM | 4446 | H2 | HOH A | 3 | 43.210 | 30.587 | 57.978 | H |
| ATOM | 4447 | O  | HOH A | 1 | 65.022 | 29.907 | 13.436 | O |
| ATOM | 4448 | H1 | HOH A | 2 | 64.233 | 30.399 | 13.748 | H |
| ATOM | 4449 | H2 | HOH A | 3 | 65.819 | 30.382 | 13.753 | H |
| ATOM | 4450 | O  | HOH A | 1 | 65.006 | 29.915 | 35.573 | O |
| ATOM | 4451 | H1 | HOH A | 2 | 64.215 | 30.400 | 35.889 | H |
| ATOM | 4452 | H2 | HOH A | 3 | 65.801 | 30.394 | 35.889 | H |
| ATOM | 4453 | O  | HOH A | 1 | 64.990 | 30.007 | 57.725 | O |
| ATOM | 4454 | H1 | HOH A | 2 | 64.208 | 30.508 | 58.037 | H |
| ATOM | 4455 | H2 | HOH A | 3 | 65.793 | 30.478 | 58.031 | H |
| ATOM | 4456 | O  | HOH A | 1 | 22.066 | 33.936 | 13.463 | O |
| ATOM | 4457 | H1 | HOH A | 2 | 22.081 | 33.013 | 13.791 | H |
| ATOM | 4458 | H2 | HOH A | 3 | 22.869 | 34.389 | 13.794 | H |
| ATOM | 4459 | O  | HOH A | 1 | 22.038 | 33.870 | 35.584 | O |
| ATOM | 4460 | H1 | HOH A | 2 | 22.056 | 32.947 | 35.911 | H |
| ATOM | 4461 | H2 | HOH A | 3 | 22.844 | 34.323 | 35.910 | H |
| ATOM | 4462 | O  | HOH A | 1 | 22.074 | 33.990 | 57.677 | O |
| ATOM | 4463 | H1 | HOH A | 2 | 22.087 | 33.066 | 58.003 | H |
| ATOM | 4464 | H2 | HOH A | 3 | 22.874 | 34.443 | 58.016 | H |
| ATOM | 4465 | O  | HOH A | 1 | 44.654 | 34.030 | 13.381 | O |
| ATOM | 4466 | H1 | HOH A | 2 | 44.671 | 33.105 | 13.702 | H |



|      |      |    |       |   |        |        |        |   |
|------|------|----|-------|---|--------|--------|--------|---|
| ATOM | 4467 | H2 | HOH A | 3 | 45.457 | 34.481 | 13.716 | H |
| ATOM | 4468 | O  | HOH A | 1 | 44.696 | 33.860 | 35.501 | O |
| ATOM | 4469 | H1 | HOH A | 2 | 44.719 | 32.936 | 35.828 | H |
| ATOM | 4470 | H2 | HOH A | 3 | 45.497 | 34.317 | 35.831 | H |
| ATOM | 4471 | O  | HOH A | 1 | 44.658 | 34.058 | 57.619 | O |
| ATOM | 4472 | H1 | HOH A | 2 | 44.681 | 33.134 | 57.946 | H |
| ATOM | 4473 | H2 | HOH A | 3 | 45.461 | 34.515 | 57.945 | H |
| ATOM | 4474 | O  | HOH A | 1 | 67.268 | 33.853 | 13.396 | O |
| ATOM | 4475 | H1 | HOH A | 2 | 67.291 | 32.932 | 13.729 | H |
| ATOM | 4476 | H2 | HOH A | 3 | 68.069 | 34.313 | 13.725 | H |
| ATOM | 4477 | O  | HOH A | 1 | 67.240 | 33.891 | 35.544 | O |
| ATOM | 4478 | H1 | HOH A | 2 | 67.253 | 32.967 | 35.869 | H |
| ATOM | 4479 | H2 | HOH A | 3 | 68.042 | 34.342 | 35.881 | H |
| ATOM | 4480 | O  | HOH A | 1 | 67.252 | 33.951 | 57.665 | O |
| ATOM | 4481 | H1 | HOH A | 2 | 67.272 | 33.029 | 57.996 | H |
| ATOM | 4482 | H2 | HOH A | 3 | 68.052 | 34.409 | 57.997 | H |
| ATOM | 4483 | O  | HOH A | 1 | 3.999  | 33.816 | 13.457 | O |
| ATOM | 4484 | H1 | HOH A | 2 | 3.991  | 32.889 | 13.773 | H |
| ATOM | 4485 | H2 | HOH A | 3 | 3.990  | 33.802 | 12.477 | H |
| ATOM | 4486 | O  | HOH A | 1 | 3.964  | 33.856 | 35.596 | O |
| ATOM | 4487 | H1 | HOH A | 2 | 3.963  | 32.927 | 35.908 | H |
| ATOM | 4488 | H2 | HOH A | 3 | 3.953  | 33.846 | 34.616 | H |
| ATOM | 4489 | O  | HOH A | 1 | 3.965  | 33.915 | 57.723 | O |
| ATOM | 4490 | H1 | HOH A | 2 | 3.957  | 32.984 | 58.030 | H |
| ATOM | 4491 | H2 | HOH A | 3 | 3.952  | 33.911 | 56.743 | H |
| ATOM | 4492 | O  | HOH A | 1 | 26.565 | 33.950 | 13.481 | O |
| ATOM | 4493 | H1 | HOH A | 2 | 26.565 | 33.019 | 13.786 | H |
| ATOM | 4494 | H2 | HOH A | 3 | 26.549 | 33.949 | 12.501 | H |
| ATOM | 4495 | O  | HOH A | 1 | 26.572 | 33.845 | 35.618 | O |
| ATOM | 4496 | H1 | HOH A | 2 | 26.565 | 32.914 | 35.923 | H |
| ATOM | 4497 | H2 | HOH A | 3 | 26.564 | 33.843 | 34.638 | H |
| ATOM | 4498 | O  | HOH A | 1 | 26.573 | 33.988 | 57.700 | O |
| ATOM | 4499 | H1 | HOH A | 2 | 26.564 | 33.059 | 58.012 | H |
| ATOM | 4500 | H2 | HOH A | 3 | 26.561 | 33.979 | 56.721 | H |
| ATOM | 4501 | O  | HOH A | 1 | 49.174 | 33.971 | 13.405 | O |
| ATOM | 4502 | H1 | HOH A | 2 | 49.166 | 33.037 | 13.701 | H |

|      |      |    |       |   |        |        |        |   |
|------|------|----|-------|---|--------|--------|--------|---|
| ATOM | 4503 | H2 | HOH A | 3 | 49.155 | 33.978 | 12.425 | H |
| ATOM | 4504 | O  | HOH A | 1 | 49.198 | 33.854 | 35.538 | O |
| ATOM | 4505 | H1 | HOH A | 2 | 49.196 | 32.925 | 35.851 | H |
| ATOM | 4506 | H2 | HOH A | 3 | 49.188 | 33.843 | 34.558 | H |
| ATOM | 4507 | O  | HOH A | 1 | 49.167 | 34.027 | 57.657 | O |
| ATOM | 4508 | H1 | HOH A | 2 | 49.159 | 33.095 | 57.960 | H |
| ATOM | 4509 | H2 | HOH A | 3 | 49.151 | 34.026 | 56.677 | H |
| ATOM | 4510 | O  | HOH A | 1 | 8.531  | 33.825 | 13.435 | O |
| ATOM | 4511 | H1 | HOH A | 2 | 8.518  | 32.909 | 13.784 | H |
| ATOM | 4512 | H2 | HOH A | 3 | 7.718  | 34.277 | 13.742 | H |
| ATOM | 4513 | O  | HOH A | 1 | 8.482  | 33.867 | 35.576 | O |
| ATOM | 4514 | H1 | HOH A | 2 | 8.467  | 32.951 | 35.925 | H |
| ATOM | 4515 | H2 | HOH A | 3 | 7.671  | 34.322 | 35.885 | H |
| ATOM | 4516 | O  | HOH A | 1 | 8.496  | 33.912 | 57.669 | O |
| ATOM | 4517 | H1 | HOH A | 2 | 8.484  | 32.995 | 58.013 | H |
| ATOM | 4518 | H2 | HOH A | 3 | 7.690  | 34.368 | 57.992 | H |
| ATOM | 4519 | O  | HOH A | 1 | 31.099 | 33.989 | 13.428 | O |
| ATOM | 4520 | H1 | HOH A | 2 | 31.093 | 33.070 | 13.767 | H |
| ATOM | 4521 | H2 | HOH A | 3 | 30.290 | 34.437 | 13.751 | H |
| ATOM | 4522 | O  | HOH A | 1 | 31.126 | 33.828 | 35.541 | O |
| ATOM | 4523 | H1 | HOH A | 2 | 31.115 | 32.909 | 35.881 | H |
| ATOM | 4524 | H2 | HOH A | 3 | 30.321 | 34.281 | 35.867 | H |
| ATOM | 4525 | O  | HOH A | 1 | 31.112 | 34.019 | 57.647 | O |
| ATOM | 4526 | H1 | HOH A | 2 | 31.101 | 33.103 | 57.996 | H |
| ATOM | 4527 | H2 | HOH A | 3 | 30.301 | 34.472 | 57.959 | H |
| ATOM | 4528 | O  | HOH A | 1 | 53.721 | 33.931 | 13.350 | O |
| ATOM | 4529 | H1 | HOH A | 2 | 53.712 | 33.014 | 13.696 | H |
| ATOM | 4530 | H2 | HOH A | 3 | 52.914 | 34.384 | 13.674 | H |
| ATOM | 4531 | O  | HOH A | 1 | 53.734 | 33.853 | 35.495 | O |
| ATOM | 4532 | H1 | HOH A | 2 | 53.721 | 32.940 | 35.850 | H |
| ATOM | 4533 | H2 | HOH A | 3 | 52.924 | 34.310 | 35.804 | H |
| ATOM | 4534 | O  | HOH A | 1 | 53.703 | 34.005 | 57.631 | O |
| ATOM | 4535 | H1 | HOH A | 2 | 53.690 | 33.086 | 57.972 | H |
| ATOM | 4536 | H2 | HOH A | 3 | 52.893 | 34.457 | 57.947 | H |
| ATOM | 4537 | O  | HOH A | 1 | 13.023 | 33.846 | 13.469 | O |
| ATOM | 4538 | H1 | HOH A | 2 | 13.011 | 32.918 | 13.784 | H |

|      |      |    |       |   |        |        |        |   |
|------|------|----|-------|---|--------|--------|--------|---|
| ATOM | 4539 | H2 | HOH A | 3 | 12.217 | 34.290 | 13.805 | H |
| ATOM | 4540 | O  | HOH A | 1 | 12.972 | 33.874 | 35.617 | O |
| ATOM | 4541 | H1 | HOH A | 2 | 12.949 | 32.950 | 35.943 | H |
| ATOM | 4542 | H2 | HOH A | 3 | 12.171 | 34.332 | 35.947 | H |
| ATOM | 4543 | O  | HOH A | 1 | 13.006 | 33.919 | 57.700 | O |
| ATOM | 4544 | H1 | HOH A | 2 | 12.994 | 32.995 | 58.026 | H |
| ATOM | 4545 | H2 | HOH A | 3 | 12.203 | 34.368 | 58.037 | H |
| ATOM | 4546 | O  | HOH A | 1 | 35.594 | 34.030 | 13.435 | O |
| ATOM | 4547 | H1 | HOH A | 2 | 35.583 | 33.107 | 13.764 | H |
| ATOM | 4548 | H2 | HOH A | 3 | 34.792 | 34.481 | 13.773 | H |
| ATOM | 4549 | O  | HOH A | 1 | 35.626 | 33.847 | 35.556 | O |
| ATOM | 4550 | H1 | HOH A | 2 | 35.610 | 32.922 | 35.879 | H |
| ATOM | 4551 | H2 | HOH A | 3 | 34.827 | 34.301 | 35.898 | H |
| ATOM | 4552 | O  | HOH A | 1 | 35.607 | 34.055 | 57.666 | O |
| ATOM | 4553 | H1 | HOH A | 2 | 35.596 | 33.133 | 57.997 | H |
| ATOM | 4554 | H2 | HOH A | 3 | 34.808 | 34.509 | 58.007 | H |
| ATOM | 4555 | O  | HOH A | 1 | 58.209 | 33.906 | 13.398 | O |
| ATOM | 4556 | H1 | HOH A | 2 | 58.188 | 32.982 | 13.721 | H |
| ATOM | 4557 | H2 | HOH A | 3 | 57.411 | 34.364 | 13.737 | H |
| ATOM | 4558 | O  | HOH A | 1 | 58.208 | 33.872 | 35.538 | O |
| ATOM | 4559 | H1 | HOH A | 2 | 58.196 | 32.949 | 35.868 | H |
| ATOM | 4560 | H2 | HOH A | 3 | 57.411 | 34.327 | 35.881 | H |
| ATOM | 4561 | O  | HOH A | 1 | 58.196 | 33.990 | 57.676 | O |
| ATOM | 4562 | H1 | HOH A | 2 | 58.185 | 33.071 | 58.015 | H |
| ATOM | 4563 | H2 | HOH A | 3 | 57.397 | 34.447 | 58.012 | H |
| ATOM | 4564 | O  | HOH A | 1 | 17.558 | 33.858 | 13.468 | O |
| ATOM | 4565 | H1 | HOH A | 2 | 16.751 | 34.314 | 13.787 | H |
| ATOM | 4566 | H2 | HOH A | 3 | 18.336 | 34.345 | 13.811 | H |
| ATOM | 4567 | O  | HOH A | 1 | 17.521 | 33.837 | 35.583 | O |
| ATOM | 4568 | H1 | HOH A | 2 | 16.721 | 34.303 | 35.907 | H |
| ATOM | 4569 | H2 | HOH A | 3 | 18.307 | 34.320 | 35.914 | H |
| ATOM | 4570 | O  | HOH A | 1 | 17.557 | 33.916 | 57.680 | O |
| ATOM | 4571 | H1 | HOH A | 2 | 16.756 | 34.379 | 58.002 | H |
| ATOM | 4572 | H2 | HOH A | 3 | 18.341 | 34.397 | 58.018 | H |
| ATOM | 4573 | O  | HOH A | 1 | 40.127 | 34.005 | 13.396 | O |
| ATOM | 4574 | H1 | HOH A | 2 | 39.330 | 34.480 | 13.713 | H |

|      |      |    |       |   |        |        |        |   |
|------|------|----|-------|---|--------|--------|--------|---|
| ATOM | 4575 | H2 | HOH A | 3 | 40.916 | 34.479 | 13.733 | H |
| ATOM | 4576 | O  | HOH A | 1 | 40.174 | 33.806 | 35.519 | O |
| ATOM | 4577 | H1 | HOH A | 2 | 39.376 | 34.275 | 35.841 | H |
| ATOM | 4578 | H2 | HOH A | 3 | 40.961 | 34.282 | 35.855 | H |
| ATOM | 4579 | O  | HOH A | 1 | 40.144 | 34.019 | 57.629 | O |
| ATOM | 4580 | H1 | HOH A | 2 | 39.348 | 34.490 | 57.954 | H |
| ATOM | 4581 | H2 | HOH A | 3 | 40.934 | 34.494 | 57.960 | H |
| ATOM | 4582 | O  | HOH A | 1 | 62.748 | 33.823 | 13.377 | O |
| ATOM | 4583 | H1 | HOH A | 2 | 61.951 | 34.294 | 13.699 | H |
| ATOM | 4584 | H2 | HOH A | 3 | 63.537 | 34.294 | 13.719 | H |
| ATOM | 4585 | O  | HOH A | 1 | 62.731 | 33.824 | 35.515 | O |
| ATOM | 4586 | H1 | HOH A | 2 | 61.928 | 34.291 | 35.827 | H |
| ATOM | 4587 | H2 | HOH A | 3 | 63.513 | 34.302 | 35.863 | H |
| ATOM | 4588 | O  | HOH A | 1 | 62.730 | 33.929 | 57.655 | O |
| ATOM | 4589 | H1 | HOH A | 2 | 61.930 | 34.400 | 57.970 | H |
| ATOM | 4590 | H2 | HOH A | 3 | 63.515 | 34.401 | 58.002 | H |
| ATOM | 4591 | O  | HOH A | 1 | 1.736  | 37.751 | 13.423 | O |
| ATOM | 4592 | H1 | HOH A | 2 | 2.536  | 38.215 | 13.749 | H |
| ATOM | 4593 | H2 | HOH A | 3 | 1.754  | 37.766 | 12.444 | H |
| ATOM | 4594 | O  | HOH A | 1 | 1.712  | 37.780 | 35.572 | O |
| ATOM | 4595 | H1 | HOH A | 2 | 2.513  | 38.245 | 35.893 | H |
| ATOM | 4596 | H2 | HOH A | 3 | 1.726  | 37.794 | 34.592 | H |
| ATOM | 4597 | O  | HOH A | 1 | 1.704  | 37.848 | 57.700 | O |
| ATOM | 4598 | H1 | HOH A | 2 | 2.515  | 38.302 | 58.013 | H |
| ATOM | 4599 | H2 | HOH A | 3 | 1.710  | 37.860 | 56.720 | H |
| ATOM | 4600 | O  | HOH A | 1 | 24.305 | 37.865 | 13.470 | O |
| ATOM | 4601 | H1 | HOH A | 2 | 25.104 | 38.332 | 13.792 | H |
| ATOM | 4602 | H2 | HOH A | 3 | 24.317 | 37.885 | 12.490 | H |
| ATOM | 4603 | O  | HOH A | 1 | 24.313 | 37.763 | 35.596 | O |
| ATOM | 4604 | H1 | HOH A | 2 | 25.116 | 38.222 | 35.919 | H |
| ATOM | 4605 | H2 | HOH A | 3 | 24.329 | 37.778 | 34.616 | H |
| ATOM | 4606 | O  | HOH A | 1 | 24.339 | 37.900 | 57.688 | O |
| ATOM | 4607 | H1 | HOH A | 2 | 25.142 | 38.363 | 58.005 | H |
| ATOM | 4608 | H2 | HOH A | 3 | 24.355 | 37.903 | 56.708 | H |
| ATOM | 4609 | O  | HOH A | 1 | 46.909 | 37.914 | 13.385 | O |
| ATOM | 4610 | H1 | HOH A | 2 | 47.715 | 38.369 | 13.708 | H |

|      |      |    |       |   |        |        |        |   |
|------|------|----|-------|---|--------|--------|--------|---|
| ATOM | 4611 | H2 | HOH A | 3 | 46.919 | 37.938 | 12.406 | H |
| ATOM | 4612 | O  | HOH A | 1 | 46.960 | 37.764 | 35.499 | O |
| ATOM | 4613 | H1 | HOH A | 2 | 47.766 | 38.218 | 35.821 | H |
| ATOM | 4614 | H2 | HOH A | 3 | 46.977 | 37.774 | 34.520 | H |
| ATOM | 4615 | O  | HOH A | 1 | 46.924 | 37.957 | 57.630 | O |
| ATOM | 4616 | H1 | HOH A | 2 | 47.729 | 38.416 | 57.950 | H |
| ATOM | 4617 | H2 | HOH A | 3 | 46.943 | 37.962 | 56.650 | H |
| ATOM | 4618 | O  | HOH A | 1 | 6.255  | 37.731 | 13.441 | O |
| ATOM | 4619 | H1 | HOH A | 2 | 7.051  | 38.196 | 13.771 | H |
| ATOM | 4620 | H2 | HOH A | 3 | 6.275  | 37.754 | 12.461 | H |
| ATOM | 4621 | O  | HOH A | 1 | 6.225  | 37.777 | 35.592 | O |
| ATOM | 4622 | H1 | HOH A | 2 | 7.024  | 38.245 | 35.914 | H |
| ATOM | 4623 | H2 | HOH A | 3 | 6.239  | 37.792 | 34.612 | H |
| ATOM | 4624 | O  | HOH A | 1 | 6.244  | 37.828 | 57.708 | O |
| ATOM | 4625 | H1 | HOH A | 2 | 7.045  | 38.286 | 58.038 | H |
| ATOM | 4626 | H2 | HOH A | 3 | 6.265  | 37.849 | 56.728 | H |
| ATOM | 4627 | O  | HOH A | 1 | 28.833 | 37.887 | 13.456 | O |
| ATOM | 4628 | H1 | HOH A | 2 | 29.630 | 38.349 | 13.789 | H |
| ATOM | 4629 | H2 | HOH A | 3 | 28.851 | 37.919 | 12.476 | H |
| ATOM | 4630 | O  | HOH A | 1 | 28.862 | 37.747 | 35.586 | O |
| ATOM | 4631 | H1 | HOH A | 2 | 29.661 | 38.210 | 35.912 | H |
| ATOM | 4632 | H2 | HOH A | 3 | 28.873 | 37.776 | 34.606 | H |
| ATOM | 4633 | O  | HOH A | 1 | 28.869 | 37.908 | 57.680 | O |
| ATOM | 4634 | H1 | HOH A | 2 | 29.669 | 38.373 | 58.002 | H |
| ATOM | 4635 | H2 | HOH A | 3 | 28.880 | 37.928 | 56.700 | H |
| ATOM | 4636 | O  | HOH A | 1 | 51.441 | 37.869 | 13.371 | O |
| ATOM | 4637 | H1 | HOH A | 2 | 52.241 | 38.329 | 13.698 | H |
| ATOM | 4638 | H2 | HOH A | 3 | 51.453 | 37.899 | 12.391 | H |
| ATOM | 4639 | O  | HOH A | 1 | 51.487 | 37.766 | 35.508 | O |
| ATOM | 4640 | H1 | HOH A | 2 | 52.287 | 38.227 | 35.837 | H |
| ATOM | 4641 | H2 | HOH A | 3 | 51.510 | 37.783 | 34.528 | H |
| ATOM | 4642 | O  | HOH A | 1 | 51.454 | 37.925 | 57.645 | O |
| ATOM | 4643 | H1 | HOH A | 2 | 52.254 | 38.383 | 57.977 | H |
| ATOM | 4644 | H2 | HOH A | 3 | 51.480 | 37.943 | 56.665 | H |
| ATOM | 4645 | O  | HOH A | 1 | 10.776 | 37.761 | 13.458 | O |
| ATOM | 4646 | H1 | HOH A | 2 | 10.765 | 36.838 | 13.785 | H |

|      |      |    |       |   |        |        |        |   |
|------|------|----|-------|---|--------|--------|--------|---|
| ATOM | 4647 | H2 | HOH A | 3 | 10.798 | 37.736 | 12.479 | H |
| ATOM | 4648 | O  | HOH A | 1 | 10.735 | 37.810 | 35.599 | O |
| ATOM | 4649 | H1 | HOH A | 2 | 10.716 | 36.887 | 35.927 | H |
| ATOM | 4650 | H2 | HOH A | 3 | 10.754 | 37.783 | 34.619 | H |
| ATOM | 4651 | O  | HOH A | 1 | 10.761 | 37.841 | 57.699 | O |
| ATOM | 4652 | H1 | HOH A | 2 | 10.754 | 36.918 | 58.028 | H |
| ATOM | 4653 | H2 | HOH A | 3 | 10.770 | 37.813 | 56.720 | H |
| ATOM | 4654 | O  | HOH A | 1 | 33.351 | 37.954 | 13.436 | O |
| ATOM | 4655 | H1 | HOH A | 2 | 33.332 | 37.031 | 13.762 | H |
| ATOM | 4656 | H2 | HOH A | 3 | 33.365 | 37.929 | 12.456 | H |
| ATOM | 4657 | O  | HOH A | 1 | 33.390 | 37.782 | 35.546 | O |
| ATOM | 4658 | H1 | HOH A | 2 | 33.382 | 36.854 | 35.861 | H |
| ATOM | 4659 | H2 | HOH A | 3 | 33.402 | 37.769 | 34.566 | H |
| ATOM | 4660 | O  | HOH A | 1 | 33.386 | 37.959 | 57.664 | O |
| ATOM | 4661 | H1 | HOH A | 2 | 33.357 | 37.038 | 57.996 | H |
| ATOM | 4662 | H2 | HOH A | 3 | 33.410 | 37.927 | 56.685 | H |
| ATOM | 4663 | O  | HOH A | 1 | 55.965 | 37.861 | 13.370 | O |
| ATOM | 4664 | H1 | HOH A | 2 | 55.956 | 36.940 | 13.704 | H |
| ATOM | 4665 | H2 | HOH A | 3 | 55.972 | 37.828 | 12.390 | H |
| ATOM | 4666 | O  | HOH A | 1 | 55.992 | 37.799 | 35.507 | O |
| ATOM | 4667 | H1 | HOH A | 2 | 55.972 | 36.877 | 35.840 | H |
| ATOM | 4668 | H2 | HOH A | 3 | 56.016 | 37.767 | 34.528 | H |
| ATOM | 4669 | O  | HOH A | 1 | 55.963 | 37.934 | 57.662 | O |
| ATOM | 4670 | H1 | HOH A | 2 | 55.942 | 37.010 | 57.990 | H |
| ATOM | 4671 | H2 | HOH A | 3 | 55.974 | 37.908 | 56.683 | H |
| ATOM | 4672 | O  | HOH A | 1 | 15.299 | 37.747 | 13.471 | O |
| ATOM | 4673 | H1 | HOH A | 2 | 14.502 | 38.211 | 13.802 | H |
| ATOM | 4674 | H2 | HOH A | 3 | 16.088 | 38.228 | 13.799 | H |
| ATOM | 4675 | O  | HOH A | 1 | 15.272 | 37.746 | 35.618 | O |
| ATOM | 4676 | H1 | HOH A | 2 | 14.483 | 38.222 | 35.951 | H |
| ATOM | 4677 | H2 | HOH A | 3 | 16.069 | 38.217 | 35.941 | H |
| ATOM | 4678 | O  | HOH A | 1 | 15.294 | 37.818 | 57.696 | O |
| ATOM | 4679 | H1 | HOH A | 2 | 14.507 | 38.296 | 58.030 | H |
| ATOM | 4680 | H2 | HOH A | 3 | 16.092 | 38.285 | 58.019 | H |
| ATOM | 4681 | O  | HOH A | 1 | 37.891 | 37.929 | 13.423 | O |
| ATOM | 4682 | H1 | HOH A | 2 | 37.103 | 38.403 | 13.763 | H |

|      |      |    |       |   |        |        |        |   |
|------|------|----|-------|---|--------|--------|--------|---|
| ATOM | 4683 | H2 | HOH A | 3 | 38.689 | 38.393 | 13.752 | H |
| ATOM | 4684 | O  | HOH A | 1 | 37.935 | 37.721 | 35.541 | O |
| ATOM | 4685 | H1 | HOH A | 2 | 37.147 | 38.199 | 35.874 | H |
| ATOM | 4686 | H2 | HOH A | 3 | 38.733 | 38.190 | 35.864 | H |
| ATOM | 4687 | O  | HOH A | 1 | 37.903 | 37.929 | 57.645 | O |
| ATOM | 4688 | H1 | HOH A | 2 | 37.114 | 38.401 | 57.983 | H |
| ATOM | 4689 | H2 | HOH A | 3 | 38.699 | 38.400 | 57.966 | H |
| ATOM | 4690 | O  | HOH A | 1 | 60.510 | 37.768 | 13.410 | O |
| ATOM | 4691 | H1 | HOH A | 2 | 59.716 | 38.241 | 13.737 | H |
| ATOM | 4692 | H2 | HOH A | 3 | 61.302 | 38.242 | 13.739 | H |
| ATOM | 4693 | O  | HOH A | 1 | 60.508 | 37.742 | 35.540 | O |
| ATOM | 4694 | H1 | HOH A | 2 | 59.718 | 38.221 | 35.866 | H |
| ATOM | 4695 | H2 | HOH A | 3 | 61.304 | 38.210 | 35.870 | H |
| ATOM | 4696 | O  | HOH A | 1 | 60.492 | 37.859 | 57.676 | O |
| ATOM | 4697 | H1 | HOH A | 2 | 59.705 | 38.340 | 58.007 | H |
| ATOM | 4698 | H2 | HOH A | 3 | 61.290 | 38.324 | 58.002 | H |
| ATOM | 4699 | O  | HOH A | 1 | 19.810 | 37.830 | 13.440 | O |
| ATOM | 4700 | H1 | HOH A | 2 | 19.830 | 36.911 | 13.779 | H |
| ATOM | 4701 | H2 | HOH A | 3 | 20.604 | 38.294 | 13.777 | H |
| ATOM | 4702 | O  | HOH A | 1 | 19.784 | 37.788 | 35.563 | O |
| ATOM | 4703 | H1 | HOH A | 2 | 19.798 | 36.864 | 35.889 | H |
| ATOM | 4704 | H2 | HOH A | 3 | 20.589 | 38.239 | 35.894 | H |
| ATOM | 4705 | O  | HOH A | 1 | 19.824 | 37.868 | 57.658 | O |
| ATOM | 4706 | H1 | HOH A | 2 | 19.843 | 36.947 | 57.991 | H |
| ATOM | 4707 | H2 | HOH A | 3 | 20.617 | 38.331 | 57.999 | H |
| ATOM | 4708 | O  | HOH A | 1 | 42.392 | 37.943 | 13.374 | O |
| ATOM | 4709 | H1 | HOH A | 2 | 42.405 | 37.020 | 13.701 | H |
| ATOM | 4710 | H2 | HOH A | 3 | 43.193 | 38.395 | 13.713 | H |
| ATOM | 4711 | O  | HOH A | 1 | 42.452 | 37.764 | 35.479 | O |
| ATOM | 4712 | H1 | HOH A | 2 | 42.473 | 36.841 | 35.809 | H |
| ATOM | 4713 | H2 | HOH A | 3 | 43.247 | 38.226 | 35.817 | H |
| ATOM | 4714 | O  | HOH A | 1 | 42.420 | 37.968 | 57.610 | O |
| ATOM | 4715 | H1 | HOH A | 2 | 42.443 | 37.043 | 57.934 | H |
| ATOM | 4716 | H2 | HOH A | 3 | 43.219 | 38.426 | 57.946 | H |
| ATOM | 4717 | O  | HOH A | 1 | 65.017 | 37.782 | 13.389 | O |
| ATOM | 4718 | H1 | HOH A | 2 | 65.020 | 36.856 | 13.712 | H |

|      |      |    |       |   |        |        |        |   |
|------|------|----|-------|---|--------|--------|--------|---|
| ATOM | 4719 | H2 | HOH A | 3 | 65.824 | 38.222 | 13.729 | H |
| ATOM | 4720 | O  | HOH A | 1 | 65.002 | 37.793 | 35.512 | O |
| ATOM | 4721 | H1 | HOH A | 2 | 65.007 | 36.869 | 35.839 | H |
| ATOM | 4722 | H2 | HOH A | 3 | 65.801 | 38.242 | 35.860 | H |
| ATOM | 4723 | O  | HOH A | 1 | 65.006 | 37.865 | 57.654 | O |
| ATOM | 4724 | H1 | HOH A | 2 | 65.014 | 36.941 | 57.982 | H |
| ATOM | 4725 | H2 | HOH A | 3 | 65.806 | 38.315 | 57.998 | H |
| ATOM | 4726 | O  | HOH A | 1 | 22.037 | 41.761 | 13.463 | O |
| ATOM | 4727 | H1 | HOH A | 2 | 21.233 | 42.223 | 13.780 | H |
| ATOM | 4728 | H2 | HOH A | 3 | 22.033 | 41.783 | 12.484 | H |
| ATOM | 4729 | O  | HOH A | 1 | 22.026 | 41.684 | 35.588 | O |
| ATOM | 4730 | H1 | HOH A | 2 | 21.230 | 42.156 | 35.913 | H |
| ATOM | 4731 | H2 | HOH A | 3 | 22.010 | 41.703 | 34.608 | H |
| ATOM | 4732 | O  | HOH A | 1 | 22.052 | 41.798 | 57.700 | O |
| ATOM | 4733 | H1 | HOH A | 2 | 21.247 | 42.262 | 58.012 | H |
| ATOM | 4734 | H2 | HOH A | 3 | 22.046 | 41.807 | 56.720 | H |
| ATOM | 4735 | O  | HOH A | 1 | 44.630 | 41.830 | 13.403 | O |
| ATOM | 4736 | H1 | HOH A | 2 | 43.844 | 42.313 | 13.731 | H |
| ATOM | 4737 | H2 | HOH A | 3 | 44.619 | 41.862 | 12.424 | H |
| ATOM | 4738 | O  | HOH A | 1 | 44.672 | 41.670 | 35.509 | O |
| ATOM | 4739 | H1 | HOH A | 2 | 43.871 | 42.141 | 35.819 | H |
| ATOM | 4740 | H2 | HOH A | 3 | 44.675 | 41.690 | 34.529 | H |
| ATOM | 4741 | O  | HOH A | 1 | 44.650 | 41.874 | 57.640 | O |
| ATOM | 4742 | H1 | HOH A | 2 | 43.853 | 42.347 | 57.960 | H |
| ATOM | 4743 | H2 | HOH A | 3 | 44.639 | 41.890 | 56.661 | H |
| ATOM | 4744 | O  | HOH A | 1 | 67.253 | 41.675 | 13.420 | O |
| ATOM | 4745 | H1 | HOH A | 2 | 66.462 | 42.157 | 13.741 | H |
| ATOM | 4746 | H2 | HOH A | 3 | 67.242 | 41.693 | 12.440 | H |
| ATOM | 4747 | O  | HOH A | 1 | 67.239 | 41.693 | 35.556 | O |
| ATOM | 4748 | H1 | HOH A | 2 | 66.446 | 42.175 | 35.872 | H |
| ATOM | 4749 | H2 | HOH A | 3 | 67.226 | 41.700 | 34.577 | H |
| ATOM | 4750 | O  | HOH A | 1 | 67.224 | 41.751 | 57.699 | O |
| ATOM | 4751 | H1 | HOH A | 2 | 66.429 | 42.229 | 58.016 | H |
| ATOM | 4752 | H2 | HOH A | 3 | 67.220 | 41.773 | 56.719 | H |
| ATOM | 4753 | O  | HOH A | 1 | 4.007  | 41.627 | 13.404 | O |
| ATOM | 4754 | H1 | HOH A | 2 | 3.209  | 42.096 | 13.726 | H |



|      |      |    |       |   |        |        |        |   |
|------|------|----|-------|---|--------|--------|--------|---|
| ATOM | 4755 | H2 | HOH A | 3 | 4.794  | 42.100 | 13.744 | H |
| ATOM | 4756 | O  | HOH A | 1 | 3.984  | 41.679 | 35.554 | O |
| ATOM | 4757 | H1 | HOH A | 2 | 3.182  | 42.147 | 35.868 | H |
| ATOM | 4758 | H2 | HOH A | 3 | 4.768  | 42.158 | 35.897 | H |
| ATOM | 4759 | O  | HOH A | 1 | 3.975  | 41.719 | 57.680 | O |
| ATOM | 4760 | H1 | HOH A | 2 | 3.176  | 42.190 | 57.997 | H |
| ATOM | 4761 | H2 | HOH A | 3 | 4.761  | 42.192 | 58.023 | H |
| ATOM | 4762 | O  | HOH A | 1 | 26.583 | 41.770 | 13.433 | O |
| ATOM | 4763 | H1 | HOH A | 2 | 25.780 | 42.232 | 13.752 | H |
| ATOM | 4764 | H2 | HOH A | 3 | 27.366 | 42.245 | 13.781 | H |
| ATOM | 4765 | O  | HOH A | 1 | 26.595 | 41.638 | 35.551 | O |
| ATOM | 4766 | H1 | HOH A | 2 | 25.793 | 42.104 | 35.868 | H |
| ATOM | 4767 | H2 | HOH A | 3 | 27.378 | 42.119 | 35.891 | H |
| ATOM | 4768 | O  | HOH A | 1 | 26.602 | 41.792 | 57.655 | O |
| ATOM | 4769 | H1 | HOH A | 2 | 25.804 | 42.259 | 57.979 | H |
| ATOM | 4770 | H2 | HOH A | 3 | 27.390 | 42.270 | 57.989 | H |
| ATOM | 4771 | O  | HOH A | 1 | 49.181 | 41.775 | 13.351 | O |
| ATOM | 4772 | H1 | HOH A | 2 | 48.383 | 42.243 | 13.675 | H |
| ATOM | 4773 | H2 | HOH A | 3 | 49.969 | 42.248 | 13.692 | H |
| ATOM | 4774 | O  | HOH A | 1 | 49.220 | 41.651 | 35.482 | O |
| ATOM | 4775 | H1 | HOH A | 2 | 48.414 | 42.113 | 35.796 | H |
| ATOM | 4776 | H2 | HOH A | 3 | 50.000 | 42.134 | 35.827 | H |
| ATOM | 4777 | O  | HOH A | 1 | 49.190 | 41.830 | 57.620 | O |
| ATOM | 4778 | H1 | HOH A | 2 | 48.389 | 42.299 | 57.934 | H |
| ATOM | 4779 | H2 | HOH A | 3 | 49.974 | 42.308 | 57.960 | H |
| ATOM | 4780 | O  | HOH A | 1 | 8.523  | 41.670 | 13.468 | O |
| ATOM | 4781 | H1 | HOH A | 2 | 8.528  | 40.746 | 13.793 | H |
| ATOM | 4782 | H2 | HOH A | 3 | 8.534  | 41.647 | 12.488 | H |
| ATOM | 4783 | O  | HOH A | 1 | 8.471  | 41.719 | 35.608 | O |
| ATOM | 4784 | H1 | HOH A | 2 | 8.477  | 40.793 | 35.927 | H |
| ATOM | 4785 | H2 | HOH A | 3 | 8.479  | 41.702 | 34.628 | H |
| ATOM | 4786 | O  | HOH A | 1 | 8.492  | 41.760 | 57.731 | O |
| ATOM | 4787 | H1 | HOH A | 2 | 8.499  | 40.836 | 58.058 | H |
| ATOM | 4788 | H2 | HOH A | 3 | 8.496  | 41.734 | 56.751 | H |
| ATOM | 4789 | O  | HOH A | 1 | 31.092 | 41.841 | 13.473 | O |
| ATOM | 4790 | H1 | HOH A | 2 | 31.101 | 40.912 | 13.787 | H |

|      |      |    |       |   |        |        |        |   |
|------|------|----|-------|---|--------|--------|--------|---|
| ATOM | 4791 | H2 | HOH A | 3 | 31.102 | 41.829 | 12.493 | H |
| ATOM | 4792 | O  | HOH A | 1 | 31.112 | 41.688 | 35.588 | O |
| ATOM | 4793 | H1 | HOH A | 2 | 31.126 | 40.762 | 35.907 | H |
| ATOM | 4794 | H2 | HOH A | 3 | 31.116 | 41.671 | 34.608 | H |
| ATOM | 4795 | O  | HOH A | 1 | 31.114 | 41.863 | 57.681 | O |
| ATOM | 4796 | H1 | HOH A | 2 | 31.128 | 40.941 | 58.011 | H |
| ATOM | 4797 | H2 | HOH A | 3 | 31.115 | 41.834 | 56.701 | H |
| ATOM | 4798 | O  | HOH A | 1 | 53.699 | 41.791 | 13.398 | O |
| ATOM | 4799 | H1 | HOH A | 2 | 53.704 | 40.865 | 13.719 | H |
| ATOM | 4800 | H2 | HOH A | 3 | 53.711 | 41.771 | 12.418 | H |
| ATOM | 4801 | O  | HOH A | 1 | 53.725 | 41.714 | 35.537 | O |
| ATOM | 4802 | H1 | HOH A | 2 | 53.739 | 40.788 | 35.856 | H |
| ATOM | 4803 | H2 | HOH A | 3 | 53.733 | 41.697 | 34.557 | H |
| ATOM | 4804 | O  | HOH A | 1 | 53.696 | 41.852 | 57.671 | O |
| ATOM | 4805 | H1 | HOH A | 2 | 53.702 | 40.928 | 57.996 | H |
| ATOM | 4806 | H2 | HOH A | 3 | 53.697 | 41.829 | 56.691 | H |
| ATOM | 4807 | O  | HOH A | 1 | 13.034 | 41.684 | 13.511 | O |
| ATOM | 4808 | H1 | HOH A | 2 | 13.026 | 40.753 | 13.817 | H |
| ATOM | 4809 | H2 | HOH A | 3 | 13.032 | 41.681 | 12.531 | H |
| ATOM | 4810 | O  | HOH A | 1 | 12.997 | 41.696 | 35.648 | O |
| ATOM | 4811 | H1 | HOH A | 2 | 12.993 | 40.766 | 35.954 | H |
| ATOM | 4812 | H2 | HOH A | 3 | 12.999 | 41.693 | 34.668 | H |
| ATOM | 4813 | O  | HOH A | 1 | 13.012 | 41.766 | 57.743 | O |
| ATOM | 4814 | H1 | HOH A | 2 | 13.009 | 40.833 | 58.042 | H |
| ATOM | 4815 | H2 | HOH A | 3 | 13.005 | 41.769 | 56.763 | H |
| ATOM | 4816 | O  | HOH A | 1 | 35.607 | 41.867 | 13.483 | O |
| ATOM | 4817 | H1 | HOH A | 2 | 35.597 | 40.935 | 13.784 | H |
| ATOM | 4818 | H2 | HOH A | 3 | 35.614 | 41.869 | 12.503 | H |
| ATOM | 4819 | O  | HOH A | 1 | 35.647 | 41.678 | 35.594 | O |
| ATOM | 4820 | H1 | HOH A | 2 | 35.646 | 40.745 | 35.893 | H |
| ATOM | 4821 | H2 | HOH A | 3 | 35.648 | 41.682 | 34.614 | H |
| ATOM | 4822 | O  | HOH A | 1 | 35.626 | 41.884 | 57.687 | O |
| ATOM | 4823 | H1 | HOH A | 2 | 35.620 | 40.955 | 57.997 | H |
| ATOM | 4824 | H2 | HOH A | 3 | 35.620 | 41.877 | 56.707 | H |
| ATOM | 4825 | O  | HOH A | 1 | 58.228 | 41.735 | 13.431 | O |
| ATOM | 4826 | H1 | HOH A | 2 | 58.218 | 40.804 | 13.739 | H |

|      |      |    |       |   |        |        |        |   |
|------|------|----|-------|---|--------|--------|--------|---|
| ATOM | 4827 | H2 | HOH A | 3 | 58.230 | 41.730 | 12.451 | H |
| ATOM | 4828 | O  | HOH A | 1 | 58.235 | 41.719 | 35.568 | O |
| ATOM | 4829 | H1 | HOH A | 2 | 58.233 | 40.787 | 35.872 | H |
| ATOM | 4830 | H2 | HOH A | 3 | 58.237 | 41.717 | 34.588 | H |
| ATOM | 4831 | O  | HOH A | 1 | 58.220 | 41.831 | 57.695 | O |
| ATOM | 4832 | H1 | HOH A | 2 | 58.208 | 40.901 | 58.003 | H |
| ATOM | 4833 | H2 | HOH A | 3 | 58.224 | 41.827 | 56.715 | H |
| ATOM | 4834 | O  | HOH A | 1 | 17.551 | 41.700 | 13.479 | O |
| ATOM | 4835 | H1 | HOH A | 2 | 16.747 | 42.164 | 13.793 | H |
| ATOM | 4836 | H2 | HOH A | 3 | 17.548 | 41.718 | 12.500 | H |
| ATOM | 4837 | O  | HOH A | 1 | 17.528 | 41.676 | 35.625 | O |
| ATOM | 4838 | H1 | HOH A | 2 | 16.723 | 42.143 | 35.932 | H |
| ATOM | 4839 | H2 | HOH A | 3 | 17.525 | 41.682 | 34.645 | H |
| ATOM | 4840 | O  | HOH A | 1 | 17.560 | 41.734 | 57.726 | O |
| ATOM | 4841 | H1 | HOH A | 2 | 16.746 | 42.193 | 58.024 | H |
| ATOM | 4842 | H2 | HOH A | 3 | 17.568 | 41.739 | 56.746 | H |
| ATOM | 4843 | O  | HOH A | 1 | 40.141 | 41.828 | 13.442 | O |
| ATOM | 4844 | H1 | HOH A | 2 | 39.337 | 42.290 | 13.759 | H |
| ATOM | 4845 | H2 | HOH A | 3 | 40.137 | 41.849 | 12.462 | H |
| ATOM | 4846 | O  | HOH A | 1 | 40.184 | 41.630 | 35.546 | O |
| ATOM | 4847 | H1 | HOH A | 2 | 39.381 | 42.094 | 35.861 | H |
| ATOM | 4848 | H2 | HOH A | 3 | 40.176 | 41.643 | 34.566 | H |
| ATOM | 4849 | O  | HOH A | 1 | 40.161 | 41.848 | 57.675 | O |
| ATOM | 4850 | H1 | HOH A | 2 | 39.354 | 42.310 | 57.985 | H |
| ATOM | 4851 | H2 | HOH A | 3 | 40.155 | 41.851 | 56.695 | H |
| ATOM | 4852 | O  | HOH A | 1 | 62.759 | 41.686 | 13.436 | O |
| ATOM | 4853 | H1 | HOH A | 2 | 61.955 | 42.151 | 13.749 | H |
| ATOM | 4854 | H2 | HOH A | 3 | 62.753 | 41.698 | 12.456 | H |
| ATOM | 4855 | O  | HOH A | 1 | 62.762 | 41.674 | 35.554 | O |
| ATOM | 4856 | H1 | HOH A | 2 | 61.959 | 42.147 | 35.859 | H |
| ATOM | 4857 | H2 | HOH A | 3 | 62.765 | 41.682 | 34.574 | H |
| ATOM | 4858 | O  | HOH A | 1 | 62.740 | 41.752 | 57.710 | O |
| ATOM | 4859 | H1 | HOH A | 2 | 61.935 | 42.219 | 58.018 | H |
| ATOM | 4860 | H2 | HOH A | 3 | 62.742 | 41.766 | 56.730 | H |
| ATOM | 4861 | O  | HOH A | 1 | 1.763  | 45.609 | 10.658 | O |
| ATOM | 4862 | H1 | HOH A | 2 | 1.750  | 44.689 | 10.322 | H |

|      |      |    |       |   |        |        |        |   |
|------|------|----|-------|---|--------|--------|--------|---|
| ATOM | 4863 | H2 | HOH A | 3 | 0.958  | 46.063 | 10.330 | H |
| ATOM | 4864 | O  | HOH A | 1 | 1.746  | 45.617 | 32.815 | O |
| ATOM | 4865 | H1 | HOH A | 2 | 1.732  | 44.696 | 32.480 | H |
| ATOM | 4866 | H2 | HOH A | 3 | 0.946  | 46.073 | 32.480 | H |
| ATOM | 4867 | O  | HOH A | 1 | 1.733  | 45.674 | 54.941 | O |
| ATOM | 4868 | H1 | HOH A | 2 | 1.719  | 44.755 | 54.599 | H |
| ATOM | 4869 | H2 | HOH A | 3 | 0.932  | 46.132 | 54.609 | H |
| ATOM | 4870 | O  | HOH A | 1 | 24.356 | 45.726 | 10.684 | O |
| ATOM | 4871 | H1 | HOH A | 2 | 24.339 | 44.803 | 10.354 | H |
| ATOM | 4872 | H2 | HOH A | 3 | 23.554 | 46.181 | 10.351 | H |
| ATOM | 4873 | O  | HOH A | 1 | 24.350 | 45.613 | 32.823 | O |
| ATOM | 4874 | H1 | HOH A | 2 | 24.326 | 44.693 | 32.486 | H |
| ATOM | 4875 | H2 | HOH A | 3 | 23.548 | 46.074 | 32.500 | H |
| ATOM | 4876 | O  | HOH A | 1 | 24.361 | 45.709 | 54.917 | O |
| ATOM | 4877 | H1 | HOH A | 2 | 24.343 | 44.789 | 54.580 | H |
| ATOM | 4878 | H2 | HOH A | 3 | 23.557 | 46.166 | 54.593 | H |
| ATOM | 4879 | O  | HOH A | 1 | 46.946 | 45.774 | 10.620 | O |
| ATOM | 4880 | H1 | HOH A | 2 | 46.923 | 44.856 | 10.278 | H |
| ATOM | 4881 | H2 | HOH A | 3 | 46.149 | 46.240 | 10.292 | H |
| ATOM | 4882 | O  | HOH A | 1 | 46.984 | 45.603 | 32.743 | O |
| ATOM | 4883 | H1 | HOH A | 2 | 46.965 | 44.683 | 32.408 | H |
| ATOM | 4884 | H2 | HOH A | 3 | 46.179 | 46.060 | 32.421 | H |
| ATOM | 4885 | O  | HOH A | 1 | 46.951 | 45.775 | 54.881 | O |
| ATOM | 4886 | H1 | HOH A | 2 | 46.935 | 44.854 | 54.545 | H |
| ATOM | 4887 | H2 | HOH A | 3 | 46.149 | 46.232 | 54.551 | H |
| ATOM | 4888 | O  | HOH A | 1 | 6.251  | 45.571 | 10.679 | O |
| ATOM | 4889 | H1 | HOH A | 2 | 5.459  | 46.046 | 10.350 | H |
| ATOM | 4890 | H2 | HOH A | 3 | 7.045  | 46.047 | 10.356 | H |
| ATOM | 4891 | O  | HOH A | 1 | 6.217  | 45.608 | 32.819 | O |
| ATOM | 4892 | H1 | HOH A | 2 | 5.427  | 46.085 | 32.488 | H |
| ATOM | 4893 | H2 | HOH A | 3 | 7.013  | 46.078 | 32.496 | H |
| ATOM | 4894 | O  | HOH A | 1 | 6.224  | 45.654 | 54.942 | O |
| ATOM | 4895 | H1 | HOH A | 2 | 5.433  | 46.127 | 54.610 | H |
| ATOM | 4896 | H2 | HOH A | 3 | 7.018  | 46.129 | 54.618 | H |
| ATOM | 4897 | O  | HOH A | 1 | 28.835 | 45.754 | 10.686 | O |
| ATOM | 4898 | H1 | HOH A | 2 | 28.042 | 46.227 | 10.356 | H |

|      |      |    |       |   |        |        |        |   |
|------|------|----|-------|---|--------|--------|--------|---|
| ATOM | 4899 | H2 | HOH A | 3 | 29.628 | 46.226 | 10.356 | H |
| ATOM | 4900 | O  | HOH A | 1 | 28.839 | 45.588 | 32.811 | O |
| ATOM | 4901 | H1 | HOH A | 2 | 28.051 | 46.067 | 32.480 | H |
| ATOM | 4902 | H2 | HOH A | 3 | 29.636 | 46.056 | 32.487 | H |
| ATOM | 4903 | O  | HOH A | 1 | 28.840 | 45.718 | 54.902 | O |
| ATOM | 4904 | H1 | HOH A | 2 | 28.046 | 46.184 | 54.566 | H |
| ATOM | 4905 | H2 | HOH A | 3 | 29.631 | 46.193 | 54.572 | H |
| ATOM | 4906 | O  | HOH A | 1 | 51.435 | 45.737 | 10.609 | O |
| ATOM | 4907 | H1 | HOH A | 2 | 50.650 | 46.221 | 10.276 | H |
| ATOM | 4908 | H2 | HOH A | 3 | 52.236 | 46.199 | 10.284 | H |
| ATOM | 4909 | O  | HOH A | 1 | 51.465 | 45.609 | 32.741 | O |
| ATOM | 4910 | H1 | HOH A | 2 | 50.676 | 46.083 | 32.404 | H |
| ATOM | 4911 | H2 | HOH A | 3 | 52.261 | 46.082 | 32.421 | H |
| ATOM | 4912 | O  | HOH A | 1 | 51.440 | 45.735 | 54.884 | O |
| ATOM | 4913 | H1 | HOH A | 2 | 50.650 | 46.215 | 54.557 | H |
| ATOM | 4914 | H2 | HOH A | 3 | 52.236 | 46.198 | 54.550 | H |
| ATOM | 4915 | O  | HOH A | 1 | 10.796 | 45.575 | 10.670 | O |
| ATOM | 4916 | H1 | HOH A | 2 | 9.993  | 46.037 | 10.350 | H |
| ATOM | 4917 | H2 | HOH A | 3 | 11.578 | 46.068 | 10.348 | H |
| ATOM | 4918 | O  | HOH A | 1 | 10.779 | 45.594 | 32.823 | O |
| ATOM | 4919 | H1 | HOH A | 2 | 9.979  | 46.056 | 32.495 | H |
| ATOM | 4920 | H2 | HOH A | 3 | 11.565 | 46.086 | 32.505 | H |
| ATOM | 4921 | O  | HOH A | 1 | 10.782 | 45.664 | 54.945 | O |
| ATOM | 4922 | H1 | HOH A | 2 | 9.986  | 46.133 | 54.619 | H |
| ATOM | 4923 | H2 | HOH A | 3 | 11.572 | 46.143 | 54.618 | H |
| ATOM | 4924 | O  | HOH A | 1 | 33.394 | 45.776 | 10.658 | O |
| ATOM | 4925 | H1 | HOH A | 2 | 32.593 | 46.243 | 10.341 | H |
| ATOM | 4926 | H2 | HOH A | 3 | 34.179 | 46.268 | 10.337 | H |
| ATOM | 4927 | O  | HOH A | 1 | 33.411 | 45.598 | 32.798 | O |
| ATOM | 4928 | H1 | HOH A | 2 | 32.609 | 46.066 | 32.485 | H |
| ATOM | 4929 | H2 | HOH A | 3 | 34.194 | 46.090 | 32.473 | H |
| ATOM | 4930 | O  | HOH A | 1 | 33.408 | 45.728 | 54.877 | O |
| ATOM | 4931 | H1 | HOH A | 2 | 32.605 | 46.195 | 54.563 | H |
| ATOM | 4932 | H2 | HOH A | 3 | 34.190 | 46.214 | 54.542 | H |
| ATOM | 4933 | O  | HOH A | 1 | 55.982 | 45.681 | 10.607 | O |
| ATOM | 4934 | H1 | HOH A | 2 | 55.191 | 46.161 | 10.284 | H |

|      |      |    |       |   |        |        |        |   |
|------|------|----|-------|---|--------|--------|--------|---|
| ATOM | 4935 | H2 | HOH A | 3 | 56.777 | 46.158 | 10.287 | H |
| ATOM | 4936 | O  | HOH A | 1 | 56.016 | 45.597 | 32.739 | O |
| ATOM | 4937 | H1 | HOH A | 2 | 55.218 | 46.064 | 32.415 | H |
| ATOM | 4938 | H2 | HOH A | 3 | 56.803 | 46.087 | 32.421 | H |
| ATOM | 4939 | O  | HOH A | 1 | 56.006 | 45.715 | 54.889 | O |
| ATOM | 4940 | H1 | HOH A | 2 | 55.211 | 46.185 | 54.563 | H |
| ATOM | 4941 | H2 | HOH A | 3 | 56.796 | 46.195 | 54.564 | H |
| ATOM | 4942 | O  | HOH A | 1 | 15.264 | 45.607 | 10.698 | O |
| ATOM | 4943 | H1 | HOH A | 2 | 16.071 | 46.068 | 10.389 | H |
| ATOM | 4944 | H2 | HOH A | 3 | 15.277 | 45.597 | 11.678 | H |
| ATOM | 4945 | O  | HOH A | 1 | 15.242 | 45.589 | 32.861 | O |
| ATOM | 4946 | H1 | HOH A | 2 | 16.052 | 46.041 | 32.546 | H |
| ATOM | 4947 | H2 | HOH A | 3 | 15.253 | 45.596 | 33.841 | H |
| ATOM | 4948 | O  | HOH A | 1 | 15.250 | 45.649 | 54.950 | O |
| ATOM | 4949 | H1 | HOH A | 2 | 16.055 | 46.107 | 54.631 | H |
| ATOM | 4950 | H2 | HOH A | 3 | 15.268 | 45.650 | 55.930 | H |
| ATOM | 4951 | O  | HOH A | 1 | 37.856 | 45.783 | 10.668 | O |
| ATOM | 4952 | H1 | HOH A | 2 | 38.664 | 46.236 | 10.349 | H |
| ATOM | 4953 | H2 | HOH A | 3 | 37.878 | 45.776 | 11.647 | H |
| ATOM | 4954 | O  | HOH A | 1 | 37.886 | 45.581 | 32.799 | O |
| ATOM | 4955 | H1 | HOH A | 2 | 38.695 | 46.036 | 32.486 | H |
| ATOM | 4956 | H2 | HOH A | 3 | 37.905 | 45.570 | 33.779 | H |
| ATOM | 4957 | O  | HOH A | 1 | 37.869 | 45.735 | 54.905 | O |
| ATOM | 4958 | H1 | HOH A | 2 | 38.679 | 46.185 | 54.587 | H |
| ATOM | 4959 | H2 | HOH A | 3 | 37.882 | 45.742 | 55.884 | H |
| ATOM | 4960 | O  | HOH A | 1 | 60.457 | 45.628 | 10.650 | O |
| ATOM | 4961 | H1 | HOH A | 2 | 61.272 | 46.074 | 10.336 | H |
| ATOM | 4962 | H2 | HOH A | 3 | 60.471 | 45.626 | 11.630 | H |
| ATOM | 4963 | O  | HOH A | 1 | 60.471 | 45.583 | 32.779 | O |
| ATOM | 4964 | H1 | HOH A | 2 | 61.282 | 46.035 | 32.466 | H |
| ATOM | 4965 | H2 | HOH A | 3 | 60.482 | 45.586 | 33.759 | H |
| ATOM | 4966 | O  | HOH A | 1 | 60.460 | 45.671 | 54.929 | O |
| ATOM | 4967 | H1 | HOH A | 2 | 61.274 | 46.122 | 54.623 | H |
| ATOM | 4968 | H2 | HOH A | 3 | 60.466 | 45.666 | 55.909 | H |
| ATOM | 4969 | O  | HOH A | 1 | 19.847 | 45.664 | 10.698 | O |
| ATOM | 4970 | H1 | HOH A | 2 | 19.038 | 46.105 | 10.364 | H |

|      |      |    |       |   |        |        |        |   |
|------|------|----|-------|---|--------|--------|--------|---|
| ATOM | 4971 | H2 | HOH A | 3 | 20.623 | 46.156 | 10.356 | H |
| ATOM | 4972 | O  | HOH A | 1 | 19.815 | 45.619 | 32.840 | O |
| ATOM | 4973 | H1 | HOH A | 2 | 19.011 | 46.071 | 32.508 | H |
| ATOM | 4974 | H2 | HOH A | 3 | 20.597 | 46.103 | 32.502 | H |
| ATOM | 4975 | O  | HOH A | 1 | 19.836 | 45.675 | 54.937 | O |
| ATOM | 4976 | H1 | HOH A | 2 | 19.034 | 46.128 | 54.602 | H |
| ATOM | 4977 | H2 | HOH A | 3 | 20.619 | 46.159 | 54.603 | H |
| ATOM | 4978 | O  | HOH A | 1 | 42.422 | 45.796 | 10.663 | O |
| ATOM | 4979 | H1 | HOH A | 2 | 41.623 | 46.257 | 10.332 | H |
| ATOM | 4980 | H2 | HOH A | 3 | 43.208 | 46.274 | 10.326 | H |
| ATOM | 4981 | O  | HOH A | 1 | 42.455 | 45.591 | 32.779 | O |
| ATOM | 4982 | H1 | HOH A | 2 | 41.653 | 46.049 | 32.450 | H |
| ATOM | 4983 | H2 | HOH A | 3 | 43.239 | 46.072 | 32.441 | H |
| ATOM | 4984 | O  | HOH A | 1 | 42.440 | 45.767 | 54.896 | O |
| ATOM | 4985 | H1 | HOH A | 2 | 41.639 | 46.224 | 54.563 | H |
| ATOM | 4986 | H2 | HOH A | 3 | 43.225 | 46.250 | 54.562 | H |
| ATOM | 4987 | O  | HOH A | 1 | 65.024 | 45.610 | 10.665 | O |
| ATOM | 4988 | H1 | HOH A | 2 | 64.223 | 46.062 | 10.328 | H |
| ATOM | 4989 | H2 | HOH A | 3 | 65.808 | 46.088 | 10.323 | H |
| ATOM | 4990 | O  | HOH A | 1 | 65.027 | 45.604 | 32.790 | O |
| ATOM | 4991 | H1 | HOH A | 2 | 64.230 | 46.060 | 32.448 | H |
| ATOM | 4992 | H2 | HOH A | 3 | 65.815 | 46.082 | 32.459 | H |
| ATOM | 4993 | O  | HOH A | 1 | 65.016 | 45.673 | 54.954 | O |
| ATOM | 4994 | H1 | HOH A | 2 | 64.215 | 46.130 | 54.621 | H |
| ATOM | 4995 | H2 | HOH A | 3 | 65.801 | 46.158 | 54.622 | H |
| ATOM | 4996 | O  | HOH A | 1 | 22.093 | 26.125 | 10.708 | O |
| ATOM | 4997 | H1 | HOH A | 2 | 21.280 | 26.579 | 10.402 | H |
| ATOM | 4998 | H2 | HOH A | 3 | 22.087 | 26.121 | 11.688 | H |
| ATOM | 4999 | O  | HOH A | 1 | 22.064 | 26.046 | 32.842 | O |
| ATOM | 5000 | H1 | HOH A | 2 | 21.258 | 26.513 | 32.537 | H |
| ATOM | 5001 | H2 | HOH A | 3 | 22.058 | 26.041 | 33.822 | H |
| ATOM | 5002 | O  | HOH A | 1 | 22.082 | 26.128 | 54.934 | O |
| ATOM | 5003 | H1 | HOH A | 2 | 21.269 | 26.579 | 54.625 | H |
| ATOM | 5004 | H2 | HOH A | 3 | 22.078 | 26.136 | 55.914 | H |
| ATOM | 5005 | O  | HOH A | 1 | 44.680 | 26.222 | 10.641 | O |
| ATOM | 5006 | H1 | HOH A | 2 | 43.873 | 26.690 | 10.342 | H |

|      |      |    |       |   |        |        |        |   |
|------|------|----|-------|---|--------|--------|--------|---|
| ATOM | 5007 | H2 | HOH A | 3 | 44.680 | 26.212 | 11.621 | H |
| ATOM | 5008 | O  | HOH A | 1 | 44.696 | 26.029 | 32.765 | O |
| ATOM | 5009 | H1 | HOH A | 2 | 43.882 | 26.485 | 32.467 | H |
| ATOM | 5010 | H2 | HOH A | 3 | 44.702 | 26.031 | 33.745 | H |
| ATOM | 5011 | O  | HOH A | 1 | 44.683 | 26.201 | 54.892 | O |
| ATOM | 5012 | H1 | HOH A | 2 | 43.876 | 26.665 | 54.586 | H |
| ATOM | 5013 | H2 | HOH A | 3 | 44.679 | 26.201 | 55.872 | H |
| ATOM | 5014 | O  | HOH A | 1 | 67.274 | 26.029 | 10.668 | O |
| ATOM | 5015 | H1 | HOH A | 2 | 66.466 | 26.491 | 10.362 | H |
| ATOM | 5016 | H2 | HOH A | 3 | 67.270 | 26.028 | 11.648 | H |
| ATOM | 5017 | O  | HOH A | 1 | 67.278 | 26.039 | 32.813 | O |
| ATOM | 5018 | H1 | HOH A | 2 | 66.472 | 26.497 | 32.494 | H |
| ATOM | 5019 | H2 | HOH A | 3 | 67.261 | 26.045 | 33.793 | H |
| ATOM | 5020 | O  | HOH A | 1 | 67.264 | 26.111 | 54.949 | O |
| ATOM | 5021 | H1 | HOH A | 2 | 66.458 | 26.576 | 54.642 | H |
| ATOM | 5022 | H2 | HOH A | 3 | 67.261 | 26.114 | 55.929 | H |
| ATOM | 5023 | O  | HOH A | 1 | 3.996  | 26.054 | 10.652 | O |
| ATOM | 5024 | H1 | HOH A | 2 | 4.011  | 25.133 | 10.318 | H |
| ATOM | 5025 | H2 | HOH A | 3 | 4.805  | 26.506 | 10.332 | H |
| ATOM | 5026 | O  | HOH A | 1 | 3.979  | 26.087 | 32.822 | O |
| ATOM | 5027 | H1 | HOH A | 2 | 3.995  | 25.167 | 32.485 | H |
| ATOM | 5028 | H2 | HOH A | 3 | 4.787  | 26.541 | 32.503 | H |
| ATOM | 5029 | O  | HOH A | 1 | 3.975  | 26.127 | 54.946 | O |
| ATOM | 5030 | H1 | HOH A | 2 | 3.986  | 25.203 | 54.620 | H |
| ATOM | 5031 | H2 | HOH A | 3 | 4.780  | 26.576 | 54.613 | H |
| ATOM | 5032 | O  | HOH A | 1 | 26.592 | 26.205 | 10.696 | O |
| ATOM | 5033 | H1 | HOH A | 2 | 26.601 | 25.284 | 10.360 | H |
| ATOM | 5034 | H2 | HOH A | 3 | 27.396 | 26.656 | 10.362 | H |
| ATOM | 5035 | O  | HOH A | 1 | 26.585 | 26.078 | 32.829 | O |
| ATOM | 5036 | H1 | HOH A | 2 | 26.591 | 25.157 | 32.494 | H |
| ATOM | 5037 | H2 | HOH A | 3 | 27.400 | 26.521 | 32.512 | H |
| ATOM | 5038 | O  | HOH A | 1 | 26.581 | 26.179 | 54.900 | O |
| ATOM | 5039 | H1 | HOH A | 2 | 26.597 | 25.256 | 54.571 | H |
| ATOM | 5040 | H2 | HOH A | 3 | 27.390 | 26.629 | 54.579 | H |
| ATOM | 5041 | O  | HOH A | 1 | 49.176 | 26.225 | 10.624 | O |
| ATOM | 5042 | H1 | HOH A | 2 | 49.180 | 25.304 | 10.291 | H |



|      |      |    |       |   |        |        |        |   |
|------|------|----|-------|---|--------|--------|--------|---|
| ATOM | 5043 | H2 | HOH A | 3 | 49.989 | 26.668 | 10.302 | H |
| ATOM | 5044 | O  | HOH A | 1 | 49.210 | 26.070 | 32.750 | O |
| ATOM | 5045 | H1 | HOH A | 2 | 49.215 | 25.151 | 32.409 | H |
| ATOM | 5046 | H2 | HOH A | 3 | 50.020 | 26.517 | 32.427 | H |
| ATOM | 5047 | O  | HOH A | 1 | 49.194 | 26.222 | 54.890 | O |
| ATOM | 5048 | H1 | HOH A | 2 | 49.198 | 25.300 | 54.559 | H |
| ATOM | 5049 | H2 | HOH A | 3 | 50.006 | 26.664 | 54.565 | H |
| ATOM | 5050 | O  | HOH A | 1 | 8.556  | 25.989 | 10.678 | O |
| ATOM | 5051 | H1 | HOH A | 2 | 7.758  | 26.458 | 10.358 | H |
| ATOM | 5052 | H2 | HOH A | 3 | 8.542  | 26.002 | 11.658 | H |
| ATOM | 5053 | O  | HOH A | 1 | 8.514  | 26.011 | 32.835 | O |
| ATOM | 5054 | H1 | HOH A | 2 | 7.721  | 26.490 | 32.516 | H |
| ATOM | 5055 | H2 | HOH A | 3 | 8.496  | 26.015 | 33.815 | H |
| ATOM | 5056 | O  | HOH A | 1 | 8.501  | 26.076 | 54.958 | O |
| ATOM | 5057 | H1 | HOH A | 2 | 7.708  | 26.556 | 54.639 | H |
| ATOM | 5058 | H2 | HOH A | 3 | 8.486  | 26.083 | 55.937 | H |
| ATOM | 5059 | O  | HOH A | 1 | 31.126 | 26.182 | 10.684 | O |
| ATOM | 5060 | H1 | HOH A | 2 | 30.328 | 26.657 | 10.371 | H |
| ATOM | 5061 | H2 | HOH A | 3 | 31.111 | 26.177 | 11.663 | H |
| ATOM | 5062 | O  | HOH A | 1 | 31.131 | 26.006 | 32.829 | O |
| ATOM | 5063 | H1 | HOH A | 2 | 30.338 | 26.489 | 32.516 | H |
| ATOM | 5064 | H2 | HOH A | 3 | 31.125 | 26.017 | 33.809 | H |
| ATOM | 5065 | O  | HOH A | 1 | 31.146 | 26.134 | 54.908 | O |
| ATOM | 5066 | H1 | HOH A | 2 | 30.344 | 26.601 | 54.593 | H |
| ATOM | 5067 | H2 | HOH A | 3 | 31.141 | 26.149 | 55.888 | H |
| ATOM | 5068 | O  | HOH A | 1 | 53.716 | 26.121 | 10.619 | O |
| ATOM | 5069 | H1 | HOH A | 2 | 52.918 | 26.602 | 10.315 | H |
| ATOM | 5070 | H2 | HOH A | 3 | 53.709 | 26.111 | 11.599 | H |
| ATOM | 5071 | O  | HOH A | 1 | 53.747 | 26.008 | 32.767 | O |
| ATOM | 5072 | H1 | HOH A | 2 | 52.949 | 26.479 | 32.448 | H |
| ATOM | 5073 | H2 | HOH A | 3 | 53.729 | 26.011 | 33.747 | H |
| ATOM | 5074 | O  | HOH A | 1 | 53.728 | 26.137 | 54.898 | O |
| ATOM | 5075 | H1 | HOH A | 2 | 52.939 | 26.621 | 54.576 | H |
| ATOM | 5076 | H2 | HOH A | 3 | 53.709 | 26.146 | 55.878 | H |
| ATOM | 5077 | O  | HOH A | 1 | 13.084 | 26.051 | 10.699 | O |
| ATOM | 5078 | H1 | HOH A | 2 | 13.078 | 25.130 | 10.362 | H |

|      |      |    |       |   |        |        |        |   |
|------|------|----|-------|---|--------|--------|--------|---|
| ATOM | 5079 | H2 | HOH A | 3 | 13.064 | 26.014 | 11.678 | H |
| ATOM | 5080 | O  | HOH A | 1 | 13.048 | 26.061 | 32.847 | O |
| ATOM | 5081 | H1 | HOH A | 2 | 13.051 | 25.139 | 32.516 | H |
| ATOM | 5082 | H2 | HOH A | 3 | 13.028 | 26.031 | 33.827 | H |
| ATOM | 5083 | O  | HOH A | 1 | 13.060 | 26.113 | 54.957 | O |
| ATOM | 5084 | H1 | HOH A | 2 | 13.055 | 25.192 | 54.621 | H |
| ATOM | 5085 | H2 | HOH A | 3 | 13.056 | 26.078 | 55.936 | H |
| ATOM | 5086 | O  | HOH A | 1 | 35.664 | 26.237 | 10.701 | O |
| ATOM | 5087 | H1 | HOH A | 2 | 35.665 | 25.319 | 10.359 | H |
| ATOM | 5088 | H2 | HOH A | 3 | 35.646 | 26.196 | 11.680 | H |
| ATOM | 5089 | O  | HOH A | 1 | 35.690 | 26.050 | 32.819 | O |
| ATOM | 5090 | H1 | HOH A | 2 | 35.692 | 25.128 | 32.486 | H |
| ATOM | 5091 | H2 | HOH A | 3 | 35.677 | 26.019 | 33.798 | H |
| ATOM | 5092 | O  | HOH A | 1 | 35.689 | 26.192 | 54.896 | O |
| ATOM | 5093 | H1 | HOH A | 2 | 35.684 | 25.268 | 54.570 | H |
| ATOM | 5094 | H2 | HOH A | 3 | 35.676 | 26.167 | 55.876 | H |
| ATOM | 5095 | O  | HOH A | 1 | 58.255 | 26.117 | 10.628 | O |
| ATOM | 5096 | H1 | HOH A | 2 | 58.262 | 25.197 | 10.291 | H |
| ATOM | 5097 | H2 | HOH A | 3 | 58.238 | 26.081 | 11.607 | H |
| ATOM | 5098 | O  | HOH A | 1 | 58.283 | 26.058 | 32.770 | O |
| ATOM | 5099 | H1 | HOH A | 2 | 58.283 | 25.135 | 32.443 | H |
| ATOM | 5100 | H2 | HOH A | 3 | 58.267 | 26.033 | 33.750 | H |
| ATOM | 5101 | O  | HOH A | 1 | 58.265 | 26.161 | 54.919 | O |
| ATOM | 5102 | H1 | HOH A | 2 | 58.269 | 25.239 | 54.588 | H |
| ATOM | 5103 | H2 | HOH A | 3 | 58.241 | 26.131 | 55.899 | H |
| ATOM | 5104 | O  | HOH A | 1 | 17.590 | 26.020 | 10.687 | O |
| ATOM | 5105 | H1 | HOH A | 2 | 16.790 | 26.485 | 10.366 | H |
| ATOM | 5106 | H2 | HOH A | 3 | 17.575 | 26.030 | 11.666 | H |
| ATOM | 5107 | O  | HOH A | 1 | 17.550 | 26.001 | 32.837 | O |
| ATOM | 5108 | H1 | HOH A | 2 | 16.752 | 26.473 | 32.521 | H |
| ATOM | 5109 | H2 | HOH A | 3 | 17.543 | 26.016 | 33.817 | H |
| ATOM | 5110 | O  | HOH A | 1 | 17.570 | 26.058 | 54.928 | O |
| ATOM | 5111 | H1 | HOH A | 2 | 16.768 | 26.525 | 54.611 | H |
| ATOM | 5112 | H2 | HOH A | 3 | 17.563 | 26.075 | 55.907 | H |
| ATOM | 5113 | O  | HOH A | 1 | 40.166 | 26.185 | 10.650 | O |
| ATOM | 5114 | H1 | HOH A | 2 | 39.365 | 26.654 | 10.333 | H |

|      |      |    |       |   |        |        |        |   |
|------|------|----|-------|---|--------|--------|--------|---|
| ATOM | 5115 | H2 | HOH A | 3 | 40.157 | 26.199 | 11.630 | H |
| ATOM | 5116 | O  | HOH A | 1 | 40.199 | 25.988 | 32.784 | O |
| ATOM | 5117 | H1 | HOH A | 2 | 39.397 | 26.452 | 32.464 | H |
| ATOM | 5118 | H2 | HOH A | 3 | 40.187 | 26.004 | 33.764 | H |
| ATOM | 5119 | O  | HOH A | 1 | 40.176 | 26.143 | 54.880 | O |
| ATOM | 5120 | H1 | HOH A | 2 | 39.377 | 26.612 | 54.561 | H |
| ATOM | 5121 | H2 | HOH A | 3 | 40.168 | 26.164 | 55.859 | H |
| ATOM | 5122 | O  | HOH A | 1 | 62.762 | 25.998 | 10.628 | O |
| ATOM | 5123 | H1 | HOH A | 2 | 61.968 | 26.472 | 10.305 | H |
| ATOM | 5124 | H2 | HOH A | 3 | 62.747 | 26.013 | 11.607 | H |
| ATOM | 5125 | O  | HOH A | 1 | 62.769 | 25.987 | 32.772 | O |
| ATOM | 5126 | H1 | HOH A | 2 | 61.972 | 26.463 | 32.457 | H |
| ATOM | 5127 | H2 | HOH A | 3 | 62.765 | 26.005 | 33.752 | H |
| ATOM | 5128 | O  | HOH A | 1 | 62.761 | 26.071 | 54.922 | O |
| ATOM | 5129 | H1 | HOH A | 2 | 61.968 | 26.547 | 54.600 | H |
| ATOM | 5130 | H2 | HOH A | 3 | 62.749 | 26.089 | 55.901 | H |
| ATOM | 5131 | O  | HOH A | 1 | 1.736  | 29.956 | 10.675 | O |
| ATOM | 5132 | H1 | HOH A | 2 | 1.714  | 29.034 | 10.345 | H |
| ATOM | 5133 | H2 | HOH A | 3 | 0.940  | 30.418 | 10.336 | H |
| ATOM | 5134 | O  | HOH A | 1 | 1.724  | 29.988 | 32.810 | O |
| ATOM | 5135 | H1 | HOH A | 2 | 1.709  | 29.064 | 32.484 | H |
| ATOM | 5136 | H2 | HOH A | 3 | 0.926  | 30.443 | 32.469 | H |
| ATOM | 5137 | O  | HOH A | 1 | 1.717  | 30.034 | 54.951 | O |
| ATOM | 5138 | H1 | HOH A | 2 | 1.699  | 29.112 | 54.619 | H |
| ATOM | 5139 | H2 | HOH A | 3 | 0.921  | 30.494 | 54.611 | H |
| ATOM | 5140 | O  | HOH A | 1 | 24.339 | 30.089 | 10.709 | O |
| ATOM | 5141 | H1 | HOH A | 2 | 24.328 | 29.165 | 10.382 | H |
| ATOM | 5142 | H2 | HOH A | 3 | 23.536 | 30.539 | 10.374 | H |
| ATOM | 5143 | O  | HOH A | 1 | 24.341 | 29.978 | 32.846 | O |
| ATOM | 5144 | H1 | HOH A | 2 | 24.325 | 29.055 | 32.516 | H |
| ATOM | 5145 | H2 | HOH A | 3 | 23.539 | 30.432 | 32.513 | H |
| ATOM | 5146 | O  | HOH A | 1 | 24.343 | 30.079 | 54.945 | O |
| ATOM | 5147 | H1 | HOH A | 2 | 24.324 | 29.153 | 54.623 | H |
| ATOM | 5148 | H2 | HOH A | 3 | 23.542 | 30.533 | 54.610 | H |
| ATOM | 5149 | O  | HOH A | 1 | 46.930 | 30.153 | 10.624 | O |
| ATOM | 5150 | H1 | HOH A | 2 | 46.913 | 29.230 | 10.296 | H |

|      |      |    |       |   |        |        |        |   |
|------|------|----|-------|---|--------|--------|--------|---|
| ATOM | 5151 | H2 | HOH A | 3 | 46.132 | 30.610 | 10.286 | H |
| ATOM | 5152 | O  | HOH A | 1 | 46.966 | 29.974 | 32.762 | O |
| ATOM | 5153 | H1 | HOH A | 2 | 46.949 | 29.050 | 32.435 | H |
| ATOM | 5154 | H2 | HOH A | 3 | 46.168 | 30.430 | 32.422 | H |
| ATOM | 5155 | O  | HOH A | 1 | 46.939 | 30.138 | 54.893 | O |
| ATOM | 5156 | H1 | HOH A | 2 | 46.928 | 29.214 | 54.568 | H |
| ATOM | 5157 | H2 | HOH A | 3 | 46.138 | 30.588 | 54.553 | H |
| ATOM | 5158 | O  | HOH A | 1 | 6.286  | 29.912 | 10.692 | O |
| ATOM | 5159 | H1 | HOH A | 2 | 7.088  | 30.381 | 10.382 | H |
| ATOM | 5160 | H2 | HOH A | 3 | 6.295  | 29.909 | 11.672 | H |
| ATOM | 5161 | O  | HOH A | 1 | 6.255  | 29.944 | 32.834 | O |
| ATOM | 5162 | H1 | HOH A | 2 | 7.062  | 30.411 | 32.533 | H |
| ATOM | 5163 | H2 | HOH A | 3 | 6.253  | 29.945 | 33.814 | H |
| ATOM | 5164 | O  | HOH A | 1 | 6.250  | 30.009 | 54.958 | O |
| ATOM | 5165 | H1 | HOH A | 2 | 7.057  | 30.471 | 54.649 | H |
| ATOM | 5166 | H2 | HOH A | 3 | 6.257  | 30.009 | 55.938 | H |
| ATOM | 5167 | O  | HOH A | 1 | 28.872 | 30.095 | 10.697 | O |
| ATOM | 5168 | H1 | HOH A | 2 | 29.675 | 30.568 | 10.393 | H |
| ATOM | 5169 | H2 | HOH A | 3 | 28.873 | 30.096 | 11.677 | H |
| ATOM | 5170 | O  | HOH A | 1 | 28.882 | 29.953 | 32.850 | O |
| ATOM | 5171 | H1 | HOH A | 2 | 29.690 | 30.415 | 32.544 | H |
| ATOM | 5172 | H2 | HOH A | 3 | 28.884 | 29.956 | 33.830 | H |
| ATOM | 5173 | O  | HOH A | 1 | 28.887 | 30.060 | 54.932 | O |
| ATOM | 5174 | H1 | HOH A | 2 | 29.692 | 30.525 | 54.621 | H |
| ATOM | 5175 | H2 | HOH A | 3 | 28.885 | 30.081 | 55.911 | H |
| ATOM | 5176 | O  | HOH A | 1 | 51.463 | 30.069 | 10.637 | O |
| ATOM | 5177 | H1 | HOH A | 2 | 52.271 | 30.529 | 10.327 | H |
| ATOM | 5178 | H2 | HOH A | 3 | 51.471 | 30.070 | 11.616 | H |
| ATOM | 5179 | O  | HOH A | 1 | 51.518 | 29.946 | 32.767 | O |
| ATOM | 5180 | H1 | HOH A | 2 | 52.320 | 30.415 | 32.457 | H |
| ATOM | 5181 | H2 | HOH A | 3 | 51.521 | 29.955 | 33.747 | H |
| ATOM | 5182 | O  | HOH A | 1 | 51.477 | 30.086 | 54.897 | O |
| ATOM | 5183 | H1 | HOH A | 2 | 52.284 | 30.551 | 54.591 | H |
| ATOM | 5184 | H2 | HOH A | 3 | 51.477 | 30.093 | 55.877 | H |
| ATOM | 5185 | O  | HOH A | 1 | 10.801 | 29.913 | 10.734 | O |
| ATOM | 5186 | H1 | HOH A | 2 | 10.817 | 28.992 | 10.400 | H |

|      |      |    |       |   |        |        |        |   |
|------|------|----|-------|---|--------|--------|--------|---|
| ATOM | 5187 | H2 | HOH A | 3 | 11.601 | 30.370 | 10.401 | H |
| ATOM | 5188 | O  | HOH A | 1 | 10.749 | 29.937 | 32.875 | O |
| ATOM | 5189 | H1 | HOH A | 2 | 10.766 | 29.016 | 32.542 | H |
| ATOM | 5190 | H2 | HOH A | 3 | 11.551 | 30.394 | 32.545 | H |
| ATOM | 5191 | O  | HOH A | 1 | 10.758 | 29.993 | 54.989 | O |
| ATOM | 5192 | H1 | HOH A | 2 | 10.777 | 29.068 | 54.666 | H |
| ATOM | 5193 | H2 | HOH A | 3 | 11.560 | 30.446 | 54.655 | H |
| ATOM | 5194 | O  | HOH A | 1 | 33.379 | 30.112 | 10.717 | O |
| ATOM | 5195 | H1 | HOH A | 2 | 33.389 | 29.191 | 10.383 | H |
| ATOM | 5196 | H2 | HOH A | 3 | 34.179 | 30.566 | 10.377 | H |
| ATOM | 5197 | O  | HOH A | 1 | 33.393 | 29.925 | 32.851 | O |
| ATOM | 5198 | H1 | HOH A | 2 | 33.400 | 29.001 | 32.524 | H |
| ATOM | 5199 | H2 | HOH A | 3 | 34.194 | 30.374 | 32.509 | H |
| ATOM | 5200 | O  | HOH A | 1 | 33.398 | 30.061 | 54.937 | O |
| ATOM | 5201 | H1 | HOH A | 2 | 33.416 | 29.139 | 54.604 | H |
| ATOM | 5202 | H2 | HOH A | 3 | 34.193 | 30.521 | 54.597 | H |
| ATOM | 5203 | O  | HOH A | 1 | 55.964 | 30.013 | 10.657 | O |
| ATOM | 5204 | H1 | HOH A | 2 | 55.974 | 29.091 | 10.325 | H |
| ATOM | 5205 | H2 | HOH A | 3 | 56.762 | 30.467 | 10.315 | H |
| ATOM | 5206 | O  | HOH A | 1 | 55.991 | 29.929 | 32.805 | O |
| ATOM | 5207 | H1 | HOH A | 2 | 56.006 | 29.008 | 32.472 | H |
| ATOM | 5208 | H2 | HOH A | 3 | 56.793 | 30.384 | 32.474 | H |
| ATOM | 5209 | O  | HOH A | 1 | 55.972 | 30.047 | 54.945 | O |
| ATOM | 5210 | H1 | HOH A | 2 | 55.988 | 29.124 | 54.617 | H |
| ATOM | 5211 | H2 | HOH A | 3 | 56.773 | 30.501 | 54.611 | H |
| ATOM | 5212 | O  | HOH A | 1 | 15.323 | 29.970 | 10.691 | O |
| ATOM | 5213 | H1 | HOH A | 2 | 15.319 | 29.044 | 10.371 | H |
| ATOM | 5214 | H2 | HOH A | 3 | 15.312 | 29.951 | 11.671 | H |
| ATOM | 5215 | O  | HOH A | 1 | 15.263 | 29.964 | 32.846 | O |
| ATOM | 5216 | H1 | HOH A | 2 | 15.264 | 29.038 | 32.524 | H |
| ATOM | 5217 | H2 | HOH A | 3 | 15.265 | 29.944 | 33.826 | H |
| ATOM | 5218 | O  | HOH A | 1 | 15.296 | 30.016 | 54.924 | O |
| ATOM | 5219 | H1 | HOH A | 2 | 15.301 | 29.091 | 54.600 | H |
| ATOM | 5220 | H2 | HOH A | 3 | 15.298 | 29.994 | 55.904 | H |
| ATOM | 5221 | O  | HOH A | 1 | 37.890 | 30.148 | 10.653 | O |
| ATOM | 5222 | H1 | HOH A | 2 | 37.884 | 29.221 | 10.335 | H |

|      |      |    |       |   |        |        |        |   |
|------|------|----|-------|---|--------|--------|--------|---|
| ATOM | 5223 | H2 | HOH A | 3 | 37.886 | 30.132 | 11.633 | H |
| ATOM | 5224 | O  | HOH A | 1 | 37.928 | 29.947 | 32.775 | O |
| ATOM | 5225 | H1 | HOH A | 2 | 37.924 | 29.021 | 32.457 | H |
| ATOM | 5226 | H2 | HOH A | 3 | 37.920 | 29.931 | 33.755 | H |
| ATOM | 5227 | O  | HOH A | 1 | 37.905 | 30.112 | 54.873 | O |
| ATOM | 5228 | H1 | HOH A | 2 | 37.904 | 29.185 | 54.554 | H |
| ATOM | 5229 | H2 | HOH A | 3 | 37.897 | 30.095 | 55.853 | H |
| ATOM | 5230 | O  | HOH A | 1 | 60.483 | 30.001 | 10.617 | O |
| ATOM | 5231 | H1 | HOH A | 2 | 60.487 | 29.075 | 10.298 | H |
| ATOM | 5232 | H2 | HOH A | 3 | 60.484 | 29.984 | 11.597 | H |
| ATOM | 5233 | O  | HOH A | 1 | 60.509 | 29.946 | 32.765 | O |
| ATOM | 5234 | H1 | HOH A | 2 | 60.508 | 29.018 | 32.450 | H |
| ATOM | 5235 | H2 | HOH A | 3 | 60.504 | 29.933 | 33.744 | H |
| ATOM | 5236 | O  | HOH A | 1 | 60.482 | 30.056 | 54.894 | O |
| ATOM | 5237 | H1 | HOH A | 2 | 60.486 | 29.131 | 54.570 | H |
| ATOM | 5238 | H2 | HOH A | 3 | 60.477 | 30.034 | 55.874 | H |
| ATOM | 5239 | O  | HOH A | 1 | 19.834 | 29.996 | 10.716 | O |
| ATOM | 5240 | H1 | HOH A | 2 | 19.036 | 30.465 | 10.395 | H |
| ATOM | 5241 | H2 | HOH A | 3 | 19.811 | 29.992 | 11.696 | H |
| ATOM | 5242 | O  | HOH A | 1 | 19.795 | 29.943 | 32.859 | O |
| ATOM | 5243 | H1 | HOH A | 2 | 18.996 | 30.410 | 32.537 | H |
| ATOM | 5244 | H2 | HOH A | 3 | 19.773 | 29.943 | 33.838 | H |
| ATOM | 5245 | O  | HOH A | 1 | 19.822 | 30.013 | 54.947 | O |
| ATOM | 5246 | H1 | HOH A | 2 | 19.021 | 30.483 | 54.633 | H |
| ATOM | 5247 | H2 | HOH A | 3 | 19.809 | 30.015 | 55.927 | H |
| ATOM | 5248 | O  | HOH A | 1 | 42.409 | 30.132 | 10.649 | O |
| ATOM | 5249 | H1 | HOH A | 2 | 41.608 | 30.601 | 10.335 | H |
| ATOM | 5250 | H2 | HOH A | 3 | 42.393 | 30.130 | 11.629 | H |
| ATOM | 5251 | O  | HOH A | 1 | 42.467 | 29.928 | 32.779 | O |
| ATOM | 5252 | H1 | HOH A | 2 | 41.666 | 30.395 | 32.463 | H |
| ATOM | 5253 | H2 | HOH A | 3 | 42.451 | 29.925 | 33.759 | H |
| ATOM | 5254 | O  | HOH A | 1 | 42.421 | 30.096 | 54.894 | O |
| ATOM | 5255 | H1 | HOH A | 2 | 41.625 | 30.564 | 54.565 | H |
| ATOM | 5256 | H2 | HOH A | 3 | 42.396 | 30.110 | 55.874 | H |
| ATOM | 5257 | O  | HOH A | 1 | 65.015 | 29.937 | 10.658 | O |
| ATOM | 5258 | H1 | HOH A | 2 | 64.219 | 30.413 | 10.340 | H |

|      |      |    |       |   |        |        |        |   |
|------|------|----|-------|---|--------|--------|--------|---|
| ATOM | 5259 | H2 | HOH A | 3 | 64.997 | 29.939 | 11.638 | H |
| ATOM | 5260 | O  | HOH A | 1 | 65.028 | 29.930 | 32.790 | O |
| ATOM | 5261 | H1 | HOH A | 2 | 64.229 | 30.394 | 32.464 | H |
| ATOM | 5262 | H2 | HOH A | 3 | 65.003 | 29.935 | 33.770 | H |
| ATOM | 5263 | O  | HOH A | 1 | 65.005 | 30.025 | 54.941 | O |
| ATOM | 5264 | H1 | HOH A | 2 | 64.209 | 30.494 | 54.616 | H |
| ATOM | 5265 | H2 | HOH A | 3 | 64.979 | 30.029 | 55.921 | H |
| ATOM | 5266 | O  | HOH A | 1 | 22.088 | 33.950 | 10.700 | O |
| ATOM | 5267 | H1 | HOH A | 2 | 21.281 | 34.404 | 10.380 | H |
| ATOM | 5268 | H2 | HOH A | 3 | 22.066 | 33.949 | 11.680 | H |
| ATOM | 5269 | O  | HOH A | 1 | 22.047 | 33.874 | 32.823 | O |
| ATOM | 5270 | H1 | HOH A | 2 | 21.241 | 34.330 | 32.501 | H |
| ATOM | 5271 | H2 | HOH A | 3 | 22.030 | 33.887 | 33.803 | H |
| ATOM | 5272 | O  | HOH A | 1 | 22.086 | 33.958 | 54.918 | O |
| ATOM | 5273 | H1 | HOH A | 2 | 21.280 | 34.412 | 54.594 | H |
| ATOM | 5274 | H2 | HOH A | 3 | 22.075 | 33.983 | 55.897 | H |
| ATOM | 5275 | O  | HOH A | 1 | 44.666 | 34.060 | 10.625 | O |
| ATOM | 5276 | H1 | HOH A | 2 | 43.865 | 34.524 | 10.304 | H |
| ATOM | 5277 | H2 | HOH A | 3 | 44.646 | 34.064 | 11.605 | H |
| ATOM | 5278 | O  | HOH A | 1 | 44.720 | 33.865 | 32.744 | O |
| ATOM | 5279 | H1 | HOH A | 2 | 43.911 | 34.316 | 32.425 | H |
| ATOM | 5280 | H2 | HOH A | 3 | 44.704 | 33.870 | 33.724 | H |
| ATOM | 5281 | O  | HOH A | 1 | 44.672 | 34.031 | 54.860 | O |
| ATOM | 5282 | H1 | HOH A | 2 | 43.874 | 34.496 | 54.533 | H |
| ATOM | 5283 | H2 | HOH A | 3 | 44.653 | 34.050 | 55.840 | H |
| ATOM | 5284 | O  | HOH A | 1 | 67.286 | 33.869 | 10.634 | O |
| ATOM | 5285 | H1 | HOH A | 2 | 66.490 | 34.337 | 10.308 | H |
| ATOM | 5286 | H2 | HOH A | 3 | 67.256 | 33.866 | 11.614 | H |
| ATOM | 5287 | O  | HOH A | 1 | 67.257 | 33.887 | 32.785 | O |
| ATOM | 5288 | H1 | HOH A | 2 | 66.456 | 34.350 | 32.462 | H |
| ATOM | 5289 | H2 | HOH A | 3 | 67.238 | 33.897 | 33.765 | H |
| ATOM | 5290 | O  | HOH A | 1 | 67.261 | 33.947 | 54.913 | O |
| ATOM | 5291 | H1 | HOH A | 2 | 66.459 | 34.407 | 54.586 | H |
| ATOM | 5292 | H2 | HOH A | 3 | 67.238 | 33.957 | 55.892 | H |
| ATOM | 5293 | O  | HOH A | 1 | 4.012  | 33.848 | 10.692 | O |
| ATOM | 5294 | H1 | HOH A | 2 | 4.008  | 32.928 | 10.356 | H |

|      |      |    |       |   |        |        |        |   |
|------|------|----|-------|---|--------|--------|--------|---|
| ATOM | 5295 | H2 | HOH A | 3 | 3.210  | 34.298 | 10.354 | H |
| ATOM | 5296 | O  | HOH A | 1 | 3.975  | 33.885 | 32.838 | O |
| ATOM | 5297 | H1 | HOH A | 2 | 3.974  | 32.964 | 32.501 | H |
| ATOM | 5298 | H2 | HOH A | 3 | 3.170  | 34.331 | 32.501 | H |
| ATOM | 5299 | O  | HOH A | 1 | 3.969  | 33.940 | 54.956 | O |
| ATOM | 5300 | H1 | HOH A | 2 | 3.964  | 33.019 | 54.620 | H |
| ATOM | 5301 | H2 | HOH A | 3 | 3.163  | 34.387 | 54.623 | H |
| ATOM | 5302 | O  | HOH A | 1 | 26.585 | 34.007 | 10.713 | O |
| ATOM | 5303 | H1 | HOH A | 2 | 26.592 | 33.085 | 10.381 | H |
| ATOM | 5304 | H2 | HOH A | 3 | 25.777 | 34.445 | 10.374 | H |
| ATOM | 5305 | O  | HOH A | 1 | 26.585 | 33.877 | 32.853 | O |
| ATOM | 5306 | H1 | HOH A | 2 | 26.592 | 32.957 | 32.515 | H |
| ATOM | 5307 | H2 | HOH A | 3 | 25.772 | 34.314 | 32.522 | H |
| ATOM | 5308 | O  | HOH A | 1 | 26.593 | 33.977 | 54.933 | O |
| ATOM | 5309 | H1 | HOH A | 2 | 26.592 | 33.054 | 54.605 | H |
| ATOM | 5310 | H2 | HOH A | 3 | 25.789 | 34.421 | 54.591 | H |
| ATOM | 5311 | O  | HOH A | 1 | 49.176 | 34.039 | 10.642 | O |
| ATOM | 5312 | H1 | HOH A | 2 | 49.181 | 33.119 | 10.306 | H |
| ATOM | 5313 | H2 | HOH A | 3 | 48.370 | 34.481 | 10.302 | H |
| ATOM | 5314 | O  | HOH A | 1 | 49.219 | 33.871 | 32.759 | O |
| ATOM | 5315 | H1 | HOH A | 2 | 49.226 | 32.951 | 32.419 | H |
| ATOM | 5316 | H2 | HOH A | 3 | 48.412 | 34.312 | 32.422 | H |
| ATOM | 5317 | O  | HOH A | 1 | 49.186 | 34.029 | 54.896 | O |
| ATOM | 5318 | H1 | HOH A | 2 | 49.190 | 33.105 | 54.569 | H |
| ATOM | 5319 | H2 | HOH A | 3 | 48.379 | 34.468 | 54.554 | H |
| ATOM | 5320 | O  | HOH A | 1 | 8.515  | 33.804 | 10.673 | O |
| ATOM | 5321 | H1 | HOH A | 2 | 9.318  | 34.272 | 10.363 | H |
| ATOM | 5322 | H2 | HOH A | 3 | 8.523  | 33.804 | 11.653 | H |
| ATOM | 5323 | O  | HOH A | 1 | 8.472  | 33.854 | 32.806 | O |
| ATOM | 5324 | H1 | HOH A | 2 | 9.276  | 34.324 | 32.500 | H |
| ATOM | 5325 | H2 | HOH A | 3 | 8.476  | 33.855 | 33.786 | H |
| ATOM | 5326 | O  | HOH A | 1 | 8.473  | 33.897 | 54.906 | O |
| ATOM | 5327 | H1 | HOH A | 2 | 9.279  | 34.361 | 54.596 | H |
| ATOM | 5328 | H2 | HOH A | 3 | 8.478  | 33.903 | 55.886 | H |
| ATOM | 5329 | O  | HOH A | 1 | 31.086 | 34.008 | 10.657 | O |
| ATOM | 5330 | H1 | HOH A | 2 | 31.888 | 34.478 | 10.348 | H |



|      |      |    |       |   |        |        |        |   |
|------|------|----|-------|---|--------|--------|--------|---|
| ATOM | 5331 | H2 | HOH A | 3 | 31.096 | 34.004 | 11.637 | H |
| ATOM | 5332 | O  | HOH A | 1 | 31.096 | 33.846 | 32.781 | O |
| ATOM | 5333 | H1 | HOH A | 2 | 31.897 | 34.319 | 32.470 | H |
| ATOM | 5334 | H2 | HOH A | 3 | 31.109 | 33.842 | 33.761 | H |
| ATOM | 5335 | O  | HOH A | 1 | 31.113 | 33.974 | 54.882 | O |
| ATOM | 5336 | H1 | HOH A | 2 | 31.916 | 34.441 | 54.568 | H |
| ATOM | 5337 | H2 | HOH A | 3 | 31.118 | 33.989 | 55.862 | H |
| ATOM | 5338 | O  | HOH A | 1 | 53.675 | 33.945 | 10.582 | O |
| ATOM | 5339 | H1 | HOH A | 2 | 54.483 | 34.405 | 10.271 | H |
| ATOM | 5340 | H2 | HOH A | 3 | 53.689 | 33.940 | 11.562 | H |
| ATOM | 5341 | O  | HOH A | 1 | 53.720 | 33.846 | 32.727 | O |
| ATOM | 5342 | H1 | HOH A | 2 | 54.523 | 34.314 | 32.414 | H |
| ATOM | 5343 | H2 | HOH A | 3 | 53.731 | 33.848 | 33.707 | H |
| ATOM | 5344 | O  | HOH A | 1 | 53.689 | 33.975 | 54.872 | O |
| ATOM | 5345 | H1 | HOH A | 2 | 54.496 | 34.436 | 54.560 | H |
| ATOM | 5346 | H2 | HOH A | 3 | 53.695 | 33.982 | 55.852 | H |
| ATOM | 5347 | O  | HOH A | 1 | 13.001 | 33.859 | 10.702 | O |
| ATOM | 5348 | H1 | HOH A | 2 | 13.796 | 34.332 | 10.379 | H |
| ATOM | 5349 | H2 | HOH A | 3 | 13.018 | 33.873 | 11.682 | H |
| ATOM | 5350 | O  | HOH A | 1 | 12.961 | 33.860 | 32.846 | O |
| ATOM | 5351 | H1 | HOH A | 2 | 13.758 | 34.330 | 32.523 | H |
| ATOM | 5352 | H2 | HOH A | 3 | 12.976 | 33.879 | 33.826 | H |
| ATOM | 5353 | O  | HOH A | 1 | 12.975 | 33.918 | 54.936 | O |
| ATOM | 5354 | H1 | HOH A | 2 | 13.771 | 34.385 | 54.606 | H |
| ATOM | 5355 | H2 | HOH A | 3 | 12.998 | 33.936 | 55.915 | H |
| ATOM | 5356 | O  | HOH A | 1 | 35.572 | 34.048 | 10.667 | O |
| ATOM | 5357 | H1 | HOH A | 2 | 36.365 | 34.520 | 10.336 | H |
| ATOM | 5358 | H2 | HOH A | 3 | 35.597 | 34.062 | 11.646 | H |
| ATOM | 5359 | O  | HOH A | 1 | 35.593 | 33.853 | 32.786 | O |
| ATOM | 5360 | H1 | HOH A | 2 | 36.386 | 34.318 | 32.447 | H |
| ATOM | 5361 | H2 | HOH A | 3 | 35.623 | 33.878 | 33.765 | H |
| ATOM | 5362 | O  | HOH A | 1 | 35.581 | 34.000 | 54.892 | O |
| ATOM | 5363 | H1 | HOH A | 2 | 36.380 | 34.463 | 54.564 | H |
| ATOM | 5364 | H2 | HOH A | 3 | 35.598 | 34.024 | 55.872 | H |
| ATOM | 5365 | O  | HOH A | 1 | 58.174 | 33.918 | 10.632 | O |
| ATOM | 5366 | H1 | HOH A | 2 | 58.974 | 34.385 | 10.309 | H |

|      |      |    |       |   |        |        |        |   |
|------|------|----|-------|---|--------|--------|--------|---|
| ATOM | 5367 | H2 | HOH A | 3 | 58.193 | 33.927 | 11.611 | H |
| ATOM | 5368 | O  | HOH A | 1 | 58.194 | 33.856 | 32.760 | O |
| ATOM | 5369 | H1 | HOH A | 2 | 58.992 | 34.322 | 32.434 | H |
| ATOM | 5370 | H2 | HOH A | 3 | 58.211 | 33.875 | 33.740 | H |
| ATOM | 5371 | O  | HOH A | 1 | 58.177 | 33.965 | 54.919 | O |
| ATOM | 5372 | H1 | HOH A | 2 | 58.973 | 34.434 | 54.594 | H |
| ATOM | 5373 | H2 | HOH A | 3 | 58.193 | 33.986 | 55.899 | H |
| ATOM | 5374 | O  | HOH A | 1 | 17.576 | 33.914 | 10.691 | O |
| ATOM | 5375 | H1 | HOH A | 2 | 16.764 | 34.360 | 10.371 | H |
| ATOM | 5376 | H2 | HOH A | 3 | 17.558 | 33.918 | 11.671 | H |
| ATOM | 5377 | O  | HOH A | 1 | 17.529 | 33.867 | 32.818 | O |
| ATOM | 5378 | H1 | HOH A | 2 | 16.718 | 34.318 | 32.504 | H |
| ATOM | 5379 | H2 | HOH A | 3 | 17.516 | 33.867 | 33.798 | H |
| ATOM | 5380 | O  | HOH A | 1 | 17.551 | 33.957 | 54.909 | O |
| ATOM | 5381 | H1 | HOH A | 2 | 16.741 | 34.406 | 54.589 | H |
| ATOM | 5382 | H2 | HOH A | 3 | 17.533 | 33.961 | 55.889 | H |
| ATOM | 5383 | O  | HOH A | 1 | 40.151 | 34.079 | 10.628 | O |
| ATOM | 5384 | H1 | HOH A | 2 | 39.350 | 34.542 | 10.305 | H |
| ATOM | 5385 | H2 | HOH A | 3 | 40.125 | 34.078 | 11.608 | H |
| ATOM | 5386 | O  | HOH A | 1 | 40.191 | 33.867 | 32.743 | O |
| ATOM | 5387 | H1 | HOH A | 2 | 39.384 | 34.315 | 32.415 | H |
| ATOM | 5388 | H2 | HOH A | 3 | 40.168 | 33.878 | 33.722 | H |
| ATOM | 5389 | O  | HOH A | 1 | 40.165 | 34.032 | 54.866 | O |
| ATOM | 5390 | H1 | HOH A | 2 | 39.357 | 34.480 | 54.540 | H |
| ATOM | 5391 | H2 | HOH A | 3 | 40.143 | 34.041 | 55.845 | H |
| ATOM | 5392 | O  | HOH A | 1 | 62.769 | 33.909 | 10.616 | O |
| ATOM | 5393 | H1 | HOH A | 2 | 61.962 | 34.364 | 10.298 | H |
| ATOM | 5394 | H2 | HOH A | 3 | 62.749 | 33.905 | 11.596 | H |
| ATOM | 5395 | O  | HOH A | 1 | 62.762 | 33.869 | 32.747 | O |
| ATOM | 5396 | H1 | HOH A | 2 | 61.956 | 34.322 | 32.420 | H |
| ATOM | 5397 | H2 | HOH A | 3 | 62.738 | 33.878 | 33.727 | H |
| ATOM | 5398 | O  | HOH A | 1 | 62.753 | 33.982 | 54.891 | O |
| ATOM | 5399 | H1 | HOH A | 2 | 61.948 | 34.440 | 54.569 | H |
| ATOM | 5400 | H2 | HOH A | 3 | 62.732 | 33.986 | 55.870 | H |
| ATOM | 5401 | O  | HOH A | 1 | 1.712  | 37.774 | 10.656 | O |
| ATOM | 5402 | H1 | HOH A | 2 | 1.720  | 36.852 | 10.325 | H |

|      |      |    |       |   |        |        |        |   |
|------|------|----|-------|---|--------|--------|--------|---|
| ATOM | 5403 | H2 | HOH A | 3 | 2.528  | 38.216 | 10.341 | H |
| ATOM | 5404 | O  | HOH A | 1 | 1.692  | 37.811 | 32.796 | O |
| ATOM | 5405 | H1 | HOH A | 2 | 1.704  | 36.888 | 32.467 | H |
| ATOM | 5406 | H2 | HOH A | 3 | 2.505  | 38.256 | 32.477 | H |
| ATOM | 5407 | O  | HOH A | 1 | 1.673  | 37.855 | 54.933 | O |
| ATOM | 5408 | H1 | HOH A | 2 | 1.680  | 36.935 | 54.596 | H |
| ATOM | 5409 | H2 | HOH A | 3 | 2.485  | 38.301 | 54.612 | H |
| ATOM | 5410 | O  | HOH A | 1 | 24.295 | 37.910 | 10.697 | O |
| ATOM | 5411 | H1 | HOH A | 2 | 24.312 | 36.987 | 10.366 | H |
| ATOM | 5412 | H2 | HOH A | 3 | 25.103 | 38.362 | 10.376 | H |
| ATOM | 5413 | O  | HOH A | 1 | 24.279 | 37.782 | 32.832 | O |
| ATOM | 5414 | H1 | HOH A | 2 | 24.287 | 36.859 | 32.502 | H |
| ATOM | 5415 | H2 | HOH A | 3 | 25.091 | 38.225 | 32.510 | H |
| ATOM | 5416 | O  | HOH A | 1 | 24.317 | 37.887 | 54.914 | O |
| ATOM | 5417 | H1 | HOH A | 2 | 24.328 | 36.965 | 54.582 | H |
| ATOM | 5418 | H2 | HOH A | 3 | 25.122 | 38.338 | 54.585 | H |
| ATOM | 5419 | O  | HOH A | 1 | 46.886 | 37.971 | 10.616 | O |
| ATOM | 5420 | H1 | HOH A | 2 | 46.892 | 37.049 | 10.282 | H |
| ATOM | 5421 | H2 | HOH A | 3 | 47.701 | 38.413 | 10.300 | H |
| ATOM | 5422 | O  | HOH A | 1 | 46.938 | 37.792 | 32.731 | O |
| ATOM | 5423 | H1 | HOH A | 2 | 46.947 | 36.873 | 32.392 | H |
| ATOM | 5424 | H2 | HOH A | 3 | 47.753 | 38.238 | 32.418 | H |
| ATOM | 5425 | O  | HOH A | 1 | 46.907 | 37.949 | 54.861 | O |
| ATOM | 5426 | H1 | HOH A | 2 | 46.909 | 37.025 | 54.532 | H |
| ATOM | 5427 | H2 | HOH A | 3 | 47.720 | 38.388 | 54.535 | H |
| ATOM | 5428 | O  | HOH A | 1 | 6.286  | 37.765 | 10.674 | O |
| ATOM | 5429 | H1 | HOH A | 2 | 6.279  | 36.840 | 10.351 | H |
| ATOM | 5430 | H2 | HOH A | 3 | 5.476  | 38.207 | 10.343 | H |
| ATOM | 5431 | O  | HOH A | 1 | 6.248  | 37.805 | 32.819 | O |
| ATOM | 5432 | H1 | HOH A | 2 | 6.247  | 36.881 | 32.494 | H |
| ATOM | 5433 | H2 | HOH A | 3 | 5.440  | 38.245 | 32.482 | H |
| ATOM | 5434 | O  | HOH A | 1 | 6.249  | 37.854 | 54.940 | O |
| ATOM | 5435 | H1 | HOH A | 2 | 6.243  | 36.927 | 54.623 | H |
| ATOM | 5436 | H2 | HOH A | 3 | 5.432  | 38.290 | 54.618 | H |
| ATOM | 5437 | O  | HOH A | 1 | 28.858 | 37.949 | 10.686 | O |
| ATOM | 5438 | H1 | HOH A | 2 | 28.854 | 37.024 | 10.364 | H |

|      |      |    |       |   |        |        |        |   |
|------|------|----|-------|---|--------|--------|--------|---|
| ATOM | 5439 | H2 | HOH A | 3 | 28.049 | 38.389 | 10.351 | H |
| ATOM | 5440 | O  | HOH A | 1 | 28.872 | 37.794 | 32.819 | O |
| ATOM | 5441 | H1 | HOH A | 2 | 28.869 | 36.868 | 32.499 | H |
| ATOM | 5442 | H2 | HOH A | 3 | 28.055 | 38.229 | 32.496 | H |
| ATOM | 5443 | O  | HOH A | 1 | 28.871 | 37.898 | 54.909 | O |
| ATOM | 5444 | H1 | HOH A | 2 | 28.866 | 36.973 | 54.587 | H |
| ATOM | 5445 | H2 | HOH A | 3 | 28.058 | 38.338 | 54.581 | H |
| ATOM | 5446 | O  | HOH A | 1 | 51.452 | 37.937 | 10.596 | O |
| ATOM | 5447 | H1 | HOH A | 2 | 51.448 | 37.013 | 10.271 | H |
| ATOM | 5448 | H2 | HOH A | 3 | 50.640 | 38.377 | 10.269 | H |
| ATOM | 5449 | O  | HOH A | 1 | 51.511 | 37.790 | 32.737 | O |
| ATOM | 5450 | H1 | HOH A | 2 | 51.510 | 36.866 | 32.412 | H |
| ATOM | 5451 | H2 | HOH A | 3 | 50.700 | 38.229 | 32.407 | H |
| ATOM | 5452 | O  | HOH A | 1 | 51.468 | 37.940 | 54.875 | O |
| ATOM | 5453 | H1 | HOH A | 2 | 51.467 | 37.014 | 54.555 | H |
| ATOM | 5454 | H2 | HOH A | 3 | 50.655 | 38.376 | 54.544 | H |
| ATOM | 5455 | O  | HOH A | 1 | 10.789 | 37.773 | 10.692 | O |
| ATOM | 5456 | H1 | HOH A | 2 | 10.791 | 36.853 | 10.356 | H |
| ATOM | 5457 | H2 | HOH A | 3 | 11.594 | 38.220 | 10.357 | H |
| ATOM | 5458 | O  | HOH A | 1 | 10.755 | 37.799 | 32.832 | O |
| ATOM | 5459 | H1 | HOH A | 2 | 10.763 | 36.879 | 32.495 | H |
| ATOM | 5460 | H2 | HOH A | 3 | 11.561 | 38.249 | 32.504 | H |
| ATOM | 5461 | O  | HOH A | 1 | 10.754 | 37.849 | 54.934 | O |
| ATOM | 5462 | H1 | HOH A | 2 | 10.761 | 36.927 | 54.601 | H |
| ATOM | 5463 | H2 | HOH A | 3 | 11.561 | 38.296 | 54.603 | H |
| ATOM | 5464 | O  | HOH A | 1 | 33.359 | 37.973 | 10.668 | O |
| ATOM | 5465 | H1 | HOH A | 2 | 33.364 | 37.051 | 10.336 | H |
| ATOM | 5466 | H2 | HOH A | 3 | 34.162 | 38.421 | 10.330 | H |
| ATOM | 5467 | O  | HOH A | 1 | 33.386 | 37.804 | 32.771 | O |
| ATOM | 5468 | H1 | HOH A | 2 | 33.390 | 36.882 | 32.439 | H |
| ATOM | 5469 | H2 | HOH A | 3 | 34.189 | 38.252 | 32.431 | H |
| ATOM | 5470 | O  | HOH A | 1 | 33.388 | 37.936 | 54.887 | O |
| ATOM | 5471 | H1 | HOH A | 2 | 33.401 | 37.015 | 54.552 | H |
| ATOM | 5472 | H2 | HOH A | 3 | 34.188 | 38.391 | 54.551 | H |
| ATOM | 5473 | O  | HOH A | 1 | 55.961 | 37.863 | 10.604 | O |
| ATOM | 5474 | H1 | HOH A | 2 | 55.966 | 36.945 | 10.263 | H |

|      |      |    |       |   |        |        |        |   |
|------|------|----|-------|---|--------|--------|--------|---|
| ATOM | 5475 | H2 | HOH A | 3 | 56.771 | 38.311 | 10.283 | H |
| ATOM | 5476 | O  | HOH A | 1 | 56.007 | 37.797 | 32.735 | O |
| ATOM | 5477 | H1 | HOH A | 2 | 56.017 | 36.877 | 32.399 | H |
| ATOM | 5478 | H2 | HOH A | 3 | 56.810 | 38.250 | 32.403 | H |
| ATOM | 5479 | O  | HOH A | 1 | 55.961 | 37.922 | 54.893 | O |
| ATOM | 5480 | H1 | HOH A | 2 | 55.970 | 36.998 | 54.567 | H |
| ATOM | 5481 | H2 | HOH A | 3 | 56.769 | 38.367 | 54.563 | H |
| ATOM | 5482 | O  | HOH A | 1 | 15.316 | 37.797 | 10.702 | O |
| ATOM | 5483 | H1 | HOH A | 2 | 14.515 | 38.266 | 10.387 | H |
| ATOM | 5484 | H2 | HOH A | 3 | 15.306 | 37.805 | 11.681 | H |
| ATOM | 5485 | O  | HOH A | 1 | 15.265 | 37.772 | 32.849 | O |
| ATOM | 5486 | H1 | HOH A | 2 | 14.467 | 38.246 | 32.534 | H |
| ATOM | 5487 | H2 | HOH A | 3 | 15.256 | 37.783 | 33.829 | H |
| ATOM | 5488 | O  | HOH A | 1 | 15.281 | 37.843 | 54.935 | O |
| ATOM | 5489 | H1 | HOH A | 2 | 14.481 | 38.315 | 54.622 | H |
| ATOM | 5490 | H2 | HOH A | 3 | 15.279 | 37.860 | 55.915 | H |
| ATOM | 5491 | O  | HOH A | 1 | 37.878 | 37.971 | 10.656 | O |
| ATOM | 5492 | H1 | HOH A | 2 | 37.078 | 38.444 | 10.345 | H |
| ATOM | 5493 | H2 | HOH A | 3 | 37.875 | 37.982 | 11.636 | H |
| ATOM | 5494 | O  | HOH A | 1 | 37.919 | 37.769 | 32.774 | O |
| ATOM | 5495 | H1 | HOH A | 2 | 37.124 | 38.249 | 32.462 | H |
| ATOM | 5496 | H2 | HOH A | 3 | 37.912 | 37.777 | 33.754 | H |
| ATOM | 5497 | O  | HOH A | 1 | 37.892 | 37.909 | 54.874 | O |
| ATOM | 5498 | H1 | HOH A | 2 | 37.096 | 38.385 | 54.559 | H |
| ATOM | 5499 | H2 | HOH A | 3 | 37.895 | 37.938 | 55.853 | H |
| ATOM | 5500 | O  | HOH A | 1 | 60.478 | 37.804 | 10.652 | O |
| ATOM | 5501 | H1 | HOH A | 2 | 59.679 | 38.279 | 10.342 | H |
| ATOM | 5502 | H2 | HOH A | 3 | 60.475 | 37.814 | 11.632 | H |
| ATOM | 5503 | O  | HOH A | 1 | 60.498 | 37.771 | 32.766 | O |
| ATOM | 5504 | H1 | HOH A | 2 | 59.705 | 38.252 | 32.450 | H |
| ATOM | 5505 | H2 | HOH A | 3 | 60.491 | 37.784 | 33.745 | H |
| ATOM | 5506 | O  | HOH A | 1 | 60.467 | 37.882 | 54.908 | O |
| ATOM | 5507 | H1 | HOH A | 2 | 59.669 | 38.356 | 54.593 | H |
| ATOM | 5508 | H2 | HOH A | 3 | 60.460 | 37.896 | 55.888 | H |
| ATOM | 5509 | O  | HOH A | 1 | 19.818 | 37.860 | 10.676 | O |
| ATOM | 5510 | H1 | HOH A | 2 | 19.818 | 36.934 | 10.355 | H |

|      |      |    |       |   |        |        |        |   |
|------|------|----|-------|---|--------|--------|--------|---|
| ATOM | 5511 | H2 | HOH A | 3 | 19.836 | 37.841 | 11.656 | H |
| ATOM | 5512 | O  | HOH A | 1 | 19.782 | 37.799 | 32.802 | O |
| ATOM | 5513 | H1 | HOH A | 2 | 19.778 | 36.873 | 32.481 | H |
| ATOM | 5514 | H2 | HOH A | 3 | 19.797 | 37.780 | 33.781 | H |
| ATOM | 5515 | O  | HOH A | 1 | 19.809 | 37.876 | 54.901 | O |
| ATOM | 5516 | H1 | HOH A | 2 | 19.809 | 36.948 | 54.586 | H |
| ATOM | 5517 | H2 | HOH A | 3 | 19.832 | 37.863 | 55.880 | H |
| ATOM | 5518 | O  | HOH A | 1 | 42.400 | 37.993 | 10.613 | O |
| ATOM | 5519 | H1 | HOH A | 2 | 42.394 | 37.068 | 10.290 | H |
| ATOM | 5520 | H2 | HOH A | 3 | 42.420 | 37.972 | 11.593 | H |
| ATOM | 5521 | O  | HOH A | 1 | 42.448 | 37.793 | 32.722 | O |
| ATOM | 5522 | H1 | HOH A | 2 | 42.450 | 36.863 | 32.410 | H |
| ATOM | 5523 | H2 | HOH A | 3 | 42.470 | 37.783 | 33.701 | H |
| ATOM | 5524 | O  | HOH A | 1 | 42.428 | 37.972 | 54.846 | O |
| ATOM | 5525 | H1 | HOH A | 2 | 42.422 | 37.042 | 54.539 | H |
| ATOM | 5526 | H2 | HOH A | 3 | 42.451 | 37.967 | 55.826 | H |
| ATOM | 5527 | O  | HOH A | 1 | 65.011 | 37.827 | 10.633 | O |
| ATOM | 5528 | H1 | HOH A | 2 | 65.017 | 36.901 | 10.311 | H |
| ATOM | 5529 | H2 | HOH A | 3 | 65.027 | 37.807 | 11.613 | H |
| ATOM | 5530 | O  | HOH A | 1 | 65.010 | 37.817 | 32.743 | O |
| ATOM | 5531 | H1 | HOH A | 2 | 65.004 | 36.890 | 32.426 | H |
| ATOM | 5532 | H2 | HOH A | 3 | 65.019 | 37.802 | 33.723 | H |
| ATOM | 5533 | O  | HOH A | 1 | 64.992 | 37.892 | 54.889 | O |
| ATOM | 5534 | H1 | HOH A | 2 | 64.990 | 36.966 | 54.568 | H |
| ATOM | 5535 | H2 | HOH A | 3 | 65.013 | 37.872 | 55.869 | H |
| ATOM | 5536 | O  | HOH A | 1 | 22.084 | 41.791 | 10.691 | O |
| ATOM | 5537 | H1 | HOH A | 2 | 22.070 | 40.870 | 10.358 | H |
| ATOM | 5538 | H2 | HOH A | 3 | 21.282 | 42.246 | 10.358 | H |
| ATOM | 5539 | O  | HOH A | 1 | 22.072 | 41.708 | 32.822 | O |
| ATOM | 5540 | H1 | HOH A | 2 | 22.042 | 40.784 | 32.496 | H |
| ATOM | 5541 | H2 | HOH A | 3 | 21.280 | 42.175 | 32.482 | H |
| ATOM | 5542 | O  | HOH A | 1 | 22.093 | 41.799 | 54.934 | O |
| ATOM | 5543 | H1 | HOH A | 2 | 22.073 | 40.875 | 54.609 | H |
| ATOM | 5544 | H2 | HOH A | 3 | 21.293 | 42.255 | 54.600 | H |
| ATOM | 5545 | O  | HOH A | 1 | 44.679 | 41.892 | 10.633 | O |
| ATOM | 5546 | H1 | HOH A | 2 | 44.650 | 40.971 | 10.300 | H |

|      |      |    |       |   |        |        |        |   |
|------|------|----|-------|---|--------|--------|--------|---|
| ATOM | 5547 | H2 | HOH A | 3 | 43.886 | 42.360 | 10.297 | H |
| ATOM | 5548 | O  | HOH A | 1 | 44.722 | 41.710 | 32.744 | O |
| ATOM | 5549 | H1 | HOH A | 2 | 44.689 | 40.787 | 32.415 | H |
| ATOM | 5550 | H2 | HOH A | 3 | 43.926 | 42.177 | 32.415 | H |
| ATOM | 5551 | O  | HOH A | 1 | 44.685 | 41.869 | 54.881 | O |
| ATOM | 5552 | H1 | HOH A | 2 | 44.668 | 40.946 | 54.552 | H |
| ATOM | 5553 | H2 | HOH A | 3 | 43.891 | 42.329 | 54.536 | H |
| ATOM | 5554 | O  | HOH A | 1 | 67.300 | 41.714 | 10.658 | O |
| ATOM | 5555 | H1 | HOH A | 2 | 67.277 | 40.792 | 10.325 | H |
| ATOM | 5556 | H2 | HOH A | 3 | 66.504 | 42.176 | 10.324 | H |
| ATOM | 5557 | O  | HOH A | 1 | 67.285 | 41.715 | 32.787 | O |
| ATOM | 5558 | H1 | HOH A | 2 | 67.261 | 40.794 | 32.452 | H |
| ATOM | 5559 | H2 | HOH A | 3 | 66.492 | 42.180 | 32.448 | H |
| ATOM | 5560 | O  | HOH A | 1 | 67.263 | 41.781 | 54.937 | O |
| ATOM | 5561 | H1 | HOH A | 2 | 67.238 | 40.860 | 54.601 | H |
| ATOM | 5562 | H2 | HOH A | 3 | 66.468 | 42.246 | 54.602 | H |
| ATOM | 5563 | O  | HOH A | 1 | 4.010  | 41.635 | 10.654 | O |
| ATOM | 5564 | H1 | HOH A | 2 | 3.205  | 42.100 | 10.343 | H |
| ATOM | 5565 | H2 | HOH A | 3 | 4.008  | 41.648 | 11.633 | H |
| ATOM | 5566 | O  | HOH A | 1 | 3.997  | 41.668 | 32.789 | O |
| ATOM | 5567 | H1 | HOH A | 2 | 3.193  | 42.132 | 32.475 | H |
| ATOM | 5568 | H2 | HOH A | 3 | 3.993  | 41.686 | 33.769 | H |
| ATOM | 5569 | O  | HOH A | 1 | 3.980  | 41.718 | 54.920 | O |
| ATOM | 5570 | H1 | HOH A | 2 | 3.173  | 42.180 | 54.609 | H |
| ATOM | 5571 | H2 | HOH A | 3 | 3.981  | 41.736 | 55.900 | H |
| ATOM | 5572 | O  | HOH A | 1 | 26.604 | 41.795 | 10.676 | O |
| ATOM | 5573 | H1 | HOH A | 2 | 25.796 | 42.253 | 10.363 | H |
| ATOM | 5574 | H2 | HOH A | 3 | 26.600 | 41.809 | 11.656 | H |
| ATOM | 5575 | O  | HOH A | 1 | 26.593 | 41.640 | 32.799 | O |
| ATOM | 5576 | H1 | HOH A | 2 | 25.792 | 42.114 | 32.494 | H |
| ATOM | 5577 | H2 | HOH A | 3 | 26.598 | 41.654 | 33.779 | H |
| ATOM | 5578 | O  | HOH A | 1 | 26.608 | 41.770 | 54.901 | O |
| ATOM | 5579 | H1 | HOH A | 2 | 25.802 | 42.234 | 54.590 | H |
| ATOM | 5580 | H2 | HOH A | 3 | 26.611 | 41.791 | 55.880 | H |
| ATOM | 5581 | O  | HOH A | 1 | 49.186 | 41.816 | 10.592 | O |
| ATOM | 5582 | H1 | HOH A | 2 | 48.384 | 42.288 | 10.282 | H |

|      |      |    |       |   |        |        |        |   |
|------|------|----|-------|---|--------|--------|--------|---|
| ATOM | 5583 | H2 | HOH A | 3 | 49.179 | 41.818 | 11.572 | H |
| ATOM | 5584 | O  | HOH A | 1 | 49.240 | 41.652 | 32.725 | O |
| ATOM | 5585 | H1 | HOH A | 2 | 48.437 | 42.115 | 32.408 | H |
| ATOM | 5586 | H2 | HOH A | 3 | 49.234 | 41.669 | 33.704 | H |
| ATOM | 5587 | O  | HOH A | 1 | 49.200 | 41.809 | 54.867 | O |
| ATOM | 5588 | H1 | HOH A | 2 | 48.398 | 42.280 | 54.560 | H |
| ATOM | 5589 | H2 | HOH A | 3 | 49.204 | 41.824 | 55.847 | H |
| ATOM | 5590 | O  | HOH A | 1 | 8.541  | 41.685 | 10.690 | O |
| ATOM | 5591 | H1 | HOH A | 2 | 8.523  | 40.759 | 10.369 | H |
| ATOM | 5592 | H2 | HOH A | 3 | 7.731  | 42.133 | 10.367 | H |
| ATOM | 5593 | O  | HOH A | 1 | 8.508  | 41.710 | 32.828 | O |
| ATOM | 5594 | H1 | HOH A | 2 | 8.480  | 40.781 | 32.518 | H |
| ATOM | 5595 | H2 | HOH A | 3 | 7.703  | 42.163 | 32.501 | H |
| ATOM | 5596 | O  | HOH A | 1 | 8.510  | 41.758 | 54.958 | O |
| ATOM | 5597 | H1 | HOH A | 2 | 8.491  | 40.831 | 54.641 | H |
| ATOM | 5598 | H2 | HOH A | 3 | 7.701  | 42.206 | 54.635 | H |
| ATOM | 5599 | O  | HOH A | 1 | 31.119 | 41.870 | 10.694 | O |
| ATOM | 5600 | H1 | HOH A | 2 | 31.095 | 40.943 | 10.376 | H |
| ATOM | 5601 | H2 | HOH A | 3 | 30.308 | 42.320 | 10.377 | H |
| ATOM | 5602 | O  | HOH A | 1 | 31.131 | 41.705 | 32.813 | O |
| ATOM | 5603 | H1 | HOH A | 2 | 31.118 | 40.781 | 32.488 | H |
| ATOM | 5604 | H2 | HOH A | 3 | 30.317 | 42.149 | 32.495 | H |
| ATOM | 5605 | O  | HOH A | 1 | 31.135 | 41.823 | 54.905 | O |
| ATOM | 5606 | H1 | HOH A | 2 | 31.116 | 40.895 | 54.592 | H |
| ATOM | 5607 | H2 | HOH A | 3 | 30.325 | 42.269 | 54.579 | H |
| ATOM | 5608 | O  | HOH A | 1 | 53.722 | 41.808 | 10.626 | O |
| ATOM | 5609 | H1 | HOH A | 2 | 53.699 | 40.882 | 10.305 | H |
| ATOM | 5610 | H2 | HOH A | 3 | 52.916 | 42.261 | 10.300 | H |
| ATOM | 5611 | O  | HOH A | 1 | 53.747 | 41.710 | 32.761 | O |
| ATOM | 5612 | H1 | HOH A | 2 | 53.730 | 40.783 | 32.444 | H |
| ATOM | 5613 | H2 | HOH A | 3 | 52.933 | 42.154 | 32.444 | H |
| ATOM | 5614 | O  | HOH A | 1 | 53.721 | 41.839 | 54.898 | O |
| ATOM | 5615 | H1 | HOH A | 2 | 53.704 | 40.913 | 54.578 | H |
| ATOM | 5616 | H2 | HOH A | 3 | 52.911 | 42.286 | 54.576 | H |
| ATOM | 5617 | O  | HOH A | 1 | 13.037 | 41.681 | 10.742 | O |
| ATOM | 5618 | H1 | HOH A | 2 | 12.243 | 42.144 | 10.401 | H |



|      |      |    |       |   |        |        |        |   |
|------|------|----|-------|---|--------|--------|--------|---|
| ATOM | 5619 | H2 | HOH A | 3 | 13.829 | 42.152 | 10.408 | H |
| ATOM | 5620 | O  | HOH A | 1 | 13.007 | 41.690 | 32.873 | O |
| ATOM | 5621 | H1 | HOH A | 2 | 12.221 | 42.160 | 32.525 | H |
| ATOM | 5622 | H2 | HOH A | 3 | 13.806 | 42.153 | 32.546 | H |
| ATOM | 5623 | O  | HOH A | 1 | 13.012 | 41.755 | 54.983 | O |
| ATOM | 5624 | H1 | HOH A | 2 | 12.225 | 42.227 | 54.640 | H |
| ATOM | 5625 | H2 | HOH A | 3 | 13.811 | 42.219 | 54.655 | H |
| ATOM | 5626 | O  | HOH A | 1 | 35.617 | 41.867 | 10.707 | O |
| ATOM | 5627 | H1 | HOH A | 2 | 34.827 | 42.339 | 10.370 | H |
| ATOM | 5628 | H2 | HOH A | 3 | 36.413 | 42.334 | 10.376 | H |
| ATOM | 5629 | O  | HOH A | 1 | 35.653 | 41.687 | 32.825 | O |
| ATOM | 5630 | H1 | HOH A | 2 | 34.863 | 42.160 | 32.491 | H |
| ATOM | 5631 | H2 | HOH A | 3 | 36.448 | 42.154 | 32.492 | H |
| ATOM | 5632 | O  | HOH A | 1 | 35.635 | 41.832 | 54.918 | O |
| ATOM | 5633 | H1 | HOH A | 2 | 34.845 | 42.302 | 54.578 | H |
| ATOM | 5634 | H2 | HOH A | 3 | 36.431 | 42.296 | 54.584 | H |
| ATOM | 5635 | O  | HOH A | 1 | 58.217 | 41.741 | 10.669 | O |
| ATOM | 5636 | H1 | HOH A | 2 | 57.433 | 42.224 | 10.334 | H |
| ATOM | 5637 | H2 | HOH A | 3 | 59.019 | 42.202 | 10.344 | H |
| ATOM | 5638 | O  | HOH A | 1 | 58.250 | 41.701 | 32.797 | O |
| ATOM | 5639 | H1 | HOH A | 2 | 57.462 | 42.173 | 32.455 | H |
| ATOM | 5640 | H2 | HOH A | 3 | 59.047 | 42.164 | 32.465 | H |
| ATOM | 5641 | O  | HOH A | 1 | 58.226 | 41.799 | 54.935 | O |
| ATOM | 5642 | H1 | HOH A | 2 | 57.441 | 42.275 | 54.593 | H |
| ATOM | 5643 | H2 | HOH A | 3 | 59.027 | 42.258 | 54.605 | H |
| ATOM | 5644 | O  | HOH A | 1 | 17.557 | 41.746 | 10.706 | O |
| ATOM | 5645 | H1 | HOH A | 2 | 17.588 | 40.821 | 10.384 | H |
| ATOM | 5646 | H2 | HOH A | 3 | 18.357 | 42.208 | 10.379 | H |
| ATOM | 5647 | O  | HOH A | 1 | 17.541 | 41.697 | 32.855 | O |
| ATOM | 5648 | H1 | HOH A | 2 | 17.565 | 40.771 | 32.534 | H |
| ATOM | 5649 | H2 | HOH A | 3 | 18.342 | 42.153 | 32.523 | H |
| ATOM | 5650 | O  | HOH A | 1 | 17.560 | 41.761 | 54.968 | O |
| ATOM | 5651 | H1 | HOH A | 2 | 17.582 | 40.839 | 54.634 | H |
| ATOM | 5652 | H2 | HOH A | 3 | 18.357 | 42.223 | 54.633 | H |
| ATOM | 5653 | O  | HOH A | 1 | 40.151 | 41.894 | 10.666 | O |
| ATOM | 5654 | H1 | HOH A | 2 | 40.172 | 40.973 | 10.333 | H |

|      |      |    |       |   |        |        |        |   |
|------|------|----|-------|---|--------|--------|--------|---|
| ATOM | 5655 | H2 | HOH A | 3 | 40.952 | 42.354 | 10.339 | H |
| ATOM | 5656 | O  | HOH A | 1 | 40.188 | 41.680 | 32.779 | O |
| ATOM | 5657 | H1 | HOH A | 2 | 40.214 | 40.757 | 32.449 | H |
| ATOM | 5658 | H2 | HOH A | 3 | 40.986 | 42.142 | 32.449 | H |
| ATOM | 5659 | O  | HOH A | 1 | 40.165 | 41.840 | 54.901 | O |
| ATOM | 5660 | H1 | HOH A | 2 | 40.193 | 40.916 | 54.574 | H |
| ATOM | 5661 | H2 | HOH A | 3 | 40.963 | 42.302 | 54.571 | H |
| ATOM | 5662 | O  | HOH A | 1 | 62.752 | 41.722 | 10.676 | O |
| ATOM | 5663 | H1 | HOH A | 2 | 62.764 | 40.799 | 10.348 | H |
| ATOM | 5664 | H2 | HOH A | 3 | 63.555 | 42.173 | 10.342 | H |
| ATOM | 5665 | O  | HOH A | 1 | 62.764 | 41.687 | 32.783 | O |
| ATOM | 5666 | H1 | HOH A | 2 | 62.790 | 40.762 | 32.460 | H |
| ATOM | 5667 | H2 | HOH A | 3 | 63.568 | 42.144 | 32.458 | H |
| ATOM | 5668 | O  | HOH A | 1 | 62.752 | 41.784 | 54.946 | O |
| ATOM | 5669 | H1 | HOH A | 2 | 62.770 | 40.859 | 54.621 | H |
| ATOM | 5670 | H2 | HOH A | 3 | 63.553 | 42.238 | 54.611 | H |
| ATOM | 5671 | O  | HOH A | 1 | 22.092 | 47.003 | 9.774  | O |
| ATOM | 5672 | H1 | HOH A | 2 | 22.088 | 47.930 | 10.093 | H |
| ATOM | 5673 | H2 | HOH A | 3 | 22.098 | 47.020 | 8.794  | H |
| ATOM | 5674 | O  | HOH A | 1 | 22.083 | 46.916 | 31.917 | O |
| ATOM | 5675 | H1 | HOH A | 2 | 22.073 | 47.844 | 32.233 | H |
| ATOM | 5676 | H2 | HOH A | 3 | 22.094 | 46.930 | 30.937 | H |
| ATOM | 5677 | O  | HOH A | 1 | 22.089 | 46.993 | 54.023 | O |
| ATOM | 5678 | H1 | HOH A | 2 | 22.079 | 47.925 | 54.324 | H |
| ATOM | 5679 | H2 | HOH A | 3 | 22.094 | 46.990 | 53.043 | H |
| ATOM | 5680 | O  | HOH A | 1 | 44.678 | 47.095 | 9.731  | O |
| ATOM | 5681 | H1 | HOH A | 2 | 44.669 | 48.022 | 10.048 | H |
| ATOM | 5682 | H2 | HOH A | 3 | 44.684 | 47.110 | 8.751  | H |
| ATOM | 5683 | O  | HOH A | 1 | 44.707 | 46.894 | 31.846 | O |
| ATOM | 5684 | H1 | HOH A | 2 | 44.698 | 47.822 | 32.162 | H |
| ATOM | 5685 | H2 | HOH A | 3 | 44.715 | 46.908 | 30.866 | H |
| ATOM | 5686 | O  | HOH A | 1 | 44.691 | 47.073 | 53.980 | O |
| ATOM | 5687 | H1 | HOH A | 2 | 44.682 | 48.006 | 54.277 | H |
| ATOM | 5688 | H2 | HOH A | 3 | 44.698 | 47.067 | 53.000 | H |
| ATOM | 5689 | O  | HOH A | 1 | 67.291 | 46.902 | 9.749  | O |
| ATOM | 5690 | H1 | HOH A | 2 | 67.276 | 47.831 | 10.061 | H |

|      |      |    |       |   |        |        |        |   |
|------|------|----|-------|---|--------|--------|--------|---|
| ATOM | 5691 | H2 | HOH A | 3 | 67.310 | 46.911 | 8.769  | H |
| ATOM | 5692 | O  | HOH A | 1 | 67.290 | 46.904 | 31.887 | O |
| ATOM | 5693 | H1 | HOH A | 2 | 67.285 | 47.832 | 32.201 | H |
| ATOM | 5694 | H2 | HOH A | 3 | 67.300 | 46.915 | 30.907 | H |
| ATOM | 5695 | O  | HOH A | 1 | 67.272 | 46.985 | 54.031 | O |
| ATOM | 5696 | H1 | HOH A | 2 | 67.269 | 47.915 | 54.339 | H |
| ATOM | 5697 | H2 | HOH A | 3 | 67.278 | 46.990 | 53.051 | H |
| ATOM | 5698 | O  | HOH A | 1 | 4.013  | 46.913 | 9.748  | O |
| ATOM | 5699 | H1 | HOH A | 2 | 3.200  | 46.456 | 10.050 | H |
| ATOM | 5700 | H2 | HOH A | 3 | 4.011  | 46.917 | 8.768  | H |
| ATOM | 5701 | O  | HOH A | 1 | 3.977  | 46.954 | 31.892 | O |
| ATOM | 5702 | H1 | HOH A | 2 | 3.171  | 46.483 | 32.191 | H |
| ATOM | 5703 | H2 | HOH A | 3 | 3.980  | 46.956 | 30.912 | H |
| ATOM | 5704 | O  | HOH A | 1 | 3.986  | 46.980 | 54.023 | O |
| ATOM | 5705 | H1 | HOH A | 2 | 3.176  | 46.520 | 54.327 | H |
| ATOM | 5706 | H2 | HOH A | 3 | 3.978  | 46.990 | 53.043 | H |
| ATOM | 5707 | O  | HOH A | 1 | 26.593 | 47.069 | 9.753  | O |
| ATOM | 5708 | H1 | HOH A | 2 | 25.792 | 46.594 | 10.055 | H |
| ATOM | 5709 | H2 | HOH A | 3 | 26.585 | 47.084 | 8.773  | H |
| ATOM | 5710 | O  | HOH A | 1 | 26.597 | 46.938 | 31.898 | O |
| ATOM | 5711 | H1 | HOH A | 2 | 25.792 | 46.466 | 32.198 | H |
| ATOM | 5712 | H2 | HOH A | 3 | 26.592 | 46.953 | 30.918 | H |
| ATOM | 5713 | O  | HOH A | 1 | 26.596 | 47.036 | 53.979 | O |
| ATOM | 5714 | H1 | HOH A | 2 | 25.790 | 46.569 | 54.285 | H |
| ATOM | 5715 | H2 | HOH A | 3 | 26.593 | 47.031 | 52.999 | H |
| ATOM | 5716 | O  | HOH A | 1 | 49.196 | 47.090 | 9.697  | O |
| ATOM | 5717 | H1 | HOH A | 2 | 48.387 | 46.626 | 10.000 | H |
| ATOM | 5718 | H2 | HOH A | 3 | 49.190 | 47.100 | 8.717  | H |
| ATOM | 5719 | O  | HOH A | 1 | 49.218 | 46.937 | 31.812 | O |
| ATOM | 5720 | H1 | HOH A | 2 | 48.416 | 46.466 | 32.120 | H |
| ATOM | 5721 | H2 | HOH A | 3 | 49.206 | 46.947 | 30.832 | H |
| ATOM | 5722 | O  | HOH A | 1 | 49.203 | 47.080 | 53.961 | O |
| ATOM | 5723 | H1 | HOH A | 2 | 48.395 | 46.620 | 54.271 | H |
| ATOM | 5724 | H2 | HOH A | 3 | 49.198 | 47.075 | 52.981 | H |
| ATOM | 5725 | O  | HOH A | 1 | 8.520  | 46.857 | 9.772  | O |
| ATOM | 5726 | H1 | HOH A | 2 | 8.521  | 47.784 | 10.092 | H |

|      |      |    |       |   |        |        |        |   |
|------|------|----|-------|---|--------|--------|--------|---|
| ATOM | 5727 | H2 | HOH A | 3 | 8.522  | 46.874 | 8.793  | H |
| ATOM | 5728 | O  | HOH A | 1 | 8.500  | 46.877 | 31.935 | O |
| ATOM | 5729 | H1 | HOH A | 2 | 8.485  | 47.802 | 32.257 | H |
| ATOM | 5730 | H2 | HOH A | 3 | 8.505  | 46.897 | 30.955 | H |
| ATOM | 5731 | O  | HOH A | 1 | 8.493  | 46.941 | 54.056 | O |
| ATOM | 5732 | H1 | HOH A | 2 | 8.477  | 47.869 | 54.373 | H |
| ATOM | 5733 | H2 | HOH A | 3 | 8.498  | 46.956 | 53.076 | H |
| ATOM | 5734 | O  | HOH A | 1 | 31.106 | 47.044 | 9.779  | O |
| ATOM | 5735 | H1 | HOH A | 2 | 31.092 | 47.970 | 10.101 | H |
| ATOM | 5736 | H2 | HOH A | 3 | 31.101 | 47.065 | 8.799  | H |
| ATOM | 5737 | O  | HOH A | 1 | 31.125 | 46.871 | 31.926 | O |
| ATOM | 5738 | H1 | HOH A | 2 | 31.108 | 47.800 | 32.241 | H |
| ATOM | 5739 | H2 | HOH A | 3 | 31.126 | 46.883 | 30.946 | H |
| ATOM | 5740 | O  | HOH A | 1 | 31.123 | 46.997 | 54.006 | O |
| ATOM | 5741 | H1 | HOH A | 2 | 31.111 | 47.925 | 54.319 | H |
| ATOM | 5742 | H2 | HOH A | 3 | 31.127 | 47.007 | 53.026 | H |
| ATOM | 5743 | O  | HOH A | 1 | 53.715 | 46.991 | 9.713  | O |
| ATOM | 5744 | H1 | HOH A | 2 | 53.703 | 47.920 | 10.025 | H |
| ATOM | 5745 | H2 | HOH A | 3 | 53.717 | 47.001 | 8.733  | H |
| ATOM | 5746 | O  | HOH A | 1 | 53.746 | 46.880 | 31.854 | O |
| ATOM | 5747 | H1 | HOH A | 2 | 53.732 | 47.806 | 32.176 | H |
| ATOM | 5748 | H2 | HOH A | 3 | 53.748 | 46.900 | 30.875 | H |
| ATOM | 5749 | O  | HOH A | 1 | 53.723 | 46.999 | 53.991 | O |
| ATOM | 5750 | H1 | HOH A | 2 | 53.709 | 47.930 | 54.297 | H |
| ATOM | 5751 | H2 | HOH A | 3 | 53.725 | 47.002 | 53.011 | H |
| ATOM | 5752 | O  | HOH A | 1 | 13.031 | 46.932 | 9.768  | O |
| ATOM | 5753 | H1 | HOH A | 2 | 13.835 | 46.468 | 10.081 | H |
| ATOM | 5754 | H2 | HOH A | 3 | 13.034 | 46.916 | 8.788  | H |
| ATOM | 5755 | O  | HOH A | 1 | 13.031 | 46.941 | 31.929 | O |
| ATOM | 5756 | H1 | HOH A | 2 | 13.831 | 46.472 | 32.247 | H |
| ATOM | 5757 | H2 | HOH A | 3 | 13.035 | 46.917 | 30.949 | H |
| ATOM | 5758 | O  | HOH A | 1 | 13.026 | 46.992 | 54.023 | O |
| ATOM | 5759 | H1 | HOH A | 2 | 13.825 | 46.521 | 54.341 | H |
| ATOM | 5760 | H2 | HOH A | 3 | 13.026 | 46.961 | 53.043 | H |
| ATOM | 5761 | O  | HOH A | 1 | 35.633 | 47.131 | 9.755  | O |
| ATOM | 5762 | H1 | HOH A | 2 | 36.429 | 46.656 | 10.071 | H |

|      |      |    |       |   |        |        |        |   |
|------|------|----|-------|---|--------|--------|--------|---|
| ATOM | 5763 | H2 | HOH A | 3 | 35.638 | 47.113 | 8.775  | H |
| ATOM | 5764 | O  | HOH A | 1 | 35.657 | 46.938 | 31.897 | O |
| ATOM | 5765 | H1 | HOH A | 2 | 36.452 | 46.461 | 32.215 | H |
| ATOM | 5766 | H2 | HOH A | 3 | 35.662 | 46.915 | 30.917 | H |
| ATOM | 5767 | O  | HOH A | 1 | 35.656 | 47.066 | 53.969 | O |
| ATOM | 5768 | H1 | HOH A | 2 | 36.451 | 46.600 | 54.302 | H |
| ATOM | 5769 | H2 | HOH A | 3 | 35.672 | 47.030 | 52.989 | H |
| ATOM | 5770 | O  | HOH A | 1 | 58.249 | 46.998 | 9.710  | O |
| ATOM | 5771 | H1 | HOH A | 2 | 59.046 | 46.524 | 10.028 | H |
| ATOM | 5772 | H2 | HOH A | 3 | 58.257 | 46.980 | 8.730  | H |
| ATOM | 5773 | O  | HOH A | 1 | 58.263 | 46.941 | 31.839 | O |
| ATOM | 5774 | H1 | HOH A | 2 | 59.058 | 46.469 | 32.161 | H |
| ATOM | 5775 | H2 | HOH A | 3 | 58.270 | 46.914 | 30.859 | H |
| ATOM | 5776 | O  | HOH A | 1 | 58.253 | 47.040 | 53.991 | O |
| ATOM | 5777 | H1 | HOH A | 2 | 59.048 | 46.563 | 54.309 | H |
| ATOM | 5778 | H2 | HOH A | 3 | 58.256 | 47.014 | 53.011 | H |
| ATOM | 5779 | O  | HOH A | 1 | 17.545 | 46.877 | 9.789  | O |
| ATOM | 5780 | H1 | HOH A | 2 | 17.549 | 47.810 | 10.091 | H |
| ATOM | 5781 | H2 | HOH A | 3 | 17.543 | 46.877 | 8.809  | H |
| ATOM | 5782 | O  | HOH A | 1 | 17.517 | 46.861 | 31.936 | O |
| ATOM | 5783 | H1 | HOH A | 2 | 17.514 | 47.790 | 32.247 | H |
| ATOM | 5784 | H2 | HOH A | 3 | 17.522 | 46.870 | 30.956 | H |
| ATOM | 5785 | O  | HOH A | 1 | 17.532 | 46.907 | 54.030 | O |
| ATOM | 5786 | H1 | HOH A | 2 | 17.533 | 47.839 | 54.334 | H |
| ATOM | 5787 | H2 | HOH A | 3 | 17.543 | 46.909 | 53.050 | H |
| ATOM | 5788 | O  | HOH A | 1 | 40.131 | 47.049 | 9.754  | O |
| ATOM | 5789 | H1 | HOH A | 2 | 40.131 | 47.978 | 10.065 | H |
| ATOM | 5790 | H2 | HOH A | 3 | 40.144 | 47.057 | 8.774  | H |
| ATOM | 5791 | O  | HOH A | 1 | 40.162 | 46.844 | 31.884 | O |
| ATOM | 5792 | H1 | HOH A | 2 | 40.167 | 47.773 | 32.196 | H |
| ATOM | 5793 | H2 | HOH A | 3 | 40.162 | 46.854 | 30.904 | H |
| ATOM | 5794 | O  | HOH A | 1 | 40.147 | 47.000 | 53.985 | O |
| ATOM | 5795 | H1 | HOH A | 2 | 40.144 | 47.932 | 54.286 | H |
| ATOM | 5796 | H2 | HOH A | 3 | 40.156 | 46.998 | 53.005 | H |
| ATOM | 5797 | O  | HOH A | 1 | 62.747 | 46.858 | 9.733  | O |
| ATOM | 5798 | H1 | HOH A | 2 | 62.747 | 47.789 | 10.040 | H |

|      |      |    |       |   |        |        |        |   |
|------|------|----|-------|---|--------|--------|--------|---|
| ATOM | 5799 | H2 | HOH A | 3 | 62.758 | 46.862 | 8.753  | H |
| ATOM | 5800 | O  | HOH A | 1 | 62.743 | 46.845 | 31.868 | O |
| ATOM | 5801 | H1 | HOH A | 2 | 62.736 | 47.773 | 32.182 | H |
| ATOM | 5802 | H2 | HOH A | 3 | 62.746 | 46.856 | 30.888 | H |
| ATOM | 5803 | O  | HOH A | 1 | 62.739 | 46.928 | 54.022 | O |
| ATOM | 5804 | H1 | HOH A | 2 | 62.733 | 47.861 | 54.323 | H |
| ATOM | 5805 | H2 | HOH A | 3 | 62.752 | 46.926 | 53.042 | H |
| ATOM | 5806 | O  | HOH A | 1 | 1.723  | 27.352 | 9.738  | O |
| ATOM | 5807 | H1 | HOH A | 2 | 2.527  | 26.884 | 10.047 | H |
| ATOM | 5808 | H2 | HOH A | 3 | 0.941  | 26.872 | 10.084 | H |
| ATOM | 5809 | O  | HOH A | 1 | 1.716  | 27.374 | 31.893 | O |
| ATOM | 5810 | H1 | HOH A | 2 | 2.520  | 26.910 | 32.207 | H |
| ATOM | 5811 | H2 | HOH A | 3 | 0.935  | 26.894 | 32.240 | H |
| ATOM | 5812 | O  | HOH A | 1 | 1.715  | 27.421 | 54.023 | O |
| ATOM | 5813 | H1 | HOH A | 2 | 2.511  | 26.946 | 54.340 | H |
| ATOM | 5814 | H2 | HOH A | 3 | 0.926  | 26.954 | 54.368 | H |
| ATOM | 5815 | O  | HOH A | 1 | 24.322 | 27.486 | 9.778  | O |
| ATOM | 5816 | H1 | HOH A | 2 | 25.126 | 27.020 | 10.089 | H |
| ATOM | 5817 | H2 | HOH A | 3 | 23.541 | 27.003 | 10.117 | H |
| ATOM | 5818 | O  | HOH A | 1 | 24.311 | 27.368 | 31.920 | O |
| ATOM | 5819 | H1 | HOH A | 2 | 25.111 | 26.897 | 32.231 | H |
| ATOM | 5820 | H2 | HOH A | 3 | 23.526 | 26.894 | 32.266 | H |
| ATOM | 5821 | O  | HOH A | 1 | 24.315 | 27.468 | 54.000 | O |
| ATOM | 5822 | H1 | HOH A | 2 | 25.115 | 26.996 | 54.311 | H |
| ATOM | 5823 | H2 | HOH A | 3 | 23.530 | 26.992 | 54.344 | H |
| ATOM | 5824 | O  | HOH A | 1 | 46.919 | 27.540 | 9.700  | O |
| ATOM | 5825 | H1 | HOH A | 2 | 47.718 | 27.068 | 10.014 | H |
| ATOM | 5826 | H2 | HOH A | 3 | 46.132 | 27.069 | 10.046 | H |
| ATOM | 5827 | O  | HOH A | 1 | 46.943 | 27.361 | 31.838 | O |
| ATOM | 5828 | H1 | HOH A | 2 | 47.743 | 26.891 | 32.151 | H |
| ATOM | 5829 | H2 | HOH A | 3 | 46.158 | 26.885 | 32.181 | H |
| ATOM | 5830 | O  | HOH A | 1 | 46.932 | 27.523 | 53.971 | O |
| ATOM | 5831 | H1 | HOH A | 2 | 47.732 | 27.054 | 54.289 | H |
| ATOM | 5832 | H2 | HOH A | 3 | 46.147 | 27.050 | 54.317 | H |
| ATOM | 5833 | O  | HOH A | 1 | 6.300  | 27.308 | 9.767  | O |
| ATOM | 5834 | H1 | HOH A | 2 | 6.319  | 28.234 | 10.089 | H |

|      |      |    |       |   |        |        |        |   |
|------|------|----|-------|---|--------|--------|--------|---|
| ATOM | 5835 | H2 | HOH A | 3 | 6.296  | 27.329 | 8.787  | H |
| ATOM | 5836 | O  | HOH A | 1 | 6.272  | 27.348 | 31.914 | O |
| ATOM | 5837 | H1 | HOH A | 2 | 6.294  | 28.276 | 32.227 | H |
| ATOM | 5838 | H2 | HOH A | 3 | 6.248  | 27.359 | 30.934 | H |
| ATOM | 5839 | O  | HOH A | 1 | 6.253  | 27.405 | 54.035 | O |
| ATOM | 5840 | H1 | HOH A | 2 | 6.268  | 28.332 | 54.352 | H |
| ATOM | 5841 | H2 | HOH A | 3 | 6.236  | 27.420 | 53.055 | H |
| ATOM | 5842 | O  | HOH A | 1 | 28.870 | 27.497 | 9.776  | O |
| ATOM | 5843 | H1 | HOH A | 2 | 28.888 | 28.422 | 10.098 | H |
| ATOM | 5844 | H2 | HOH A | 3 | 28.853 | 27.519 | 8.796  | H |
| ATOM | 5845 | O  | HOH A | 1 | 28.884 | 27.348 | 31.939 | O |
| ATOM | 5846 | H1 | HOH A | 2 | 28.906 | 28.275 | 32.259 | H |
| ATOM | 5847 | H2 | HOH A | 3 | 28.869 | 27.366 | 30.960 | H |
| ATOM | 5848 | O  | HOH A | 1 | 28.879 | 27.449 | 54.022 | O |
| ATOM | 5849 | H1 | HOH A | 2 | 28.903 | 28.376 | 54.337 | H |
| ATOM | 5850 | H2 | HOH A | 3 | 28.864 | 27.462 | 53.042 | H |
| ATOM | 5851 | O  | HOH A | 1 | 51.469 | 27.474 | 9.719  | O |
| ATOM | 5852 | H1 | HOH A | 2 | 51.497 | 28.400 | 10.041 | H |
| ATOM | 5853 | H2 | HOH A | 3 | 51.458 | 27.495 | 8.739  | H |
| ATOM | 5854 | O  | HOH A | 1 | 51.503 | 27.344 | 31.847 | O |
| ATOM | 5855 | H1 | HOH A | 2 | 51.526 | 28.269 | 32.171 | H |
| ATOM | 5856 | H2 | HOH A | 3 | 51.491 | 27.366 | 30.868 | H |
| ATOM | 5857 | O  | HOH A | 1 | 51.490 | 27.481 | 53.987 | O |
| ATOM | 5858 | H1 | HOH A | 2 | 51.506 | 28.411 | 54.294 | H |
| ATOM | 5859 | H2 | HOH A | 3 | 51.474 | 27.485 | 53.007 | H |
| ATOM | 5860 | O  | HOH A | 1 | 10.807 | 27.322 | 9.777  | O |
| ATOM | 5861 | H1 | HOH A | 2 | 11.605 | 26.856 | 10.101 | H |
| ATOM | 5862 | H2 | HOH A | 3 | 10.020 | 26.836 | 10.101 | H |
| ATOM | 5863 | O  | HOH A | 1 | 10.764 | 27.334 | 31.939 | O |
| ATOM | 5864 | H1 | HOH A | 2 | 11.561 | 26.862 | 32.260 | H |
| ATOM | 5865 | H2 | HOH A | 3 | 9.975  | 26.851 | 32.262 | H |
| ATOM | 5866 | O  | HOH A | 1 | 10.766 | 27.388 | 54.069 | O |
| ATOM | 5867 | H1 | HOH A | 2 | 11.561 | 26.917 | 54.395 | H |
| ATOM | 5868 | H2 | HOH A | 3 | 9.976  | 26.907 | 54.394 | H |
| ATOM | 5869 | O  | HOH A | 1 | 33.376 | 27.509 | 9.785  | O |
| ATOM | 5870 | H1 | HOH A | 2 | 34.174 | 27.041 | 10.109 | H |

|      |      |    |       |   |        |        |        |   |
|------|------|----|-------|---|--------|--------|--------|---|
| ATOM | 5871 | H2 | HOH A | 3 | 32.588 | 27.028 | 10.115 | H |
| ATOM | 5872 | O  | HOH A | 1 | 33.385 | 27.319 | 31.926 | O |
| ATOM | 5873 | H1 | HOH A | 2 | 34.186 | 26.852 | 32.246 | H |
| ATOM | 5874 | H2 | HOH A | 3 | 32.600 | 26.831 | 32.252 | H |
| ATOM | 5875 | O  | HOH A | 1 | 33.396 | 27.455 | 53.999 | O |
| ATOM | 5876 | H1 | HOH A | 2 | 34.193 | 26.988 | 54.327 | H |
| ATOM | 5877 | H2 | HOH A | 3 | 32.607 | 26.978 | 54.331 | H |
| ATOM | 5878 | O  | HOH A | 1 | 55.980 | 27.413 | 9.719  | O |
| ATOM | 5879 | H1 | HOH A | 2 | 56.772 | 26.933 | 10.039 | H |
| ATOM | 5880 | H2 | HOH A | 3 | 55.186 | 26.940 | 10.046 | H |
| ATOM | 5881 | O  | HOH A | 1 | 55.993 | 27.335 | 31.863 | O |
| ATOM | 5882 | H1 | HOH A | 2 | 56.793 | 26.870 | 32.188 | H |
| ATOM | 5883 | H2 | HOH A | 3 | 55.207 | 26.848 | 32.189 | H |
| ATOM | 5884 | O  | HOH A | 1 | 55.990 | 27.445 | 54.011 | O |
| ATOM | 5885 | H1 | HOH A | 2 | 56.790 | 26.978 | 54.330 | H |
| ATOM | 5886 | H2 | HOH A | 3 | 55.205 | 26.960 | 54.340 | H |
| ATOM | 5887 | O  | HOH A | 1 | 15.348 | 27.358 | 9.785  | O |
| ATOM | 5888 | H1 | HOH A | 2 | 14.555 | 26.876 | 10.100 | H |
| ATOM | 5889 | H2 | HOH A | 3 | 15.335 | 27.353 | 8.805  | H |
| ATOM | 5890 | O  | HOH A | 1 | 15.316 | 27.357 | 31.945 | O |
| ATOM | 5891 | H1 | HOH A | 2 | 14.519 | 26.882 | 32.261 | H |
| ATOM | 5892 | H2 | HOH A | 3 | 15.307 | 27.346 | 30.965 | H |
| ATOM | 5893 | O  | HOH A | 1 | 15.330 | 27.400 | 54.037 | O |
| ATOM | 5894 | H1 | HOH A | 2 | 14.533 | 26.928 | 54.356 | H |
| ATOM | 5895 | H2 | HOH A | 3 | 15.324 | 27.376 | 53.057 | H |
| ATOM | 5896 | O  | HOH A | 1 | 37.918 | 27.534 | 9.766  | O |
| ATOM | 5897 | H1 | HOH A | 2 | 37.122 | 27.061 | 10.089 | H |
| ATOM | 5898 | H2 | HOH A | 3 | 37.896 | 27.530 | 8.786  | H |
| ATOM | 5899 | O  | HOH A | 1 | 37.958 | 27.336 | 31.886 | O |
| ATOM | 5900 | H1 | HOH A | 2 | 37.164 | 26.858 | 32.204 | H |
| ATOM | 5901 | H2 | HOH A | 3 | 37.944 | 27.328 | 30.906 | H |
| ATOM | 5902 | O  | HOH A | 1 | 37.942 | 27.494 | 53.970 | O |
| ATOM | 5903 | H1 | HOH A | 2 | 37.146 | 27.019 | 54.291 | H |
| ATOM | 5904 | H2 | HOH A | 3 | 37.937 | 27.466 | 52.991 | H |
| ATOM | 5905 | O  | HOH A | 1 | 60.535 | 27.384 | 9.729  | O |
| ATOM | 5906 | H1 | HOH A | 2 | 59.732 | 26.915 | 10.040 | H |



|      |      |    |       |   |        |        |        |   |
|------|------|----|-------|---|--------|--------|--------|---|
| ATOM | 5907 | H2 | HOH A | 3 | 60.527 | 27.382 | 8.749  | H |
| ATOM | 5908 | O  | HOH A | 1 | 60.541 | 27.346 | 31.861 | O |
| ATOM | 5909 | H1 | HOH A | 2 | 59.744 | 26.870 | 32.175 | H |
| ATOM | 5910 | H2 | HOH A | 3 | 60.531 | 27.340 | 30.881 | H |
| ATOM | 5911 | O  | HOH A | 1 | 60.535 | 27.443 | 54.002 | O |
| ATOM | 5912 | H1 | HOH A | 2 | 59.733 | 26.977 | 54.320 | H |
| ATOM | 5913 | H2 | HOH A | 3 | 60.529 | 27.421 | 53.022 | H |
| ATOM | 5914 | O  | HOH A | 1 | 19.815 | 27.389 | 9.774  | O |
| ATOM | 5915 | H1 | HOH A | 2 | 19.019 | 26.922 | 10.102 | H |
| ATOM | 5916 | H2 | HOH A | 3 | 19.789 | 28.307 | 10.114 | H |
| ATOM | 5917 | O  | HOH A | 1 | 19.787 | 27.340 | 31.928 | O |
| ATOM | 5918 | H1 | HOH A | 2 | 18.990 | 26.875 | 32.255 | H |
| ATOM | 5919 | H2 | HOH A | 3 | 19.761 | 28.260 | 32.265 | H |
| ATOM | 5920 | O  | HOH A | 1 | 19.800 | 27.404 | 54.011 | O |
| ATOM | 5921 | H1 | HOH A | 2 | 19.001 | 26.940 | 54.337 | H |
| ATOM | 5922 | H2 | HOH A | 3 | 19.782 | 28.320 | 54.358 | H |
| ATOM | 5923 | O  | HOH A | 1 | 42.408 | 27.520 | 9.720  | O |
| ATOM | 5924 | H1 | HOH A | 2 | 41.608 | 27.056 | 10.045 | H |
| ATOM | 5925 | H2 | HOH A | 3 | 42.385 | 28.439 | 10.061 | H |
| ATOM | 5926 | O  | HOH A | 1 | 42.429 | 27.321 | 31.847 | O |
| ATOM | 5927 | H1 | HOH A | 2 | 41.625 | 26.867 | 32.175 | H |
| ATOM | 5928 | H2 | HOH A | 3 | 42.421 | 28.238 | 32.190 | H |
| ATOM | 5929 | O  | HOH A | 1 | 42.417 | 27.477 | 53.963 | O |
| ATOM | 5930 | H1 | HOH A | 2 | 41.618 | 27.014 | 54.293 | H |
| ATOM | 5931 | H2 | HOH A | 3 | 42.389 | 28.400 | 54.292 | H |
| ATOM | 5932 | O  | HOH A | 1 | 65.009 | 27.333 | 9.733  | O |
| ATOM | 5933 | H1 | HOH A | 2 | 64.212 | 26.866 | 10.058 | H |
| ATOM | 5934 | H2 | HOH A | 3 | 64.979 | 28.254 | 10.068 | H |
| ATOM | 5935 | O  | HOH A | 1 | 65.017 | 27.319 | 31.858 | O |
| ATOM | 5936 | H1 | HOH A | 2 | 64.215 | 26.856 | 32.181 | H |
| ATOM | 5937 | H2 | HOH A | 3 | 64.992 | 28.238 | 32.197 | H |
| ATOM | 5938 | O  | HOH A | 1 | 64.994 | 27.413 | 54.016 | O |
| ATOM | 5939 | H1 | HOH A | 2 | 64.195 | 26.951 | 54.343 | H |
| ATOM | 5940 | H2 | HOH A | 3 | 64.970 | 28.333 | 54.352 | H |
| ATOM | 5941 | O  | HOH A | 1 | 22.065 | 31.355 | 9.790  | O |
| ATOM | 5942 | H1 | HOH A | 2 | 21.271 | 30.893 | 10.128 | H |

|      |      |    |       |   |        |        |        |   |
|------|------|----|-------|---|--------|--------|--------|---|
| ATOM | 5943 | H2 | HOH A | 3 | 22.040 | 32.279 | 10.117 | H |
| ATOM | 5944 | O  | HOH A | 1 | 22.059 | 31.271 | 31.943 | O |
| ATOM | 5945 | H1 | HOH A | 2 | 21.260 | 30.811 | 32.274 | H |
| ATOM | 5946 | H2 | HOH A | 3 | 22.032 | 32.196 | 32.265 | H |
| ATOM | 5947 | O  | HOH A | 1 | 22.067 | 31.346 | 54.024 | O |
| ATOM | 5948 | H1 | HOH A | 2 | 21.270 | 30.884 | 54.359 | H |
| ATOM | 5949 | H2 | HOH A | 3 | 22.039 | 32.270 | 54.349 | H |
| ATOM | 5950 | O  | HOH A | 1 | 44.655 | 31.462 | 9.718  | O |
| ATOM | 5951 | H1 | HOH A | 2 | 43.857 | 31.001 | 10.051 | H |
| ATOM | 5952 | H2 | HOH A | 3 | 44.633 | 32.384 | 10.050 | H |
| ATOM | 5953 | O  | HOH A | 1 | 44.711 | 31.265 | 31.836 | O |
| ATOM | 5954 | H1 | HOH A | 2 | 43.917 | 30.805 | 32.179 | H |
| ATOM | 5955 | H2 | HOH A | 3 | 44.696 | 32.186 | 32.169 | H |
| ATOM | 5956 | O  | HOH A | 1 | 44.669 | 31.417 | 53.964 | O |
| ATOM | 5957 | H1 | HOH A | 2 | 43.871 | 30.960 | 54.303 | H |
| ATOM | 5958 | H2 | HOH A | 3 | 44.647 | 32.343 | 54.283 | H |
| ATOM | 5959 | O  | HOH A | 1 | 67.277 | 31.256 | 9.749  | O |
| ATOM | 5960 | H1 | HOH A | 2 | 66.475 | 30.799 | 10.080 | H |
| ATOM | 5961 | H2 | HOH A | 3 | 67.252 | 32.181 | 10.070 | H |
| ATOM | 5962 | O  | HOH A | 1 | 67.262 | 31.279 | 31.874 | O |
| ATOM | 5963 | H1 | HOH A | 2 | 66.464 | 30.816 | 32.203 | H |
| ATOM | 5964 | H2 | HOH A | 3 | 67.231 | 32.203 | 32.200 | H |
| ATOM | 5965 | O  | HOH A | 1 | 67.261 | 31.343 | 54.025 | O |
| ATOM | 5966 | H1 | HOH A | 2 | 66.463 | 30.886 | 54.364 | H |
| ATOM | 5967 | H2 | HOH A | 3 | 67.243 | 32.267 | 54.351 | H |
| ATOM | 5968 | O  | HOH A | 1 | 4.024  | 31.233 | 9.766  | O |
| ATOM | 5969 | H1 | HOH A | 2 | 4.808  | 30.762 | 10.117 | H |
| ATOM | 5970 | H2 | HOH A | 3 | 3.222  | 30.770 | 10.088 | H |
| ATOM | 5971 | O  | HOH A | 1 | 4.011  | 31.271 | 31.902 | O |
| ATOM | 5972 | H1 | HOH A | 2 | 4.796  | 30.798 | 32.248 | H |
| ATOM | 5973 | H2 | HOH A | 3 | 3.211  | 30.804 | 32.222 | H |
| ATOM | 5974 | O  | HOH A | 1 | 3.994  | 31.327 | 54.032 | O |
| ATOM | 5975 | H1 | HOH A | 2 | 4.779  | 30.855 | 54.379 | H |
| ATOM | 5976 | H2 | HOH A | 3 | 3.194  | 30.858 | 54.351 | H |
| ATOM | 5977 | O  | HOH A | 1 | 26.609 | 31.399 | 9.774  | O |
| ATOM | 5978 | H1 | HOH A | 2 | 27.398 | 30.930 | 10.116 | H |

|      |      |    |       |   |        |        |        |   |
|------|------|----|-------|---|--------|--------|--------|---|
| ATOM | 5979 | H2 | HOH A | 3 | 25.813 | 30.927 | 10.096 | H |
| ATOM | 5980 | O  | HOH A | 1 | 26.626 | 31.262 | 31.920 | O |
| ATOM | 5981 | H1 | HOH A | 2 | 27.415 | 30.794 | 32.266 | H |
| ATOM | 5982 | H2 | HOH A | 3 | 25.829 | 30.791 | 32.243 | H |
| ATOM | 5983 | O  | HOH A | 1 | 26.625 | 31.356 | 54.010 | O |
| ATOM | 5984 | H1 | HOH A | 2 | 27.413 | 30.887 | 54.356 | H |
| ATOM | 5985 | H2 | HOH A | 3 | 25.827 | 30.888 | 54.333 | H |
| ATOM | 5986 | O  | HOH A | 1 | 49.221 | 31.424 | 9.712  | O |
| ATOM | 5987 | H1 | HOH A | 2 | 50.005 | 30.949 | 10.059 | H |
| ATOM | 5988 | H2 | HOH A | 3 | 48.419 | 30.960 | 10.034 | H |
| ATOM | 5989 | O  | HOH A | 1 | 49.255 | 31.257 | 31.826 | O |
| ATOM | 5990 | H1 | HOH A | 2 | 50.044 | 30.790 | 32.171 | H |
| ATOM | 5991 | H2 | HOH A | 3 | 48.459 | 30.789 | 32.155 | H |
| ATOM | 5992 | O  | HOH A | 1 | 49.226 | 31.413 | 53.976 | O |
| ATOM | 5993 | H1 | HOH A | 2 | 50.013 | 30.940 | 54.318 | H |
| ATOM | 5994 | H2 | HOH A | 3 | 48.428 | 30.946 | 54.299 | H |
| ATOM | 5995 | O  | HOH A | 1 | 8.552  | 31.200 | 9.758  | O |
| ATOM | 5996 | H1 | HOH A | 2 | 9.351  | 30.749 | 10.101 | H |
| ATOM | 5997 | H2 | HOH A | 3 | 8.559  | 32.123 | 10.088 | H |
| ATOM | 5998 | O  | HOH A | 1 | 8.517  | 31.245 | 31.902 | O |
| ATOM | 5999 | H1 | HOH A | 2 | 9.317  | 30.793 | 32.244 | H |
| ATOM | 6000 | H2 | HOH A | 3 | 8.525  | 32.166 | 32.236 | H |
| ATOM | 6001 | O  | HOH A | 1 | 8.516  | 31.288 | 54.025 | O |
| ATOM | 6002 | H1 | HOH A | 2 | 9.316  | 30.840 | 54.370 | H |
| ATOM | 6003 | H2 | HOH A | 3 | 8.520  | 32.211 | 54.354 | H |
| ATOM | 6004 | O  | HOH A | 1 | 31.130 | 31.403 | 9.760  | O |
| ATOM | 6005 | H1 | HOH A | 2 | 31.933 | 30.959 | 10.102 | H |
| ATOM | 6006 | H2 | HOH A | 3 | 31.129 | 32.325 | 10.091 | H |
| ATOM | 6007 | O  | HOH A | 1 | 31.144 | 31.234 | 31.899 | O |
| ATOM | 6008 | H1 | HOH A | 2 | 31.950 | 30.789 | 32.236 | H |
| ATOM | 6009 | H2 | HOH A | 3 | 31.147 | 32.157 | 32.228 | H |
| ATOM | 6010 | O  | HOH A | 1 | 31.151 | 31.356 | 53.986 | O |
| ATOM | 6011 | H1 | HOH A | 2 | 31.956 | 30.912 | 54.323 | H |
| ATOM | 6012 | H2 | HOH A | 3 | 31.156 | 32.281 | 54.312 | H |
| ATOM | 6013 | O  | HOH A | 1 | 53.728 | 31.338 | 9.682  | O |
| ATOM | 6014 | H1 | HOH A | 2 | 54.528 | 30.889 | 10.027 | H |

|      |      |    |       |   |        |        |        |   |
|------|------|----|-------|---|--------|--------|--------|---|
| ATOM | 6015 | H2 | HOH A | 3 | 53.730 | 32.259 | 10.016 | H |
| ATOM | 6016 | O  | HOH A | 1 | 53.762 | 31.238 | 31.820 | O |
| ATOM | 6017 | H1 | HOH A | 2 | 54.562 | 30.787 | 32.163 | H |
| ATOM | 6018 | H2 | HOH A | 3 | 53.767 | 32.159 | 32.155 | H |
| ATOM | 6019 | O  | HOH A | 1 | 53.740 | 31.366 | 53.966 | O |
| ATOM | 6020 | H1 | HOH A | 2 | 54.538 | 30.916 | 54.314 | H |
| ATOM | 6021 | H2 | HOH A | 3 | 53.743 | 32.288 | 54.298 | H |
| ATOM | 6022 | O  | HOH A | 1 | 13.041 | 31.242 | 9.779  | O |
| ATOM | 6023 | H1 | HOH A | 2 | 13.857 | 30.805 | 10.101 | H |
| ATOM | 6024 | H2 | HOH A | 3 | 13.046 | 32.167 | 10.104 | H |
| ATOM | 6025 | O  | HOH A | 1 | 12.990 | 31.251 | 31.942 | O |
| ATOM | 6026 | H1 | HOH A | 2 | 13.799 | 30.804 | 32.268 | H |
| ATOM | 6027 | H2 | HOH A | 3 | 13.003 | 32.176 | 32.266 | H |
| ATOM | 6028 | O  | HOH A | 1 | 13.007 | 31.301 | 54.035 | O |
| ATOM | 6029 | H1 | HOH A | 2 | 13.819 | 30.858 | 54.358 | H |
| ATOM | 6030 | H2 | HOH A | 3 | 13.020 | 32.228 | 54.352 | H |
| ATOM | 6031 | O  | HOH A | 1 | 35.615 | 31.435 | 9.755  | O |
| ATOM | 6032 | H1 | HOH A | 2 | 36.424 | 30.986 | 10.079 | H |
| ATOM | 6033 | H2 | HOH A | 3 | 35.629 | 32.359 | 10.082 | H |
| ATOM | 6034 | O  | HOH A | 1 | 35.641 | 31.234 | 31.887 | O |
| ATOM | 6035 | H1 | HOH A | 2 | 36.457 | 30.794 | 32.205 | H |
| ATOM | 6036 | H2 | HOH A | 3 | 35.649 | 32.158 | 32.213 | H |
| ATOM | 6037 | O  | HOH A | 1 | 35.625 | 31.378 | 53.964 | O |
| ATOM | 6038 | H1 | HOH A | 2 | 36.439 | 30.937 | 54.286 | H |
| ATOM | 6039 | H2 | HOH A | 3 | 35.633 | 32.303 | 54.288 | H |
| ATOM | 6040 | O  | HOH A | 1 | 58.216 | 31.308 | 9.712  | O |
| ATOM | 6041 | H1 | HOH A | 2 | 59.020 | 30.854 | 10.039 | H |
| ATOM | 6042 | H2 | HOH A | 3 | 58.232 | 32.229 | 10.045 | H |
| ATOM | 6043 | O  | HOH A | 1 | 58.232 | 31.243 | 31.854 | O |
| ATOM | 6044 | H1 | HOH A | 2 | 59.040 | 30.797 | 32.183 | H |
| ATOM | 6045 | H2 | HOH A | 3 | 58.245 | 32.170 | 32.174 | H |
| ATOM | 6046 | O  | HOH A | 1 | 58.209 | 31.357 | 54.000 | O |
| ATOM | 6047 | H1 | HOH A | 2 | 59.017 | 30.905 | 54.319 | H |
| ATOM | 6048 | H2 | HOH A | 3 | 58.224 | 32.277 | 54.337 | H |
| ATOM | 6049 | O  | HOH A | 1 | 17.578 | 31.295 | 9.762  | O |
| ATOM | 6050 | H1 | HOH A | 2 | 16.781 | 30.834 | 10.097 | H |

|      |      |    |       |   |        |        |        |   |
|------|------|----|-------|---|--------|--------|--------|---|
| ATOM | 6051 | H2 | HOH A | 3 | 17.552 | 32.220 | 10.085 | H |
| ATOM | 6052 | O  | HOH A | 1 | 17.533 | 31.244 | 31.917 | O |
| ATOM | 6053 | H1 | HOH A | 2 | 16.724 | 30.794 | 32.239 | H |
| ATOM | 6054 | H2 | HOH A | 3 | 17.511 | 32.171 | 32.235 | H |
| ATOM | 6055 | O  | HOH A | 1 | 17.566 | 31.324 | 54.019 | O |
| ATOM | 6056 | H1 | HOH A | 2 | 16.761 | 30.871 | 54.347 | H |
| ATOM | 6057 | H2 | HOH A | 3 | 17.543 | 32.250 | 54.337 | H |
| ATOM | 6058 | O  | HOH A | 1 | 40.157 | 31.458 | 9.713  | O |
| ATOM | 6059 | H1 | HOH A | 2 | 39.358 | 30.995 | 10.042 | H |
| ATOM | 6060 | H2 | HOH A | 3 | 40.126 | 32.382 | 10.038 | H |
| ATOM | 6061 | O  | HOH A | 1 | 40.206 | 31.242 | 31.847 | O |
| ATOM | 6062 | H1 | HOH A | 2 | 39.403 | 30.787 | 32.176 | H |
| ATOM | 6063 | H2 | HOH A | 3 | 40.183 | 32.167 | 32.170 | H |
| ATOM | 6064 | O  | HOH A | 1 | 40.174 | 31.405 | 53.950 | O |
| ATOM | 6065 | H1 | HOH A | 2 | 39.371 | 30.948 | 54.276 | H |
| ATOM | 6066 | H2 | HOH A | 3 | 40.146 | 32.331 | 54.270 | H |
| ATOM | 6067 | O  | HOH A | 1 | 62.775 | 31.282 | 9.719  | O |
| ATOM | 6068 | H1 | HOH A | 2 | 61.964 | 30.835 | 10.039 | H |
| ATOM | 6069 | H2 | HOH A | 3 | 62.757 | 32.209 | 10.038 | H |
| ATOM | 6070 | O  | HOH A | 1 | 62.778 | 31.245 | 31.843 | O |
| ATOM | 6071 | H1 | HOH A | 2 | 61.971 | 30.793 | 32.165 | H |
| ATOM | 6072 | H2 | HOH A | 3 | 62.756 | 32.171 | 32.165 | H |
| ATOM | 6073 | O  | HOH A | 1 | 62.755 | 31.354 | 53.997 | O |
| ATOM | 6074 | H1 | HOH A | 2 | 61.945 | 30.906 | 54.319 | H |
| ATOM | 6075 | H2 | HOH A | 3 | 62.732 | 32.282 | 54.310 | H |
| ATOM | 6076 | O  | HOH A | 1 | 1.763  | 35.163 | 9.763  | O |
| ATOM | 6077 | H1 | HOH A | 2 | 0.953  | 34.703 | 10.065 | H |
| ATOM | 6078 | H2 | HOH A | 3 | 1.770  | 35.152 | 8.783  | H |
| ATOM | 6079 | O  | HOH A | 1 | 1.723  | 35.187 | 31.902 | O |
| ATOM | 6080 | H1 | HOH A | 2 | 0.910  | 34.729 | 32.200 | H |
| ATOM | 6081 | H2 | HOH A | 3 | 1.739  | 35.172 | 30.923 | H |
| ATOM | 6082 | O  | HOH A | 1 | 1.713  | 35.246 | 54.024 | O |
| ATOM | 6083 | H1 | HOH A | 2 | 0.901  | 34.791 | 54.332 | H |
| ATOM | 6084 | H2 | HOH A | 3 | 1.716  | 35.231 | 53.044 | H |
| ATOM | 6085 | O  | HOH A | 1 | 24.327 | 35.294 | 9.796  | O |
| ATOM | 6086 | H1 | HOH A | 2 | 23.522 | 34.829 | 10.106 | H |

|      |      |    |       |   |        |        |        |   |
|------|------|----|-------|---|--------|--------|--------|---|
| ATOM | 6087 | H2 | HOH A | 3 | 24.324 | 35.285 | 8.816  | H |
| ATOM | 6088 | O  | HOH A | 1 | 24.311 | 35.165 | 31.931 | O |
| ATOM | 6089 | H1 | HOH A | 2 | 23.500 | 34.707 | 32.236 | H |
| ATOM | 6090 | H2 | HOH A | 3 | 24.315 | 35.154 | 30.952 | H |
| ATOM | 6091 | O  | HOH A | 1 | 24.338 | 35.266 | 54.009 | O |
| ATOM | 6092 | H1 | HOH A | 2 | 23.533 | 34.804 | 54.322 | H |
| ATOM | 6093 | H2 | HOH A | 3 | 24.335 | 35.250 | 53.029 | H |
| ATOM | 6094 | O  | HOH A | 1 | 46.923 | 35.353 | 9.720  | O |
| ATOM | 6095 | H1 | HOH A | 2 | 46.113 | 34.897 | 10.029 | H |
| ATOM | 6096 | H2 | HOH A | 3 | 46.926 | 35.334 | 8.740  | H |
| ATOM | 6097 | O  | HOH A | 1 | 46.966 | 35.178 | 31.831 | O |
| ATOM | 6098 | H1 | HOH A | 2 | 46.158 | 34.719 | 32.144 | H |
| ATOM | 6099 | H2 | HOH A | 3 | 46.962 | 35.165 | 30.851 | H |
| ATOM | 6100 | O  | HOH A | 1 | 46.932 | 35.329 | 53.968 | O |
| ATOM | 6101 | H1 | HOH A | 2 | 46.122 | 34.873 | 54.278 | H |
| ATOM | 6102 | H2 | HOH A | 3 | 46.937 | 35.306 | 52.989 | H |
| ATOM | 6103 | O  | HOH A | 1 | 6.274  | 35.153 | 9.757  | O |
| ATOM | 6104 | H1 | HOH A | 2 | 7.062  | 34.680 | 10.098 | H |
| ATOM | 6105 | H2 | HOH A | 3 | 5.476  | 34.692 | 10.092 | H |
| ATOM | 6106 | O  | HOH A | 1 | 6.238  | 35.194 | 31.900 | O |
| ATOM | 6107 | H1 | HOH A | 2 | 7.024  | 34.716 | 32.237 | H |
| ATOM | 6108 | H2 | HOH A | 3 | 5.439  | 34.732 | 32.228 | H |
| ATOM | 6109 | O  | HOH A | 1 | 6.229  | 35.245 | 54.019 | O |
| ATOM | 6110 | H1 | HOH A | 2 | 7.019  | 34.766 | 54.348 | H |
| ATOM | 6111 | H2 | HOH A | 3 | 5.433  | 34.786 | 54.359 | H |
| ATOM | 6112 | O  | HOH A | 1 | 28.832 | 35.340 | 9.767  | O |
| ATOM | 6113 | H1 | HOH A | 2 | 29.623 | 34.867 | 10.101 | H |
| ATOM | 6114 | H2 | HOH A | 3 | 28.037 | 34.876 | 10.104 | H |
| ATOM | 6115 | O  | HOH A | 1 | 28.851 | 35.186 | 31.911 | O |
| ATOM | 6116 | H1 | HOH A | 2 | 29.637 | 34.707 | 32.246 | H |
| ATOM | 6117 | H2 | HOH A | 3 | 28.052 | 34.726 | 32.242 | H |
| ATOM | 6118 | O  | HOH A | 1 | 28.853 | 35.289 | 53.988 | O |
| ATOM | 6119 | H1 | HOH A | 2 | 29.646 | 34.820 | 54.322 | H |
| ATOM | 6120 | H2 | HOH A | 3 | 28.060 | 34.824 | 54.328 | H |
| ATOM | 6121 | O  | HOH A | 1 | 51.442 | 35.321 | 9.692  | O |
| ATOM | 6122 | H1 | HOH A | 2 | 52.226 | 34.836 | 10.025 | H |

|      |      |    |       |   |        |        |        |   |
|------|------|----|-------|---|--------|--------|--------|---|
| ATOM | 6123 | H2 | HOH A | 3 | 50.641 | 34.877 | 10.038 | H |
| ATOM | 6124 | O  | HOH A | 1 | 51.477 | 35.183 | 31.825 | O |
| ATOM | 6125 | H1 | HOH A | 2 | 52.265 | 34.707 | 32.162 | H |
| ATOM | 6126 | H2 | HOH A | 3 | 50.679 | 34.723 | 32.160 | H |
| ATOM | 6127 | O  | HOH A | 1 | 51.461 | 35.319 | 53.963 | O |
| ATOM | 6128 | H1 | HOH A | 2 | 52.246 | 34.840 | 54.300 | H |
| ATOM | 6129 | H2 | HOH A | 3 | 50.661 | 34.864 | 54.300 | H |
| ATOM | 6130 | O  | HOH A | 1 | 10.747 | 35.162 | 9.782  | O |
| ATOM | 6131 | H1 | HOH A | 2 | 11.555 | 34.704 | 10.097 | H |
| ATOM | 6132 | H2 | HOH A | 3 | 10.764 | 35.166 | 8.802  | H |
| ATOM | 6133 | O  | HOH A | 1 | 10.714 | 35.189 | 31.910 | O |
| ATOM | 6134 | H1 | HOH A | 2 | 11.516 | 34.725 | 32.228 | H |
| ATOM | 6135 | H2 | HOH A | 3 | 10.730 | 35.185 | 30.930 | H |
| ATOM | 6136 | O  | HOH A | 1 | 10.725 | 35.237 | 54.025 | O |
| ATOM | 6137 | H1 | HOH A | 2 | 11.529 | 34.776 | 54.344 | H |
| ATOM | 6138 | H2 | HOH A | 3 | 10.742 | 35.232 | 53.045 | H |
| ATOM | 6139 | O  | HOH A | 1 | 33.322 | 35.360 | 9.751  | O |
| ATOM | 6140 | H1 | HOH A | 2 | 34.128 | 34.900 | 10.063 | H |
| ATOM | 6141 | H2 | HOH A | 3 | 33.338 | 35.370 | 8.771  | H |
| ATOM | 6142 | O  | HOH A | 1 | 33.345 | 35.189 | 31.871 | O |
| ATOM | 6143 | H1 | HOH A | 2 | 34.146 | 34.720 | 32.187 | H |
| ATOM | 6144 | H2 | HOH A | 3 | 33.363 | 35.192 | 30.891 | H |
| ATOM | 6145 | O  | HOH A | 1 | 33.347 | 35.318 | 53.969 | O |
| ATOM | 6146 | H1 | HOH A | 2 | 34.149 | 34.856 | 54.291 | H |
| ATOM | 6147 | H2 | HOH A | 3 | 33.358 | 35.298 | 52.990 | H |
| ATOM | 6148 | O  | HOH A | 1 | 55.934 | 35.255 | 9.687  | O |
| ATOM | 6149 | H1 | HOH A | 2 | 56.737 | 34.794 | 10.010 | H |
| ATOM | 6150 | H2 | HOH A | 3 | 55.958 | 35.254 | 8.707  | H |
| ATOM | 6151 | O  | HOH A | 1 | 55.958 | 35.184 | 31.823 | O |
| ATOM | 6152 | H1 | HOH A | 2 | 56.757 | 34.713 | 32.140 | H |
| ATOM | 6153 | H2 | HOH A | 3 | 55.974 | 35.182 | 30.843 | H |
| ATOM | 6154 | O  | HOH A | 1 | 55.943 | 35.305 | 53.981 | O |
| ATOM | 6155 | H1 | HOH A | 2 | 56.741 | 34.834 | 54.301 | H |
| ATOM | 6156 | H2 | HOH A | 3 | 55.960 | 35.298 | 53.001 | H |
| ATOM | 6157 | O  | HOH A | 1 | 15.269 | 35.171 | 9.789  | O |
| ATOM | 6158 | H1 | HOH A | 2 | 15.272 | 36.099 | 10.103 | H |

|      |      |    |       |   |        |        |        |   |
|------|------|----|-------|---|--------|--------|--------|---|
| ATOM | 6159 | H2 | HOH A | 3 | 15.276 | 35.182 | 8.810  | H |
| ATOM | 6160 | O  | HOH A | 1 | 15.227 | 35.150 | 31.942 | O |
| ATOM | 6161 | H1 | HOH A | 2 | 15.230 | 36.078 | 32.257 | H |
| ATOM | 6162 | H2 | HOH A | 3 | 15.226 | 35.163 | 30.962 | H |
| ATOM | 6163 | O  | HOH A | 1 | 15.243 | 35.215 | 54.026 | O |
| ATOM | 6164 | H1 | HOH A | 2 | 15.239 | 36.145 | 54.335 | H |
| ATOM | 6165 | H2 | HOH A | 3 | 15.243 | 35.222 | 53.047 | H |
| ATOM | 6166 | O  | HOH A | 1 | 37.842 | 35.356 | 9.751  | O |
| ATOM | 6167 | H1 | HOH A | 2 | 37.843 | 36.285 | 10.063 | H |
| ATOM | 6168 | H2 | HOH A | 3 | 37.842 | 35.366 | 8.771  | H |
| ATOM | 6169 | O  | HOH A | 1 | 37.879 | 35.144 | 31.855 | O |
| ATOM | 6170 | H1 | HOH A | 2 | 37.881 | 36.069 | 32.178 | H |
| ATOM | 6171 | H2 | HOH A | 3 | 37.885 | 35.165 | 30.875 | H |
| ATOM | 6172 | O  | HOH A | 1 | 37.855 | 35.281 | 53.974 | O |
| ATOM | 6173 | H1 | HOH A | 2 | 37.858 | 36.213 | 54.277 | H |
| ATOM | 6174 | H2 | HOH A | 3 | 37.859 | 35.281 | 52.994 | H |
| ATOM | 6175 | O  | HOH A | 1 | 60.464 | 35.186 | 9.723  | O |
| ATOM | 6176 | H1 | HOH A | 2 | 60.463 | 36.112 | 10.043 | H |
| ATOM | 6177 | H2 | HOH A | 3 | 60.463 | 35.204 | 8.743  | H |
| ATOM | 6178 | O  | HOH A | 1 | 60.467 | 35.144 | 31.848 | O |
| ATOM | 6179 | H1 | HOH A | 2 | 60.469 | 36.073 | 32.159 | H |
| ATOM | 6180 | H2 | HOH A | 3 | 60.474 | 35.151 | 30.868 | H |
| ATOM | 6181 | O  | HOH A | 1 | 60.453 | 35.254 | 54.005 | O |
| ATOM | 6182 | H1 | HOH A | 2 | 60.451 | 36.185 | 54.311 | H |
| ATOM | 6183 | H2 | HOH A | 3 | 60.450 | 35.258 | 53.025 | H |
| ATOM | 6184 | O  | HOH A | 1 | 19.822 | 35.248 | 9.762  | O |
| ATOM | 6185 | H1 | HOH A | 2 | 19.019 | 34.791 | 10.088 | H |
| ATOM | 6186 | H2 | HOH A | 3 | 19.803 | 35.230 | 8.782  | H |
| ATOM | 6187 | O  | HOH A | 1 | 19.787 | 35.190 | 31.898 | O |
| ATOM | 6188 | H1 | HOH A | 2 | 18.978 | 34.738 | 32.217 | H |
| ATOM | 6189 | H2 | HOH A | 3 | 19.776 | 35.173 | 30.918 | H |
| ATOM | 6190 | O  | HOH A | 1 | 19.825 | 35.256 | 53.991 | O |
| ATOM | 6191 | H1 | HOH A | 2 | 19.014 | 34.809 | 54.312 | H |
| ATOM | 6192 | H2 | HOH A | 3 | 19.811 | 35.242 | 53.012 | H |
| ATOM | 6193 | O  | HOH A | 1 | 42.417 | 35.380 | 9.696  | O |
| ATOM | 6194 | H1 | HOH A | 2 | 41.608 | 34.930 | 10.016 | H |



|      |      |    |       |   |        |        |        |   |
|------|------|----|-------|---|--------|--------|--------|---|
| ATOM | 6195 | H2 | HOH A | 3 | 42.403 | 35.368 | 8.716  | H |
| ATOM | 6196 | O  | HOH A | 1 | 42.463 | 35.173 | 31.818 | O |
| ATOM | 6197 | H1 | HOH A | 2 | 41.655 | 34.719 | 32.137 | H |
| ATOM | 6198 | H2 | HOH A | 3 | 42.446 | 35.168 | 30.838 | H |
| ATOM | 6199 | O  | HOH A | 1 | 42.415 | 35.353 | 53.937 | O |
| ATOM | 6200 | H1 | HOH A | 2 | 41.607 | 34.905 | 54.266 | H |
| ATOM | 6201 | H2 | HOH A | 3 | 42.402 | 35.320 | 52.958 | H |
| ATOM | 6202 | O  | HOH A | 1 | 65.038 | 35.216 | 9.716  | O |
| ATOM | 6203 | H1 | HOH A | 2 | 64.226 | 34.770 | 10.034 | H |
| ATOM | 6204 | H2 | HOH A | 3 | 65.027 | 35.203 | 8.736  | H |
| ATOM | 6205 | O  | HOH A | 1 | 65.014 | 35.201 | 31.835 | O |
| ATOM | 6206 | H1 | HOH A | 2 | 64.206 | 34.747 | 32.155 | H |
| ATOM | 6207 | H2 | HOH A | 3 | 65.004 | 35.181 | 30.855 | H |
| ATOM | 6208 | O  | HOH A | 1 | 65.011 | 35.275 | 53.983 | O |
| ATOM | 6209 | H1 | HOH A | 2 | 64.202 | 34.826 | 54.304 | H |
| ATOM | 6210 | H2 | HOH A | 3 | 65.003 | 35.252 | 53.003 | H |
| ATOM | 6211 | O  | HOH A | 1 | 22.051 | 39.194 | 9.743  | O |
| ATOM | 6212 | H1 | HOH A | 2 | 22.850 | 38.735 | 10.077 | H |
| ATOM | 6213 | H2 | HOH A | 3 | 21.265 | 38.725 | 10.092 | H |
| ATOM | 6214 | O  | HOH A | 1 | 22.046 | 39.099 | 31.889 | O |
| ATOM | 6215 | H1 | HOH A | 2 | 22.839 | 38.634 | 32.229 | H |
| ATOM | 6216 | H2 | HOH A | 3 | 21.253 | 38.630 | 32.225 | H |
| ATOM | 6217 | O  | HOH A | 1 | 22.064 | 39.195 | 53.988 | O |
| ATOM | 6218 | H1 | HOH A | 2 | 22.861 | 38.731 | 54.321 | H |
| ATOM | 6219 | H2 | HOH A | 3 | 21.275 | 38.723 | 54.329 | H |
| ATOM | 6220 | O  | HOH A | 1 | 44.646 | 39.294 | 9.680  | O |
| ATOM | 6221 | H1 | HOH A | 2 | 45.444 | 38.829 | 10.008 | H |
| ATOM | 6222 | H2 | HOH A | 3 | 43.858 | 38.824 | 10.024 | H |
| ATOM | 6223 | O  | HOH A | 1 | 44.697 | 39.106 | 31.797 | O |
| ATOM | 6224 | H1 | HOH A | 2 | 45.495 | 38.643 | 32.128 | H |
| ATOM | 6225 | H2 | HOH A | 3 | 43.909 | 38.636 | 32.141 | H |
| ATOM | 6226 | O  | HOH A | 1 | 44.680 | 39.269 | 53.927 | O |
| ATOM | 6227 | H1 | HOH A | 2 | 45.473 | 38.803 | 54.263 | H |
| ATOM | 6228 | H2 | HOH A | 3 | 43.888 | 38.802 | 54.266 | H |
| ATOM | 6229 | O  | HOH A | 1 | 67.276 | 39.108 | 9.718  | O |
| ATOM | 6230 | H1 | HOH A | 2 | 68.070 | 38.639 | 10.048 | H |

|      |      |    |       |   |        |        |        |   |
|------|------|----|-------|---|--------|--------|--------|---|
| ATOM | 6231 | H2 | HOH A | 3 | 66.485 | 38.642 | 10.061 | H |
| ATOM | 6232 | O  | HOH A | 1 | 67.264 | 39.118 | 31.827 | O |
| ATOM | 6233 | H1 | HOH A | 2 | 68.060 | 38.657 | 32.166 | H |
| ATOM | 6234 | H2 | HOH A | 3 | 66.474 | 38.648 | 32.168 | H |
| ATOM | 6235 | O  | HOH A | 1 | 67.246 | 39.186 | 53.986 | O |
| ATOM | 6236 | H1 | HOH A | 2 | 68.037 | 38.710 | 54.316 | H |
| ATOM | 6237 | H2 | HOH A | 3 | 66.452 | 38.722 | 54.322 | H |
| ATOM | 6238 | O  | HOH A | 1 | 4.001  | 39.023 | 9.767  | O |
| ATOM | 6239 | H1 | HOH A | 2 | 4.002  | 39.952 | 10.080 | H |
| ATOM | 6240 | H2 | HOH A | 3 | 3.999  | 39.034 | 8.787  | H |
| ATOM | 6241 | O  | HOH A | 1 | 3.972  | 39.064 | 31.882 | O |
| ATOM | 6242 | H1 | HOH A | 2 | 3.968  | 39.990 | 32.203 | H |
| ATOM | 6243 | H2 | HOH A | 3 | 3.972  | 39.084 | 30.902 | H |
| ATOM | 6244 | O  | HOH A | 1 | 3.961  | 39.107 | 54.033 | O |
| ATOM | 6245 | H1 | HOH A | 2 | 3.964  | 40.036 | 54.344 | H |
| ATOM | 6246 | H2 | HOH A | 3 | 3.958  | 39.115 | 53.053 | H |
| ATOM | 6247 | O  | HOH A | 1 | 26.566 | 39.192 | 9.776  | O |
| ATOM | 6248 | H1 | HOH A | 2 | 26.564 | 40.117 | 10.099 | H |
| ATOM | 6249 | H2 | HOH A | 3 | 26.557 | 39.214 | 8.796  | H |
| ATOM | 6250 | O  | HOH A | 1 | 26.563 | 39.030 | 31.922 | O |
| ATOM | 6251 | H1 | HOH A | 2 | 26.564 | 39.958 | 32.235 | H |
| ATOM | 6252 | H2 | HOH A | 3 | 26.565 | 39.041 | 30.942 | H |
| ATOM | 6253 | O  | HOH A | 1 | 26.584 | 39.158 | 53.999 | O |
| ATOM | 6254 | H1 | HOH A | 2 | 26.584 | 40.088 | 54.308 | H |
| ATOM | 6255 | H2 | HOH A | 3 | 26.574 | 39.165 | 53.019 | H |
| ATOM | 6256 | O  | HOH A | 1 | 49.169 | 39.214 | 9.699  | O |
| ATOM | 6257 | H1 | HOH A | 2 | 49.174 | 40.141 | 10.015 | H |
| ATOM | 6258 | H2 | HOH A | 3 | 49.165 | 39.227 | 8.719  | H |
| ATOM | 6259 | O  | HOH A | 1 | 49.227 | 39.048 | 31.827 | O |
| ATOM | 6260 | H1 | HOH A | 2 | 49.224 | 39.976 | 32.141 | H |
| ATOM | 6261 | H2 | HOH A | 3 | 49.230 | 39.060 | 30.847 | H |
| ATOM | 6262 | O  | HOH A | 1 | 49.184 | 39.200 | 53.952 | O |
| ATOM | 6263 | H1 | HOH A | 2 | 49.178 | 40.129 | 54.265 | H |
| ATOM | 6264 | H2 | HOH A | 3 | 49.184 | 39.211 | 52.972 | H |
| ATOM | 6265 | O  | HOH A | 1 | 8.548  | 39.082 | 9.747  | O |
| ATOM | 6266 | H1 | HOH A | 2 | 9.334  | 38.607 | 10.090 | H |

|      |      |    |       |   |        |        |        |   |
|------|------|----|-------|---|--------|--------|--------|---|
| ATOM | 6267 | H2 | HOH A | 3 | 7.748  | 38.621 | 10.077 | H |
| ATOM | 6268 | O  | HOH A | 1 | 8.511  | 39.104 | 31.893 | O |
| ATOM | 6269 | H1 | HOH A | 2 | 9.295  | 38.624 | 32.232 | H |
| ATOM | 6270 | H2 | HOH A | 3 | 7.710  | 38.645 | 32.222 | H |
| ATOM | 6271 | O  | HOH A | 1 | 8.506  | 39.164 | 54.003 | O |
| ATOM | 6272 | H1 | HOH A | 2 | 9.292  | 38.686 | 54.340 | H |
| ATOM | 6273 | H2 | HOH A | 3 | 7.707  | 38.701 | 54.330 | H |
| ATOM | 6274 | O  | HOH A | 1 | 31.100 | 39.277 | 9.744  | O |
| ATOM | 6275 | H1 | HOH A | 2 | 31.891 | 38.801 | 10.075 | H |
| ATOM | 6276 | H2 | HOH A | 3 | 30.305 | 38.809 | 10.074 | H |
| ATOM | 6277 | O  | HOH A | 1 | 31.126 | 39.106 | 31.864 | O |
| ATOM | 6278 | H1 | HOH A | 2 | 31.914 | 38.628 | 32.196 | H |
| ATOM | 6279 | H2 | HOH A | 3 | 30.328 | 38.642 | 32.193 | H |
| ATOM | 6280 | O  | HOH A | 1 | 31.124 | 39.216 | 53.965 | O |
| ATOM | 6281 | H1 | HOH A | 2 | 31.915 | 38.746 | 54.300 | H |
| ATOM | 6282 | H2 | HOH A | 3 | 30.330 | 38.750 | 54.300 | H |
| ATOM | 6283 | O  | HOH A | 1 | 53.732 | 39.213 | 9.674  | O |
| ATOM | 6284 | H1 | HOH A | 2 | 54.512 | 38.724 | 10.009 | H |
| ATOM | 6285 | H2 | HOH A | 3 | 52.927 | 38.756 | 9.995  | H |
| ATOM | 6286 | O  | HOH A | 1 | 53.762 | 39.101 | 31.801 | O |
| ATOM | 6287 | H1 | HOH A | 2 | 54.551 | 38.622 | 32.130 | H |
| ATOM | 6288 | H2 | HOH A | 3 | 52.965 | 38.633 | 32.128 | H |
| ATOM | 6289 | O  | HOH A | 1 | 53.725 | 39.242 | 53.942 | O |
| ATOM | 6290 | H1 | HOH A | 2 | 54.506 | 38.761 | 54.287 | H |
| ATOM | 6291 | H2 | HOH A | 3 | 52.920 | 38.789 | 54.272 | H |
| ATOM | 6292 | O  | HOH A | 1 | 13.048 | 39.083 | 9.793  | O |
| ATOM | 6293 | H1 | HOH A | 2 | 13.045 | 40.009 | 10.115 | H |
| ATOM | 6294 | H2 | HOH A | 3 | 13.038 | 39.104 | 8.813  | H |
| ATOM | 6295 | O  | HOH A | 1 | 13.022 | 39.093 | 31.930 | O |
| ATOM | 6296 | H1 | HOH A | 2 | 13.018 | 40.019 | 32.252 | H |
| ATOM | 6297 | H2 | HOH A | 3 | 13.025 | 39.113 | 30.950 | H |
| ATOM | 6298 | O  | HOH A | 1 | 13.022 | 39.154 | 54.039 | O |
| ATOM | 6299 | H1 | HOH A | 2 | 13.016 | 40.081 | 54.356 | H |
| ATOM | 6300 | H2 | HOH A | 3 | 13.014 | 39.169 | 53.059 | H |
| ATOM | 6301 | O  | HOH A | 1 | 35.623 | 39.280 | 9.751  | O |
| ATOM | 6302 | H1 | HOH A | 2 | 35.621 | 40.206 | 10.072 | H |

|      |      |    |       |   |        |        |        |   |
|------|------|----|-------|---|--------|--------|--------|---|
| ATOM | 6303 | H2 | HOH A | 3 | 35.612 | 39.300 | 8.771  | H |
| ATOM | 6304 | O  | HOH A | 1 | 35.664 | 39.089 | 31.872 | O |
| ATOM | 6305 | H1 | HOH A | 2 | 35.660 | 40.017 | 32.189 | H |
| ATOM | 6306 | H2 | HOH A | 3 | 35.661 | 39.104 | 30.892 | H |
| ATOM | 6307 | O  | HOH A | 1 | 35.648 | 39.228 | 53.965 | O |
| ATOM | 6308 | H1 | HOH A | 2 | 35.645 | 40.160 | 54.270 | H |
| ATOM | 6309 | H2 | HOH A | 3 | 35.638 | 39.231 | 52.985 | H |
| ATOM | 6310 | O  | HOH A | 1 | 58.240 | 39.141 | 9.734  | O |
| ATOM | 6311 | H1 | HOH A | 2 | 58.230 | 40.069 | 10.049 | H |
| ATOM | 6312 | H2 | HOH A | 3 | 58.239 | 39.155 | 8.754  | H |
| ATOM | 6313 | O  | HOH A | 1 | 58.268 | 39.104 | 31.842 | O |
| ATOM | 6314 | H1 | HOH A | 2 | 58.261 | 40.030 | 32.163 | H |
| ATOM | 6315 | H2 | HOH A | 3 | 58.271 | 39.122 | 30.862 | H |
| ATOM | 6316 | O  | HOH A | 1 | 58.227 | 39.206 | 53.986 | O |
| ATOM | 6317 | H1 | HOH A | 2 | 58.223 | 40.135 | 54.296 | H |
| ATOM | 6318 | H2 | HOH A | 3 | 58.220 | 39.213 | 53.006 | H |
| ATOM | 6319 | O  | HOH A | 1 | 17.548 | 39.142 | 9.794  | O |
| ATOM | 6320 | H1 | HOH A | 2 | 18.344 | 38.676 | 10.125 | H |
| ATOM | 6321 | H2 | HOH A | 3 | 16.758 | 38.670 | 10.133 | H |
| ATOM | 6322 | O  | HOH A | 1 | 17.508 | 39.097 | 31.933 | O |
| ATOM | 6323 | H1 | HOH A | 2 | 18.300 | 38.622 | 32.261 | H |
| ATOM | 6324 | H2 | HOH A | 3 | 16.715 | 38.637 | 32.278 | H |
| ATOM | 6325 | O  | HOH A | 1 | 17.527 | 39.164 | 54.019 | O |
| ATOM | 6326 | H1 | HOH A | 2 | 18.321 | 38.693 | 54.346 | H |
| ATOM | 6327 | H2 | HOH A | 3 | 16.736 | 38.697 | 54.362 | H |
| ATOM | 6328 | O  | HOH A | 1 | 40.125 | 39.292 | 9.735  | O |
| ATOM | 6329 | H1 | HOH A | 2 | 40.916 | 38.818 | 10.066 | H |
| ATOM | 6330 | H2 | HOH A | 3 | 39.331 | 38.832 | 10.079 | H |
| ATOM | 6331 | O  | HOH A | 1 | 40.171 | 39.076 | 31.842 | O |
| ATOM | 6332 | H1 | HOH A | 2 | 40.962 | 38.598 | 32.166 | H |
| ATOM | 6333 | H2 | HOH A | 3 | 39.377 | 38.617 | 32.186 | H |
| ATOM | 6334 | O  | HOH A | 1 | 40.137 | 39.231 | 53.965 | O |
| ATOM | 6335 | H1 | HOH A | 2 | 40.932 | 38.768 | 54.301 | H |
| ATOM | 6336 | H2 | HOH A | 3 | 39.347 | 38.759 | 54.303 | H |
| ATOM | 6337 | O  | HOH A | 1 | 62.727 | 39.119 | 9.748  | O |
| ATOM | 6338 | H1 | HOH A | 2 | 63.518 | 38.648 | 10.083 | H |

|      |      |    |       |   |        |        |        |   |
|------|------|----|-------|---|--------|--------|--------|---|
| ATOM | 6339 | H2 | HOH A | 3 | 61.932 | 38.651 | 10.080 | H |
| ATOM | 6340 | O  | HOH A | 1 | 62.743 | 39.088 | 31.848 | O |
| ATOM | 6341 | H1 | HOH A | 2 | 63.534 | 38.615 | 32.181 | H |
| ATOM | 6342 | H2 | HOH A | 3 | 61.948 | 38.625 | 32.186 | H |
| ATOM | 6343 | O  | HOH A | 1 | 62.725 | 39.178 | 54.008 | O |
| ATOM | 6344 | H1 | HOH A | 2 | 63.513 | 38.703 | 54.344 | H |
| ATOM | 6345 | H2 | HOH A | 3 | 61.928 | 38.718 | 54.343 | H |
| ATOM | 6346 | O  | HOH A | 1 | 1.768  | 42.993 | 9.741  | O |
| ATOM | 6347 | H1 | HOH A | 2 | 0.960  | 42.541 | 10.061 | H |
| ATOM | 6348 | H2 | HOH A | 3 | 1.744  | 42.998 | 8.762  | H |
| ATOM | 6349 | O  | HOH A | 1 | 1.750  | 43.004 | 31.871 | O |
| ATOM | 6350 | H1 | HOH A | 2 | 0.943  | 42.546 | 32.188 | H |
| ATOM | 6351 | H2 | HOH A | 3 | 1.733  | 43.003 | 30.891 | H |
| ATOM | 6352 | O  | HOH A | 1 | 1.728  | 43.061 | 54.007 | O |
| ATOM | 6353 | H1 | HOH A | 2 | 0.921  | 42.606 | 54.327 | H |
| ATOM | 6354 | H2 | HOH A | 3 | 1.709  | 43.057 | 53.027 | H |
| ATOM | 6355 | O  | HOH A | 1 | 24.342 | 43.107 | 9.763  | O |
| ATOM | 6356 | H1 | HOH A | 2 | 23.539 | 42.640 | 10.075 | H |
| ATOM | 6357 | H2 | HOH A | 3 | 24.325 | 43.119 | 8.783  | H |
| ATOM | 6358 | O  | HOH A | 1 | 24.347 | 42.992 | 31.903 | O |
| ATOM | 6359 | H1 | HOH A | 2 | 23.543 | 42.530 | 32.220 | H |
| ATOM | 6360 | H2 | HOH A | 3 | 24.324 | 42.999 | 30.923 | H |
| ATOM | 6361 | O  | HOH A | 1 | 24.354 | 43.089 | 53.997 | O |
| ATOM | 6362 | H1 | HOH A | 2 | 23.551 | 42.628 | 54.318 | H |
| ATOM | 6363 | H2 | HOH A | 3 | 24.336 | 43.082 | 53.018 | H |
| ATOM | 6364 | O  | HOH A | 1 | 46.945 | 43.166 | 9.694  | O |
| ATOM | 6365 | H1 | HOH A | 2 | 46.141 | 42.707 | 10.015 | H |
| ATOM | 6366 | H2 | HOH A | 3 | 46.921 | 43.169 | 8.714  | H |
| ATOM | 6367 | O  | HOH A | 1 | 46.990 | 42.985 | 31.807 | O |
| ATOM | 6368 | H1 | HOH A | 2 | 46.182 | 42.525 | 32.115 | H |
| ATOM | 6369 | H2 | HOH A | 3 | 46.975 | 43.001 | 30.827 | H |
| ATOM | 6370 | O  | HOH A | 1 | 46.955 | 43.148 | 53.955 | O |
| ATOM | 6371 | H1 | HOH A | 2 | 46.146 | 42.702 | 54.283 | H |
| ATOM | 6372 | H2 | HOH A | 3 | 46.932 | 43.134 | 52.975 | H |
| ATOM | 6373 | O  | HOH A | 1 | 6.260  | 42.969 | 9.760  | O |
| ATOM | 6374 | H1 | HOH A | 2 | 5.465  | 42.508 | 10.099 | H |

|      |      |    |       |   |        |        |        |   |
|------|------|----|-------|---|--------|--------|--------|---|
| ATOM | 6375 | H2 | HOH A | 3 | 6.239  | 43.892 | 10.089 | H |
| ATOM | 6376 | O  | HOH A | 1 | 6.238  | 43.006 | 31.883 | O |
| ATOM | 6377 | H1 | HOH A | 2 | 5.443  | 42.539 | 32.218 | H |
| ATOM | 6378 | H2 | HOH A | 3 | 6.214  | 43.925 | 32.222 | H |
| ATOM | 6379 | O  | HOH A | 1 | 6.233  | 43.056 | 54.026 | O |
| ATOM | 6380 | H1 | HOH A | 2 | 5.437  | 42.596 | 54.366 | H |
| ATOM | 6381 | H2 | HOH A | 3 | 6.214  | 43.978 | 54.356 | H |
| ATOM | 6382 | O  | HOH A | 1 | 28.838 | 43.153 | 9.774  | O |
| ATOM | 6383 | H1 | HOH A | 2 | 28.050 | 42.685 | 10.121 | H |
| ATOM | 6384 | H2 | HOH A | 3 | 28.815 | 44.074 | 10.107 | H |
| ATOM | 6385 | O  | HOH A | 1 | 28.848 | 42.984 | 31.891 | O |
| ATOM | 6386 | H1 | HOH A | 2 | 28.055 | 42.517 | 32.227 | H |
| ATOM | 6387 | H2 | HOH A | 3 | 28.821 | 43.905 | 32.225 | H |
| ATOM | 6388 | O  | HOH A | 1 | 28.850 | 43.107 | 53.990 | O |
| ATOM | 6389 | H1 | HOH A | 2 | 28.057 | 42.647 | 54.336 | H |
| ATOM | 6390 | H2 | HOH A | 3 | 28.831 | 44.031 | 54.316 | H |
| ATOM | 6391 | O  | HOH A | 1 | 51.445 | 43.133 | 9.688  | O |
| ATOM | 6392 | H1 | HOH A | 2 | 50.651 | 42.673 | 10.029 | H |
| ATOM | 6393 | H2 | HOH A | 3 | 51.426 | 44.056 | 10.017 | H |
| ATOM | 6394 | O  | HOH A | 1 | 51.475 | 43.002 | 31.822 | O |
| ATOM | 6395 | H1 | HOH A | 2 | 50.679 | 42.544 | 32.165 | H |
| ATOM | 6396 | H2 | HOH A | 3 | 51.455 | 43.927 | 32.147 | H |
| ATOM | 6397 | O  | HOH A | 1 | 51.449 | 43.134 | 53.974 | O |
| ATOM | 6398 | H1 | HOH A | 2 | 50.648 | 42.677 | 54.304 | H |
| ATOM | 6399 | H2 | HOH A | 3 | 51.430 | 44.056 | 54.304 | H |
| ATOM | 6400 | O  | HOH A | 1 | 10.799 | 42.973 | 9.741  | O |
| ATOM | 6401 | H1 | HOH A | 2 | 9.988  | 42.529 | 10.066 | H |
| ATOM | 6402 | H2 | HOH A | 3 | 10.787 | 43.898 | 10.065 | H |
| ATOM | 6403 | O  | HOH A | 1 | 10.777 | 42.996 | 31.879 | O |
| ATOM | 6404 | H1 | HOH A | 2 | 9.969  | 42.543 | 32.200 | H |
| ATOM | 6405 | H2 | HOH A | 3 | 10.760 | 43.917 | 32.213 | H |
| ATOM | 6406 | O  | HOH A | 1 | 10.772 | 43.047 | 54.009 | O |
| ATOM | 6407 | H1 | HOH A | 2 | 9.966  | 42.599 | 54.340 | H |
| ATOM | 6408 | H2 | HOH A | 3 | 10.758 | 43.972 | 54.333 | H |
| ATOM | 6409 | O  | HOH A | 1 | 33.380 | 43.167 | 9.732  | O |
| ATOM | 6410 | H1 | HOH A | 2 | 32.570 | 42.723 | 10.061 | H |

|      |      |    |       |   |        |        |        |   |
|------|------|----|-------|---|--------|--------|--------|---|
| ATOM | 6411 | H2 | HOH A | 3 | 33.373 | 44.091 | 10.059 | H |
| ATOM | 6412 | O  | HOH A | 1 | 33.397 | 42.992 | 31.865 | O |
| ATOM | 6413 | H1 | HOH A | 2 | 32.585 | 42.550 | 32.191 | H |
| ATOM | 6414 | H2 | HOH A | 3 | 33.393 | 43.914 | 32.196 | H |
| ATOM | 6415 | O  | HOH A | 1 | 33.391 | 43.115 | 53.948 | O |
| ATOM | 6416 | H1 | HOH A | 2 | 32.586 | 42.669 | 54.283 | H |
| ATOM | 6417 | H2 | HOH A | 3 | 33.376 | 44.044 | 54.260 | H |
| ATOM | 6418 | O  | HOH A | 1 | 55.997 | 43.073 | 9.679  | O |
| ATOM | 6419 | H1 | HOH A | 2 | 55.186 | 42.629 | 10.005 | H |
| ATOM | 6420 | H2 | HOH A | 3 | 55.987 | 43.997 | 10.004 | H |
| ATOM | 6421 | O  | HOH A | 1 | 56.009 | 42.993 | 31.806 | O |
| ATOM | 6422 | H1 | HOH A | 2 | 55.199 | 42.547 | 32.133 | H |
| ATOM | 6423 | H2 | HOH A | 3 | 55.999 | 43.917 | 32.131 | H |
| ATOM | 6424 | O  | HOH A | 1 | 55.987 | 43.110 | 53.955 | O |
| ATOM | 6425 | H1 | HOH A | 2 | 55.176 | 42.670 | 54.284 | H |
| ATOM | 6426 | H2 | HOH A | 3 | 55.985 | 44.034 | 54.282 | H |
| ATOM | 6427 | O  | HOH A | 1 | 15.280 | 42.999 | 9.781  | O |
| ATOM | 6428 | H1 | HOH A | 2 | 16.095 | 42.563 | 10.105 | H |
| ATOM | 6429 | H2 | HOH A | 3 | 15.280 | 43.923 | 10.109 | H |
| ATOM | 6430 | O  | HOH A | 1 | 15.274 | 42.974 | 31.942 | O |
| ATOM | 6431 | H1 | HOH A | 2 | 16.088 | 42.533 | 32.265 | H |
| ATOM | 6432 | H2 | HOH A | 3 | 15.273 | 43.893 | 32.283 | H |
| ATOM | 6433 | O  | HOH A | 1 | 15.283 | 43.036 | 54.054 | O |
| ATOM | 6434 | H1 | HOH A | 2 | 16.095 | 42.595 | 54.383 | H |
| ATOM | 6435 | H2 | HOH A | 3 | 15.286 | 43.959 | 54.382 | H |
| ATOM | 6436 | O  | HOH A | 1 | 37.871 | 43.174 | 9.754  | O |
| ATOM | 6437 | H1 | HOH A | 2 | 38.686 | 42.732 | 10.071 | H |
| ATOM | 6438 | H2 | HOH A | 3 | 37.873 | 44.093 | 10.096 | H |
| ATOM | 6439 | O  | HOH A | 1 | 37.915 | 42.972 | 31.870 | O |
| ATOM | 6440 | H1 | HOH A | 2 | 38.724 | 42.529 | 32.199 | H |
| ATOM | 6441 | H2 | HOH A | 3 | 37.915 | 43.892 | 32.207 | H |
| ATOM | 6442 | O  | HOH A | 1 | 37.894 | 43.120 | 53.981 | O |
| ATOM | 6443 | H1 | HOH A | 2 | 38.704 | 42.679 | 54.312 | H |
| ATOM | 6444 | H2 | HOH A | 3 | 37.892 | 44.041 | 54.317 | H |
| ATOM | 6445 | O  | HOH A | 1 | 60.487 | 43.014 | 9.738  | O |
| ATOM | 6446 | H1 | HOH A | 2 | 61.296 | 42.581 | 10.081 | H |

|      |      |    |       |   |        |        |        |   |
|------|------|----|-------|---|--------|--------|--------|---|
| ATOM | 6447 | H2 | HOH A | 3 | 60.475 | 43.937 | 10.067 | H |
| ATOM | 6448 | O  | HOH A | 1 | 60.507 | 42.974 | 31.846 | O |
| ATOM | 6449 | H1 | HOH A | 2 | 61.317 | 42.528 | 32.170 | H |
| ATOM | 6450 | H2 | HOH A | 3 | 60.509 | 43.892 | 32.190 | H |
| ATOM | 6451 | O  | HOH A | 1 | 60.488 | 43.067 | 54.001 | O |
| ATOM | 6452 | H1 | HOH A | 2 | 61.297 | 42.627 | 54.336 | H |
| ATOM | 6453 | H2 | HOH A | 3 | 60.485 | 43.989 | 54.334 | H |
| ATOM | 6454 | O  | HOH A | 1 | 19.818 | 43.066 | 9.761  | O |
| ATOM | 6455 | H1 | HOH A | 2 | 19.829 | 43.992 | 10.080 | H |
| ATOM | 6456 | H2 | HOH A | 3 | 19.809 | 43.083 | 8.781  | H |
| ATOM | 6457 | O  | HOH A | 1 | 19.805 | 43.011 | 31.906 | O |
| ATOM | 6458 | H1 | HOH A | 2 | 19.812 | 43.938 | 32.223 | H |
| ATOM | 6459 | H2 | HOH A | 3 | 19.791 | 43.025 | 30.926 | H |
| ATOM | 6460 | O  | HOH A | 1 | 19.813 | 43.075 | 54.018 | O |
| ATOM | 6461 | H1 | HOH A | 2 | 19.815 | 44.005 | 54.324 | H |
| ATOM | 6462 | H2 | HOH A | 3 | 19.806 | 43.078 | 53.038 | H |
| ATOM | 6463 | O  | HOH A | 1 | 42.412 | 43.205 | 9.719  | O |
| ATOM | 6464 | H1 | HOH A | 2 | 42.417 | 44.131 | 10.041 | H |
| ATOM | 6465 | H2 | HOH A | 3 | 42.402 | 43.225 | 8.739  | H |
| ATOM | 6466 | O  | HOH A | 1 | 42.446 | 42.998 | 31.842 | O |
| ATOM | 6467 | H1 | HOH A | 2 | 42.450 | 43.926 | 32.159 | H |
| ATOM | 6468 | H2 | HOH A | 3 | 42.435 | 43.014 | 30.862 | H |
| ATOM | 6469 | O  | HOH A | 1 | 42.419 | 43.166 | 53.959 | O |
| ATOM | 6470 | H1 | HOH A | 2 | 42.428 | 44.097 | 54.263 | H |
| ATOM | 6471 | H2 | HOH A | 3 | 42.414 | 43.167 | 52.979 | H |
| ATOM | 6472 | O  | HOH A | 1 | 65.023 | 43.011 | 9.739  | O |
| ATOM | 6473 | H1 | HOH A | 2 | 65.027 | 43.938 | 10.057 | H |
| ATOM | 6474 | H2 | HOH A | 3 | 65.018 | 43.027 | 8.759  | H |
| ATOM | 6475 | O  | HOH A | 1 | 65.020 | 43.006 | 31.853 | O |
| ATOM | 6476 | H1 | HOH A | 2 | 65.022 | 43.933 | 32.170 | H |
| ATOM | 6477 | H2 | HOH A | 3 | 65.014 | 43.021 | 30.873 | H |
| ATOM | 6478 | O  | HOH A | 1 | 65.007 | 43.086 | 54.005 | O |
| ATOM | 6479 | H1 | HOH A | 2 | 65.018 | 44.013 | 54.322 | H |
| ATOM | 6480 | H2 | HOH A | 3 | 64.994 | 43.101 | 53.025 | H |
| ATOM | 6481 | O  | HOH A | 1 | 22.080 | 46.985 | 7.008  | O |
| ATOM | 6482 | H1 | HOH A | 2 | 22.888 | 46.547 | 6.668  | H |



|      |      |    |       |   |        |        |        |   |
|------|------|----|-------|---|--------|--------|--------|---|
| ATOM | 6483 | H2 | HOH A | 3 | 22.073 | 47.907 | 6.675  | H |
| ATOM | 6484 | O  | HOH A | 1 | 22.084 | 46.885 | 29.156 | O |
| ATOM | 6485 | H1 | HOH A | 2 | 22.895 | 46.448 | 28.824 | H |
| ATOM | 6486 | H2 | HOH A | 3 | 22.074 | 47.804 | 28.815 | H |
| ATOM | 6487 | O  | HOH A | 1 | 22.092 | 46.922 | 51.259 | O |
| ATOM | 6488 | H1 | HOH A | 2 | 22.899 | 46.480 | 50.921 | H |
| ATOM | 6489 | H2 | HOH A | 3 | 22.080 | 47.838 | 50.910 | H |
| ATOM | 6490 | O  | HOH A | 1 | 44.680 | 47.074 | 6.955  | O |
| ATOM | 6491 | H1 | HOH A | 2 | 45.489 | 46.636 | 6.616  | H |
| ATOM | 6492 | H2 | HOH A | 3 | 44.666 | 47.992 | 6.613  | H |
| ATOM | 6493 | O  | HOH A | 1 | 44.722 | 46.885 | 29.083 | O |
| ATOM | 6494 | H1 | HOH A | 2 | 45.529 | 46.450 | 28.739 | H |
| ATOM | 6495 | H2 | HOH A | 3 | 44.712 | 47.808 | 28.755 | H |
| ATOM | 6496 | O  | HOH A | 1 | 44.695 | 46.975 | 51.215 | O |
| ATOM | 6497 | H1 | HOH A | 2 | 45.509 | 46.534 | 50.891 | H |
| ATOM | 6498 | H2 | HOH A | 3 | 44.689 | 47.891 | 50.869 | H |
| ATOM | 6499 | O  | HOH A | 1 | 67.299 | 46.874 | 6.982  | O |
| ATOM | 6500 | H1 | HOH A | 2 | 68.111 | 46.436 | 6.652  | H |
| ATOM | 6501 | H2 | HOH A | 3 | 67.290 | 47.792 | 6.640  | H |
| ATOM | 6502 | O  | HOH A | 1 | 67.287 | 46.880 | 29.115 | O |
| ATOM | 6503 | H1 | HOH A | 2 | 68.096 | 46.441 | 28.776 | H |
| ATOM | 6504 | H2 | HOH A | 3 | 67.278 | 47.800 | 28.777 | H |
| ATOM | 6505 | O  | HOH A | 1 | 67.260 | 46.937 | 51.254 | O |
| ATOM | 6506 | H1 | HOH A | 2 | 68.069 | 46.493 | 50.925 | H |
| ATOM | 6507 | H2 | HOH A | 3 | 67.258 | 47.855 | 50.912 | H |
| ATOM | 6508 | O  | HOH A | 1 | 4.015  | 46.908 | 6.990  | O |
| ATOM | 6509 | H1 | HOH A | 2 | 4.820  | 46.447 | 6.674  | H |
| ATOM | 6510 | H2 | HOH A | 3 | 4.040  | 47.827 | 6.650  | H |
| ATOM | 6511 | O  | HOH A | 1 | 3.987  | 46.933 | 29.121 | O |
| ATOM | 6512 | H1 | HOH A | 2 | 4.794  | 46.476 | 28.805 | H |
| ATOM | 6513 | H2 | HOH A | 3 | 4.001  | 47.849 | 28.771 | H |
| ATOM | 6514 | O  | HOH A | 1 | 3.968  | 46.968 | 51.262 | O |
| ATOM | 6515 | H1 | HOH A | 2 | 4.777  | 46.512 | 50.950 | H |
| ATOM | 6516 | H2 | HOH A | 3 | 3.984  | 47.885 | 50.916 | H |
| ATOM | 6517 | O  | HOH A | 1 | 26.583 | 47.080 | 6.984  | O |
| ATOM | 6518 | H1 | HOH A | 2 | 27.393 | 46.627 | 6.668  | H |

|      |      |    |       |   |        |        |        |   |
|------|------|----|-------|---|--------|--------|--------|---|
| ATOM | 6519 | H2 | HOH A | 3 | 26.596 | 47.998 | 6.642  | H |
| ATOM | 6520 | O  | HOH A | 1 | 26.602 | 46.934 | 29.135 | O |
| ATOM | 6521 | H1 | HOH A | 2 | 27.404 | 46.467 | 28.821 | H |
| ATOM | 6522 | H2 | HOH A | 3 | 26.630 | 47.850 | 28.789 | H |
| ATOM | 6523 | O  | HOH A | 1 | 26.594 | 46.983 | 51.217 | O |
| ATOM | 6524 | H1 | HOH A | 2 | 27.401 | 46.531 | 50.894 | H |
| ATOM | 6525 | H2 | HOH A | 3 | 26.606 | 47.903 | 50.880 | H |
| ATOM | 6526 | O  | HOH A | 1 | 49.182 | 47.097 | 6.926  | O |
| ATOM | 6527 | H1 | HOH A | 2 | 49.982 | 46.637 | 6.598  | H |
| ATOM | 6528 | H2 | HOH A | 3 | 49.197 | 48.014 | 6.581  | H |
| ATOM | 6529 | O  | HOH A | 1 | 49.219 | 46.947 | 29.046 | O |
| ATOM | 6530 | H1 | HOH A | 2 | 50.026 | 46.490 | 28.730 | H |
| ATOM | 6531 | H2 | HOH A | 3 | 49.235 | 47.864 | 28.701 | H |
| ATOM | 6532 | O  | HOH A | 1 | 49.204 | 47.027 | 51.196 | O |
| ATOM | 6533 | H1 | HOH A | 2 | 50.006 | 46.564 | 50.874 | H |
| ATOM | 6534 | H2 | HOH A | 3 | 49.220 | 47.940 | 50.843 | H |
| ATOM | 6535 | O  | HOH A | 1 | 8.522  | 46.869 | 7.016  | O |
| ATOM | 6536 | H1 | HOH A | 2 | 9.321  | 46.415 | 6.674  | H |
| ATOM | 6537 | H2 | HOH A | 3 | 8.537  | 47.794 | 6.691  | H |
| ATOM | 6538 | O  | HOH A | 1 | 8.507  | 46.888 | 29.164 | O |
| ATOM | 6539 | H1 | HOH A | 2 | 9.307  | 46.433 | 28.828 | H |
| ATOM | 6540 | H2 | HOH A | 3 | 8.525  | 47.813 | 28.839 | H |
| ATOM | 6541 | O  | HOH A | 1 | 8.489  | 46.937 | 51.298 | O |
| ATOM | 6542 | H1 | HOH A | 2 | 9.284  | 46.477 | 50.956 | H |
| ATOM | 6543 | H2 | HOH A | 3 | 8.508  | 47.860 | 50.968 | H |
| ATOM | 6544 | O  | HOH A | 1 | 31.099 | 47.074 | 7.020  | O |
| ATOM | 6545 | H1 | HOH A | 2 | 31.899 | 46.623 | 6.676  | H |
| ATOM | 6546 | H2 | HOH A | 3 | 31.112 | 48.000 | 6.699  | H |
| ATOM | 6547 | O  | HOH A | 1 | 31.119 | 46.886 | 29.160 | O |
| ATOM | 6548 | H1 | HOH A | 2 | 31.916 | 46.435 | 28.811 | H |
| ATOM | 6549 | H2 | HOH A | 3 | 31.134 | 47.813 | 28.844 | H |
| ATOM | 6550 | O  | HOH A | 1 | 31.126 | 46.951 | 51.249 | O |
| ATOM | 6551 | H1 | HOH A | 2 | 31.927 | 46.504 | 50.904 | H |
| ATOM | 6552 | H2 | HOH A | 3 | 31.129 | 47.874 | 50.918 | H |
| ATOM | 6553 | O  | HOH A | 1 | 53.706 | 46.992 | 6.955  | O |
| ATOM | 6554 | H1 | HOH A | 2 | 54.504 | 46.540 | 6.609  | H |

|      |      |    |       |   |        |        |        |   |
|------|------|----|-------|---|--------|--------|--------|---|
| ATOM | 6555 | H2 | HOH A | 3 | 53.723 | 47.920 | 6.638  | H |
| ATOM | 6556 | O  | HOH A | 1 | 53.743 | 46.886 | 29.088 | O |
| ATOM | 6557 | H1 | HOH A | 2 | 54.541 | 46.432 | 28.745 | H |
| ATOM | 6558 | H2 | HOH A | 3 | 53.758 | 47.811 | 28.765 | H |
| ATOM | 6559 | O  | HOH A | 1 | 53.716 | 46.979 | 51.237 | O |
| ATOM | 6560 | H1 | HOH A | 2 | 54.516 | 46.527 | 50.896 | H |
| ATOM | 6561 | H2 | HOH A | 3 | 53.731 | 47.905 | 50.916 | H |
| ATOM | 6562 | O  | HOH A | 1 | 13.025 | 46.909 | 6.999  | O |
| ATOM | 6563 | H1 | HOH A | 2 | 13.825 | 46.446 | 6.674  | H |
| ATOM | 6564 | H2 | HOH A | 3 | 13.048 | 47.828 | 6.662  | H |
| ATOM | 6565 | O  | HOH A | 1 | 12.999 | 46.888 | 29.159 | O |
| ATOM | 6566 | H1 | HOH A | 2 | 13.792 | 46.420 | 28.823 | H |
| ATOM | 6567 | H2 | HOH A | 3 | 13.022 | 47.806 | 28.818 | H |
| ATOM | 6568 | O  | HOH A | 1 | 12.985 | 46.936 | 51.262 | O |
| ATOM | 6569 | H1 | HOH A | 2 | 13.785 | 46.472 | 50.938 | H |
| ATOM | 6570 | H2 | HOH A | 3 | 13.008 | 47.854 | 50.921 | H |
| ATOM | 6571 | O  | HOH A | 1 | 35.593 | 47.103 | 6.987  | O |
| ATOM | 6572 | H1 | HOH A | 2 | 36.392 | 46.645 | 6.651  | H |
| ATOM | 6573 | H2 | HOH A | 3 | 35.608 | 48.023 | 6.649  | H |
| ATOM | 6574 | O  | HOH A | 1 | 35.628 | 46.904 | 29.134 | O |
| ATOM | 6575 | H1 | HOH A | 2 | 36.424 | 46.443 | 28.794 | H |
| ATOM | 6576 | H2 | HOH A | 3 | 35.641 | 47.822 | 28.792 | H |
| ATOM | 6577 | O  | HOH A | 1 | 35.626 | 46.972 | 51.205 | O |
| ATOM | 6578 | H1 | HOH A | 2 | 36.431 | 46.515 | 50.883 | H |
| ATOM | 6579 | H2 | HOH A | 3 | 35.637 | 47.887 | 50.856 | H |
| ATOM | 6580 | O  | HOH A | 1 | 58.217 | 46.964 | 6.946  | O |
| ATOM | 6581 | H1 | HOH A | 2 | 59.013 | 46.490 | 6.628  | H |
| ATOM | 6582 | H2 | HOH A | 3 | 58.248 | 47.878 | 6.594  | H |
| ATOM | 6583 | O  | HOH A | 1 | 58.234 | 46.903 | 29.072 | O |
| ATOM | 6584 | H1 | HOH A | 2 | 59.032 | 46.440 | 28.743 | H |
| ATOM | 6585 | H2 | HOH A | 3 | 58.255 | 47.821 | 28.730 | H |
| ATOM | 6586 | O  | HOH A | 1 | 58.202 | 46.977 | 51.237 | O |
| ATOM | 6587 | H1 | HOH A | 2 | 58.996 | 46.507 | 50.906 | H |
| ATOM | 6588 | H2 | HOH A | 3 | 58.222 | 47.891 | 50.885 | H |
| ATOM | 6589 | O  | HOH A | 1 | 17.561 | 46.929 | 7.030  | O |
| ATOM | 6590 | H1 | HOH A | 2 | 18.358 | 46.476 | 6.684  | H |

|      |      |    |       |   |        |        |        |   |
|------|------|----|-------|---|--------|--------|--------|---|
| ATOM | 6591 | H2 | HOH A | 3 | 16.773 | 46.459 | 6.686  | H |
| ATOM | 6592 | O  | HOH A | 1 | 17.552 | 46.880 | 29.174 | O |
| ATOM | 6593 | H1 | HOH A | 2 | 18.351 | 46.428 | 28.832 | H |
| ATOM | 6594 | H2 | HOH A | 3 | 16.766 | 46.410 | 28.827 | H |
| ATOM | 6595 | O  | HOH A | 1 | 17.543 | 46.914 | 51.278 | O |
| ATOM | 6596 | H1 | HOH A | 2 | 18.340 | 46.461 | 50.932 | H |
| ATOM | 6597 | H2 | HOH A | 3 | 16.754 | 46.443 | 50.938 | H |
| ATOM | 6598 | O  | HOH A | 1 | 40.153 | 47.093 | 6.993  | O |
| ATOM | 6599 | H1 | HOH A | 2 | 40.948 | 46.637 | 6.646  | H |
| ATOM | 6600 | H2 | HOH A | 3 | 39.362 | 46.627 | 6.649  | H |
| ATOM | 6601 | O  | HOH A | 1 | 40.181 | 46.890 | 29.121 | O |
| ATOM | 6602 | H1 | HOH A | 2 | 40.979 | 46.437 | 28.777 | H |
| ATOM | 6603 | H2 | HOH A | 3 | 39.394 | 46.421 | 28.775 | H |
| ATOM | 6604 | O  | HOH A | 1 | 40.178 | 46.978 | 51.217 | O |
| ATOM | 6605 | H1 | HOH A | 2 | 40.977 | 46.523 | 50.875 | H |
| ATOM | 6606 | H2 | HOH A | 3 | 39.391 | 46.505 | 50.874 | H |
| ATOM | 6607 | O  | HOH A | 1 | 62.773 | 46.900 | 6.978  | O |
| ATOM | 6608 | H1 | HOH A | 2 | 63.569 | 46.441 | 6.636  | H |
| ATOM | 6609 | H2 | HOH A | 3 | 61.983 | 46.430 | 6.638  | H |
| ATOM | 6610 | O  | HOH A | 1 | 62.771 | 46.874 | 29.107 | O |
| ATOM | 6611 | H1 | HOH A | 2 | 63.570 | 46.422 | 28.764 | H |
| ATOM | 6612 | H2 | HOH A | 3 | 61.984 | 46.405 | 28.757 | H |
| ATOM | 6613 | O  | HOH A | 1 | 62.740 | 46.940 | 51.261 | O |
| ATOM | 6614 | H1 | HOH A | 2 | 63.534 | 46.484 | 50.912 | H |
| ATOM | 6615 | H2 | HOH A | 3 | 61.948 | 46.476 | 50.917 | H |
| ATOM | 6616 | O  | HOH A | 1 | 1.708  | 27.319 | 6.978  | O |
| ATOM | 6617 | H1 | HOH A | 2 | 2.517  | 26.871 | 6.652  | H |
| ATOM | 6618 | H2 | HOH A | 3 | 1.734  | 27.314 | 7.957  | H |
| ATOM | 6619 | O  | HOH A | 1 | 1.669  | 27.335 | 29.123 | O |
| ATOM | 6620 | H1 | HOH A | 2 | 2.476  | 26.888 | 28.791 | H |
| ATOM | 6621 | H2 | HOH A | 3 | 1.697  | 27.321 | 30.103 | H |
| ATOM | 6622 | O  | HOH A | 1 | 1.672  | 27.389 | 51.259 | O |
| ATOM | 6623 | H1 | HOH A | 2 | 2.475  | 26.933 | 50.930 | H |
| ATOM | 6624 | H2 | HOH A | 3 | 1.698  | 27.378 | 52.239 | H |
| ATOM | 6625 | O  | HOH A | 1 | 24.289 | 27.470 | 7.014  | O |
| ATOM | 6626 | H1 | HOH A | 2 | 25.093 | 27.025 | 6.675  | H |

|      |      |    |       |   |        |        |        |   |
|------|------|----|-------|---|--------|--------|--------|---|
| ATOM | 6627 | H2 | HOH A | 3 | 24.322 | 27.452 | 7.993  | H |
| ATOM | 6628 | O  | HOH A | 1 | 24.289 | 27.342 | 29.156 | O |
| ATOM | 6629 | H1 | HOH A | 2 | 25.096 | 26.890 | 28.832 | H |
| ATOM | 6630 | H2 | HOH A | 3 | 24.312 | 27.337 | 30.136 | H |
| ATOM | 6631 | O  | HOH A | 1 | 24.281 | 27.402 | 51.242 | O |
| ATOM | 6632 | H1 | HOH A | 2 | 25.083 | 26.942 | 50.918 | H |
| ATOM | 6633 | H2 | HOH A | 3 | 24.310 | 27.407 | 52.222 | H |
| ATOM | 6634 | O  | HOH A | 1 | 46.875 | 27.524 | 6.944  | O |
| ATOM | 6635 | H1 | HOH A | 2 | 47.682 | 27.076 | 6.612  | H |
| ATOM | 6636 | H2 | HOH A | 3 | 46.901 | 27.507 | 7.924  | H |
| ATOM | 6637 | O  | HOH A | 1 | 46.919 | 27.362 | 29.075 | O |
| ATOM | 6638 | H1 | HOH A | 2 | 47.722 | 26.907 | 28.746 | H |
| ATOM | 6639 | H2 | HOH A | 3 | 46.943 | 27.350 | 30.054 | H |
| ATOM | 6640 | O  | HOH A | 1 | 46.898 | 27.444 | 51.209 | O |
| ATOM | 6641 | H1 | HOH A | 2 | 47.701 | 26.987 | 50.883 | H |
| ATOM | 6642 | H2 | HOH A | 3 | 46.930 | 27.451 | 52.188 | H |
| ATOM | 6643 | O  | HOH A | 1 | 6.248  | 27.321 | 7.010  | O |
| ATOM | 6644 | H1 | HOH A | 2 | 7.046  | 26.862 | 6.673  | H |
| ATOM | 6645 | H2 | HOH A | 3 | 6.266  | 28.243 | 6.678  | H |
| ATOM | 6646 | O  | HOH A | 1 | 6.198  | 27.332 | 29.149 | O |
| ATOM | 6647 | H1 | HOH A | 2 | 7.000  | 26.881 | 28.812 | H |
| ATOM | 6648 | H2 | HOH A | 3 | 6.209  | 28.255 | 28.820 | H |
| ATOM | 6649 | O  | HOH A | 1 | 6.191  | 27.383 | 51.272 | O |
| ATOM | 6650 | H1 | HOH A | 2 | 6.995  | 26.934 | 50.937 | H |
| ATOM | 6651 | H2 | HOH A | 3 | 6.203  | 28.308 | 50.947 | H |
| ATOM | 6652 | O  | HOH A | 1 | 28.806 | 27.515 | 7.014  | O |
| ATOM | 6653 | H1 | HOH A | 2 | 29.605 | 27.062 | 6.672  | H |
| ATOM | 6654 | H2 | HOH A | 3 | 28.819 | 28.439 | 6.686  | H |
| ATOM | 6655 | O  | HOH A | 1 | 28.823 | 27.341 | 29.175 | O |
| ATOM | 6656 | H1 | HOH A | 2 | 29.623 | 26.890 | 28.836 | H |
| ATOM | 6657 | H2 | HOH A | 3 | 28.834 | 28.265 | 28.848 | H |
| ATOM | 6658 | O  | HOH A | 1 | 28.813 | 27.396 | 51.254 | O |
| ATOM | 6659 | H1 | HOH A | 2 | 29.614 | 26.943 | 50.916 | H |
| ATOM | 6660 | H2 | HOH A | 3 | 28.823 | 28.318 | 50.922 | H |
| ATOM | 6661 | O  | HOH A | 1 | 51.424 | 27.485 | 6.956  | O |
| ATOM | 6662 | H1 | HOH A | 2 | 52.221 | 27.029 | 6.615  | H |

|      |      |    |       |   |        |        |        |   |
|------|------|----|-------|---|--------|--------|--------|---|
| ATOM | 6663 | H2 | HOH A | 3 | 51.439 | 28.408 | 6.627  | H |
| ATOM | 6664 | O  | HOH A | 1 | 51.457 | 27.346 | 29.080 | O |
| ATOM | 6665 | H1 | HOH A | 2 | 52.257 | 26.894 | 28.739 | H |
| ATOM | 6666 | H2 | HOH A | 3 | 51.466 | 28.268 | 28.748 | H |
| ATOM | 6667 | O  | HOH A | 1 | 51.425 | 27.439 | 51.226 | O |
| ATOM | 6668 | H1 | HOH A | 2 | 52.226 | 26.987 | 50.890 | H |
| ATOM | 6669 | H2 | HOH A | 3 | 51.437 | 28.362 | 50.897 | H |
| ATOM | 6670 | O  | HOH A | 1 | 10.787 | 27.300 | 7.009  | O |
| ATOM | 6671 | H1 | HOH A | 2 | 10.767 | 28.221 | 6.674  | H |
| ATOM | 6672 | H2 | HOH A | 3 | 10.801 | 27.334 | 7.988  | H |
| ATOM | 6673 | O  | HOH A | 1 | 10.749 | 27.300 | 29.160 | O |
| ATOM | 6674 | H1 | HOH A | 2 | 10.737 | 28.223 | 28.828 | H |
| ATOM | 6675 | H2 | HOH A | 3 | 10.757 | 27.331 | 30.139 | H |
| ATOM | 6676 | O  | HOH A | 1 | 10.747 | 27.348 | 51.296 | O |
| ATOM | 6677 | H1 | HOH A | 2 | 10.740 | 28.269 | 50.961 | H |
| ATOM | 6678 | H2 | HOH A | 3 | 10.763 | 27.382 | 52.275 | H |
| ATOM | 6679 | O  | HOH A | 1 | 33.346 | 27.500 | 7.005  | O |
| ATOM | 6680 | H1 | HOH A | 2 | 33.335 | 28.425 | 6.681  | H |
| ATOM | 6681 | H2 | HOH A | 3 | 33.354 | 27.523 | 7.985  | H |
| ATOM | 6682 | O  | HOH A | 1 | 33.370 | 27.316 | 29.152 | O |
| ATOM | 6683 | H1 | HOH A | 2 | 33.361 | 28.241 | 28.828 | H |
| ATOM | 6684 | H2 | HOH A | 3 | 33.382 | 27.338 | 30.131 | H |
| ATOM | 6685 | O  | HOH A | 1 | 33.378 | 27.367 | 51.226 | O |
| ATOM | 6686 | H1 | HOH A | 2 | 33.370 | 28.288 | 50.892 | H |
| ATOM | 6687 | H2 | HOH A | 3 | 33.393 | 27.399 | 52.205 | H |
| ATOM | 6688 | O  | HOH A | 1 | 55.968 | 27.393 | 6.944  | O |
| ATOM | 6689 | H1 | HOH A | 2 | 55.958 | 28.317 | 6.618  | H |
| ATOM | 6690 | H2 | HOH A | 3 | 55.973 | 27.417 | 7.924  | H |
| ATOM | 6691 | O  | HOH A | 1 | 55.984 | 27.308 | 29.077 | O |
| ATOM | 6692 | H1 | HOH A | 2 | 55.979 | 28.229 | 28.742 | H |
| ATOM | 6693 | H2 | HOH A | 3 | 55.989 | 27.343 | 30.057 | H |
| ATOM | 6694 | O  | HOH A | 1 | 55.962 | 27.395 | 51.232 | O |
| ATOM | 6695 | H1 | HOH A | 2 | 55.957 | 28.315 | 50.893 | H |
| ATOM | 6696 | H2 | HOH A | 3 | 55.972 | 27.433 | 52.211 | H |
| ATOM | 6697 | O  | HOH A | 1 | 15.316 | 27.346 | 7.025  | O |
| ATOM | 6698 | H1 | HOH A | 2 | 16.118 | 26.884 | 6.702  | H |

|      |      |    |       |   |        |        |        |   |
|------|------|----|-------|---|--------|--------|--------|---|
| ATOM | 6699 | H2 | HOH A | 3 | 15.325 | 28.257 | 6.664  | H |
| ATOM | 6700 | O  | HOH A | 1 | 15.294 | 27.327 | 29.194 | O |
| ATOM | 6701 | H1 | HOH A | 2 | 16.094 | 26.867 | 28.865 | H |
| ATOM | 6702 | H2 | HOH A | 3 | 15.302 | 28.240 | 28.839 | H |
| ATOM | 6703 | O  | HOH A | 1 | 15.285 | 27.359 | 51.286 | O |
| ATOM | 6704 | H1 | HOH A | 2 | 16.083 | 26.893 | 50.960 | H |
| ATOM | 6705 | H2 | HOH A | 3 | 15.298 | 28.270 | 50.925 | H |
| ATOM | 6706 | O  | HOH A | 1 | 37.875 | 27.531 | 7.014  | O |
| ATOM | 6707 | H1 | HOH A | 2 | 38.672 | 27.065 | 6.686  | H |
| ATOM | 6708 | H2 | HOH A | 3 | 37.886 | 28.441 | 6.651  | H |
| ATOM | 6709 | O  | HOH A | 1 | 37.922 | 27.326 | 29.132 | O |
| ATOM | 6710 | H1 | HOH A | 2 | 38.719 | 26.861 | 28.799 | H |
| ATOM | 6711 | H2 | HOH A | 3 | 37.933 | 28.238 | 28.775 | H |
| ATOM | 6712 | O  | HOH A | 1 | 37.919 | 27.404 | 51.212 | O |
| ATOM | 6713 | H1 | HOH A | 2 | 38.722 | 26.945 | 50.889 | H |
| ATOM | 6714 | H2 | HOH A | 3 | 37.921 | 28.313 | 50.846 | H |
| ATOM | 6715 | O  | HOH A | 1 | 60.503 | 27.376 | 6.974  | O |
| ATOM | 6716 | H1 | HOH A | 2 | 61.303 | 26.911 | 6.651  | H |
| ATOM | 6717 | H2 | HOH A | 3 | 60.518 | 28.289 | 6.619  | H |
| ATOM | 6718 | O  | HOH A | 1 | 60.504 | 27.328 | 29.109 | O |
| ATOM | 6719 | H1 | HOH A | 2 | 61.303 | 26.861 | 28.785 | H |
| ATOM | 6720 | H2 | HOH A | 3 | 60.520 | 28.240 | 28.749 | H |
| ATOM | 6721 | O  | HOH A | 1 | 60.495 | 27.398 | 51.249 | O |
| ATOM | 6722 | H1 | HOH A | 2 | 61.294 | 26.936 | 50.920 | H |
| ATOM | 6723 | H2 | HOH A | 3 | 60.504 | 28.311 | 50.893 | H |
| ATOM | 6724 | O  | HOH A | 1 | 19.795 | 27.426 | 6.997  | O |
| ATOM | 6725 | H1 | HOH A | 2 | 20.606 | 26.972 | 6.685  | H |
| ATOM | 6726 | H2 | HOH A | 3 | 19.797 | 27.409 | 7.977  | H |
| ATOM | 6727 | O  | HOH A | 1 | 19.782 | 27.353 | 29.154 | O |
| ATOM | 6728 | H1 | HOH A | 2 | 20.587 | 26.887 | 28.846 | H |
| ATOM | 6729 | H2 | HOH A | 3 | 19.784 | 27.346 | 30.134 | H |
| ATOM | 6730 | O  | HOH A | 1 | 19.781 | 27.394 | 51.241 | O |
| ATOM | 6731 | H1 | HOH A | 2 | 20.583 | 26.920 | 50.936 | H |
| ATOM | 6732 | H2 | HOH A | 3 | 19.785 | 27.396 | 52.221 | H |
| ATOM | 6733 | O  | HOH A | 1 | 42.391 | 27.546 | 6.943  | O |
| ATOM | 6734 | H1 | HOH A | 2 | 43.192 | 27.077 | 6.628  | H |

|      |      |    |       |   |        |        |        |   |
|------|------|----|-------|---|--------|--------|--------|---|
| ATOM | 6735 | H2 | HOH A | 3 | 42.402 | 27.538 | 7.923  | H |
| ATOM | 6736 | O  | HOH A | 1 | 42.424 | 27.355 | 29.076 | O |
| ATOM | 6737 | H1 | HOH A | 2 | 43.228 | 26.891 | 28.764 | H |
| ATOM | 6738 | H2 | HOH A | 3 | 42.430 | 27.346 | 30.056 | H |
| ATOM | 6739 | O  | HOH A | 1 | 42.407 | 27.441 | 51.192 | O |
| ATOM | 6740 | H1 | HOH A | 2 | 43.210 | 26.971 | 50.883 | H |
| ATOM | 6741 | H2 | HOH A | 3 | 42.413 | 27.440 | 52.172 | H |
| ATOM | 6742 | O  | HOH A | 1 | 65.000 | 27.355 | 6.964  | O |
| ATOM | 6743 | H1 | HOH A | 2 | 65.803 | 26.890 | 6.648  | H |
| ATOM | 6744 | H2 | HOH A | 3 | 65.010 | 27.343 | 7.944  | H |
| ATOM | 6745 | O  | HOH A | 1 | 64.987 | 27.341 | 29.090 | O |
| ATOM | 6746 | H1 | HOH A | 2 | 65.790 | 26.877 | 28.772 | H |
| ATOM | 6747 | H2 | HOH A | 3 | 65.000 | 27.331 | 30.070 | H |
| ATOM | 6748 | O  | HOH A | 1 | 64.978 | 27.408 | 51.243 | O |
| ATOM | 6749 | H1 | HOH A | 2 | 65.780 | 26.938 | 50.934 | H |
| ATOM | 6750 | H2 | HOH A | 3 | 64.987 | 27.410 | 52.223 | H |
| ATOM | 6751 | O  | HOH A | 1 | 22.073 | 31.372 | 7.018  | O |
| ATOM | 6752 | H1 | HOH A | 2 | 22.882 | 30.911 | 6.713  | H |
| ATOM | 6753 | H2 | HOH A | 3 | 22.072 | 31.365 | 7.998  | H |
| ATOM | 6754 | O  | HOH A | 1 | 22.081 | 31.275 | 29.170 | O |
| ATOM | 6755 | H1 | HOH A | 2 | 22.887 | 30.805 | 28.870 | H |
| ATOM | 6756 | H2 | HOH A | 3 | 22.078 | 31.274 | 30.150 | H |
| ATOM | 6757 | O  | HOH A | 1 | 22.077 | 31.329 | 51.251 | O |
| ATOM | 6758 | H1 | HOH A | 2 | 22.885 | 30.862 | 50.952 | H |
| ATOM | 6759 | H2 | HOH A | 3 | 22.072 | 31.331 | 52.231 | H |
| ATOM | 6760 | O  | HOH A | 1 | 44.663 | 31.482 | 6.950  | O |
| ATOM | 6761 | H1 | HOH A | 2 | 45.465 | 31.005 | 6.654  | H |
| ATOM | 6762 | H2 | HOH A | 3 | 44.656 | 31.483 | 7.930  | H |
| ATOM | 6763 | O  | HOH A | 1 | 44.711 | 31.289 | 29.069 | O |
| ATOM | 6764 | H1 | HOH A | 2 | 45.517 | 30.816 | 28.772 | H |
| ATOM | 6765 | H2 | HOH A | 3 | 44.706 | 31.293 | 30.049 | H |
| ATOM | 6766 | O  | HOH A | 1 | 44.695 | 31.391 | 51.196 | O |
| ATOM | 6767 | H1 | HOH A | 2 | 45.503 | 30.919 | 50.904 | H |
| ATOM | 6768 | H2 | HOH A | 3 | 44.686 | 31.398 | 52.176 | H |
| ATOM | 6769 | O  | HOH A | 1 | 67.294 | 31.257 | 6.975  | O |
| ATOM | 6770 | H1 | HOH A | 2 | 68.099 | 30.788 | 6.671  | H |



|      |      |    |       |   |        |        |        |   |
|------|------|----|-------|---|--------|--------|--------|---|
| ATOM | 6771 | H2 | HOH A | 3 | 67.290 | 31.250 | 7.955  | H |
| ATOM | 6772 | O  | HOH A | 1 | 67.274 | 31.277 | 29.106 | O |
| ATOM | 6773 | H1 | HOH A | 2 | 68.076 | 30.799 | 28.808 | H |
| ATOM | 6774 | H2 | HOH A | 3 | 67.268 | 31.276 | 30.086 | H |
| ATOM | 6775 | O  | HOH A | 1 | 67.262 | 31.331 | 51.257 | O |
| ATOM | 6776 | H1 | HOH A | 2 | 68.064 | 30.857 | 50.953 | H |
| ATOM | 6777 | H2 | HOH A | 3 | 67.266 | 31.336 | 52.237 | H |
| ATOM | 6778 | O  | HOH A | 1 | 4.049  | 31.222 | 6.999  | O |
| ATOM | 6779 | H1 | HOH A | 2 | 4.048  | 32.151 | 6.687  | H |
| ATOM | 6780 | H2 | HOH A | 3 | 4.041  | 31.233 | 7.979  | H |
| ATOM | 6781 | O  | HOH A | 1 | 4.002  | 31.229 | 29.135 | O |
| ATOM | 6782 | H1 | HOH A | 2 | 4.007  | 32.154 | 28.812 | H |
| ATOM | 6783 | H2 | HOH A | 3 | 4.003  | 31.251 | 30.115 | H |
| ATOM | 6784 | O  | HOH A | 1 | 3.994  | 31.306 | 51.265 | O |
| ATOM | 6785 | H1 | HOH A | 2 | 3.987  | 32.232 | 50.943 | H |
| ATOM | 6786 | H2 | HOH A | 3 | 3.995  | 31.327 | 52.245 | H |
| ATOM | 6787 | O  | HOH A | 1 | 26.622 | 31.401 | 7.006  | O |
| ATOM | 6788 | H1 | HOH A | 2 | 26.614 | 32.330 | 6.694  | H |
| ATOM | 6789 | H2 | HOH A | 3 | 26.614 | 31.411 | 7.986  | H |
| ATOM | 6790 | O  | HOH A | 1 | 26.634 | 31.239 | 29.161 | O |
| ATOM | 6791 | H1 | HOH A | 2 | 26.634 | 32.166 | 28.840 | H |
| ATOM | 6792 | H2 | HOH A | 3 | 26.626 | 31.258 | 30.140 | H |
| ATOM | 6793 | O  | HOH A | 1 | 26.625 | 31.310 | 51.251 | O |
| ATOM | 6794 | H1 | HOH A | 2 | 26.615 | 32.235 | 50.926 | H |
| ATOM | 6795 | H2 | HOH A | 3 | 26.628 | 31.334 | 52.231 | H |
| ATOM | 6796 | O  | HOH A | 1 | 49.210 | 31.409 | 6.944  | O |
| ATOM | 6797 | H1 | HOH A | 2 | 49.212 | 32.336 | 6.625  | H |
| ATOM | 6798 | H2 | HOH A | 3 | 49.212 | 31.426 | 7.924  | H |
| ATOM | 6799 | O  | HOH A | 1 | 49.264 | 31.249 | 29.060 | O |
| ATOM | 6800 | H1 | HOH A | 2 | 49.262 | 32.180 | 28.754 | H |
| ATOM | 6801 | H2 | HOH A | 3 | 49.255 | 31.252 | 30.040 | H |
| ATOM | 6802 | O  | HOH A | 1 | 49.232 | 31.355 | 51.217 | O |
| ATOM | 6803 | H1 | HOH A | 2 | 49.229 | 32.279 | 50.889 | H |
| ATOM | 6804 | H2 | HOH A | 3 | 49.222 | 31.380 | 52.196 | H |
| ATOM | 6805 | O  | HOH A | 1 | 8.572  | 31.231 | 6.990  | O |
| ATOM | 6806 | H1 | HOH A | 2 | 7.761  | 30.780 | 6.676  | H |

|      |      |    |       |   |        |        |        |   |
|------|------|----|-------|---|--------|--------|--------|---|
| ATOM | 6807 | H2 | HOH A | 3 | 8.564  | 31.222 | 7.970  | H |
| ATOM | 6808 | O  | HOH A | 1 | 8.532  | 31.249 | 29.139 | O |
| ATOM | 6809 | H1 | HOH A | 2 | 7.719  | 30.797 | 28.828 | H |
| ATOM | 6810 | H2 | HOH A | 3 | 8.523  | 31.249 | 30.119 | H |
| ATOM | 6811 | O  | HOH A | 1 | 8.534  | 31.292 | 51.266 | O |
| ATOM | 6812 | H1 | HOH A | 2 | 7.722  | 30.838 | 50.955 | H |
| ATOM | 6813 | H2 | HOH A | 3 | 8.526  | 31.290 | 52.246 | H |
| ATOM | 6814 | O  | HOH A | 1 | 31.152 | 31.434 | 6.997  | O |
| ATOM | 6815 | H1 | HOH A | 2 | 30.343 | 30.977 | 6.686  | H |
| ATOM | 6816 | H2 | HOH A | 3 | 31.143 | 31.433 | 7.977  | H |
| ATOM | 6817 | O  | HOH A | 1 | 31.170 | 31.248 | 29.137 | O |
| ATOM | 6818 | H1 | HOH A | 2 | 30.356 | 30.799 | 28.827 | H |
| ATOM | 6819 | H2 | HOH A | 3 | 31.161 | 31.248 | 30.117 | H |
| ATOM | 6820 | O  | HOH A | 1 | 31.165 | 31.310 | 51.226 | O |
| ATOM | 6821 | H1 | HOH A | 2 | 30.350 | 30.857 | 50.922 | H |
| ATOM | 6822 | H2 | HOH A | 3 | 31.157 | 31.323 | 52.205 | H |
| ATOM | 6823 | O  | HOH A | 1 | 53.754 | 31.363 | 6.922  | O |
| ATOM | 6824 | H1 | HOH A | 2 | 52.938 | 30.919 | 6.610  | H |
| ATOM | 6825 | H2 | HOH A | 3 | 53.745 | 31.361 | 7.902  | H |
| ATOM | 6826 | O  | HOH A | 1 | 53.792 | 31.247 | 29.056 | O |
| ATOM | 6827 | H1 | HOH A | 2 | 52.978 | 30.802 | 28.741 | H |
| ATOM | 6828 | H2 | HOH A | 3 | 53.776 | 31.249 | 30.036 | H |
| ATOM | 6829 | O  | HOH A | 1 | 53.766 | 31.342 | 51.201 | O |
| ATOM | 6830 | H1 | HOH A | 2 | 52.956 | 30.887 | 50.891 | H |
| ATOM | 6831 | H2 | HOH A | 3 | 53.755 | 31.349 | 52.181 | H |
| ATOM | 6832 | O  | HOH A | 1 | 13.050 | 31.227 | 6.990  | O |
| ATOM | 6833 | H1 | HOH A | 2 | 12.248 | 30.763 | 6.673  | H |
| ATOM | 6834 | H2 | HOH A | 3 | 13.035 | 31.222 | 7.970  | H |
| ATOM | 6835 | O  | HOH A | 1 | 13.020 | 31.226 | 29.147 | O |
| ATOM | 6836 | H1 | HOH A | 2 | 12.217 | 30.767 | 28.824 | H |
| ATOM | 6837 | H2 | HOH A | 3 | 13.000 | 31.220 | 30.126 | H |
| ATOM | 6838 | O  | HOH A | 1 | 13.019 | 31.270 | 51.253 | O |
| ATOM | 6839 | H1 | HOH A | 2 | 12.215 | 30.808 | 50.935 | H |
| ATOM | 6840 | H2 | HOH A | 3 | 13.006 | 31.262 | 52.233 | H |
| ATOM | 6841 | O  | HOH A | 1 | 35.631 | 31.436 | 6.976  | O |
| ATOM | 6842 | H1 | HOH A | 2 | 34.826 | 30.975 | 6.662  | H |

|      |      |    |       |   |        |        |        |   |
|------|------|----|-------|---|--------|--------|--------|---|
| ATOM | 6843 | H2 | HOH A | 3 | 35.622 | 31.428 | 7.956  | H |
| ATOM | 6844 | O  | HOH A | 1 | 35.669 | 31.230 | 29.098 | O |
| ATOM | 6845 | H1 | HOH A | 2 | 34.862 | 30.772 | 28.782 | H |
| ATOM | 6846 | H2 | HOH A | 3 | 35.660 | 31.216 | 30.078 | H |
| ATOM | 6847 | O  | HOH A | 1 | 35.655 | 31.305 | 51.178 | O |
| ATOM | 6848 | H1 | HOH A | 2 | 34.853 | 30.836 | 50.867 | H |
| ATOM | 6849 | H2 | HOH A | 3 | 35.640 | 31.314 | 52.158 | H |
| ATOM | 6850 | O  | HOH A | 1 | 58.241 | 31.298 | 6.933  | O |
| ATOM | 6851 | H1 | HOH A | 2 | 57.436 | 30.839 | 6.615  | H |
| ATOM | 6852 | H2 | HOH A | 3 | 58.224 | 31.296 | 7.913  | H |
| ATOM | 6853 | O  | HOH A | 1 | 58.250 | 31.228 | 29.068 | O |
| ATOM | 6854 | H1 | HOH A | 2 | 57.447 | 30.768 | 28.745 | H |
| ATOM | 6855 | H2 | HOH A | 3 | 58.231 | 31.221 | 30.047 | H |
| ATOM | 6856 | O  | HOH A | 1 | 58.238 | 31.320 | 51.207 | O |
| ATOM | 6857 | H1 | HOH A | 2 | 57.434 | 30.859 | 50.890 | H |
| ATOM | 6858 | H2 | HOH A | 3 | 58.219 | 31.323 | 52.187 | H |
| ATOM | 6859 | O  | HOH A | 1 | 17.564 | 31.286 | 6.981  | O |
| ATOM | 6860 | H1 | HOH A | 2 | 18.378 | 30.838 | 6.669  | H |
| ATOM | 6861 | H2 | HOH A | 3 | 17.570 | 31.278 | 7.961  | H |
| ATOM | 6862 | O  | HOH A | 1 | 17.544 | 31.229 | 29.141 | O |
| ATOM | 6863 | H1 | HOH A | 2 | 18.358 | 30.777 | 28.834 | H |
| ATOM | 6864 | H2 | HOH A | 3 | 17.546 | 31.221 | 30.121 | H |
| ATOM | 6865 | O  | HOH A | 1 | 17.552 | 31.277 | 51.243 | O |
| ATOM | 6866 | H1 | HOH A | 2 | 18.361 | 30.818 | 50.934 | H |
| ATOM | 6867 | H2 | HOH A | 3 | 17.561 | 31.278 | 52.223 | H |
| ATOM | 6868 | O  | HOH A | 1 | 40.150 | 31.445 | 6.935  | O |
| ATOM | 6869 | H1 | HOH A | 2 | 40.955 | 30.977 | 6.629  | H |
| ATOM | 6870 | H2 | HOH A | 3 | 40.158 | 31.450 | 7.915  | H |
| ATOM | 6871 | O  | HOH A | 1 | 40.197 | 31.231 | 29.063 | O |
| ATOM | 6872 | H1 | HOH A | 2 | 41.004 | 30.770 | 28.753 | H |
| ATOM | 6873 | H2 | HOH A | 3 | 40.203 | 31.227 | 30.043 | H |
| ATOM | 6874 | O  | HOH A | 1 | 40.174 | 31.333 | 51.166 | O |
| ATOM | 6875 | H1 | HOH A | 2 | 40.990 | 30.881 | 50.864 | H |
| ATOM | 6876 | H2 | HOH A | 3 | 40.178 | 31.343 | 52.145 | H |
| ATOM | 6877 | O  | HOH A | 1 | 62.775 | 31.260 | 6.945  | O |
| ATOM | 6878 | H1 | HOH A | 2 | 63.580 | 30.793 | 6.638  | H |

|      |      |    |       |   |        |        |        |   |
|------|------|----|-------|---|--------|--------|--------|---|
| ATOM | 6879 | H2 | HOH A | 3 | 62.780 | 31.261 | 7.925  | H |
| ATOM | 6880 | O  | HOH A | 1 | 62.770 | 31.225 | 29.065 | O |
| ATOM | 6881 | H1 | HOH A | 2 | 63.576 | 30.760 | 28.759 | H |
| ATOM | 6882 | H2 | HOH A | 3 | 62.779 | 31.232 | 30.045 | H |
| ATOM | 6883 | O  | HOH A | 1 | 62.746 | 31.308 | 51.225 | O |
| ATOM | 6884 | H1 | HOH A | 2 | 63.556 | 30.849 | 50.920 | H |
| ATOM | 6885 | H2 | HOH A | 3 | 62.754 | 31.319 | 52.205 | H |
| ATOM | 6886 | O  | HOH A | 1 | 1.775  | 35.145 | 6.997  | O |
| ATOM | 6887 | H1 | HOH A | 2 | 2.562  | 34.667 | 6.661  | H |
| ATOM | 6888 | H2 | HOH A | 3 | 0.977  | 34.681 | 6.669  | H |
| ATOM | 6889 | O  | HOH A | 1 | 1.756  | 35.168 | 29.131 | O |
| ATOM | 6890 | H1 | HOH A | 2 | 2.545  | 34.695 | 28.794 | H |
| ATOM | 6891 | H2 | HOH A | 3 | 0.960  | 34.705 | 28.794 | H |
| ATOM | 6892 | O  | HOH A | 1 | 1.726  | 35.226 | 51.257 | O |
| ATOM | 6893 | H1 | HOH A | 2 | 2.519  | 34.753 | 50.929 | H |
| ATOM | 6894 | H2 | HOH A | 3 | 0.934  | 34.750 | 50.932 | H |
| ATOM | 6895 | O  | HOH A | 1 | 24.344 | 35.300 | 7.026  | O |
| ATOM | 6896 | H1 | HOH A | 2 | 25.139 | 34.834 | 6.690  | H |
| ATOM | 6897 | H2 | HOH A | 3 | 23.553 | 34.827 | 6.692  | H |
| ATOM | 6898 | O  | HOH A | 1 | 24.345 | 35.175 | 29.165 | O |
| ATOM | 6899 | H1 | HOH A | 2 | 25.136 | 34.701 | 28.832 | H |
| ATOM | 6900 | H2 | HOH A | 3 | 23.550 | 34.710 | 28.830 | H |
| ATOM | 6901 | O  | HOH A | 1 | 24.341 | 35.234 | 51.246 | O |
| ATOM | 6902 | H1 | HOH A | 2 | 25.131 | 34.765 | 50.904 | H |
| ATOM | 6903 | H2 | HOH A | 3 | 23.546 | 34.758 | 50.929 | H |
| ATOM | 6904 | O  | HOH A | 1 | 46.959 | 35.351 | 6.953  | O |
| ATOM | 6905 | H1 | HOH A | 2 | 47.749 | 34.880 | 6.616  | H |
| ATOM | 6906 | H2 | HOH A | 3 | 46.163 | 34.886 | 6.619  | H |
| ATOM | 6907 | O  | HOH A | 1 | 47.002 | 35.184 | 29.064 | O |
| ATOM | 6908 | H1 | HOH A | 2 | 47.794 | 34.712 | 28.730 | H |
| ATOM | 6909 | H2 | HOH A | 3 | 46.208 | 34.715 | 28.733 | H |
| ATOM | 6910 | O  | HOH A | 1 | 46.955 | 35.284 | 51.210 | O |
| ATOM | 6911 | H1 | HOH A | 2 | 47.746 | 34.813 | 50.873 | H |
| ATOM | 6912 | H2 | HOH A | 3 | 46.161 | 34.814 | 50.881 | H |
| ATOM | 6913 | O  | HOH A | 1 | 6.283  | 35.136 | 6.999  | O |
| ATOM | 6914 | H1 | HOH A | 2 | 7.088  | 34.672 | 6.686  | H |

|      |      |    |       |   |        |        |        |   |
|------|------|----|-------|---|--------|--------|--------|---|
| ATOM | 6915 | H2 | HOH A | 3 | 6.291  | 35.127 | 7.979  | H |
| ATOM | 6916 | O  | HOH A | 1 | 6.248  | 35.151 | 29.142 | O |
| ATOM | 6917 | H1 | HOH A | 2 | 7.049  | 34.682 | 28.829 | H |
| ATOM | 6918 | H2 | HOH A | 3 | 6.260  | 35.152 | 30.122 | H |
| ATOM | 6919 | O  | HOH A | 1 | 6.242  | 35.215 | 51.261 | O |
| ATOM | 6920 | H1 | HOH A | 2 | 7.039  | 34.739 | 50.949 | H |
| ATOM | 6921 | H2 | HOH A | 3 | 6.252  | 35.212 | 52.241 | H |
| ATOM | 6922 | O  | HOH A | 1 | 28.851 | 35.342 | 7.005  | O |
| ATOM | 6923 | H1 | HOH A | 2 | 29.656 | 34.879 | 6.691  | H |
| ATOM | 6924 | H2 | HOH A | 3 | 28.857 | 35.329 | 7.984  | H |
| ATOM | 6925 | O  | HOH A | 1 | 28.876 | 35.159 | 29.151 | O |
| ATOM | 6926 | H1 | HOH A | 2 | 29.677 | 34.690 | 28.836 | H |
| ATOM | 6927 | H2 | HOH A | 3 | 28.891 | 35.159 | 30.130 | H |
| ATOM | 6928 | O  | HOH A | 1 | 28.865 | 35.218 | 51.225 | O |
| ATOM | 6929 | H1 | HOH A | 2 | 29.663 | 34.741 | 50.916 | H |
| ATOM | 6930 | H2 | HOH A | 3 | 28.878 | 35.227 | 52.205 | H |
| ATOM | 6931 | O  | HOH A | 1 | 51.461 | 35.298 | 6.939  | O |
| ATOM | 6932 | H1 | HOH A | 2 | 52.259 | 34.822 | 6.628  | H |
| ATOM | 6933 | H2 | HOH A | 3 | 51.464 | 35.286 | 7.919  | H |
| ATOM | 6934 | O  | HOH A | 1 | 51.504 | 35.169 | 29.057 | O |
| ATOM | 6935 | H1 | HOH A | 2 | 52.303 | 34.691 | 28.751 | H |
| ATOM | 6936 | H2 | HOH A | 3 | 51.501 | 35.156 | 30.037 | H |
| ATOM | 6937 | O  | HOH A | 1 | 51.476 | 35.257 | 51.203 | O |
| ATOM | 6938 | H1 | HOH A | 2 | 52.273 | 34.777 | 50.898 | H |
| ATOM | 6939 | H2 | HOH A | 3 | 51.483 | 35.266 | 52.183 | H |
| ATOM | 6940 | O  | HOH A | 1 | 10.814 | 35.164 | 7.016  | O |
| ATOM | 6941 | H1 | HOH A | 2 | 10.019 | 34.709 | 6.667  | H |
| ATOM | 6942 | H2 | HOH A | 3 | 10.806 | 36.086 | 6.683  | H |
| ATOM | 6943 | O  | HOH A | 1 | 10.764 | 35.177 | 29.144 | O |
| ATOM | 6944 | H1 | HOH A | 2 | 9.966  | 34.725 | 28.796 | H |
| ATOM | 6945 | H2 | HOH A | 3 | 10.760 | 36.098 | 28.810 | H |
| ATOM | 6946 | O  | HOH A | 1 | 10.761 | 35.214 | 51.257 | O |
| ATOM | 6947 | H1 | HOH A | 2 | 9.963  | 34.754 | 50.922 | H |
| ATOM | 6948 | H2 | HOH A | 3 | 10.744 | 36.135 | 50.922 | H |
| ATOM | 6949 | O  | HOH A | 1 | 33.370 | 35.371 | 6.985  | O |
| ATOM | 6950 | H1 | HOH A | 2 | 32.570 | 34.917 | 6.648  | H |

|      |      |    |       |   |        |        |        |   |
|------|------|----|-------|---|--------|--------|--------|---|
| ATOM | 6951 | H2 | HOH A | 3 | 33.355 | 36.294 | 6.655  | H |
| ATOM | 6952 | O  | HOH A | 1 | 33.411 | 35.178 | 29.110 | O |
| ATOM | 6953 | H1 | HOH A | 2 | 32.611 | 34.722 | 28.776 | H |
| ATOM | 6954 | H2 | HOH A | 3 | 33.399 | 36.098 | 28.772 | H |
| ATOM | 6955 | O  | HOH A | 1 | 33.392 | 35.248 | 51.210 | O |
| ATOM | 6956 | H1 | HOH A | 2 | 32.600 | 34.782 | 50.869 | H |
| ATOM | 6957 | H2 | HOH A | 3 | 33.371 | 36.168 | 50.873 | H |
| ATOM | 6958 | O  | HOH A | 1 | 55.990 | 35.264 | 6.926  | O |
| ATOM | 6959 | H1 | HOH A | 2 | 55.191 | 34.814 | 6.580  | H |
| ATOM | 6960 | H2 | HOH A | 3 | 55.983 | 36.188 | 6.599  | H |
| ATOM | 6961 | O  | HOH A | 1 | 56.018 | 35.177 | 29.059 | O |
| ATOM | 6962 | H1 | HOH A | 2 | 55.224 | 34.719 | 28.711 | H |
| ATOM | 6963 | H2 | HOH A | 3 | 56.007 | 36.098 | 28.724 | H |
| ATOM | 6964 | O  | HOH A | 1 | 55.973 | 35.261 | 51.223 | O |
| ATOM | 6965 | H1 | HOH A | 2 | 55.178 | 34.802 | 50.880 | H |
| ATOM | 6966 | H2 | HOH A | 3 | 55.958 | 36.182 | 50.888 | H |
| ATOM | 6967 | O  | HOH A | 1 | 15.317 | 35.155 | 7.027  | O |
| ATOM | 6968 | H1 | HOH A | 2 | 14.515 | 34.708 | 6.686  | H |
| ATOM | 6969 | H2 | HOH A | 3 | 15.314 | 36.077 | 6.695  | H |
| ATOM | 6970 | O  | HOH A | 1 | 15.274 | 35.123 | 29.179 | O |
| ATOM | 6971 | H1 | HOH A | 2 | 14.471 | 34.679 | 28.836 | H |
| ATOM | 6972 | H2 | HOH A | 3 | 15.273 | 36.047 | 28.851 | H |
| ATOM | 6973 | O  | HOH A | 1 | 15.284 | 35.163 | 51.265 | O |
| ATOM | 6974 | H1 | HOH A | 2 | 14.480 | 34.717 | 50.926 | H |
| ATOM | 6975 | H2 | HOH A | 3 | 15.278 | 36.087 | 50.939 | H |
| ATOM | 6976 | O  | HOH A | 1 | 37.904 | 35.333 | 6.985  | O |
| ATOM | 6977 | H1 | HOH A | 2 | 37.103 | 34.887 | 6.639  | H |
| ATOM | 6978 | H2 | HOH A | 3 | 37.898 | 36.258 | 6.662  | H |
| ATOM | 6979 | O  | HOH A | 1 | 37.943 | 35.131 | 29.092 | O |
| ATOM | 6980 | H1 | HOH A | 2 | 37.140 | 34.684 | 28.751 | H |
| ATOM | 6981 | H2 | HOH A | 3 | 37.937 | 36.055 | 28.766 | H |
| ATOM | 6982 | O  | HOH A | 1 | 37.916 | 35.199 | 51.221 | O |
| ATOM | 6983 | H1 | HOH A | 2 | 37.117 | 34.749 | 50.876 | H |
| ATOM | 6984 | H2 | HOH A | 3 | 37.909 | 36.123 | 50.892 | H |
| ATOM | 6985 | O  | HOH A | 1 | 60.513 | 35.165 | 6.956  | O |
| ATOM | 6986 | H1 | HOH A | 2 | 59.709 | 34.725 | 6.608  | H |

|      |      |    |       |   |        |        |        |   |
|------|------|----|-------|---|--------|--------|--------|---|
| ATOM | 6987 | H2 | HOH A | 3 | 60.517 | 36.089 | 6.631  | H |
| ATOM | 6988 | O  | HOH A | 1 | 60.530 | 35.113 | 29.080 | O |
| ATOM | 6989 | H1 | HOH A | 2 | 59.731 | 34.666 | 28.732 | H |
| ATOM | 6990 | H2 | HOH A | 3 | 60.529 | 36.036 | 28.751 | H |
| ATOM | 6991 | O  | HOH A | 1 | 60.498 | 35.200 | 51.244 | O |
| ATOM | 6992 | H1 | HOH A | 2 | 59.698 | 34.749 | 50.902 | H |
| ATOM | 6993 | H2 | HOH A | 3 | 60.491 | 36.122 | 50.911 | H |
| ATOM | 6994 | O  | HOH A | 1 | 19.844 | 35.243 | 6.996  | O |
| ATOM | 6995 | H1 | HOH A | 2 | 19.043 | 34.781 | 6.673  | H |
| ATOM | 6996 | H2 | HOH A | 3 | 19.814 | 36.167 | 6.671  | H |
| ATOM | 6997 | O  | HOH A | 1 | 19.813 | 35.171 | 29.139 | O |
| ATOM | 6998 | H1 | HOH A | 2 | 19.006 | 34.712 | 28.828 | H |
| ATOM | 6999 | H2 | HOH A | 3 | 19.785 | 36.092 | 28.806 | H |
| ATOM | 7000 | O  | HOH A | 1 | 19.836 | 35.206 | 51.232 | O |
| ATOM | 7001 | H1 | HOH A | 2 | 19.031 | 34.742 | 50.919 | H |
| ATOM | 7002 | H2 | HOH A | 3 | 19.802 | 36.128 | 50.902 | H |
| ATOM | 7003 | O  | HOH A | 1 | 42.433 | 35.375 | 6.940  | O |
| ATOM | 7004 | H1 | HOH A | 2 | 41.631 | 34.911 | 6.621  | H |
| ATOM | 7005 | H2 | HOH A | 3 | 42.403 | 36.296 | 6.607  | H |
| ATOM | 7006 | O  | HOH A | 1 | 42.492 | 35.177 | 29.055 | O |
| ATOM | 7007 | H1 | HOH A | 2 | 41.691 | 34.714 | 28.733 | H |
| ATOM | 7008 | H2 | HOH A | 3 | 42.460 | 36.101 | 28.729 | H |
| ATOM | 7009 | O  | HOH A | 1 | 42.454 | 35.264 | 51.184 | O |
| ATOM | 7010 | H1 | HOH A | 2 | 41.654 | 34.799 | 50.864 | H |
| ATOM | 7011 | H2 | HOH A | 3 | 42.423 | 36.186 | 50.851 | H |
| ATOM | 7012 | O  | HOH A | 1 | 65.065 | 35.181 | 6.955  | O |
| ATOM | 7013 | H1 | HOH A | 2 | 64.261 | 34.720 | 6.637  | H |
| ATOM | 7014 | H2 | HOH A | 3 | 65.039 | 36.102 | 6.620  | H |
| ATOM | 7015 | O  | HOH A | 1 | 65.046 | 35.168 | 29.071 | O |
| ATOM | 7016 | H1 | HOH A | 2 | 64.247 | 34.705 | 28.746 | H |
| ATOM | 7017 | H2 | HOH A | 3 | 65.016 | 36.091 | 28.742 | H |
| ATOM | 7018 | O  | HOH A | 1 | 65.029 | 35.222 | 51.229 | O |
| ATOM | 7019 | H1 | HOH A | 2 | 64.221 | 34.762 | 50.919 | H |
| ATOM | 7020 | H2 | HOH A | 3 | 65.001 | 36.143 | 50.893 | H |
| ATOM | 7021 | O  | HOH A | 1 | 22.063 | 39.173 | 6.978  | O |
| ATOM | 7022 | H1 | HOH A | 2 | 22.867 | 38.704 | 6.673  | H |

|      |      |    |       |   |        |        |        |   |
|------|------|----|-------|---|--------|--------|--------|---|
| ATOM | 7023 | H2 | HOH A | 3 | 22.067 | 39.175 | 7.958  | H |
| ATOM | 7024 | O  | HOH A | 1 | 22.057 | 39.073 | 29.131 | O |
| ATOM | 7025 | H1 | HOH A | 2 | 22.856 | 38.597 | 28.824 | H |
| ATOM | 7026 | H2 | HOH A | 3 | 22.063 | 39.075 | 30.111 | H |
| ATOM | 7027 | O  | HOH A | 1 | 22.065 | 39.138 | 51.229 | O |
| ATOM | 7028 | H1 | HOH A | 2 | 22.859 | 38.654 | 50.920 | H |
| ATOM | 7029 | H2 | HOH A | 3 | 22.073 | 39.139 | 52.209 | H |
| ATOM | 7030 | O  | HOH A | 1 | 44.654 | 39.282 | 6.917  | O |
| ATOM | 7031 | H1 | HOH A | 2 | 45.448 | 38.797 | 6.608  | H |
| ATOM | 7032 | H2 | HOH A | 3 | 44.659 | 39.278 | 7.897  | H |
| ATOM | 7033 | O  | HOH A | 1 | 44.707 | 39.100 | 29.039 | O |
| ATOM | 7034 | H1 | HOH A | 2 | 45.506 | 38.620 | 28.734 | H |
| ATOM | 7035 | H2 | HOH A | 3 | 44.709 | 39.100 | 30.019 | H |
| ATOM | 7036 | O  | HOH A | 1 | 44.658 | 39.192 | 51.164 | O |
| ATOM | 7037 | H1 | HOH A | 2 | 45.459 | 38.716 | 50.860 | H |
| ATOM | 7038 | H2 | HOH A | 3 | 44.671 | 39.211 | 52.144 | H |
| ATOM | 7039 | O  | HOH A | 1 | 67.281 | 39.079 | 6.959  | O |
| ATOM | 7040 | H1 | HOH A | 2 | 68.079 | 38.600 | 6.654  | H |
| ATOM | 7041 | H2 | HOH A | 3 | 67.282 | 39.076 | 7.939  | H |
| ATOM | 7042 | O  | HOH A | 1 | 67.269 | 39.088 | 29.070 | O |
| ATOM | 7043 | H1 | HOH A | 2 | 68.062 | 38.599 | 28.766 | H |
| ATOM | 7044 | H2 | HOH A | 3 | 67.271 | 39.090 | 30.050 | H |
| ATOM | 7045 | O  | HOH A | 1 | 67.246 | 39.139 | 51.219 | O |
| ATOM | 7046 | H1 | HOH A | 2 | 68.042 | 38.659 | 50.911 | H |
| ATOM | 7047 | H2 | HOH A | 3 | 67.254 | 39.141 | 52.199 | H |
| ATOM | 7048 | O  | HOH A | 1 | 4.000  | 39.027 | 6.994  | O |
| ATOM | 7049 | H1 | HOH A | 2 | 4.798  | 38.567 | 6.662  | H |
| ATOM | 7050 | H2 | HOH A | 3 | 3.213  | 38.550 | 6.658  | H |
| ATOM | 7051 | O  | HOH A | 1 | 3.974  | 39.062 | 29.110 | O |
| ATOM | 7052 | H1 | HOH A | 2 | 4.774  | 38.598 | 28.783 | H |
| ATOM | 7053 | H2 | HOH A | 3 | 3.188  | 38.584 | 28.771 | H |
| ATOM | 7054 | O  | HOH A | 1 | 3.960  | 39.098 | 51.261 | O |
| ATOM | 7055 | H1 | HOH A | 2 | 4.757  | 38.633 | 50.930 | H |
| ATOM | 7056 | H2 | HOH A | 3 | 3.171  | 38.626 | 50.921 | H |
| ATOM | 7057 | O  | HOH A | 1 | 26.569 | 39.211 | 7.001  | O |
| ATOM | 7058 | H1 | HOH A | 2 | 27.372 | 38.757 | 6.670  | H |



|      |      |    |       |   |        |        |        |   |
|------|------|----|-------|---|--------|--------|--------|---|
| ATOM | 7059 | H2 | HOH A | 3 | 25.786 | 38.730 | 6.660  | H |
| ATOM | 7060 | O  | HOH A | 1 | 26.583 | 39.051 | 29.151 | O |
| ATOM | 7061 | H1 | HOH A | 2 | 27.379 | 38.591 | 28.811 | H |
| ATOM | 7062 | H2 | HOH A | 3 | 25.793 | 38.582 | 28.809 | H |
| ATOM | 7063 | O  | HOH A | 1 | 26.577 | 39.118 | 51.228 | O |
| ATOM | 7064 | H1 | HOH A | 2 | 27.375 | 38.654 | 50.898 | H |
| ATOM | 7065 | H2 | HOH A | 3 | 25.789 | 38.643 | 50.892 | H |
| ATOM | 7066 | O  | HOH A | 1 | 49.179 | 39.226 | 6.938  | O |
| ATOM | 7067 | H1 | HOH A | 2 | 49.975 | 38.759 | 6.609  | H |
| ATOM | 7068 | H2 | HOH A | 3 | 48.390 | 38.756 | 6.597  | H |
| ATOM | 7069 | O  | HOH A | 1 | 49.236 | 39.063 | 29.053 | O |
| ATOM | 7070 | H1 | HOH A | 2 | 50.032 | 38.601 | 28.717 | H |
| ATOM | 7071 | H2 | HOH A | 3 | 48.446 | 38.592 | 28.714 | H |
| ATOM | 7072 | O  | HOH A | 1 | 49.182 | 39.157 | 51.184 | O |
| ATOM | 7073 | H1 | HOH A | 2 | 49.976 | 38.683 | 50.858 | H |
| ATOM | 7074 | H2 | HOH A | 3 | 48.390 | 38.689 | 50.847 | H |
| ATOM | 7075 | O  | HOH A | 1 | 8.546  | 39.057 | 6.982  | O |
| ATOM | 7076 | H1 | HOH A | 2 | 7.741  | 38.594 | 6.671  | H |
| ATOM | 7077 | H2 | HOH A | 3 | 8.541  | 39.050 | 7.962  | H |
| ATOM | 7078 | O  | HOH A | 1 | 8.517  | 39.081 | 29.130 | O |
| ATOM | 7079 | H1 | HOH A | 2 | 7.718  | 38.615 | 28.804 | H |
| ATOM | 7080 | H2 | HOH A | 3 | 8.496  | 39.069 | 30.110 | H |
| ATOM | 7081 | O  | HOH A | 1 | 8.501  | 39.132 | 51.240 | O |
| ATOM | 7082 | H1 | HOH A | 2 | 7.697  | 38.666 | 50.927 | H |
| ATOM | 7083 | H2 | HOH A | 3 | 8.492  | 39.127 | 52.220 | H |
| ATOM | 7084 | O  | HOH A | 1 | 31.116 | 39.283 | 6.978  | O |
| ATOM | 7085 | H1 | HOH A | 2 | 30.315 | 38.817 | 6.658  | H |
| ATOM | 7086 | H2 | HOH A | 3 | 31.100 | 39.276 | 7.958  | H |
| ATOM | 7087 | O  | HOH A | 1 | 31.131 | 39.084 | 29.099 | O |
| ATOM | 7088 | H1 | HOH A | 2 | 30.325 | 38.622 | 28.787 | H |
| ATOM | 7089 | H2 | HOH A | 3 | 31.122 | 39.079 | 30.078 | H |
| ATOM | 7090 | O  | HOH A | 1 | 31.128 | 39.160 | 51.205 | O |
| ATOM | 7091 | H1 | HOH A | 2 | 30.322 | 38.696 | 50.897 | H |
| ATOM | 7092 | H2 | HOH A | 3 | 31.123 | 39.156 | 52.185 | H |
| ATOM | 7093 | O  | HOH A | 1 | 53.740 | 39.215 | 6.910  | O |
| ATOM | 7094 | H1 | HOH A | 2 | 52.933 | 38.759 | 6.594  | H |

|      |      |    |       |   |        |        |        |   |
|------|------|----|-------|---|--------|--------|--------|---|
| ATOM | 7095 | H2 | HOH A | 3 | 53.729 | 39.206 | 7.890  | H |
| ATOM | 7096 | O  | HOH A | 1 | 53.777 | 39.099 | 29.039 | O |
| ATOM | 7097 | H1 | HOH A | 2 | 52.979 | 38.631 | 28.716 | H |
| ATOM | 7098 | H2 | HOH A | 3 | 53.761 | 39.084 | 30.019 | H |
| ATOM | 7099 | O  | HOH A | 1 | 53.710 | 39.177 | 51.177 | O |
| ATOM | 7100 | H1 | HOH A | 2 | 52.910 | 38.705 | 50.865 | H |
| ATOM | 7101 | H2 | HOH A | 3 | 53.700 | 39.174 | 52.157 | H |
| ATOM | 7102 | O  | HOH A | 1 | 13.050 | 39.061 | 7.028  | O |
| ATOM | 7103 | H1 | HOH A | 2 | 13.863 | 38.618 | 6.707  | H |
| ATOM | 7104 | H2 | HOH A | 3 | 13.057 | 39.984 | 6.699  | H |
| ATOM | 7105 | O  | HOH A | 1 | 13.021 | 39.069 | 29.174 | O |
| ATOM | 7106 | H1 | HOH A | 2 | 13.832 | 38.621 | 28.853 | H |
| ATOM | 7107 | H2 | HOH A | 3 | 13.039 | 39.994 | 28.852 | H |
| ATOM | 7108 | O  | HOH A | 1 | 13.015 | 39.096 | 51.279 | O |
| ATOM | 7109 | H1 | HOH A | 2 | 13.822 | 38.647 | 50.951 | H |
| ATOM | 7110 | H2 | HOH A | 3 | 13.030 | 40.021 | 50.953 | H |
| ATOM | 7111 | O  | HOH A | 1 | 35.622 | 39.263 | 6.989  | O |
| ATOM | 7112 | H1 | HOH A | 2 | 36.431 | 38.818 | 6.659  | H |
| ATOM | 7113 | H2 | HOH A | 3 | 35.628 | 40.186 | 6.659  | H |
| ATOM | 7114 | O  | HOH A | 1 | 35.668 | 39.057 | 29.114 | O |
| ATOM | 7115 | H1 | HOH A | 2 | 36.474 | 38.613 | 28.779 | H |
| ATOM | 7116 | H2 | HOH A | 3 | 35.672 | 39.981 | 28.787 | H |
| ATOM | 7117 | O  | HOH A | 1 | 35.641 | 39.146 | 51.206 | O |
| ATOM | 7118 | H1 | HOH A | 2 | 36.449 | 38.695 | 50.883 | H |
| ATOM | 7119 | H2 | HOH A | 3 | 35.655 | 40.068 | 50.874 | H |
| ATOM | 7120 | O  | HOH A | 1 | 58.241 | 39.112 | 6.974  | O |
| ATOM | 7121 | H1 | HOH A | 2 | 59.053 | 38.667 | 6.652  | H |
| ATOM | 7122 | H2 | HOH A | 3 | 58.255 | 40.038 | 6.654  | H |
| ATOM | 7123 | O  | HOH A | 1 | 58.279 | 39.070 | 29.081 | O |
| ATOM | 7124 | H1 | HOH A | 2 | 59.090 | 38.625 | 28.759 | H |
| ATOM | 7125 | H2 | HOH A | 3 | 58.289 | 39.993 | 28.753 | H |
| ATOM | 7126 | O  | HOH A | 1 | 58.214 | 39.138 | 51.227 | O |
| ATOM | 7127 | H1 | HOH A | 2 | 59.027 | 38.695 | 50.905 | H |
| ATOM | 7128 | H2 | HOH A | 3 | 58.222 | 40.061 | 50.898 | H |
| ATOM | 7129 | O  | HOH A | 1 | 17.545 | 39.130 | 7.027  | O |
| ATOM | 7130 | H1 | HOH A | 2 | 18.359 | 38.684 | 6.711  | H |

|      |      |    |       |   |        |        |        |   |
|------|------|----|-------|---|--------|--------|--------|---|
| ATOM | 7131 | H2 | HOH A | 3 | 17.561 | 39.129 | 8.007  | H |
| ATOM | 7132 | O  | HOH A | 1 | 17.516 | 39.083 | 29.170 | O |
| ATOM | 7133 | H1 | HOH A | 2 | 18.327 | 38.629 | 28.858 | H |
| ATOM | 7134 | H2 | HOH A | 3 | 17.522 | 39.076 | 30.150 | H |
| ATOM | 7135 | O  | HOH A | 1 | 17.511 | 39.117 | 51.263 | O |
| ATOM | 7136 | H1 | HOH A | 2 | 18.327 | 38.673 | 50.951 | H |
| ATOM | 7137 | H2 | HOH A | 3 | 17.525 | 39.122 | 52.243 | H |
| ATOM | 7138 | O  | HOH A | 1 | 40.122 | 39.292 | 6.975  | O |
| ATOM | 7139 | H1 | HOH A | 2 | 40.929 | 38.836 | 6.658  | H |
| ATOM | 7140 | H2 | HOH A | 3 | 40.138 | 39.290 | 7.955  | H |
| ATOM | 7141 | O  | HOH A | 1 | 40.175 | 39.081 | 29.080 | O |
| ATOM | 7142 | H1 | HOH A | 2 | 40.983 | 38.626 | 28.764 | H |
| ATOM | 7143 | H2 | HOH A | 3 | 40.183 | 39.069 | 30.060 | H |
| ATOM | 7144 | O  | HOH A | 1 | 40.146 | 39.153 | 51.206 | O |
| ATOM | 7145 | H1 | HOH A | 2 | 40.956 | 38.699 | 50.894 | H |
| ATOM | 7146 | H2 | HOH A | 3 | 40.160 | 39.159 | 52.186 | H |
| ATOM | 7147 | O  | HOH A | 1 | 62.756 | 39.092 | 6.984  | O |
| ATOM | 7148 | H1 | HOH A | 2 | 63.565 | 38.637 | 6.670  | H |
| ATOM | 7149 | H2 | HOH A | 3 | 62.767 | 39.089 | 7.964  | H |
| ATOM | 7150 | O  | HOH A | 1 | 62.757 | 39.067 | 29.086 | O |
| ATOM | 7151 | H1 | HOH A | 2 | 63.568 | 38.614 | 28.775 | H |
| ATOM | 7152 | H2 | HOH A | 3 | 62.764 | 39.062 | 30.066 | H |
| ATOM | 7153 | O  | HOH A | 1 | 62.721 | 39.137 | 51.248 | O |
| ATOM | 7154 | H1 | HOH A | 2 | 63.529 | 38.681 | 50.934 | H |
| ATOM | 7155 | H2 | HOH A | 3 | 62.739 | 39.144 | 52.228 | H |
| ATOM | 7156 | O  | HOH A | 1 | 1.749  | 42.997 | 6.992  | O |
| ATOM | 7157 | H1 | HOH A | 2 | 2.534  | 42.504 | 6.673  | H |
| ATOM | 7158 | H2 | HOH A | 3 | 0.949  | 42.532 | 6.671  | H |
| ATOM | 7159 | O  | HOH A | 1 | 1.737  | 43.015 | 29.119 | O |
| ATOM | 7160 | H1 | HOH A | 2 | 2.522  | 42.529 | 28.789 | H |
| ATOM | 7161 | H2 | HOH A | 3 | 0.937  | 42.551 | 28.796 | H |
| ATOM | 7162 | O  | HOH A | 1 | 1.712  | 43.066 | 51.246 | O |
| ATOM | 7163 | H1 | HOH A | 2 | 2.501  | 42.580 | 50.927 | H |
| ATOM | 7164 | H2 | HOH A | 3 | 0.916  | 42.596 | 50.923 | H |
| ATOM | 7165 | O  | HOH A | 1 | 24.331 | 43.134 | 7.004  | O |
| ATOM | 7166 | H1 | HOH A | 2 | 25.122 | 42.654 | 6.681  | H |

|      |      |    |       |   |        |        |        |   |
|------|------|----|-------|---|--------|--------|--------|---|
| ATOM | 7167 | H2 | HOH A | 3 | 23.537 | 42.658 | 6.684  | H |
| ATOM | 7168 | O  | HOH A | 1 | 24.338 | 43.016 | 29.149 | O |
| ATOM | 7169 | H1 | HOH A | 2 | 25.127 | 42.530 | 28.831 | H |
| ATOM | 7170 | H2 | HOH A | 3 | 23.542 | 42.543 | 28.829 | H |
| ATOM | 7171 | O  | HOH A | 1 | 24.350 | 43.064 | 51.236 | O |
| ATOM | 7172 | H1 | HOH A | 2 | 25.136 | 42.577 | 50.911 | H |
| ATOM | 7173 | H2 | HOH A | 3 | 23.551 | 42.594 | 50.918 | H |
| ATOM | 7174 | O  | HOH A | 1 | 46.931 | 43.191 | 6.937  | O |
| ATOM | 7175 | H1 | HOH A | 2 | 47.714 | 42.702 | 6.609  | H |
| ATOM | 7176 | H2 | HOH A | 3 | 46.129 | 42.724 | 6.621  | H |
| ATOM | 7177 | O  | HOH A | 1 | 46.984 | 43.020 | 29.049 | O |
| ATOM | 7178 | H1 | HOH A | 2 | 47.768 | 42.529 | 28.726 | H |
| ATOM | 7179 | H2 | HOH A | 3 | 46.183 | 42.553 | 28.731 | H |
| ATOM | 7180 | O  | HOH A | 1 | 46.938 | 43.105 | 51.195 | O |
| ATOM | 7181 | H1 | HOH A | 2 | 47.723 | 42.613 | 50.875 | H |
| ATOM | 7182 | H2 | HOH A | 3 | 46.137 | 42.635 | 50.881 | H |
| ATOM | 7183 | O  | HOH A | 1 | 6.229  | 42.962 | 7.001  | O |
| ATOM | 7184 | H1 | HOH A | 2 | 7.030  | 42.494 | 6.688  | H |
| ATOM | 7185 | H2 | HOH A | 3 | 6.239  | 42.958 | 7.981  | H |
| ATOM | 7186 | O  | HOH A | 1 | 6.209  | 43.002 | 29.115 | O |
| ATOM | 7187 | H1 | HOH A | 2 | 7.013  | 42.531 | 28.811 | H |
| ATOM | 7188 | H2 | HOH A | 3 | 6.211  | 43.003 | 30.095 | H |
| ATOM | 7189 | O  | HOH A | 1 | 6.197  | 43.043 | 51.267 | O |
| ATOM | 7190 | H1 | HOH A | 2 | 7.000  | 42.572 | 50.962 | H |
| ATOM | 7191 | H2 | HOH A | 3 | 6.202  | 43.047 | 52.247 | H |
| ATOM | 7192 | O  | HOH A | 1 | 28.806 | 43.165 | 7.009  | O |
| ATOM | 7193 | H1 | HOH A | 2 | 29.613 | 42.708 | 6.693  | H |
| ATOM | 7194 | H2 | HOH A | 3 | 28.816 | 43.153 | 7.989  | H |
| ATOM | 7195 | O  | HOH A | 1 | 28.830 | 42.988 | 29.133 | O |
| ATOM | 7196 | H1 | HOH A | 2 | 29.632 | 42.521 | 28.819 | H |
| ATOM | 7197 | H2 | HOH A | 3 | 28.839 | 42.979 | 30.113 | H |
| ATOM | 7198 | O  | HOH A | 1 | 28.815 | 43.059 | 51.226 | O |
| ATOM | 7199 | H1 | HOH A | 2 | 29.622 | 42.595 | 50.919 | H |
| ATOM | 7200 | H2 | HOH A | 3 | 28.823 | 43.064 | 52.206 | H |
| ATOM | 7201 | O  | HOH A | 1 | 51.405 | 43.139 | 6.927  | O |
| ATOM | 7202 | H1 | HOH A | 2 | 52.204 | 42.661 | 6.623  | H |

|      |      |    |       |   |        |        |        |   |
|------|------|----|-------|---|--------|--------|--------|---|
| ATOM | 7203 | H2 | HOH A | 3 | 51.405 | 43.138 | 7.907  | H |
| ATOM | 7204 | O  | HOH A | 1 | 51.445 | 43.002 | 29.065 | O |
| ATOM | 7205 | H1 | HOH A | 2 | 52.248 | 42.537 | 28.748 | H |
| ATOM | 7206 | H2 | HOH A | 3 | 51.457 | 42.991 | 30.045 | H |
| ATOM | 7207 | O  | HOH A | 1 | 51.420 | 43.111 | 51.212 | O |
| ATOM | 7208 | H1 | HOH A | 2 | 52.222 | 42.644 | 50.899 | H |
| ATOM | 7209 | H2 | HOH A | 3 | 51.433 | 43.113 | 52.192 | H |
| ATOM | 7210 | O  | HOH A | 1 | 10.780 | 42.969 | 6.971  | O |
| ATOM | 7211 | H1 | HOH A | 2 | 9.972  | 42.507 | 6.663  | H |
| ATOM | 7212 | H2 | HOH A | 3 | 10.773 | 42.969 | 7.951  | H |
| ATOM | 7213 | O  | HOH A | 1 | 10.752 | 42.980 | 29.114 | O |
| ATOM | 7214 | H1 | HOH A | 2 | 9.944  | 42.520 | 28.805 | H |
| ATOM | 7215 | H2 | HOH A | 3 | 10.739 | 42.992 | 30.094 | H |
| ATOM | 7216 | O  | HOH A | 1 | 10.745 | 43.007 | 51.242 | O |
| ATOM | 7217 | H1 | HOH A | 2 | 9.939  | 42.544 | 50.933 | H |
| ATOM | 7218 | H2 | HOH A | 3 | 10.730 | 43.020 | 52.221 | H |
| ATOM | 7219 | O  | HOH A | 1 | 33.354 | 43.177 | 6.964  | O |
| ATOM | 7220 | H1 | HOH A | 2 | 32.543 | 42.722 | 6.654  | H |
| ATOM | 7221 | H2 | HOH A | 3 | 33.344 | 43.179 | 7.944  | H |
| ATOM | 7222 | O  | HOH A | 1 | 33.379 | 42.978 | 29.096 | O |
| ATOM | 7223 | H1 | HOH A | 2 | 32.572 | 42.516 | 28.789 | H |
| ATOM | 7224 | H2 | HOH A | 3 | 33.369 | 42.987 | 30.076 | H |
| ATOM | 7225 | O  | HOH A | 1 | 33.381 | 43.041 | 51.194 | O |
| ATOM | 7226 | H1 | HOH A | 2 | 32.573 | 42.577 | 50.889 | H |
| ATOM | 7227 | H2 | HOH A | 3 | 33.368 | 43.059 | 52.174 | H |
| ATOM | 7228 | O  | HOH A | 1 | 55.972 | 43.065 | 6.913  | O |
| ATOM | 7229 | H1 | HOH A | 2 | 55.154 | 42.621 | 6.605  | H |
| ATOM | 7230 | H2 | HOH A | 3 | 55.961 | 43.073 | 7.893  | H |
| ATOM | 7231 | O  | HOH A | 1 | 56.002 | 42.976 | 29.038 | O |
| ATOM | 7232 | H1 | HOH A | 2 | 55.194 | 42.518 | 28.725 | H |
| ATOM | 7233 | H2 | HOH A | 3 | 55.987 | 42.979 | 30.018 | H |
| ATOM | 7234 | O  | HOH A | 1 | 55.953 | 43.064 | 51.184 | O |
| ATOM | 7235 | H1 | HOH A | 2 | 55.149 | 42.598 | 50.874 | H |
| ATOM | 7236 | H2 | HOH A | 3 | 55.936 | 43.078 | 52.164 | H |
| ATOM | 7237 | O  | HOH A | 1 | 15.284 | 43.006 | 7.009  | O |
| ATOM | 7238 | H1 | HOH A | 2 | 16.095 | 42.556 | 6.692  | H |

|      |      |    |       |   |        |        |        |   |
|------|------|----|-------|---|--------|--------|--------|---|
| ATOM | 7239 | H2 | HOH A | 3 | 15.298 | 43.000 | 7.989  | H |
| ATOM | 7240 | O  | HOH A | 1 | 15.281 | 42.987 | 29.174 | O |
| ATOM | 7241 | H1 | HOH A | 2 | 16.090 | 42.535 | 28.854 | H |
| ATOM | 7242 | H2 | HOH A | 3 | 15.300 | 42.984 | 30.154 | H |
| ATOM | 7243 | O  | HOH A | 1 | 15.277 | 43.023 | 51.294 | O |
| ATOM | 7244 | H1 | HOH A | 2 | 16.087 | 42.577 | 50.970 | H |
| ATOM | 7245 | H2 | HOH A | 3 | 15.301 | 43.020 | 52.273 | H |
| ATOM | 7246 | O  | HOH A | 1 | 37.875 | 43.192 | 6.980  | O |
| ATOM | 7247 | H1 | HOH A | 2 | 38.687 | 42.746 | 6.660  | H |
| ATOM | 7248 | H2 | HOH A | 3 | 37.891 | 43.183 | 7.959  | H |
| ATOM | 7249 | O  | HOH A | 1 | 37.909 | 42.978 | 29.108 | O |
| ATOM | 7250 | H1 | HOH A | 2 | 38.718 | 42.530 | 28.786 | H |
| ATOM | 7251 | H2 | HOH A | 3 | 37.930 | 42.975 | 30.088 | H |
| ATOM | 7252 | O  | HOH A | 1 | 37.908 | 43.063 | 51.213 | O |
| ATOM | 7253 | H1 | HOH A | 2 | 38.715 | 42.602 | 50.902 | H |
| ATOM | 7254 | H2 | HOH A | 3 | 37.925 | 43.075 | 52.193 | H |
| ATOM | 7255 | O  | HOH A | 1 | 60.498 | 43.007 | 6.974  | O |
| ATOM | 7256 | H1 | HOH A | 2 | 61.309 | 42.555 | 6.661  | H |
| ATOM | 7257 | H2 | HOH A | 3 | 60.508 | 43.004 | 7.954  | H |
| ATOM | 7258 | O  | HOH A | 1 | 60.511 | 42.974 | 29.076 | O |
| ATOM | 7259 | H1 | HOH A | 2 | 61.320 | 42.521 | 28.757 | H |
| ATOM | 7260 | H2 | HOH A | 3 | 60.530 | 42.974 | 30.055 | H |
| ATOM | 7261 | O  | HOH A | 1 | 60.474 | 43.046 | 51.231 | O |
| ATOM | 7262 | H1 | HOH A | 2 | 61.281 | 42.589 | 50.913 | H |
| ATOM | 7263 | H2 | HOH A | 3 | 60.493 | 43.047 | 52.210 | H |
| ATOM | 7264 | O  | HOH A | 1 | 19.830 | 43.061 | 6.986  | O |
| ATOM | 7265 | H1 | HOH A | 2 | 19.026 | 42.607 | 6.658  | H |
| ATOM | 7266 | H2 | HOH A | 3 | 19.817 | 43.981 | 6.650  | H |
| ATOM | 7267 | O  | HOH A | 1 | 19.834 | 42.985 | 29.137 | O |
| ATOM | 7268 | H1 | HOH A | 2 | 19.026 | 42.536 | 28.810 | H |
| ATOM | 7269 | H2 | HOH A | 3 | 19.821 | 43.908 | 28.808 | H |
| ATOM | 7270 | O  | HOH A | 1 | 19.827 | 43.024 | 51.242 | O |
| ATOM | 7271 | H1 | HOH A | 2 | 19.016 | 42.578 | 50.921 | H |
| ATOM | 7272 | H2 | HOH A | 3 | 19.816 | 43.947 | 50.912 | H |
| ATOM | 7273 | O  | HOH A | 1 | 42.434 | 43.190 | 6.945  | O |
| ATOM | 7274 | H1 | HOH A | 2 | 41.624 | 42.741 | 6.623  | H |

|      |      |    |       |   |        |        |        |   |
|------|------|----|-------|---|--------|--------|--------|---|
| ATOM | 7275 | H2 | HOH A | 3 | 42.421 | 44.112 | 6.614  | H |
| ATOM | 7276 | O  | HOH A | 1 | 42.471 | 42.996 | 29.068 | O |
| ATOM | 7277 | H1 | HOH A | 2 | 41.664 | 42.543 | 28.747 | H |
| ATOM | 7278 | H2 | HOH A | 3 | 42.448 | 43.921 | 28.748 | H |
| ATOM | 7279 | O  | HOH A | 1 | 42.442 | 43.076 | 51.178 | O |
| ATOM | 7280 | H1 | HOH A | 2 | 41.633 | 42.622 | 50.860 | H |
| ATOM | 7281 | H2 | HOH A | 3 | 42.426 | 43.995 | 50.839 | H |
| ATOM | 7282 | O  | HOH A | 1 | 65.043 | 43.003 | 6.970  | O |
| ATOM | 7283 | H1 | HOH A | 2 | 64.237 | 42.555 | 6.639  | H |
| ATOM | 7284 | H2 | HOH A | 3 | 65.037 | 43.923 | 6.633  | H |
| ATOM | 7285 | O  | HOH A | 1 | 65.051 | 42.988 | 29.070 | O |
| ATOM | 7286 | H1 | HOH A | 2 | 64.246 | 42.534 | 28.745 | H |
| ATOM | 7287 | H2 | HOH A | 3 | 65.035 | 43.909 | 28.737 | H |
| ATOM | 7288 | O  | HOH A | 1 | 65.018 | 43.055 | 51.229 | O |
| ATOM | 7289 | H1 | HOH A | 2 | 64.214 | 42.603 | 50.897 | H |
| ATOM | 7290 | H2 | HOH A | 3 | 65.008 | 43.976 | 50.895 | H |
| ATOM | 7291 | O  | HOH A | 1 | 1.771  | 45.602 | 6.041  | O |
| ATOM | 7292 | H1 | HOH A | 2 | 1.787  | 44.681 | 6.374  | H |
| ATOM | 7293 | H2 | HOH A | 3 | 2.565  | 46.063 | 6.384  | H |
| ATOM | 7294 | O  | HOH A | 1 | 1.754  | 45.608 | 28.162 | O |
| ATOM | 7295 | H1 | HOH A | 2 | 1.771  | 44.688 | 28.501 | H |
| ATOM | 7296 | H2 | HOH A | 3 | 2.544  | 46.073 | 28.509 | H |
| ATOM | 7297 | O  | HOH A | 1 | 1.721  | 45.654 | 50.309 | O |
| ATOM | 7298 | H1 | HOH A | 2 | 1.740  | 44.734 | 50.648 | H |
| ATOM | 7299 | H2 | HOH A | 3 | 2.515  | 46.118 | 50.647 | H |
| ATOM | 7300 | O  | HOH A | 1 | 24.353 | 45.736 | 6.049  | O |
| ATOM | 7301 | H1 | HOH A | 2 | 24.378 | 44.816 | 6.386  | H |
| ATOM | 7302 | H2 | HOH A | 3 | 25.144 | 46.205 | 6.388  | H |
| ATOM | 7303 | O  | HOH A | 1 | 24.352 | 45.620 | 28.211 | O |
| ATOM | 7304 | H1 | HOH A | 2 | 24.366 | 44.700 | 28.547 | H |
| ATOM | 7305 | H2 | HOH A | 3 | 25.153 | 46.076 | 28.543 | H |
| ATOM | 7306 | O  | HOH A | 1 | 24.354 | 45.658 | 50.285 | O |
| ATOM | 7307 | H1 | HOH A | 2 | 24.380 | 44.738 | 50.623 | H |
| ATOM | 7308 | H2 | HOH A | 3 | 25.152 | 46.124 | 50.612 | H |
| ATOM | 7309 | O  | HOH A | 1 | 46.933 | 45.795 | 5.996  | O |
| ATOM | 7310 | H1 | HOH A | 2 | 46.948 | 44.872 | 6.327  | H |

|      |      |    |       |   |        |        |        |   |
|------|------|----|-------|---|--------|--------|--------|---|
| ATOM | 7311 | H2 | HOH A | 3 | 47.730 | 46.252 | 6.336  | H |
| ATOM | 7312 | O  | HOH A | 1 | 46.980 | 45.624 | 28.105 | O |
| ATOM | 7313 | H1 | HOH A | 2 | 47.004 | 44.701 | 28.433 | H |
| ATOM | 7314 | H2 | HOH A | 3 | 47.777 | 46.086 | 28.440 | H |
| ATOM | 7315 | O  | HOH A | 1 | 46.960 | 45.703 | 50.256 | O |
| ATOM | 7316 | H1 | HOH A | 2 | 46.978 | 44.780 | 50.584 | H |
| ATOM | 7317 | H2 | HOH A | 3 | 47.755 | 46.162 | 50.599 | H |
| ATOM | 7318 | O  | HOH A | 1 | 6.269  | 45.572 | 6.102  | O |
| ATOM | 7319 | H1 | HOH A | 2 | 6.280  | 44.655 | 6.447  | H |
| ATOM | 7320 | H2 | HOH A | 3 | 7.070  | 46.030 | 6.435  | H |
| ATOM | 7321 | O  | HOH A | 1 | 6.251  | 45.610 | 28.222 | O |
| ATOM | 7322 | H1 | HOH A | 2 | 6.262  | 44.690 | 28.560 | H |
| ATOM | 7323 | H2 | HOH A | 3 | 7.052  | 46.065 | 28.557 | H |
| ATOM | 7324 | O  | HOH A | 1 | 6.232  | 45.648 | 50.365 | O |
| ATOM | 7325 | H1 | HOH A | 2 | 6.247  | 44.731 | 50.710 | H |
| ATOM | 7326 | H2 | HOH A | 3 | 7.028  | 46.111 | 50.699 | H |
| ATOM | 7327 | O  | HOH A | 1 | 28.852 | 45.770 | 6.088  | O |
| ATOM | 7328 | H1 | HOH A | 2 | 28.859 | 44.855 | 6.440  | H |
| ATOM | 7329 | H2 | HOH A | 3 | 29.648 | 46.230 | 6.426  | H |
| ATOM | 7330 | O  | HOH A | 1 | 28.860 | 45.599 | 28.240 | O |
| ATOM | 7331 | H1 | HOH A | 2 | 28.871 | 44.677 | 28.573 | H |
| ATOM | 7332 | H2 | HOH A | 3 | 29.662 | 46.052 | 28.574 | H |
| ATOM | 7333 | O  | HOH A | 1 | 28.865 | 45.660 | 50.329 | O |
| ATOM | 7334 | H1 | HOH A | 2 | 28.874 | 44.742 | 50.673 | H |
| ATOM | 7335 | H2 | HOH A | 3 | 29.662 | 46.118 | 50.667 | H |
| ATOM | 7336 | O  | HOH A | 1 | 51.431 | 45.747 | 6.016  | O |
| ATOM | 7337 | H1 | HOH A | 2 | 51.428 | 44.828 | 6.356  | H |
| ATOM | 7338 | H2 | HOH A | 3 | 52.241 | 46.190 | 6.347  | H |
| ATOM | 7339 | O  | HOH A | 1 | 51.483 | 45.613 | 28.157 | O |
| ATOM | 7340 | H1 | HOH A | 2 | 51.486 | 44.693 | 28.496 | H |
| ATOM | 7341 | H2 | HOH A | 3 | 52.288 | 46.061 | 28.489 | H |
| ATOM | 7342 | O  | HOH A | 1 | 51.460 | 45.700 | 50.294 | O |
| ATOM | 7343 | H1 | HOH A | 2 | 51.462 | 44.785 | 50.646 | H |
| ATOM | 7344 | H2 | HOH A | 3 | 52.264 | 46.153 | 50.625 | H |
| ATOM | 7345 | O  | HOH A | 1 | 10.771 | 45.580 | 6.060  | O |
| ATOM | 7346 | H1 | HOH A | 2 | 10.784 | 44.660 | 6.397  | H |



|      |      |    |       |   |        |        |        |   |
|------|------|----|-------|---|--------|--------|--------|---|
| ATOM | 7347 | H2 | HOH A | 3 | 11.569 | 46.038 | 6.397  | H |
| ATOM | 7348 | O  | HOH A | 1 | 10.743 | 45.587 | 28.204 | O |
| ATOM | 7349 | H1 | HOH A | 2 | 10.748 | 44.665 | 28.536 | H |
| ATOM | 7350 | H2 | HOH A | 3 | 11.544 | 46.037 | 28.545 | H |
| ATOM | 7351 | O  | HOH A | 1 | 10.725 | 45.615 | 50.330 | O |
| ATOM | 7352 | H1 | HOH A | 2 | 10.735 | 44.693 | 50.663 | H |
| ATOM | 7353 | H2 | HOH A | 3 | 11.531 | 46.064 | 50.659 | H |
| ATOM | 7354 | O  | HOH A | 1 | 33.350 | 45.789 | 6.051  | O |
| ATOM | 7355 | H1 | HOH A | 2 | 33.361 | 44.868 | 6.385  | H |
| ATOM | 7356 | H2 | HOH A | 3 | 34.149 | 46.243 | 6.391  | H |
| ATOM | 7357 | O  | HOH A | 1 | 33.366 | 45.593 | 28.194 | O |
| ATOM | 7358 | H1 | HOH A | 2 | 33.373 | 44.670 | 28.523 | H |
| ATOM | 7359 | H2 | HOH A | 3 | 34.167 | 46.042 | 28.538 | H |
| ATOM | 7360 | O  | HOH A | 1 | 33.371 | 45.645 | 50.275 | O |
| ATOM | 7361 | H1 | HOH A | 2 | 33.383 | 44.726 | 50.615 | H |
| ATOM | 7362 | H2 | HOH A | 3 | 34.177 | 46.098 | 50.598 | H |
| ATOM | 7363 | O  | HOH A | 1 | 55.949 | 45.680 | 6.007  | O |
| ATOM | 7364 | H1 | HOH A | 2 | 55.957 | 44.758 | 6.340  | H |
| ATOM | 7365 | H2 | HOH A | 3 | 56.751 | 46.131 | 6.345  | H |
| ATOM | 7366 | O  | HOH A | 1 | 55.986 | 45.578 | 28.122 | O |
| ATOM | 7367 | H1 | HOH A | 2 | 55.998 | 44.660 | 28.463 | H |
| ATOM | 7368 | H2 | HOH A | 3 | 56.788 | 46.035 | 28.453 | H |
| ATOM | 7369 | O  | HOH A | 1 | 55.954 | 45.669 | 50.286 | O |
| ATOM | 7370 | H1 | HOH A | 2 | 55.966 | 44.749 | 50.622 | H |
| ATOM | 7371 | H2 | HOH A | 3 | 56.752 | 46.126 | 50.625 | H |
| ATOM | 7372 | O  | HOH A | 1 | 15.307 | 45.629 | 6.104  | O |
| ATOM | 7373 | H1 | HOH A | 2 | 15.304 | 44.698 | 6.410  | H |
| ATOM | 7374 | H2 | HOH A | 3 | 15.309 | 45.626 | 5.124  | H |
| ATOM | 7375 | O  | HOH A | 1 | 15.285 | 45.601 | 28.254 | O |
| ATOM | 7376 | H1 | HOH A | 2 | 15.288 | 44.672 | 28.565 | H |
| ATOM | 7377 | H2 | HOH A | 3 | 15.286 | 45.592 | 27.274 | H |
| ATOM | 7378 | O  | HOH A | 1 | 15.268 | 45.636 | 50.380 | O |
| ATOM | 7379 | H1 | HOH A | 2 | 15.267 | 44.706 | 50.691 | H |
| ATOM | 7380 | H2 | HOH A | 3 | 15.267 | 45.626 | 49.400 | H |
| ATOM | 7381 | O  | HOH A | 1 | 37.879 | 45.823 | 6.084  | O |
| ATOM | 7382 | H1 | HOH A | 2 | 37.881 | 44.892 | 6.390  | H |

|      |      |    |       |   |        |        |        |   |
|------|------|----|-------|---|--------|--------|--------|---|
| ATOM | 7383 | H2 | HOH A | 3 | 37.888 | 45.820 | 5.104  | H |
| ATOM | 7384 | O  | HOH A | 1 | 37.912 | 45.607 | 28.208 | O |
| ATOM | 7385 | H1 | HOH A | 2 | 37.916 | 44.675 | 28.509 | H |
| ATOM | 7386 | H2 | HOH A | 3 | 37.902 | 45.608 | 27.228 | H |
| ATOM | 7387 | O  | HOH A | 1 | 37.921 | 45.679 | 50.305 | O |
| ATOM | 7388 | H1 | HOH A | 2 | 37.922 | 44.752 | 50.624 | H |
| ATOM | 7389 | H2 | HOH A | 3 | 37.915 | 45.663 | 49.325 | H |
| ATOM | 7390 | O  | HOH A | 1 | 60.490 | 45.635 | 6.081  | O |
| ATOM | 7391 | H1 | HOH A | 2 | 60.491 | 44.701 | 6.378  | H |
| ATOM | 7392 | H2 | HOH A | 3 | 60.489 | 45.641 | 5.101  | H |
| ATOM | 7393 | O  | HOH A | 1 | 60.510 | 45.598 | 28.175 | O |
| ATOM | 7394 | H1 | HOH A | 2 | 60.510 | 44.666 | 28.478 | H |
| ATOM | 7395 | H2 | HOH A | 3 | 60.515 | 45.599 | 27.195 | H |
| ATOM | 7396 | O  | HOH A | 1 | 60.473 | 45.658 | 50.340 | O |
| ATOM | 7397 | H1 | HOH A | 2 | 60.475 | 44.730 | 50.654 | H |
| ATOM | 7398 | H2 | HOH A | 3 | 60.471 | 45.646 | 49.360 | H |
| ATOM | 7399 | O  | HOH A | 1 | 19.830 | 45.669 | 6.073  | O |
| ATOM | 7400 | H1 | HOH A | 2 | 20.634 | 46.137 | 6.380  | H |
| ATOM | 7401 | H2 | HOH A | 3 | 19.817 | 45.698 | 5.094  | H |
| ATOM | 7402 | O  | HOH A | 1 | 19.824 | 45.599 | 28.224 | O |
| ATOM | 7403 | H1 | HOH A | 2 | 20.634 | 46.060 | 28.526 | H |
| ATOM | 7404 | H2 | HOH A | 3 | 19.810 | 45.622 | 27.244 | H |
| ATOM | 7405 | O  | HOH A | 1 | 19.814 | 45.633 | 50.341 | O |
| ATOM | 7406 | H1 | HOH A | 2 | 20.627 | 46.092 | 50.640 | H |
| ATOM | 7407 | H2 | HOH A | 3 | 19.800 | 45.649 | 49.361 | H |
| ATOM | 7408 | O  | HOH A | 1 | 42.417 | 45.798 | 6.038  | O |
| ATOM | 7409 | H1 | HOH A | 2 | 43.229 | 46.256 | 6.338  | H |
| ATOM | 7410 | H2 | HOH A | 3 | 42.401 | 45.820 | 5.058  | H |
| ATOM | 7411 | O  | HOH A | 1 | 42.448 | 45.605 | 28.169 | O |
| ATOM | 7412 | H1 | HOH A | 2 | 43.262 | 46.057 | 28.475 | H |
| ATOM | 7413 | H2 | HOH A | 3 | 42.436 | 45.633 | 27.190 | H |
| ATOM | 7414 | O  | HOH A | 1 | 42.441 | 45.678 | 50.263 | O |
| ATOM | 7415 | H1 | HOH A | 2 | 43.250 | 46.139 | 50.567 | H |
| ATOM | 7416 | H2 | HOH A | 3 | 42.437 | 45.687 | 49.283 | H |
| ATOM | 7417 | O  | HOH A | 1 | 65.031 | 45.600 | 6.045  | O |
| ATOM | 7418 | H1 | HOH A | 2 | 65.848 | 46.046 | 6.353  | H |

|      |      |    |       |   |        |        |        |   |
|------|------|----|-------|---|--------|--------|--------|---|
| ATOM | 7419 | H2 | HOH A | 3 | 65.018 | 45.634 | 5.066  | H |
| ATOM | 7420 | O  | HOH A | 1 | 65.039 | 45.594 | 28.150 | O |
| ATOM | 7421 | H1 | HOH A | 2 | 65.848 | 46.054 | 28.456 | H |
| ATOM | 7422 | H2 | HOH A | 3 | 65.032 | 45.612 | 27.170 | H |
| ATOM | 7423 | O  | HOH A | 1 | 65.005 | 45.650 | 50.306 | O |
| ATOM | 7424 | H1 | HOH A | 2 | 65.816 | 46.112 | 50.608 | H |
| ATOM | 7425 | H2 | HOH A | 3 | 64.992 | 45.670 | 49.327 | H |
| ATOM | 7426 | O  | HOH A | 1 | 22.052 | 26.122 | 6.094  | O |
| ATOM | 7427 | H1 | HOH A | 2 | 22.850 | 26.591 | 6.416  | H |
| ATOM | 7428 | H2 | HOH A | 3 | 22.070 | 26.130 | 5.114  | H |
| ATOM | 7429 | O  | HOH A | 1 | 22.027 | 26.017 | 28.248 | O |
| ATOM | 7430 | H1 | HOH A | 2 | 22.832 | 26.476 | 28.566 | H |
| ATOM | 7431 | H2 | HOH A | 3 | 22.036 | 26.030 | 27.269 | H |
| ATOM | 7432 | O  | HOH A | 1 | 22.032 | 26.044 | 50.341 | O |
| ATOM | 7433 | H1 | HOH A | 2 | 22.832 | 26.513 | 50.659 | H |
| ATOM | 7434 | H2 | HOH A | 3 | 22.047 | 26.049 | 49.361 | H |
| ATOM | 7435 | O  | HOH A | 1 | 44.624 | 26.202 | 6.031  | O |
| ATOM | 7436 | H1 | HOH A | 2 | 45.430 | 26.661 | 6.349  | H |
| ATOM | 7437 | H2 | HOH A | 3 | 44.634 | 26.216 | 5.051  | H |
| ATOM | 7438 | O  | HOH A | 1 | 44.673 | 26.023 | 28.178 | O |
| ATOM | 7439 | H1 | HOH A | 2 | 45.475 | 26.487 | 28.495 | H |
| ATOM | 7440 | H2 | HOH A | 3 | 44.686 | 26.032 | 27.198 | H |
| ATOM | 7441 | O  | HOH A | 1 | 44.650 | 26.100 | 50.299 | O |
| ATOM | 7442 | H1 | HOH A | 2 | 45.450 | 26.564 | 50.622 | H |
| ATOM | 7443 | H2 | HOH A | 3 | 44.679 | 26.093 | 49.319 | H |
| ATOM | 7444 | O  | HOH A | 1 | 67.243 | 26.006 | 6.069  | O |
| ATOM | 7445 | H1 | HOH A | 2 | 68.052 | 26.460 | 6.386  | H |
| ATOM | 7446 | H2 | HOH A | 3 | 67.254 | 26.014 | 5.090  | H |
| ATOM | 7447 | O  | HOH A | 1 | 67.229 | 26.004 | 28.182 | O |
| ATOM | 7448 | H1 | HOH A | 2 | 68.030 | 26.468 | 28.506 | H |
| ATOM | 7449 | H2 | HOH A | 3 | 67.251 | 26.011 | 27.202 | H |
| ATOM | 7450 | O  | HOH A | 1 | 67.222 | 26.057 | 50.345 | O |
| ATOM | 7451 | H1 | HOH A | 2 | 68.024 | 26.521 | 50.665 | H |
| ATOM | 7452 | H2 | HOH A | 3 | 67.239 | 26.063 | 49.365 | H |
| ATOM | 7453 | O  | HOH A | 1 | 3.986  | 26.037 | 6.058  | O |
| ATOM | 7454 | H1 | HOH A | 2 | 4.783  | 26.511 | 6.373  | H |

|      |      |    |       |   |        |        |        |   |
|------|------|----|-------|---|--------|--------|--------|---|
| ATOM | 7455 | H2 | HOH A | 3 | 3.997  | 26.044 | 5.078  | H |
| ATOM | 7456 | O  | HOH A | 1 | 3.944  | 26.047 | 28.187 | O |
| ATOM | 7457 | H1 | HOH A | 2 | 4.739  | 26.525 | 28.500 | H |
| ATOM | 7458 | H2 | HOH A | 3 | 3.953  | 26.054 | 27.207 | H |
| ATOM | 7459 | O  | HOH A | 1 | 3.933  | 26.095 | 50.330 | O |
| ATOM | 7460 | H1 | HOH A | 2 | 4.734  | 26.565 | 50.642 | H |
| ATOM | 7461 | H2 | HOH A | 3 | 3.940  | 26.100 | 49.350 | H |
| ATOM | 7462 | O  | HOH A | 1 | 26.553 | 26.207 | 6.059  | O |
| ATOM | 7463 | H1 | HOH A | 2 | 27.347 | 26.686 | 6.378  | H |
| ATOM | 7464 | H2 | HOH A | 3 | 26.567 | 26.218 | 5.079  | H |
| ATOM | 7465 | O  | HOH A | 1 | 26.566 | 26.059 | 28.226 | O |
| ATOM | 7466 | H1 | HOH A | 2 | 27.363 | 26.533 | 28.544 | H |
| ATOM | 7467 | H2 | HOH A | 3 | 26.573 | 26.080 | 27.246 | H |
| ATOM | 7468 | O  | HOH A | 1 | 26.548 | 26.107 | 50.310 | O |
| ATOM | 7469 | H1 | HOH A | 2 | 27.345 | 26.582 | 50.624 | H |
| ATOM | 7470 | H2 | HOH A | 3 | 26.562 | 26.107 | 49.330 | H |
| ATOM | 7471 | O  | HOH A | 1 | 49.142 | 26.225 | 6.021  | O |
| ATOM | 7472 | H1 | HOH A | 2 | 49.941 | 26.693 | 6.340  | H |
| ATOM | 7473 | H2 | HOH A | 3 | 49.152 | 26.240 | 5.041  | H |
| ATOM | 7474 | O  | HOH A | 1 | 49.182 | 26.076 | 28.137 | O |
| ATOM | 7475 | H1 | HOH A | 2 | 49.983 | 26.544 | 28.452 | H |
| ATOM | 7476 | H2 | HOH A | 3 | 49.187 | 26.092 | 27.158 | H |
| ATOM | 7477 | O  | HOH A | 1 | 49.164 | 26.149 | 50.273 | O |
| ATOM | 7478 | H1 | HOH A | 2 | 49.959 | 26.624 | 50.592 | H |
| ATOM | 7479 | H2 | HOH A | 3 | 49.181 | 26.151 | 49.294 | H |
| ATOM | 7480 | O  | HOH A | 1 | 8.508  | 26.002 | 6.120  | O |
| ATOM | 7481 | H1 | HOH A | 2 | 9.306  | 26.469 | 6.445  | H |
| ATOM | 7482 | H2 | HOH A | 3 | 8.525  | 26.019 | 5.140  | H |
| ATOM | 7483 | O  | HOH A | 1 | 8.466  | 26.013 | 28.260 | O |
| ATOM | 7484 | H1 | HOH A | 2 | 9.260  | 26.488 | 28.583 | H |
| ATOM | 7485 | H2 | HOH A | 3 | 8.489  | 26.015 | 27.281 | H |
| ATOM | 7486 | O  | HOH A | 1 | 8.473  | 26.057 | 50.400 | O |
| ATOM | 7487 | H1 | HOH A | 2 | 9.264  | 26.532 | 50.730 | H |
| ATOM | 7488 | H2 | HOH A | 3 | 8.502  | 26.063 | 49.421 | H |
| ATOM | 7489 | O  | HOH A | 1 | 31.073 | 26.203 | 6.116  | O |
| ATOM | 7490 | H1 | HOH A | 2 | 31.864 | 26.679 | 6.445  | H |

|      |      |    |       |   |        |        |        |   |
|------|------|----|-------|---|--------|--------|--------|---|
| ATOM | 7491 | H2 | HOH A | 3 | 31.101 | 26.213 | 5.136  | H |
| ATOM | 7492 | O  | HOH A | 1 | 31.088 | 26.024 | 28.270 | O |
| ATOM | 7493 | H1 | HOH A | 2 | 31.884 | 26.494 | 28.595 | H |
| ATOM | 7494 | H2 | HOH A | 3 | 31.107 | 26.037 | 27.290 | H |
| ATOM | 7495 | O  | HOH A | 1 | 31.092 | 26.073 | 50.359 | O |
| ATOM | 7496 | H1 | HOH A | 2 | 31.886 | 26.549 | 50.679 | H |
| ATOM | 7497 | H2 | HOH A | 3 | 31.114 | 26.071 | 49.379 | H |
| ATOM | 7498 | O  | HOH A | 1 | 53.682 | 26.127 | 6.069  | O |
| ATOM | 7499 | H1 | HOH A | 2 | 54.483 | 26.592 | 6.389  | H |
| ATOM | 7500 | H2 | HOH A | 3 | 53.695 | 26.140 | 5.090  | H |
| ATOM | 7501 | O  | HOH A | 1 | 53.721 | 26.017 | 28.186 | O |
| ATOM | 7502 | H1 | HOH A | 2 | 54.515 | 26.493 | 28.507 | H |
| ATOM | 7503 | H2 | HOH A | 3 | 53.738 | 26.024 | 27.206 | H |
| ATOM | 7504 | O  | HOH A | 1 | 53.685 | 26.104 | 50.340 | O |
| ATOM | 7505 | H1 | HOH A | 2 | 54.476 | 26.580 | 50.668 | H |
| ATOM | 7506 | H2 | HOH A | 3 | 53.717 | 26.102 | 49.361 | H |
| ATOM | 7507 | O  | HOH A | 1 | 13.059 | 26.038 | 6.064  | O |
| ATOM | 7508 | H1 | HOH A | 2 | 12.261 | 26.499 | 6.397  | H |
| ATOM | 7509 | H2 | HOH A | 3 | 13.847 | 26.512 | 6.403  | H |
| ATOM | 7510 | O  | HOH A | 1 | 13.028 | 26.025 | 28.224 | O |
| ATOM | 7511 | H1 | HOH A | 2 | 12.231 | 26.488 | 28.557 | H |
| ATOM | 7512 | H2 | HOH A | 3 | 13.817 | 26.495 | 28.567 | H |
| ATOM | 7513 | O  | HOH A | 1 | 13.012 | 26.065 | 50.341 | O |
| ATOM | 7514 | H1 | HOH A | 2 | 12.222 | 26.534 | 50.683 | H |
| ATOM | 7515 | H2 | HOH A | 3 | 13.807 | 26.535 | 50.667 | H |
| ATOM | 7516 | O  | HOH A | 1 | 35.617 | 26.231 | 6.052  | O |
| ATOM | 7517 | H1 | HOH A | 2 | 34.819 | 26.691 | 6.388  | H |
| ATOM | 7518 | H2 | HOH A | 3 | 36.405 | 26.704 | 6.393  | H |
| ATOM | 7519 | O  | HOH A | 1 | 35.645 | 26.042 | 28.193 | O |
| ATOM | 7520 | H1 | HOH A | 2 | 34.853 | 26.505 | 28.538 | H |
| ATOM | 7521 | H2 | HOH A | 3 | 36.439 | 26.505 | 28.534 | H |
| ATOM | 7522 | O  | HOH A | 1 | 35.647 | 26.094 | 50.271 | O |
| ATOM | 7523 | H1 | HOH A | 2 | 34.853 | 26.560 | 50.608 | H |
| ATOM | 7524 | H2 | HOH A | 3 | 36.439 | 26.562 | 50.609 | H |
| ATOM | 7525 | O  | HOH A | 1 | 58.243 | 26.097 | 6.007  | O |
| ATOM | 7526 | H1 | HOH A | 2 | 57.449 | 26.564 | 6.342  | H |

|      |      |    |       |   |        |        |        |   |
|------|------|----|-------|---|--------|--------|--------|---|
| ATOM | 7527 | H2 | HOH A | 3 | 59.034 | 26.563 | 6.349  | H |
| ATOM | 7528 | O  | HOH A | 1 | 58.251 | 26.033 | 28.142 | O |
| ATOM | 7529 | H1 | HOH A | 2 | 57.453 | 26.492 | 28.478 | H |
| ATOM | 7530 | H2 | HOH A | 3 | 59.039 | 26.507 | 28.480 | H |
| ATOM | 7531 | O  | HOH A | 1 | 58.227 | 26.105 | 50.292 | O |
| ATOM | 7532 | H1 | HOH A | 2 | 57.432 | 26.574 | 50.620 | H |
| ATOM | 7533 | H2 | HOH A | 3 | 59.017 | 26.573 | 50.635 | H |
| ATOM | 7534 | O  | HOH A | 1 | 17.563 | 26.053 | 6.098  | O |
| ATOM | 7535 | H1 | HOH A | 2 | 17.584 | 25.128 | 6.422  | H |
| ATOM | 7536 | H2 | HOH A | 3 | 18.373 | 26.504 | 6.417  | H |
| ATOM | 7537 | O  | HOH A | 1 | 17.532 | 26.006 | 28.264 | O |
| ATOM | 7538 | H1 | HOH A | 2 | 17.550 | 25.080 | 28.584 | H |
| ATOM | 7539 | H2 | HOH A | 3 | 18.346 | 26.452 | 28.581 | H |
| ATOM | 7540 | O  | HOH A | 1 | 17.530 | 26.042 | 50.358 | O |
| ATOM | 7541 | H1 | HOH A | 2 | 17.548 | 25.116 | 50.678 | H |
| ATOM | 7542 | H2 | HOH A | 3 | 18.339 | 26.490 | 50.681 | H |
| ATOM | 7543 | O  | HOH A | 1 | 40.128 | 26.220 | 6.079  | O |
| ATOM | 7544 | H1 | HOH A | 2 | 40.145 | 25.295 | 6.404  | H |
| ATOM | 7545 | H2 | HOH A | 3 | 40.947 | 26.663 | 6.382  | H |
| ATOM | 7546 | O  | HOH A | 1 | 40.172 | 26.018 | 28.205 | O |
| ATOM | 7547 | H1 | HOH A | 2 | 40.187 | 25.094 | 28.530 | H |
| ATOM | 7548 | H2 | HOH A | 3 | 40.983 | 26.466 | 28.525 | H |
| ATOM | 7549 | O  | HOH A | 1 | 40.165 | 26.093 | 50.296 | O |
| ATOM | 7550 | H1 | HOH A | 2 | 40.183 | 25.169 | 50.622 | H |
| ATOM | 7551 | H2 | HOH A | 3 | 40.974 | 26.544 | 50.616 | H |
| ATOM | 7552 | O  | HOH A | 1 | 62.748 | 26.030 | 6.073  | O |
| ATOM | 7553 | H1 | HOH A | 2 | 62.760 | 25.104 | 6.392  | H |
| ATOM | 7554 | H2 | HOH A | 3 | 63.563 | 26.471 | 6.393  | H |
| ATOM | 7555 | O  | HOH A | 1 | 62.742 | 25.999 | 28.198 | O |
| ATOM | 7556 | H1 | HOH A | 2 | 62.760 | 25.077 | 28.530 | H |
| ATOM | 7557 | H2 | HOH A | 3 | 63.552 | 26.451 | 28.514 | H |
| ATOM | 7558 | O  | HOH A | 1 | 62.741 | 26.066 | 50.340 | O |
| ATOM | 7559 | H1 | HOH A | 2 | 62.744 | 25.145 | 50.675 | H |
| ATOM | 7560 | H2 | HOH A | 3 | 63.551 | 26.510 | 50.667 | H |
| ATOM | 7561 | O  | HOH A | 1 | 1.767  | 29.943 | 6.081  | O |
| ATOM | 7562 | H1 | HOH A | 2 | 1.759  | 29.023 | 6.418  | H |

|      |      |    |       |   |        |        |        |   |
|------|------|----|-------|---|--------|--------|--------|---|
| ATOM | 7563 | H2 | HOH A | 3 | 2.571  | 30.385 | 6.425  | H |
| ATOM | 7564 | O  | HOH A | 1 | 1.725  | 29.941 | 28.214 | O |
| ATOM | 7565 | H1 | HOH A | 2 | 1.714  | 29.023 | 28.558 | H |
| ATOM | 7566 | H2 | HOH A | 3 | 2.526  | 30.385 | 28.562 | H |
| ATOM | 7567 | O  | HOH A | 1 | 1.715  | 30.005 | 50.354 | O |
| ATOM | 7568 | H1 | HOH A | 2 | 1.715  | 29.087 | 50.697 | H |
| ATOM | 7569 | H2 | HOH A | 3 | 2.514  | 30.456 | 50.697 | H |
| ATOM | 7570 | O  | HOH A | 1 | 24.353 | 30.083 | 6.104  | O |
| ATOM | 7571 | H1 | HOH A | 2 | 24.355 | 29.169 | 6.456  | H |
| ATOM | 7572 | H2 | HOH A | 3 | 25.149 | 30.541 | 6.446  | H |
| ATOM | 7573 | O  | HOH A | 1 | 24.352 | 29.959 | 28.253 | O |
| ATOM | 7574 | H1 | HOH A | 2 | 24.345 | 29.039 | 28.590 | H |
| ATOM | 7575 | H2 | HOH A | 3 | 25.154 | 30.403 | 28.600 | H |
| ATOM | 7576 | O  | HOH A | 1 | 24.346 | 30.013 | 50.346 | O |
| ATOM | 7577 | H1 | HOH A | 2 | 24.341 | 29.093 | 50.685 | H |
| ATOM | 7578 | H2 | HOH A | 3 | 25.147 | 30.459 | 50.692 | H |
| ATOM | 7579 | O  | HOH A | 1 | 46.920 | 30.146 | 6.047  | O |
| ATOM | 7580 | H1 | HOH A | 2 | 46.906 | 29.228 | 6.389  | H |
| ATOM | 7581 | H2 | HOH A | 3 | 47.725 | 30.586 | 6.392  | H |
| ATOM | 7582 | O  | HOH A | 1 | 46.976 | 29.969 | 28.162 | O |
| ATOM | 7583 | H1 | HOH A | 2 | 46.970 | 29.051 | 28.504 | H |
| ATOM | 7584 | H2 | HOH A | 3 | 47.776 | 30.417 | 28.509 | H |
| ATOM | 7585 | O  | HOH A | 1 | 46.958 | 30.057 | 50.307 | O |
| ATOM | 7586 | H1 | HOH A | 2 | 46.953 | 29.140 | 50.652 | H |
| ATOM | 7587 | H2 | HOH A | 3 | 47.757 | 30.507 | 50.653 | H |
| ATOM | 7588 | O  | HOH A | 1 | 6.302  | 29.923 | 6.087  | O |
| ATOM | 7589 | H1 | HOH A | 2 | 5.511  | 30.408 | 6.404  | H |
| ATOM | 7590 | H2 | HOH A | 3 | 6.281  | 29.919 | 5.107  | H |
| ATOM | 7591 | O  | HOH A | 1 | 6.262  | 29.935 | 28.221 | O |
| ATOM | 7592 | H1 | HOH A | 2 | 5.468  | 30.422 | 28.526 | H |
| ATOM | 7593 | H2 | HOH A | 3 | 6.250  | 29.922 | 27.241 | H |
| ATOM | 7594 | O  | HOH A | 1 | 6.256  | 29.990 | 50.371 | O |
| ATOM | 7595 | H1 | HOH A | 2 | 5.467  | 30.479 | 50.685 | H |
| ATOM | 7596 | H2 | HOH A | 3 | 6.235  | 29.980 | 49.391 | H |
| ATOM | 7597 | O  | HOH A | 1 | 28.882 | 30.120 | 6.096  | O |
| ATOM | 7598 | H1 | HOH A | 2 | 28.086 | 30.600 | 6.406  | H |

|      |      |    |       |   |        |        |        |   |
|------|------|----|-------|---|--------|--------|--------|---|
| ATOM | 7599 | H2 | HOH A | 3 | 28.868 | 30.113 | 5.116  | H |
| ATOM | 7600 | O  | HOH A | 1 | 28.889 | 29.945 | 28.249 | O |
| ATOM | 7601 | H1 | HOH A | 2 | 28.095 | 30.424 | 28.567 | H |
| ATOM | 7602 | H2 | HOH A | 3 | 28.871 | 29.944 | 27.270 | H |
| ATOM | 7603 | O  | HOH A | 1 | 28.885 | 30.005 | 50.339 | O |
| ATOM | 7604 | H1 | HOH A | 2 | 28.094 | 30.493 | 50.651 | H |
| ATOM | 7605 | H2 | HOH A | 3 | 28.861 | 29.984 | 49.360 | H |
| ATOM | 7606 | O  | HOH A | 1 | 51.467 | 30.090 | 6.029  | O |
| ATOM | 7607 | H1 | HOH A | 2 | 50.675 | 30.573 | 6.345  | H |
| ATOM | 7608 | H2 | HOH A | 3 | 51.450 | 30.089 | 5.049  | H |
| ATOM | 7609 | O  | HOH A | 1 | 51.516 | 29.955 | 28.143 | O |
| ATOM | 7610 | H1 | HOH A | 2 | 50.727 | 30.445 | 28.455 | H |
| ATOM | 7611 | H2 | HOH A | 3 | 51.496 | 29.942 | 27.163 | H |
| ATOM | 7612 | O  | HOH A | 1 | 51.483 | 30.042 | 50.306 | O |
| ATOM | 7613 | H1 | HOH A | 2 | 50.694 | 30.536 | 50.615 | H |
| ATOM | 7614 | H2 | HOH A | 3 | 51.465 | 30.024 | 49.327 | H |
| ATOM | 7615 | O  | HOH A | 1 | 10.807 | 29.908 | 6.056  | O |
| ATOM | 7616 | H1 | HOH A | 2 | 10.006 | 30.373 | 6.376  | H |
| ATOM | 7617 | H2 | HOH A | 3 | 10.797 | 29.929 | 5.076  | H |
| ATOM | 7618 | O  | HOH A | 1 | 10.768 | 29.907 | 28.217 | O |
| ATOM | 7619 | H1 | HOH A | 2 | 9.966  | 30.371 | 28.536 | H |
| ATOM | 7620 | H2 | HOH A | 3 | 10.759 | 29.925 | 27.237 | H |
| ATOM | 7621 | O  | HOH A | 1 | 10.766 | 29.950 | 50.341 | O |
| ATOM | 7622 | H1 | HOH A | 2 | 9.968  | 30.419 | 50.664 | H |
| ATOM | 7623 | H2 | HOH A | 3 | 10.748 | 29.959 | 49.361 | H |
| ATOM | 7624 | O  | HOH A | 1 | 33.389 | 30.114 | 6.061  | O |
| ATOM | 7625 | H1 | HOH A | 2 | 32.585 | 30.573 | 6.384  | H |
| ATOM | 7626 | H2 | HOH A | 3 | 33.380 | 30.140 | 5.082  | H |
| ATOM | 7627 | O  | HOH A | 1 | 33.406 | 29.921 | 28.198 | O |
| ATOM | 7628 | H1 | HOH A | 2 | 32.609 | 30.390 | 28.522 | H |
| ATOM | 7629 | H2 | HOH A | 3 | 33.395 | 29.945 | 27.218 | H |
| ATOM | 7630 | O  | HOH A | 1 | 33.404 | 29.972 | 50.291 | O |
| ATOM | 7631 | H1 | HOH A | 2 | 32.605 | 30.438 | 50.616 | H |
| ATOM | 7632 | H2 | HOH A | 3 | 33.384 | 29.984 | 49.311 | H |
| ATOM | 7633 | O  | HOH A | 1 | 55.981 | 30.009 | 6.005  | O |
| ATOM | 7634 | H1 | HOH A | 2 | 55.185 | 30.478 | 6.330  | H |



|      |      |    |       |   |        |        |        |   |
|------|------|----|-------|---|--------|--------|--------|---|
| ATOM | 7635 | H2 | HOH A | 3 | 55.971 | 30.038 | 5.025  | H |
| ATOM | 7636 | O  | HOH A | 1 | 56.017 | 29.905 | 28.124 | O |
| ATOM | 7637 | H1 | HOH A | 2 | 55.216 | 30.366 | 28.449 | H |
| ATOM | 7638 | H2 | HOH A | 3 | 56.004 | 29.929 | 27.144 | H |
| ATOM | 7639 | O  | HOH A | 1 | 55.995 | 29.999 | 50.278 | O |
| ATOM | 7640 | H1 | HOH A | 2 | 55.195 | 30.467 | 50.596 | H |
| ATOM | 7641 | H2 | HOH A | 3 | 55.984 | 30.012 | 49.298 | H |
| ATOM | 7642 | O  | HOH A | 1 | 15.314 | 29.930 | 6.050  | O |
| ATOM | 7643 | H1 | HOH A | 2 | 14.514 | 30.390 | 6.380  | H |
| ATOM | 7644 | H2 | HOH A | 3 | 16.099 | 30.414 | 6.380  | H |
| ATOM | 7645 | O  | HOH A | 1 | 15.279 | 29.909 | 28.226 | O |
| ATOM | 7646 | H1 | HOH A | 2 | 14.486 | 30.382 | 28.553 | H |
| ATOM | 7647 | H2 | HOH A | 3 | 16.072 | 30.385 | 28.551 | H |
| ATOM | 7648 | O  | HOH A | 1 | 15.281 | 29.950 | 50.334 | O |
| ATOM | 7649 | H1 | HOH A | 2 | 14.482 | 30.416 | 50.658 | H |
| ATOM | 7650 | H2 | HOH A | 3 | 16.067 | 30.430 | 50.667 | H |
| ATOM | 7651 | O  | HOH A | 1 | 37.886 | 30.118 | 6.033  | O |
| ATOM | 7652 | H1 | HOH A | 2 | 37.090 | 30.586 | 6.364  | H |
| ATOM | 7653 | H2 | HOH A | 3 | 38.676 | 30.594 | 6.364  | H |
| ATOM | 7654 | O  | HOH A | 1 | 37.924 | 29.911 | 28.153 | O |
| ATOM | 7655 | H1 | HOH A | 2 | 37.132 | 30.377 | 28.495 | H |
| ATOM | 7656 | H2 | HOH A | 3 | 38.718 | 30.383 | 28.480 | H |
| ATOM | 7657 | O  | HOH A | 1 | 37.916 | 29.997 | 50.248 | O |
| ATOM | 7658 | H1 | HOH A | 2 | 37.121 | 30.461 | 50.584 | H |
| ATOM | 7659 | H2 | HOH A | 3 | 38.706 | 30.472 | 50.580 | H |
| ATOM | 7660 | O  | HOH A | 1 | 60.498 | 29.965 | 6.015  | O |
| ATOM | 7661 | H1 | HOH A | 2 | 59.707 | 30.443 | 6.342  | H |
| ATOM | 7662 | H2 | HOH A | 3 | 61.293 | 30.431 | 6.349  | H |
| ATOM | 7663 | O  | HOH A | 1 | 60.508 | 29.916 | 28.137 | O |
| ATOM | 7664 | H1 | HOH A | 2 | 59.711 | 30.376 | 28.474 | H |
| ATOM | 7665 | H2 | HOH A | 3 | 61.297 | 30.389 | 28.474 | H |
| ATOM | 7666 | O  | HOH A | 1 | 60.492 | 29.982 | 50.301 | O |
| ATOM | 7667 | H1 | HOH A | 2 | 59.698 | 30.457 | 50.624 | H |
| ATOM | 7668 | H2 | HOH A | 3 | 61.284 | 30.450 | 50.640 | H |
| ATOM | 7669 | O  | HOH A | 1 | 19.847 | 30.029 | 6.062  | O |
| ATOM | 7670 | H1 | HOH A | 2 | 19.844 | 29.108 | 6.397  | H |

|      |      |    |       |   |        |        |        |   |
|------|------|----|-------|---|--------|--------|--------|---|
| ATOM | 7671 | H2 | HOH A | 3 | 20.643 | 30.478 | 6.415  | H |
| ATOM | 7672 | O  | HOH A | 1 | 19.837 | 29.960 | 28.225 | O |
| ATOM | 7673 | H1 | HOH A | 2 | 19.833 | 29.037 | 28.555 | H |
| ATOM | 7674 | H2 | HOH A | 3 | 20.639 | 30.403 | 28.574 | H |
| ATOM | 7675 | O  | HOH A | 1 | 19.831 | 30.005 | 50.316 | O |
| ATOM | 7676 | H1 | HOH A | 2 | 19.837 | 29.081 | 50.642 | H |
| ATOM | 7677 | H2 | HOH A | 3 | 20.632 | 30.453 | 50.660 | H |
| ATOM | 7678 | O  | HOH A | 1 | 42.426 | 30.153 | 6.014  | O |
| ATOM | 7679 | H1 | HOH A | 2 | 42.428 | 29.231 | 6.346  | H |
| ATOM | 7680 | H2 | HOH A | 3 | 43.226 | 30.602 | 6.359  | H |
| ATOM | 7681 | O  | HOH A | 1 | 42.477 | 29.956 | 28.144 | O |
| ATOM | 7682 | H1 | HOH A | 2 | 42.481 | 29.034 | 28.475 | H |
| ATOM | 7683 | H2 | HOH A | 3 | 43.275 | 30.406 | 28.493 | H |
| ATOM | 7684 | O  | HOH A | 1 | 42.461 | 30.051 | 50.260 | O |
| ATOM | 7685 | H1 | HOH A | 2 | 42.461 | 29.132 | 50.599 | H |
| ATOM | 7686 | H2 | HOH A | 3 | 43.257 | 30.503 | 50.610 | H |
| ATOM | 7687 | O  | HOH A | 1 | 65.043 | 29.958 | 6.038  | O |
| ATOM | 7688 | H1 | HOH A | 2 | 65.037 | 29.036 | 6.370  | H |
| ATOM | 7689 | H2 | HOH A | 3 | 65.847 | 30.399 | 6.382  | H |
| ATOM | 7690 | O  | HOH A | 1 | 65.046 | 29.940 | 28.153 | O |
| ATOM | 7691 | H1 | HOH A | 2 | 65.046 | 29.019 | 28.488 | H |
| ATOM | 7692 | H2 | HOH A | 3 | 65.840 | 30.391 | 28.508 | H |
| ATOM | 7693 | O  | HOH A | 1 | 65.023 | 30.014 | 50.319 | O |
| ATOM | 7694 | H1 | HOH A | 2 | 65.016 | 29.090 | 50.646 | H |
| ATOM | 7695 | H2 | HOH A | 3 | 65.824 | 30.455 | 50.672 | H |
| ATOM | 7696 | O  | HOH A | 1 | 22.108 | 33.978 | 6.073  | O |
| ATOM | 7697 | H1 | HOH A | 2 | 22.083 | 33.062 | 6.421  | H |
| ATOM | 7698 | H2 | HOH A | 3 | 21.301 | 34.441 | 6.379  | H |
| ATOM | 7699 | O  | HOH A | 1 | 22.094 | 33.884 | 28.220 | O |
| ATOM | 7700 | H1 | HOH A | 2 | 22.074 | 32.968 | 28.566 | H |
| ATOM | 7701 | H2 | HOH A | 3 | 21.284 | 34.342 | 28.527 | H |
| ATOM | 7702 | O  | HOH A | 1 | 22.094 | 33.923 | 50.307 | O |
| ATOM | 7703 | H1 | HOH A | 2 | 22.075 | 33.006 | 50.652 | H |
| ATOM | 7704 | H2 | HOH A | 3 | 21.285 | 34.381 | 50.619 | H |
| ATOM | 7705 | O  | HOH A | 1 | 44.695 | 34.086 | 5.997  | O |
| ATOM | 7706 | H1 | HOH A | 2 | 44.667 | 33.169 | 6.342  | H |

|      |      |    |       |   |        |        |        |   |
|------|------|----|-------|---|--------|--------|--------|---|
| ATOM | 7707 | H2 | HOH A | 3 | 43.892 | 34.552 | 6.311  | H |
| ATOM | 7708 | O  | HOH A | 1 | 44.747 | 33.889 | 28.122 | O |
| ATOM | 7709 | H1 | HOH A | 2 | 44.723 | 32.970 | 28.464 | H |
| ATOM | 7710 | H2 | HOH A | 3 | 43.944 | 34.351 | 28.439 | H |
| ATOM | 7711 | O  | HOH A | 1 | 44.715 | 33.982 | 50.246 | O |
| ATOM | 7712 | H1 | HOH A | 2 | 44.693 | 33.066 | 50.594 | H |
| ATOM | 7713 | H2 | HOH A | 3 | 43.906 | 34.442 | 50.553 | H |
| ATOM | 7714 | O  | HOH A | 1 | 67.321 | 33.873 | 6.039  | O |
| ATOM | 7715 | H1 | HOH A | 2 | 67.290 | 32.956 | 6.382  | H |
| ATOM | 7716 | H2 | HOH A | 3 | 66.515 | 34.339 | 6.347  | H |
| ATOM | 7717 | O  | HOH A | 1 | 67.311 | 33.879 | 28.162 | O |
| ATOM | 7718 | H1 | HOH A | 2 | 67.286 | 32.964 | 28.510 | H |
| ATOM | 7719 | H2 | HOH A | 3 | 66.504 | 34.343 | 28.469 | H |
| ATOM | 7720 | O  | HOH A | 1 | 67.288 | 33.925 | 50.307 | O |
| ATOM | 7721 | H1 | HOH A | 2 | 67.263 | 33.008 | 50.651 | H |
| ATOM | 7722 | H2 | HOH A | 3 | 66.476 | 34.384 | 50.607 | H |
| ATOM | 7723 | O  | HOH A | 1 | 4.033  | 33.818 | 6.092  | O |
| ATOM | 7724 | H1 | HOH A | 2 | 4.836  | 34.288 | 6.401  | H |
| ATOM | 7725 | H2 | HOH A | 3 | 4.033  | 33.832 | 5.112  | H |
| ATOM | 7726 | O  | HOH A | 1 | 4.005  | 33.829 | 28.218 | O |
| ATOM | 7727 | H1 | HOH A | 2 | 4.808  | 34.292 | 28.538 | H |
| ATOM | 7728 | H2 | HOH A | 3 | 4.013  | 33.852 | 27.238 | H |
| ATOM | 7729 | O  | HOH A | 1 | 3.984  | 33.902 | 50.343 | O |
| ATOM | 7730 | H1 | HOH A | 2 | 4.785  | 34.373 | 50.655 | H |
| ATOM | 7731 | H2 | HOH A | 3 | 3.988  | 33.912 | 49.364 | H |
| ATOM | 7732 | O  | HOH A | 1 | 26.611 | 34.008 | 6.095  | O |
| ATOM | 7733 | H1 | HOH A | 2 | 27.411 | 34.476 | 6.413  | H |
| ATOM | 7734 | H2 | HOH A | 3 | 26.615 | 34.031 | 5.116  | H |
| ATOM | 7735 | O  | HOH A | 1 | 26.608 | 33.850 | 28.256 | O |
| ATOM | 7736 | H1 | HOH A | 2 | 27.407 | 34.320 | 28.574 | H |
| ATOM | 7737 | H2 | HOH A | 3 | 26.615 | 33.872 | 27.276 | H |
| ATOM | 7738 | O  | HOH A | 1 | 26.598 | 33.905 | 50.327 | O |
| ATOM | 7739 | H1 | HOH A | 2 | 27.399 | 34.375 | 50.640 | H |
| ATOM | 7740 | H2 | HOH A | 3 | 26.605 | 33.914 | 49.347 | H |
| ATOM | 7741 | O  | HOH A | 1 | 49.203 | 34.014 | 6.022  | O |
| ATOM | 7742 | H1 | HOH A | 2 | 50.011 | 34.470 | 6.338  | H |

|      |      |    |       |   |        |        |        |   |
|------|------|----|-------|---|--------|--------|--------|---|
| ATOM | 7743 | H2 | HOH A | 3 | 49.208 | 34.031 | 5.043  | H |
| ATOM | 7744 | O  | HOH A | 1 | 49.251 | 33.849 | 28.139 | O |
| ATOM | 7745 | H1 | HOH A | 2 | 50.050 | 34.325 | 28.447 | H |
| ATOM | 7746 | H2 | HOH A | 3 | 49.244 | 33.871 | 27.159 | H |
| ATOM | 7747 | O  | HOH A | 1 | 49.212 | 33.950 | 50.293 | O |
| ATOM | 7748 | H1 | HOH A | 2 | 50.014 | 34.418 | 50.606 | H |
| ATOM | 7749 | H2 | HOH A | 3 | 49.222 | 33.954 | 49.313 | H |
| ATOM | 7750 | O  | HOH A | 1 | 8.564  | 33.849 | 6.086  | O |
| ATOM | 7751 | H1 | HOH A | 2 | 8.559  | 32.920 | 6.400  | H |
| ATOM | 7752 | H2 | HOH A | 3 | 8.570  | 33.838 | 5.107  | H |
| ATOM | 7753 | O  | HOH A | 1 | 8.515  | 33.859 | 28.218 | O |
| ATOM | 7754 | H1 | HOH A | 2 | 8.522  | 32.932 | 28.535 | H |
| ATOM | 7755 | H2 | HOH A | 3 | 8.516  | 33.844 | 27.238 | H |
| ATOM | 7756 | O  | HOH A | 1 | 8.506  | 33.899 | 50.343 | O |
| ATOM | 7757 | H1 | HOH A | 2 | 8.503  | 32.975 | 50.670 | H |
| ATOM | 7758 | H2 | HOH A | 3 | 8.514  | 33.874 | 49.364 | H |
| ATOM | 7759 | O  | HOH A | 1 | 31.118 | 34.045 | 6.077  | O |
| ATOM | 7760 | H1 | HOH A | 2 | 31.121 | 33.116 | 6.389  | H |
| ATOM | 7761 | H2 | HOH A | 3 | 31.124 | 34.035 | 5.097  | H |
| ATOM | 7762 | O  | HOH A | 1 | 31.146 | 33.865 | 28.217 | O |
| ATOM | 7763 | H1 | HOH A | 2 | 31.148 | 32.936 | 28.530 | H |
| ATOM | 7764 | H2 | HOH A | 3 | 31.147 | 33.854 | 27.238 | H |
| ATOM | 7765 | O  | HOH A | 1 | 31.139 | 33.913 | 50.299 | O |
| ATOM | 7766 | H1 | HOH A | 2 | 31.142 | 32.987 | 50.621 | H |
| ATOM | 7767 | H2 | HOH A | 3 | 31.142 | 33.893 | 49.320 | H |
| ATOM | 7768 | O  | HOH A | 1 | 53.727 | 33.975 | 6.014  | O |
| ATOM | 7769 | H1 | HOH A | 2 | 53.731 | 33.044 | 6.322  | H |
| ATOM | 7770 | H2 | HOH A | 3 | 53.725 | 33.970 | 5.034  | H |
| ATOM | 7771 | O  | HOH A | 1 | 53.771 | 33.857 | 28.132 | O |
| ATOM | 7772 | H1 | HOH A | 2 | 53.775 | 32.929 | 28.446 | H |
| ATOM | 7773 | H2 | HOH A | 3 | 53.767 | 33.846 | 27.152 | H |
| ATOM | 7774 | O  | HOH A | 1 | 53.740 | 33.940 | 50.289 | O |
| ATOM | 7775 | H1 | HOH A | 2 | 53.743 | 33.012 | 50.604 | H |
| ATOM | 7776 | H2 | HOH A | 3 | 53.748 | 33.927 | 49.309 | H |
| ATOM | 7777 | O  | HOH A | 1 | 13.057 | 33.850 | 6.079  | O |
| ATOM | 7778 | H1 | HOH A | 2 | 13.027 | 32.924 | 6.399  | H |

|      |      |    |       |   |        |        |        |   |
|------|------|----|-------|---|--------|--------|--------|---|
| ATOM | 7779 | H2 | HOH A | 3 | 12.262 | 34.313 | 6.417  | H |
| ATOM | 7780 | O  | HOH A | 1 | 13.010 | 33.837 | 28.233 | O |
| ATOM | 7781 | H1 | HOH A | 2 | 12.987 | 32.915 | 28.566 | H |
| ATOM | 7782 | H2 | HOH A | 3 | 12.211 | 34.298 | 28.564 | H |
| ATOM | 7783 | O  | HOH A | 1 | 13.005 | 33.883 | 50.331 | O |
| ATOM | 7784 | H1 | HOH A | 2 | 12.981 | 32.963 | 50.669 | H |
| ATOM | 7785 | H2 | HOH A | 3 | 12.209 | 34.348 | 50.665 | H |
| ATOM | 7786 | O  | HOH A | 1 | 35.619 | 34.054 | 6.050  | O |
| ATOM | 7787 | H1 | HOH A | 2 | 35.595 | 33.132 | 6.382  | H |
| ATOM | 7788 | H2 | HOH A | 3 | 34.822 | 34.517 | 6.384  | H |
| ATOM | 7789 | O  | HOH A | 1 | 35.655 | 33.849 | 28.169 | O |
| ATOM | 7790 | H1 | HOH A | 2 | 35.638 | 32.926 | 28.499 | H |
| ATOM | 7791 | H2 | HOH A | 3 | 34.859 | 34.307 | 28.510 | H |
| ATOM | 7792 | O  | HOH A | 1 | 35.634 | 33.915 | 50.271 | O |
| ATOM | 7793 | H1 | HOH A | 2 | 35.607 | 32.991 | 50.597 | H |
| ATOM | 7794 | H2 | HOH A | 3 | 34.840 | 34.379 | 50.609 | H |
| ATOM | 7795 | O  | HOH A | 1 | 58.224 | 33.910 | 6.011  | O |
| ATOM | 7796 | H1 | HOH A | 2 | 58.192 | 32.989 | 6.345  | H |
| ATOM | 7797 | H2 | HOH A | 3 | 57.432 | 34.381 | 6.343  | H |
| ATOM | 7798 | O  | HOH A | 1 | 58.250 | 33.841 | 28.132 | O |
| ATOM | 7799 | H1 | HOH A | 2 | 58.220 | 32.921 | 28.469 | H |
| ATOM | 7800 | H2 | HOH A | 3 | 57.456 | 34.311 | 28.460 | H |
| ATOM | 7801 | O  | HOH A | 1 | 58.220 | 33.935 | 50.293 | O |
| ATOM | 7802 | H1 | HOH A | 2 | 58.191 | 33.011 | 50.620 | H |
| ATOM | 7803 | H2 | HOH A | 3 | 57.427 | 34.401 | 50.631 | H |
| ATOM | 7804 | O  | HOH A | 1 | 17.592 | 33.899 | 6.087  | O |
| ATOM | 7805 | H1 | HOH A | 2 | 17.579 | 32.972 | 6.406  | H |
| ATOM | 7806 | H2 | HOH A | 3 | 16.782 | 34.343 | 6.412  | H |
| ATOM | 7807 | O  | HOH A | 1 | 17.551 | 33.840 | 28.243 | O |
| ATOM | 7808 | H1 | HOH A | 2 | 17.539 | 32.915 | 28.566 | H |
| ATOM | 7809 | H2 | HOH A | 3 | 16.740 | 34.285 | 28.569 | H |
| ATOM | 7810 | O  | HOH A | 1 | 17.571 | 33.886 | 50.339 | O |
| ATOM | 7811 | H1 | HOH A | 2 | 17.557 | 32.962 | 50.666 | H |
| ATOM | 7812 | H2 | HOH A | 3 | 16.764 | 34.335 | 50.667 | H |
| ATOM | 7813 | O  | HOH A | 1 | 40.171 | 34.056 | 6.038  | O |
| ATOM | 7814 | H1 | HOH A | 2 | 40.162 | 33.131 | 6.361  | H |

|      |      |    |       |   |        |        |        |   |
|------|------|----|-------|---|--------|--------|--------|---|
| ATOM | 7815 | H2 | HOH A | 3 | 39.363 | 34.501 | 6.369  | H |
| ATOM | 7816 | O  | HOH A | 1 | 40.219 | 33.848 | 28.162 | O |
| ATOM | 7817 | H1 | HOH A | 2 | 40.203 | 32.921 | 28.479 | H |
| ATOM | 7818 | H2 | HOH A | 3 | 39.408 | 34.294 | 28.486 | H |
| ATOM | 7819 | O  | HOH A | 1 | 40.200 | 33.936 | 50.267 | O |
| ATOM | 7820 | H1 | HOH A | 2 | 40.192 | 33.011 | 50.591 | H |
| ATOM | 7821 | H2 | HOH A | 3 | 39.389 | 34.378 | 50.594 | H |
| ATOM | 7822 | O  | HOH A | 1 | 62.789 | 33.871 | 6.043  | O |
| ATOM | 7823 | H1 | HOH A | 2 | 62.767 | 32.945 | 6.363  | H |
| ATOM | 7824 | H2 | HOH A | 3 | 61.985 | 34.324 | 6.373  | H |
| ATOM | 7825 | O  | HOH A | 1 | 62.801 | 33.834 | 28.147 | O |
| ATOM | 7826 | H1 | HOH A | 2 | 62.793 | 32.910 | 28.472 | H |
| ATOM | 7827 | H2 | HOH A | 3 | 61.991 | 34.278 | 28.473 | H |
| ATOM | 7828 | O  | HOH A | 1 | 62.765 | 33.913 | 50.318 | O |
| ATOM | 7829 | H1 | HOH A | 2 | 62.752 | 32.988 | 50.642 | H |
| ATOM | 7830 | H2 | HOH A | 3 | 61.956 | 34.360 | 50.644 | H |
| ATOM | 7831 | O  | HOH A | 1 | 1.738  | 37.744 | 6.054  | O |
| ATOM | 7832 | H1 | HOH A | 2 | 1.737  | 36.813 | 6.360  | H |
| ATOM | 7833 | H2 | HOH A | 3 | 1.728  | 37.742 | 5.074  | H |
| ATOM | 7834 | O  | HOH A | 1 | 1.725  | 37.758 | 28.164 | O |
| ATOM | 7835 | H1 | HOH A | 2 | 1.728  | 36.832 | 28.487 | H |
| ATOM | 7836 | H2 | HOH A | 3 | 1.722  | 37.737 | 27.185 | H |
| ATOM | 7837 | O  | HOH A | 1 | 1.701  | 37.822 | 50.312 | O |
| ATOM | 7838 | H1 | HOH A | 2 | 1.701  | 36.893 | 50.624 | H |
| ATOM | 7839 | H2 | HOH A | 3 | 1.691  | 37.813 | 49.332 | H |
| ATOM | 7840 | O  | HOH A | 1 | 24.329 | 37.893 | 6.061  | O |
| ATOM | 7841 | H1 | HOH A | 2 | 24.335 | 36.963 | 6.370  | H |
| ATOM | 7842 | H2 | HOH A | 3 | 24.326 | 37.886 | 5.081  | H |
| ATOM | 7843 | O  | HOH A | 1 | 24.318 | 37.773 | 28.219 | O |
| ATOM | 7844 | H1 | HOH A | 2 | 24.318 | 36.840 | 28.518 | H |
| ATOM | 7845 | H2 | HOH A | 3 | 24.316 | 37.777 | 27.239 | H |
| ATOM | 7846 | O  | HOH A | 1 | 24.317 | 37.828 | 50.301 | O |
| ATOM | 7847 | H1 | HOH A | 2 | 24.314 | 36.900 | 50.617 | H |
| ATOM | 7848 | H2 | HOH A | 3 | 24.311 | 37.814 | 49.321 | H |
| ATOM | 7849 | O  | HOH A | 1 | 46.915 | 37.953 | 6.010  | O |
| ATOM | 7850 | H1 | HOH A | 2 | 46.919 | 37.023 | 6.318  | H |

|      |      |    |       |   |        |        |        |   |
|------|------|----|-------|---|--------|--------|--------|---|
| ATOM | 7851 | H2 | HOH A | 3 | 46.914 | 37.947 | 5.030  | H |
| ATOM | 7852 | O  | HOH A | 1 | 46.974 | 37.789 | 28.117 | O |
| ATOM | 7853 | H1 | HOH A | 2 | 46.977 | 36.859 | 28.426 | H |
| ATOM | 7854 | H2 | HOH A | 3 | 46.958 | 37.782 | 27.138 | H |
| ATOM | 7855 | O  | HOH A | 1 | 46.919 | 37.871 | 50.243 | O |
| ATOM | 7856 | H1 | HOH A | 2 | 46.918 | 36.947 | 50.568 | H |
| ATOM | 7857 | H2 | HOH A | 3 | 46.908 | 37.847 | 49.263 | H |
| ATOM | 7858 | O  | HOH A | 1 | 6.285  | 37.759 | 6.084  | O |
| ATOM | 7859 | H1 | HOH A | 2 | 6.286  | 36.831 | 6.399  | H |
| ATOM | 7860 | H2 | HOH A | 3 | 6.260  | 37.746 | 5.104  | H |
| ATOM | 7861 | O  | HOH A | 1 | 6.261  | 37.773 | 28.213 | O |
| ATOM | 7862 | H1 | HOH A | 2 | 6.265  | 36.847 | 28.533 | H |
| ATOM | 7863 | H2 | HOH A | 3 | 6.245  | 37.756 | 27.234 | H |
| ATOM | 7864 | O  | HOH A | 1 | 6.240  | 37.828 | 50.344 | O |
| ATOM | 7865 | H1 | HOH A | 2 | 6.259  | 36.904 | 50.670 | H |
| ATOM | 7866 | H2 | HOH A | 3 | 6.220  | 37.804 | 49.365 | H |
| ATOM | 7867 | O  | HOH A | 1 | 28.865 | 37.969 | 6.083  | O |
| ATOM | 7868 | H1 | HOH A | 2 | 28.870 | 37.044 | 6.406  | H |
| ATOM | 7869 | H2 | HOH A | 3 | 28.844 | 37.948 | 5.103  | H |
| ATOM | 7870 | O  | HOH A | 1 | 28.866 | 37.777 | 28.217 | O |
| ATOM | 7871 | H1 | HOH A | 2 | 28.871 | 36.848 | 28.528 | H |
| ATOM | 7872 | H2 | HOH A | 3 | 28.845 | 37.769 | 27.238 | H |
| ATOM | 7873 | O  | HOH A | 1 | 28.868 | 37.838 | 50.309 | O |
| ATOM | 7874 | H1 | HOH A | 2 | 28.875 | 36.911 | 50.628 | H |
| ATOM | 7875 | H2 | HOH A | 3 | 28.855 | 37.821 | 49.329 | H |
| ATOM | 7876 | O  | HOH A | 1 | 51.463 | 37.933 | 6.030  | O |
| ATOM | 7877 | H1 | HOH A | 2 | 51.468 | 37.008 | 6.353  | H |
| ATOM | 7878 | H2 | HOH A | 3 | 51.440 | 37.911 | 5.051  | H |
| ATOM | 7879 | O  | HOH A | 1 | 51.526 | 37.796 | 28.130 | O |
| ATOM | 7880 | H1 | HOH A | 2 | 51.534 | 36.869 | 28.447 | H |
| ATOM | 7881 | H2 | HOH A | 3 | 51.505 | 37.781 | 27.150 | H |
| ATOM | 7882 | O  | HOH A | 1 | 51.461 | 37.866 | 50.274 | O |
| ATOM | 7883 | H1 | HOH A | 2 | 51.471 | 36.940 | 50.596 | H |
| ATOM | 7884 | H2 | HOH A | 3 | 51.444 | 37.846 | 49.294 | H |
| ATOM | 7885 | O  | HOH A | 1 | 10.809 | 37.761 | 6.066  | O |
| ATOM | 7886 | H1 | HOH A | 2 | 10.007 | 38.213 | 6.400  | H |

|      |      |    |       |   |        |        |        |   |
|------|------|----|-------|---|--------|--------|--------|---|
| ATOM | 7887 | H2 | HOH A | 3 | 11.592 | 38.242 | 6.407  | H |
| ATOM | 7888 | O  | HOH A | 1 | 10.778 | 37.781 | 28.200 | O |
| ATOM | 7889 | H1 | HOH A | 2 | 9.981  | 38.239 | 28.540 | H |
| ATOM | 7890 | H2 | HOH A | 3 | 11.566 | 38.254 | 28.538 | H |
| ATOM | 7891 | O  | HOH A | 1 | 10.755 | 37.817 | 50.330 | O |
| ATOM | 7892 | H1 | HOH A | 2 | 9.956  | 38.275 | 50.664 | H |
| ATOM | 7893 | H2 | HOH A | 3 | 11.541 | 38.294 | 50.669 | H |
| ATOM | 7894 | O  | HOH A | 1 | 33.364 | 37.982 | 6.053  | O |
| ATOM | 7895 | H1 | HOH A | 2 | 32.568 | 38.441 | 6.393  | H |
| ATOM | 7896 | H2 | HOH A | 3 | 34.153 | 38.457 | 6.390  | H |
| ATOM | 7897 | O  | HOH A | 1 | 33.397 | 37.784 | 28.180 | O |
| ATOM | 7898 | H1 | HOH A | 2 | 32.601 | 38.238 | 28.527 | H |
| ATOM | 7899 | H2 | HOH A | 3 | 34.187 | 38.254 | 28.521 | H |
| ATOM | 7900 | O  | HOH A | 1 | 33.384 | 37.853 | 50.275 | O |
| ATOM | 7901 | H1 | HOH A | 2 | 32.589 | 38.316 | 50.613 | H |
| ATOM | 7902 | H2 | HOH A | 3 | 34.174 | 38.326 | 50.609 | H |
| ATOM | 7903 | O  | HOH A | 1 | 55.975 | 37.877 | 5.993  | O |
| ATOM | 7904 | H1 | HOH A | 2 | 55.187 | 38.347 | 6.335  | H |
| ATOM | 7905 | H2 | HOH A | 3 | 56.772 | 38.335 | 6.333  | H |
| ATOM | 7906 | O  | HOH A | 1 | 56.032 | 37.780 | 28.121 | O |
| ATOM | 7907 | H1 | HOH A | 2 | 55.236 | 38.244 | 28.455 | H |
| ATOM | 7908 | H2 | HOH A | 3 | 56.822 | 38.247 | 28.465 | H |
| ATOM | 7909 | O  | HOH A | 1 | 55.966 | 37.856 | 50.271 | O |
| ATOM | 7910 | H1 | HOH A | 2 | 55.168 | 38.320 | 50.600 | H |
| ATOM | 7911 | H2 | HOH A | 3 | 56.754 | 38.329 | 50.612 | H |
| ATOM | 7912 | O  | HOH A | 1 | 15.311 | 37.764 | 6.122  | O |
| ATOM | 7913 | H1 | HOH A | 2 | 16.109 | 38.242 | 6.430  | H |
| ATOM | 7914 | H2 | HOH A | 3 | 15.311 | 37.773 | 5.142  | H |
| ATOM | 7915 | O  | HOH A | 1 | 15.267 | 37.733 | 28.276 | O |
| ATOM | 7916 | H1 | HOH A | 2 | 16.068 | 38.210 | 28.580 | H |
| ATOM | 7917 | H2 | HOH A | 3 | 15.268 | 37.735 | 27.296 | H |
| ATOM | 7918 | O  | HOH A | 1 | 15.264 | 37.769 | 50.368 | O |
| ATOM | 7919 | H1 | HOH A | 2 | 16.066 | 38.246 | 50.668 | H |
| ATOM | 7920 | H2 | HOH A | 3 | 15.261 | 37.767 | 49.388 | H |
| ATOM | 7921 | O  | HOH A | 1 | 37.883 | 37.944 | 6.077  | O |
| ATOM | 7922 | H1 | HOH A | 2 | 38.683 | 38.422 | 6.381  | H |



|      |      |    |       |   |        |        |        |   |
|------|------|----|-------|---|--------|--------|--------|---|
| ATOM | 7923 | H2 | HOH A | 3 | 37.878 | 37.954 | 5.097  | H |
| ATOM | 7924 | O  | HOH A | 1 | 37.925 | 37.747 | 28.196 | O |
| ATOM | 7925 | H1 | HOH A | 2 | 38.733 | 38.212 | 28.500 | H |
| ATOM | 7926 | H2 | HOH A | 3 | 37.914 | 37.768 | 27.216 | H |
| ATOM | 7927 | O  | HOH A | 1 | 37.897 | 37.806 | 50.318 | O |
| ATOM | 7928 | H1 | HOH A | 2 | 38.699 | 38.285 | 50.614 | H |
| ATOM | 7929 | H2 | HOH A | 3 | 37.897 | 37.794 | 49.338 | H |
| ATOM | 7930 | O  | HOH A | 1 | 60.501 | 37.779 | 6.075  | O |
| ATOM | 7931 | H1 | HOH A | 2 | 61.306 | 38.246 | 6.383  | H |
| ATOM | 7932 | H2 | HOH A | 3 | 60.499 | 37.793 | 5.095  | H |
| ATOM | 7933 | O  | HOH A | 1 | 60.518 | 37.730 | 28.178 | O |
| ATOM | 7934 | H1 | HOH A | 2 | 61.323 | 38.201 | 28.480 | H |
| ATOM | 7935 | H2 | HOH A | 3 | 60.517 | 37.729 | 27.198 | H |
| ATOM | 7936 | O  | HOH A | 1 | 60.467 | 37.809 | 50.344 | O |
| ATOM | 7937 | H1 | HOH A | 2 | 61.272 | 38.279 | 50.648 | H |
| ATOM | 7938 | H2 | HOH A | 3 | 60.467 | 37.811 | 49.364 | H |
| ATOM | 7939 | O  | HOH A | 1 | 19.810 | 37.846 | 6.082  | O |
| ATOM | 7940 | H1 | HOH A | 2 | 20.612 | 38.322 | 6.384  | H |
| ATOM | 7941 | H2 | HOH A | 3 | 19.810 | 37.844 | 5.102  | H |
| ATOM | 7942 | O  | HOH A | 1 | 19.778 | 37.777 | 28.241 | O |
| ATOM | 7943 | H1 | HOH A | 2 | 20.585 | 38.241 | 28.547 | H |
| ATOM | 7944 | H2 | HOH A | 3 | 19.776 | 37.786 | 27.261 | H |
| ATOM | 7945 | O  | HOH A | 1 | 19.786 | 37.815 | 50.347 | O |
| ATOM | 7946 | H1 | HOH A | 2 | 20.586 | 38.296 | 50.645 | H |
| ATOM | 7947 | H2 | HOH A | 3 | 19.784 | 37.807 | 49.367 | H |
| ATOM | 7948 | O  | HOH A | 1 | 42.377 | 37.983 | 6.029  | O |
| ATOM | 7949 | H1 | HOH A | 2 | 43.180 | 38.457 | 6.331  | H |
| ATOM | 7950 | H2 | HOH A | 3 | 42.370 | 37.993 | 5.049  | H |
| ATOM | 7951 | O  | HOH A | 1 | 42.437 | 37.787 | 28.146 | O |
| ATOM | 7952 | H1 | HOH A | 2 | 43.240 | 38.262 | 28.446 | H |
| ATOM | 7953 | H2 | HOH A | 3 | 42.428 | 37.795 | 27.166 | H |
| ATOM | 7954 | O  | HOH A | 1 | 42.414 | 37.860 | 50.275 | O |
| ATOM | 7955 | H1 | HOH A | 2 | 43.210 | 38.345 | 50.578 | H |
| ATOM | 7956 | H2 | HOH A | 3 | 42.419 | 37.851 | 49.295 | H |
| ATOM | 7957 | O  | HOH A | 1 | 65.011 | 37.786 | 6.061  | O |
| ATOM | 7958 | H1 | HOH A | 2 | 65.814 | 38.258 | 6.367  | H |

|      |      |    |       |   |        |        |        |   |
|------|------|----|-------|---|--------|--------|--------|---|
| ATOM | 7959 | H2 | HOH A | 3 | 65.010 | 37.796 | 5.081  | H |
| ATOM | 7960 | O  | HOH A | 1 | 65.014 | 37.767 | 28.159 | O |
| ATOM | 7961 | H1 | HOH A | 2 | 65.813 | 38.245 | 28.466 | H |
| ATOM | 7962 | H2 | HOH A | 3 | 65.017 | 37.772 | 27.179 | H |
| ATOM | 7963 | O  | HOH A | 1 | 64.980 | 37.827 | 50.322 | O |
| ATOM | 7964 | H1 | HOH A | 2 | 65.776 | 38.310 | 50.626 | H |
| ATOM | 7965 | H2 | HOH A | 3 | 64.981 | 37.827 | 49.342 | H |
| ATOM | 7966 | O  | HOH A | 1 | 22.093 | 41.791 | 6.060  | O |
| ATOM | 7967 | H1 | HOH A | 2 | 22.095 | 40.871 | 6.396  | H |
| ATOM | 7968 | H2 | HOH A | 3 | 21.285 | 42.234 | 6.395  | H |
| ATOM | 7969 | O  | HOH A | 1 | 22.096 | 41.688 | 28.218 | O |
| ATOM | 7970 | H1 | HOH A | 2 | 22.088 | 40.769 | 28.557 | H |
| ATOM | 7971 | H2 | HOH A | 3 | 21.290 | 42.138 | 28.547 | H |
| ATOM | 7972 | O  | HOH A | 1 | 22.099 | 41.755 | 50.319 | O |
| ATOM | 7973 | H1 | HOH A | 2 | 22.098 | 40.836 | 50.659 | H |
| ATOM | 7974 | H2 | HOH A | 3 | 21.287 | 42.199 | 50.641 | H |
| ATOM | 7975 | O  | HOH A | 1 | 44.675 | 41.900 | 6.003  | O |
| ATOM | 7976 | H1 | HOH A | 2 | 44.671 | 40.980 | 6.341  | H |
| ATOM | 7977 | H2 | HOH A | 3 | 43.869 | 42.348 | 6.335  | H |
| ATOM | 7978 | O  | HOH A | 1 | 44.726 | 41.721 | 28.130 | O |
| ATOM | 7979 | H1 | HOH A | 2 | 44.724 | 40.799 | 28.462 | H |
| ATOM | 7980 | H2 | HOH A | 3 | 43.924 | 42.168 | 28.472 | H |
| ATOM | 7981 | O  | HOH A | 1 | 44.687 | 41.798 | 50.250 | O |
| ATOM | 7982 | H1 | HOH A | 2 | 44.681 | 40.881 | 50.596 | H |
| ATOM | 7983 | H2 | HOH A | 3 | 43.881 | 42.250 | 50.576 | H |
| ATOM | 7984 | O  | HOH A | 1 | 67.294 | 41.704 | 6.051  | O |
| ATOM | 7985 | H1 | HOH A | 2 | 67.294 | 40.785 | 6.390  | H |
| ATOM | 7986 | H2 | HOH A | 3 | 66.489 | 42.151 | 6.385  | H |
| ATOM | 7987 | O  | HOH A | 1 | 67.298 | 41.707 | 28.153 | O |
| ATOM | 7988 | H1 | HOH A | 2 | 67.302 | 40.789 | 28.496 | H |
| ATOM | 7989 | H2 | HOH A | 3 | 66.489 | 42.150 | 28.483 | H |
| ATOM | 7990 | O  | HOH A | 1 | 67.270 | 41.764 | 50.305 | O |
| ATOM | 7991 | H1 | HOH A | 2 | 67.263 | 40.848 | 50.653 | H |
| ATOM | 7992 | H2 | HOH A | 3 | 66.466 | 42.218 | 50.633 | H |
| ATOM | 7993 | O  | HOH A | 1 | 3.979  | 41.640 | 6.086  | O |
| ATOM | 7994 | H1 | HOH A | 2 | 3.984  | 40.717 | 6.416  | H |

|      |      |    |       |   |        |        |        |   |
|------|------|----|-------|---|--------|--------|--------|---|
| ATOM | 7995 | H2 | HOH A | 3 | 4.780  | 42.088 | 6.429  | H |
| ATOM | 7996 | O  | HOH A | 1 | 3.971  | 41.669 | 28.200 | O |
| ATOM | 7997 | H1 | HOH A | 2 | 3.973  | 40.749 | 28.538 | H |
| ATOM | 7998 | H2 | HOH A | 3 | 4.770  | 42.120 | 28.545 | H |
| ATOM | 7999 | O  | HOH A | 1 | 3.952  | 41.713 | 50.355 | O |
| ATOM | 8000 | H1 | HOH A | 2 | 3.944  | 40.792 | 50.690 | H |
| ATOM | 8001 | H2 | HOH A | 3 | 4.755  | 42.155 | 50.701 | H |
| ATOM | 8002 | O  | HOH A | 1 | 26.576 | 41.822 | 6.081  | O |
| ATOM | 8003 | H1 | HOH A | 2 | 26.570 | 40.903 | 6.421  | H |
| ATOM | 8004 | H2 | HOH A | 3 | 27.376 | 42.269 | 6.428  | H |
| ATOM | 8005 | O  | HOH A | 1 | 26.581 | 41.665 | 28.238 | O |
| ATOM | 8006 | H1 | HOH A | 2 | 26.581 | 40.744 | 28.573 | H |
| ATOM | 8007 | H2 | HOH A | 3 | 27.383 | 42.112 | 28.581 | H |
| ATOM | 8008 | O  | HOH A | 1 | 26.584 | 41.722 | 50.313 | O |
| ATOM | 8009 | H1 | HOH A | 2 | 26.577 | 40.804 | 50.656 | H |
| ATOM | 8010 | H2 | HOH A | 3 | 27.388 | 42.166 | 50.655 | H |
| ATOM | 8011 | O  | HOH A | 1 | 49.160 | 41.828 | 6.015  | O |
| ATOM | 8012 | H1 | HOH A | 2 | 49.163 | 40.906 | 6.349  | H |
| ATOM | 8013 | H2 | HOH A | 3 | 49.962 | 42.276 | 6.356  | H |
| ATOM | 8014 | O  | HOH A | 1 | 49.218 | 41.674 | 28.130 | O |
| ATOM | 8015 | H1 | HOH A | 2 | 49.218 | 40.752 | 28.463 | H |
| ATOM | 8016 | H2 | HOH A | 3 | 50.012 | 42.125 | 28.487 | H |
| ATOM | 8017 | O  | HOH A | 1 | 49.181 | 41.767 | 50.287 | O |
| ATOM | 8018 | H1 | HOH A | 2 | 49.185 | 40.847 | 50.625 | H |
| ATOM | 8019 | H2 | HOH A | 3 | 49.974 | 42.222 | 50.638 | H |
| ATOM | 8020 | O  | HOH A | 1 | 8.503  | 41.679 | 6.073  | O |
| ATOM | 8021 | H1 | HOH A | 2 | 8.510  | 40.754 | 6.397  | H |
| ATOM | 8022 | H2 | HOH A | 3 | 8.486  | 41.655 | 5.093  | H |
| ATOM | 8023 | O  | HOH A | 1 | 8.477  | 41.698 | 28.208 | O |
| ATOM | 8024 | H1 | HOH A | 2 | 8.473  | 40.775 | 28.537 | H |
| ATOM | 8025 | H2 | HOH A | 3 | 8.469  | 41.670 | 27.228 | H |
| ATOM | 8026 | O  | HOH A | 1 | 8.462  | 41.743 | 50.333 | O |
| ATOM | 8027 | H1 | HOH A | 2 | 8.448  | 40.818 | 50.658 | H |
| ATOM | 8028 | H2 | HOH A | 3 | 8.448  | 41.720 | 49.354 | H |
| ATOM | 8029 | O  | HOH A | 1 | 31.082 | 41.897 | 6.063  | O |
| ATOM | 8030 | H1 | HOH A | 2 | 31.075 | 40.971 | 6.382  | H |

|      |      |    |       |   |        |        |        |   |
|------|------|----|-------|---|--------|--------|--------|---|
| ATOM | 8031 | H2 | HOH A | 3 | 31.072 | 41.881 | 5.083  | H |
| ATOM | 8032 | O  | HOH A | 1 | 31.097 | 41.704 | 28.193 | O |
| ATOM | 8033 | H1 | HOH A | 2 | 31.084 | 40.774 | 28.503 | H |
| ATOM | 8034 | H2 | HOH A | 3 | 31.084 | 41.697 | 27.213 | H |
| ATOM | 8035 | O  | HOH A | 1 | 31.093 | 41.769 | 50.293 | O |
| ATOM | 8036 | H1 | HOH A | 2 | 31.091 | 40.844 | 50.616 | H |
| ATOM | 8037 | H2 | HOH A | 3 | 31.078 | 41.748 | 49.313 | H |
| ATOM | 8038 | O  | HOH A | 1 | 53.679 | 41.834 | 6.011  | O |
| ATOM | 8039 | H1 | HOH A | 2 | 53.683 | 40.907 | 6.327  | H |
| ATOM | 8040 | H2 | HOH A | 3 | 53.665 | 41.820 | 5.031  | H |
| ATOM | 8041 | O  | HOH A | 1 | 53.722 | 41.710 | 28.130 | O |
| ATOM | 8042 | H1 | HOH A | 2 | 53.715 | 40.784 | 28.452 | H |
| ATOM | 8043 | H2 | HOH A | 3 | 53.716 | 41.690 | 27.151 | H |
| ATOM | 8044 | O  | HOH A | 1 | 53.674 | 41.787 | 50.267 | O |
| ATOM | 8045 | H1 | HOH A | 2 | 53.661 | 40.862 | 50.591 | H |
| ATOM | 8046 | H2 | HOH A | 3 | 53.661 | 41.764 | 49.288 | H |
| ATOM | 8047 | O  | HOH A | 1 | 13.044 | 41.662 | 6.091  | O |
| ATOM | 8048 | H1 | HOH A | 2 | 12.245 | 42.125 | 6.419  | H |
| ATOM | 8049 | H2 | HOH A | 3 | 13.830 | 42.133 | 6.439  | H |
| ATOM | 8050 | O  | HOH A | 1 | 13.021 | 41.663 | 28.241 | O |
| ATOM | 8051 | H1 | HOH A | 2 | 12.221 | 42.123 | 28.570 | H |
| ATOM | 8052 | H2 | HOH A | 3 | 13.806 | 42.133 | 28.593 | H |
| ATOM | 8053 | O  | HOH A | 1 | 13.020 | 41.701 | 50.366 | O |
| ATOM | 8054 | H1 | HOH A | 2 | 12.224 | 42.167 | 50.697 | H |
| ATOM | 8055 | H2 | HOH A | 3 | 13.810 | 42.164 | 50.715 | H |
| ATOM | 8056 | O  | HOH A | 1 | 35.613 | 41.868 | 6.056  | O |
| ATOM | 8057 | H1 | HOH A | 2 | 34.815 | 42.324 | 6.397  | H |
| ATOM | 8058 | H2 | HOH A | 3 | 36.400 | 42.335 | 6.405  | H |
| ATOM | 8059 | O  | HOH A | 1 | 35.645 | 41.663 | 28.199 | O |
| ATOM | 8060 | H1 | HOH A | 2 | 34.851 | 42.129 | 28.535 | H |
| ATOM | 8061 | H2 | HOH A | 3 | 36.437 | 42.126 | 28.544 | H |
| ATOM | 8062 | O  | HOH A | 1 | 35.649 | 41.737 | 50.290 | O |
| ATOM | 8063 | H1 | HOH A | 2 | 34.850 | 42.195 | 50.626 | H |
| ATOM | 8064 | H2 | HOH A | 3 | 36.436 | 42.206 | 50.638 | H |
| ATOM | 8065 | O  | HOH A | 1 | 58.230 | 41.712 | 6.051  | O |
| ATOM | 8066 | H1 | HOH A | 2 | 57.440 | 42.185 | 6.385  | H |

|      |      |    |       |   |        |        |        |   |
|------|------|----|-------|---|--------|--------|--------|---|
| ATOM | 8067 | H2 | HOH A | 3 | 59.025 | 42.169 | 6.395  | H |
| ATOM | 8068 | O  | HOH A | 1 | 58.263 | 41.662 | 28.148 | O |
| ATOM | 8069 | H1 | HOH A | 2 | 57.465 | 42.123 | 28.482 | H |
| ATOM | 8070 | H2 | HOH A | 3 | 59.050 | 42.130 | 28.496 | H |
| ATOM | 8071 | O  | HOH A | 1 | 58.209 | 41.737 | 50.302 | O |
| ATOM | 8072 | H1 | HOH A | 2 | 57.415 | 42.206 | 50.632 | H |
| ATOM | 8073 | H2 | HOH A | 3 | 59.000 | 42.197 | 50.653 | H |
| ATOM | 8074 | O  | HOH A | 1 | 17.560 | 41.738 | 6.101  | O |
| ATOM | 8075 | H1 | HOH A | 2 | 17.549 | 40.812 | 6.421  | H |
| ATOM | 8076 | H2 | HOH A | 3 | 17.554 | 41.719 | 5.121  | H |
| ATOM | 8077 | O  | HOH A | 1 | 17.553 | 41.692 | 28.246 | O |
| ATOM | 8078 | H1 | HOH A | 2 | 17.545 | 40.766 | 28.569 | H |
| ATOM | 8079 | H2 | HOH A | 3 | 17.547 | 41.671 | 27.267 | H |
| ATOM | 8080 | O  | HOH A | 1 | 17.542 | 41.730 | 50.349 | O |
| ATOM | 8081 | H1 | HOH A | 2 | 17.524 | 40.806 | 50.673 | H |
| ATOM | 8082 | H2 | HOH A | 3 | 17.537 | 41.708 | 49.370 | H |
| ATOM | 8083 | O  | HOH A | 1 | 40.152 | 41.909 | 6.055  | O |
| ATOM | 8084 | H1 | HOH A | 2 | 40.138 | 40.982 | 6.373  | H |
| ATOM | 8085 | H2 | HOH A | 3 | 40.145 | 41.892 | 5.075  | H |
| ATOM | 8086 | O  | HOH A | 1 | 40.194 | 41.705 | 28.179 | O |
| ATOM | 8087 | H1 | HOH A | 2 | 40.193 | 40.775 | 28.488 | H |
| ATOM | 8088 | H2 | HOH A | 3 | 40.181 | 41.698 | 27.199 | H |
| ATOM | 8089 | O  | HOH A | 1 | 40.175 | 41.762 | 50.290 | O |
| ATOM | 8090 | H1 | HOH A | 2 | 40.168 | 40.836 | 50.613 | H |
| ATOM | 8091 | H2 | HOH A | 3 | 40.175 | 41.741 | 49.311 | H |
| ATOM | 8092 | O  | HOH A | 1 | 62.769 | 41.703 | 6.058  | O |
| ATOM | 8093 | H1 | HOH A | 2 | 62.756 | 40.775 | 6.373  | H |
| ATOM | 8094 | H2 | HOH A | 3 | 62.759 | 41.691 | 5.079  | H |
| ATOM | 8095 | O  | HOH A | 1 | 62.786 | 41.684 | 28.162 | O |
| ATOM | 8096 | H1 | HOH A | 2 | 62.770 | 40.756 | 28.477 | H |
| ATOM | 8097 | H2 | HOH A | 3 | 62.783 | 41.671 | 27.183 | H |
| ATOM | 8098 | O  | HOH A | 1 | 62.750 | 41.745 | 50.321 | O |
| ATOM | 8099 | H1 | HOH A | 2 | 62.737 | 40.822 | 50.651 | H |
| ATOM | 8100 | H2 | HOH A | 3 | 62.749 | 41.717 | 49.342 | H |
| ATOM | 8101 | O  | HOH A | 1 | 1.746  | 45.594 | 3.283  | O |
| ATOM | 8102 | H1 | HOH A | 2 | 1.736  | 44.661 | 2.983  | H |

|      |      |    |       |   |        |        |        |   |
|------|------|----|-------|---|--------|--------|--------|---|
| ATOM | 8103 | H2 | HOH A | 3 | 1.760  | 45.597 | 4.263  | H |
| ATOM | 8104 | O  | HOH A | 1 | 1.760  | 45.574 | 25.399 | O |
| ATOM | 8105 | H1 | HOH A | 2 | 1.751  | 44.642 | 25.097 | H |
| ATOM | 8106 | H2 | HOH A | 3 | 1.769  | 45.574 | 26.379 | H |
| ATOM | 8107 | O  | HOH A | 1 | 1.725  | 45.605 | 47.545 | O |
| ATOM | 8108 | H1 | HOH A | 2 | 1.718  | 44.672 | 47.246 | H |
| ATOM | 8109 | H2 | HOH A | 3 | 1.733  | 45.610 | 48.525 | H |
| ATOM | 8110 | O  | HOH A | 1 | 24.359 | 45.732 | 3.281  | O |
| ATOM | 8111 | H1 | HOH A | 2 | 24.348 | 44.802 | 2.971  | H |
| ATOM | 8112 | H2 | HOH A | 3 | 24.359 | 45.723 | 4.261  | H |
| ATOM | 8113 | O  | HOH A | 1 | 24.360 | 45.606 | 25.449 | O |
| ATOM | 8114 | H1 | HOH A | 2 | 24.352 | 44.675 | 25.143 | H |
| ATOM | 8115 | H2 | HOH A | 3 | 24.364 | 45.603 | 26.429 | H |
| ATOM | 8116 | O  | HOH A | 1 | 24.348 | 45.610 | 47.526 | O |
| ATOM | 8117 | H1 | HOH A | 2 | 24.337 | 44.676 | 47.229 | H |
| ATOM | 8118 | H2 | HOH A | 3 | 24.358 | 45.617 | 48.506 | H |
| ATOM | 8119 | O  | HOH A | 1 | 46.943 | 45.789 | 3.238  | O |
| ATOM | 8120 | H1 | HOH A | 2 | 46.939 | 44.858 | 2.931  | H |
| ATOM | 8121 | H2 | HOH A | 3 | 46.944 | 45.784 | 4.218  | H |
| ATOM | 8122 | O  | HOH A | 1 | 46.977 | 45.613 | 25.350 | O |
| ATOM | 8123 | H1 | HOH A | 2 | 46.977 | 44.683 | 25.042 | H |
| ATOM | 8124 | H2 | HOH A | 3 | 46.986 | 45.608 | 26.329 | H |
| ATOM | 8125 | O  | HOH A | 1 | 46.977 | 45.639 | 47.494 | O |
| ATOM | 8126 | H1 | HOH A | 2 | 46.969 | 44.705 | 47.197 | H |
| ATOM | 8127 | H2 | HOH A | 3 | 46.979 | 45.646 | 48.474 | H |
| ATOM | 8128 | O  | HOH A | 1 | 6.268  | 45.591 | 3.344  | O |
| ATOM | 8129 | H1 | HOH A | 2 | 5.462  | 46.059 | 3.043  | H |
| ATOM | 8130 | H2 | HOH A | 3 | 6.267  | 45.585 | 4.324  | H |
| ATOM | 8131 | O  | HOH A | 1 | 6.250  | 45.586 | 25.465 | O |
| ATOM | 8132 | H1 | HOH A | 2 | 5.446  | 46.056 | 25.158 | H |
| ATOM | 8133 | H2 | HOH A | 3 | 6.248  | 45.591 | 26.445 | H |
| ATOM | 8134 | O  | HOH A | 1 | 6.227  | 45.616 | 47.607 | O |
| ATOM | 8135 | H1 | HOH A | 2 | 5.428  | 46.091 | 47.296 | H |
| ATOM | 8136 | H2 | HOH A | 3 | 6.224  | 45.626 | 48.587 | H |
| ATOM | 8137 | O  | HOH A | 1 | 28.868 | 45.773 | 3.327  | O |
| ATOM | 8138 | H1 | HOH A | 2 | 28.062 | 46.237 | 3.020  | H |

|      |      |    |       |   |        |        |        |   |
|------|------|----|-------|---|--------|--------|--------|---|
| ATOM | 8139 | H2 | HOH A | 3 | 28.862 | 45.771 | 4.306  | H |
| ATOM | 8140 | O  | HOH A | 1 | 28.864 | 45.636 | 25.478 | O |
| ATOM | 8141 | H1 | HOH A | 2 | 28.063 | 46.116 | 25.181 | H |
| ATOM | 8142 | H2 | HOH A | 3 | 28.864 | 45.623 | 26.458 | H |
| ATOM | 8143 | O  | HOH A | 1 | 28.868 | 45.627 | 47.571 | O |
| ATOM | 8144 | H1 | HOH A | 2 | 28.061 | 46.095 | 47.272 | H |
| ATOM | 8145 | H2 | HOH A | 3 | 28.875 | 45.630 | 48.551 | H |
| ATOM | 8146 | O  | HOH A | 1 | 51.439 | 45.762 | 3.266  | O |
| ATOM | 8147 | H1 | HOH A | 2 | 50.637 | 46.237 | 2.962  | H |
| ATOM | 8148 | H2 | HOH A | 3 | 51.432 | 45.755 | 4.246  | H |
| ATOM | 8149 | O  | HOH A | 1 | 51.472 | 45.617 | 25.397 | O |
| ATOM | 8150 | H1 | HOH A | 2 | 50.666 | 46.089 | 25.101 | H |
| ATOM | 8151 | H2 | HOH A | 3 | 51.478 | 45.614 | 26.377 | H |
| ATOM | 8152 | O  | HOH A | 1 | 51.469 | 45.647 | 47.537 | O |
| ATOM | 8153 | H1 | HOH A | 2 | 50.662 | 46.112 | 47.231 | H |
| ATOM | 8154 | H2 | HOH A | 3 | 51.470 | 45.656 | 48.517 | H |
| ATOM | 8155 | O  | HOH A | 1 | 10.778 | 45.604 | 3.301  | O |
| ATOM | 8156 | H1 | HOH A | 2 | 11.586 | 46.062 | 2.986  | H |
| ATOM | 8157 | H2 | HOH A | 3 | 10.796 | 45.599 | 4.281  | H |
| ATOM | 8158 | O  | HOH A | 1 | 10.760 | 45.576 | 25.437 | O |
| ATOM | 8159 | H1 | HOH A | 2 | 11.569 | 46.034 | 25.124 | H |
| ATOM | 8160 | H2 | HOH A | 3 | 10.767 | 45.586 | 26.417 | H |
| ATOM | 8161 | O  | HOH A | 1 | 10.738 | 45.599 | 47.560 | O |
| ATOM | 8162 | H1 | HOH A | 2 | 11.545 | 46.058 | 47.247 | H |
| ATOM | 8163 | H2 | HOH A | 3 | 10.749 | 45.601 | 48.540 | H |
| ATOM | 8164 | O  | HOH A | 1 | 33.379 | 45.815 | 3.281  | O |
| ATOM | 8165 | H1 | HOH A | 2 | 34.184 | 46.282 | 2.972  | H |
| ATOM | 8166 | H2 | HOH A | 3 | 33.391 | 45.808 | 4.261  | H |
| ATOM | 8167 | O  | HOH A | 1 | 33.387 | 45.627 | 25.433 | O |
| ATOM | 8168 | H1 | HOH A | 2 | 34.195 | 46.085 | 25.120 | H |
| ATOM | 8169 | H2 | HOH A | 3 | 33.401 | 45.625 | 26.413 | H |
| ATOM | 8170 | O  | HOH A | 1 | 33.381 | 45.602 | 47.510 | O |
| ATOM | 8171 | H1 | HOH A | 2 | 34.187 | 46.064 | 47.199 | H |
| ATOM | 8172 | H2 | HOH A | 3 | 33.388 | 45.607 | 48.490 | H |
| ATOM | 8173 | O  | HOH A | 1 | 55.953 | 45.691 | 3.247  | O |
| ATOM | 8174 | H1 | HOH A | 2 | 56.763 | 46.149 | 2.938  | H |

|      |      |    |       |   |        |        |        |   |
|------|------|----|-------|---|--------|--------|--------|---|
| ATOM | 8175 | H2 | HOH A | 3 | 55.962 | 45.689 | 4.227  | H |
| ATOM | 8176 | O  | HOH A | 1 | 55.994 | 45.601 | 25.358 | O |
| ATOM | 8177 | H1 | HOH A | 2 | 56.803 | 46.059 | 25.047 | H |
| ATOM | 8178 | H2 | HOH A | 3 | 56.007 | 45.595 | 26.338 | H |
| ATOM | 8179 | O  | HOH A | 1 | 55.966 | 45.646 | 47.515 | O |
| ATOM | 8180 | H1 | HOH A | 2 | 56.772 | 46.103 | 47.198 | H |
| ATOM | 8181 | H2 | HOH A | 3 | 55.979 | 45.651 | 48.495 | H |
| ATOM | 8182 | O  | HOH A | 1 | 15.297 | 45.660 | 3.331  | O |
| ATOM | 8183 | H1 | HOH A | 2 | 15.303 | 44.736 | 3.007  | H |
| ATOM | 8184 | H2 | HOH A | 3 | 16.088 | 46.113 | 2.970  | H |
| ATOM | 8185 | O  | HOH A | 1 | 15.271 | 45.625 | 25.491 | O |
| ATOM | 8186 | H1 | HOH A | 2 | 15.277 | 44.704 | 25.158 | H |
| ATOM | 8187 | H2 | HOH A | 3 | 16.063 | 46.081 | 25.138 | H |
| ATOM | 8188 | O  | HOH A | 1 | 15.260 | 45.636 | 47.607 | O |
| ATOM | 8189 | H1 | HOH A | 2 | 15.272 | 44.712 | 47.279 | H |
| ATOM | 8190 | H2 | HOH A | 3 | 16.054 | 46.091 | 47.257 | H |
| ATOM | 8191 | O  | HOH A | 1 | 37.880 | 45.866 | 3.317  | O |
| ATOM | 8192 | H1 | HOH A | 2 | 37.877 | 44.942 | 2.988  | H |
| ATOM | 8193 | H2 | HOH A | 3 | 38.677 | 46.311 | 2.959  | H |
| ATOM | 8194 | O  | HOH A | 1 | 37.901 | 45.660 | 25.435 | O |
| ATOM | 8195 | H1 | HOH A | 2 | 37.909 | 44.738 | 25.101 | H |
| ATOM | 8196 | H2 | HOH A | 3 | 38.694 | 46.116 | 25.085 | H |
| ATOM | 8197 | O  | HOH A | 1 | 37.906 | 45.657 | 47.535 | O |
| ATOM | 8198 | H1 | HOH A | 2 | 37.913 | 44.733 | 47.209 | H |
| ATOM | 8199 | H2 | HOH A | 3 | 38.700 | 46.109 | 47.181 | H |
| ATOM | 8200 | O  | HOH A | 1 | 60.476 | 45.698 | 3.313  | O |
| ATOM | 8201 | H1 | HOH A | 2 | 60.484 | 44.775 | 2.984  | H |
| ATOM | 8202 | H2 | HOH A | 3 | 61.271 | 46.152 | 2.960  | H |
| ATOM | 8203 | O  | HOH A | 1 | 60.499 | 45.627 | 25.413 | O |
| ATOM | 8204 | H1 | HOH A | 2 | 60.498 | 44.705 | 25.081 | H |
| ATOM | 8205 | H2 | HOH A | 3 | 61.293 | 46.076 | 25.057 | H |
| ATOM | 8206 | O  | HOH A | 1 | 60.467 | 45.671 | 47.578 | O |
| ATOM | 8207 | H1 | HOH A | 2 | 60.479 | 44.749 | 47.245 | H |
| ATOM | 8208 | H2 | HOH A | 3 | 61.263 | 46.127 | 47.234 | H |
| ATOM | 8209 | O  | HOH A | 1 | 19.828 | 45.703 | 3.304  | O |
| ATOM | 8210 | H1 | HOH A | 2 | 19.815 | 44.784 | 2.964  | H |



|      |      |    |       |   |        |        |        |   |
|------|------|----|-------|---|--------|--------|--------|---|
| ATOM | 8211 | H2 | HOH A | 3 | 19.027 | 46.160 | 2.971  | H |
| ATOM | 8212 | O  | HOH A | 1 | 19.807 | 45.638 | 25.455 | O |
| ATOM | 8213 | H1 | HOH A | 2 | 19.795 | 44.720 | 25.113 | H |
| ATOM | 8214 | H2 | HOH A | 3 | 19.005 | 46.094 | 25.124 | H |
| ATOM | 8215 | O  | HOH A | 1 | 19.809 | 45.642 | 47.573 | O |
| ATOM | 8216 | H1 | HOH A | 2 | 19.786 | 44.722 | 47.236 | H |
| ATOM | 8217 | H2 | HOH A | 3 | 19.016 | 46.108 | 47.235 | H |
| ATOM | 8218 | O  | HOH A | 1 | 42.409 | 45.833 | 3.267  | O |
| ATOM | 8219 | H1 | HOH A | 2 | 42.389 | 44.915 | 2.925  | H |
| ATOM | 8220 | H2 | HOH A | 3 | 41.617 | 46.300 | 2.928  | H |
| ATOM | 8221 | O  | HOH A | 1 | 42.439 | 45.661 | 25.400 | O |
| ATOM | 8222 | H1 | HOH A | 2 | 42.418 | 44.745 | 25.053 | H |
| ATOM | 8223 | H2 | HOH A | 3 | 41.643 | 46.128 | 25.071 | H |
| ATOM | 8224 | O  | HOH A | 1 | 42.448 | 45.670 | 47.499 | O |
| ATOM | 8225 | H1 | HOH A | 2 | 42.428 | 44.749 | 47.163 | H |
| ATOM | 8226 | H2 | HOH A | 3 | 41.651 | 46.132 | 47.163 | H |
| ATOM | 8227 | O  | HOH A | 1 | 65.011 | 45.656 | 3.285  | O |
| ATOM | 8228 | H1 | HOH A | 2 | 64.989 | 44.739 | 2.941  | H |
| ATOM | 8229 | H2 | HOH A | 3 | 64.217 | 46.124 | 2.950  | H |
| ATOM | 8230 | O  | HOH A | 1 | 65.022 | 45.616 | 25.387 | O |
| ATOM | 8231 | H1 | HOH A | 2 | 65.005 | 44.698 | 25.044 | H |
| ATOM | 8232 | H2 | HOH A | 3 | 64.227 | 46.080 | 25.051 | H |
| ATOM | 8233 | O  | HOH A | 1 | 65.001 | 45.660 | 47.535 | O |
| ATOM | 8234 | H1 | HOH A | 2 | 64.977 | 44.741 | 47.197 | H |
| ATOM | 8235 | H2 | HOH A | 3 | 64.210 | 46.129 | 47.195 | H |
| ATOM | 8236 | O  | HOH A | 1 | 22.078 | 26.134 | 3.333  | O |
| ATOM | 8237 | H1 | HOH A | 2 | 22.064 | 25.216 | 2.991  | H |
| ATOM | 8238 | H2 | HOH A | 3 | 21.275 | 26.591 | 3.008  | H |
| ATOM | 8239 | O  | HOH A | 1 | 22.066 | 26.028 | 25.487 | O |
| ATOM | 8240 | H1 | HOH A | 2 | 22.060 | 25.110 | 25.145 | H |
| ATOM | 8241 | H2 | HOH A | 3 | 21.261 | 26.479 | 25.156 | H |
| ATOM | 8242 | O  | HOH A | 1 | 22.059 | 26.044 | 47.574 | O |
| ATOM | 8243 | H1 | HOH A | 2 | 22.042 | 25.123 | 47.240 | H |
| ATOM | 8244 | H2 | HOH A | 3 | 21.254 | 26.499 | 47.249 | H |
| ATOM | 8245 | O  | HOH A | 1 | 44.658 | 26.225 | 3.265  | O |
| ATOM | 8246 | H1 | HOH A | 2 | 44.650 | 25.308 | 2.921  | H |

|      |      |    |       |   |        |        |        |   |
|------|------|----|-------|---|--------|--------|--------|---|
| ATOM | 8247 | H2 | HOH A | 3 | 43.850 | 26.676 | 2.942  | H |
| ATOM | 8248 | O  | HOH A | 1 | 44.698 | 26.058 | 25.414 | O |
| ATOM | 8249 | H1 | HOH A | 2 | 44.685 | 25.141 | 25.067 | H |
| ATOM | 8250 | H2 | HOH A | 3 | 43.892 | 26.514 | 25.092 | H |
| ATOM | 8251 | O  | HOH A | 1 | 44.691 | 26.064 | 47.538 | O |
| ATOM | 8252 | H1 | HOH A | 2 | 44.677 | 25.144 | 47.201 | H |
| ATOM | 8253 | H2 | HOH A | 3 | 43.887 | 26.518 | 47.211 | H |
| ATOM | 8254 | O  | HOH A | 1 | 67.269 | 26.032 | 3.312  | O |
| ATOM | 8255 | H1 | HOH A | 2 | 67.252 | 25.116 | 2.964  | H |
| ATOM | 8256 | H2 | HOH A | 3 | 66.468 | 26.494 | 2.987  | H |
| ATOM | 8257 | O  | HOH A | 1 | 67.264 | 26.008 | 25.425 | O |
| ATOM | 8258 | H1 | HOH A | 2 | 67.254 | 25.087 | 25.090 | H |
| ATOM | 8259 | H2 | HOH A | 3 | 66.461 | 26.460 | 25.091 | H |
| ATOM | 8260 | O  | HOH A | 1 | 67.240 | 26.058 | 47.582 | O |
| ATOM | 8261 | H1 | HOH A | 2 | 67.225 | 25.141 | 47.237 | H |
| ATOM | 8262 | H2 | HOH A | 3 | 66.444 | 26.520 | 47.248 | H |
| ATOM | 8263 | O  | HOH A | 1 | 3.993  | 26.014 | 3.296  | O |
| ATOM | 8264 | H1 | HOH A | 2 | 3.203  | 26.485 | 2.960  | H |
| ATOM | 8265 | H2 | HOH A | 3 | 4.788  | 26.486 | 2.972  | H |
| ATOM | 8266 | O  | HOH A | 1 | 3.973  | 26.016 | 25.426 | O |
| ATOM | 8267 | H1 | HOH A | 2 | 3.180  | 26.480 | 25.084 | H |
| ATOM | 8268 | H2 | HOH A | 3 | 4.765  | 26.493 | 25.102 | H |
| ATOM | 8269 | O  | HOH A | 1 | 3.952  | 26.044 | 47.575 | O |
| ATOM | 8270 | H1 | HOH A | 2 | 3.159  | 26.510 | 47.238 | H |
| ATOM | 8271 | H2 | HOH A | 3 | 4.745  | 26.521 | 47.251 | H |
| ATOM | 8272 | O  | HOH A | 1 | 26.596 | 26.174 | 3.301  | O |
| ATOM | 8273 | H1 | HOH A | 2 | 25.797 | 26.632 | 2.967  | H |
| ATOM | 8274 | H2 | HOH A | 3 | 27.382 | 26.663 | 2.979  | H |
| ATOM | 8275 | O  | HOH A | 1 | 26.581 | 26.057 | 25.466 | O |
| ATOM | 8276 | H1 | HOH A | 2 | 25.785 | 26.519 | 25.130 | H |
| ATOM | 8277 | H2 | HOH A | 3 | 27.370 | 26.536 | 25.138 | H |
| ATOM | 8278 | O  | HOH A | 1 | 26.570 | 26.048 | 47.553 | O |
| ATOM | 8279 | H1 | HOH A | 2 | 25.773 | 26.512 | 47.223 | H |
| ATOM | 8280 | H2 | HOH A | 3 | 27.358 | 26.531 | 47.227 | H |
| ATOM | 8281 | O  | HOH A | 1 | 49.167 | 26.205 | 3.257  | O |
| ATOM | 8282 | H1 | HOH A | 2 | 48.376 | 26.679 | 2.927  | H |

|      |      |    |       |   |        |        |        |   |
|------|------|----|-------|---|--------|--------|--------|---|
| ATOM | 8283 | H2 | HOH A | 3 | 49.962 | 26.678 | 2.932  | H |
| ATOM | 8284 | O  | HOH A | 1 | 49.195 | 26.053 | 25.379 | O |
| ATOM | 8285 | H1 | HOH A | 2 | 48.405 | 26.527 | 25.044 | H |
| ATOM | 8286 | H2 | HOH A | 3 | 49.991 | 26.522 | 25.054 | H |
| ATOM | 8287 | O  | HOH A | 1 | 49.204 | 26.077 | 47.512 | O |
| ATOM | 8288 | H1 | HOH A | 2 | 48.408 | 26.541 | 47.180 | H |
| ATOM | 8289 | H2 | HOH A | 3 | 49.994 | 26.554 | 47.181 | H |
| ATOM | 8290 | O  | HOH A | 1 | 8.522  | 26.029 | 3.361  | O |
| ATOM | 8291 | H1 | HOH A | 2 | 8.529  | 25.106 | 3.031  | H |
| ATOM | 8292 | H2 | HOH A | 3 | 9.318  | 26.481 | 3.012  | H |
| ATOM | 8293 | O  | HOH A | 1 | 8.492  | 26.009 | 25.496 | O |
| ATOM | 8294 | H1 | HOH A | 2 | 8.504  | 25.086 | 25.167 | H |
| ATOM | 8295 | H2 | HOH A | 3 | 9.291  | 26.463 | 25.154 | H |
| ATOM | 8296 | O  | HOH A | 1 | 8.481  | 26.054 | 47.643 | O |
| ATOM | 8297 | H1 | HOH A | 2 | 8.480  | 25.128 | 47.323 | H |
| ATOM | 8298 | H2 | HOH A | 3 | 9.283  | 26.495 | 47.293 | H |
| ATOM | 8299 | O  | HOH A | 1 | 31.105 | 26.229 | 3.355  | O |
| ATOM | 8300 | H1 | HOH A | 2 | 31.113 | 25.309 | 3.018  | H |
| ATOM | 8301 | H2 | HOH A | 3 | 31.900 | 26.685 | 3.007  | H |
| ATOM | 8302 | O  | HOH A | 1 | 31.123 | 26.066 | 25.511 | O |
| ATOM | 8303 | H1 | HOH A | 2 | 31.124 | 25.145 | 25.175 | H |
| ATOM | 8304 | H2 | HOH A | 3 | 31.925 | 26.513 | 25.171 | H |
| ATOM | 8305 | O  | HOH A | 1 | 31.112 | 26.056 | 47.602 | O |
| ATOM | 8306 | H1 | HOH A | 2 | 31.114 | 25.133 | 47.274 | H |
| ATOM | 8307 | H2 | HOH A | 3 | 31.910 | 26.504 | 47.252 | H |
| ATOM | 8308 | O  | HOH A | 1 | 53.684 | 26.157 | 3.316  | O |
| ATOM | 8309 | H1 | HOH A | 2 | 53.689 | 25.237 | 2.978  | H |
| ATOM | 8310 | H2 | HOH A | 3 | 54.483 | 26.609 | 2.975  | H |
| ATOM | 8311 | O  | HOH A | 1 | 53.730 | 26.041 | 25.422 | O |
| ATOM | 8312 | H1 | HOH A | 2 | 53.730 | 25.121 | 25.085 | H |
| ATOM | 8313 | H2 | HOH A | 3 | 54.531 | 26.489 | 25.079 | H |
| ATOM | 8314 | O  | HOH A | 1 | 53.717 | 26.088 | 47.578 | O |
| ATOM | 8315 | H1 | HOH A | 2 | 53.722 | 25.167 | 47.243 | H |
| ATOM | 8316 | H2 | HOH A | 3 | 54.518 | 26.538 | 47.238 | H |
| ATOM | 8317 | O  | HOH A | 1 | 13.054 | 26.063 | 3.288  | O |
| ATOM | 8318 | H1 | HOH A | 2 | 13.046 | 25.134 | 2.975  | H |

|      |      |    |       |   |        |        |        |   |
|------|------|----|-------|---|--------|--------|--------|---|
| ATOM | 8319 | H2 | HOH A | 3 | 13.056 | 26.053 | 4.268  | H |
| ATOM | 8320 | O  | HOH A | 1 | 13.028 | 26.032 | 25.444 | O |
| ATOM | 8321 | H1 | HOH A | 2 | 13.019 | 25.101 | 25.136 | H |
| ATOM | 8322 | H2 | HOH A | 3 | 13.027 | 26.026 | 26.424 | H |
| ATOM | 8323 | O  | HOH A | 1 | 13.009 | 26.055 | 47.560 | O |
| ATOM | 8324 | H1 | HOH A | 2 | 13.012 | 25.123 | 47.257 | H |
| ATOM | 8325 | H2 | HOH A | 3 | 13.002 | 26.055 | 48.540 | H |
| ATOM | 8326 | O  | HOH A | 1 | 35.629 | 26.276 | 3.272  | O |
| ATOM | 8327 | H1 | HOH A | 2 | 35.629 | 25.347 | 2.960  | H |
| ATOM | 8328 | H2 | HOH A | 3 | 35.625 | 26.266 | 4.252  | H |
| ATOM | 8329 | O  | HOH A | 1 | 35.652 | 26.085 | 25.413 | O |
| ATOM | 8330 | H1 | HOH A | 2 | 35.643 | 25.157 | 25.100 | H |
| ATOM | 8331 | H2 | HOH A | 3 | 35.648 | 26.074 | 26.393 | H |
| ATOM | 8332 | O  | HOH A | 1 | 35.663 | 26.072 | 47.496 | O |
| ATOM | 8333 | H1 | HOH A | 2 | 35.653 | 25.141 | 47.190 | H |
| ATOM | 8334 | H2 | HOH A | 3 | 35.654 | 26.069 | 48.476 | H |
| ATOM | 8335 | O  | HOH A | 1 | 58.221 | 26.127 | 3.235  | O |
| ATOM | 8336 | H1 | HOH A | 2 | 58.215 | 25.198 | 2.920  | H |
| ATOM | 8337 | H2 | HOH A | 3 | 58.223 | 26.114 | 4.215  | H |
| ATOM | 8338 | O  | HOH A | 1 | 58.250 | 26.048 | 25.362 | O |
| ATOM | 8339 | H1 | HOH A | 2 | 58.249 | 25.118 | 25.053 | H |
| ATOM | 8340 | H2 | HOH A | 3 | 58.249 | 26.042 | 26.342 | H |
| ATOM | 8341 | O  | HOH A | 1 | 58.239 | 26.093 | 47.518 | O |
| ATOM | 8342 | H1 | HOH A | 2 | 58.242 | 25.164 | 47.207 | H |
| ATOM | 8343 | H2 | HOH A | 3 | 58.230 | 26.085 | 48.498 | H |
| ATOM | 8344 | O  | HOH A | 1 | 17.570 | 26.076 | 3.330  | O |
| ATOM | 8345 | H1 | HOH A | 2 | 16.771 | 26.537 | 2.999  | H |
| ATOM | 8346 | H2 | HOH A | 3 | 17.538 | 26.080 | 4.310  | H |
| ATOM | 8347 | O  | HOH A | 1 | 17.550 | 26.013 | 25.500 | O |
| ATOM | 8348 | H1 | HOH A | 2 | 16.753 | 26.471 | 25.160 | H |
| ATOM | 8349 | H2 | HOH A | 3 | 17.516 | 26.031 | 26.479 | H |
| ATOM | 8350 | O  | HOH A | 1 | 17.538 | 26.039 | 47.595 | O |
| ATOM | 8351 | H1 | HOH A | 2 | 16.740 | 26.495 | 47.256 | H |
| ATOM | 8352 | H2 | HOH A | 3 | 17.505 | 26.059 | 48.574 | H |
| ATOM | 8353 | O  | HOH A | 1 | 40.145 | 26.239 | 3.303  | O |
| ATOM | 8354 | H1 | HOH A | 2 | 39.345 | 26.698 | 2.970  | H |

|      |      |    |       |   |        |        |        |   |
|------|------|----|-------|---|--------|--------|--------|---|
| ATOM | 8355 | H2 | HOH A | 3 | 40.114 | 26.248 | 4.282  | H |
| ATOM | 8356 | O  | HOH A | 1 | 40.186 | 26.057 | 25.433 | O |
| ATOM | 8357 | H1 | HOH A | 2 | 39.385 | 26.518 | 25.107 | H |
| ATOM | 8358 | H2 | HOH A | 3 | 40.157 | 26.056 | 26.413 | H |
| ATOM | 8359 | O  | HOH A | 1 | 40.182 | 26.054 | 47.531 | O |
| ATOM | 8360 | H1 | HOH A | 2 | 39.386 | 26.514 | 47.194 | H |
| ATOM | 8361 | H2 | HOH A | 3 | 40.152 | 26.074 | 48.511 | H |
| ATOM | 8362 | O  | HOH A | 1 | 62.749 | 26.062 | 3.308  | O |
| ATOM | 8363 | H1 | HOH A | 2 | 61.956 | 26.532 | 2.975  | H |
| ATOM | 8364 | H2 | HOH A | 3 | 62.713 | 26.064 | 4.287  | H |
| ATOM | 8365 | O  | HOH A | 1 | 62.758 | 26.007 | 25.424 | O |
| ATOM | 8366 | H1 | HOH A | 2 | 61.963 | 26.471 | 25.089 | H |
| ATOM | 8367 | H2 | HOH A | 3 | 62.722 | 26.013 | 26.404 | H |
| ATOM | 8368 | O  | HOH A | 1 | 62.764 | 26.060 | 47.571 | O |
| ATOM | 8369 | H1 | HOH A | 2 | 61.966 | 26.522 | 47.238 | H |
| ATOM | 8370 | H2 | HOH A | 3 | 62.733 | 26.070 | 48.550 | H |
| ATOM | 8371 | O  | HOH A | 1 | 1.800  | 29.937 | 3.319  | O |
| ATOM | 8372 | H1 | HOH A | 2 | 0.998  | 30.406 | 3.009  | H |
| ATOM | 8373 | H2 | HOH A | 3 | 1.789  | 29.932 | 4.299  | H |
| ATOM | 8374 | O  | HOH A | 1 | 1.790  | 29.922 | 25.449 | O |
| ATOM | 8375 | H1 | HOH A | 2 | 0.992  | 30.388 | 25.123 | H |
| ATOM | 8376 | H2 | HOH A | 3 | 1.763  | 29.923 | 26.428 | H |
| ATOM | 8377 | O  | HOH A | 1 | 1.767  | 29.963 | 47.589 | O |
| ATOM | 8378 | H1 | HOH A | 2 | 0.973  | 30.434 | 47.260 | H |
| ATOM | 8379 | H2 | HOH A | 3 | 1.740  | 29.973 | 48.569 | H |
| ATOM | 8380 | O  | HOH A | 1 | 24.399 | 30.065 | 3.339  | O |
| ATOM | 8381 | H1 | HOH A | 2 | 23.592 | 30.522 | 3.021  | H |
| ATOM | 8382 | H2 | HOH A | 3 | 24.380 | 30.066 | 4.319  | H |
| ATOM | 8383 | O  | HOH A | 1 | 24.400 | 29.957 | 25.487 | O |
| ATOM | 8384 | H1 | HOH A | 2 | 23.602 | 30.428 | 25.168 | H |
| ATOM | 8385 | H2 | HOH A | 3 | 24.382 | 29.959 | 26.466 | H |
| ATOM | 8386 | O  | HOH A | 1 | 24.389 | 29.959 | 47.587 | O |
| ATOM | 8387 | H1 | HOH A | 2 | 23.588 | 30.424 | 47.269 | H |
| ATOM | 8388 | H2 | HOH A | 3 | 24.376 | 29.968 | 48.567 | H |
| ATOM | 8389 | O  | HOH A | 1 | 46.970 | 30.128 | 3.278  | O |
| ATOM | 8390 | H1 | HOH A | 2 | 46.171 | 30.598 | 2.959  | H |

|      |      |    |       |   |        |        |        |   |
|------|------|----|-------|---|--------|--------|--------|---|
| ATOM | 8391 | H2 | HOH A | 3 | 46.950 | 30.130 | 4.258  | H |
| ATOM | 8392 | O  | HOH A | 1 | 47.019 | 29.962 | 25.394 | O |
| ATOM | 8393 | H1 | HOH A | 2 | 46.218 | 30.432 | 25.083 | H |
| ATOM | 8394 | H2 | HOH A | 3 | 47.008 | 29.959 | 26.374 | H |
| ATOM | 8395 | O  | HOH A | 1 | 47.022 | 29.982 | 47.537 | O |
| ATOM | 8396 | H1 | HOH A | 2 | 46.227 | 30.451 | 47.208 | H |
| ATOM | 8397 | H2 | HOH A | 3 | 47.002 | 30.001 | 48.516 | H |
| ATOM | 8398 | O  | HOH A | 1 | 6.309  | 29.926 | 3.321  | O |
| ATOM | 8399 | H1 | HOH A | 2 | 6.296  | 29.006 | 2.985  | H |
| ATOM | 8400 | H2 | HOH A | 3 | 5.500  | 30.377 | 3.002  | H |
| ATOM | 8401 | O  | HOH A | 1 | 6.295  | 29.906 | 25.448 | O |
| ATOM | 8402 | H1 | HOH A | 2 | 6.283  | 28.987 | 25.107 | H |
| ATOM | 8403 | H2 | HOH A | 3 | 5.493  | 30.362 | 25.118 | H |
| ATOM | 8404 | O  | HOH A | 1 | 6.265  | 29.958 | 47.605 | O |
| ATOM | 8405 | H1 | HOH A | 2 | 6.251  | 29.037 | 47.271 | H |
| ATOM | 8406 | H2 | HOH A | 3 | 5.463  | 30.413 | 47.274 | H |
| ATOM | 8407 | O  | HOH A | 1 | 28.894 | 30.119 | 3.326  | O |
| ATOM | 8408 | H1 | HOH A | 2 | 28.879 | 29.202 | 2.981  | H |
| ATOM | 8409 | H2 | HOH A | 3 | 28.088 | 30.576 | 3.006  | H |
| ATOM | 8410 | O  | HOH A | 1 | 28.913 | 29.962 | 25.486 | O |
| ATOM | 8411 | H1 | HOH A | 2 | 28.898 | 29.041 | 25.150 | H |
| ATOM | 8412 | H2 | HOH A | 3 | 28.107 | 30.415 | 25.160 | H |
| ATOM | 8413 | O  | HOH A | 1 | 28.898 | 29.970 | 47.573 | O |
| ATOM | 8414 | H1 | HOH A | 2 | 28.884 | 29.050 | 47.235 | H |
| ATOM | 8415 | H2 | HOH A | 3 | 28.094 | 30.425 | 47.246 | H |
| ATOM | 8416 | O  | HOH A | 1 | 51.485 | 30.099 | 3.268  | O |
| ATOM | 8417 | H1 | HOH A | 2 | 51.467 | 29.181 | 2.924  | H |
| ATOM | 8418 | H2 | HOH A | 3 | 50.681 | 30.558 | 2.947  | H |
| ATOM | 8419 | O  | HOH A | 1 | 51.511 | 29.950 | 25.378 | O |
| ATOM | 8420 | H1 | HOH A | 2 | 51.498 | 29.029 | 25.043 | H |
| ATOM | 8421 | H2 | HOH A | 3 | 50.703 | 30.401 | 25.055 | H |
| ATOM | 8422 | O  | HOH A | 1 | 51.510 | 29.993 | 47.536 | O |
| ATOM | 8423 | H1 | HOH A | 2 | 51.497 | 29.071 | 47.205 | H |
| ATOM | 8424 | H2 | HOH A | 3 | 50.708 | 30.446 | 47.202 | H |
| ATOM | 8425 | O  | HOH A | 1 | 10.822 | 29.935 | 3.299  | O |
| ATOM | 8426 | H1 | HOH A | 2 | 10.025 | 30.407 | 2.980  | H |

|      |      |    |       |   |        |        |        |   |
|------|------|----|-------|---|--------|--------|--------|---|
| ATOM | 8427 | H2 | HOH A | 3 | 11.610 | 30.407 | 2.958  | H |
| ATOM | 8428 | O  | HOH A | 1 | 10.786 | 29.912 | 25.452 | O |
| ATOM | 8429 | H1 | HOH A | 2 | 9.994  | 30.390 | 25.128 | H |
| ATOM | 8430 | H2 | HOH A | 3 | 11.580 | 30.378 | 25.116 | H |
| ATOM | 8431 | O  | HOH A | 1 | 10.772 | 29.927 | 47.581 | O |
| ATOM | 8432 | H1 | HOH A | 2 | 9.979  | 30.404 | 47.257 | H |
| ATOM | 8433 | H2 | HOH A | 3 | 11.565 | 30.394 | 47.244 | H |
| ATOM | 8434 | O  | HOH A | 1 | 33.389 | 30.142 | 3.296  | O |
| ATOM | 8435 | H1 | HOH A | 2 | 32.594 | 30.620 | 2.977  | H |
| ATOM | 8436 | H2 | HOH A | 3 | 34.180 | 30.611 | 2.957  | H |
| ATOM | 8437 | O  | HOH A | 1 | 33.417 | 29.963 | 25.435 | O |
| ATOM | 8438 | H1 | HOH A | 2 | 32.621 | 30.442 | 25.123 | H |
| ATOM | 8439 | H2 | HOH A | 3 | 34.207 | 30.436 | 25.099 | H |
| ATOM | 8440 | O  | HOH A | 1 | 33.412 | 29.950 | 47.530 | O |
| ATOM | 8441 | H1 | HOH A | 2 | 32.620 | 30.427 | 47.204 | H |
| ATOM | 8442 | H2 | HOH A | 3 | 34.206 | 30.419 | 47.197 | H |
| ATOM | 8443 | O  | HOH A | 1 | 55.986 | 30.035 | 3.245  | O |
| ATOM | 8444 | H1 | HOH A | 2 | 55.195 | 30.518 | 2.926  | H |
| ATOM | 8445 | H2 | HOH A | 3 | 56.781 | 30.499 | 2.907  | H |
| ATOM | 8446 | O  | HOH A | 1 | 56.013 | 29.932 | 25.362 | O |
| ATOM | 8447 | H1 | HOH A | 2 | 55.219 | 30.409 | 25.040 | H |
| ATOM | 8448 | H2 | HOH A | 3 | 56.805 | 30.403 | 25.029 | H |
| ATOM | 8449 | O  | HOH A | 1 | 56.014 | 29.985 | 47.518 | O |
| ATOM | 8450 | H1 | HOH A | 2 | 55.217 | 30.460 | 47.202 | H |
| ATOM | 8451 | H2 | HOH A | 3 | 56.803 | 30.460 | 47.184 | H |
| ATOM | 8452 | O  | HOH A | 1 | 15.359 | 29.963 | 3.275  | O |
| ATOM | 8453 | H1 | HOH A | 2 | 16.161 | 30.442 | 2.978  | H |
| ATOM | 8454 | H2 | HOH A | 3 | 15.354 | 29.959 | 4.255  | H |
| ATOM | 8455 | O  | HOH A | 1 | 15.317 | 29.912 | 25.448 | O |
| ATOM | 8456 | H1 | HOH A | 2 | 16.125 | 30.380 | 25.148 | H |
| ATOM | 8457 | H2 | HOH A | 3 | 15.310 | 29.920 | 26.428 | H |
| ATOM | 8458 | O  | HOH A | 1 | 15.313 | 29.936 | 47.554 | O |
| ATOM | 8459 | H1 | HOH A | 2 | 16.118 | 30.408 | 47.253 | H |
| ATOM | 8460 | H2 | HOH A | 3 | 15.307 | 29.944 | 48.534 | H |
| ATOM | 8461 | O  | HOH A | 1 | 37.917 | 30.149 | 3.252  | O |
| ATOM | 8462 | H1 | HOH A | 2 | 38.716 | 30.627 | 2.943  | H |

|      |      |    |       |   |        |        |        |   |
|------|------|----|-------|---|--------|--------|--------|---|
| ATOM | 8463 | H2 | HOH A | 3 | 37.925 | 30.148 | 4.232  | H |
| ATOM | 8464 | O  | HOH A | 1 | 37.957 | 29.975 | 25.377 | O |
| ATOM | 8465 | H1 | HOH A | 2 | 38.761 | 30.445 | 25.071 | H |
| ATOM | 8466 | H2 | HOH A | 3 | 37.961 | 29.975 | 26.357 | H |
| ATOM | 8467 | O  | HOH A | 1 | 37.965 | 29.959 | 47.478 | O |
| ATOM | 8468 | H1 | HOH A | 2 | 38.769 | 30.426 | 47.169 | H |
| ATOM | 8469 | H2 | HOH A | 3 | 37.958 | 29.983 | 48.457 | H |
| ATOM | 8470 | O  | HOH A | 1 | 60.529 | 29.989 | 3.241  | O |
| ATOM | 8471 | H1 | HOH A | 2 | 61.336 | 30.453 | 2.934  | H |
| ATOM | 8472 | H2 | HOH A | 3 | 60.526 | 30.000 | 4.221  | H |
| ATOM | 8473 | O  | HOH A | 1 | 60.539 | 29.920 | 25.352 | O |
| ATOM | 8474 | H1 | HOH A | 2 | 61.347 | 30.385 | 25.049 | H |
| ATOM | 8475 | H2 | HOH A | 3 | 60.530 | 29.938 | 26.332 | H |
| ATOM | 8476 | O  | HOH A | 1 | 60.538 | 29.981 | 47.524 | O |
| ATOM | 8477 | H1 | HOH A | 2 | 61.344 | 30.449 | 47.222 | H |
| ATOM | 8478 | H2 | HOH A | 3 | 60.530 | 29.992 | 48.504 | H |
| ATOM | 8479 | O  | HOH A | 1 | 19.909 | 30.035 | 3.284  | O |
| ATOM | 8480 | H1 | HOH A | 2 | 19.107 | 30.496 | 2.959  | H |
| ATOM | 8481 | H2 | HOH A | 3 | 19.887 | 30.044 | 4.264  | H |
| ATOM | 8482 | O  | HOH A | 1 | 19.893 | 29.940 | 25.449 | O |
| ATOM | 8483 | H1 | HOH A | 2 | 19.090 | 30.399 | 25.127 | H |
| ATOM | 8484 | H2 | HOH A | 3 | 19.875 | 29.949 | 26.429 | H |
| ATOM | 8485 | O  | HOH A | 1 | 19.885 | 29.964 | 47.544 | O |
| ATOM | 8486 | H1 | HOH A | 2 | 19.090 | 30.437 | 47.221 | H |
| ATOM | 8487 | H2 | HOH A | 3 | 19.867 | 29.976 | 48.524 | H |
| ATOM | 8488 | O  | HOH A | 1 | 42.484 | 30.151 | 3.237  | O |
| ATOM | 8489 | H1 | HOH A | 2 | 41.680 | 30.614 | 2.922  | H |
| ATOM | 8490 | H2 | HOH A | 3 | 42.475 | 30.163 | 4.217  | H |
| ATOM | 8491 | O  | HOH A | 1 | 42.535 | 29.980 | 25.362 | O |
| ATOM | 8492 | H1 | HOH A | 2 | 41.735 | 30.449 | 25.045 | H |
| ATOM | 8493 | H2 | HOH A | 3 | 42.520 | 29.981 | 26.341 | H |
| ATOM | 8494 | O  | HOH A | 1 | 42.537 | 29.977 | 47.487 | O |
| ATOM | 8495 | H1 | HOH A | 2 | 41.736 | 30.434 | 47.154 | H |
| ATOM | 8496 | H2 | HOH A | 3 | 42.518 | 30.007 | 48.466 | H |
| ATOM | 8497 | O  | HOH A | 1 | 65.090 | 29.968 | 3.264  | O |
| ATOM | 8498 | H1 | HOH A | 2 | 64.294 | 30.440 | 2.940  | H |



|      |      |    |       |   |        |        |        |   |
|------|------|----|-------|---|--------|--------|--------|---|
| ATOM | 8499 | H2 | HOH A | 3 | 65.068 | 29.974 | 4.244  | H |
| ATOM | 8500 | O  | HOH A | 1 | 65.102 | 29.926 | 25.370 | O |
| ATOM | 8501 | H1 | HOH A | 2 | 64.303 | 30.387 | 25.040 | H |
| ATOM | 8502 | H2 | HOH A | 3 | 65.079 | 29.943 | 26.350 | H |
| ATOM | 8503 | O  | HOH A | 1 | 65.088 | 29.989 | 47.539 | O |
| ATOM | 8504 | H1 | HOH A | 2 | 64.287 | 30.451 | 47.213 | H |
| ATOM | 8505 | H2 | HOH A | 3 | 65.070 | 30.007 | 48.519 | H |
| ATOM | 8506 | O  | HOH A | 1 | 22.127 | 33.965 | 3.301  | O |
| ATOM | 8507 | H1 | HOH A | 2 | 22.915 | 34.461 | 2.994  | H |
| ATOM | 8508 | H2 | HOH A | 3 | 22.124 | 33.977 | 4.281  | H |
| ATOM | 8509 | O  | HOH A | 1 | 22.110 | 33.869 | 25.457 | O |
| ATOM | 8510 | H1 | HOH A | 2 | 22.902 | 34.353 | 25.144 | H |
| ATOM | 8511 | H2 | HOH A | 3 | 22.119 | 33.873 | 26.436 | H |
| ATOM | 8512 | O  | HOH A | 1 | 22.092 | 33.880 | 47.545 | O |
| ATOM | 8513 | H1 | HOH A | 2 | 22.882 | 34.365 | 47.226 | H |
| ATOM | 8514 | H2 | HOH A | 3 | 22.103 | 33.895 | 48.525 | H |
| ATOM | 8515 | O  | HOH A | 1 | 44.694 | 34.065 | 3.238  | O |
| ATOM | 8516 | H1 | HOH A | 2 | 45.490 | 34.541 | 2.921  | H |
| ATOM | 8517 | H2 | HOH A | 3 | 44.701 | 34.083 | 4.218  | H |
| ATOM | 8518 | O  | HOH A | 1 | 44.744 | 33.895 | 25.361 | O |
| ATOM | 8519 | H1 | HOH A | 2 | 45.533 | 34.381 | 25.044 | H |
| ATOM | 8520 | H2 | HOH A | 3 | 44.753 | 33.908 | 26.341 | H |
| ATOM | 8521 | O  | HOH A | 1 | 44.728 | 33.909 | 47.490 | O |
| ATOM | 8522 | H1 | HOH A | 2 | 45.513 | 34.400 | 47.170 | H |
| ATOM | 8523 | H2 | HOH A | 3 | 44.733 | 33.934 | 48.470 | H |
| ATOM | 8524 | O  | HOH A | 1 | 67.309 | 33.864 | 3.274  | O |
| ATOM | 8525 | H1 | HOH A | 2 | 68.102 | 34.342 | 2.954  | H |
| ATOM | 8526 | H2 | HOH A | 3 | 67.324 | 33.874 | 4.253  | H |
| ATOM | 8527 | O  | HOH A | 1 | 67.313 | 33.845 | 25.389 | O |
| ATOM | 8528 | H1 | HOH A | 2 | 68.106 | 34.327 | 25.074 | H |
| ATOM | 8529 | H2 | HOH A | 3 | 67.318 | 33.862 | 26.369 | H |
| ATOM | 8530 | O  | HOH A | 1 | 67.295 | 33.884 | 47.547 | O |
| ATOM | 8531 | H1 | HOH A | 2 | 68.089 | 34.364 | 47.229 | H |
| ATOM | 8532 | H2 | HOH A | 3 | 67.301 | 33.905 | 48.527 | H |
| ATOM | 8533 | O  | HOH A | 1 | 4.001  | 33.859 | 3.331  | O |
| ATOM | 8534 | H1 | HOH A | 2 | 4.002  | 32.940 | 2.994  | H |

|      |      |    |       |   |        |        |        |   |
|------|------|----|-------|---|--------|--------|--------|---|
| ATOM | 8535 | H2 | HOH A | 3 | 4.812  | 34.302 | 3.007  | H |
| ATOM | 8536 | O  | HOH A | 1 | 3.996  | 33.857 | 25.446 | O |
| ATOM | 8537 | H1 | HOH A | 2 | 3.998  | 32.938 | 25.106 | H |
| ATOM | 8538 | H2 | HOH A | 3 | 4.805  | 34.302 | 25.119 | H |
| ATOM | 8539 | O  | HOH A | 1 | 3.972  | 33.893 | 47.579 | O |
| ATOM | 8540 | H1 | HOH A | 2 | 3.974  | 32.972 | 47.243 | H |
| ATOM | 8541 | H2 | HOH A | 3 | 4.787  | 34.333 | 47.261 | H |
| ATOM | 8542 | O  | HOH A | 1 | 26.601 | 34.046 | 3.329  | O |
| ATOM | 8543 | H1 | HOH A | 2 | 26.600 | 33.126 | 2.992  | H |
| ATOM | 8544 | H2 | HOH A | 3 | 27.412 | 34.488 | 3.001  | H |
| ATOM | 8545 | O  | HOH A | 1 | 26.605 | 33.895 | 25.495 | O |
| ATOM | 8546 | H1 | HOH A | 2 | 26.610 | 32.976 | 25.156 | H |
| ATOM | 8547 | H2 | HOH A | 3 | 27.417 | 34.341 | 25.175 | H |
| ATOM | 8548 | O  | HOH A | 1 | 26.593 | 33.901 | 47.558 | O |
| ATOM | 8549 | H1 | HOH A | 2 | 26.597 | 32.979 | 47.226 | H |
| ATOM | 8550 | H2 | HOH A | 3 | 27.403 | 34.345 | 47.232 | H |
| ATOM | 8551 | O  | HOH A | 1 | 49.189 | 34.052 | 3.260  | O |
| ATOM | 8552 | H1 | HOH A | 2 | 49.190 | 33.130 | 2.928  | H |
| ATOM | 8553 | H2 | HOH A | 3 | 50.003 | 34.491 | 2.936  | H |
| ATOM | 8554 | O  | HOH A | 1 | 49.213 | 33.900 | 25.375 | O |
| ATOM | 8555 | H1 | HOH A | 2 | 49.211 | 32.981 | 25.037 | H |
| ATOM | 8556 | H2 | HOH A | 3 | 50.025 | 34.342 | 25.049 | H |
| ATOM | 8557 | O  | HOH A | 1 | 49.210 | 33.927 | 47.529 | O |
| ATOM | 8558 | H1 | HOH A | 2 | 49.219 | 33.005 | 47.197 | H |
| ATOM | 8559 | H2 | HOH A | 3 | 50.021 | 34.373 | 47.206 | H |
| ATOM | 8560 | O  | HOH A | 1 | 8.546  | 33.860 | 3.306  | O |
| ATOM | 8561 | H1 | HOH A | 2 | 8.565  | 32.936 | 2.982  | H |
| ATOM | 8562 | H2 | HOH A | 3 | 9.343  | 34.318 | 2.964  | H |
| ATOM | 8563 | O  | HOH A | 1 | 8.506  | 33.848 | 25.446 | O |
| ATOM | 8564 | H1 | HOH A | 2 | 8.514  | 32.925 | 25.116 | H |
| ATOM | 8565 | H2 | HOH A | 3 | 9.312  | 34.295 | 25.113 | H |
| ATOM | 8566 | O  | HOH A | 1 | 8.506  | 33.886 | 47.578 | O |
| ATOM | 8567 | H1 | HOH A | 2 | 8.507  | 32.960 | 47.255 | H |
| ATOM | 8568 | H2 | HOH A | 3 | 9.312  | 34.326 | 47.235 | H |
| ATOM | 8569 | O  | HOH A | 1 | 31.112 | 34.068 | 3.306  | O |
| ATOM | 8570 | H1 | HOH A | 2 | 31.111 | 33.145 | 2.977  | H |

|      |      |    |       |   |        |        |        |   |
|------|------|----|-------|---|--------|--------|--------|---|
| ATOM | 8571 | H2 | HOH A | 3 | 31.913 | 34.513 | 2.959  | H |
| ATOM | 8572 | O  | HOH A | 1 | 31.144 | 33.905 | 25.448 | O |
| ATOM | 8573 | H1 | HOH A | 2 | 31.150 | 32.982 | 25.119 | H |
| ATOM | 8574 | H2 | HOH A | 3 | 31.946 | 34.354 | 25.107 | H |
| ATOM | 8575 | O  | HOH A | 1 | 31.146 | 33.895 | 47.530 | O |
| ATOM | 8576 | H1 | HOH A | 2 | 31.155 | 32.969 | 47.209 | H |
| ATOM | 8577 | H2 | HOH A | 3 | 31.949 | 34.341 | 47.189 | H |
| ATOM | 8578 | O  | HOH A | 1 | 53.721 | 34.012 | 3.244  | O |
| ATOM | 8579 | H1 | HOH A | 2 | 53.720 | 33.087 | 2.919  | H |
| ATOM | 8580 | H2 | HOH A | 3 | 54.528 | 34.451 | 2.902  | H |
| ATOM | 8581 | O  | HOH A | 1 | 53.747 | 33.887 | 25.365 | O |
| ATOM | 8582 | H1 | HOH A | 2 | 53.751 | 32.963 | 25.039 | H |
| ATOM | 8583 | H2 | HOH A | 3 | 54.551 | 34.332 | 25.024 | H |
| ATOM | 8584 | O  | HOH A | 1 | 53.732 | 33.919 | 47.519 | O |
| ATOM | 8585 | H1 | HOH A | 2 | 53.741 | 32.994 | 47.196 | H |
| ATOM | 8586 | H2 | HOH A | 3 | 54.531 | 34.368 | 47.172 | H |
| ATOM | 8587 | O  | HOH A | 1 | 13.036 | 33.868 | 3.310  | O |
| ATOM | 8588 | H1 | HOH A | 2 | 13.842 | 34.331 | 2.997  | H |
| ATOM | 8589 | H2 | HOH A | 3 | 13.039 | 33.882 | 4.289  | H |
| ATOM | 8590 | O  | HOH A | 1 | 12.998 | 33.821 | 25.472 | O |
| ATOM | 8591 | H1 | HOH A | 2 | 13.804 | 34.284 | 25.161 | H |
| ATOM | 8592 | H2 | HOH A | 3 | 12.999 | 33.837 | 26.452 | H |
| ATOM | 8593 | O  | HOH A | 1 | 12.987 | 33.851 | 47.567 | O |
| ATOM | 8594 | H1 | HOH A | 2 | 13.795 | 34.310 | 47.258 | H |
| ATOM | 8595 | H2 | HOH A | 3 | 12.987 | 33.864 | 48.547 | H |
| ATOM | 8596 | O  | HOH A | 1 | 35.606 | 34.054 | 3.284  | O |
| ATOM | 8597 | H1 | HOH A | 2 | 36.410 | 34.522 | 2.974  | H |
| ATOM | 8598 | H2 | HOH A | 3 | 35.612 | 34.059 | 4.264  | H |
| ATOM | 8599 | O  | HOH A | 1 | 35.634 | 33.890 | 25.406 | O |
| ATOM | 8600 | H1 | HOH A | 2 | 36.443 | 34.352 | 25.103 | H |
| ATOM | 8601 | H2 | HOH A | 3 | 35.633 | 33.892 | 26.386 | H |
| ATOM | 8602 | O  | HOH A | 1 | 35.632 | 33.871 | 47.512 | O |
| ATOM | 8603 | H1 | HOH A | 2 | 36.442 | 34.329 | 47.203 | H |
| ATOM | 8604 | H2 | HOH A | 3 | 35.627 | 33.894 | 48.492 | H |
| ATOM | 8605 | O  | HOH A | 1 | 58.210 | 33.920 | 3.247  | O |
| ATOM | 8606 | H1 | HOH A | 2 | 59.025 | 34.374 | 2.946  | H |

|      |      |    |       |   |        |        |        |   |
|------|------|----|-------|---|--------|--------|--------|---|
| ATOM | 8607 | H2 | HOH A | 3 | 58.207 | 33.921 | 4.227  | H |
| ATOM | 8608 | O  | HOH A | 1 | 58.238 | 33.842 | 25.354 | O |
| ATOM | 8609 | H1 | HOH A | 2 | 59.048 | 34.301 | 25.048 | H |
| ATOM | 8610 | H2 | HOH A | 3 | 58.239 | 33.846 | 26.333 | H |
| ATOM | 8611 | O  | HOH A | 1 | 58.214 | 33.899 | 47.525 | O |
| ATOM | 8612 | H1 | HOH A | 2 | 59.021 | 34.357 | 47.209 | H |
| ATOM | 8613 | H2 | HOH A | 3 | 58.217 | 33.923 | 48.505 | H |
| ATOM | 8614 | O  | HOH A | 1 | 17.584 | 33.875 | 3.318  | O |
| ATOM | 8615 | H1 | HOH A | 2 | 18.380 | 34.348 | 2.996  | H |
| ATOM | 8616 | H2 | HOH A | 3 | 17.592 | 33.901 | 4.297  | H |
| ATOM | 8617 | O  | HOH A | 1 | 17.554 | 33.806 | 25.481 | O |
| ATOM | 8618 | H1 | HOH A | 2 | 18.353 | 34.276 | 25.162 | H |
| ATOM | 8619 | H2 | HOH A | 3 | 17.552 | 33.842 | 26.460 | H |
| ATOM | 8620 | O  | HOH A | 1 | 17.539 | 33.838 | 47.571 | O |
| ATOM | 8621 | H1 | HOH A | 2 | 18.331 | 34.314 | 47.242 | H |
| ATOM | 8622 | H2 | HOH A | 3 | 17.554 | 33.867 | 48.550 | H |
| ATOM | 8623 | O  | HOH A | 1 | 40.161 | 34.041 | 3.269  | O |
| ATOM | 8624 | H1 | HOH A | 2 | 40.958 | 34.509 | 2.943  | H |
| ATOM | 8625 | H2 | HOH A | 3 | 40.177 | 34.059 | 4.248  | H |
| ATOM | 8626 | O  | HOH A | 1 | 40.202 | 33.865 | 25.398 | O |
| ATOM | 8627 | H1 | HOH A | 2 | 40.997 | 34.338 | 25.074 | H |
| ATOM | 8628 | H2 | HOH A | 3 | 40.215 | 33.886 | 26.377 | H |
| ATOM | 8629 | O  | HOH A | 1 | 40.183 | 33.851 | 47.507 | O |
| ATOM | 8630 | H1 | HOH A | 2 | 40.981 | 34.317 | 47.181 | H |
| ATOM | 8631 | H2 | HOH A | 3 | 40.187 | 33.892 | 48.486 | H |
| ATOM | 8632 | O  | HOH A | 1 | 62.767 | 33.866 | 3.285  | O |
| ATOM | 8633 | H1 | HOH A | 2 | 63.568 | 34.334 | 2.969  | H |
| ATOM | 8634 | H2 | HOH A | 3 | 62.770 | 33.887 | 4.264  | H |
| ATOM | 8635 | O  | HOH A | 1 | 62.782 | 33.797 | 25.374 | O |
| ATOM | 8636 | H1 | HOH A | 2 | 63.574 | 34.276 | 25.051 | H |
| ATOM | 8637 | H2 | HOH A | 3 | 62.788 | 33.829 | 26.353 | H |
| ATOM | 8638 | O  | HOH A | 1 | 62.746 | 33.868 | 47.558 | O |
| ATOM | 8639 | H1 | HOH A | 2 | 63.542 | 34.338 | 47.231 | H |
| ATOM | 8640 | H2 | HOH A | 3 | 62.758 | 33.900 | 48.538 | H |
| ATOM | 8641 | O  | HOH A | 1 | 1.722  | 37.785 | 3.285  | O |
| ATOM | 8642 | H1 | HOH A | 2 | 1.751  | 36.868 | 2.940  | H |

|      |      |    |       |   |        |        |        |   |
|------|------|----|-------|---|--------|--------|--------|---|
| ATOM | 8643 | H2 | HOH A | 3 | 2.525  | 38.252 | 2.972  | H |
| ATOM | 8644 | O  | HOH A | 1 | 1.720  | 37.776 | 25.393 | O |
| ATOM | 8645 | H1 | HOH A | 2 | 1.753  | 36.859 | 25.047 | H |
| ATOM | 8646 | H2 | HOH A | 3 | 2.524  | 38.244 | 25.085 | H |
| ATOM | 8647 | O  | HOH A | 1 | 1.689  | 37.819 | 47.544 | O |
| ATOM | 8648 | H1 | HOH A | 2 | 1.721  | 36.899 | 47.208 | H |
| ATOM | 8649 | H2 | HOH A | 3 | 2.493  | 38.284 | 47.231 | H |
| ATOM | 8650 | O  | HOH A | 1 | 24.322 | 37.945 | 3.296  | O |
| ATOM | 8651 | H1 | HOH A | 2 | 24.358 | 37.028 | 2.953  | H |
| ATOM | 8652 | H2 | HOH A | 3 | 25.120 | 38.418 | 2.979  | H |
| ATOM | 8653 | O  | HOH A | 1 | 24.320 | 37.816 | 25.448 | O |
| ATOM | 8654 | H1 | HOH A | 2 | 24.354 | 36.897 | 25.112 | H |
| ATOM | 8655 | H2 | HOH A | 3 | 25.117 | 38.286 | 25.125 | H |
| ATOM | 8656 | O  | HOH A | 1 | 24.319 | 37.815 | 47.536 | O |
| ATOM | 8657 | H1 | HOH A | 2 | 24.348 | 36.893 | 47.203 | H |
| ATOM | 8658 | H2 | HOH A | 3 | 25.122 | 38.277 | 47.217 | H |
| ATOM | 8659 | O  | HOH A | 1 | 46.928 | 37.983 | 3.243  | O |
| ATOM | 8660 | H1 | HOH A | 2 | 46.954 | 37.063 | 2.904  | H |
| ATOM | 8661 | H2 | HOH A | 3 | 47.733 | 38.444 | 2.929  | H |
| ATOM | 8662 | O  | HOH A | 1 | 46.949 | 37.830 | 25.347 | O |
| ATOM | 8663 | H1 | HOH A | 2 | 46.979 | 36.911 | 25.008 | H |
| ATOM | 8664 | H2 | HOH A | 3 | 47.753 | 38.295 | 25.033 | H |
| ATOM | 8665 | O  | HOH A | 1 | 46.934 | 37.843 | 47.483 | O |
| ATOM | 8666 | H1 | HOH A | 2 | 46.967 | 36.923 | 47.146 | H |
| ATOM | 8667 | H2 | HOH A | 3 | 47.739 | 38.308 | 47.175 | H |
| ATOM | 8668 | O  | HOH A | 1 | 6.263  | 37.751 | 3.321  | O |
| ATOM | 8669 | H1 | HOH A | 2 | 5.472  | 38.230 | 2.996  | H |
| ATOM | 8670 | H2 | HOH A | 3 | 7.058  | 38.223 | 2.996  | H |
| ATOM | 8671 | O  | HOH A | 1 | 6.259  | 37.754 | 25.445 | O |
| ATOM | 8672 | H1 | HOH A | 2 | 5.473  | 38.235 | 25.112 | H |
| ATOM | 8673 | H2 | HOH A | 3 | 7.059  | 38.223 | 25.126 | H |
| ATOM | 8674 | O  | HOH A | 1 | 6.228  | 37.788 | 47.578 | O |
| ATOM | 8675 | H1 | HOH A | 2 | 5.437  | 38.266 | 47.251 | H |
| ATOM | 8676 | H2 | HOH A | 3 | 7.023  | 38.256 | 47.248 | H |
| ATOM | 8677 | O  | HOH A | 1 | 28.858 | 37.965 | 3.309  | O |
| ATOM | 8678 | H1 | HOH A | 2 | 28.064 | 38.442 | 2.990  | H |

|      |      |    |       |   |        |        |        |   |
|------|------|----|-------|---|--------|--------|--------|---|
| ATOM | 8679 | H2 | HOH A | 3 | 29.649 | 38.441 | 2.981  | H |
| ATOM | 8680 | O  | HOH A | 1 | 28.860 | 37.812 | 25.454 | O |
| ATOM | 8681 | H1 | HOH A | 2 | 28.067 | 38.286 | 25.125 | H |
| ATOM | 8682 | H2 | HOH A | 3 | 29.653 | 38.287 | 25.131 | H |
| ATOM | 8683 | O  | HOH A | 1 | 28.873 | 37.800 | 47.542 | O |
| ATOM | 8684 | H1 | HOH A | 2 | 28.084 | 38.278 | 47.211 | H |
| ATOM | 8685 | H2 | HOH A | 3 | 29.669 | 38.266 | 47.213 | H |
| ATOM | 8686 | O  | HOH A | 1 | 51.449 | 37.918 | 3.265  | O |
| ATOM | 8687 | H1 | HOH A | 2 | 50.666 | 38.406 | 2.934  | H |
| ATOM | 8688 | H2 | HOH A | 3 | 52.251 | 38.385 | 2.950  | H |
| ATOM | 8689 | O  | HOH A | 1 | 51.492 | 37.782 | 25.369 | O |
| ATOM | 8690 | H1 | HOH A | 2 | 50.706 | 38.268 | 25.044 | H |
| ATOM | 8691 | H2 | HOH A | 3 | 52.291 | 38.248 | 25.044 | H |
| ATOM | 8692 | O  | HOH A | 1 | 51.468 | 37.820 | 47.514 | O |
| ATOM | 8693 | H1 | HOH A | 2 | 50.679 | 38.297 | 47.180 | H |
| ATOM | 8694 | H2 | HOH A | 3 | 52.265 | 38.284 | 47.184 | H |
| ATOM | 8695 | O  | HOH A | 1 | 10.811 | 37.808 | 3.306  | O |
| ATOM | 8696 | H1 | HOH A | 2 | 10.816 | 36.882 | 2.987  | H |
| ATOM | 8697 | H2 | HOH A | 3 | 10.796 | 37.791 | 4.286  | H |
| ATOM | 8698 | O  | HOH A | 1 | 10.778 | 37.790 | 25.440 | O |
| ATOM | 8699 | H1 | HOH A | 2 | 10.774 | 36.859 | 25.133 | H |
| ATOM | 8700 | H2 | HOH A | 3 | 10.762 | 37.785 | 26.420 | H |
| ATOM | 8701 | O  | HOH A | 1 | 10.777 | 37.826 | 47.562 | O |
| ATOM | 8702 | H1 | HOH A | 2 | 10.777 | 36.898 | 47.248 | H |
| ATOM | 8703 | H2 | HOH A | 3 | 10.761 | 37.813 | 48.542 | H |
| ATOM | 8704 | O  | HOH A | 1 | 33.394 | 38.018 | 3.285  | O |
| ATOM | 8705 | H1 | HOH A | 2 | 33.392 | 37.089 | 2.973  | H |
| ATOM | 8706 | H2 | HOH A | 3 | 33.372 | 38.008 | 4.265  | H |
| ATOM | 8707 | O  | HOH A | 1 | 33.414 | 37.848 | 25.422 | O |
| ATOM | 8708 | H1 | HOH A | 2 | 33.410 | 36.922 | 25.102 | H |
| ATOM | 8709 | H2 | HOH A | 3 | 33.395 | 37.831 | 26.401 | H |
| ATOM | 8710 | O  | HOH A | 1 | 33.421 | 37.844 | 47.519 | O |
| ATOM | 8711 | H1 | HOH A | 2 | 33.421 | 36.912 | 47.214 | H |
| ATOM | 8712 | H2 | HOH A | 3 | 33.404 | 37.842 | 48.498 | H |
| ATOM | 8713 | O  | HOH A | 1 | 55.997 | 37.931 | 3.237  | O |
| ATOM | 8714 | H1 | HOH A | 2 | 55.997 | 37.003 | 2.922  | H |

|      |      |    |       |   |        |        |        |   |
|------|------|----|-------|---|--------|--------|--------|---|
| ATOM | 8715 | H2 | HOH A | 3 | 55.980 | 37.917 | 4.217  | H |
| ATOM | 8716 | O  | HOH A | 1 | 56.032 | 37.816 | 25.365 | O |
| ATOM | 8717 | H1 | HOH A | 2 | 56.027 | 36.887 | 25.052 | H |
| ATOM | 8718 | H2 | HOH A | 3 | 56.023 | 37.806 | 26.345 | H |
| ATOM | 8719 | O  | HOH A | 1 | 56.008 | 37.857 | 47.515 | O |
| ATOM | 8720 | H1 | HOH A | 2 | 56.007 | 36.927 | 47.207 | H |
| ATOM | 8721 | H2 | HOH A | 3 | 55.987 | 37.852 | 48.494 | H |
| ATOM | 8722 | O  | HOH A | 1 | 15.312 | 37.777 | 3.344  | O |
| ATOM | 8723 | H1 | HOH A | 2 | 15.300 | 36.861 | 2.996  | H |
| ATOM | 8724 | H2 | HOH A | 3 | 14.513 | 38.237 | 3.013  | H |
| ATOM | 8725 | O  | HOH A | 1 | 15.285 | 37.735 | 25.504 | O |
| ATOM | 8726 | H1 | HOH A | 2 | 15.273 | 36.811 | 25.176 | H |
| ATOM | 8727 | H2 | HOH A | 3 | 14.495 | 38.193 | 25.148 | H |
| ATOM | 8728 | O  | HOH A | 1 | 15.286 | 37.751 | 47.599 | O |
| ATOM | 8729 | H1 | HOH A | 2 | 15.265 | 36.830 | 47.266 | H |
| ATOM | 8730 | H2 | HOH A | 3 | 14.494 | 38.216 | 47.256 | H |
| ATOM | 8731 | O  | HOH A | 1 | 37.889 | 37.972 | 3.303  | O |
| ATOM | 8732 | H1 | HOH A | 2 | 37.869 | 37.053 | 2.964  | H |
| ATOM | 8733 | H2 | HOH A | 3 | 37.091 | 38.434 | 2.972  | H |
| ATOM | 8734 | O  | HOH A | 1 | 37.926 | 37.797 | 25.433 | O |
| ATOM | 8735 | H1 | HOH A | 2 | 37.920 | 36.878 | 25.093 | H |
| ATOM | 8736 | H2 | HOH A | 3 | 37.126 | 38.251 | 25.093 | H |
| ATOM | 8737 | O  | HOH A | 1 | 37.921 | 37.774 | 47.544 | O |
| ATOM | 8738 | H1 | HOH A | 2 | 37.912 | 36.852 | 47.211 | H |
| ATOM | 8739 | H2 | HOH A | 3 | 37.126 | 38.229 | 47.195 | H |
| ATOM | 8740 | O  | HOH A | 1 | 60.506 | 37.811 | 3.304  | O |
| ATOM | 8741 | H1 | HOH A | 2 | 60.495 | 36.893 | 2.963  | H |
| ATOM | 8742 | H2 | HOH A | 3 | 59.710 | 38.270 | 2.963  | H |
| ATOM | 8743 | O  | HOH A | 1 | 60.528 | 37.738 | 25.402 | O |
| ATOM | 8744 | H1 | HOH A | 2 | 60.517 | 36.822 | 25.054 | H |
| ATOM | 8745 | H2 | HOH A | 3 | 59.732 | 38.200 | 25.066 | H |
| ATOM | 8746 | O  | HOH A | 1 | 60.481 | 37.799 | 47.564 | O |
| ATOM | 8747 | H1 | HOH A | 2 | 60.466 | 36.880 | 47.226 | H |
| ATOM | 8748 | H2 | HOH A | 3 | 59.686 | 38.260 | 47.222 | H |
| ATOM | 8749 | O  | HOH A | 1 | 19.817 | 37.837 | 3.305  | O |
| ATOM | 8750 | H1 | HOH A | 2 | 19.810 | 36.917 | 2.970  | H |

|      |      |    |       |   |        |        |        |   |
|------|------|----|-------|---|--------|--------|--------|---|
| ATOM | 8751 | H2 | HOH A | 3 | 19.007 | 38.284 | 2.981  | H |
| ATOM | 8752 | O  | HOH A | 1 | 19.790 | 37.768 | 25.470 | O |
| ATOM | 8753 | H1 | HOH A | 2 | 19.783 | 36.845 | 25.142 | H |
| ATOM | 8754 | H2 | HOH A | 3 | 18.986 | 38.215 | 25.133 | H |
| ATOM | 8755 | O  | HOH A | 1 | 19.795 | 37.781 | 47.577 | O |
| ATOM | 8756 | H1 | HOH A | 2 | 19.787 | 36.859 | 47.244 | H |
| ATOM | 8757 | H2 | HOH A | 3 | 18.990 | 38.230 | 47.244 | H |
| ATOM | 8758 | O  | HOH A | 1 | 42.391 | 37.984 | 3.258  | O |
| ATOM | 8759 | H1 | HOH A | 2 | 42.378 | 37.062 | 2.924  | H |
| ATOM | 8760 | H2 | HOH A | 3 | 41.590 | 38.438 | 2.923  | H |
| ATOM | 8761 | O  | HOH A | 1 | 42.437 | 37.803 | 25.381 | O |
| ATOM | 8762 | H1 | HOH A | 2 | 42.435 | 36.885 | 25.040 | H |
| ATOM | 8763 | H2 | HOH A | 3 | 41.629 | 38.251 | 25.052 | H |
| ATOM | 8764 | O  | HOH A | 1 | 42.431 | 37.800 | 47.504 | O |
| ATOM | 8765 | H1 | HOH A | 2 | 42.427 | 36.878 | 47.172 | H |
| ATOM | 8766 | H2 | HOH A | 3 | 41.624 | 38.245 | 47.173 | H |
| ATOM | 8767 | O  | HOH A | 1 | 65.008 | 37.785 | 3.298  | O |
| ATOM | 8768 | H1 | HOH A | 2 | 64.993 | 36.866 | 2.961  | H |
| ATOM | 8769 | H2 | HOH A | 3 | 64.206 | 38.242 | 2.968  | H |
| ATOM | 8770 | O  | HOH A | 1 | 65.020 | 37.757 | 25.388 | O |
| ATOM | 8771 | H1 | HOH A | 2 | 65.003 | 36.835 | 25.055 | H |
| ATOM | 8772 | H2 | HOH A | 3 | 64.217 | 38.213 | 25.059 | H |
| ATOM | 8773 | O  | HOH A | 1 | 64.978 | 37.795 | 47.548 | O |
| ATOM | 8774 | H1 | HOH A | 2 | 64.974 | 36.875 | 47.211 | H |
| ATOM | 8775 | H2 | HOH A | 3 | 64.173 | 38.244 | 47.214 | H |
| ATOM | 8776 | O  | HOH A | 1 | 22.062 | 41.794 | 3.298  | O |
| ATOM | 8777 | H1 | HOH A | 2 | 22.052 | 40.865 | 2.987  | H |
| ATOM | 8778 | H2 | HOH A | 3 | 22.060 | 41.786 | 4.278  | H |
| ATOM | 8779 | O  | HOH A | 1 | 22.065 | 41.692 | 25.456 | O |
| ATOM | 8780 | H1 | HOH A | 2 | 22.047 | 40.761 | 25.150 | H |
| ATOM | 8781 | H2 | HOH A | 3 | 22.066 | 41.688 | 26.436 | H |
| ATOM | 8782 | O  | HOH A | 1 | 22.059 | 41.709 | 47.555 | O |
| ATOM | 8783 | H1 | HOH A | 2 | 22.051 | 40.776 | 47.256 | H |
| ATOM | 8784 | H2 | HOH A | 3 | 22.069 | 41.713 | 48.535 | H |
| ATOM | 8785 | O  | HOH A | 1 | 44.651 | 41.902 | 3.244  | O |
| ATOM | 8786 | H1 | HOH A | 2 | 44.652 | 40.971 | 2.939  | H |



|      |      |    |       |   |        |        |        |   |
|------|------|----|-------|---|--------|--------|--------|---|
| ATOM | 8787 | H2 | HOH A | 3 | 44.652 | 41.899 | 4.224  | H |
| ATOM | 8788 | O  | HOH A | 1 | 44.692 | 41.728 | 25.373 | O |
| ATOM | 8789 | H1 | HOH A | 2 | 44.684 | 40.799 | 25.063 | H |
| ATOM | 8790 | H2 | HOH A | 3 | 44.691 | 41.721 | 26.353 | H |
| ATOM | 8791 | O  | HOH A | 1 | 44.675 | 41.742 | 47.492 | O |
| ATOM | 8792 | H1 | HOH A | 2 | 44.674 | 40.807 | 47.199 | H |
| ATOM | 8793 | H2 | HOH A | 3 | 44.671 | 41.752 | 48.472 | H |
| ATOM | 8794 | O  | HOH A | 1 | 67.249 | 41.710 | 3.293  | O |
| ATOM | 8795 | H1 | HOH A | 2 | 67.247 | 40.781 | 2.983  | H |
| ATOM | 8796 | H2 | HOH A | 3 | 67.251 | 41.703 | 4.273  | H |
| ATOM | 8797 | O  | HOH A | 1 | 67.263 | 41.677 | 25.391 | O |
| ATOM | 8798 | H1 | HOH A | 2 | 67.249 | 40.746 | 25.083 | H |
| ATOM | 8799 | H2 | HOH A | 3 | 67.259 | 41.672 | 26.371 | H |
| ATOM | 8800 | O  | HOH A | 1 | 67.239 | 41.724 | 47.548 | O |
| ATOM | 8801 | H1 | HOH A | 2 | 67.228 | 40.791 | 47.249 | H |
| ATOM | 8802 | H2 | HOH A | 3 | 67.234 | 41.728 | 48.528 | H |
| ATOM | 8803 | O  | HOH A | 1 | 3.993  | 41.674 | 3.333  | O |
| ATOM | 8804 | H1 | HOH A | 2 | 4.793  | 42.146 | 3.020  | H |
| ATOM | 8805 | H2 | HOH A | 3 | 4.002  | 41.679 | 4.313  | H |
| ATOM | 8806 | O  | HOH A | 1 | 3.991  | 41.661 | 25.439 | O |
| ATOM | 8807 | H1 | HOH A | 2 | 4.792  | 42.133 | 25.127 | H |
| ATOM | 8808 | H2 | HOH A | 3 | 3.996  | 41.671 | 26.419 | H |
| ATOM | 8809 | O  | HOH A | 1 | 3.960  | 41.699 | 47.598 | O |
| ATOM | 8810 | H1 | HOH A | 2 | 4.759  | 42.172 | 47.283 | H |
| ATOM | 8811 | H2 | HOH A | 3 | 3.966  | 41.714 | 48.578 | H |
| ATOM | 8812 | O  | HOH A | 1 | 26.599 | 41.844 | 3.317  | O |
| ATOM | 8813 | H1 | HOH A | 2 | 27.391 | 42.330 | 3.005  | H |
| ATOM | 8814 | H2 | HOH A | 3 | 26.608 | 41.848 | 4.297  | H |
| ATOM | 8815 | O  | HOH A | 1 | 26.589 | 41.708 | 25.473 | O |
| ATOM | 8816 | H1 | HOH A | 2 | 27.388 | 42.189 | 25.172 | H |
| ATOM | 8817 | H2 | HOH A | 3 | 26.586 | 41.709 | 26.453 | H |
| ATOM | 8818 | O  | HOH A | 1 | 26.597 | 41.705 | 47.553 | O |
| ATOM | 8819 | H1 | HOH A | 2 | 27.393 | 42.179 | 47.235 | H |
| ATOM | 8820 | H2 | HOH A | 3 | 26.609 | 41.713 | 48.533 | H |
| ATOM | 8821 | O  | HOH A | 1 | 49.178 | 41.862 | 3.253  | O |
| ATOM | 8822 | H1 | HOH A | 2 | 49.977 | 42.338 | 2.947  | H |

|      |      |    |       |   |        |        |        |   |
|------|------|----|-------|---|--------|--------|--------|---|
| ATOM | 8823 | H2 | HOH A | 3 | 49.181 | 41.864 | 4.233  | H |
| ATOM | 8824 | O  | HOH A | 1 | 49.230 | 41.702 | 25.369 | O |
| ATOM | 8825 | H1 | HOH A | 2 | 50.028 | 42.177 | 25.056 | H |
| ATOM | 8826 | H2 | HOH A | 3 | 49.241 | 41.705 | 26.349 | H |
| ATOM | 8827 | O  | HOH A | 1 | 49.209 | 41.733 | 47.530 | O |
| ATOM | 8828 | H1 | HOH A | 2 | 50.005 | 42.206 | 47.211 | H |
| ATOM | 8829 | H2 | HOH A | 3 | 49.218 | 41.752 | 48.510 | H |
| ATOM | 8830 | O  | HOH A | 1 | 8.509  | 41.682 | 3.313  | O |
| ATOM | 8831 | H1 | HOH A | 2 | 7.715  | 42.157 | 2.990  | H |
| ATOM | 8832 | H2 | HOH A | 3 | 9.301  | 42.161 | 2.991  | H |
| ATOM | 8833 | O  | HOH A | 1 | 8.489  | 41.678 | 25.450 | O |
| ATOM | 8834 | H1 | HOH A | 2 | 7.706  | 42.161 | 25.111 | H |
| ATOM | 8835 | H2 | HOH A | 3 | 9.291  | 42.146 | 25.138 | H |
| ATOM | 8836 | O  | HOH A | 1 | 8.467  | 41.700 | 47.568 | O |
| ATOM | 8837 | H1 | HOH A | 2 | 7.679  | 42.183 | 47.243 | H |
| ATOM | 8838 | H2 | HOH A | 3 | 9.264  | 42.171 | 47.247 | H |
| ATOM | 8839 | O  | HOH A | 1 | 31.104 | 41.897 | 3.292  | O |
| ATOM | 8840 | H1 | HOH A | 2 | 30.308 | 42.370 | 2.971  | H |
| ATOM | 8841 | H2 | HOH A | 3 | 31.894 | 42.381 | 2.972  | H |
| ATOM | 8842 | O  | HOH A | 1 | 31.107 | 41.737 | 25.426 | O |
| ATOM | 8843 | H1 | HOH A | 2 | 30.313 | 42.213 | 25.106 | H |
| ATOM | 8844 | H2 | HOH A | 3 | 31.898 | 42.214 | 25.101 | H |
| ATOM | 8845 | O  | HOH A | 1 | 31.097 | 41.721 | 47.527 | O |
| ATOM | 8846 | H1 | HOH A | 2 | 30.310 | 42.203 | 47.201 | H |
| ATOM | 8847 | H2 | HOH A | 3 | 31.895 | 42.186 | 47.200 | H |
| ATOM | 8848 | O  | HOH A | 1 | 53.683 | 41.830 | 3.256  | O |
| ATOM | 8849 | H1 | HOH A | 2 | 52.896 | 42.312 | 2.929  | H |
| ATOM | 8850 | H2 | HOH A | 3 | 54.481 | 42.298 | 2.933  | H |
| ATOM | 8851 | O  | HOH A | 1 | 53.739 | 41.697 | 25.364 | O |
| ATOM | 8852 | H1 | HOH A | 2 | 52.947 | 42.174 | 25.041 | H |
| ATOM | 8853 | H2 | HOH A | 3 | 54.532 | 42.175 | 25.043 | H |
| ATOM | 8854 | O  | HOH A | 1 | 53.686 | 41.734 | 47.505 | O |
| ATOM | 8855 | H1 | HOH A | 2 | 52.895 | 42.209 | 47.175 | H |
| ATOM | 8856 | H2 | HOH A | 3 | 54.481 | 42.209 | 47.184 | H |
| ATOM | 8857 | O  | HOH A | 1 | 13.044 | 41.720 | 3.323  | O |
| ATOM | 8858 | H1 | HOH A | 2 | 13.049 | 40.791 | 3.011  | H |

|      |      |    |       |   |        |        |        |   |
|------|------|----|-------|---|--------|--------|--------|---|
| ATOM | 8859 | H2 | HOH A | 3 | 13.046 | 41.710 | 4.303  | H |
| ATOM | 8860 | O  | HOH A | 1 | 13.028 | 41.691 | 25.472 | O |
| ATOM | 8861 | H1 | HOH A | 2 | 13.027 | 40.760 | 25.165 | H |
| ATOM | 8862 | H2 | HOH A | 3 | 13.026 | 41.686 | 26.452 | H |
| ATOM | 8863 | O  | HOH A | 1 | 13.022 | 41.718 | 47.597 | O |
| ATOM | 8864 | H1 | HOH A | 2 | 13.031 | 40.786 | 47.293 | H |
| ATOM | 8865 | H2 | HOH A | 3 | 13.021 | 41.717 | 48.577 | H |
| ATOM | 8866 | O  | HOH A | 1 | 35.619 | 41.939 | 3.290  | O |
| ATOM | 8867 | H1 | HOH A | 2 | 35.623 | 41.012 | 2.972  | H |
| ATOM | 8868 | H2 | HOH A | 3 | 35.614 | 41.923 | 4.270  | H |
| ATOM | 8869 | O  | HOH A | 1 | 35.642 | 41.741 | 25.433 | O |
| ATOM | 8870 | H1 | HOH A | 2 | 35.647 | 40.813 | 25.116 | H |
| ATOM | 8871 | H2 | HOH A | 3 | 35.648 | 41.725 | 26.413 | H |
| ATOM | 8872 | O  | HOH A | 1 | 35.653 | 41.736 | 47.525 | O |
| ATOM | 8873 | H1 | HOH A | 2 | 35.661 | 40.803 | 47.224 | H |
| ATOM | 8874 | H2 | HOH A | 3 | 35.655 | 41.738 | 48.505 | H |
| ATOM | 8875 | O  | HOH A | 1 | 58.224 | 41.789 | 3.277  | O |
| ATOM | 8876 | H1 | HOH A | 2 | 58.235 | 40.862 | 2.960  | H |
| ATOM | 8877 | H2 | HOH A | 3 | 58.221 | 41.774 | 4.257  | H |
| ATOM | 8878 | O  | HOH A | 1 | 58.263 | 41.706 | 25.379 | O |
| ATOM | 8879 | H1 | HOH A | 2 | 58.271 | 40.775 | 25.072 | H |
| ATOM | 8880 | H2 | HOH A | 3 | 58.260 | 41.702 | 26.359 | H |
| ATOM | 8881 | O  | HOH A | 1 | 58.218 | 41.761 | 47.531 | O |
| ATOM | 8882 | H1 | HOH A | 2 | 58.226 | 40.830 | 47.224 | H |
| ATOM | 8883 | H2 | HOH A | 3 | 58.208 | 41.756 | 48.511 | H |
| ATOM | 8884 | O  | HOH A | 1 | 17.535 | 41.745 | 3.334  | O |
| ATOM | 8885 | H1 | HOH A | 2 | 17.547 | 40.824 | 3.001  | H |
| ATOM | 8886 | H2 | HOH A | 3 | 18.334 | 42.200 | 2.994  | H |
| ATOM | 8887 | O  | HOH A | 1 | 17.536 | 41.694 | 25.473 | O |
| ATOM | 8888 | H1 | HOH A | 2 | 17.536 | 40.775 | 25.133 | H |
| ATOM | 8889 | H2 | HOH A | 3 | 18.339 | 42.142 | 25.137 | H |
| ATOM | 8890 | O  | HOH A | 1 | 17.525 | 41.707 | 47.582 | O |
| ATOM | 8891 | H1 | HOH A | 2 | 17.530 | 40.784 | 47.254 | H |
| ATOM | 8892 | H2 | HOH A | 3 | 18.333 | 42.151 | 47.250 | H |
| ATOM | 8893 | O  | HOH A | 1 | 40.120 | 41.918 | 3.287  | O |
| ATOM | 8894 | H1 | HOH A | 2 | 40.126 | 40.998 | 2.949  | H |

|      |      |    |       |   |        |        |        |   |
|------|------|----|-------|---|--------|--------|--------|---|
| ATOM | 8895 | H2 | HOH A | 3 | 40.919 | 42.371 | 2.945  | H |
| ATOM | 8896 | O  | HOH A | 1 | 40.154 | 41.738 | 25.411 | O |
| ATOM | 8897 | H1 | HOH A | 2 | 40.163 | 40.817 | 25.077 | H |
| ATOM | 8898 | H2 | HOH A | 3 | 40.954 | 42.191 | 25.072 | H |
| ATOM | 8899 | O  | HOH A | 1 | 40.164 | 41.725 | 47.516 | O |
| ATOM | 8900 | H1 | HOH A | 2 | 40.171 | 40.802 | 47.186 | H |
| ATOM | 8901 | H2 | HOH A | 3 | 40.962 | 42.177 | 47.170 | H |
| ATOM | 8902 | O  | HOH A | 1 | 62.723 | 41.739 | 3.291  | O |
| ATOM | 8903 | H1 | HOH A | 2 | 62.733 | 40.820 | 2.950  | H |
| ATOM | 8904 | H2 | HOH A | 3 | 63.530 | 42.191 | 2.968  | H |
| ATOM | 8905 | O  | HOH A | 1 | 62.753 | 41.692 | 25.393 | O |
| ATOM | 8906 | H1 | HOH A | 2 | 62.757 | 40.769 | 25.063 | H |
| ATOM | 8907 | H2 | HOH A | 3 | 63.559 | 42.137 | 25.057 | H |
| ATOM | 8908 | O  | HOH A | 1 | 62.727 | 41.731 | 47.552 | O |
| ATOM | 8909 | H1 | HOH A | 2 | 62.727 | 40.812 | 47.210 | H |
| ATOM | 8910 | H2 | HOH A | 3 | 63.530 | 42.180 | 47.216 | H |
| ATOM | 8911 | O  | HOH A | 1 | 22.077 | 47.015 | 2.371  | O |
| ATOM | 8912 | H1 | HOH A | 2 | 22.868 | 46.542 | 2.703  | H |
| ATOM | 8913 | H2 | HOH A | 3 | 21.282 | 46.548 | 2.705  | H |
| ATOM | 8914 | O  | HOH A | 1 | 22.081 | 46.908 | 24.535 | O |
| ATOM | 8915 | H1 | HOH A | 2 | 22.866 | 46.425 | 24.866 | H |
| ATOM | 8916 | H2 | HOH A | 3 | 21.281 | 46.451 | 24.869 | H |
| ATOM | 8917 | O  | HOH A | 1 | 22.071 | 46.916 | 46.639 | O |
| ATOM | 8918 | H1 | HOH A | 2 | 22.862 | 46.442 | 46.971 | H |
| ATOM | 8919 | H2 | HOH A | 3 | 21.276 | 46.449 | 46.972 | H |
| ATOM | 8920 | O  | HOH A | 1 | 44.676 | 47.106 | 2.328  | O |
| ATOM | 8921 | H1 | HOH A | 2 | 45.462 | 46.629 | 2.667  | H |
| ATOM | 8922 | H2 | HOH A | 3 | 43.877 | 46.654 | 2.671  | H |
| ATOM | 8923 | O  | HOH A | 1 | 44.704 | 46.941 | 24.457 | O |
| ATOM | 8924 | H1 | HOH A | 2 | 45.489 | 46.454 | 24.783 | H |
| ATOM | 8925 | H2 | HOH A | 3 | 43.904 | 46.486 | 24.794 | H |
| ATOM | 8926 | O  | HOH A | 1 | 44.709 | 46.947 | 46.570 | O |
| ATOM | 8927 | H1 | HOH A | 2 | 45.496 | 46.470 | 46.908 | H |
| ATOM | 8928 | H2 | HOH A | 3 | 43.910 | 46.485 | 46.900 | H |
| ATOM | 8929 | O  | HOH A | 1 | 67.282 | 46.913 | 2.358  | O |
| ATOM | 8930 | H1 | HOH A | 2 | 68.064 | 46.429 | 2.696  | H |

|      |      |    |       |   |        |        |        |   |
|------|------|----|-------|---|--------|--------|--------|---|
| ATOM | 8931 | H2 | HOH A | 3 | 66.478 | 46.458 | 2.687  | H |
| ATOM | 8932 | O  | HOH A | 1 | 67.295 | 46.884 | 24.474 | O |
| ATOM | 8933 | H1 | HOH A | 2 | 68.082 | 46.406 | 24.810 | H |
| ATOM | 8934 | H2 | HOH A | 3 | 66.496 | 46.425 | 24.808 | H |
| ATOM | 8935 | O  | HOH A | 1 | 67.268 | 46.934 | 46.625 | O |
| ATOM | 8936 | H1 | HOH A | 2 | 68.050 | 46.451 | 46.966 | H |
| ATOM | 8937 | H2 | HOH A | 3 | 66.464 | 46.480 | 46.955 | H |
| ATOM | 8938 | O  | HOH A | 1 | 4.025  | 46.889 | 2.392  | O |
| ATOM | 8939 | H1 | HOH A | 2 | 3.220  | 46.433 | 2.717  | H |
| ATOM | 8940 | H2 | HOH A | 3 | 4.001  | 47.813 | 2.716  | H |
| ATOM | 8941 | O  | HOH A | 1 | 4.016  | 46.891 | 24.495 | O |
| ATOM | 8942 | H1 | HOH A | 2 | 3.216  | 46.429 | 24.821 | H |
| ATOM | 8943 | H2 | HOH A | 3 | 3.983  | 47.817 | 24.817 | H |
| ATOM | 8944 | O  | HOH A | 1 | 3.990  | 46.920 | 46.653 | O |
| ATOM | 8945 | H1 | HOH A | 2 | 3.187  | 46.460 | 46.976 | H |
| ATOM | 8946 | H2 | HOH A | 3 | 3.958  | 47.846 | 46.972 | H |
| ATOM | 8947 | O  | HOH A | 1 | 26.625 | 47.046 | 2.378  | O |
| ATOM | 8948 | H1 | HOH A | 2 | 25.823 | 46.593 | 2.712  | H |
| ATOM | 8949 | H2 | HOH A | 3 | 26.604 | 47.972 | 2.697  | H |
| ATOM | 8950 | O  | HOH A | 1 | 26.614 | 46.936 | 24.549 | O |
| ATOM | 8951 | H1 | HOH A | 2 | 25.816 | 46.472 | 24.877 | H |
| ATOM | 8952 | H2 | HOH A | 3 | 26.582 | 47.860 | 24.874 | H |
| ATOM | 8953 | O  | HOH A | 1 | 26.612 | 46.917 | 46.628 | O |
| ATOM | 8954 | H1 | HOH A | 2 | 25.806 | 46.459 | 46.947 | H |
| ATOM | 8955 | H2 | HOH A | 3 | 26.581 | 47.843 | 46.947 | H |
| ATOM | 8956 | O  | HOH A | 1 | 49.206 | 47.084 | 2.336  | O |
| ATOM | 8957 | H1 | HOH A | 2 | 48.403 | 46.630 | 2.668  | H |
| ATOM | 8958 | H2 | HOH A | 3 | 49.187 | 48.009 | 2.659  | H |
| ATOM | 8959 | O  | HOH A | 1 | 49.237 | 46.929 | 24.450 | O |
| ATOM | 8960 | H1 | HOH A | 2 | 48.433 | 46.474 | 24.777 | H |
| ATOM | 8961 | H2 | HOH A | 3 | 49.214 | 47.853 | 24.773 | H |
| ATOM | 8962 | O  | HOH A | 1 | 49.237 | 46.946 | 46.587 | O |
| ATOM | 8963 | H1 | HOH A | 2 | 48.433 | 46.492 | 46.916 | H |
| ATOM | 8964 | H2 | HOH A | 3 | 49.215 | 47.872 | 46.909 | H |
| ATOM | 8965 | O  | HOH A | 1 | 8.512  | 46.914 | 2.427  | O |
| ATOM | 8966 | H1 | HOH A | 2 | 9.310  | 46.446 | 2.748  | H |

|      |      |    |       |   |        |        |        |   |
|------|------|----|-------|---|--------|--------|--------|---|
| ATOM | 8967 | H2 | HOH A | 3 | 7.725  | 46.437 | 2.764  | H |
| ATOM | 8968 | O  | HOH A | 1 | 8.498  | 46.897 | 24.547 | O |
| ATOM | 8969 | H1 | HOH A | 2 | 9.294  | 46.426 | 24.872 | H |
| ATOM | 8970 | H2 | HOH A | 3 | 7.708  | 46.425 | 24.886 | H |
| ATOM | 8971 | O  | HOH A | 1 | 8.472  | 46.937 | 46.694 | O |
| ATOM | 8972 | H1 | HOH A | 2 | 9.267  | 46.465 | 47.018 | H |
| ATOM | 8973 | H2 | HOH A | 3 | 7.681  | 46.462 | 47.024 | H |
| ATOM | 8974 | O  | HOH A | 1 | 31.099 | 47.123 | 2.405  | O |
| ATOM | 8975 | H1 | HOH A | 2 | 31.900 | 46.657 | 2.725  | H |
| ATOM | 8976 | H2 | HOH A | 3 | 30.314 | 46.640 | 2.738  | H |
| ATOM | 8977 | O  | HOH A | 1 | 31.118 | 46.956 | 24.563 | O |
| ATOM | 8978 | H1 | HOH A | 2 | 31.914 | 46.485 | 24.889 | H |
| ATOM | 8979 | H2 | HOH A | 3 | 30.328 | 46.477 | 24.891 | H |
| ATOM | 8980 | O  | HOH A | 1 | 31.117 | 46.943 | 46.646 | O |
| ATOM | 8981 | H1 | HOH A | 2 | 31.911 | 46.466 | 46.966 | H |
| ATOM | 8982 | H2 | HOH A | 3 | 30.326 | 46.472 | 46.982 | H |
| ATOM | 8983 | O  | HOH A | 1 | 53.699 | 47.052 | 2.361  | O |
| ATOM | 8984 | H1 | HOH A | 2 | 54.490 | 46.576 | 2.692  | H |
| ATOM | 8985 | H2 | HOH A | 3 | 52.904 | 46.585 | 2.693  | H |
| ATOM | 8986 | O  | HOH A | 1 | 53.725 | 46.926 | 24.483 | O |
| ATOM | 8987 | H1 | HOH A | 2 | 54.521 | 46.458 | 24.811 | H |
| ATOM | 8988 | H2 | HOH A | 3 | 52.935 | 46.452 | 24.817 | H |
| ATOM | 8989 | O  | HOH A | 1 | 53.713 | 46.976 | 46.619 | O |
| ATOM | 8990 | H1 | HOH A | 2 | 54.504 | 46.502 | 46.951 | H |
| ATOM | 8991 | H2 | HOH A | 3 | 52.918 | 46.505 | 46.944 | H |
| ATOM | 8992 | O  | HOH A | 1 | 13.029 | 46.930 | 2.385  | O |
| ATOM | 8993 | H1 | HOH A | 2 | 13.835 | 46.472 | 2.702  | H |
| ATOM | 8994 | H2 | HOH A | 3 | 13.044 | 46.927 | 1.405  | H |
| ATOM | 8995 | O  | HOH A | 1 | 13.014 | 46.900 | 24.535 | O |
| ATOM | 8996 | H1 | HOH A | 2 | 13.816 | 46.440 | 24.860 | H |
| ATOM | 8997 | H2 | HOH A | 3 | 13.037 | 46.892 | 23.555 | H |
| ATOM | 8998 | O  | HOH A | 1 | 12.998 | 46.919 | 46.657 | O |
| ATOM | 8999 | H1 | HOH A | 2 | 13.797 | 46.452 | 46.979 | H |
| ATOM | 9000 | H2 | HOH A | 3 | 13.012 | 46.905 | 45.678 | H |
| ATOM | 9001 | O  | HOH A | 1 | 35.625 | 47.149 | 2.363  | O |
| ATOM | 9002 | H1 | HOH A | 2 | 36.427 | 46.687 | 2.686  | H |

|      |      |    |       |   |        |        |        |   |
|------|------|----|-------|---|--------|--------|--------|---|
| ATOM | 9003 | H2 | HOH A | 3 | 35.639 | 47.132 | 1.384  | H |
| ATOM | 9004 | O  | HOH A | 1 | 35.636 | 46.950 | 24.505 | O |
| ATOM | 9005 | H1 | HOH A | 2 | 36.441 | 46.483 | 24.815 | H |
| ATOM | 9006 | H2 | HOH A | 3 | 35.641 | 46.942 | 23.525 | H |
| ATOM | 9007 | O  | HOH A | 1 | 35.639 | 46.930 | 46.595 | O |
| ATOM | 9008 | H1 | HOH A | 2 | 36.442 | 46.466 | 46.912 | H |
| ATOM | 9009 | H2 | HOH A | 3 | 35.646 | 46.913 | 45.616 | H |
| ATOM | 9010 | O  | HOH A | 1 | 58.226 | 46.990 | 2.345  | O |
| ATOM | 9011 | H1 | HOH A | 2 | 59.025 | 46.519 | 2.662  | H |
| ATOM | 9012 | H2 | HOH A | 3 | 58.240 | 46.982 | 1.365  | H |
| ATOM | 9013 | O  | HOH A | 1 | 58.241 | 46.921 | 24.447 | O |
| ATOM | 9014 | H1 | HOH A | 2 | 59.044 | 46.457 | 24.764 | H |
| ATOM | 9015 | H2 | HOH A | 3 | 58.256 | 46.915 | 23.467 | H |
| ATOM | 9016 | O  | HOH A | 1 | 58.224 | 46.961 | 46.602 | O |
| ATOM | 9017 | H1 | HOH A | 2 | 59.023 | 46.492 | 46.923 | H |
| ATOM | 9018 | H2 | HOH A | 3 | 58.235 | 46.943 | 45.623 | H |
| ATOM | 9019 | O  | HOH A | 1 | 17.552 | 46.966 | 2.385  | O |
| ATOM | 9020 | H1 | HOH A | 2 | 17.533 | 47.892 | 2.704  | H |
| ATOM | 9021 | H2 | HOH A | 3 | 17.553 | 46.982 | 1.405  | H |
| ATOM | 9022 | O  | HOH A | 1 | 17.534 | 46.908 | 24.541 | O |
| ATOM | 9023 | H1 | HOH A | 2 | 17.526 | 47.834 | 24.863 | H |
| ATOM | 9024 | H2 | HOH A | 3 | 17.533 | 46.928 | 23.562 | H |
| ATOM | 9025 | O  | HOH A | 1 | 17.537 | 46.921 | 46.664 | O |
| ATOM | 9026 | H1 | HOH A | 2 | 17.517 | 47.851 | 46.973 | H |
| ATOM | 9027 | H2 | HOH A | 3 | 17.534 | 46.927 | 45.684 | H |
| ATOM | 9028 | O  | HOH A | 1 | 40.151 | 47.129 | 2.351  | O |
| ATOM | 9029 | H1 | HOH A | 2 | 40.137 | 48.056 | 2.668  | H |
| ATOM | 9030 | H2 | HOH A | 3 | 40.155 | 47.143 | 1.371  | H |
| ATOM | 9031 | O  | HOH A | 1 | 40.174 | 46.947 | 24.489 | O |
| ATOM | 9032 | H1 | HOH A | 2 | 40.163 | 47.872 | 24.813 | H |
| ATOM | 9033 | H2 | HOH A | 3 | 40.180 | 46.970 | 23.509 | H |
| ATOM | 9034 | O  | HOH A | 1 | 40.177 | 46.940 | 46.588 | O |
| ATOM | 9035 | H1 | HOH A | 2 | 40.165 | 47.869 | 46.900 | H |
| ATOM | 9036 | H2 | HOH A | 3 | 40.185 | 46.951 | 45.608 | H |
| ATOM | 9037 | O  | HOH A | 1 | 62.754 | 46.959 | 2.373  | O |
| ATOM | 9038 | H1 | HOH A | 2 | 62.744 | 47.885 | 2.694  | H |

|      |      |    |       |   |        |        |        |   |
|------|------|----|-------|---|--------|--------|--------|---|
| ATOM | 9039 | H2 | HOH A | 3 | 62.758 | 46.978 | 1.393  | H |
| ATOM | 9040 | O  | HOH A | 1 | 62.766 | 46.904 | 24.461 | O |
| ATOM | 9041 | H1 | HOH A | 2 | 62.745 | 47.832 | 24.776 | H |
| ATOM | 9042 | H2 | HOH A | 3 | 62.769 | 46.918 | 23.481 | H |
| ATOM | 9043 | O  | HOH A | 1 | 62.740 | 46.954 | 46.633 | O |
| ATOM | 9044 | H1 | HOH A | 2 | 62.737 | 47.882 | 46.948 | H |
| ATOM | 9045 | H2 | HOH A | 3 | 62.743 | 46.966 | 45.653 | H |
| ATOM | 9046 | O  | HOH A | 1 | 1.734  | 27.335 | 2.375  | O |
| ATOM | 9047 | H1 | HOH A | 2 | 0.922  | 26.891 | 2.698  | H |
| ATOM | 9048 | H2 | HOH A | 3 | 1.731  | 28.254 | 2.715  | H |
| ATOM | 9049 | O  | HOH A | 1 | 1.720  | 27.317 | 24.496 | O |
| ATOM | 9050 | H1 | HOH A | 2 | 0.904  | 26.871 | 24.805 | H |
| ATOM | 9051 | H2 | HOH A | 3 | 1.714  | 28.234 | 24.842 | H |
| ATOM | 9052 | O  | HOH A | 1 | 1.700  | 27.350 | 46.656 | O |
| ATOM | 9053 | H1 | HOH A | 2 | 0.884  | 26.909 | 46.972 | H |
| ATOM | 9054 | H2 | HOH A | 3 | 1.698  | 28.269 | 46.996 | H |
| ATOM | 9055 | O  | HOH A | 1 | 24.332 | 27.457 | 2.385  | O |
| ATOM | 9056 | H1 | HOH A | 2 | 23.523 | 27.008 | 2.709  | H |
| ATOM | 9057 | H2 | HOH A | 3 | 24.324 | 28.376 | 2.725  | H |
| ATOM | 9058 | O  | HOH A | 1 | 24.314 | 27.345 | 24.544 | O |
| ATOM | 9059 | H1 | HOH A | 2 | 23.506 | 26.899 | 24.872 | H |
| ATOM | 9060 | H2 | HOH A | 3 | 24.314 | 28.263 | 24.887 | H |
| ATOM | 9061 | O  | HOH A | 1 | 24.316 | 27.356 | 46.642 | O |
| ATOM | 9062 | H1 | HOH A | 2 | 23.503 | 26.910 | 46.961 | H |
| ATOM | 9063 | H2 | HOH A | 3 | 24.312 | 28.274 | 46.986 | H |
| ATOM | 9064 | O  | HOH A | 1 | 46.915 | 27.527 | 2.336  | O |
| ATOM | 9065 | H1 | HOH A | 2 | 46.100 | 27.082 | 2.649  | H |
| ATOM | 9066 | H2 | HOH A | 3 | 46.906 | 28.447 | 2.674  | H |
| ATOM | 9067 | O  | HOH A | 1 | 46.944 | 27.366 | 24.452 | O |
| ATOM | 9068 | H1 | HOH A | 2 | 46.132 | 26.922 | 24.774 | H |
| ATOM | 9069 | H2 | HOH A | 3 | 46.940 | 28.286 | 24.787 | H |
| ATOM | 9070 | O  | HOH A | 1 | 46.942 | 27.373 | 46.591 | O |
| ATOM | 9071 | H1 | HOH A | 2 | 46.127 | 26.927 | 46.903 | H |
| ATOM | 9072 | H2 | HOH A | 3 | 46.936 | 28.290 | 46.935 | H |
| ATOM | 9073 | O  | HOH A | 1 | 6.273  | 27.312 | 2.420  | O |
| ATOM | 9074 | H1 | HOH A | 2 | 7.077  | 26.837 | 2.721  | H |



|      |      |    |       |   |        |        |        |   |
|------|------|----|-------|---|--------|--------|--------|---|
| ATOM | 9075 | H2 | HOH A | 3 | 6.274  | 27.318 | 1.440  | H |
| ATOM | 9076 | O  | HOH A | 1 | 6.256  | 27.300 | 24.525 | O |
| ATOM | 9077 | H1 | HOH A | 2 | 7.056  | 26.825 | 24.830 | H |
| ATOM | 9078 | H2 | HOH A | 3 | 6.254  | 27.294 | 23.545 | H |
| ATOM | 9079 | O  | HOH A | 1 | 6.236  | 27.348 | 46.691 | O |
| ATOM | 9080 | H1 | HOH A | 2 | 7.039  | 26.876 | 46.997 | H |
| ATOM | 9081 | H2 | HOH A | 3 | 6.238  | 27.342 | 45.711 | H |
| ATOM | 9082 | O  | HOH A | 1 | 28.854 | 27.506 | 2.403  | O |
| ATOM | 9083 | H1 | HOH A | 2 | 29.661 | 27.036 | 2.702  | H |
| ATOM | 9084 | H2 | HOH A | 3 | 28.846 | 27.499 | 1.423  | H |
| ATOM | 9085 | O  | HOH A | 1 | 28.865 | 27.351 | 24.582 | O |
| ATOM | 9086 | H1 | HOH A | 2 | 29.669 | 26.878 | 24.881 | H |
| ATOM | 9087 | H2 | HOH A | 3 | 28.859 | 27.351 | 23.602 | H |
| ATOM | 9088 | O  | HOH A | 1 | 28.855 | 27.353 | 46.670 | O |
| ATOM | 9089 | H1 | HOH A | 2 | 29.657 | 26.879 | 46.973 | H |
| ATOM | 9090 | H2 | HOH A | 3 | 28.848 | 27.341 | 45.690 | H |
| ATOM | 9091 | O  | HOH A | 1 | 51.450 | 27.477 | 2.368  | O |
| ATOM | 9092 | H1 | HOH A | 2 | 52.244 | 26.992 | 2.674  | H |
| ATOM | 9093 | H2 | HOH A | 3 | 51.452 | 27.474 | 1.388  | H |
| ATOM | 9094 | O  | HOH A | 1 | 51.483 | 27.341 | 24.484 | O |
| ATOM | 9095 | H1 | HOH A | 2 | 52.286 | 26.863 | 24.778 | H |
| ATOM | 9096 | H2 | HOH A | 3 | 51.477 | 27.349 | 23.504 | H |
| ATOM | 9097 | O  | HOH A | 1 | 51.478 | 27.379 | 46.623 | O |
| ATOM | 9098 | H1 | HOH A | 2 | 52.280 | 26.907 | 46.930 | H |
| ATOM | 9099 | H2 | HOH A | 3 | 51.480 | 27.374 | 45.643 | H |
| ATOM | 9100 | O  | HOH A | 1 | 10.768 | 27.337 | 2.377  | O |
| ATOM | 9101 | H1 | HOH A | 2 | 11.573 | 26.889 | 2.709  | H |
| ATOM | 9102 | H2 | HOH A | 3 | 10.785 | 28.265 | 2.692  | H |
| ATOM | 9103 | O  | HOH A | 1 | 10.738 | 27.312 | 24.522 | O |
| ATOM | 9104 | H1 | HOH A | 2 | 11.542 | 26.861 | 24.855 | H |
| ATOM | 9105 | H2 | HOH A | 3 | 10.754 | 28.237 | 24.844 | H |
| ATOM | 9106 | O  | HOH A | 1 | 10.726 | 27.331 | 46.648 | O |
| ATOM | 9107 | H1 | HOH A | 2 | 11.534 | 26.882 | 46.974 | H |
| ATOM | 9108 | H2 | HOH A | 3 | 10.745 | 28.258 | 46.968 | H |
| ATOM | 9109 | O  | HOH A | 1 | 33.334 | 27.542 | 2.355  | O |
| ATOM | 9110 | H1 | HOH A | 2 | 34.137 | 27.090 | 2.689  | H |

|      |      |    |       |   |        |        |        |   |
|------|------|----|-------|---|--------|--------|--------|---|
| ATOM | 9111 | H2 | HOH A | 3 | 33.352 | 28.468 | 2.677  | H |
| ATOM | 9112 | O  | HOH A | 1 | 33.369 | 27.362 | 24.514 | O |
| ATOM | 9113 | H1 | HOH A | 2 | 34.177 | 26.913 | 24.841 | H |
| ATOM | 9114 | H2 | HOH A | 3 | 33.388 | 28.289 | 24.832 | H |
| ATOM | 9115 | O  | HOH A | 1 | 33.363 | 27.346 | 46.604 | O |
| ATOM | 9116 | H1 | HOH A | 2 | 34.172 | 26.896 | 46.924 | H |
| ATOM | 9117 | H2 | HOH A | 3 | 33.387 | 28.273 | 46.920 | H |
| ATOM | 9118 | O  | HOH A | 1 | 55.939 | 27.434 | 2.334  | O |
| ATOM | 9119 | H1 | HOH A | 2 | 56.739 | 26.974 | 2.665  | H |
| ATOM | 9120 | H2 | HOH A | 3 | 55.967 | 28.359 | 2.656  | H |
| ATOM | 9121 | O  | HOH A | 1 | 55.977 | 27.338 | 24.439 | O |
| ATOM | 9122 | H1 | HOH A | 2 | 56.781 | 26.887 | 24.773 | H |
| ATOM | 9123 | H2 | HOH A | 3 | 55.994 | 28.264 | 24.759 | H |
| ATOM | 9124 | O  | HOH A | 1 | 55.962 | 27.381 | 46.598 | O |
| ATOM | 9125 | H1 | HOH A | 2 | 56.767 | 26.930 | 46.929 | H |
| ATOM | 9126 | H2 | HOH A | 3 | 55.984 | 28.309 | 46.912 | H |
| ATOM | 9127 | O  | HOH A | 1 | 15.330 | 27.356 | 2.357  | O |
| ATOM | 9128 | H1 | HOH A | 2 | 14.519 | 26.918 | 2.690  | H |
| ATOM | 9129 | H2 | HOH A | 3 | 15.326 | 28.283 | 2.676  | H |
| ATOM | 9130 | O  | HOH A | 1 | 15.315 | 27.299 | 24.528 | O |
| ATOM | 9131 | H1 | HOH A | 2 | 14.503 | 26.858 | 24.855 | H |
| ATOM | 9132 | H2 | HOH A | 3 | 15.308 | 28.224 | 24.850 | H |
| ATOM | 9133 | O  | HOH A | 1 | 15.299 | 27.329 | 46.625 | O |
| ATOM | 9134 | H1 | HOH A | 2 | 14.488 | 26.888 | 46.954 | H |
| ATOM | 9135 | H2 | HOH A | 3 | 15.292 | 28.255 | 46.947 | H |
| ATOM | 9136 | O  | HOH A | 1 | 37.908 | 27.535 | 2.331  | O |
| ATOM | 9137 | H1 | HOH A | 2 | 37.094 | 27.100 | 2.661  | H |
| ATOM | 9138 | H2 | HOH A | 3 | 37.909 | 28.461 | 2.652  | H |
| ATOM | 9139 | O  | HOH A | 1 | 37.945 | 27.359 | 24.472 | O |
| ATOM | 9140 | H1 | HOH A | 2 | 37.131 | 26.927 | 24.804 | H |
| ATOM | 9141 | H2 | HOH A | 3 | 37.944 | 28.289 | 24.783 | H |
| ATOM | 9142 | O  | HOH A | 1 | 37.945 | 27.341 | 46.570 | O |
| ATOM | 9143 | H1 | HOH A | 2 | 37.131 | 26.908 | 46.903 | H |
| ATOM | 9144 | H2 | HOH A | 3 | 37.949 | 28.266 | 46.893 | H |
| ATOM | 9145 | O  | HOH A | 1 | 60.520 | 27.376 | 2.328  | O |
| ATOM | 9146 | H1 | HOH A | 2 | 59.701 | 26.945 | 2.648  | H |

|      |      |    |       |   |        |        |        |   |
|------|------|----|-------|---|--------|--------|--------|---|
| ATOM | 9147 | H2 | HOH A | 3 | 60.519 | 28.303 | 2.647  | H |
| ATOM | 9148 | O  | HOH A | 1 | 60.535 | 27.309 | 24.437 | O |
| ATOM | 9149 | H1 | HOH A | 2 | 59.719 | 26.877 | 24.765 | H |
| ATOM | 9150 | H2 | HOH A | 3 | 60.538 | 28.235 | 24.757 | H |
| ATOM | 9151 | O  | HOH A | 1 | 60.530 | 27.367 | 46.602 | O |
| ATOM | 9152 | H1 | HOH A | 2 | 59.716 | 26.930 | 46.930 | H |
| ATOM | 9153 | H2 | HOH A | 3 | 60.530 | 28.291 | 46.927 | H |
| ATOM | 9154 | O  | HOH A | 1 | 19.815 | 27.418 | 2.403  | O |
| ATOM | 9155 | H1 | HOH A | 2 | 19.007 | 26.980 | 2.742  | H |
| ATOM | 9156 | H2 | HOH A | 3 | 19.812 | 28.346 | 2.718  | H |
| ATOM | 9157 | O  | HOH A | 1 | 19.808 | 27.324 | 24.565 | O |
| ATOM | 9158 | H1 | HOH A | 2 | 18.997 | 26.895 | 24.910 | H |
| ATOM | 9159 | H2 | HOH A | 3 | 19.814 | 28.254 | 24.875 | H |
| ATOM | 9160 | O  | HOH A | 1 | 19.792 | 27.345 | 46.675 | O |
| ATOM | 9161 | H1 | HOH A | 2 | 18.980 | 26.913 | 47.013 | H |
| ATOM | 9162 | H2 | HOH A | 3 | 19.789 | 28.276 | 46.982 | H |
| ATOM | 9163 | O  | HOH A | 1 | 42.401 | 27.537 | 2.363  | O |
| ATOM | 9164 | H1 | HOH A | 2 | 41.586 | 27.113 | 2.704  | H |
| ATOM | 9165 | H2 | HOH A | 3 | 42.407 | 28.469 | 2.667  | H |
| ATOM | 9166 | O  | HOH A | 1 | 42.450 | 27.361 | 24.489 | O |
| ATOM | 9167 | H1 | HOH A | 2 | 41.635 | 26.936 | 24.829 | H |
| ATOM | 9168 | H2 | HOH A | 3 | 42.460 | 28.290 | 24.804 | H |
| ATOM | 9169 | O  | HOH A | 1 | 42.440 | 27.361 | 46.612 | O |
| ATOM | 9170 | H1 | HOH A | 2 | 41.624 | 26.934 | 46.947 | H |
| ATOM | 9171 | H2 | HOH A | 3 | 42.447 | 28.289 | 46.926 | H |
| ATOM | 9172 | O  | HOH A | 1 | 65.015 | 27.358 | 2.398  | O |
| ATOM | 9173 | H1 | HOH A | 2 | 64.201 | 26.929 | 2.736  | H |
| ATOM | 9174 | H2 | HOH A | 3 | 65.020 | 28.287 | 2.709  | H |
| ATOM | 9175 | O  | HOH A | 1 | 65.019 | 27.312 | 24.494 | O |
| ATOM | 9176 | H1 | HOH A | 2 | 64.208 | 26.885 | 24.840 | H |
| ATOM | 9177 | H2 | HOH A | 3 | 65.027 | 28.242 | 24.802 | H |
| ATOM | 9178 | O  | HOH A | 1 | 65.002 | 27.381 | 46.647 | O |
| ATOM | 9179 | H1 | HOH A | 2 | 64.190 | 26.952 | 46.988 | H |
| ATOM | 9180 | H2 | HOH A | 3 | 65.009 | 28.309 | 46.960 | H |
| ATOM | 9181 | O  | HOH A | 1 | 22.159 | 31.358 | 2.380  | O |
| ATOM | 9182 | H1 | HOH A | 2 | 21.350 | 30.913 | 2.707  | H |

|      |      |    |       |   |        |        |        |   |
|------|------|----|-------|---|--------|--------|--------|---|
| ATOM | 9183 | H2 | HOH A | 3 | 22.155 | 32.279 | 2.714  | H |
| ATOM | 9184 | O  | HOH A | 1 | 22.147 | 31.261 | 24.543 | O |
| ATOM | 9185 | H1 | HOH A | 2 | 21.340 | 30.816 | 24.876 | H |
| ATOM | 9186 | H2 | HOH A | 3 | 22.140 | 32.185 | 24.872 | H |
| ATOM | 9187 | O  | HOH A | 1 | 22.143 | 31.271 | 46.646 | O |
| ATOM | 9188 | H1 | HOH A | 2 | 21.335 | 30.825 | 46.976 | H |
| ATOM | 9189 | H2 | HOH A | 3 | 22.136 | 32.193 | 46.977 | H |
| ATOM | 9190 | O  | HOH A | 1 | 44.733 | 31.458 | 2.324  | O |
| ATOM | 9191 | H1 | HOH A | 2 | 43.921 | 31.015 | 2.647  | H |
| ATOM | 9192 | H2 | HOH A | 3 | 44.727 | 32.381 | 2.654  | H |
| ATOM | 9193 | O  | HOH A | 1 | 44.791 | 31.292 | 24.447 | O |
| ATOM | 9194 | H1 | HOH A | 2 | 43.979 | 30.849 | 24.771 | H |
| ATOM | 9195 | H2 | HOH A | 3 | 44.785 | 32.215 | 24.777 | H |
| ATOM | 9196 | O  | HOH A | 1 | 44.790 | 31.298 | 46.576 | O |
| ATOM | 9197 | H1 | HOH A | 2 | 43.982 | 30.848 | 46.901 | H |
| ATOM | 9198 | H2 | HOH A | 3 | 44.777 | 32.220 | 46.907 | H |
| ATOM | 9199 | O  | HOH A | 1 | 67.366 | 31.257 | 2.370  | O |
| ATOM | 9200 | H1 | HOH A | 2 | 66.551 | 30.814 | 2.685  | H |
| ATOM | 9201 | H2 | HOH A | 3 | 67.357 | 32.179 | 2.701  | H |
| ATOM | 9202 | O  | HOH A | 1 | 67.359 | 31.239 | 24.475 | O |
| ATOM | 9203 | H1 | HOH A | 2 | 66.548 | 30.799 | 24.804 | H |
| ATOM | 9204 | H2 | HOH A | 3 | 67.356 | 32.163 | 24.800 | H |
| ATOM | 9205 | O  | HOH A | 1 | 67.339 | 31.288 | 46.624 | O |
| ATOM | 9206 | H1 | HOH A | 2 | 66.529 | 30.841 | 46.947 | H |
| ATOM | 9207 | H2 | HOH A | 3 | 67.333 | 32.208 | 46.962 | H |
| ATOM | 9208 | O  | HOH A | 1 | 4.043  | 31.256 | 2.422  | O |
| ATOM | 9209 | H1 | HOH A | 2 | 3.236  | 30.794 | 2.731  | H |
| ATOM | 9210 | H2 | HOH A | 3 | 4.033  | 31.261 | 1.442  | H |
| ATOM | 9211 | O  | HOH A | 1 | 4.039  | 31.236 | 24.543 | O |
| ATOM | 9212 | H1 | HOH A | 2 | 3.238  | 30.769 | 24.861 | H |
| ATOM | 9213 | H2 | HOH A | 3 | 4.026  | 31.229 | 23.563 | H |
| ATOM | 9214 | O  | HOH A | 1 | 4.016  | 31.278 | 46.691 | O |
| ATOM | 9215 | H1 | HOH A | 2 | 3.214  | 30.814 | 47.010 | H |
| ATOM | 9216 | H2 | HOH A | 3 | 4.002  | 31.269 | 45.711 | H |
| ATOM | 9217 | O  | HOH A | 1 | 26.625 | 31.430 | 2.424  | O |
| ATOM | 9218 | H1 | HOH A | 2 | 25.825 | 30.963 | 2.745  | H |

|      |      |    |       |   |        |        |        |   |
|------|------|----|-------|---|--------|--------|--------|---|
| ATOM | 9219 | H2 | HOH A | 3 | 26.609 | 31.417 | 1.444  | H |
| ATOM | 9220 | O  | HOH A | 1 | 26.653 | 31.285 | 24.588 | O |
| ATOM | 9221 | H1 | HOH A | 2 | 25.853 | 30.816 | 24.905 | H |
| ATOM | 9222 | H2 | HOH A | 3 | 26.636 | 31.283 | 23.608 | H |
| ATOM | 9223 | O  | HOH A | 1 | 26.636 | 31.285 | 46.671 | O |
| ATOM | 9224 | H1 | HOH A | 2 | 25.834 | 30.819 | 46.987 | H |
| ATOM | 9225 | H2 | HOH A | 3 | 26.627 | 31.272 | 45.691 | H |
| ATOM | 9226 | O  | HOH A | 1 | 49.229 | 31.434 | 2.369  | O |
| ATOM | 9227 | H1 | HOH A | 2 | 48.420 | 30.980 | 2.684  | H |
| ATOM | 9228 | H2 | HOH A | 3 | 49.215 | 31.435 | 1.390  | H |
| ATOM | 9229 | O  | HOH A | 1 | 49.256 | 31.287 | 24.476 | O |
| ATOM | 9230 | H1 | HOH A | 2 | 48.455 | 30.819 | 24.793 | H |
| ATOM | 9231 | H2 | HOH A | 3 | 49.238 | 31.288 | 23.496 | H |
| ATOM | 9232 | O  | HOH A | 1 | 49.263 | 31.310 | 46.623 | O |
| ATOM | 9233 | H1 | HOH A | 2 | 48.465 | 30.839 | 46.942 | H |
| ATOM | 9234 | H2 | HOH A | 3 | 49.252 | 31.297 | 45.643 | H |
| ATOM | 9235 | O  | HOH A | 1 | 8.557  | 31.252 | 2.393  | O |
| ATOM | 9236 | H1 | HOH A | 2 | 7.748  | 30.789 | 2.693  | H |
| ATOM | 9237 | H2 | HOH A | 3 | 8.552  | 31.268 | 1.413  | H |
| ATOM | 9238 | O  | HOH A | 1 | 8.532  | 31.232 | 24.530 | O |
| ATOM | 9239 | H1 | HOH A | 2 | 7.728  | 30.756 | 24.825 | H |
| ATOM | 9240 | H2 | HOH A | 3 | 8.536  | 31.242 | 23.550 | H |
| ATOM | 9241 | O  | HOH A | 1 | 8.516  | 31.264 | 46.673 | O |
| ATOM | 9242 | H1 | HOH A | 2 | 7.708  | 30.798 | 46.974 | H |
| ATOM | 9243 | H2 | HOH A | 3 | 8.512  | 31.273 | 45.693 | H |
| ATOM | 9244 | O  | HOH A | 1 | 31.132 | 31.459 | 2.404  | O |
| ATOM | 9245 | H1 | HOH A | 2 | 30.327 | 30.984 | 2.699  | H |
| ATOM | 9246 | H2 | HOH A | 3 | 31.140 | 31.461 | 1.424  | H |
| ATOM | 9247 | O  | HOH A | 1 | 31.153 | 31.287 | 24.550 | O |
| ATOM | 9248 | H1 | HOH A | 2 | 30.345 | 30.821 | 24.850 | H |
| ATOM | 9249 | H2 | HOH A | 3 | 31.149 | 31.298 | 23.570 | H |
| ATOM | 9250 | O  | HOH A | 1 | 31.154 | 31.271 | 46.642 | O |
| ATOM | 9251 | H1 | HOH A | 2 | 30.345 | 30.811 | 46.949 | H |
| ATOM | 9252 | H2 | HOH A | 3 | 31.153 | 31.264 | 45.662 | H |
| ATOM | 9253 | O  | HOH A | 1 | 53.739 | 31.395 | 2.346  | O |
| ATOM | 9254 | H1 | HOH A | 2 | 52.927 | 30.930 | 2.639  | H |

|      |      |    |       |   |        |        |        |   |
|------|------|----|-------|---|--------|--------|--------|---|
| ATOM | 9255 | H2 | HOH A | 3 | 53.746 | 31.403 | 1.366  | H |
| ATOM | 9256 | O  | HOH A | 1 | 53.760 | 31.270 | 24.457 | O |
| ATOM | 9257 | H1 | HOH A | 2 | 52.949 | 30.804 | 24.751 | H |
| ATOM | 9258 | H2 | HOH A | 3 | 53.765 | 31.281 | 23.477 | H |
| ATOM | 9259 | O  | HOH A | 1 | 53.757 | 31.305 | 46.611 | O |
| ATOM | 9260 | H1 | HOH A | 2 | 52.952 | 30.836 | 46.916 | H |
| ATOM | 9261 | H2 | HOH A | 3 | 53.757 | 31.301 | 45.631 | H |
| ATOM | 9262 | O  | HOH A | 1 | 13.087 | 31.261 | 2.390  | O |
| ATOM | 9263 | H1 | HOH A | 2 | 13.905 | 30.825 | 2.709  | H |
| ATOM | 9264 | H2 | HOH A | 3 | 13.079 | 32.178 | 2.734  | H |
| ATOM | 9265 | O  | HOH A | 1 | 13.053 | 31.225 | 24.543 | O |
| ATOM | 9266 | H1 | HOH A | 2 | 13.864 | 30.785 | 24.873 | H |
| ATOM | 9267 | H2 | HOH A | 3 | 13.041 | 32.141 | 24.891 | H |
| ATOM | 9268 | O  | HOH A | 1 | 13.039 | 31.239 | 46.668 | O |
| ATOM | 9269 | H1 | HOH A | 2 | 13.855 | 30.805 | 46.992 | H |
| ATOM | 9270 | H2 | HOH A | 3 | 13.030 | 32.159 | 47.006 | H |
| ATOM | 9271 | O  | HOH A | 1 | 35.648 | 31.456 | 2.364  | O |
| ATOM | 9272 | H1 | HOH A | 2 | 36.463 | 31.021 | 2.690  | H |
| ATOM | 9273 | H2 | HOH A | 3 | 35.639 | 32.376 | 2.702  | H |
| ATOM | 9274 | O  | HOH A | 1 | 35.680 | 31.286 | 24.497 | O |
| ATOM | 9275 | H1 | HOH A | 2 | 36.496 | 30.852 | 24.823 | H |
| ATOM | 9276 | H2 | HOH A | 3 | 35.672 | 32.206 | 24.834 | H |
| ATOM | 9277 | O  | HOH A | 1 | 35.684 | 31.255 | 46.608 | O |
| ATOM | 9278 | H1 | HOH A | 2 | 36.502 | 30.819 | 46.928 | H |
| ATOM | 9279 | H2 | HOH A | 3 | 35.681 | 32.175 | 46.945 | H |
| ATOM | 9280 | O  | HOH A | 1 | 58.269 | 31.317 | 2.339  | O |
| ATOM | 9281 | H1 | HOH A | 2 | 59.077 | 30.875 | 2.674  | H |
| ATOM | 9282 | H2 | HOH A | 3 | 58.264 | 32.236 | 2.678  | H |
| ATOM | 9283 | O  | HOH A | 1 | 58.273 | 31.235 | 24.444 | O |
| ATOM | 9284 | H1 | HOH A | 2 | 59.081 | 30.797 | 24.783 | H |
| ATOM | 9285 | H2 | HOH A | 3 | 58.265 | 32.156 | 24.778 | H |
| ATOM | 9286 | O  | HOH A | 1 | 58.277 | 31.290 | 46.617 | O |
| ATOM | 9287 | H1 | HOH A | 2 | 59.089 | 30.852 | 46.947 | H |
| ATOM | 9288 | H2 | HOH A | 3 | 58.271 | 32.210 | 46.955 | H |
| ATOM | 9289 | O  | HOH A | 1 | 17.619 | 31.277 | 2.380  | O |
| ATOM | 9290 | H1 | HOH A | 2 | 17.609 | 32.201 | 2.709  | H |

|      |      |    |       |   |        |        |        |   |
|------|------|----|-------|---|--------|--------|--------|---|
| ATOM | 9291 | H2 | HOH A | 3 | 17.605 | 31.304 | 1.401  | H |
| ATOM | 9292 | O  | HOH A | 1 | 17.602 | 31.199 | 24.552 | O |
| ATOM | 9293 | H1 | HOH A | 2 | 17.595 | 32.124 | 24.875 | H |
| ATOM | 9294 | H2 | HOH A | 3 | 17.591 | 31.220 | 23.573 | H |
| ATOM | 9295 | O  | HOH A | 1 | 17.595 | 31.229 | 46.661 | O |
| ATOM | 9296 | H1 | HOH A | 2 | 17.584 | 32.155 | 46.980 | H |
| ATOM | 9297 | H2 | HOH A | 3 | 17.570 | 31.245 | 45.682 | H |
| ATOM | 9298 | O  | HOH A | 1 | 40.196 | 31.433 | 2.347  | O |
| ATOM | 9299 | H1 | HOH A | 2 | 40.195 | 32.359 | 2.667  | H |
| ATOM | 9300 | H2 | HOH A | 3 | 40.181 | 31.451 | 1.367  | H |
| ATOM | 9301 | O  | HOH A | 1 | 40.243 | 31.260 | 24.482 | O |
| ATOM | 9302 | H1 | HOH A | 2 | 40.232 | 32.182 | 24.814 | H |
| ATOM | 9303 | H2 | HOH A | 3 | 40.231 | 31.291 | 23.502 | H |
| ATOM | 9304 | O  | HOH A | 1 | 40.248 | 31.238 | 46.583 | O |
| ATOM | 9305 | H1 | HOH A | 2 | 40.234 | 32.164 | 46.905 | H |
| ATOM | 9306 | H2 | HOH A | 3 | 40.234 | 31.259 | 45.603 | H |
| ATOM | 9307 | O  | HOH A | 1 | 62.814 | 31.263 | 2.357  | O |
| ATOM | 9308 | H1 | HOH A | 2 | 62.804 | 32.186 | 2.684  | H |
| ATOM | 9309 | H2 | HOH A | 3 | 62.803 | 31.288 | 1.377  | H |
| ATOM | 9310 | O  | HOH A | 1 | 62.821 | 31.194 | 24.457 | O |
| ATOM | 9311 | H1 | HOH A | 2 | 62.819 | 32.117 | 24.788 | H |
| ATOM | 9312 | H2 | HOH A | 3 | 62.807 | 31.224 | 23.478 | H |
| ATOM | 9313 | O  | HOH A | 1 | 62.813 | 31.266 | 46.639 | O |
| ATOM | 9314 | H1 | HOH A | 2 | 62.805 | 32.191 | 46.964 | H |
| ATOM | 9315 | H2 | HOH A | 3 | 62.799 | 31.289 | 45.659 | H |
| ATOM | 9316 | O  | HOH A | 1 | 1.764  | 35.177 | 2.364  | O |
| ATOM | 9317 | H1 | HOH A | 2 | 2.564  | 34.718 | 2.694  | H |
| ATOM | 9318 | H2 | HOH A | 3 | 1.789  | 35.164 | 1.384  | H |
| ATOM | 9319 | O  | HOH A | 1 | 1.756  | 35.162 | 24.475 | O |
| ATOM | 9320 | H1 | HOH A | 2 | 2.561  | 34.710 | 24.804 | H |
| ATOM | 9321 | H2 | HOH A | 3 | 1.773  | 35.136 | 23.496 | H |
| ATOM | 9322 | O  | HOH A | 1 | 1.733  | 35.208 | 46.618 | O |
| ATOM | 9323 | H1 | HOH A | 2 | 2.539  | 34.753 | 46.939 | H |
| ATOM | 9324 | H2 | HOH A | 3 | 1.747  | 35.193 | 45.638 | H |
| ATOM | 9325 | O  | HOH A | 1 | 24.346 | 35.332 | 2.386  | O |
| ATOM | 9326 | H1 | HOH A | 2 | 25.156 | 34.882 | 2.705  | H |

|      |      |    |       |   |        |        |        |   |
|------|------|----|-------|---|--------|--------|--------|---|
| ATOM | 9327 | H2 | HOH A | 3 | 24.356 | 35.315 | 1.407  | H |
| ATOM | 9328 | O  | HOH A | 1 | 24.360 | 35.200 | 24.544 | O |
| ATOM | 9329 | H1 | HOH A | 2 | 25.171 | 34.747 | 24.859 | H |
| ATOM | 9330 | H2 | HOH A | 3 | 24.371 | 35.191 | 23.564 | H |
| ATOM | 9331 | O  | HOH A | 1 | 24.336 | 35.200 | 46.626 | O |
| ATOM | 9332 | H1 | HOH A | 2 | 25.139 | 34.741 | 46.949 | H |
| ATOM | 9333 | H2 | HOH A | 3 | 24.350 | 35.181 | 45.646 | H |
| ATOM | 9334 | O  | HOH A | 1 | 46.945 | 35.373 | 2.314  | O |
| ATOM | 9335 | H1 | HOH A | 2 | 47.749 | 34.910 | 2.631  | H |
| ATOM | 9336 | H2 | HOH A | 3 | 46.957 | 35.362 | 1.334  | H |
| ATOM | 9337 | O  | HOH A | 1 | 46.983 | 35.220 | 24.429 | O |
| ATOM | 9338 | H1 | HOH A | 2 | 47.789 | 34.762 | 24.747 | H |
| ATOM | 9339 | H2 | HOH A | 3 | 46.996 | 35.210 | 23.449 | H |
| ATOM | 9340 | O  | HOH A | 1 | 46.972 | 35.233 | 46.566 | O |
| ATOM | 9341 | H1 | HOH A | 2 | 47.771 | 34.770 | 46.894 | H |
| ATOM | 9342 | H2 | HOH A | 3 | 46.987 | 35.206 | 45.586 | H |
| ATOM | 9343 | O  | HOH A | 1 | 6.266  | 35.142 | 2.381  | O |
| ATOM | 9344 | H1 | HOH A | 2 | 7.072  | 34.698 | 2.717  | H |
| ATOM | 9345 | H2 | HOH A | 3 | 6.269  | 36.065 | 2.712  | H |
| ATOM | 9346 | O  | HOH A | 1 | 6.250  | 35.153 | 24.497 | O |
| ATOM | 9347 | H1 | HOH A | 2 | 7.052  | 34.707 | 24.840 | H |
| ATOM | 9348 | H2 | HOH A | 3 | 6.251  | 36.076 | 24.829 | H |
| ATOM | 9349 | O  | HOH A | 1 | 6.234  | 35.180 | 46.643 | O |
| ATOM | 9350 | H1 | HOH A | 2 | 7.043  | 34.742 | 46.980 | H |
| ATOM | 9351 | H2 | HOH A | 3 | 6.232  | 36.105 | 46.968 | H |
| ATOM | 9352 | O  | HOH A | 1 | 28.849 | 35.359 | 2.379  | O |
| ATOM | 9353 | H1 | HOH A | 2 | 29.659 | 34.918 | 2.712  | H |
| ATOM | 9354 | H2 | HOH A | 3 | 28.851 | 36.282 | 2.706  | H |
| ATOM | 9355 | O  | HOH A | 1 | 28.863 | 35.199 | 24.525 | O |
| ATOM | 9356 | H1 | HOH A | 2 | 29.673 | 34.760 | 24.857 | H |
| ATOM | 9357 | H2 | HOH A | 3 | 28.864 | 36.123 | 24.851 | H |
| ATOM | 9358 | O  | HOH A | 1 | 28.868 | 35.184 | 46.622 | O |
| ATOM | 9359 | H1 | HOH A | 2 | 29.678 | 34.741 | 46.951 | H |
| ATOM | 9360 | H2 | HOH A | 3 | 28.879 | 36.111 | 46.939 | H |
| ATOM | 9361 | O  | HOH A | 1 | 51.464 | 35.315 | 2.315  | O |
| ATOM | 9362 | H1 | HOH A | 2 | 52.269 | 34.870 | 2.651  | H |



|      |      |    |       |   |        |        |        |   |
|------|------|----|-------|---|--------|--------|--------|---|
| ATOM | 9363 | H2 | HOH A | 3 | 51.467 | 36.237 | 2.647  | H |
| ATOM | 9364 | O  | HOH A | 1 | 51.480 | 35.180 | 24.418 | O |
| ATOM | 9365 | H1 | HOH A | 2 | 52.287 | 34.738 | 24.755 | H |
| ATOM | 9366 | H2 | HOH A | 3 | 51.485 | 36.105 | 24.743 | H |
| ATOM | 9367 | O  | HOH A | 1 | 51.472 | 35.207 | 46.576 | O |
| ATOM | 9368 | H1 | HOH A | 2 | 52.282 | 34.767 | 46.911 | H |
| ATOM | 9369 | H2 | HOH A | 3 | 51.472 | 36.130 | 46.904 | H |
| ATOM | 9370 | O  | HOH A | 1 | 10.791 | 35.198 | 2.383  | O |
| ATOM | 9371 | H1 | HOH A | 2 | 11.590 | 34.731 | 2.706  | H |
| ATOM | 9372 | H2 | HOH A | 3 | 10.806 | 35.180 | 1.403  | H |
| ATOM | 9373 | O  | HOH A | 1 | 10.764 | 35.170 | 24.534 | O |
| ATOM | 9374 | H1 | HOH A | 2 | 11.559 | 34.701 | 24.864 | H |
| ATOM | 9375 | H2 | HOH A | 3 | 10.787 | 35.151 | 23.554 | H |
| ATOM | 9376 | O  | HOH A | 1 | 10.758 | 35.210 | 46.657 | O |
| ATOM | 9377 | H1 | HOH A | 2 | 11.555 | 34.736 | 46.973 | H |
| ATOM | 9378 | H2 | HOH A | 3 | 10.764 | 35.195 | 45.678 | H |
| ATOM | 9379 | O  | HOH A | 1 | 33.362 | 35.400 | 2.380  | O |
| ATOM | 9380 | H1 | HOH A | 2 | 34.161 | 34.932 | 2.701  | H |
| ATOM | 9381 | H2 | HOH A | 3 | 33.371 | 35.380 | 1.400  | H |
| ATOM | 9382 | O  | HOH A | 1 | 33.388 | 35.234 | 24.507 | O |
| ATOM | 9383 | H1 | HOH A | 2 | 34.191 | 34.763 | 24.814 | H |
| ATOM | 9384 | H2 | HOH A | 3 | 33.386 | 35.221 | 23.527 | H |
| ATOM | 9385 | O  | HOH A | 1 | 33.405 | 35.225 | 46.606 | O |
| ATOM | 9386 | H1 | HOH A | 2 | 34.203 | 34.758 | 46.929 | H |
| ATOM | 9387 | H2 | HOH A | 3 | 33.417 | 35.203 | 45.626 | H |
| ATOM | 9388 | O  | HOH A | 1 | 55.986 | 35.310 | 2.323  | O |
| ATOM | 9389 | H1 | HOH A | 2 | 56.778 | 34.830 | 2.644  | H |
| ATOM | 9390 | H2 | HOH A | 3 | 56.002 | 35.299 | 1.344  | H |
| ATOM | 9391 | O  | HOH A | 1 | 56.006 | 35.206 | 24.449 | O |
| ATOM | 9392 | H1 | HOH A | 2 | 56.803 | 34.731 | 24.763 | H |
| ATOM | 9393 | H2 | HOH A | 3 | 56.013 | 35.196 | 23.469 | H |
| ATOM | 9394 | O  | HOH A | 1 | 55.977 | 35.251 | 46.602 | O |
| ATOM | 9395 | H1 | HOH A | 2 | 56.773 | 34.779 | 46.924 | H |
| ATOM | 9396 | H2 | HOH A | 3 | 55.991 | 35.234 | 45.622 | H |
| ATOM | 9397 | O  | HOH A | 1 | 15.307 | 35.174 | 2.406  | O |
| ATOM | 9398 | H1 | HOH A | 2 | 16.117 | 34.711 | 2.705  | H |

|      |      |    |       |   |        |        |        |   |
|------|------|----|-------|---|--------|--------|--------|---|
| ATOM | 9399 | H2 | HOH A | 3 | 15.304 | 35.176 | 1.426  | H |
| ATOM | 9400 | O  | HOH A | 1 | 15.278 | 35.122 | 24.578 | O |
| ATOM | 9401 | H1 | HOH A | 2 | 16.082 | 34.649 | 24.879 | H |
| ATOM | 9402 | H2 | HOH A | 3 | 15.285 | 35.137 | 23.598 | H |
| ATOM | 9403 | O  | HOH A | 1 | 15.267 | 35.135 | 46.669 | O |
| ATOM | 9404 | H1 | HOH A | 2 | 16.071 | 34.665 | 46.975 | H |
| ATOM | 9405 | H2 | HOH A | 3 | 15.276 | 35.144 | 45.689 | H |
| ATOM | 9406 | O  | HOH A | 1 | 37.881 | 35.362 | 2.379  | O |
| ATOM | 9407 | H1 | HOH A | 2 | 38.689 | 34.895 | 2.678  | H |
| ATOM | 9408 | H2 | HOH A | 3 | 37.883 | 35.374 | 1.399  | H |
| ATOM | 9409 | O  | HOH A | 1 | 37.925 | 35.183 | 24.513 | O |
| ATOM | 9410 | H1 | HOH A | 2 | 38.729 | 34.708 | 24.810 | H |
| ATOM | 9411 | H2 | HOH A | 3 | 37.923 | 35.193 | 23.533 | H |
| ATOM | 9412 | O  | HOH A | 1 | 37.910 | 35.158 | 46.615 | O |
| ATOM | 9413 | H1 | HOH A | 2 | 38.714 | 34.686 | 46.917 | H |
| ATOM | 9414 | H2 | HOH A | 3 | 37.909 | 35.159 | 45.635 | H |
| ATOM | 9415 | O  | HOH A | 1 | 60.506 | 35.201 | 2.377  | O |
| ATOM | 9416 | H1 | HOH A | 2 | 61.308 | 34.725 | 2.678  | H |
| ATOM | 9417 | H2 | HOH A | 3 | 60.514 | 35.220 | 1.398  | H |
| ATOM | 9418 | O  | HOH A | 1 | 60.528 | 35.132 | 24.456 | O |
| ATOM | 9419 | H1 | HOH A | 2 | 61.327 | 34.657 | 24.765 | H |
| ATOM | 9420 | H2 | HOH A | 3 | 60.540 | 35.139 | 23.476 | H |
| ATOM | 9421 | O  | HOH A | 1 | 60.492 | 35.191 | 46.628 | O |
| ATOM | 9422 | H1 | HOH A | 2 | 61.295 | 34.720 | 46.935 | H |
| ATOM | 9423 | H2 | HOH A | 3 | 60.498 | 35.192 | 45.648 | H |
| ATOM | 9424 | O  | HOH A | 1 | 19.828 | 35.224 | 2.388  | O |
| ATOM | 9425 | H1 | HOH A | 2 | 20.646 | 34.779 | 2.692  | H |
| ATOM | 9426 | H2 | HOH A | 3 | 19.833 | 35.232 | 1.408  | H |
| ATOM | 9427 | O  | HOH A | 1 | 19.813 | 35.152 | 24.563 | O |
| ATOM | 9428 | H1 | HOH A | 2 | 20.631 | 34.706 | 24.867 | H |
| ATOM | 9429 | H2 | HOH A | 3 | 19.824 | 35.167 | 23.583 | H |
| ATOM | 9430 | O  | HOH A | 1 | 19.795 | 35.166 | 46.653 | O |
| ATOM | 9431 | H1 | HOH A | 2 | 20.606 | 34.712 | 46.963 | H |
| ATOM | 9432 | H2 | HOH A | 3 | 19.811 | 35.181 | 45.673 | H |
| ATOM | 9433 | O  | HOH A | 1 | 42.417 | 35.371 | 2.349  | O |
| ATOM | 9434 | H1 | HOH A | 2 | 43.227 | 34.917 | 2.662  | H |

|      |      |    |       |   |        |        |        |   |
|------|------|----|-------|---|--------|--------|--------|---|
| ATOM | 9435 | H2 | HOH A | 3 | 42.436 | 35.383 | 1.369  | H |
| ATOM | 9436 | O  | HOH A | 1 | 42.454 | 35.192 | 24.470 | O |
| ATOM | 9437 | H1 | HOH A | 2 | 43.266 | 34.734 | 24.773 | H |
| ATOM | 9438 | H2 | HOH A | 3 | 42.466 | 35.212 | 23.491 | H |
| ATOM | 9439 | O  | HOH A | 1 | 42.439 | 35.184 | 46.583 | O |
| ATOM | 9440 | H1 | HOH A | 2 | 43.251 | 34.729 | 46.890 | H |
| ATOM | 9441 | H2 | HOH A | 3 | 42.447 | 35.189 | 45.603 | H |
| ATOM | 9442 | O  | HOH A | 1 | 65.032 | 35.179 | 2.372  | O |
| ATOM | 9443 | H1 | HOH A | 2 | 65.841 | 34.717 | 2.676  | H |
| ATOM | 9444 | H2 | HOH A | 3 | 65.042 | 35.196 | 1.393  | H |
| ATOM | 9445 | O  | HOH A | 1 | 65.035 | 35.137 | 24.459 | O |
| ATOM | 9446 | H1 | HOH A | 2 | 65.843 | 34.678 | 24.770 | H |
| ATOM | 9447 | H2 | HOH A | 3 | 65.050 | 35.146 | 23.479 | H |
| ATOM | 9448 | O  | HOH A | 1 | 65.008 | 35.177 | 46.626 | O |
| ATOM | 9449 | H1 | HOH A | 2 | 65.818 | 34.720 | 46.935 | H |
| ATOM | 9450 | H2 | HOH A | 3 | 65.020 | 35.186 | 45.646 | H |
| ATOM | 9451 | O  | HOH A | 1 | 22.041 | 39.192 | 2.357  | O |
| ATOM | 9452 | H1 | HOH A | 2 | 22.843 | 38.741 | 2.695  | H |
| ATOM | 9453 | H2 | HOH A | 3 | 21.257 | 38.719 | 2.706  | H |
| ATOM | 9454 | O  | HOH A | 1 | 22.034 | 39.088 | 24.509 | O |
| ATOM | 9455 | H1 | HOH A | 2 | 22.828 | 38.622 | 24.843 | H |
| ATOM | 9456 | H2 | HOH A | 3 | 21.243 | 38.621 | 24.850 | H |
| ATOM | 9457 | O  | HOH A | 1 | 22.040 | 39.101 | 46.616 | O |
| ATOM | 9458 | H1 | HOH A | 2 | 22.840 | 38.637 | 46.941 | H |
| ATOM | 9459 | H2 | HOH A | 3 | 21.254 | 38.636 | 46.970 | H |
| ATOM | 9460 | O  | HOH A | 1 | 44.654 | 39.285 | 2.315  | O |
| ATOM | 9461 | H1 | HOH A | 2 | 45.447 | 38.814 | 2.648  | H |
| ATOM | 9462 | H2 | HOH A | 3 | 43.861 | 38.825 | 2.661  | H |
| ATOM | 9463 | O  | HOH A | 1 | 44.670 | 39.123 | 24.427 | O |
| ATOM | 9464 | H1 | HOH A | 2 | 45.467 | 38.658 | 24.759 | H |
| ATOM | 9465 | H2 | HOH A | 3 | 43.881 | 38.659 | 24.775 | H |
| ATOM | 9466 | O  | HOH A | 1 | 44.667 | 39.128 | 46.550 | O |
| ATOM | 9467 | H1 | HOH A | 2 | 45.464 | 38.664 | 46.882 | H |
| ATOM | 9468 | H2 | HOH A | 3 | 43.879 | 38.663 | 46.900 | H |
| ATOM | 9469 | O  | HOH A | 1 | 67.255 | 39.101 | 2.357  | O |
| ATOM | 9470 | H1 | HOH A | 2 | 68.046 | 38.627 | 2.688  | H |

|      |      |    |       |   |        |        |        |   |
|------|------|----|-------|---|--------|--------|--------|---|
| ATOM | 9471 | H2 | HOH A | 3 | 66.461 | 38.639 | 2.699  | H |
| ATOM | 9472 | O  | HOH A | 1 | 67.256 | 39.069 | 24.448 | O |
| ATOM | 9473 | H1 | HOH A | 2 | 68.049 | 38.604 | 24.789 | H |
| ATOM | 9474 | H2 | HOH A | 3 | 66.463 | 38.611 | 24.797 | H |
| ATOM | 9475 | O  | HOH A | 1 | 67.227 | 39.111 | 46.612 | O |
| ATOM | 9476 | H1 | HOH A | 2 | 68.022 | 38.645 | 46.946 | H |
| ATOM | 9477 | H2 | HOH A | 3 | 66.436 | 38.645 | 46.954 | H |
| ATOM | 9478 | O  | HOH A | 1 | 4.009  | 39.071 | 2.422  | O |
| ATOM | 9479 | H1 | HOH A | 2 | 4.013  | 39.996 | 2.743  | H |
| ATOM | 9480 | H2 | HOH A | 3 | 4.006  | 39.091 | 1.442  | H |
| ATOM | 9481 | O  | HOH A | 1 | 4.010  | 39.062 | 24.535 | O |
| ATOM | 9482 | H1 | HOH A | 2 | 4.014  | 39.989 | 24.854 | H |
| ATOM | 9483 | H2 | HOH A | 3 | 4.009  | 39.080 | 23.555 | H |
| ATOM | 9484 | O  | HOH A | 1 | 3.976  | 39.103 | 46.683 | O |
| ATOM | 9485 | H1 | HOH A | 2 | 3.983  | 40.029 | 47.002 | H |
| ATOM | 9486 | H2 | HOH A | 3 | 3.971  | 39.121 | 45.703 | H |
| ATOM | 9487 | O  | HOH A | 1 | 26.599 | 39.244 | 2.409  | O |
| ATOM | 9488 | H1 | HOH A | 2 | 26.605 | 40.173 | 2.721  | H |
| ATOM | 9489 | H2 | HOH A | 3 | 26.594 | 39.254 | 1.429  | H |
| ATOM | 9490 | O  | HOH A | 1 | 26.600 | 39.116 | 24.552 | O |
| ATOM | 9491 | H1 | HOH A | 2 | 26.608 | 40.041 | 24.875 | H |
| ATOM | 9492 | H2 | HOH A | 3 | 26.594 | 39.137 | 23.572 | H |
| ATOM | 9493 | O  | HOH A | 1 | 26.608 | 39.093 | 46.654 | O |
| ATOM | 9494 | H1 | HOH A | 2 | 26.617 | 40.023 | 46.964 | H |
| ATOM | 9495 | H2 | HOH A | 3 | 26.600 | 39.100 | 45.675 | H |
| ATOM | 9496 | O  | HOH A | 1 | 49.213 | 39.259 | 2.366  | O |
| ATOM | 9497 | H1 | HOH A | 2 | 49.215 | 40.187 | 2.680  | H |
| ATOM | 9498 | H2 | HOH A | 3 | 49.209 | 39.270 | 1.386  | H |
| ATOM | 9499 | O  | HOH A | 1 | 49.236 | 39.103 | 24.468 | O |
| ATOM | 9500 | H1 | HOH A | 2 | 49.245 | 40.028 | 24.793 | H |
| ATOM | 9501 | H2 | HOH A | 3 | 49.230 | 39.126 | 23.488 | H |
| ATOM | 9502 | O  | HOH A | 1 | 49.220 | 39.129 | 46.612 | O |
| ATOM | 9503 | H1 | HOH A | 2 | 49.225 | 40.055 | 46.931 | H |
| ATOM | 9504 | H2 | HOH A | 3 | 49.216 | 39.145 | 45.632 | H |
| ATOM | 9505 | O  | HOH A | 1 | 8.521  | 39.066 | 2.391  | O |
| ATOM | 9506 | H1 | HOH A | 2 | 9.334  | 38.635 | 2.728  | H |

|      |      |    |       |   |        |        |        |   |
|------|------|----|-------|---|--------|--------|--------|---|
| ATOM | 9507 | H2 | HOH A | 3 | 8.511  | 39.990 | 2.717  | H |
| ATOM | 9508 | O  | HOH A | 1 | 8.512  | 39.076 | 24.519 | O |
| ATOM | 9509 | H1 | HOH A | 2 | 9.323  | 38.646 | 24.862 | H |
| ATOM | 9510 | H2 | HOH A | 3 | 8.500  | 40.002 | 24.840 | H |
| ATOM | 9511 | O  | HOH A | 1 | 8.485  | 39.086 | 46.653 | O |
| ATOM | 9512 | H1 | HOH A | 2 | 9.296  | 38.653 | 46.993 | H |
| ATOM | 9513 | H2 | HOH A | 3 | 8.479  | 40.013 | 46.971 | H |
| ATOM | 9514 | O  | HOH A | 1 | 31.110 | 39.280 | 2.371  | O |
| ATOM | 9515 | H1 | HOH A | 2 | 31.919 | 38.844 | 2.710  | H |
| ATOM | 9516 | H2 | HOH A | 3 | 31.109 | 40.206 | 2.692  | H |
| ATOM | 9517 | O  | HOH A | 1 | 31.127 | 39.121 | 24.512 | O |
| ATOM | 9518 | H1 | HOH A | 2 | 31.936 | 38.684 | 24.852 | H |
| ATOM | 9519 | H2 | HOH A | 3 | 31.124 | 40.046 | 24.834 | H |
| ATOM | 9520 | O  | HOH A | 1 | 31.131 | 39.102 | 46.613 | O |
| ATOM | 9521 | H1 | HOH A | 2 | 31.945 | 38.679 | 46.958 | H |
| ATOM | 9522 | H2 | HOH A | 3 | 31.115 | 40.030 | 46.928 | H |
| ATOM | 9523 | O  | HOH A | 1 | 53.713 | 39.212 | 2.337  | O |
| ATOM | 9524 | H1 | HOH A | 2 | 54.521 | 38.775 | 2.680  | H |
| ATOM | 9525 | H2 | HOH A | 3 | 53.707 | 40.136 | 2.663  | H |
| ATOM | 9526 | O  | HOH A | 1 | 53.753 | 39.088 | 24.439 | O |
| ATOM | 9527 | H1 | HOH A | 2 | 54.562 | 38.655 | 24.783 | H |
| ATOM | 9528 | H2 | HOH A | 3 | 53.743 | 40.013 | 24.764 | H |
| ATOM | 9529 | O  | HOH A | 1 | 53.732 | 39.113 | 46.581 | O |
| ATOM | 9530 | H1 | HOH A | 2 | 54.536 | 38.677 | 46.933 | H |
| ATOM | 9531 | H2 | HOH A | 3 | 53.722 | 40.037 | 46.908 | H |
| ATOM | 9532 | O  | HOH A | 1 | 13.077 | 39.114 | 2.407  | O |
| ATOM | 9533 | H1 | HOH A | 2 | 12.273 | 38.650 | 2.721  | H |
| ATOM | 9534 | H2 | HOH A | 3 | 13.060 | 39.120 | 1.427  | H |
| ATOM | 9535 | O  | HOH A | 1 | 13.052 | 39.071 | 24.543 | O |
| ATOM | 9536 | H1 | HOH A | 2 | 12.245 | 38.616 | 24.861 | H |
| ATOM | 9537 | H2 | HOH A | 3 | 13.034 | 39.069 | 23.563 | H |
| ATOM | 9538 | O  | HOH A | 1 | 13.055 | 39.107 | 46.671 | O |
| ATOM | 9539 | H1 | HOH A | 2 | 12.250 | 38.648 | 46.989 | H |
| ATOM | 9540 | H2 | HOH A | 3 | 13.034 | 39.111 | 45.691 | H |
| ATOM | 9541 | O  | HOH A | 1 | 35.656 | 39.326 | 2.373  | O |
| ATOM | 9542 | H1 | HOH A | 2 | 34.855 | 38.862 | 2.693  | H |

|      |      |    |       |   |        |        |        |   |
|------|------|----|-------|---|--------|--------|--------|---|
| ATOM | 9543 | H2 | HOH A | 3 | 35.637 | 39.323 | 1.393  | H |
| ATOM | 9544 | O  | HOH A | 1 | 35.684 | 39.135 | 24.504 | O |
| ATOM | 9545 | H1 | HOH A | 2 | 34.879 | 38.676 | 24.825 | H |
| ATOM | 9546 | H2 | HOH A | 3 | 35.657 | 39.143 | 23.525 | H |
| ATOM | 9547 | O  | HOH A | 1 | 35.692 | 39.125 | 46.602 | O |
| ATOM | 9548 | H1 | HOH A | 2 | 34.885 | 38.669 | 46.922 | H |
| ATOM | 9549 | H2 | HOH A | 3 | 35.674 | 39.121 | 45.622 | H |
| ATOM | 9550 | O  | HOH A | 1 | 58.287 | 39.185 | 2.351  | O |
| ATOM | 9551 | H1 | HOH A | 2 | 57.472 | 38.741 | 2.666  | H |
| ATOM | 9552 | H2 | HOH A | 3 | 58.272 | 39.186 | 1.371  | H |
| ATOM | 9553 | O  | HOH A | 1 | 58.298 | 39.092 | 24.459 | O |
| ATOM | 9554 | H1 | HOH A | 2 | 57.492 | 38.633 | 24.777 | H |
| ATOM | 9555 | H2 | HOH A | 3 | 58.276 | 39.098 | 23.479 | H |
| ATOM | 9556 | O  | HOH A | 1 | 58.270 | 39.151 | 46.607 | O |
| ATOM | 9557 | H1 | HOH A | 2 | 57.467 | 38.687 | 46.924 | H |
| ATOM | 9558 | H2 | HOH A | 3 | 58.256 | 39.146 | 45.627 | H |
| ATOM | 9559 | O  | HOH A | 1 | 17.555 | 39.131 | 2.403  | O |
| ATOM | 9560 | H1 | HOH A | 2 | 16.759 | 38.659 | 2.727  | H |
| ATOM | 9561 | H2 | HOH A | 3 | 17.526 | 39.136 | 1.424  | H |
| ATOM | 9562 | O  | HOH A | 1 | 17.526 | 39.067 | 24.558 | O |
| ATOM | 9563 | H1 | HOH A | 2 | 16.729 | 38.597 | 24.881 | H |
| ATOM | 9564 | H2 | HOH A | 3 | 17.502 | 39.065 | 23.578 | H |
| ATOM | 9565 | O  | HOH A | 1 | 17.532 | 39.081 | 46.674 | O |
| ATOM | 9566 | H1 | HOH A | 2 | 16.730 | 38.614 | 46.990 | H |
| ATOM | 9567 | H2 | HOH A | 3 | 17.511 | 39.090 | 45.695 | H |
| ATOM | 9568 | O  | HOH A | 1 | 40.134 | 39.299 | 2.364  | O |
| ATOM | 9569 | H1 | HOH A | 2 | 39.333 | 38.829 | 2.679  | H |
| ATOM | 9570 | H2 | HOH A | 3 | 40.115 | 39.306 | 1.384  | H |
| ATOM | 9571 | O  | HOH A | 1 | 40.174 | 39.117 | 24.503 | O |
| ATOM | 9572 | H1 | HOH A | 2 | 39.373 | 38.652 | 24.823 | H |
| ATOM | 9573 | H2 | HOH A | 3 | 40.145 | 39.132 | 23.524 | H |
| ATOM | 9574 | O  | HOH A | 1 | 40.169 | 39.088 | 46.603 | O |
| ATOM | 9575 | H1 | HOH A | 2 | 39.371 | 38.622 | 46.928 | H |
| ATOM | 9576 | H2 | HOH A | 3 | 40.145 | 39.081 | 45.623 | H |
| ATOM | 9577 | O  | HOH A | 1 | 62.753 | 39.113 | 2.392  | O |
| ATOM | 9578 | H1 | HOH A | 2 | 61.947 | 38.652 | 2.707  | H |

|      |      |    |       |   |        |        |        |   |
|------|------|----|-------|---|--------|--------|--------|---|
| ATOM | 9579 | H2 | HOH A | 3 | 62.735 | 39.120 | 1.413  | H |
| ATOM | 9580 | O  | HOH A | 1 | 62.760 | 39.069 | 24.475 | O |
| ATOM | 9581 | H1 | HOH A | 2 | 61.963 | 38.596 | 24.793 | H |
| ATOM | 9582 | H2 | HOH A | 3 | 62.740 | 39.071 | 23.495 | H |
| ATOM | 9583 | O  | HOH A | 1 | 62.730 | 39.103 | 46.631 | O |
| ATOM | 9584 | H1 | HOH A | 2 | 61.925 | 38.642 | 46.948 | H |
| ATOM | 9585 | H2 | HOH A | 3 | 62.711 | 39.105 | 45.651 | H |
| ATOM | 9586 | O  | HOH A | 1 | 1.743  | 42.982 | 2.391  | O |
| ATOM | 9587 | H1 | HOH A | 2 | 2.524  | 42.512 | 2.750  | H |
| ATOM | 9588 | H2 | HOH A | 3 | 0.939  | 42.533 | 2.726  | H |
| ATOM | 9589 | O  | HOH A | 1 | 1.751  | 42.962 | 24.489 | O |
| ATOM | 9590 | H1 | HOH A | 2 | 2.531  | 42.492 | 24.851 | H |
| ATOM | 9591 | H2 | HOH A | 3 | 0.946  | 42.508 | 24.816 | H |
| ATOM | 9592 | O  | HOH A | 1 | 1.721  | 42.996 | 46.634 | O |
| ATOM | 9593 | H1 | HOH A | 2 | 2.506  | 42.534 | 46.995 | H |
| ATOM | 9594 | H2 | HOH A | 3 | 0.920  | 42.545 | 46.975 | H |
| ATOM | 9595 | O  | HOH A | 1 | 24.336 | 43.113 | 2.376  | O |
| ATOM | 9596 | H1 | HOH A | 2 | 25.129 | 42.662 | 2.736  | H |
| ATOM | 9597 | H2 | HOH A | 3 | 23.543 | 42.649 | 2.718  | H |
| ATOM | 9598 | O  | HOH A | 1 | 24.335 | 42.996 | 24.538 | O |
| ATOM | 9599 | H1 | HOH A | 2 | 25.125 | 42.536 | 24.893 | H |
| ATOM | 9600 | H2 | HOH A | 3 | 23.539 | 42.534 | 24.874 | H |
| ATOM | 9601 | O  | HOH A | 1 | 24.337 | 42.994 | 46.620 | O |
| ATOM | 9602 | H1 | HOH A | 2 | 25.123 | 42.532 | 46.979 | H |
| ATOM | 9603 | H2 | HOH A | 3 | 23.538 | 42.541 | 46.960 | H |
| ATOM | 9604 | O  | HOH A | 1 | 46.937 | 43.182 | 2.316  | O |
| ATOM | 9605 | H1 | HOH A | 2 | 47.717 | 42.711 | 2.676  | H |
| ATOM | 9606 | H2 | HOH A | 3 | 46.131 | 42.736 | 2.653  | H |
| ATOM | 9607 | O  | HOH A | 1 | 46.982 | 43.004 | 24.443 | O |
| ATOM | 9608 | H1 | HOH A | 2 | 47.766 | 42.538 | 24.800 | H |
| ATOM | 9609 | H2 | HOH A | 3 | 46.181 | 42.555 | 24.785 | H |
| ATOM | 9610 | O  | HOH A | 1 | 46.965 | 43.025 | 46.577 | O |
| ATOM | 9611 | H1 | HOH A | 2 | 47.750 | 42.561 | 46.937 | H |
| ATOM | 9612 | H2 | HOH A | 3 | 46.164 | 42.574 | 46.918 | H |
| ATOM | 9613 | O  | HOH A | 1 | 6.248  | 42.984 | 2.417  | O |
| ATOM | 9614 | H1 | HOH A | 2 | 6.231  | 43.909 | 2.741  | H |

|      |      |    |       |   |        |        |        |   |
|------|------|----|-------|---|--------|--------|--------|---|
| ATOM | 9615 | H2 | HOH A | 3 | 6.253  | 43.006 | 1.438  | H |
| ATOM | 9616 | O  | HOH A | 1 | 6.237  | 42.978 | 24.530 | O |
| ATOM | 9617 | H1 | HOH A | 2 | 6.218  | 43.905 | 24.850 | H |
| ATOM | 9618 | H2 | HOH A | 3 | 6.237  | 42.996 | 23.550 | H |
| ATOM | 9619 | O  | HOH A | 1 | 6.211  | 43.009 | 46.679 | O |
| ATOM | 9620 | H1 | HOH A | 2 | 6.204  | 43.934 | 47.004 | H |
| ATOM | 9621 | H2 | HOH A | 3 | 6.208  | 43.032 | 45.700 | H |
| ATOM | 9622 | O  | HOH A | 1 | 28.834 | 43.172 | 2.392  | O |
| ATOM | 9623 | H1 | HOH A | 2 | 28.820 | 44.099 | 2.709  | H |
| ATOM | 9624 | H2 | HOH A | 3 | 28.835 | 43.186 | 1.412  | H |
| ATOM | 9625 | O  | HOH A | 1 | 28.834 | 43.035 | 24.543 | O |
| ATOM | 9626 | H1 | HOH A | 2 | 28.824 | 43.961 | 24.864 | H |
| ATOM | 9627 | H2 | HOH A | 3 | 28.828 | 43.053 | 23.564 | H |
| ATOM | 9628 | O  | HOH A | 1 | 28.840 | 43.025 | 46.632 | O |
| ATOM | 9629 | H1 | HOH A | 2 | 28.821 | 43.952 | 46.949 | H |
| ATOM | 9630 | H2 | HOH A | 3 | 28.840 | 43.040 | 45.652 | H |
| ATOM | 9631 | O  | HOH A | 1 | 51.431 | 43.161 | 2.350  | O |
| ATOM | 9632 | H1 | HOH A | 2 | 51.420 | 44.091 | 2.659  | H |
| ATOM | 9633 | H2 | HOH A | 3 | 51.435 | 43.168 | 1.370  | H |
| ATOM | 9634 | O  | HOH A | 1 | 51.478 | 43.010 | 24.457 | O |
| ATOM | 9635 | H1 | HOH A | 2 | 51.464 | 43.936 | 24.778 | H |
| ATOM | 9636 | H2 | HOH A | 3 | 51.483 | 43.028 | 23.477 | H |
| ATOM | 9637 | O  | HOH A | 1 | 51.450 | 43.043 | 46.599 | O |
| ATOM | 9638 | H1 | HOH A | 2 | 51.439 | 43.971 | 46.915 | H |
| ATOM | 9639 | H2 | HOH A | 3 | 51.454 | 43.057 | 45.619 | H |
| ATOM | 9640 | O  | HOH A | 1 | 10.773 | 42.991 | 2.402  | O |
| ATOM | 9641 | H1 | HOH A | 2 | 11.571 | 42.539 | 2.748  | H |
| ATOM | 9642 | H2 | HOH A | 3 | 10.780 | 43.913 | 2.733  | H |
| ATOM | 9643 | O  | HOH A | 1 | 10.756 | 42.957 | 24.544 | O |
| ATOM | 9644 | H1 | HOH A | 2 | 11.555 | 42.507 | 24.889 | H |
| ATOM | 9645 | H2 | HOH A | 3 | 10.765 | 43.881 | 24.869 | H |
| ATOM | 9646 | O  | HOH A | 1 | 10.753 | 42.982 | 46.668 | O |
| ATOM | 9647 | H1 | HOH A | 2 | 11.549 | 42.530 | 47.017 | H |
| ATOM | 9648 | H2 | HOH A | 3 | 10.762 | 43.906 | 46.994 | H |
| ATOM | 9649 | O  | HOH A | 1 | 33.362 | 43.206 | 2.373  | O |
| ATOM | 9650 | H1 | HOH A | 2 | 34.157 | 42.746 | 2.713  | H |



|      |      |    |       |   |        |        |        |   |
|------|------|----|-------|---|--------|--------|--------|---|
| ATOM | 9651 | H2 | HOH A | 3 | 33.381 | 44.129 | 2.704  | H |
| ATOM | 9652 | O  | HOH A | 1 | 33.378 | 43.028 | 24.519 | O |
| ATOM | 9653 | H1 | HOH A | 2 | 34.172 | 42.570 | 24.864 | H |
| ATOM | 9654 | H2 | HOH A | 3 | 33.388 | 43.948 | 24.855 | H |
| ATOM | 9655 | O  | HOH A | 1 | 33.375 | 42.980 | 46.617 | O |
| ATOM | 9656 | H1 | HOH A | 2 | 34.177 | 42.537 | 46.964 | H |
| ATOM | 9657 | H2 | HOH A | 3 | 33.380 | 43.907 | 46.937 | H |
| ATOM | 9658 | O  | HOH A | 1 | 55.971 | 43.085 | 2.346  | O |
| ATOM | 9659 | H1 | HOH A | 2 | 56.763 | 42.628 | 2.698  | H |
| ATOM | 9660 | H2 | HOH A | 3 | 55.983 | 44.008 | 2.676  | H |
| ATOM | 9661 | O  | HOH A | 1 | 56.003 | 43.000 | 24.447 | O |
| ATOM | 9662 | H1 | HOH A | 2 | 56.796 | 42.542 | 24.796 | H |
| ATOM | 9663 | H2 | HOH A | 3 | 56.014 | 43.921 | 24.780 | H |
| ATOM | 9664 | O  | HOH A | 1 | 55.957 | 43.034 | 46.610 | O |
| ATOM | 9665 | H1 | HOH A | 2 | 56.754 | 42.582 | 46.960 | H |
| ATOM | 9666 | H2 | HOH A | 3 | 55.962 | 43.956 | 46.942 | H |
| ATOM | 9667 | O  | HOH A | 1 | 15.283 | 43.049 | 2.396  | O |
| ATOM | 9668 | H1 | HOH A | 2 | 16.076 | 42.580 | 2.731  | H |
| ATOM | 9669 | H2 | HOH A | 3 | 14.490 | 42.578 | 2.727  | H |
| ATOM | 9670 | O  | HOH A | 1 | 15.283 | 43.019 | 24.560 | O |
| ATOM | 9671 | H1 | HOH A | 2 | 16.075 | 42.547 | 24.892 | H |
| ATOM | 9672 | H2 | HOH A | 3 | 14.489 | 42.546 | 24.887 | H |
| ATOM | 9673 | O  | HOH A | 1 | 15.271 | 43.018 | 46.671 | O |
| ATOM | 9674 | H1 | HOH A | 2 | 16.059 | 42.542 | 47.005 | H |
| ATOM | 9675 | H2 | HOH A | 3 | 14.473 | 42.557 | 47.005 | H |
| ATOM | 9676 | O  | HOH A | 1 | 37.876 | 43.251 | 2.382  | O |
| ATOM | 9677 | H1 | HOH A | 2 | 38.663 | 42.768 | 2.710  | H |
| ATOM | 9678 | H2 | HOH A | 3 | 37.078 | 42.789 | 2.712  | H |
| ATOM | 9679 | O  | HOH A | 1 | 37.892 | 43.054 | 24.498 | O |
| ATOM | 9680 | H1 | HOH A | 2 | 38.682 | 42.577 | 24.827 | H |
| ATOM | 9681 | H2 | HOH A | 3 | 37.096 | 42.585 | 24.826 | H |
| ATOM | 9682 | O  | HOH A | 1 | 37.908 | 43.041 | 46.601 | O |
| ATOM | 9683 | H1 | HOH A | 2 | 38.697 | 42.570 | 46.939 | H |
| ATOM | 9684 | H2 | HOH A | 3 | 37.112 | 42.573 | 46.929 | H |
| ATOM | 9685 | O  | HOH A | 1 | 60.488 | 43.100 | 2.369  | O |
| ATOM | 9686 | H1 | HOH A | 2 | 61.273 | 42.613 | 2.697  | H |

|      |      |    |       |   |        |        |        |   |
|------|------|----|-------|---|--------|--------|--------|---|
| ATOM | 9687 | H2 | HOH A | 3 | 59.687 | 42.636 | 2.690  | H |
| ATOM | 9688 | O  | HOH A | 1 | 60.508 | 43.024 | 24.460 | O |
| ATOM | 9689 | H1 | HOH A | 2 | 61.295 | 42.545 | 24.796 | H |
| ATOM | 9690 | H2 | HOH A | 3 | 59.709 | 42.559 | 24.785 | H |
| ATOM | 9691 | O  | HOH A | 1 | 60.484 | 43.061 | 46.619 | O |
| ATOM | 9692 | H1 | HOH A | 2 | 61.270 | 42.587 | 46.961 | H |
| ATOM | 9693 | H2 | HOH A | 3 | 59.685 | 42.597 | 46.946 | H |
| ATOM | 9694 | O  | HOH A | 1 | 19.787 | 43.079 | 2.398  | O |
| ATOM | 9695 | H1 | HOH A | 2 | 20.595 | 42.618 | 2.709  | H |
| ATOM | 9696 | H2 | HOH A | 3 | 19.796 | 43.076 | 1.418  | H |
| ATOM | 9697 | O  | HOH A | 1 | 19.794 | 43.001 | 24.557 | O |
| ATOM | 9698 | H1 | HOH A | 2 | 20.600 | 42.540 | 24.871 | H |
| ATOM | 9699 | H2 | HOH A | 3 | 19.804 | 42.996 | 23.577 | H |
| ATOM | 9700 | O  | HOH A | 1 | 19.784 | 43.007 | 46.666 | O |
| ATOM | 9701 | H1 | HOH A | 2 | 20.589 | 42.545 | 46.982 | H |
| ATOM | 9702 | H2 | HOH A | 3 | 19.794 | 42.996 | 45.686 | H |
| ATOM | 9703 | O  | HOH A | 1 | 42.380 | 43.213 | 2.354  | O |
| ATOM | 9704 | H1 | HOH A | 2 | 43.179 | 42.742 | 2.669  | H |
| ATOM | 9705 | H2 | HOH A | 3 | 42.393 | 43.210 | 1.374  | H |
| ATOM | 9706 | O  | HOH A | 1 | 42.420 | 43.037 | 24.485 | O |
| ATOM | 9707 | H1 | HOH A | 2 | 43.220 | 42.566 | 24.800 | H |
| ATOM | 9708 | H2 | HOH A | 3 | 42.432 | 43.031 | 23.505 | H |
| ATOM | 9709 | O  | HOH A | 1 | 42.413 | 43.040 | 46.591 | O |
| ATOM | 9710 | H1 | HOH A | 2 | 43.215 | 42.574 | 46.907 | H |
| ATOM | 9711 | H2 | HOH A | 3 | 42.424 | 43.032 | 45.611 | H |
| ATOM | 9712 | O  | HOH A | 1 | 64.990 | 43.032 | 2.382  | O |
| ATOM | 9713 | H1 | HOH A | 2 | 65.787 | 42.562 | 2.705  | H |
| ATOM | 9714 | H2 | HOH A | 3 | 65.012 | 43.029 | 1.402  | H |
| ATOM | 9715 | O  | HOH A | 1 | 65.009 | 42.998 | 24.472 | O |
| ATOM | 9716 | H1 | HOH A | 2 | 65.808 | 42.529 | 24.791 | H |
| ATOM | 9717 | H2 | HOH A | 3 | 65.027 | 42.996 | 23.493 | H |
| ATOM | 9718 | O  | HOH A | 1 | 64.978 | 43.035 | 46.637 | O |
| ATOM | 9719 | H1 | HOH A | 2 | 65.777 | 42.566 | 46.956 | H |
| ATOM | 9720 | H2 | HOH A | 3 | 64.994 | 43.028 | 45.657 | H |
